# Supplementary material for: Ultra-High Mass Resolution MALDI Imaging Mass Spectrometry of Proteins and Metabolites in a Mouse Model of Glioblastoma
Source: PubMed Central journal article supplement (PMC5429601; doi:10.1038/s41598-017-00703-w), 2017-04-04
Supplement: 41598_2017_703_MOESM2_ESM.pdf [file 41598_2017_703_MOESM2_ESM.pdf]

| Accession | Description                                                                         | Contaminant | Coverage  | # Peptides | # PSMs | # Unique Peptides | MW [kDa] | calc. pI | Area: F3: Sample | Area: F2: Sample | Area: F1: Sample | Score Sequest HT |
|-----------|-------------------------------------------------------------------------------------|-------------|-----------|------------|--------|-------------------|----------|----------|------------------|------------------|------------------|------------------|
| P56382    | ATP synthase subunit epsilon, mitochondrial OS=Mus musculus GN=Atp5e PE=1 SV=2      |             | 15.384615 | 1          | 1      | 1                 | 5.834    | 10.01    |                  | 1700000          |                  | 2.10             |
| P62892    | 60S ribosomal protein L39 OS=Mus musculus GN=Rpl39 PE=1 SV=2                        |             | 19.607843 | 1          | 1      | 1                 | 6.403    | 12.56    | 970000           |                  |                  | 2.57             |
| P0DN34    | NADH dehydrogenase [ubiquinone] 1 beta subcomplex subunit 1 OS=Mus musculus GN=     |             | 19.298246 | 1          | 2      | 1                 | 6.95     | 8.21     | 2100000          |                  | 2900000          | 5.45             |
| P17665    | Cytochrome c oxidase subunit 7C, mitochondrial OS=Mus musculus GN=Cox7c PE=1 SV=    |             | 14.285714 | 1          | 1      | 1                 | 7.328    | 11       | 4500000          |                  |                  | 1.96             |
| Q8R111    | Cytochrome b-c1 complex subunit 9 OS=Mus musculus GN=Uqcr10 PE=1 SV=1               |             | 37.5      | 2          | 7      | 2                 | 7.441    | 9.19     | 58000000         | 31000000         | 26000000         | 26.92            |
| P60761    | Neurogranin OS=Mus musculus GN=Nrgn PE=1 SV=1                                       |             | 17.948718 | 1          | 2      | 1                 | 7.492    | 7.05     | 54000            |                  | 3500000          | 5.29             |
| P62858    | 40S ribosomal protein S28 OS=Mus musculus GN=Rps28 PE=1 SV=1                        |             | 17.391304 | 1          | 2      | 1                 | 7.836    | 10.7     | 1400000          |                  | 1500000          | 5.48             |
| P63213    | Guanine nucleotide-binding protein G(I)/G(S)/G(O) subunit gamma-2 OS=Mus musculus ( |             | 25.352113 | 2          | 2      | 2                 | 7.845    | 7.99     |                  |                  | 11000000         | 6.68             |
| Q9JMF3    | Guanine nucleotide-binding protein G(I)/G(S)/G(O) subunit gamma-13 OS=Mus musculus  |             | 11.940299 | 1          | 2      | 1                 | 7.974    | 5.45     | 520000           | 540000           |                  | 4.95             |
| Q9DAS9    | Guanine nucleotide-binding protein G(I)/G(S)/G(O) subunit gamma-12 OS=Mus musculus  |             | 15.277778 | 1          | 1      | 1                 | 7.992    | 8.97     |                  |                  | 630000           | 2.47             |
| Q9JJ18    | 60S ribosomal protein L38 OS=Mus musculus GN=Rpl38 PE=1 SV=3                        |             | 14.285714 | 1          | 1      | 1                 | 8.199    | 10.1     |                  |                  |                  | 2.04             |
| Q06185    | ATP synthase subunit e, mitochondrial OS=Mus musculus GN=Atp5i PE=1 SV=2            |             | 16.901408 | 1          | 2      | 1                 | 8.23     | 9.35     | 23000000         |                  | 27000000         | 6.19             |
| P63216    | Guanine nucleotide-binding protein G(I)/G(S)/G(O) subunit gamma-3 OS=Mus musculus ( |             | 20        | 1          | 6      | 1                 | 8.299    | 7.78     | 6100000          | 1300000          | 6100000          | 18.51            |
| Q3UZP4    | Small VCP/p97-interacting protein OS=Mus musculus GN=Svip PE=3 SV=1                 |             | 32.467532 | 2          | 4      | 2                 | 8.358    | 8.91     | 2100000          | 640000           | 990000           | 10.62            |
| P50153    | Guanine nucleotide-binding protein G(I)/G(S)/G(O) subunit gamma-4 OS=Mus musculus ( |             | 21.333333 | 1          | 2      | 1                 | 8.399    | 7.08     | 2600000          |                  | 1700000          | 6.49             |
| Q9CPQ1    | Cytochrome c oxidase subunit 6C OS=Mus musculus GN=Cox6c PE=1 SV=3                  |             | 28.947368 | 3          | 9      | 3                 | 8.464    | 10.14    | 30000000         | 13000000         | 26000000         | 19.62            |
| P59648    | FXYD domain-containing ion transport regulator 7 OS=Mus musculus GN=Fxyd7 PE=3 SV=  |             | 16.25     | 1          | 2      | 1                 | 8.481    | 7.84     |                  | 24000000         | 30000000         | 5.12             |
| P62309    | Small nuclear ribonucleoprotein G OS=Mus musculus GN=Snrpg PE=1 SV=1                |             | 15.789474 | 1          | 1      | 1                 | 8.49     | 8.88     |                  |                  | 720000           | 2.96             |
| Q9CQZ1    | Heat shock factor-binding protein 1 OS=Mus musculus GN=Hsbp1 PE=1 SV=1              |             | 39.473684 | 2          | 8      | 2                 | 8.605    | 4.31     | 2500000          | 1400000          | 3800000          | 27.67            |
| P29595    | NEDD8 OS=Mus musculus GN=Nedd8 PE=1 SV=2                                            |             | 13.580247 | 1          | 3      | 1                 | 8.967    | 7.25     | 5400000          | 1600000          | 4100000          | 8.71             |
| P48771    | Cytochrome c oxidase subunit 7A2, mitochondrial OS=Mus musculus GN=Cox7a2 PE=1 SV=  |             | 27.710843 | 2          | 3      | 2                 | 9.285    | 10.27    |                  | 1900000          | 4700000          | 7.59             |
| Q62425    | Cytochrome c oxidase subunit NDUF4A OS=Mus musculus GN=Ndufa4 PE=1 SV=2             |             | 36.585366 | 3          | 8      | 3                 | 9.321    | 9.52     | 11000000         | 14000000         | 17000000         | 23.27            |
| Q6ZWIU9   | 40S ribosomal protein S27 OS=Mus musculus GN=Rps27 PE=1 SV=3                        |             | 13.095238 | 1          | 2      | 1                 | 9.455    | 9.45     | 5600000          |                  |                  | 3.01             |
| Q9CQ69    | Cytochrome b-c1 complex subunit 8 OS=Mus musculus GN=Uqcrc PE=1 SV=3                |             | 19.512195 | 2          | 9      | 2                 | 9.762    | 10.26    | 7100000          | 8500000          | 5400000          | 20.68            |
| Q9CQS8    | Protein transport protein Sec61 subunit beta OS=Mus musculus GN=Sec61b PE=1 SV=3    |             | 10.416667 | 1          | 3      | 1                 | 9.952    | 11.56    | 6000000          | 1600000          | 2200000          | 6.92             |
| P56391    | Cytochrome c oxidase subunit 6B1 OS=Mus musculus GN=Cox6b1 PE=1 SV=2                |             | 12.790698 | 1          | 1      | 1                 | 10.065   | 8.72     |                  | 1100000          |                  | 2.31             |
| P56135    | ATP synthase subunit f, mitochondrial OS=Mus musculus GN=Atp5j2 PE=1 SV=3           |             | 26.136364 | 2          | 6      | 2                 | 10.337   | 9.95     | 17000000         | 9600000          | 16000000         | 12.72            |
| Q9D0M5    | Dynein light chain 2, cytoplasmic OS=Mus musculus GN=Dynll2 PE=1 SV=1               |             | 37.078652 | 2          | 6      | 2                 | 10.343   | 7.37     | 2300000          | 2100000          | 4200000          | 12.53            |
| Q9D164    | FXYD domain-containing ion transport regulator 6 OS=Mus musculus GN=Fxyd6 PE=1 SV=  |             | 35.106383 | 2          | 7      | 2                 | 10.367   | 5.11     | 16000000         | 7500000          | 17000000         | 32.49            |
| P99028    | Cytochrome b-c1 complex subunit 6, mitochondrial OS=Mus musculus GN=Uqcrc PE=1 SV=  |             | 37.078652 | 2          | 5      | 2                 | 10.428   | 4.87     | 5000000          | 5600000          | 6700000          | 15.39            |
| P56565    | Protein S100-A1 OS=Mus musculus GN=S100a1 PE=1 SV=2                                 |             | 13.829787 | 1          | 1      | 1                 | 10.498   | 4.5      |                  | 3700000          |                  | 2.77             |
| P50114    | Protein S100-B OS=Mus musculus GN=S100b PE=1 SV=2                                   |             | 16.304348 | 1          | 1      | 1                 | 10.721   | 4.55     |                  | 2200000          |                  | 3.88             |
| O70554    | Small proline-rich protein 2B OS=Mus musculus GN=Sprr2b PE=2 SV=1                   |             | 9.1836735 | 1          | 2      | 1                 | 10.727   | 7.46     |                  |                  | 30000000         | 4.52             |
| P61957    | Small ubiquitin-related modifier 2 OS=Mus musculus GN=Sumo2 PE=1 SV=1               |             | 23.157895 | 2          | 3      | 2                 | 10.864   | 5.5      | 7600000          |                  | 7400000          | 8.87             |
| Q9CQ75    | NADH dehydrogenase [ubiquinone] 1 alpha subcomplex subunit 2 OS=Mus musculus GN=    |             | 14.141414 | 1          | 3      | 1                 | 10.909   | 9.99     | 3900000          | 1500000          | 2500000          | 8.69             |
| Q3LHH8    | Exocrine gland-secreted peptide 1 OS=Mus musculus GN=Esp1 PE=1 SV=1                 |             | 9.8039216 | 1          | 1      | 1                 | 11.339   | 8.91     |                  | 23000000         |                  | 1.83             |
| P62806    | Histone H4 OS=Mus musculus GN=Hist1h4a PE=1 SV=2                                    |             | 56.31068  | 9          | 60     | 9                 | 11.36    | 11.36    | 390000000        | 180000000        | 220000000        | 164.97           |
| Q9CPQ8    | ATP synthase subunit g, mitochondrial OS=Mus musculus GN=Atp5l PE=1 SV=1            |             | 19.417476 | 2          | 7      | 2                 | 11.417   | 9.74     | 12000000         | 2900000          | 5400000          | 17.70            |
| Q9D0J8    | Parathyrosin OS=Mus musculus GN=Ptms PE=1 SV=3                                      |             | 10.891089 | 1          | 2      | 1                 | 11.423   | 4.22     | 5100000          | 3600000          |                  | 4.88             |
| P47955    | 60S acidic ribosomal protein P1 OS=Mus musculus GN=Rplp1 PE=1 SV=1                  |             | 14.035088 | 1          | 1      | 1                 | 11.468   | 4.32     |                  |                  | 670000           | 2.86             |
| P63024    | Vesicle-associated membrane protein 3 OS=Mus musculus GN=Vamp3 PE=1 SV=1            |             | 38.834951 | 4          | 18     | 1                 | 11.473   | 8.5      | 480000           |                  |                  | 67.68            |
| P62897    | Cytochrome c, somatic OS=Mus musculus GN=Cycc PE=1 SV=2                             |             | 20.952381 | 2          | 6      | 2                 | 11.598   | 9.58     | 3500000          | 2400000          | 1500000          | 18.01            |
| P17095    | High mobility group protein HMG-I/HMG-Y OS=Mus musculus GN=Hmga1 PE=1 SV=4          |             | 8.411215  | 1          | 3      | 1                 | 11.607   | 10.32    |                  |                  |                  | 7.08             |
| P99027    | 60S acidic ribosomal protein P2 OS=Mus musculus GN=Rplp2 PE=1 SV=3                  |             | 60        | 5          | 17     | 5                 | 11.644   | 4.54     | 36000000         | 17000000         | 36000000         | 59.14            |
| P10639    | Thioredoxin OS=Mus musculus GN=Txn PE=1 SV=3                                        |             | 20.952381 | 2          | 4      | 2                 | 11.668   | 4.92     |                  | 3700000          | 5500000          | 12.54            |

|        |                                                                                     |           |   |    |   |        |       |          |          |           |        |
|--------|-------------------------------------------------------------------------------------|-----------|---|----|---|--------|-------|----------|----------|-----------|--------|
| Q9CQZ6 | NADH dehydrogenase [ubiquinone] 1 beta subcomplex subunit 3 OS=Mus musculus GN=     | 17.307692 | 2 | 6  | 2 | 11.685 | 9.04  | 42000000 | 14000000 | 26000000  | 15.05  |
| P01837 | Ig kappa chain C region OS=Mus musculus PE=1 SV=1                                   | 28.301887 | 2 | 4  | 2 | 11.771 | 5.41  | 1900000  | 840000   | 1200000   | 12.74  |
| Q9CPS8 | Small membrane A-kinase anchor protein OS=Mus musculus PE=1 SV=1                    | 12.264151 | 1 | 2  | 1 | 11.919 | 4.25  | 2200000  |          | 2600000   | 5.17   |
| Q91WS0 | CDGSH iron-sulfur domain-containing protein 1 OS=Mus musculus GN=Cisd1 PE=1 SV=     | 35.185185 | 3 | 15 | 3 | 12.089 | 9.06  | 17000000 | 9300000  | 15000000  | 53.88  |
| P26350 | Prothymosin alpha OS=Mus musculus GN=Ptma PE=1 SV=2                                 | 12.612613 | 2 | 4  | 2 | 12.247 | 3.79  | 1100000  | 510000   | 1600000   | 13.21  |
| P62878 | E3 ubiquitin-protein ligase RBX1 OS=Mus musculus GN=Rbx1 PE=1 SV=1                  | 7.4074074 | 1 | 2  | 1 | 12.266 | 6.96  | 3200000  |          | 2900000   | 4.75   |
| P43024 | Cytochrome c oxidase subunit 6A1, mitochondrial OS=Mus musculus GN=Cox6a1 PE=1 S    | 14.414414 | 1 | 2  | 1 | 12.344 | 9.98  |          | 2200000  | 1700000   | 2.96   |
| P83882 | 60S ribosomal protein L36a OS=Mus musculus GN=Rpl36a PE=1 SV=2                      | 8.490566  | 1 | 2  | 1 | 12.433 | 10.58 |          | 710000   | 1300000   | 4.32   |
| P63030 | Mitochondrial pyruvate carrier 1 OS=Mus musculus GN=Mpc1 PE=1 SV=1                  | 7.3394495 | 1 | 2  | 1 | 12.446 | 9.61  | 12000000 |          | 10000000  | 4.82   |
| P83940 | Transcription elongation factor B polypeptide 1 OS=Mus musculus GN=Tceb1 PE=1 SV=1  | 12.5      | 1 | 1  | 1 | 12.465 | 4.78  |          | 510000   |           | 2.30   |
| P97450 | ATP synthase-coupling factor 6, mitochondrial OS=Mus musculus GN=Atp5j PE=1 SV=1    | 17.592593 | 1 | 1  | 1 | 12.489 | 9.36  |          | 2500000  |           | 3.48   |
| O55142 | 60S ribosomal protein L35a OS=Mus musculus GN=Rpl35a PE=1 SV=2                      | 14.545455 | 2 | 4  | 2 | 12.546 | 10.89 | 13000000 | 6800000  | 7300000   | 8.63   |
| Q99LY9 | NADH dehydrogenase [ubiquinone] iron-sulfur protein 5 OS=Mus musculus GN=Ndufs5 F   | 11.320755 | 1 | 3  | 1 | 12.639 | 8.92  | 4900000  | 2700000  | 6900000   | 10.24  |
| P63044 | Vesicle-associated membrane protein 2 OS=Mus musculus GN=Vamp2 PE=1 SV=2            | 35.344828 | 5 | 34 | 2 | 12.683 | 8.13  | 28000000 | 11000000 | 41000000  | 139.78 |
| P62889 | 60S ribosomal protein L30 OS=Mus musculus GN=Rpl30 PE=1 SV=2                        | 23.478261 | 2 | 5  | 2 | 12.776 | 9.63  | 4100000  | 4000000  | 4000000   | 14.99  |
| Q62442 | Vesicle-associated membrane protein 1 OS=Mus musculus GN=Vamp1 PE=1 SV=1            | 33.898305 | 3 | 11 | 2 | 12.882 | 6.65  | 3500000  | 1400000  | 3600000   | 39.22  |
| P62855 | 40S ribosomal protein S26 OS=Mus musculus GN=Rps26 PE=1 SV=3                        | 20.869565 | 2 | 6  | 2 | 13.007 | 11    | 9100000  | 4300000  | 7400000   | 18.50  |
| Q9D882 | Uncharacterized protein C10orf35 homolog OS=Mus musculus PE=1 SV=1                  | 9.1666667 | 1 | 1  | 1 | 13.11  | 11.41 |          |          | 1100000   | 2.16   |
| P62869 | Transcription elongation factor B polypeptide 2 OS=Mus musculus GN=Tceb2 PE=1 SV=1  | 7.6271186 | 1 | 3  | 1 | 13.162 | 5.01  |          | 1700000  | 1700000   | 6.85   |
| P03899 | NADH-ubiquinone oxidoreductase chain 3 OS=Mus musculus GN=Mtdn3 PE=1 SV=3           | 13.043478 | 1 | 4  | 1 | 13.21  | 4.64  | 4100000  | 2700000  | 3400000   | 9.88   |
| Q9D1R9 | 60S ribosomal protein L34 OS=Mus musculus GN=Rpl34 PE=1 SV=2                        | 14.529915 | 2 | 4  | 2 | 13.284 | 11.47 | 12000000 | 6000000  |           | 8.33   |
| Q9CPP6 | NADH dehydrogenase [ubiquinone] 1 alpha subcomplex subunit 5 OS=Mus musculus GN     | 22.413793 | 3 | 7  | 3 | 13.351 | 8.1   | 13000000 | 7300000  | 11000000  | 22.40  |
| Q9D1K2 | V-type proton ATPase subunit F OS=Mus musculus GN=Atp6v1f PE=1 SV=2                 | 17.647059 | 2 | 6  | 2 | 13.362 | 5.82  | 8400000  | 5700000  | 3100000   | 15.20  |
| P60867 | 40S ribosomal protein S20 OS=Mus musculus GN=Rps20 PE=1 SV=1                        | 19.327731 | 2 | 6  | 2 | 13.364 | 9.94  | 11000000 | 6900000  | 11000000  | 16.35  |
| Q8R404 | MICOS complex subunit MIC13 OS=Mus musculus GN=Mic13 PE=1 SV=1                      | 5.8823529 | 1 | 3  | 1 | 13.365 | 8.63  | 9000000  | 6500000  | 7100000   | 6.56   |
| P62317 | Small nuclear ribonucleoprotein Sm D2 OS=Mus musculus GN=Snrpd2 PE=1 SV=1           | 39.830508 | 4 | 7  | 4 | 13.518 | 9.91  | 4300000  | 2200000  | 3700000   | 17.78  |
| Q9D855 | Cytochrome b-c1 complex subunit 7 OS=Mus musculus GN=Uqcrcb PE=1 SV=3               | 24.324324 | 3 | 11 | 3 | 13.519 | 9.11  | 14000000 | 5300000  | 7700000   | 27.74  |
| P0C0S6 | Histone H2A.Z OS=Mus musculus GN=H2afz PE=1 SV=2                                    | 20.3125   | 3 | 10 | 1 | 13.545 | 10.58 | 46000000 | 21000000 | 30000000  | 29.28  |
| O55186 | CD59A glycoprotein OS=Mus musculus GN=Cd59a PE=2 SV=1                               | 13.821138 | 1 | 1  | 1 | 13.639 | 7.47  |          |          | 2200000   | 2.52   |
| Q9WTT4 | V-type proton ATPase subunit G 2 OS=Mus musculus GN=Atp6v1g2 PE=1 SV=1              | 36.440678 | 4 | 16 | 4 | 13.643 | 10.26 | 2400000  | 3700000  | 2400000   | 54.50  |
| Q9CR51 | V-type proton ATPase subunit G 1 OS=Mus musculus GN=Atp6v1g1 PE=1 SV=3              | 23.728814 | 2 | 4  | 2 | 13.716 | 7.97  | 2600000  | 6000000  | 6700000   | 13.35  |
| P62852 | 40S ribosomal protein S25 OS=Mus musculus GN=Rps25 PE=1 SV=1                        | 22.4      | 3 | 9  | 3 | 13.734 | 10.11 | 3700000  | 2900000  | 2800000   | 20.94  |
| P70349 | Histidine triad nucleotide-binding protein 1 OS=Mus musculus GN=Hint1 PE=1 SV=3     | 11.111111 | 1 | 1  | 1 | 13.768 | 6.87  | 3200000  |          |           | 2.68   |
| Q64253 | Lymphocyte antigen 6E OS=Mus musculus GN=Ly6e PE=1 SV=2                             | 10.769231 | 1 | 3  | 1 | 13.791 | 7.05  | 1200000  | 1500000  | 1700000   | 9.49   |
| P19536 | Cytochrome c oxidase subunit 5B, mitochondrial OS=Mus musculus GN=Cox5b PE=1 SV     | 15.625    | 2 | 5  | 2 | 13.804 | 8.38  | 5800000  | 9000000  | 11000000  | 13.30  |
| P10853 | Histone H2B type 1-F/J/L OS=Mus musculus GN=Hist1h2bf PE=1 SV=2                     | 41.269841 | 7 | 40 | 4 | 13.928 | 10.32 | 8600000  | 83000000 | 100000000 | 137.85 |
| Q64524 | Histone H2B type 2-E OS=Mus musculus GN=Hist2h2be PE=1 SV=3                         | 34.920635 | 4 | 31 | 1 | 13.985 | 10.32 |          | 17000000 | 20000000  | 105.55 |
| Q91ZZ3 | Beta-synuclein OS=Mus musculus GN=Snca PE=1 SV=1                                    | 17.293233 | 2 | 6  | 1 | 14.043 | 4.37  | 12000000 | 14000000 | 9600000   | 18.89  |
| P22752 | Histone H2A type 1 OS=Mus musculus GN=Hist1h2ab PE=1 SV=3                           | 54.615385 | 5 | 22 | 3 | 14.127 | 11.05 | 37000000 | 33000000 | 16000000  | 66.60  |
| Q9CQ54 | NADH dehydrogenase [ubiquinone] 1 subunit C2 OS=Mus musculus GN=Ndufc2 PE=1 S       | 31.666667 | 4 | 5  | 4 | 14.154 | 9.2   | 6500000  |          | 770000    | 11.08  |
| Q9D0T1 | NHP2-like protein 1 OS=Mus musculus GN=Snu13 PE=1 SV=4                              | 9.375     | 1 | 1  | 1 | 14.165 | 8.46  |          |          | 1600000   | 2.77   |
| Q91VR7 | Microtubule-associated proteins 1A/1B light chain 3A OS=Mus musculus GN=Map1lc3a P  | 23.140496 | 3 | 7  | 3 | 14.263 | 8.68  | 6800000  | 5000000  | 8700000   | 15.61  |
| Q9D023 | Mitochondrial pyruvate carrier 2 OS=Mus musculus GN=Mpc2 PE=1 SV=1                  | 5.511811  | 1 | 3  | 1 | 14.277 | 10.61 | 4400000  | 1600000  | 3500000   | 6.35   |
| P11031 | Activated RNA polymerase II transcriptional coactivator p15 OS=Mus musculus GN=Sub1 | 20.472441 | 3 | 6  | 3 | 14.418 | 9.6   | 23000000 | 9300000  | 22000000  | 16.41  |
| P62900 | 60S ribosomal protein L31 OS=Mus musculus GN=Rpl31 PE=1 SV=1                        | 13.6      | 2 | 5  | 2 | 14.454 | 10.54 | 17000000 | 9300000  | 15000000  | 11.90  |
| O55042 | Alpha-synuclein OS=Mus musculus GN=Snca PE=1 SV=2                                   | 41.428571 | 4 | 13 | 3 | 14.476 | 4.77  | 2000000  | 2600000  | 2900000   | 42.91  |
| Q6ZWW7 | 60S ribosomal protein L35 OS=Mus musculus GN=Rpl35 PE=1 SV=1                        | 8.1300813 | 1 | 3  | 1 | 14.544 | 11.05 | 15000000 | 9800000  | 9600000   | 8.87   |
| Q9WUC3 | Lymphocyte antigen 6H OS=Mus musculus GN=Ly6h PE=1 SV=2                             | 22.302158 | 3 | 12 | 3 | 14.659 | 7.53  | 50000000 | 40000000 | 49000000  | 34.50  |

|        |                                                                                      |   |           |   |    |   |        |       |           |           |           |       |
|--------|--------------------------------------------------------------------------------------|---|-----------|---|----|---|--------|-------|-----------|-----------|-----------|-------|
| P67984 | 60S ribosomal protein L22 OS=Mus musculus GN=Rpl22 PE=1 SV=2                         |   | 18.75     | 2 | 4  | 2 | 14.75  | 9.19  |           | 7200000   | 11000000  | 11.11 |
| P62245 | 40S ribosomal protein S15a OS=Mus musculus GN=Rps15a PE=1 SV=2                       |   | 10.769231 | 1 | 3  | 1 | 14.83  | 10.13 | 18000000  | 6200000   | 9400000   | 12.42 |
| P62830 | 60S ribosomal protein L23 OS=Mus musculus GN=Rpl23 PE=1 SV=1                         |   | 12.857143 | 2 | 4  | 2 | 14.856 | 10.51 | 6900000   | 5400000   | 7100000   | 8.97  |
| Q9D8B4 | NADH dehydrogenase [ubiquinone] 1 alpha subcomplex subunit 11 OS=Mus musculus G      |   | 36.170213 | 4 | 8  | 4 | 14.972 | 8.35  | 11000000  | 3200000   | 6700000   | 23.53 |
| Q9JKC6 | Cell cycle exit and neuronal differentiation protein 1 OS=Mus musculus GN=Cend1 PE=1 |   | 19.463087 | 2 | 18 | 2 | 14.978 | 8.97  | 16000000  | 8100000   | 16000000  | 59.25 |
| Q0VBF8 | Protein stum homolog OS=Mus musculus PE=1 SV=1                                       |   | 17.730496 | 2 | 4  | 2 | 14.995 | 7.21  | 3100000   | 2300000   | 1800000   | 13.46 |
| Q9JJV2 | Profilin-2 OS=Mus musculus GN=Pfn2 PE=1 SV=3                                         |   | 30.714286 | 3 | 12 | 3 | 15.022 | 6.99  | 9700000   | 7600000   | 9800000   | 33.58 |
| P02584 | SWISS-PROT:P02584 (Bos taurus) Profilin-1                                            | x | 8.5714286 | 1 | 1  | 1 | 15.048 | 8.28  | 1900000   |           |           | 2.29  |
| P01942 | Hemoglobin subunit alpha OS=Mus musculus GN=Hba PE=1 SV=2                            |   | 35.211268 | 4 | 12 | 4 | 15.076 | 8.22  | 28000000  | 3600000   | 24000000  | 37.95 |
| P63040 | Complexin-1 OS=Mus musculus GN=Cplx1 PE=1 SV=1                                       |   | 14.925373 | 1 | 4  | 1 | 15.112 | 4.97  | 3400000   | 1800000   | 3900000   | 17.22 |
| P56395 | Cytochrome b5 OS=Mus musculus GN=Cyb5a PE=1 SV=2                                     |   | 25.373134 | 2 | 4  | 2 | 15.232 | 5.07  | 4800000   |           | 6100000   | 13.17 |
| Q9CQN7 | 39S ribosomal protein L41, mitochondrial OS=Mus musculus GN=Mrlp41 PE=1 SV=1         |   | 9.6296296 | 1 | 1  | 1 | 15.252 | 9.82  |           |           | 6600000   | 1.96  |
| Q9CQZ5 | NADH dehydrogenase [ubiquinone] 1 alpha subcomplex subunit 6 OS=Mus musculus GN      |   | 25.19084  | 3 | 5  | 3 | 15.273 | 10.11 | 6900000   | 980000    | 3900000   | 11.29 |
| P02301 | Histone H3.3C OS=Mus musculus GN=H3f3c PE=3 SV=3                                     |   | 19.117647 | 4 | 18 | 4 | 15.305 | 11.14 | 350000000 | 160000000 | 230000000 | 39.81 |
| Q6RUT7 | Protein CCSMST1 OS=Mus musculus GN=Ccsmst1 PE=1 SV=1                                 |   | 18.382353 | 1 | 1  | 1 | 15.339 | 4.93  |           |           |           | 2.92  |
| Q8CFV4 | Neuritin OS=Mus musculus GN=Nrn1 PE=1 SV=1                                           |   | 16.197183 | 2 | 8  | 2 | 15.343 | 6.99  | 12000000  | 6200000   | 14000000  | 24.54 |
| P84086 | Complexin-2 OS=Mus musculus GN=Cplx2 PE=1 SV=1                                       |   | 28.358209 | 2 | 11 | 2 | 15.385 | 5.08  | 8500000   | 6800000   | 12000000  | 39.06 |
| P62849 | 40S ribosomal protein S24 OS=Mus musculus GN=Rps24 PE=1 SV=1                         |   | 19.548872 | 2 | 6  | 2 | 15.413 | 10.78 | 3400000   | 2100000   | 2300000   | 16.49 |
| P63276 | 40S ribosomal protein S17 OS=Mus musculus GN=Rps17 PE=1 SV=2                         |   | 17.037037 | 2 | 4  | 2 | 15.514 | 9.85  |           | 910000    | 1100000   | 12.00 |
| Q8VEA4 | Mitochondrial intermembrane space import and assembly protein 40 OS=Mus musculus G   |   | 20.143885 | 1 | 1  | 1 | 15.515 | 4.32  |           | 3300000   |           | 2.59  |
| Q9CPQ3 | Mitochondrial import receptor subunit TOM22 homolog OS=Mus musculus GN=Tomm22 I      |   | 30.28169  | 3 | 8  | 3 | 15.527 | 4.34  | 2400000   | 1900000   | 3100000   | 26.51 |
| P41105 | 60S ribosomal protein L28 OS=Mus musculus GN=Rpl28 PE=1 SV=2                         |   | 16.058394 | 2 | 7  | 2 | 15.724 | 12.02 | 21000000  | 12000000  | 14000000  | 18.48 |
| Q62266 | Cornifin-A OS=Mus musculus GN=Sprr1a PE=1 SV=1                                       |   | 16.666667 | 1 | 3  | 1 | 15.755 | 7.85  |           | 1200000   | 7000000   | 6.29  |
| P61358 | 60S ribosomal protein L27 OS=Mus musculus GN=Rpl27 PE=1 SV=2                         |   | 27.941176 | 3 | 6  | 3 | 15.788 | 10.56 | 13000000  | 5800000   | 16000000  | 14.30 |
| P62267 | 40S ribosomal protein S23 OS=Mus musculus GN=Rps23 PE=1 SV=3                         |   | 7.6923077 | 1 | 2  | 1 | 15.798 | 10.49 | 2000000   | 570000    |           | 3.90  |
| Q9D6K5 | Synaptojanin-2-binding protein OS=Mus musculus GN=Synj2bp PE=1 SV=1                  |   | 15.172414 | 2 | 5  | 2 | 15.805 | 6.3   | 1400000   | 1400000   | 1500000   | 15.01 |
| Q7M750 | Opalin OS=Mus musculus GN=Opalin PE=1 SV=1                                           |   | 6.993007  | 1 | 1  | 1 | 15.823 | 4.88  |           |           | 260000    | 2.05  |
| P02088 | Hemoglobin subunit beta-1 OS=Mus musculus GN=Hbb-b1 PE=1 SV=2                        |   | 53.741497 | 6 | 17 | 6 | 15.83  | 7.65  | 23000000  | 7800000   | 22000000  | 53.16 |
| P62911 | 60S ribosomal protein L32 OS=Mus musculus GN=Rpl32 PE=1 SV=2                         |   | 27.407407 | 3 | 6  | 3 | 15.85  | 11.33 | 820000    | 680000    | 3000000   | 15.31 |
| Q9CQI6 | Coactosin-like protein OS=Mus musculus GN=Cotl1 PE=1 SV=3                            |   | 5.6338028 | 1 | 3  | 1 | 15.934 | 5.4   | 470000    | 920000    | 1800000   | 7.06  |
| Q9CZX8 | 40S ribosomal protein S19 OS=Mus musculus GN=Rps19 PE=1 SV=3                         |   | 37.241379 | 5 | 12 | 5 | 16.076 | 10.4  | 13000000  | 15000000  | 17000000  | 30.82 |
| P12787 | Cytochrome c oxidase subunit 5A, mitochondrial OS=Mus musculus GN=Cox5a PE=1 SV      |   | 21.232877 | 3 | 8  | 3 | 16.091 | 6.54  | 8500000   | 9900000   | 11000000  | 23.95 |
| P62264 | 40S ribosomal protein S14 OS=Mus musculus GN=Rps14 PE=1 SV=3                         |   | 31.788079 | 5 | 15 | 5 | 16.263 | 10.05 | 18000000  | 11000000  | 14000000  | 53.50 |
| Q9CPW4 | Actin-related protein 2/3 complex subunit 5 OS=Mus musculus GN=Arpc5 PE=1 SV=3       |   | 22.516556 | 2 | 5  | 2 | 16.278 | 5.67  | 1600000   | 950000    | 3400000   | 16.61 |
| Q9CQX2 | Cytochrome b5 type B OS=Mus musculus GN=Cyb5b PE=1 SV=1                              |   | 44.520548 | 4 | 7  | 4 | 16.308 | 4.89  | 4900000   | 6100000   | 3700000   | 28.93 |
| Q9CR61 | NADH dehydrogenase [ubiquinone] 1 beta subcomplex subunit 7 OS=Mus musculus GN=      |   | 58.394161 | 7 | 17 | 7 | 16.32  | 8.18  | 28000000  | 27000000  | 24000000  | 52.04 |
| O70480 | Vesicle-associated membrane protein 4 OS=Mus musculus GN=Vamp4 PE=1 SV=1             |   | 9.929078  | 1 | 2  | 1 | 16.343 | 7.36  | 2000000   |           | 1100000   | 6.69  |
| Q9CZY3 | Ubiquitin-conjugating enzyme E2 variant 1 OS=Mus musculus GN=Ube2v1 PE=1 SV=1        |   | 17.687075 | 2 | 4  | 2 | 16.344 | 7.96  | 6000000   | 760000    | 1700000   | 12.67 |
| P14131 | 40S ribosomal protein S16 OS=Mus musculus GN=Rps16 PE=1 SV=4                         |   | 12.328767 | 2 | 4  | 2 | 16.435 | 10.21 | 3100000   | 1600000   | 2800000   | 9.62  |
| Q60872 | Eukaryotic translation initiation factor 1A OS=Mus musculus GN=Eif1a PE=2 SV=3       |   | 7.6388889 | 1 | 3  | 1 | 16.492 | 5.24  | 8800000   | 3200000   | 6600000   | 10.03 |
| Q9D6K8 | FUN14 domain-containing protein 2 OS=Mus musculus GN=Fundc2 PE=1 SV=1                |   | 7.9470199 | 1 | 1  | 1 | 16.554 | 9.7   | 3700000   |           |           | 2.40  |
| P14115 | 60S ribosomal protein L27a OS=Mus musculus GN=Rpl27a PE=1 SV=5                       |   | 22.297297 | 3 | 8  | 3 | 16.595 | 11.12 | 11000000  | 5300000   | 6500000   | 21.44 |
| Q9CQI3 | Glia maturation factor beta OS=Mus musculus GN=Gmfb PE=1 SV=3                        |   | 7.7464789 | 1 | 1  | 1 | 16.712 | 5.16  |           | 890000    |           | 2.65  |
| P62204 | Calmodulin OS=Mus musculus GN=Calm1 PE=1 SV=2                                        |   | 50.33557  | 8 | 36 | 8 | 16.827 | 4.22  | 120000000 | 130000000 | 120000000 | 89.27 |
| Q9ERS2 | NADH dehydrogenase [ubiquinone] 1 alpha subcomplex subunit 13 OS=Mus musculus G      |   | 38.888889 | 5 | 19 | 5 | 16.849 | 9.48  | 16000000  | 7700000   | 14000000  | 52.79 |
| Q9D8W7 | OCIA domain-containing protein 2 OS=Mus musculus GN=Ociad2 PE=1 SV=1                 |   | 11.038961 | 2 | 3  | 2 | 16.915 | 9.41  |           | 870000    | 1500000   | 6.94  |
| Q60605 | Myosin light polypeptide 6 OS=Mus musculus GN=MyI6 PE=1 SV=3                         |   | 30.463576 | 4 | 10 | 4 | 16.919 | 4.65  | 4700000   | 3800000   | 3600000   | 27.79 |
| Q9CPU4 | Microsomal glutathione S-transferase 3 OS=Mus musculus GN=Mgst3 PE=1 SV=1            |   | 23.529412 | 2 | 6  | 2 | 16.947 | 9.5   | 3500000   | 1800000   | 2400000   | 17.68 |

|        |                                                                                        |            |   |    |   |        |       |          |          |          |        |
|--------|----------------------------------------------------------------------------------------|------------|---|----|---|--------|-------|----------|----------|----------|--------|
| Q9D898 | Actin-related protein 2/3 complex subunit 5-like protein OS=Mus musculus GN=Arpc5l PE= | 32.679739  | 3 | 7  | 3 | 16.97  | 6.8   | 5100000  | 3200000  | 5200000  | 21.54  |
| Q9CQ92 | Mitochondrial fission 1 protein OS=Mus musculus GN=Fis1 PE=1 SV=1                      | 23.684211  | 3 | 7  | 3 | 16.998 | 8.53  | 8000000  | 3700000  | 8100000  | 20.54  |
| P62743 | AP-2 complex subunit sigma OS=Mus musculus GN=Ap2s1 PE=1 SV=1                          | 28.169014  | 4 | 12 | 4 | 17.007 | 6.18  | 20000000 | 13000000 | 17000000 | 27.50  |
| Q7TMF3 | NADH dehydrogenase [ubiquinone] 1 alpha subcomplex subunit 12 OS=Mus musculus G        | 54.482759  | 7 | 24 | 7 | 17.076 | 9.36  | 10000000 | 6400000  | 10000000 | 73.33  |
| P61327 | Protein mago nashi homolog OS=Mus musculus GN=Magoh PE=2 SV=1                          | 7.5342466  | 1 | 2  | 1 | 17.153 | 6.11  | 2800000  |          | 2800000  | 5.42   |
| P15532 | Nucleoside diphosphate kinase A OS=Mus musculus GN=Nme1 PE=1 SV=1                      | 6.5789474  | 1 | 2  | 1 | 17.197 | 7.37  | 7700000  | 4900000  |          | 4.92   |
| P62301 | 40S ribosomal protein S13 OS=Mus musculus GN=Rps13 PE=1 SV=2                           | 16.556291  | 2 | 6  | 2 | 17.212 | 10.54 | 3300000  | 2400000  | 2400000  | 16.27  |
| Q9CRB2 | H/ACA ribonucleoprotein complex subunit 2 OS=Mus musculus GN=Nhp2 PE=1 SV=1            | 11.1111111 | 1 | 3  | 1 | 17.236 | 8.41  | 620000   | 240000   | 760000   | 9.57   |
| P61255 | 60S ribosomal protein L26 OS=Mus musculus GN=Rpl26 PE=1 SV=1                           | 16.551724  | 3 | 5  | 3 | 17.248 | 10.55 | 13000000 | 6400000  |          | 10.91  |
| Q9CQH7 | Transcription factor BTF3 homolog 4 OS=Mus musculus GN=Btf3l4 PE=1 SV=1                | 24.050633  | 2 | 8  | 2 | 17.26  | 6.35  | 5400000  | 2600000  | 5700000  | 27.38  |
| P54227 | Stathmin OS=Mus musculus GN=Stmn1 PE=1 SV=2                                            | 20.805369  | 3 | 11 | 3 | 17.264 | 5.97  | 15000000 | 8900000  | 13000000 | 25.08  |
| Q9CYR0 | Single-stranded DNA-binding protein, mitochondrial OS=Mus musculus GN=Ssbp1 PE=1       | 9.8684211  | 1 | 1  | 1 | 17.308 | 9.92  |          | 620000   |          | 3.24   |
| Q01768 | Nucleoside diphosphate kinase B OS=Mus musculus GN=Nme2 PE=1 SV=1                      | 9.2105263  | 1 | 3  | 1 | 17.352 | 7.5   | 4700000  | 2300000  | 3500000  | 9.07   |
| Q9CR21 | Acyl carrier protein, mitochondrial OS=Mus musculus GN=Ndufab1 PE=1 SV=1               | 8.974359   | 1 | 2  | 1 | 17.359 | 5.21  |          | 1200000  | 1000000  | 5.22   |
| Q9D6G9 | CKLF-like MARVEL transmembrane domain-containing protein 5 OS=Mus musculus GN=         | 12.1179487 | 1 | 2  | 1 | 17.378 | 4.84  | 4300000  |          | 3400000  | 9.28   |
| O09111 | NADH dehydrogenase [ubiquinone] 1 beta subcomplex subunit 11, mitochondrial OS=Mus     | 46.357616  | 6 | 36 | 6 | 17.433 | 5.22  | 17000000 | 15000000 | 29000000 | 125.30 |
| Q9QYK7 | RING finger protein 11 OS=Mus musculus GN=Rnf11 PE=1 SV=1                              | 7.7922078  | 1 | 1  | 1 | 17.446 | 4.78  |          | 860000   |          | 2.56   |
| Q9D3D9 | ATP synthase subunit delta, mitochondrial OS=Mus musculus GN=Atp5d PE=1 SV=1           | 13.690476  | 2 | 5  | 2 | 17.589 | 5.08  | 4000000  | 5300000  | 5200000  | 15.66  |
| P62751 | 60S ribosomal protein L23a OS=Mus musculus GN=Rpl23a PE=1 SV=1                         | 20.512821  | 3 | 12 | 3 | 17.684 | 10.45 | 34000000 | 18000000 | 22000000 | 33.56  |
| P62270 | 40S ribosomal protein S18 OS=Mus musculus GN=Rps18 PE=1 SV=3                           | 19.078947  | 3 | 8  | 3 | 17.708 | 10.99 | 9600000  | 6400000  | 10000000 | 21.87  |
| Q8BP67 | 60S ribosomal protein L24 OS=Mus musculus GN=Rpl24 PE=1 SV=2                           | 8.2802548  | 1 | 4  | 1 | 17.768 | 11.25 | 2400000  | 1700000  | 1700000  | 11.75  |
| P35979 | 60S ribosomal protein L12 OS=Mus musculus GN=Rpl12 PE=1 SV=2                           | 45.454545  | 5 | 13 | 5 | 17.794 | 9.42  | 9700000  | 4600000  | 6600000  | 45.79  |
| Q9ERR7 | 15 kDa selenoprotein OS=Mus musculus GN=Sep15 PE=1 SV=3                                | 17.283951  | 2 | 5  | 2 | 17.796 | 5.35  | 560000   | 550000   | 470000   | 13.25  |
| P62983 | Ubiquitin-40S ribosomal protein S27a OS=Mus musculus GN=Rps27a PE=1 SV=2               | 25.641026  | 4 | 19 | 4 | 17.939 | 9.64  | 7400000  | 14000000 | 17000000 | 61.02  |
| P17742 | Peptidyl-prolyl cis-trans isomerase A OS=Mus musculus GN=Ppia PE=1 SV=2                | 30.487805  | 5 | 21 | 5 | 17.96  | 7.9   | 44000000 | 20000000 | 38000000 | 55.72  |
| P01831 | Thy-1 membrane glycoprotein OS=Mus musculus GN=Thy1 PE=1 SV=1                          | 37.654321  | 6 | 27 | 6 | 18.069 | 8.97  | 71000000 | 56000000 | 66000000 | 85.08  |
| Q9D958 | Signal peptidase complex subunit 1 OS=Mus musculus GN=Spcs1 PE=2 SV=3                  | 7.4534161  | 1 | 1  | 1 | 18.174 | 10.01 | 3400000  |          |          | 2.15   |
| Q9CRB8 | Mitochondrial fission process protein 1 OS=Mus musculus GN=Mtfp1 PE=1 SV=1             | 6.626506   | 1 | 1  | 1 | 18.303 | 8.68  |          | 420000   |          | 2.09   |
| Q9QUR7 | Peptidyl-prolyl cis-trans isomerase NIMA-interacting 1 OS=Mus musculus GN=Pin1 PE=1    | 20         | 2 | 4  | 2 | 18.359 | 8.79  | 1300000  | 1400000  | 3200000  | 13.18  |
| P62281 | 40S ribosomal protein S11 OS=Mus musculus GN=Rps11 PE=1 SV=3                           | 25.949367  | 5 | 10 | 5 | 18.419 | 10.3  | 11000000 | 7000000  | 11000000 | 22.95  |
| Q9D328 | Transmembrane protein 35 OS=Mus musculus GN=Tmem35 PE=1 SV=1                           | 8.9820359  | 1 | 4  | 1 | 18.493 | 9.99  | 6700000  | 2000000  | 4000000  | 10.88  |
| Q9R0P5 | Dextrin OS=Mus musculus GN=Dstn PE=1 SV=3                                              | 19.393939  | 3 | 12 | 3 | 18.509 | 7.97  | 6000000  | 2300000  | 6700000  | 36.20  |
| P18760 | Cofilin-1 OS=Mus musculus GN=Cfl1 PE=1 SV=3                                            | 57.831325  | 9 | 25 | 8 | 18.548 | 8.09  | 22000000 | 15000000 | 47000000 | 89.82  |
| Q64327 | Male-enhanced antigen 1 OS=Mus musculus GN=Mea1 PE=1 SV=1                              | 7.4712644  | 1 | 2  | 1 | 18.573 | 4.08  | 590000   | 830000   |          | 5.11   |
| P60824 | Cold-inducible RNA-binding protein OS=Mus musculus GN=Cirbp PE=1 SV=1                  | 12.790698  | 2 | 3  | 2 | 18.596 | 9.61  | 3300000  | 1700000  | 2100000  | 6.21   |
| Q5M8N0 | CB1 cannabinoid receptor-interacting protein 1 OS=Mus musculus GN=Cnrip1 PE=1 SV=      | 9.7560976  | 1 | 1  | 1 | 18.601 | 7.96  |          | 1200000  |          | 3.72   |
| Q9WTX5 | S-phase kinase-associated protein 1 OS=Mus musculus GN=Skp1 PE=1 SV=3                  | 21.472393  | 5 | 13 | 5 | 18.66  | 4.54  | 11000000 | 9900000  | 13000000 | 39.00  |
| P45591 | Cofilin-2 OS=Mus musculus GN=Cfl2 PE=1 SV=1                                            | 36.746988  | 5 | 8  | 4 | 18.698 | 7.88  | 1700000  |          | 2600000  | 23.29  |
| Q9R0Q7 | Prostaglandin E synthase 3 OS=Mus musculus GN=Ptges3 PE=1 SV=1                         | 23.75      | 3 | 8  | 3 | 18.709 | 4.55  | 6800000  | 4000000  | 6700000  | 23.91  |
| P61967 | AP-1 complex subunit sigma-1A OS=Mus musculus GN=Ap1s1 PE=1 SV=1                       | 10.126582  | 1 | 4  | 1 | 18.721 | 5.73  | 5800000  | 2500000  | 3800000  | 16.81  |
| Q9DCX2 | ATP synthase subunit d, mitochondrial OS=Mus musculus GN=Atp5h PE=1 SV=3               | 31.055901  | 5 | 11 | 5 | 18.738 | 5.69  | 27000000 | 15000000 | 22000000 | 29.18  |
| O70492 | Sorting nexin-3 OS=Mus musculus GN=Snx3 PE=1 SV=3                                      | 17.901235  | 3 | 7  | 3 | 18.746 | 8.66  | 2100000  | 1300000  | 2500000  | 18.56  |
| P63325 | 40S ribosomal protein S10 OS=Mus musculus GN=Rps10 PE=1 SV=1                           | 8.4848485  | 1 | 3  | 1 | 18.904 | 10.15 | 7300000  | 4200000  | 4400000  | 11.11  |
| Q9DB50 | AP-1 complex subunit sigma-2 OS=Mus musculus GN=Ap1s2 PE=1 SV=1                        | 8.125      | 1 | 1  | 1 | 18.917 | 5.48  |          | 490000   |          | 2.80   |
| Q62186 | Translocon-associated protein subunit delta OS=Mus musculus GN=Ssr4 PE=1 SV=1          | 25         | 3 | 6  | 3 | 18.924 | 5.78  | 2900000  | 1800000  | 1700000  | 19.47  |
| P97457 | Myosin regulatory light chain 2, skeletal muscle isoform OS=Mus musculus GN=Mylp1 PE=  | 7.6923077  | 1 | 1  | 1 | 18.943 | 4.92  |          | 450000   |          | 2.70   |
| Q8C1M2 | Zinc finger protein 428 OS=Mus musculus GN=Znf428 PE=1 SV=1                            | 6.25       | 1 | 2  | 1 | 18.991 | 4.23  | 460000   |          | 470000   | 4.00   |
| O70493 | Sorting nexin-12 OS=Mus musculus GN=Snx12 PE=1 SV=1                                    | 15.151515  | 2 | 4  | 2 | 19.104 | 7.34  | 1600000  | 760000   | 1500000  | 9.04   |

|        |                                                                                      |           |   |    |   |        |       |          |          |          |       |
|--------|--------------------------------------------------------------------------------------|-----------|---|----|---|--------|-------|----------|----------|----------|-------|
| Q9D2P8 | Myelin-associated oligodendrocyte basic protein OS=Mus musculus GN=Mobp PE=1 SV=     | 6.4705882 | 1 | 2  | 1 | 19.185 | 11.14 |          | 540000   | 3000000  | 4.48  |
| Q63810 | Calceurin subunit B type 1 OS=Mus musculus GN=Ppp3r1 PE=1 SV=3                       | 22.352941 | 3 | 10 | 3 | 19.288 | 4.81  | 34000000 | 32000000 | 44000000 | 32.14 |
| P84104 | Serine/arginine-rich splicing factor 3 OS=Mus musculus GN=Srsf3 PE=1 SV=1            | 25        | 4 | 10 | 3 | 19.318 | 11.65 | 9100000  |          | 6500000  | 27.94 |
| Q9CZH7 | Matrix-remodeling-associated protein 7 OS=Mus musculus GN=Mxra7 PE=1 SV=2            | 31.460674 | 2 | 5  | 2 | 19.445 | 4.26  | 880000   | 500000   | 1200000  | 16.80 |
| P63028 | Translationally-controlled tumor protein OS=Mus musculus GN=Tpt1 PE=1 SV=1           | 15.697674 | 2 | 7  | 2 | 19.45  | 4.86  | 9000000  | 5400000  | 9100000  | 26.77 |
| Q9JIG8 | PRA1 family protein 2 OS=Mus musculus GN=Praf2 PE=1 SV=1                             | 10.11236  | 2 | 3  | 2 | 19.466 | 9.6   | 5600000  |          | 3200000  | 7.58  |
| P19783 | Cytochrome c oxidase subunit 4 isoform 1, mitochondrial OS=Mus musculus GN=Cox4i1    | 36.686391 | 7 | 27 | 7 | 19.518 | 9.23  | 41000000 | 28000000 | 46000000 | 75.83 |
| Q9D938 | Transmembrane protein 160 OS=Mus musculus GN=Tmem160 PE=2 SV=1                       | 6.9148936 | 1 | 2  | 1 | 19.575 | 7.3   |          | 2100000  | 2000000  | 5.20  |
| Q59J78 | Mimitin, mitochondrial OS=Mus musculus GN=Ndufaf2 PE=1 SV=1                          | 9.5238095 | 1 | 3  | 1 | 19.616 | 8.25  | 2900000  | 2600000  | 3400000  | 9.78  |
| Q99LW6 | YY1-associated factor 2 OS=Mus musculus GN=Yaf2 PE=1 SV=1                            | 13.407821 | 1 | 1  | 1 | 19.643 | 9.58  | 52000    |          |          | 2.13  |
| P59999 | Actin-related protein 2/3 complex subunit 4 OS=Mus musculus GN=Arpc4 PE=1 SV=3       | 16.071429 | 3 | 9  | 3 | 19.654 | 8.43  | 8900000  | 6600000  | 8600000  | 20.98 |
| Q3THE2 | Myosin regulatory light chain 12B OS=Mus musculus GN=Myl12b PE=1 SV=2                | 24.418605 | 4 | 13 | 4 | 19.767 | 4.84  | 11000000 | 7800000  | 12000000 | 37.77 |
| Q9CXZ1 | NADH dehydrogenase [ubiquinone] iron-sulfur protein 4, mitochondrial OS=Mus musculus | 25.142857 | 4 | 10 | 4 | 19.772 | 9.99  | 30000000 | 17000000 | 23000000 | 29.08 |
| Q63739 | Protein tyrosine phosphatase type IVA 1 OS=Mus musculus GN=Ptp4a1 PE=1 SV=1          | 4.0462428 | 1 | 1  | 1 | 19.802 | 8.97  |          | 900000   |          | 2.43  |
| Q9CWX3 | RNA-binding protein 8A OS=Mus musculus GN=Rbm8a PE=1 SV=3                            | 21.83908  | 3 | 9  | 3 | 19.876 | 6.16  | 7300000  | 240000   | 6300000  | 29.89 |
| Q9DCJ5 | NADH dehydrogenase [ubiquinone] 1 alpha subcomplex subunit 8 OS=Mus musculus GN      | 19.767442 | 3 | 10 | 3 | 19.979 | 8.46  | 9000000  | 7000000  | 8200000  | 32.22 |
| Q99LX0 | Protein deglycase DJ-1 OS=Mus musculus GN=Park7 PE=1 SV=1                            | 7.4074074 | 1 | 2  | 1 | 20.008 | 6.77  |          | 710000   |          | 4.84  |
| Q9R0P4 | Small acidic protein OS=Mus musculus GN=Smap PE=1 SV=1                               | 8.839779  | 1 | 5  | 1 | 20.034 | 4.82  |          |          | 2000000  | 15.98 |
| P62331 | ADP-ribosylation factor 6 OS=Mus musculus GN=Arf6 PE=1 SV=2                          | 6.2857143 | 1 | 2  | 1 | 20.069 | 8.95  |          | 1900000  | 3900000  | 4.38  |
| Q9CZX9 | ER membrane protein complex subunit 4 OS=Mus musculus GN=Emc4 PE=1 SV=1              | 8.7431694 | 1 | 1  | 1 | 20.103 | 8.62  | 1400000  |          |          | 2.95  |
| Q9QZB9 | Dynactin subunit 5 OS=Mus musculus GN=Dctn5 PE=1 SV=1                                | 6.043956  | 1 | 4  | 1 | 20.127 | 8.02  | 1700000  | 1400000  | 2300000  | 8.78  |
| Q8R2U6 | Diphosphoinositol polyphosphate phosphohydrolase 2 OS=Mus musculus GN=Nudt4 PE=      | 5.027933  | 1 | 1  | 1 | 20.143 | 6.35  | 160000   |          |          | 2.15  |
| P28667 | MARCKS-related protein OS=Mus musculus GN=Marcks1 PE=1 SV=2                          | 65        | 5 | 11 | 5 | 20.153 | 4.61  | 3900000  | 1900000  | 3200000  | 38.51 |
| P61924 | Coatomer subunit zeta-1 OS=Mus musculus GN=Copz1 PE=1 SV=1                           | 8.4745763 | 1 | 2  | 1 | 20.185 | 4.81  |          | 590000   | 350000   | 5.31  |
| Q9CXW4 | 60S ribosomal protein L11 OS=Mus musculus GN=Rpl11 PE=1 SV=4                         | 16.853933 | 3 | 5  | 3 | 20.24  | 9.6   |          | 5500000  | 6200000  | 11.36 |
| O55013 | Trafficking protein particle complex subunit 3 OS=Mus musculus GN=Trappc3 PE=1 SV=   | 10        | 2 | 2  | 2 | 20.289 | 4.96  |          |          | 850000   | 3.99  |
| Q8VE22 | 28S ribosomal protein S23, mitochondrial OS=Mus musculus GN=Mrps23 PE=1 SV=1         | 7.9096045 | 1 | 2  | 1 | 20.335 | 8.59  |          | 800000   | 900000   | 3.87  |
| Q9CXI5 | Mesencephalic astrocyte-derived neurotrophic factor OS=Mus musculus GN=Manf PE=1     | 7.8212291 | 1 | 1  | 1 | 20.361 | 8.07  |          | 400000   |          | 2.20  |
| P61750 | ADP-ribosylation factor 4 OS=Mus musculus GN=Arf4 PE=1 SV=2                          | 11.666667 | 2 | 4  | 1 | 20.384 | 7.14  | 2200000  | 950000   | 2800000  | 9.72  |
| P61211 | ADP-ribosylation factor-like protein 1 OS=Mus musculus GN=Ar11 PE=1 SV=1             | 7.7348066 | 1 | 2  | 1 | 20.398 | 5.72  | 1500000  |          | 1200000  | 7.04  |
| Q9QZ88 | Vacuolar protein sorting-associated protein 29 OS=Mus musculus GN=Vps29 PE=1 SV=1    | 10.989011 | 2 | 3  | 2 | 20.483 | 6.79  | 11000000 |          | 16000000 | 7.16  |
| P61226 | Ras-related protein Rap-2b OS=Mus musculus GN=Rap2b PE=1 SV=1                        | 31.147541 | 6 | 17 | 3 | 20.491 | 4.81  | 2800000  | 2500000  | 2900000  | 47.70 |
| Q9JM76 | Actin-related protein 2/3 complex subunit 3 OS=Mus musculus GN=Arpc3 PE=1 SV=3       | 7.3033708 | 1 | 4  | 1 | 20.511 | 8.59  | 5800000  | 1700000  | 4800000  | 15.21 |
| P84084 | ADP-ribosylation factor 5 OS=Mus musculus GN=Arf5 PE=1 SV=2                          | 25.555556 | 4 | 10 | 2 | 20.517 | 6.79  | 6500000  | 2100000  | 3400000  | 27.92 |
| P97315 | Cysteine and glycine-rich protein 1 OS=Mus musculus GN=Csrp1 PE=1 SV=3               | 38.341969 | 5 | 12 | 5 | 20.57  | 8.57  | 7400000  | 3700000  | 6600000  | 39.20 |
| P61205 | ADP-ribosylation factor 3 OS=Mus musculus GN=Arf3 PE=2 SV=2                          | 32.044199 | 5 | 12 | 3 | 20.588 | 7.43  | 19000000 | 6500000  | 10000000 | 35.20 |
| Q3UHX2 | 28 kDa heat- and acid-stable phosphoprotein OS=Mus musculus GN=Pdap1 PE=1 SV=1       | 32.044199 | 4 | 13 | 4 | 20.593 | 7.39  | 4100000  | 1500000  | 4800000  | 45.57 |
| Q80ZJ1 | Ras-related protein Rap-2a OS=Mus musculus GN=Rap2a PE=1 SV=2                        | 26.229508 | 5 | 12 | 2 | 20.629 | 4.82  |          | 1400000  | 3400000  | 32.31 |
| P62717 | 60S ribosomal protein L18a OS=Mus musculus GN=Rpl18a PE=1 SV=1                       | 19.318182 | 3 | 5  | 3 | 20.719 | 10.71 | 3300000  | 1300000  | 2400000  | 12.95 |
| Q9JKL4 | NADH dehydrogenase [ubiquinone] 1 alpha subcomplex assembly factor 3 OS=Mus musc     | 5.9459459 | 1 | 2  | 1 | 20.721 | 8.05  |          | 1100000  | 1800000  | 4.21  |
| Q9QXT0 | Protein canopy homolog 2 OS=Mus musculus GN=Cnpy2 PE=1 SV=1                          | 6.5934066 | 1 | 1  | 1 | 20.754 | 5.07  |          |          | 520000   | 2.80  |
| Q99JL6 | Ras-related protein Rap-1b OS=Mus musculus GN=Rap1b PE=1 SV=2                        | 23.369565 | 5 | 9  | 1 | 20.812 | 5.78  | 1900000  | 1600000  | 1800000  | 23.07 |
| P23198 | Chromobox protein homolog 3 OS=Mus musculus GN=Cbx3 PE=1 SV=2                        | 13.661202 | 3 | 10 | 3 | 20.842 | 5.22  | 15000000 | 2700000  | 12000000 | 39.77 |
| P10922 | Histone H1.0 OS=Mus musculus GN=H1f0 PE=2 SV=4                                       | 16.494845 | 3 | 11 | 3 | 20.848 | 10.9  | 12000000 | 7700000  | 13000000 | 32.83 |
| Q8C8T8 | Pre-rRNA-processing protein TSR2 homolog OS=Mus musculus GN=Tsr2 PE=1 SV=1           | 15.183246 | 2 | 5  | 2 | 20.878 | 4.23  | 2600000  | 1200000  | 2600000  | 16.69 |
| P61082 | NEDD8-conjugating enzyme Ubc12 OS=Mus musculus GN=Ube2m PE=1 SV=1                    | 5.4644809 | 1 | 3  | 1 | 20.887 | 7.69  | 2200000  | 910000   | 1600000  | 8.34  |
| Q4QQM4 | Tumor protein p53-inducible protein 11 OS=Mus musculus GN=Trp53i11 PE=1 SV=1         | 13.227513 | 2 | 3  | 2 | 20.897 | 9.41  | 2900000  |          | 1500000  | 7.90  |
| Q62092 | Neuron-specific protein family member 1 OS=Mus musculus GN=Nsg1 PE=1 SV=3            | 5.9459459 | 1 | 1  | 1 | 20.916 | 6.21  |          |          | 390000   | 3.51  |

|         |                                                                                    |           |    |     |    |        |       |           |           |           |        |
|---------|------------------------------------------------------------------------------------|-----------|----|-----|----|--------|-------|-----------|-----------|-----------|--------|
| Q9Z0Y1  | Dynactin subunit 3 OS=Mus musculus GN=Dctn3 PE=1 SV=2                              | 4.3010753 | 1  | 1   | 1  | 20.965 | 6.06  |           | 790000    |           | 1.91   |
| P62835  | Ras-related protein Rap-1A OS=Mus musculus GN=Rap1a PE=1 SV=1                      | 23.369565 | 5  | 12  | 1  | 20.974 | 6.67  | 20000000  | 5000000   | 16000000  | 30.49  |
| Q8K4M5  | COMM domain-containing protein 1 OS=Mus musculus GN=Commd1 PE=1 SV=2               | 7.4468085 | 1  | 1   | 1  | 20.983 | 7.59  |           | 240000    |           | 2.41   |
| Q9DCS9  | NADH dehydrogenase [ubiquinone] 1 beta subcomplex subunit 10 OS=Mus musculus GN=   | 59.659091 | 9  | 30  | 9  | 21.01  | 8.03  | 12000000  | 14000000  | 15000000  | 89.22  |
| Q60870  | Receptor expression-enhancing protein 5 OS=Mus musculus GN=Reep5 PE=1 SV=1         | 10.27027  | 2  | 6   | 2  | 21.037 | 8.38  | 5400000   | 2800000   | 5800000   | 17.77  |
| Q9DCF9  | Translocon-associated protein subunit gamma OS=Mus musculus GN=Ssr3 PE=1 SV=1      | 7.5675676 | 1  | 1   | 1  | 21.051 | 9.61  |           | 1600000   |           | 2.74   |
| Q9R257  | Heme-binding protein 1 OS=Mus musculus GN=Hebp1 PE=1 SV=2                          | 4.2105263 | 1  | 1   | 1  | 21.053 | 5.26  |           | 120000    |           | 2.07   |
| O09114  | Prostaglandin-H2 D-isomerase OS=Mus musculus GN=Ptgds PE=1 SV=1                    | 8.994709  | 1  | 2   | 1  | 21.053 | 8.25  |           | 1600000   | 2700000   | 8.69   |
| P09528  | Ferritin heavy chain OS=Mus musculus GN=Fth1 PE=1 SV=2                             | 15.384615 | 2  | 3   | 2  | 21.053 | 5.88  | 1900000   |           | 1900000   | 8.23   |
| Q921L3  | Calcium load-activated calcium channel OS=Mus musculus GN=Tmco1 PE=1 SV=1          | 7.4468085 | 1  | 3   | 1  | 21.161 | 9.74  | 1100000   |           |           | 9.66   |
| P60766  | Cell division control protein 42 homolog OS=Mus musculus GN=Cdc42 PE=1 SV=2        | 31.413613 | 5  | 16  | 4  | 21.245 | 6.55  | 3600000   | 3300000   | 5400000   | 45.77  |
| Q61411  | GTPase Hras OS=Mus musculus GN=Hras PE=1 SV=2                                      | 25.925926 | 4  | 9   | 4  | 21.285 | 5.31  | 5200000   | 4400000   | 6800000   | 22.11  |
| P84096  | Rho-related GTP-binding protein RhoG OS=Mus musculus GN=Rhog PE=1 SV=1             | 23.560209 | 3  | 9   | 2  | 21.295 | 8.12  | 2000000   | 810000    | 2100000   | 28.62  |
| Q8BK08  | Transmembrane protein 11, mitochondrial OS=Mus musculus GN=Tmem11 PE=1 SV=1        | 4.7368421 | 1  | 2   | 1  | 21.298 | 7.36  | 5300000   |           | 4900000   | 4.04   |
| Q8VEH3  | ADP-ribosylation factor-like protein 8A OS=Mus musculus GN=Arl8a PE=1 SV=1         | 18.27957  | 3  | 8   | 2  | 21.376 | 7.77  | 8900000   | 2700000   | 7300000   | 20.70  |
| P83917  | Chromobox protein homolog 1 OS=Mus musculus GN=Cbx1 PE=1 SV=1                      | 15.135135 | 3  | 5   | 3  | 21.405 | 4.93  | 6200000   |           | 4800000   | 16.89  |
| Q9CPR4  | 60S ribosomal protein L17 OS=Mus musculus GN=Rpl17 PE=1 SV=3                       | 22.826087 | 4  | 7   | 4  | 21.409 | 10.18 | 11000000  | 4800000   | 3200000   | 16.56  |
| P63001  | Ras-related C3 botulinum toxin substrate 1 OS=Mus musculus GN=Rac1 PE=1 SV=1       | 29.6875   | 5  | 15  | 4  | 21.436 | 8.5   | 17000000  | 8000000   | 12000000  | 38.85  |
| O35988  | Syndecan-4 OS=Mus musculus GN=Sdc4 PE=1 SV=1                                       | 12.121212 | 2  | 4   | 2  | 21.469 | 4.41  | 6500000   | 4200000   | 4400000   | 13.21  |
| Q9CQW2  | ADP-ribosylation factor-like protein 8B OS=Mus musculus GN=Arl8b PE=1 SV=1         | 17.204301 | 3  | 9   | 2  | 21.525 | 8.43  | 9000000   | 5600000   | 12000000  | 22.24  |
| Q9D8Y1  | Transmembrane protein 126A OS=Mus musculus GN=Tmem126a PE=1 SV=1                   | 6.122449  | 1  | 1   | 1  | 21.526 | 9.41  | 1500000   |           |           | 2.09   |
| Q8R5J9  | PRA1 family protein 3 OS=Mus musculus GN=Arl6ip5 PE=1 SV=2                         | 5.8510638 | 1  | 3   | 1  | 21.543 | 9.61  | 11000000  | 3500000   | 8600000   | 9.04   |
| Q6P069  | Sorcin OS=Mus musculus GN=Sri PE=1 SV=1                                            | 5.5555556 | 1  | 2   | 1  | 21.613 | 5.59  |           | 1300000   | 640000    | 4.43   |
| P35980  | 60S ribosomal protein L18 OS=Mus musculus GN=Rpl18 PE=1 SV=3                       | 33.510638 | 6  | 15  | 6  | 21.631 | 11.78 | 22000000  | 11000000  | 10000000  | 44.84  |
| P32883  | GTPase KRas OS=Mus musculus GN=Kras PE=1 SV=1                                      | 17.989418 | 3  | 10  | 3  | 21.642 | 6.77  | 4000000   | 2300000   | 5500000   | 21.92  |
| O55022  | Membrane-associated progesterone receptor component 1 OS=Mus musculus GN=Pgrm      | 54.358974 | 8  | 26  | 7  | 21.681 | 4.7   | 9700000   | 13000000  | 13000000  | 97.64  |
| Q9DB15  | 39S ribosomal protein L12, mitochondrial OS=Mus musculus GN=Mrlp12 PE=1 SV=2       | 6.9651741 | 1  | 2   | 1  | 21.695 | 9.29  |           |           | 3700000   | 6.16   |
| Q9CQH3  | NADH dehydrogenase [ubiquinone] 1 beta subcomplex subunit 5, mitochondrial OS=Mus  | 21.164021 | 4  | 19  | 4  | 21.696 | 9.41  | 15000000  | 19000000  | 23000000  | 51.25  |
| Q9DCCR2 | AP-3 complex subunit sigma-1 OS=Mus musculus GN=Ap3s1 PE=1 SV=2                    | 7.7720207 | 1  | 3   | 1  | 21.718 | 5.39  |           | 1400000   | 1200000   | 7.50   |
| Q61171  | Peroxiredoxin-2 OS=Mus musculus GN=Prdx2 PE=1 SV=3                                 | 31.313131 | 5  | 9   | 5  | 21.765 | 5.41  | 3700000   | 4100000   | 7900000   | 24.31  |
| Q60829  | Protein phosphatase 1 regulatory subunit 1B OS=Mus musculus GN=Ppp1r1b PE=1 SV=    | 8.2474227 | 1  | 3   | 1  | 21.767 | 4.65  | 270000    |           | 1500000   | 11.48  |
| Q9QU10  | Transforming protein RhoA OS=Mus musculus GN=Rhoa PE=1 SV=1                        | 31.606218 | 6  | 15  | 4  | 21.768 | 6.1   | 11000000  | 4400000   | 9200000   | 41.93  |
| O88952  | Protein lin-7 homolog C OS=Mus musculus GN=Lin7c PE=1 SV=2                         | 32.48731  | 5  | 10  | 1  | 21.82  | 8.43  |           |           | 1700000   | 27.72  |
| P12815  | Programmed cell death protein 6 OS=Mus musculus GN=Pcdc6 PE=1 SV=2                 | 10.471204 | 2  | 2   | 2  | 21.854 | 5.4   |           | 1200000   |           | 5.72   |
| Q9D6J5  | NADH dehydrogenase [ubiquinone] 1 beta subcomplex subunit 8, mitochondrial OS=Mus  | 30.107527 | 4  | 8   | 4  | 21.862 | 6.64  | 2400000   | 8700000   | 8100000   | 19.84  |
| Q8BNY6  | Neuronal calcium sensor 1 OS=Mus musculus GN=Ncs1 PE=1 SV=3                        | 25.263158 | 4  | 9   | 4  | 21.865 | 4.83  | 3000000   | 3800000   | 4300000   | 24.09  |
| P51410  | 60S ribosomal protein L9 OS=Mus musculus GN=Rpl9 PE=2 SV=2                         | 5.2083333 | 1  | 3   | 1  | 21.868 | 9.95  | 14000000  | 6500000   | 8800000   | 7.86   |
| Q9D892  | Inosine triphosphate pyrophosphatase OS=Mus musculus GN=Itppa PE=1 SV=2            | 8.5858586 | 1  | 2   | 1  | 21.883 | 5.87  |           |           | 930000    | 5.89   |
| P99029  | Peroxiredoxin-5, mitochondrial OS=Mus musculus GN=Prdx5 PE=1 SV=2                  | 18.571429 | 3  | 4   | 3  | 21.884 | 8.85  | 13000000  | 1300000   | 21000000  | 12.37  |
| P43274  | Histone H1.4 OS=Mus musculus GN=Hist1h1e PE=1 SV=2                                 | 14.611872 | 3  | 6   | 1  | 21.964 | 11.11 | 28000000  | 23000000  | 25000000  | 16.77  |
| Q9CQJ8  | NADH dehydrogenase [ubiquinone] 1 beta subcomplex subunit 9 OS=Mus musculus GN=    | 29.608939 | 5  | 29  | 5  | 21.97  | 7.8   | 8500000   | 4100000   | 7900000   | 92.47  |
| Q8BSZ2  | AP-3 complex subunit sigma-2 OS=Mus musculus GN=Ap3s2 PE=1 SV=1                    | 5.1813472 | 1  | 1   | 1  | 22.003 | 5.22  |           | 760000    |           | 2.10   |
| Q64152  | Transcription factor BTF3 OS=Mus musculus GN=Btf3 PE=1 SV=3                        | 12.254902 | 1  | 2   | 1  | 22.017 | 9.52  | 1400000   |           | 1400000   | 7.09   |
| Q8CCT4  | Transcription elongation factor A protein-like 5 OS=Mus musculus GN=Tcea5 PE=1 SV= | 12        | 3  | 5   | 1  | 22.025 | 6.2   | 4400000   | 2000000   | 4500000   | 12.17  |
| Q91XV3  | Brain acid soluble protein 1 OS=Mus musculus GN=Basp1 PE=1 SV=3                    | 71.681416 | 11 | 131 | 11 | 22.074 | 4.51  | 430000000 | 430000000 | 400000000 | 497.31 |
| P43277  | Histone H1.3 OS=Mus musculus GN=Hist1h1d PE=1 SV=2                                 | 14.479638 | 3  | 6   | 1  | 22.086 | 11.03 | 13000000  | 15000000  | 13000000  | 15.54  |
| P60904  | DnaJ homolog subfamily C member 5 OS=Mus musculus GN=Dnajc5 PE=1 SV=1              | 44.949495 | 5  | 16  | 5  | 22.086 | 5.07  | 16000000  | 7100000   | 14000000  | 53.76  |
| Q60771  | Claudin-11 OS=Mus musculus GN=Cldn11 PE=1 SV=1                                     | 6.763285  | 1  | 3   | 1  | 22.099 | 7.91  | 7300000   | 2600000   | 4900000   | 9.08   |

|        |                                                                                       |           |    |     |    |        |       |          |          |          |        |
|--------|---------------------------------------------------------------------------------------|-----------|----|-----|----|--------|-------|----------|----------|----------|--------|
| P62746 | Rho-related GTP-binding protein RhoB OS=Mus musculus GN=RhoB PE=1 SV=1                | 38.265306 | 8  | 19  | 6  | 22.109 | 5.24  | 11000000 | 6600000  | 10000000 | 54.84  |
| P62082 | 40S ribosomal protein S7 OS=Mus musculus GN=Rps7 PE=2 SV=1                            | 4.6391753 | 1  | 3   | 1  | 22.113 | 10.1  |          |          |          | 6.15   |
| P43407 | Syndecan-2 OS=Mus musculus GN=Sdc2 PE=1 SV=1                                          | 4.950495  | 1  | 2   | 1  | 22.117 | 4.58  |          | 380000   | 450000   | 4.04   |
| P62761 | Visinin-like protein 1 OS=Mus musculus GN=Vsnl1 PE=1 SV=2                             | 67.015707 | 13 | 59  | 11 | 22.128 | 5.15  | 61000000 | 48000000 | 59000000 | 170.58 |
| Q9DBP5 | UMP-CMP kinase OS=Mus musculus GN=Cmpk1 PE=1 SV=1                                     | 5.6122449 | 1  | 1   | 1  | 22.151 | 5.83  |          |          | 1600000  | 2.62   |
| Q9CQJ6 | Density-regulated protein OS=Mus musculus GN=Denr PE=1 SV=1                           | 21.212121 | 3  | 4   | 3  | 22.152 | 5.3   |          | 3100000  | 3500000  | 14.43  |
| P35700 | Peroxiredoxin-1 OS=Mus musculus GN=Prdx1 PE=1 SV=1                                    | 48.241206 | 8  | 14  | 8  | 22.162 | 8.12  | 6400000  | 3300000  | 6800000  | 34.73  |
| Q99MS3 | Mpv17-like protein OS=Mus musculus GN=Mpv17i PE=1 SV=2                                | 4.1237113 | 1  | 1   | 1  | 22.166 | 10.05 | 580000   |          |          | 2.00   |
| Q61686 | Chromobox protein homolog 5 OS=Mus musculus GN=Cbx5 PE=1 SV=1                         | 29.319372 | 5  | 7   | 5  | 22.172 | 5.86  | 6600000  |          | 3800000  | 20.33  |
| Q9D1G1 | Ras-related protein Rab-1B OS=Mus musculus GN=Rab1b PE=1 SV=1                         | 50.248756 | 9  | 26  | 3  | 22.173 | 5.73  | 9700000  | 4300000  | 7500000  | 67.24  |
| Q8BGZ1 | Hippocalcin-like protein 4 OS=Mus musculus GN=Hpcal4 PE=1 SV=3                        | 48.691099 | 8  | 29  | 6  | 22.201 | 4.89  | 16000000 | 13000000 | 18000000 | 86.04  |
| Q91X97 | Neurocalcin-delta OS=Mus musculus GN=Ncald PE=1 SV=4                                  | 29.015544 | 5  | 20  | 3  | 22.231 | 5.35  | 6000000  | 4100000  | 4600000  | 56.17  |
| Q91Z61 | GTP-binding protein Di-Ras1 OS=Mus musculus GN=Diras1 PE=1 SV=1                       | 5.0505051 | 1  | 2   | 1  | 22.25  | 8.9   | 970000   |          | 860000   | 4.40   |
| Q9D6N5 | Dr1-associated corepressor OS=Mus musculus GN=Drap1 PE=1 SV=3                         | 10.731707 | 1  | 1   | 1  | 22.264 | 5.26  | 620000   |          |          | 2.14   |
| Q9CQW1 | Synaptobrevin homolog YKT6 OS=Mus musculus GN=Ykt6 PE=1 SV=1                          | 8.5858586 | 1  | 1   | 1  | 22.3   | 6.35  |          | 190000   |          | 1.96   |
| P11352 | Glutathione peroxidase 1 OS=Mus musculus GN=Gpx1 PE=1 SV=2                            | 13.432836 | 2  | 2   | 2  | 22.316 | 7.21  |          | 360000   |          | 4.60   |
| P62748 | Hippocalcin-like protein 1 OS=Mus musculus GN=Hpcal1 PE=1 SV=2                        | 22.797927 | 4  | 12  | 1  | 22.324 | 5.5   | 1000000  | 1200000  |          | 31.44  |
| P36536 | GTP-binding protein SAR1a OS=Mus musculus GN=Sar1a PE=1 SV=1                          | 9.5959596 | 2  | 3   | 2  | 22.357 | 6.93  | 1600000  | 1200000  | 3100000  | 5.97   |
| P61087 | Ubiquitin-conjugating enzyme E2 K OS=Mus musculus GN=Ube2k PE=1 SV=3                  | 6         | 1  | 2   | 1  | 22.393 | 5.44  |          | 500000   | 860000   | 5.07   |
| P84075 | Neuron-specific calcium-binding protein hippocalcin OS=Mus musculus GN=Hpca PE=1 SV=3 | 40.932642 | 7  | 20  | 3  | 22.413 | 4.97  | 6700000  | 4400000  | 6100000  | 52.49  |
| Q9JMG7 | Hepatoma-derived growth factor-related protein 3 OS=Mus musculus GN=Hdgfrp3 PE=1 SV=1 | 25.742574 | 3  | 8   | 3  | 22.417 | 8.4   | 14000000 |          | 5000000  | 24.53  |
| P61022 | Calcineurin B homologous protein 1 OS=Mus musculus GN=Chp1 PE=1 SV=2                  | 10.25641  | 2  | 4   | 2  | 22.418 | 5.1   | 1100000  | 1100000  | 1400000  | 8.03   |
| P61759 | Prefoldin subunit 3 OS=Mus musculus GN=Vbp1 PE=1 SV=2                                 | 10.204082 | 2  | 3   | 2  | 22.421 | 6.28  |          | 660000   | 690000   | 7.25   |
| Q8R0A5 | Transcription elongation factor A protein-like 3 OS=Mus musculus GN=Tceal3 PE=1 SV=2  | 23.5      | 4  | 10  | 2  | 22.455 | 5.44  | 2400000  | 900000   | 1700000  | 24.18  |
| Q9R1Q8 | Transgelin-3 OS=Mus musculus GN=Tagln3 PE=1 SV=1                                      | 13.065327 | 3  | 5   | 3  | 22.456 | 7.33  | 1500000  | 2000000  | 1700000  | 11.11  |
| Q5PR73 | GTP-binding protein Di-Ras2 OS=Mus musculus GN=Diras2 PE=1 SV=1                       | 17.58794  | 3  | 7   | 3  | 22.484 | 8.76  | 3800000  | 2000000  | 3400000  | 20.06  |
| P61027 | Ras-related protein Rab-10 OS=Mus musculus GN=Rab10 PE=1 SV=1                         | 39        | 7  | 25  | 5  | 22.527 | 8.38  | 17000000 | 5800000  | 4500000  | 70.38  |
| P43276 | Histone H1.5 OS=Mus musculus GN=Hist1h1b PE=1 SV=2                                    | 10.313901 | 2  | 2   | 2  | 22.562 | 10.92 | 7400000  | 2600000  |          | 4.87   |
| Q6ZWN5 | 40S ribosomal protein S9 OS=Mus musculus GN=Rps9 PE=1 SV=3                            | 28.350515 | 7  | 14  | 7  | 22.578 | 10.65 | 19000000 | 4500000  | 9400000  | 31.17  |
| Q9DCZ4 | MICOS complex subunit Mic26 OS=Mus musculus GN=Apoo PE=1 SV=2                         | 18.181818 | 3  | 7   | 3  | 22.59  | 9.25  | 9500000  | 6300000  | 14000000 | 21.09  |
| Q9JJR8 | Transmembrane protein 9B OS=Mus musculus GN=Tmem9b PE=1 SV=1                          | 10.552764 | 2  | 2   | 2  | 22.593 | 8.18  |          |          | 620000   | 1.81   |
| P62821 | Ras-related protein Rab-1A OS=Mus musculus GN=Rab1A PE=1 SV=3                         | 47.804878 | 9  | 37  | 3  | 22.663 | 6.21  | 8800000  | 5400000  | 8500000  | 97.59  |
| Q9R0Q3 | Transmembrane emp24 domain-containing protein 2 OS=Mus musculus GN=Tmed2 PE=1 SV=1    | 4.4776119 | 1  | 6   | 1  | 22.69  | 5.17  | 4400000  | 3100000  | 4400000  | 14.07  |
| Q9CXE2 | B-cell CLL/lymphoma 7 protein family member A OS=Mus musculus GN=Bcl7a PE=2 SV=2      | 12.857143 | 1  | 1   | 1  | 22.767 | 5.06  |          |          |          | 4.38   |
| P97461 | 40S ribosomal protein S5 OS=Mus musculus GN=Rps5 PE=1 SV=3                            | 3.9215686 | 1  | 3   | 1  | 22.875 | 9.72  | 6200000  | 4400000  | 5700000  | 6.40   |
| Q8BGR6 | ADP-ribosylation factor-like protein 15 OS=Mus musculus GN=Arl15 PE=1 SV=1            | 4.4117647 | 1  | 1   | 1  | 22.891 | 5.29  |          |          | 1000000  | 2.18   |
| Q9R1P3 | Proteasome subunit beta type-2 OS=Mus musculus GN=Psmb2 PE=1 SV=1                     | 9.9502488 | 2  | 4   | 2  | 22.892 | 7.02  | 1800000  | 1800000  | 530000   | 10.92  |
| Q9R1P1 | Proteasome subunit beta type-3 OS=Mus musculus GN=Psmb3 PE=1 SV=1                     | 7.804878  | 1  | 1   | 1  | 22.949 | 6.55  | 2700000  |          |          | 3.58   |
| Q9CQ37 | Ubiquitin-conjugating enzyme E2 T OS=Mus musculus GN=Ube2t PE=1 SV=1                  | 3.4313725 | 1  | 1   | 1  | 22.961 | 7.97  |          | 420000   |          | 1.85   |
| Q9CQU3 | Protein RER1 OS=Mus musculus GN=Rer1 PE=1 SV=1                                        | 9.1836735 | 1  | 1   | 1  | 22.973 | 9.51  | 1300000  |          |          | 3.12   |
| O54879 | High mobility group protein B3 OS=Mus musculus GN=Hmgb3 PE=1 SV=3                     | 6.5       | 1  | 1   | 1  | 22.995 | 8.37  | 1500000  |          |          | 2.46   |
| Q6PHN9 | Ras-related protein Rab-35 OS=Mus musculus GN=Rab35 PE=1 SV=1                         | 15.422886 | 3  | 13  | 1  | 23.011 | 8.29  | 18000000 |          | 21000000 | 32.73  |
| P35293 | Ras-related protein Rab-18 OS=Mus musculus GN=Rab18 PE=1 SV=2                         | 31.553398 | 5  | 11  | 5  | 23.021 | 5.36  | 7000000  | 3900000  | 6400000  | 34.46  |
| Q923S9 | Ras-related protein Rab-30 OS=Mus musculus GN=Rab30 PE=1 SV=1                         | 13.793103 | 2  | 12  | 1  | 23.044 | 4.97  |          | 360000   | 810000   | 31.72  |
| Q9DCL8 | Protein phosphatase inhibitor 2 OS=Mus musculus GN=Ppp1r2 PE=1 SV=3                   | 12.135922 | 1  | 1   | 1  | 23.105 | 4.83  |          |          | 1500000  | 2.73   |
| P35290 | Ras-related protein Rab-24 OS=Mus musculus GN=Rab24 PE=1 SV=2                         | 4.4334975 | 1  | 2   | 1  | 23.129 | 6.23  | 1400000  |          | 2000000  | 4.24   |
| Q8VBV7 | COP9 signalosome complex subunit 8 OS=Mus musculus GN=Cops8 PE=1 SV=1                 | 7.1770335 | 1  | 2   | 1  | 23.241 | 5.2   |          | 760000   | 770000   | 6.16   |
| P60879 | Synaptosomal-associated protein 25 OS=Mus musculus GN=Snap25 PE=1 SV=1                | 71.359223 | 17 | 105 | 17 | 23.3   | 4.77  | 73000000 | 59000000 | 84000000 | 355.79 |

|        |                                                                                      |           |    |    |    |        |       |           |          |           |        |
|--------|--------------------------------------------------------------------------------------|-----------|----|----|----|--------|-------|-----------|----------|-----------|--------|
| Q80U09 | Membrane-associated progesterone receptor component 2 OS=Mus musculus GN=Pgrm        | 34.562212 | 4  | 8  | 3  | 23.32  | 5.15  | 1400000   | 1300000  | 1400000   | 28.03  |
| Q9JIW9 | Ras-related protein Ral-B OS=Mus musculus GN=Ralb PE=1 SV=1                          | 4.368932  | 1  | 1  | 1  | 23.335 | 6.62  |           | 240000   |           | 2.33   |
| Q9DB20 | ATP synthase subunit O, mitochondrial OS=Mus musculus GN=Atp5o PE=1 SV=1             | 32.394366 | 5  | 14 | 5  | 23.349 | 9.99  | 5900000   | 6100000  | 5500000   | 41.81  |
| Q9DD18 | D-tyrosyl-tRNA(Tyr) deacylase 1 OS=Mus musculus GN=Dtd1 PE=1 SV=2                    | 6.6985646 | 1  | 2  | 1  | 23.37  | 7.87  | 1500000   | 1300000  |           | 5.58   |
| P62071 | Ras-related protein R-Ras2 OS=Mus musculus GN=Rras2 PE=1 SV=1                        | 13.72549  | 2  | 5  | 2  | 23.385 | 6.01  | 1800000   | 1200000  | 1900000   | 13.25  |
| Q99PT1 | Rho GDP-dissociation inhibitor 1 OS=Mus musculus GN=Arhgdia PE=1 SV=3                | 12.745098 | 2  | 2  | 2  | 23.393 | 5.2   |           | 2300000  | 520000    | 4.57   |
| P35278 | Ras-related protein Rab-5C OS=Mus musculus GN=Rab5c PE=1 SV=2                        | 27.777778 | 5  | 12 | 3  | 23.398 | 8.41  | 6600000   | 3400000  | 12000000  | 33.65  |
| P0C0A3 | Charged multivesicular body protein 6 OS=Mus musculus GN=Chmp6 PE=1 SV=2             | 13.5      | 2  | 6  | 2  | 23.401 | 5.44  | 3800000   | 2000000  | 2600000   | 21.95  |
| P61294 | Ras-related protein Rab-6B OS=Mus musculus GN=Rab6b PE=1 SV=1                        | 25.480769 | 5  | 18 | 2  | 23.447 | 5.53  | 2200000   | 1500000  | 1800000   | 45.15  |
| P19253 | 60S ribosomal protein L13a OS=Mus musculus GN=Rpl13a PE=1 SV=4                       | 15.270936 | 3  | 8  | 3  | 23.449 | 11.02 | 12000000  | 9000000  | 7000000   | 19.63  |
| P84099 | 60S ribosomal protein L19 OS=Mus musculus GN=Rpl19 PE=1 SV=1                         | 13.265306 | 2  | 7  | 2  | 23.451 | 11.47 | 28000000  | 9600000  | 14000000  | 22.97  |
| P51150 | Ras-related protein Rab-7a OS=Mus musculus GN=Rab7a PE=1 SV=2                        | 47.826087 | 8  | 27 | 8  | 23.475 | 6.7   | 20000000  | 9800000  | 18000000  | 90.51  |
| P53994 | Ras-related protein Rab-2A OS=Mus musculus GN=Rab2a PE=1 SV=1                        | 47.641509 | 8  | 25 | 8  | 23.533 | 6.54  | 20000000  | 24000000 | 37000000  | 79.54  |
| P63321 | Ras-related protein Ral-A OS=Mus musculus GN=Rala PE=1 SV=1                          | 14.07767  | 3  | 10 | 3  | 23.538 | 7.11  | 15000000  | 7900000  | 11000000  | 34.93  |
| Q9CR57 | 60S ribosomal protein L14 OS=Mus musculus GN=Rpl14 PE=1 SV=3                         | 10.138249 | 2  | 9  | 2  | 23.549 | 11.02 | 14000000  | 4000000  | 6600000   | 26.42  |
| Q7TQD2 | Tubulin polymerization-promoting protein OS=Mus musculus GN=Tppp PE=1 SV=1           | 20.642202 | 4  | 11 | 4  | 23.56  | 9.42  | 12000000  | 7600000  | 12000000  | 30.20  |
| P35279 | Ras-related protein Rab-6A OS=Mus musculus GN=Rab6a PE=1 SV=4                        | 23.076923 | 4  | 17 | 1  | 23.575 | 5.54  | 2700000   | 2400000  | 3200000   | 43.11  |
| P34022 | Ran-specific GTPase-activating protein OS=Mus musculus GN=Ranbp1 PE=1 SV=2           | 16.748768 | 1  | 3  | 1  | 23.582 | 5.22  | 3500000   |          | 7300000   | 7.46   |
| Q8VDP6 | CDP-diacylglycerol--inositol 3-phosphatidyltransferase OS=Mus musculus GN=Cdipt PE=  | 4.6948357 | 1  | 1  | 1  | 23.583 | 8.27  | 4200000   |          |           | 2.61   |
| Q9CQD1 | Ras-related protein Rab-5A OS=Mus musculus GN=Rab5a PE=1 SV=1                        | 27.906977 | 5  | 12 | 3  | 23.584 | 8.15  | 130000    | 4700000  |           | 30.60  |
| P61028 | Ras-related protein Rab-8B OS=Mus musculus GN=Rab8b PE=1 SV=1                        | 30.434783 | 6  | 20 | 2  | 23.588 | 9.07  | 600000    | 2700000  | 250000    | 50.05  |
| P19157 | Glutathione S-transferase P 1 OS=Mus musculus GN=Gstp1 PE=1 SV=2                     | 7.6190476 | 1  | 4  | 1  | 23.594 | 7.87  | 720000    | 670000   | 1100000   | 8.47   |
| Q91ZR1 | Ras-related protein Rab-4B OS=Mus musculus GN=Rab4b PE=1 SV=2                        | 9.8591549 | 2  | 12 | 1  | 23.614 | 6.06  |           | 1600000  | 2400000   | 30.40  |
| P06837 | Neuromodulin OS=Mus musculus GN=Gap43 PE=1 SV=1                                      | 50.220264 | 10 | 68 | 10 | 23.618 | 4.73  | 79000000  | 57000000 | 84000000  | 227.04 |
| P0C7M9 | C-type lectin domain family 2 member L OS=Mus musculus GN=Clec2l PE=1 SV=1           | 9.9526066 | 2  | 3  | 2  | 23.638 | 7.2   | 800000    |          | 630000    | 6.54   |
| Q9D7V2 | LysM and putative peptidoglycan-binding domain-containing protein 2 OS=Mus musculus  | 5.1162791 | 1  | 2  | 1  | 23.679 | 5.71  | 1000000   | 420000   |           | 4.17   |
| P61021 | Ras-related protein Rab-5B OS=Mus musculus GN=Rab5b PE=1 SV=1                        | 22.325581 | 5  | 11 | 3  | 23.692 | 8.13  | 2700000   | 160000   | 400000    | 29.61  |
| P24369 | Peptidyl-prolyl cis-trans isomerase B OS=Mus musculus GN=Ppib PE=1 SV=2              | 25.462963 | 5  | 12 | 5  | 23.699 | 9.55  | 4200000   | 2700000  | 2800000   | 29.97  |
| Q3UJP5 | Protein C8orf37 homolog OS=Mus musculus PE=1 SV=1                                    | 5.7416268 | 1  | 1  | 1  | 23.833 | 6.86  |           |          | 530000    | 2.00   |
| P12961 | Neuroendocrine protein 7B2 OS=Mus musculus GN=Scg5 PE=1 SV=1                         | 8.490566  | 1  | 1  | 1  | 23.851 | 5.81  |           | 420000   |           | 4.20   |
| Q91V41 | Ras-related protein Rab-14 OS=Mus musculus GN=Rab14 PE=1 SV=3                        | 33.488372 | 5  | 20 | 4  | 23.882 | 6.21  | 10000000  | 6600000  | 11000000  | 54.03  |
| O08989 | Ras-related protein M-Ras OS=Mus musculus GN=Mras PE=1 SV=1                          | 7.6923077 | 1  | 2  | 1  | 23.886 | 8.78  | 4900000   | 1300000  |           | 5.28   |
| Q8BJF9 | Charged multivesicular body protein 2b OS=Mus musculus GN=Chmp2b PE=1 SV=1           | 7.9812207 | 2  | 5  | 1  | 23.919 | 8.78  | 2000000   | 840000   | 1900000   | 13.27  |
| Q8K3J1 | NADH dehydrogenase [ubiquinone] iron-sulfur protein 8, mitochondrial OS=Mus musculus | 17.924528 | 3  | 14 | 3  | 24.023 | 6.21  | 9800000   | 6300000  | 11000000  | 40.29  |
| P97478 | 5-demethoxyubiquinone hydroxylase, mitochondrial OS=Mus musculus GN=Coq7 PE=1 SV=1   | 4.1474654 | 1  | 1  | 1  | 24.026 | 7.17  | 750000    |          |           | 2.36   |
| P35282 | Ras-related protein Rab-21 OS=Mus musculus GN=Rab21 PE=1 SV=4                        | 22.972973 | 4  | 7  | 4  | 24.091 | 7.94  | 2900000   | 860000   | 1800000   | 17.66  |
| Q9CZM2 | 60S ribosomal protein L15 OS=Mus musculus GN=Rpl15 PE=2 SV=4                         | 11.27451  | 3  | 8  | 3  | 24.131 | 11.62 | 11000000  | 8300000  | 7400000   | 16.88  |
| Q922J6 | Tetraspanin-2 OS=Mus musculus GN=Tspan2 PE=1 SV=1                                    | 5.4298643 | 1  | 4  | 1  | 24.165 | 7.96  | 17000000  | 5400000  | 11000000  | 14.28  |
| Q8BWR2 | PITH domain-containing protein 1 OS=Mus musculus GN=Pithd1 PE=1 SV=1                 | 5.2132701 | 1  | 2  | 1  | 24.177 | 5.74  | 770000    | 360000   |           | 4.28   |
| P62242 | 40S ribosomal protein S8 OS=Mus musculus GN=Rps8 PE=1 SV=2                           | 39.903846 | 7  | 21 | 7  | 24.19  | 10.32 | 31000000  | 14000000 | 18000000  | 59.67  |
| Q56A07 | Sodium channel subunit beta-2 OS=Mus musculus GN=Sctn2b PE=1 SV=1                    | 18.604651 | 4  | 11 | 4  | 24.212 | 6.54  | 10000000  | 6400000  | 13000000  | 29.44  |
| P47963 | 60S ribosomal protein L13 OS=Mus musculus GN=Rpl13 PE=1 SV=3                         | 24.170616 | 5  | 11 | 5  | 24.291 | 11.55 | 21000000  | 11000000 | 13000000  | 27.94  |
| Q99LP6 | GrpE protein homolog 1, mitochondrial OS=Mus musculus GN=Grpel1 PE=1 SV=1            | 5.0691244 | 1  | 2  | 1  | 24.292 | 8.38  | 1200000   |          | 1300000   | 6.39   |
| Q8K386 | Ras-related protein Rab-15 OS=Mus musculus GN=Rab15 PE=1 SV=1                        | 29.245283 | 4  | 17 | 2  | 24.303 | 5.71  | 140000000 | 9600000  | 160000000 | 51.32  |
| Q9CYH2 | Redox-regulatory protein FAM213A OS=Mus musculus GN=Fam213a PE=1 SV=2                | 19.724771 | 4  | 12 | 4  | 24.379 | 9.17  | 7400000   | 4100000  | 5300000   | 33.94  |
| P00761 | Trypsin - Sus scrofa (Pig).                                                          | 25.108225 | 4  | 81 | 4  | 24.394 | 7.18  | 2.4E+09   | 2.3E+09  | 3.5E+09   | 280.25 |
| P62827 | GTP-binding nuclear protein Ran OS=Mus musculus GN=Ran PE=1 SV=3                     | 19.444444 | 4  | 9  | 4  | 24.408 | 7.49  | 9300000   | 4100000  | 8500000   | 22.76  |
| P46638 | Ras-related protein Rab-11B OS=Mus musculus GN=Rab11b PE=1 SV=3                      | 40.825688 | 9  | 23 | 9  | 24.474 | 5.94  | 18000000  | 13000000 | 20000000  | 57.54  |



|         |                                                                                                        |           |    |    |   |        |       |          |          |          |        |
|---------|--------------------------------------------------------------------------------------------------------|-----------|----|----|---|--------|-------|----------|----------|----------|--------|
| Q8R191  | Synaptogyrin-3 OS=Mus musculus GN=Syngr3 PE=1 SV=1                                                     | 19.650655 | 4  | 11 | 4 | 24.545 | 8.18  | 25000000 | 20000000 | 22000000 | 34.04  |
| Q9D1X0  | Nucleolar protein 3 OS=Mus musculus GN=Nol3 PE=1 SV=1                                                  | 17.272727 | 2  | 4  | 2 | 24.552 | 4.07  | 4000000  | 3100000  | 3000000  | 16.83  |
| P00493  | Hypoxanthine-guanine phosphoribosyltransferase OS=Mus musculus GN=Hprt1 PE=1 SV=1                      | 17.431193 | 3  | 9  | 3 | 24.555 | 6.68  | 2700000  | 1500000  | 2500000  | 20.71  |
| Q6Z WV3 | 60S ribosomal protein L10 OS=Mus musculus GN=Rpl10 PE=1 SV=3                                           | 11.682243 | 2  | 8  | 2 | 24.588 | 10.08 | 14000000 | 3700000  | 14000000 | 25.19  |
| P09671  | Superoxide dismutase [Mn], mitochondrial OS=Mus musculus GN=Sod2 PE=1 SV=3                             | 19.81982  | 4  | 9  | 4 | 24.588 | 8.62  | 16000000 | 5200000  | 15000000 | 28.81  |
| P23506  | Protein-L-isoaspartate(D-aspartate) O-methyltransferase OS=Mus musculus GN=Pcmt1 PE=1 SV=1             | 13.215859 | 2  | 4  | 2 | 24.619 | 7.65  | 4500000  | 4300000  | 8900000  | 10.85  |
| P97952  | Sodium channel subunit beta-1 OS=Mus musculus GN=Scn1b PE=1 SV=1                                       | 11.46789  | 2  | 6  | 2 | 24.634 | 4.83  | 3500000  | 2500000  | 8000000  | 13.33  |
| Q9DC70  | NADH dehydrogenase [ubiquinone] iron-sulfur protein 7, mitochondrial OS=Mus musculus GN=Nd1b PE=1 SV=1 | 17.410714 | 4  | 19 | 4 | 24.667 | 9.92  | 9200000  | 5200000  | 7500000  | 53.52  |
| O70251  | Elongation factor 1-beta OS=Mus musculus GN=Eef1b PE=1 SV=5                                            | 33.333333 | 5  | 18 | 4 | 24.678 | 4.69  | 9500000  | 5300000  | 7300000  | 63.77  |
| O08547  | Vesicle-trafficking protein SEC22b OS=Mus musculus GN=Sec22b PE=1 SV=3                                 | 24.186047 | 4  | 13 | 4 | 24.725 | 8.51  | 7100000  | 1500000  | 3800000  | 37.67  |
| Q9CZT8  | Ras-related protein Rab-3B OS=Mus musculus GN=Rab3b PE=1 SV=1                                          | 34.246575 | 7  | 46 | 2 | 24.741 | 5.11  | 21000000 | 16000000 | 26000000 | 140.01 |
| Q8BHK2  | Sodium channel subunit beta-3 OS=Mus musculus GN=Scn3b PE=1 SV=1                                       | 9.3023256 | 1  | 3  | 1 | 24.773 | 4.74  | 1500000  | 1500000  | 1700000  | 11.16  |
| Q9R0P9  | Ubiquitin carboxyl-terminal hydrolase isozyme L1 OS=Mus musculus GN=Uchl1 PE=1 SV=1                    | 35.426009 | 5  | 14 | 5 | 24.822 | 5.24  | 10000000 | 6400000  | 11000000 | 48.93  |
| O08709  | Peroxiredoxin-6 OS=Mus musculus GN=Prdx6 PE=1 SV=3                                                     | 22.321429 | 4  | 13 | 4 | 24.855 | 6.01  | 2600000  | 1900000  | 3300000  | 36.30  |
| P63158  | High mobility group protein B1 OS=Mus musculus GN=Hmgb1 PE=1 SV=2                                      | 26.976744 | 3  | 11 | 3 | 24.878 | 5.74  | 17000000 | 3100000  | 22000000 | 36.66  |
| Q9D1D4  | Transmembrane emp24 domain-containing protein 10 OS=Mus musculus GN=Tmed10 PE=1 SV=1                   | 21.004566 | 4  | 8  | 4 | 24.895 | 6.7   | 4000000  | 2600000  | 3500000  | 23.37  |
| P53026  | 60S ribosomal protein L10a OS=Mus musculus GN=Rpl10a PE=1 SV=3                                         | 19.354839 | 4  | 8  | 4 | 24.901 | 9.98  | 8400000  | 4400000  | 4500000  | 17.72  |
| Q4VAE3  | Transmembrane protein 65 OS=Mus musculus GN=Tmem65 PE=1 SV=1                                           | 23.076923 | 5  | 13 | 5 | 24.902 | 7.78  | 5900000  | 5100000  | 5200000  | 35.74  |
| Q9D8B3  | Charged multivesicular body protein 4b OS=Mus musculus GN=Chmp4b PE=1 SV=2                             | 15.625    | 3  | 5  | 3 | 24.921 | 4.82  | 5200000  | 2900000  | 3700000  | 17.09  |
| P67871  | Casein kinase II subunit beta OS=Mus musculus GN=Csnk2b PE=1 SV=1                                      | 22.790698 | 4  | 10 | 4 | 24.926 | 5.55  | 6300000  | 1500000  | 7300000  | 28.61  |
| Q9CQ06  | 39S ribosomal protein L24, mitochondrial OS=Mus musculus GN=Mrpl24 PE=1 SV=1                           | 3.2407407 | 1  | 1  | 1 | 24.929 | 9.5   |          | 300000   |          | 1.90   |
| P70280  | Vesicle-associated membrane protein 7 OS=Mus musculus GN=Vamp7 PE=1 SV=1                               | 8.6363636 | 2  | 3  | 2 | 24.951 | 8.6   | 860000   |          | 580000   | 6.56   |
| P63011  | Ras-related protein Rab-3A OS=Mus musculus GN=Rab3a PE=1 SV=1                                          | 61.818182 | 13 | 70 | 7 | 24.954 | 5.03  | 15000000 | 12000000 | 20000000 | 205.00 |
| O89116  | Vesicle transport through interaction with t-SNAREs homolog 1A OS=Mus musculus GN=Vtga1 PE=1 SV=1      | 6.9124424 | 1  | 1  | 1 | 24.971 | 6.4   |          | 160000   |          | 2.87   |
| Q9DBZ5  | Eukaryotic translation initiation factor 3 subunit K OS=Mus musculus GN=EIF3k PE=1 SV=1                | 5.0458716 | 1  | 1  | 1 | 25.07  | 4.93  |          | 890000   |          | 2.21   |
| Q9DB34  | Charged multivesicular body protein 2a OS=Mus musculus GN=Chmp2a PE=1 SV=1                             | 3.6036036 | 1  | 1  | 1 | 25.118 | 5.97  | 850000   |          |          | 2.03   |
| Q62446  | Peptidyl-prolyl cis-trans isomerase FKBP3 OS=Mus musculus GN=Fkbp3 PE=1 SV=2                           | 4.9107143 | 1  | 3  | 1 | 25.132 | 9.28  | 5300000  | 3300000  | 4400000  | 7.91   |
| Q61RU5  | Clathrin light chain B OS=Mus musculus GN=Cltb PE=1 SV=1                                               | 16.157205 | 4  | 13 | 4 | 25.156 | 4.63  | 12000000 | 9100000  | 14000000 | 33.53  |
| Q60631  | Growth factor receptor-bound protein 2 OS=Mus musculus GN=Grb2 PE=1 SV=1                               | 23.963134 | 4  | 8  | 4 | 25.222 | 6.32  | 5800000  | 4900000  | 5400000  | 25.20  |
| P40240  | CD9 antigen OS=Mus musculus GN=Cd9 PE=1 SV=2                                                           | 3.0973451 | 1  | 3  | 1 | 25.241 | 7.23  | 16000000 | 4600000  | 9100000  | 6.80   |
| Q9JKV5  | Secretory carrier-associated membrane protein 4 OS=Mus musculus GN=Scamp4 PE=1 SV=1                    | 4.7826087 | 1  | 3  | 1 | 25.326 | 8.66  | 4600000  | 1200000  | 2100000  | 8.21   |
| Q60692  | Proteasome subunit beta type-6 OS=Mus musculus GN=Psm6 PE=1 SV=3                                       | 13.02521  | 3  | 8  | 3 | 25.362 | 5.11  | 9800000  | 5700000  | 11000000 | 21.03  |
| Q9D1C8  | Vacuolar protein sorting-associated protein 28 homolog OS=Mus musculus GN=Vps28 PE=1 SV=1              | 6.7873303 | 1  | 1  | 1 | 25.436 | 5.54  |          |          | 620000   | 3.72   |
| Q8BIF0  | CD99 antigen-like protein 2 OS=Mus musculus GN=Cd99l2 PE=1 SV=1                                        | 26.160338 | 4  | 10 | 4 | 25.447 | 4.86  | 2800000  | 3100000  | 3000000  | 33.96  |
| Q62093  | Serine/arginine-rich splicing factor 2 OS=Mus musculus GN=Srsf2 PE=1 SV=4                              | 14.932127 | 4  | 20 | 4 | 25.461 | 11.85 | 17000000 | 960000   | 13000000 | 64.53  |
| Q9JM93  | ADP-ribosylation factor-like protein 6-interacting protein 4 OS=Mus musculus GN=Arl6ip4 PE=1 SV=1      | 12.227074 | 2  | 2  | 2 | 25.51  | 11.19 | 1100000  |          |          | 6.28   |
| Q99MB7  | RING finger protein 141 OS=Mus musculus GN=Rnf141 PE=1 SV=2                                            | 4.3478261 | 1  | 1  | 1 | 25.512 | 5.2   |          |          | 1500000  | 2.77   |
| P24472  | Glutathione S-transferase A4 OS=Mus musculus GN=Gsta4 PE=1 SV=3                                        | 4.5045045 | 1  | 2  | 1 | 25.547 | 7.39  | 2300000  | 960000   |          | 4.39   |
| Q8BV14  | Dihydropteridine reductase OS=Mus musculus GN=Qdpr PE=1 SV=2                                           | 7.4688797 | 1  | 5  | 1 | 25.554 | 7.81  | 750000   | 1000000  | 540000   | 15.63  |
| O08585  | Clathrin light chain A OS=Mus musculus GN=Cita PE=1 SV=2                                               | 17.87234  | 5  | 13 | 5 | 25.588 | 4.58  | 2000000  | 1500000  | 2200000  | 30.20  |
| O55100  | Synaptogyrin-1 OS=Mus musculus GN=Syngr1 PE=1 SV=2                                                     | 10.25641  | 2  | 8  | 2 | 25.636 | 4.65  | 6100000  | 4500000  | 6100000  | 26.40  |
| P35762  | CD81 antigen OS=Mus musculus GN=Cd81 PE=1 SV=2                                                         | 21.186441 | 3  | 22 | 3 | 25.797 | 5.83  | 18000000 | 5600000  | 12000000 | 86.45  |
| Q9JIK9  | 28S ribosomal protein S34, mitochondrial OS=Mus musculus GN=Mrps34 PE=1 SV=1                           | 6.8807339 | 1  | 1  | 1 | 25.811 | 10.43 | 1000000  |          |          | 2.47   |
| P62823  | Ras-related protein Rab-3C OS=Mus musculus GN=Rab3c PE=1 SV=1                                          | 45.374449 | 10 | 40 | 5 | 25.856 | 5.24  | 18000000 | 13000000 | 19000000 | 110.89 |
| P49722  | Proteasome subunit alpha type-2 OS=Mus musculus GN=Psm2 PE=1 SV=3                                      | 15.811966 | 3  | 4  | 3 | 25.91  | 7.43  |          | 880000   | 6900000  | 9.58   |
| P10649  | Glutathione S-transferase Mu 1 OS=Mus musculus GN=Gstm1 PE=1 SV=2                                      | 28.440367 | 6  | 14 | 5 | 25.953 | 7.94  | 11000000 | 4200000  | 12000000 | 40.02  |
| P00405  | Cytochrome c oxidase subunit 2 OS=Mus musculus GN=Mtco2 PE=1 SV=1                                      | 20.264317 | 3  | 14 | 3 | 25.959 | 4.73  | 5500000  | 2400000  | 9500000  | 35.30  |
| Q02105  | Complement C1q subcomponent subunit C OS=Mus musculus GN=C1qc PE=1 SV=2                                | 5.2845528 | 1  | 1  | 1 | 25.975 | 8.54  |          | 1700000  |          | 2.91   |

|        |                                                                                       |           |    |    |    |        |       |           |           |           |        |
|--------|---------------------------------------------------------------------------------------|-----------|----|----|----|--------|-------|-----------|-----------|-----------|--------|
| Q8JZS0 | Protein lin-7 homolog A OS=Mus musculus GN=Lin7a PE=1 SV=2                            | 45.064378 | 9  | 25 | 5  | 25.977 | 8.72  | 7700000   | 5500000   | 8800000   | 66.66  |
| Q61189 | Methylosome subunit pCln OS=Mus musculus GN=Clns1a PE=1 SV=1                          | 5.5084746 | 1  | 1  | 1  | 26.005 | 4.12  | 1400000   |           |           | 2.46   |
| Q8R1V4 | Transmembrane emp24 domain-containing protein 4 OS=Mus musculus GN=Tmed4 PE=          | 12.334802 | 2  | 3  | 1  | 26.005 | 8.18  |           | 2600000   | 3900000   | 10.16  |
| Q6PEB6 | MOB-like protein phocein OS=Mus musculus GN=Mob4 PE=1 SV=1                            | 10.222222 | 2  | 4  | 2  | 26.016 | 5.78  | 2500000   | 2700000   |           | 8.45   |
| Q9JKD3 | Secretory carrier-associated membrane protein 5 OS=Mus musculus GN=Scamp5 PE=1        | 8.5106383 | 2  | 10 | 2  | 26.051 | 8.54  | 36000000  | 26000000  | 41000000  | 26.13  |
| Q6PGH0 | Ubiquitin domain-containing protein 2 OS=Mus musculus GN=Ubd2 PE=2 SV=1               | 2.991453  | 1  | 1  | 1  | 26.128 | 5.83  | 380000    |           |           | 1.81   |
| P50518 | V-type proton ATPase subunit E 1 OS=Mus musculus GN=Atp6v1e1 PE=1 SV=2                | 38.495575 | 10 | 36 | 10 | 26.141 | 8.43  | 41000000  | 29000000  | 30000000  | 106.01 |
| Q62348 | Translin OS=Mus musculus GN=Tsn PE=1 SV=1                                             | 6.5789474 | 1  | 2  | 1  | 26.185 | 6.44  | 7200000   | 1500000   |           | 6.68   |
| Q9CQ79 | Thioredoxin domain-containing protein 9 OS=Mus musculus GN=Txndc9 PE=1 SV=1           | 5.7522124 | 1  | 1  | 1  | 26.243 | 5.95  |           |           | 2400000   | 2.53   |
| P51859 | Hepatoma-derived growth factor OS=Mus musculus GN=Hdgf PE=1 SV=2                      | 22.362869 | 4  | 7  | 4  | 26.253 | 4.83  | 3200000   | 1100000   | 1600000   | 18.72  |
| Q3UBX0 | Transmembrane protein 109 OS=Mus musculus GN=Tmem109 PE=1 SV=2                        | 4.9382716 | 1  | 2  | 1  | 26.289 | 9.89  | 4300000   |           | 3300000   | 6.14   |
| Q9EP72 | ER membrane protein complex subunit 7 OS=Mus musculus GN=Emc7 PE=1 SV=1               | 9.5435685 | 2  | 2  | 2  | 26.293 | 9.23  | 1500000   | 970000    |           | 4.51   |
| Q80XU3 | Nuclear ubiquitous casein and cyclin-dependent kinase substrate 1 OS=Mus musculus GN= | 11.965812 | 2  | 4  | 2  | 26.298 | 5.14  | 4500000   |           | 2700000   | 12.61  |
| Q9JMG3 | Transmembrane and ubiquitin-like domain-containing protein 1 OS=Mus musculus GN=Tr    | 4.0816327 | 1  | 1  | 1  | 26.3   | 5.03  |           |           | 930000    | 2.08   |
| Q9CRB9 | MICOS complex subunit Mic19 OS=Mus musculus GN=Chchd3 PE=1 SV=1                       | 31.277533 | 6  | 12 | 6  | 26.318 | 8.37  | 9900000   | 9100000   | 22000000  | 40.31  |
| O09061 | Proteasome subunit beta type-1 OS=Mus musculus GN=Psm1 PE=1 SV=1                      | 5.8333333 | 1  | 1  | 1  | 26.355 | 7.81  |           |           | 1300000   | 2.39   |
| Q9Z2U1 | Proteasome subunit alpha type-5 OS=Mus musculus GN=Psm5 PE=1 SV=1                     | 7.8838174 | 1  | 4  | 1  | 26.394 | 4.79  | 2800000   | 3300000   | 4300000   | 15.40  |
| Q8BH50 | Uncharacterized protein C18orf25 homolog OS=Mus musculus PE=1 SV=1                    | 5.7142857 | 1  | 2  | 1  | 26.43  | 5.19  | 1900000   |           | 1300000   | 6.94   |
| Q9CXW3 | Calcyclin-binding protein OS=Mus musculus GN=Cacybp PE=1 SV=1                         | 4.8034934 | 1  | 2  | 1  | 26.494 | 7.87  | 2700000   | 1500000   |           | 4.30   |
| Q9QY36 | N-alpha-acetyltransferase 10 OS=Mus musculus GN=Naa10 PE=1 SV=1                       | 6.3829787 | 1  | 2  | 1  | 26.503 | 5.64  |           | 670000    | 1300000   | 5.75   |
| P97950 | Ras-related protein Rab-33A OS=Mus musculus GN=Rab33a PE=2 SV=1                       | 8.8607595 | 2  | 2  | 2  | 26.523 | 7.88  | 3300000   | 560000    |           | 5.44   |
| P50171 | Estradiol 17-beta-dehydrogenase 8 OS=Mus musculus GN=Hsd17b8 PE=1 SV=2                | 5.019305  | 1  | 2  | 1  | 26.572 | 6.54  | 1500000   |           | 1400000   | 5.27   |
| P48774 | Glutathione S-transferase Mu 5 OS=Mus musculus GN=Gstm5 PE=1 SV=1                     | 22.767857 | 5  | 11 | 4  | 26.617 | 7.21  | 3300000   | 1200000   | 3100000   | 28.22  |
| P62908 | 40S ribosomal protein S3 OS=Mus musculus GN=Rps3 PE=1 SV=1                            | 36.213992 | 8  | 19 | 8  | 26.657 | 9.66  | 22000000  | 7800000   | 13000000  | 51.62  |
| P35288 | Ras-related protein Rab-23 OS=Mus musculus GN=Rab23 PE=1 SV=2                         | 21.940928 | 4  | 7  | 4  | 26.662 | 6.79  | 1900000   | 610000    | 1700000   | 19.79  |
| O88384 | Vesicle transport through interaction with t-SNAREs homolog 1B OS=Mus musculus GN=    | 9.4827586 | 2  | 2  | 2  | 26.697 | 8.79  | 1300000   |           | 2300000   | 4.74   |
| P14106 | Complement C1q subcomponent subunit B OS=Mus musculus GN=C1qb PE=1 SV=2               | 4.743083  | 1  | 3  | 1  | 26.701 | 8.15  | 4400000   | 2500000   | 4000000   | 9.22   |
| Q8BJU2 | Tetraspanin-9 OS=Mus musculus GN=Tspan9 PE=1 SV=1                                     | 2.9288703 | 1  | 1  | 1  | 26.719 | 7.42  | 1100000   |           |           | 2.21   |
| Q9D8Y0 | EF-hand domain-containing protein D2 OS=Mus musculus GN=Efh2 PE=1 SV=1                | 20.833333 | 4  | 18 | 4  | 26.775 | 5.06  | 4500000   | 4500000   | 11000000  | 57.14  |
| O08583 | THO complex subunit 4 OS=Mus musculus GN=Alyref PE=1 SV=3                             | 7.0588235 | 1  | 1  | 1  | 26.924 | 11.15 | 1100000   |           |           | 2.62   |
| Q9QY76 | Vesicle-associated membrane protein-associated protein B OS=Mus musculus GN=Vapb      | 15.63786  | 3  | 10 | 2  | 26.929 | 7.78  | 19000000  | 9900000   | 17000000  | 31.10  |
| Q9QZB1 | Regulator of G-protein signaling 20 OS=Mus musculus GN=Rgs20 PE=1 SV=1                | 6.6945607 | 2  | 3  | 2  | 26.969 | 5.16  | 1500000   |           | 1200000   | 5.97   |
| Q99KF1 | Transmembrane emp24 domain-containing protein 9 OS=Mus musculus GN=Tmed9 PE=          | 11.914894 | 2  | 3  | 1  | 27.11  | 8.41  | 3800000   |           | 9800000   | 10.35  |
| P04370 | Myelin basic protein OS=Mus musculus GN=Mbp PE=1 SV=2                                 | 30.4      | 6  | 45 | 6  | 27.151 | 9.58  | 190000000 | 51000000  | 120000000 | 121.44 |
| Q9QXV0 | ProSAAS OS=Mus musculus GN=Pcsk1n PE=1 SV=2                                           | 18.604651 | 3  | 9  | 3  | 27.254 | 5.85  | 1400000   | 1700000   | 1800000   | 29.88  |
| Q9D6J6 | NADH dehydrogenase [ubiquinone] flavoprotein 2, mitochondrial OS=Mus musculus GN=     | 16.129032 | 3  | 10 | 3  | 27.268 | 7.4   | 6600000   | 5000000   | 5900000   | 31.72  |
| P35283 | Ras-related protein Rab-12 OS=Mus musculus GN=Rab12 PE=1 SV=3                         | 17.695473 | 4  | 14 | 3  | 27.311 | 8.41  | 2600000   |           | 2300000   | 36.54  |
| Q9WUK2 | Eukaryotic translation initiation factor 4H OS=Mus musculus GN=Eif4h PE=1 SV=3        | 13.709677 | 3  | 4  | 3  | 27.324 | 7.23  | 23000000  |           | 7800000   | 10.67  |
| Q9QUM9 | Proteasome subunit alpha type-6 OS=Mus musculus GN=Psm6 PE=1 SV=1                     | 14.227642 | 3  | 7  | 3  | 27.355 | 6.76  | 7100000   | 2900000   | 4000000   | 18.90  |
| O08756 | 3-hydroxyacyl-CoA dehydrogenase type-2 OS=Mus musculus GN=Hsd17b10 PE=1 SV=4          | 12.643678 | 2  | 5  | 2  | 27.402 | 8.41  | 1000000   | 480000    |           | 16.65  |
| Q9D1F4 | Proline-rich AKT1 substrate 1 OS=Mus musculus GN=Akt1s1 PE=1 SV=1                     | 7.3929961 | 1  | 2  | 1  | 27.466 | 4.72  | 510000    |           | 670000    | 8.75   |
| Q9CXS4 | Centromere protein V OS=Mus musculus GN=Cenpv PE=1 SV=2                               | 38.492063 | 6  | 10 | 6  | 27.524 | 9.79  | 11000000  |           | 7400000   | 29.59  |
| Q62283 | Tetraspanin-7 OS=Mus musculus GN=Tspan7 PE=1 SV=2                                     | 6.0240964 | 1  | 11 | 1  | 27.526 | 7.2   | 39000000  | 20000000  | 31000000  | 40.59  |
| Q9CRD0 | OCL1 domain-containing protein 1 OS=Mus musculus GN=Ociad1 PE=1 SV=1                  | 8.9068826 | 1  | 4  | 1  | 27.593 | 7.81  | 2600000   | 2000000   | 3200000   | 17.35  |
| Q9DCW4 | Electron transfer flavoprotein subunit beta OS=Mus musculus GN=Etfb PE=1 SV=3         | 8.627451  | 2  | 4  | 2  | 27.606 | 8.1   | 2200000   | 1200000   | 2200000   | 8.95   |
| Q3UY34 | Uncharacterized protein C12orf43 homolog OS=Mus musculus PE=2 SV=1                    | 11.71875  | 2  | 4  | 2  | 27.614 | 8.7   | 930000    |           | 600000    | 11.53  |
| Q6PDM2 | Serine/arginine-rich splicing factor 1 OS=Mus musculus GN=Srsf1 PE=1 SV=3             | 33.064516 | 9  | 18 | 9  | 27.728 | 10.36 | 34000000  |           | 18000000  | 45.69  |
| P63101 | 14-3-3 protein zeta/delta OS=Mus musculus GN=Ywhaz PE=1 SV=1                          | 64.897959 | 18 | 88 | 15 | 27.754 | 4.79  | 280000000 | 240000000 | 360000000 | 299.89 |

|        |                                                                                       |           |    |     |    |        |       |           |          |           |        |
|--------|---------------------------------------------------------------------------------------|-----------|----|-----|----|--------|-------|-----------|----------|-----------|--------|
| P68254 | 14-3-3 protein theta OS=Mus musculus GN=Ywhaq PE=1 SV=1                               | 56.734694 | 15 | 54  | 11 | 27.761 | 4.78  | 46000000  | 31000000 | 54000000  | 169.85 |
| Q9D883 | Splicing factor U2AF 35 kDa subunit OS=Mus musculus GN=U2af1 PE=1 SV=4                | 12.552301 | 3  | 6   | 3  | 27.797 | 8.81  | 3200000   |          | 1300000   | 15.12  |
| Q9WV55 | Vesicle-associated membrane protein-associated protein A OS=Mus musculus GN=Vapa      | 28.11245  | 6  | 18  | 5  | 27.837 | 8.4   | 14000000  | 4600000  | 14000000  | 44.79  |
| Q9Z2U0 | Proteasome subunit alpha type-7 OS=Mus musculus GN=Psm7 PE=1 SV=1                     | 22.580645 | 5  | 8   | 5  | 27.838 | 8.46  | 5800000   | 2400000  | 4300000   | 21.87  |
| Q9EQQ2 | Protein YIPF5 OS=Mus musculus GN=Yipf5 PE=1 SV=1                                      | 4.6692607 | 1  | 3   | 1  | 27.855 | 4.36  | 1200000   | 390000   | 570000    | 8.22   |
| Q61335 | B-cell receptor-associated protein 31 OS=Mus musculus GN=Bcap31 PE=1 SV=4             | 7.755102  | 2  | 6   | 2  | 27.939 | 8.7   | 1600000   | 1600000  | 3400000   | 14.42  |
| Q61334 | B-cell receptor-associated protein 29 OS=Mus musculus GN=Bcap29 PE=1 SV=1             | 5.8333333 | 1  | 1   | 1  | 27.946 | 9.72  | 1500000   |          |           | 0.00   |
| P04925 | Major prion protein OS=Mus musculus GN=Prnp PE=1 SV=2                                 | 16.929134 | 5  | 20  | 5  | 27.961 | 9.33  | 3100000   | 4300000  | 3400000   | 47.72  |
| P40630 | Transcription factor A, mitochondrial OS=Mus musculus GN=Tfam PE=1 SV=2               | 7.81893   | 2  | 4   | 2  | 27.97  | 9.69  | 2500000   | 1300000  | 1700000   | 9.93   |
| Q9WVJ5 | Beta-crystallin B1 OS=Mus musculus GN=Crybb1 PE=1 SV=3                                | 5.6       | 1  | 1   | 1  | 27.985 | 7.3   |           | 360000   |           | 2.34   |
| P62918 | 60S ribosomal protein L8 OS=Mus musculus GN=Rpl8 PE=1 SV=2                            | 16.342412 | 4  | 12  | 4  | 28.007 | 11.03 | 13000000  | 5600000  | 6800000   | 34.53  |
| P97765 | WW domain-binding protein 2 OS=Mus musculus GN=Wbp2 PE=1 SV=1                         | 5.3639847 | 1  | 3   | 1  | 28.013 | 6.33  | 420000    |          | 2300000   | 8.19   |
| Q99KX1 | Myeloid leukemia factor 2 OS=Mus musculus GN=Mlf2 PE=1 SV=1                           | 12.145749 | 2  | 3   | 2  | 28.037 | 6.98  | 1700000   | 7700000  |           | 7.93   |
| Q80X85 | 28S ribosomal protein S7, mitochondrial OS=Mus musculus GN=Mrps7 PE=1 SV=1            | 4.9586777 | 1  | 1   | 1  | 28.045 | 9.94  | 1600000   |          |           | 3.40   |
| Q9CQV8 | 14-3-3 protein beta/alpha OS=Mus musculus GN=Ywhab PE=1 SV=3                          | 62.601626 | 15 | 79  | 9  | 28.069 | 4.83  | 110000000 | 71000000 | 120000000 | 253.17 |
| Q9D172 | ES1 protein homolog, mitochondrial OS=Mus musculus GN=D10Jhu81e PE=1 SV=1             | 3.7593985 | 1  | 1   | 1  | 28.073 | 8.78  |           |          | 3300000   | 2.20   |
| P20108 | Thioredoxin-dependent peroxide reductase, mitochondrial OS=Mus musculus GN=Prdx3      | 3.1128405 | 1  | 1   | 1  | 28.109 | 7.58  | 5000000   |          |           | 2.52   |
| Q9CQE8 | UPF0568 protein C14orf166 homolog OS=Mus musculus PE=1 SV=1                           | 14.344262 | 3  | 5   | 3  | 28.135 | 6.89  | 3300000   | 1700000  | 2500000   | 13.36  |
| P68510 | 14-3-3 protein eta OS=Mus musculus GN=Ywhah PE=1 SV=2                                 | 64.634146 | 15 | 56  | 11 | 28.194 | 4.89  | 69000000  | 60000000 | 88000000  | 181.19 |
| Q8BXV2 | BRI3-binding protein OS=Mus musculus GN=Bri3bp PE=1 SV=1                              | 9.0909091 | 2  | 6   | 2  | 28.245 | 9.52  | 4500000   | 1000000  | 2100000   | 15.77  |
| Q61885 | Myelin-oligodendrocyte glycoprotein OS=Mus musculus GN=Mog PE=1 SV=1                  | 7.7235772 | 2  | 4   | 2  | 28.253 | 7.96  | 350000    | 11000000 | 25000000  | 9.90   |
| P61982 | 14-3-3 protein gamma OS=Mus musculus GN=Ywhag PE=1 SV=2                               | 56.680162 | 14 | 87  | 8  | 28.285 | 4.89  | 160000000 | 99000000 | 190000000 | 261.49 |
| Q8CCM6 | Mitochondrial import inner membrane translocase subunit Tim21 OS=Mus musculus GN=     | 4.0160643 | 1  | 1   | 1  | 28.286 | 10.3  |           |          | 1200000   | 2.35   |
| P57746 | V-type proton ATPase subunit D OS=Mus musculus GN=Atp6v1d PE=1 SV=1                   | 28.744939 | 6  | 21  | 6  | 28.351 | 9.45  | 17000000  | 7800000  | 14000000  | 69.15  |
| Q8QZT2 | Centriole, cilia and spindle-associated protein OS=Mus musculus GN=Ccsap PE=1 SV=1    | 15.079365 | 3  | 7   | 3  | 28.361 | 9.22  | 2500000   | 1200000  | 4700000   | 16.91  |
| O70435 | Proteasome subunit alpha type-3 OS=Mus musculus GN=Psm3 PE=1 SV=3                     | 12.156863 | 3  | 9   | 3  | 28.387 | 5.44  | 7700000   | 4200000  | 7000000   | 23.05  |
| Q8VCD6 | Receptor expression-enhancing protein 2 OS=Mus musculus GN=Reep2 PE=1 SV=2            | 13.385827 | 3  | 5   | 3  | 28.419 | 9.41  | 1700000   |          | 2900000   | 12.27  |
| O88456 | Calpain small subunit 1 OS=Mus musculus GN=Capns1 PE=1 SV=1                           | 11.895911 | 3  | 7   | 3  | 28.445 | 5.63  | 2900000   | 4000000  | 4700000   | 21.42  |
| Q6IRU2 | Tropomyosin alpha-4 chain OS=Mus musculus GN=Tpm4 PE=1 SV=3                           | 21.370968 | 5  | 13  | 3  | 28.45  | 4.68  | 2100000   | 1500000  | 3000000   | 37.25  |
| O55234 | Proteasome subunit beta type-5 OS=Mus musculus GN=Psb5 PE=1 SV=3                      | 12.878788 | 3  | 9   | 3  | 28.514 | 7.02  | 8700000   | 3000000  | 3000000   | 28.21  |
| O35381 | Acidic leucine-rich nuclear phosphoprotein 32 family member A OS=Mus musculus GN=A    | 19.838057 | 5  | 13  | 2  | 28.52  | 4.07  | 18000000  | 7600000  | 18000000  | 31.75  |
| P62754 | 40S ribosomal protein S6 OS=Mus musculus GN=Rps6 PE=1 SV=1                            | 14.457831 | 3  | 14  | 3  | 28.663 | 10.84 | 25000000  | 5400000  | 10000000  | 42.81  |
| Q9QYB1 | Chloride intracellular channel protein 4 OS=Mus musculus GN=Clic4 PE=1 SV=3           | 6.3241107 | 1  | 1   | 1  | 28.711 | 5.59  |           |          | 550000    | 3.71   |
| Q6PHZ8 | Kv channel-interacting protein 4 OS=Mus musculus GN=Kcni4 PE=1 SV=1                   | 11.2      | 2  | 2   | 2  | 28.737 | 5.21  |           | 400000   | 2400000   | 2.49   |
| P57759 | Endoplasmic reticulum resident protein 29 OS=Mus musculus GN=Erp29 PE=1 SV=2          | 6.870229  | 2  | 5   | 2  | 28.805 | 6.15  | 1400000   | 330000   | 1100000   | 11.03  |
| Q9DBJ1 | Phosphoglycerate mutase 1 OS=Mus musculus GN=Pgam1 PE=1 SV=3                          | 35.433071 | 6  | 23  | 6  | 28.814 | 7.18  | 12000000  | 5500000  | 11000000  | 71.70  |
| Q9ESJ7 | Interleukin-1 receptor-associated kinase 1-binding protein 1 OS=Mus musculus GN=Irak1 | 4.6332046 | 1  | 2   | 1  | 28.843 | 8.32  | 2600000   |          | 1600000   | 4.25   |
| P13717 | SWISS-PROT:P13717 Nuclease - Serratia marcescens. x                                   | 24.81203  | 5  | 14  | 5  | 28.927 | 7.42  | 3200000   | 2300000  | 4000000   | 41.20  |
| Q9CQQ7 | ATP synthase F(0) complex subunit B1, mitochondrial OS=Mus musculus GN=Atp5f1 PE=     | 19.921875 | 8  | 30  | 8  | 28.93  | 9.06  | 59000000  | 26000000 | 71000000  | 86.18  |
| Q8BIG7 | Catechol O-methyltransferase domain-containing protein 1 OS=Mus musculus GN=Comt      | 8.0152672 | 2  | 4   | 2  | 28.943 | 8.32  | 2600000   | 1300000  | 2200000   | 10.93  |
| Q9JKK1 | Syntaxin-6 OS=Mus musculus GN=Stx6 PE=1 SV=1                                          | 7.4509804 | 1  | 2   | 1  | 28.979 | 4.92  |           | 450000   | 730000    | 8.83   |
| Q8BQP9 | Regulator of G-protein signaling 7-binding protein OS=Mus musculus GN=Rgs7bp PE=1 S   | 9.7276265 | 2  | 3   | 2  | 29.005 | 8.46  | 1300000   |          | 820000    | 8.37   |
| P00920 | Carbonic anhydrase 2 OS=Mus musculus GN=Ca2 PE=1 SV=4                                 | 17.307692 | 3  | 7   | 3  | 29.015 | 7.01  | 3400000   | 1500000  | 3300000   | 18.43  |
| P99026 | Proteasome subunit beta type-4 OS=Mus musculus GN=Psb4 PE=1 SV=1                      | 12.121212 | 2  | 4   | 2  | 29.097 | 5.64  | 8200000   | 6100000  | 6100000   | 10.10  |
| P62259 | 14-3-3 protein epsilon OS=Mus musculus GN=Ywhae PE=1 SV=1                             | 65.098039 | 17 | 117 | 15 | 29.155 | 4.74  | 110000000 | 96000000 | 140000000 | 353.63 |
| O70152 | Dolichol-phosphate mannosyltransferase subunit 1 OS=Mus musculus GN=Dpm1 PE=1 S       | 5.3846154 | 1  | 3   | 1  | 29.156 | 9.51  | 2000000   | 680000   | 830000    | 10.15  |
| Q91XR9 | Phospholipid hydroperoxide glutathione peroxidase, nuclear OS=Mus musculus GN=Gpx     | 17.391304 | 4  | 10  | 4  | 29.234 | 10.2  | 3000000   | 720000   | 3100000   | 27.09  |
| Q78IK4 | MICOS complex subunit Mic27 OS=Mus musculus GN=Apool PE=1 SV=1                        | 5.6603774 | 1  | 1   | 1  | 29.242 | 9.31  |           | 2400000  |           | 3.15   |

|        |                                                                                         |           |    |    |    |        |       |           |          |           |        |
|--------|-----------------------------------------------------------------------------------------|-----------|----|----|----|--------|-------|-----------|----------|-----------|--------|
| Q8K2J7 | RELT-like protein 1 OS=Mus musculus GN=Rell1 PE=2 SV=2                                  | 3.3088235 | 1  | 1  | 1  | 29.333 | 7.85  | 830000    |          |           | 1.97   |
| Q9CR68 | Cytochrome b-c1 complex subunit Rieske, mitochondrial OS=Mus musculus GN=Uqcrcf1        | 15.328467 | 8  | 23 | 8  | 29.349 | 8.7   | 66000000  | 39000000 | 68000000  | 62.53  |
| Q5M956 | BTB/POZ domain-containing protein KCTD1 OS=Mus musculus GN=Kctd1 PE=1 SV=1              | 12.062257 | 1  | 1  | 1  | 29.386 | 7.08  |           | 710000   |           | 0.00   |
| Q8BGX2 | Uncharacterized protein C19orf52 homolog OS=Mus musculus PE=1 SV=1                      | 11.278195 | 2  | 4  | 2  | 29.397 | 6.73  | 2100000   | 1600000  | 2200000   | 15.40  |
| O08579 | Emerin OS=Mus musculus GN=Emd PE=1 SV=1                                                 | 19.305019 | 4  | 11 | 4  | 29.417 | 5.01  | 4100000   | 3800000  | 5200000   | 34.06  |
| Q9DC71 | 28S ribosomal protein S15, mitochondrial OS=Mus musculus GN=Mrps15 PE=1 SV=2            | 5.8139535 | 1  | 1  | 1  | 29.445 | 10.13 |           | 1600000  |           | 3.28   |
| Q9R1P0 | Proteasome subunit alpha type-4 OS=Mus musculus GN=Psm4 PE=1 SV=1                       | 6.8965517 | 2  | 6  | 2  | 29.452 | 7.72  | 4100000   | 2200000  | 3700000   | 14.99  |
| O88587 | Catechol O-methyltransferase OS=Mus musculus GN=Comt PE=1 SV=2                          | 3.7735849 | 1  | 1  | 1  | 29.467 | 5.83  | 1500000   |          |           | 2.69   |
| Q66JS6 | Eukaryotic translation initiation factor 3 subunit J-B OS=Mus musculus GN=Eif3j2 PE=1 S | 19.771863 | 4  | 10 | 4  | 29.468 | 4.81  | 5100000   | 4000000  | 7400000   | 30.75  |
| Q9R1P4 | Proteasome subunit alpha type-1 OS=Mus musculus GN=Psm1 PE=1 SV=1                       | 25.475285 | 6  | 13 | 6  | 29.528 | 6.46  | 8300000   | 5500000  | 3700000   | 37.38  |
| P62702 | 40S ribosomal protein S4, X isoform OS=Mus musculus GN=Rps4x PE=1 SV=2                  | 31.558935 | 7  | 15 | 7  | 29.579 | 10.15 | 14000000  | 5800000  | 8800000   | 43.23  |
| P97822 | Acidic leucine-rich nuclear phosphoprotein 32 family member E OS=Mus musculus GN=A      | 11.923077 | 1  | 1  | 1  | 29.604 | 3.88  |           |          |           | 2.24   |
| Q9CR95 | Adaptin ear-binding coat-associated protein 1 OS=Mus musculus GN=Necap1 PE=1 SV=        | 6.5454545 | 2  | 5  | 2  | 29.621 | 6.38  | 5000000   | 4100000  | 7800000   | 10.61  |
| P26645 | Myristoylated alanine-rich C-kinase substrate OS=Mus musculus GN=Marcks PE=1 SV=2       | 67.313916 | 12 | 71 | 12 | 29.644 | 4.34  | 140000000 | 57000000 | 140000000 | 334.23 |
| Q6P1B3 | PILR alpha-associated neural protein OS=Mus musculus GN=Piapn PE=1 SV=1                 | 3.2374101 | 1  | 1  | 1  | 29.725 | 8.72  |           | 480000   |           | 2.19   |
| O88441 | Metaxin-2 OS=Mus musculus GN=Mtx2 PE=1 SV=1                                             | 9.1254753 | 2  | 5  | 2  | 29.739 | 5.63  | 1500000   | 1300000  | 1800000   | 16.77  |
| O88696 | ATP-dependent Clp protease proteolytic subunit, mitochondrial OS=Mus musculus GN=C      | 6.6176471 | 1  | 3  | 1  | 29.781 | 7.47  | 1900000   | 2700000  |           | 8.30   |
| Q6NZB0 | DnaJ homolog subfamily C member 8 OS=Mus musculus GN=Dnajc8 PE=1 SV=2                   | 3.1620553 | 1  | 1  | 1  | 29.794 | 9.06  |           |          | 2000000   | 1.93   |
| O70439 | Syntaxin-7 OS=Mus musculus GN=Stx7 PE=1 SV=3                                            | 11.111111 | 2  | 4  | 2  | 29.802 | 5.78  | 3700000   | 1900000  | 1400000   | 11.67  |
| P67778 | Prohibitin OS=Mus musculus GN=Phb PE=1 SV=1                                             | 15.073529 | 4  | 11 | 4  | 29.802 | 5.76  | 16000000  | 13000000 | 18000000  | 29.10  |
| Q91VN4 | MICOS complex subunit Mic25 OS=Mus musculus GN=Chchd6 PE=1 SV=2                         | 13.919414 | 3  | 9  | 3  | 29.833 | 8.41  | 5300000   | 3600000  | 7100000   | 32.56  |
| P97351 | 40S ribosomal protein S3a OS=Mus musculus GN=Rps3a PE=1 SV=3                            | 22.727273 | 6  | 21 | 6  | 29.866 | 9.73  | 14000000  | 7300000  | 10000000  | 51.64  |
| P70195 | Proteasome subunit beta type-7 OS=Mus musculus GN=Psm7 PE=1 SV=1                        | 10.830325 | 3  | 6  | 3  | 29.872 | 7.99  | 3300000   | 2300000  | 4400000   | 15.25  |
| Q9ERQ8 | Carbonic anhydrase 7 OS=Mus musculus GN=Ca7 PE=1 SV=2                                   | 4.1666667 | 1  | 1  | 1  | 29.896 | 6.95  |           |          | 390000    | 2.80   |
| P00416 | Cytochrome c oxidase subunit 3 OS=Mus musculus GN=mt-Co3 PE=1 SV=2                      | 5.3639847 | 1  | 7  | 1  | 29.903 | 7.3   | 17000000  | 12000000 | 19000000  | 24.35  |
| P12970 | 60S ribosomal protein L7a OS=Mus musculus GN=Rpl7a PE=1 SV=2                            | 30.451128 | 8  | 17 | 8  | 29.958 | 10.56 | 23000000  | 8700000  | 14000000  | 46.45  |
| P12658 | Calbindin OS=Mus musculus GN=Calb1 PE=1 SV=2                                            | 4.5977011 | 1  | 2  | 1  | 29.975 | 4.83  | 1000000   | 540000   |           | 5.97   |
| Q61792 | LIM and SH3 domain protein 1 OS=Mus musculus GN=Lasp1 PE=1 SV=1                         | 25.475285 | 7  | 21 | 7  | 29.975 | 7.05  | 7500000   | 6200000  | 7800000   | 60.74  |
| Q61166 | Microtubule-associated protein RP/EB family member 1 OS=Mus musculus GN=Mapre1 F        | 13.432836 | 3  | 7  | 2  | 29.997 | 5.22  | 2400000   | 1300000  | 1900000   | 16.75  |
| Q8BZJ7 | DCN1-like protein 2 OS=Mus musculus GN=Dcun1d2 PE=1 SV=3                                | 6.5637066 | 1  | 1  | 1  | 30.049 | 5.59  |           |          | 300000    | 2.22   |
| P60202 | Myelin proteolipid protein OS=Mus musculus GN=Plp1 PE=1 SV=2                            | 18.772563 | 5  | 23 | 5  | 30.057 | 8.35  | 130000000 | 50000000 | 98000000  | 58.42  |
| Q9QZ73 | DCN1-like protein 1 OS=Mus musculus GN=Dcun1d1 PE=1 SV=1                                | 6.5637066 | 1  | 1  | 1  | 30.078 | 5.34  |           | 180000   |           | 1.89   |
| Q9DCT2 | NADH dehydrogenase [ubiquinone] iron-sulfur protein 3, mitochondrial OS=Mus musculus    | 30.798479 | 8  | 22 | 8  | 30.131 | 7.17  | 21000000  | 17000000 | 21000000  | 72.18  |
| Q6PAM0 | 5'-AMP-activated protein kinase subunit beta-2 OS=Mus musculus GN=Prkab2 PE=1 SV=       | 6.6420664 | 1  | 2  | 1  | 30.19  | 6.46  |           | 490000   | 1000000   | 7.05   |
| Q9CZ04 | COP9 signalosome complex subunit 7a OS=Mus musculus GN=Cops7a PE=1 SV=2                 | 4.3636364 | 1  | 3  | 1  | 30.206 | 7.87  | 2100000   | 900000   | 1700000   | 8.03   |
| O89051 | Integral membrane protein 2B OS=Mus musculus GN=Itm2b PE=1 SV=1                         | 3.3834586 | 1  | 1  | 1  | 30.24  | 5.3   |           | 1600000  |           | 2.40   |
| P62080 | Tetraspanin-5 OS=Mus musculus GN=Tspan5 PE=2 SV=1                                       | 5.9701493 | 1  | 2  | 1  | 30.317 | 4.78  | 450000    |          |           | 4.87   |
| Q9QZ06 | Toll-interacting protein OS=Mus musculus GN=Tollip PE=1 SV=1                            | 5.1094891 | 1  | 3  | 1  | 30.325 | 5.17  | 2200000   | 1300000  | 2100000   | 11.64  |
| O55023 | Inositol monophosphatase 1 OS=Mus musculus GN=Impa1 PE=1 SV=1                           | 3.9711191 | 1  | 3  | 1  | 30.416 | 5.19  | 1700000   | 1700000  | 2400000   | 6.06   |
| Q9CX86 | Heterogeneous nuclear ribonucleoprotein A0 OS=Mus musculus GN=Hnrnpa0 PE=1 SV=          | 6.557377  | 1  | 3  | 1  | 30.512 | 9.31  | 9800000   | 2000000  | 7200000   | 12.21  |
| Q9DAU1 | Protein canopy homolog 3 OS=Mus musculus GN=Cnpy3 PE=1 SV=1                             | 6.884058  | 1  | 1  | 1  | 30.519 | 5.62  |           |          | 480000    | 4.19   |
| Q91VJ5 | Polyglutamine-binding protein 1 OS=Mus musculus GN=Pqbp1 PE=1 SV=1                      | 9.8859316 | 1  | 1  | 1  | 30.579 | 6.23  |           |          | 1500000   | 5.56   |
| Q9QYI5 | DnaJ homolog subfamily B member 2 OS=Mus musculus GN=Dnajb2 PE=1 SV=2                   | 12.274368 | 3  | 9  | 2  | 30.596 | 4.98  | 3800000   | 1800000  | 3800000   | 26.15  |
| P48758 | Carbonyl reductase [NADPH] 1 OS=Mus musculus GN=Cbr1 PE=1 SV=3                          | 19.494585 | 3  | 6  | 3  | 30.622 | 8.31  | 3700000   |          | 4300000   | 19.63  |
| Q60931 | Voltage-dependent anion-selective channel protein 3 OS=Mus musculus GN=Vdac3 PE=        | 21.908127 | 6  | 19 | 5  | 30.733 | 8.79  | 23000000  | 19000000 | 21000000  | 57.15  |
| Q8BL97 | Serine/arginine-rich splicing factor 7 OS=Mus musculus GN=Srsf7 PE=1 SV=1               | 12.359551 | 3  | 8  | 2  | 30.799 | 11.9  | 6400000   |          | 5600000   | 22.54  |
| Q99020 | Heterogeneous nuclear ribonucleoprotein A/B OS=Mus musculus GN=Hnrnpab PE=1 SV=         | 12.982456 | 3  | 11 | 2  | 30.812 | 7.91  | 12000000  | 4700000  | 9300000   | 33.43  |
| Q9D061 | Acyl-CoA-binding domain-containing protein 6 OS=Mus musculus GN=Acbd6 PE=1 SV=2         | 4.964539  | 1  | 1  | 1  | 30.868 | 5.11  |           |          | 750000    | 2.46   |

|        |                                                                                                           |           |    |    |    |        |       |           |           |           |        |
|--------|-----------------------------------------------------------------------------------------------------------|-----------|----|----|----|--------|-------|-----------|-----------|-----------|--------|
| Q35326 | Serine/arginine-rich splicing factor 5 OS=Mus musculus GN=Srsf5 PE=1 SV=2                                 | 25.27881  | 6  | 11 | 5  | 30.873 | 11.56 | 7200000   |           | 4600000   | 32.85  |
| Q9JJ69 | Kv channel-interacting protein 2 OS=Mus musculus GN=Kcnp2 PE=1 SV=2                                       | 5.1851852 | 1  | 1  | 1  | 30.926 | 5.05  |           |           | 720000    | 2.24   |
| O35658 | Complement component 1 Q subcomponent-binding protein, mitochondrial OS=Mus musculus GN=Cc1q2b PE=1 SV=1  | 15.107914 | 4  | 14 | 4  | 30.994 | 4.92  | 10000000  | 8700000   | 17000000  | 48.70  |
| Q9EST5 | Acidic leucine-rich nuclear phosphoprotein 32 family member B OS=Mus musculus GN=Alp32b PE=1 SV=1         | 13.602941 | 4  | 10 | 1  | 31.06  | 4.01  | 1900000   | 4800000   | 11000000  | 23.57  |
| Q9DC07 | LIM zinc-binding domain-containing Nebulette OS=Mus musculus GN=Neb1 PE=1 SV=1                            | 15.185185 | 3  | 4  | 3  | 31.093 | 8.31  | 3800000   | 2400000   | 220000    | 12.22  |
| P35802 | Neuronal membrane glycoprotein M6-a OS=Mus musculus GN=Gpm6a PE=1 SV=1                                    | 13.309353 | 5  | 26 | 5  | 31.128 | 5.27  | 140000000 | 90000000  | 170000000 | 89.32  |
| P24668 | Cation-dependent mannose-6-phosphate receptor OS=Mus musculus GN=M6pr PE=1 SV=1                           | 18.345324 | 5  | 9  | 5  | 31.152 | 5.39  | 7800000   | 3500000   | 2800000   | 26.02  |
| Q80X71 | Transmembrane protein 106B OS=Mus musculus GN=Tmem106b PE=1 SV=1                                          | 4.7272727 | 1  | 1  | 1  | 31.153 | 6.68  |           |           |           | 2.08   |
| Q8C996 | Transmembrane protein 163 OS=Mus musculus GN=Tmem163 PE=1 SV=1                                            | 9.0277778 | 1  | 2  | 1  | 31.173 | 7.93  | 550000    |           |           | 6.40   |
| Q9ER00 | Syntaxin-12 OS=Mus musculus GN=Stx12 PE=1 SV=1                                                            | 8.7591241 | 2  | 6  | 2  | 31.176 | 5.44  | 4800000   | 2200000   | 3200000   | 18.80  |
| P25444 | 40S ribosomal protein S2 OS=Mus musculus GN=Rps2 PE=1 SV=3                                                | 32.423208 | 9  | 18 | 9  | 31.212 | 10.24 | 10000000  | 4700000   | 7000000   | 43.57  |
| Q9D7A8 | Armadillo repeat-containing protein 1 OS=Mus musculus GN=Armc1 PE=1 SV=1                                  | 9.2198582 | 2  | 4  | 2  | 31.227 | 5.57  | 1600000   | 1100000   | 1500000   | 12.24  |
| O54901 | OX-2 membrane glycoprotein OS=Mus musculus GN=Cd200 PE=1 SV=1                                             | 8.6330935 | 2  | 8  | 2  | 31.236 | 8.79  | 9000000   | 6400000   | 7600000   | 20.97  |
| Q7TQI3 | Ubiquitin thioesterase OTUB1 OS=Mus musculus GN=Otub1 PE=1 SV=2                                           | 16.605166 | 3  | 7  | 3  | 31.25  | 4.94  | 5100000   | 870000    | 3900000   | 23.10  |
| P57776 | Elongation factor 1-delta OS=Mus musculus GN=Eef1d PE=1 SV=3                                              | 30.604982 | 6  | 14 | 5  | 31.274 | 5.02  | 6000000   | 2500000   | 4500000   | 39.87  |
| Q9R0P3 | S-formylglutathione hydrolase OS=Mus musculus GN=Esd PE=1 SV=1                                            | 4.2553191 | 1  | 2  | 1  | 31.299 | 7.12  | 3000000   |           | 2200000   | 4.80   |
| P47757 | F-actin-capping protein subunit beta OS=Mus musculus GN=Capzb PE=1 SV=3                                   | 35.379061 | 8  | 22 | 8  | 31.326 | 5.74  | 11000000  | 5500000   | 9400000   | 59.32  |
| Q08331 | Calretinin OS=Mus musculus GN=Calb2 PE=1 SV=3                                                             | 9.9630996 | 2  | 4  | 2  | 31.353 | 5.02  | 1300000   | 360000    | 910000    | 11.20  |
| Q9CWS0 | N(G),N(G)-dimethylarginine dimethylaminohydrolase 1 OS=Mus musculus GN=Ddah1 PE=1 SV=1                    | 29.824561 | 7  | 19 | 7  | 31.361 | 5.97  | 11000000  | 3800000   | 12000000  | 56.71  |
| O35449 | Proline-rich transmembrane protein 1 OS=Mus musculus GN=Prrt1 PE=1 SV=1                                   | 3.5947712 | 1  | 1  | 1  | 31.369 | 7.65  |           | 1000000   |           | 2.40   |
| Q8VBT0 | Thioredoxin-related transmembrane protein 1 OS=Mus musculus GN=Tmx1 PE=1 SV=1                             | 6.8345324 | 2  | 2  | 2  | 31.376 | 5.29  |           |           | 1500000   | 4.93   |
| P14148 | 60S ribosomal protein L7 OS=Mus musculus GN=Rpl7 PE=1 SV=2                                                | 24.074074 | 8  | 20 | 8  | 31.4   | 10.89 | 21000000  | 9100000   | 8800000   | 57.29  |
| Q8BH95 | Enoyl-CoA hydratase, mitochondrial OS=Mus musculus GN=Echs1 PE=1 SV=1                                     | 17.241379 | 4  | 6  | 4  | 31.454 | 8.48  | 2400000   | 1600000   | 2200000   | 17.52  |
| O35083 | 1-acyl-sn-glycerol-3-phosphate acyltransferase alpha OS=Mus musculus GN=Agpat1 PE=1 SV=1                  | 8.0701754 | 2  | 5  | 2  | 31.689 | 9.14  | 2400000   | 830000    | 1200000   | 12.99  |
| Q9D387 | Lysosome-associated membrane glycoprotein 5 OS=Mus musculus GN=Lamp5 PE=1 SV=1                            | 3.5714286 | 1  | 3  | 1  | 31.701 | 6.14  | 4700000   | 2900000   | 4800000   | 9.52   |
| Q9CWE0 | Mitochondrial fission regulator 1-like OS=Mus musculus GN=Mtfr1l PE=1 SV=1                                | 14.186851 | 3  | 8  | 3  | 31.706 | 6.1   | 2100000   | 1100000   | 2500000   | 21.76  |
| Q60930 | Voltage-dependent anion-selective channel protein 2 OS=Mus musculus GN=Vdac2 PE=1 SV=1                    | 32.20339  | 7  | 27 | 7  | 31.713 | 7.49  | 85000000  | 64000000  | 85000000  | 89.99  |
| Q9CQA3 | Succinate dehydrogenase [ubiquinone] iron-sulfur subunit, mitochondrial OS=Mus musculus GN=Sdhb PE=1 SV=1 | 24.113475 | 7  | 16 | 7  | 31.793 | 8.68  | 17000000  | 4800000   | 13000000  | 42.32  |
| P97447 | Four and a half LIM domains protein 1 OS=Mus musculus GN=Fhl1 PE=1 SV=3                                   | 4.2857143 | 1  | 3  | 1  | 31.867 | 8.37  | 1800000   | 460000    | 1300000   | 8.40   |
| P53810 | Phosphatidylinositol transfer protein alpha isoform OS=Mus musculus GN=Ptgpa PE=1 SV=1                    | 18.081181 | 4  | 6  | 4  | 31.873 | 6.37  | 5700000   | 2200000   | 5900000   | 21.31  |
| Q6PER3 | Microtubule-associated protein RP/EB family member 3 OS=Mus musculus GN=Mapre3 PE=1 SV=1                  | 15.658363 | 4  | 14 | 3  | 31.946 | 5.54  | 10000000  | 4800000   | 7000000   | 37.17  |
| Q8BX10 | Serine/threonine-protein phosphatase PGAM5, mitochondrial OS=Mus musculus GN=Pgam5 PE=1 SV=1              | 3.125     | 1  | 1  | 1  | 31.975 | 9.04  |           | 470000    |           | 2.42   |
| Q9Z1R4 | Uncharacterized protein C6orf47 homolog OS=Mus musculus GN=D17h6s53e PE=1 SV=1                            | 4.0955631 | 1  | 1  | 1  | 31.995 | 6.89  | 2200000   |           |           | 1.93   |
| Q9CY50 | Translocon-associated protein subunit alpha OS=Mus musculus GN=Ssr1 PE=1 SV=1                             | 11.888112 | 2  | 8  | 2  | 32.045 | 4.45  | 7400000   | 2000000   | 4300000   | 24.10  |
| O70433 | Four and a half LIM domains protein 2 OS=Mus musculus GN=Fhl2 PE=1 SV=1                                   | 11.469534 | 2  | 4  | 2  | 32.051 | 7.3   |           | 720000    | 1300000   | 11.61  |
| Q3TDK6 | Protein rogdi homolog OS=Mus musculus GN=Rogdi PE=1 SV=2                                                  | 5.2264808 | 1  | 3  | 1  | 32.08  | 8.18  | 3500000   | 2100000   | 3100000   | 12.34  |
| Q5EBJ4 | Ermin OS=Mus musculus GN=Ermn PE=1 SV=1                                                                   | 4.9822064 | 1  | 3  | 1  | 32.128 | 4.59  | 2500000   | 1800000   | 3700000   | 11.15  |
| O08600 | Endonuclease G, mitochondrial OS=Mus musculus GN=Endog PE=1 SV=1                                          | 5.7823129 | 1  | 1  | 1  | 32.171 | 9.54  |           |           |           | 2.85   |
| P17751 | Triosephosphate isomerase OS=Mus musculus GN=Tpi1 PE=1 SV=4                                               | 30.434783 | 7  | 27 | 7  | 32.171 | 5.74  | 8400000   | 5300000   | 10000000  | 84.96  |
| Q8CDN6 | Thioredoxin-like protein 1 OS=Mus musculus GN=Txn1l PE=1 SV=3                                             | 11.072664 | 2  | 5  | 2  | 32.217 | 4.96  | 2100000   | 1800000   | 2500000   | 16.01  |
| Q8CCS6 | Polyadenylate-binding protein 2 OS=Mus musculus GN=Pabpn1 PE=1 SV=3                                       | 3.6423841 | 1  | 3  | 1  | 32.277 | 5.17  | 2000000   | 810000    | 1200000   | 9.15   |
| Q924T2 | 28S ribosomal protein S2, mitochondrial OS=Mus musculus GN=Mrps2 PE=1 SV=1                                | 7.2164948 | 1  | 1  | 1  | 32.293 | 9.14  | 600000    |           |           | 2.75   |
| Q6ZQI3 | Malectin OS=Mus musculus GN=Mlec PE=1 SV=2                                                                | 24.742268 | 6  | 15 | 6  | 32.322 | 6.05  | 4200000   | 2100000   | 3300000   | 44.30  |
| Q60932 | Voltage-dependent anion-selective channel protein 1 OS=Mus musculus GN=Vdac1 PE=1 SV=1                    | 52.702703 | 15 | 73 | 14 | 32.331 | 8.43  | 220000000 | 180000000 | 250000000 | 257.04 |
| Q8BTF8 | RNA-binding Raly-like protein OS=Mus musculus GN=Raly1 PE=2 SV=1                                          | 3.0716724 | 1  | 1  | 1  | 32.432 | 7.93  | 1200000   |           |           | 2.43   |
| P10923 | Osteopontin OS=Mus musculus GN=Spp1 PE=1 SV=1                                                             | 3.0612245 | 1  | 1  | 1  | 32.44  | 4.53  | 2900000   |           |           | 2.80   |
| B1AXV0 | DOMON domain-containing protein FRRS1L OS=Mus musculus GN=Frrs1l PE=1 SV=1                                | 12.627986 | 3  | 13 | 3  | 32.486 | 5.43  | 4500000   | 4100000   | 5500000   | 32.98  |
| Q61937 | Nucleophosmin OS=Mus musculus GN=Npm1 PE=1 SV=1                                                           | 23.630137 | 5  | 11 | 5  | 32.54  | 4.77  | 18000000  |           | 20000000  | 42.54  |

|        |                                                                                       |           |    |    |    |        |      |           |          |           |        |
|--------|---------------------------------------------------------------------------------------|-----------|----|----|----|--------|------|-----------|----------|-----------|--------|
| Q9DC16 | Endoplasmic reticulum-Golgi intermediate compartment protein 1 OS=Mus musculus GN=    | 3.1034483 | 1  | 1  | 1  | 32.541 | 7.06 | 3500000   |          |           | 1.94   |
| P58771 | Tropomyosin alpha-1 chain OS=Mus musculus GN=Tpm1 PE=1 SV=1                           | 29.225352 | 9  | 31 | 4  | 32.661 | 4.74 | 29000000  | 17000000 | 37000000  | 92.16  |
| P58774 | Tropomyosin beta chain OS=Mus musculus GN=Tpm2 PE=1 SV=1                              | 15.84507  | 6  | 14 | 1  | 32.817 | 4.7  | 1300000   | 450000   | 1100000   | 41.45  |
| P14206 | 40S ribosomal protein SA OS=Mus musculus GN=Rpsa PE=1 SV=4                            | 20.677966 | 4  | 12 | 4  | 32.817 | 4.87 | 4100000   | 4000000  | 5000000   | 38.30  |
| Q8R164 | Valacyclovir hydrolase OS=Mus musculus GN=Bph1 PE=1 SV=1                              | 4.467354  | 1  | 1  | 1  | 32.83  | 8.94 |           | 470000   |           | 2.49   |
| Q9EQ06 | Estradiol 17-beta-dehydrogenase 11 OS=Mus musculus GN=Hsd17b11 PE=1 SV=1              | 3.6912752 | 1  | 1  | 1  | 32.86  | 8.66 | 1800000   |          |           | 2.68   |
| Q91VR2 | ATP synthase subunit gamma, mitochondrial OS=Mus musculus GN=Atp5c1 PE=1 SV=1         | 29.530201 | 8  | 25 | 8  | 32.865 | 9.01 | 49000000  | 33000000 | 44000000  | 67.65  |
| P48962 | ADP/ATP translocase 1 OS=Mus musculus GN=Slc25a4 PE=1 SV=4                            | 5.2441745 | 13 | 44 | 8  | 32.883 | 9.72 | 220000000 | 76000000 | 150000000 | 109.52 |
| Q8R088 | Golgi phosphoprotein 3-like OS=Mus musculus GN=Golph3l PE=1 SV=1                      | 5.2631579 | 1  | 2  | 1  | 32.885 | 5.99 |           | 230000   | 440000    | 5.18   |
| Q9QZE7 | Translin-associated protein X OS=Mus musculus GN=Tsnax PE=1 SV=1                      | 5.862069  | 1  | 3  | 1  | 32.906 | 6.55 | 1200000   | 770000   | 1100000   | 10.13  |
| P51881 | ADP/ATP translocase 2 OS=Mus musculus GN=Slc25a5 PE=1 SV=3                            | 34.563758 | 11 | 33 | 6  | 32.91  | 9.73 | 49000000  | 12000000 | 30000000  | 78.47  |
| Q6PCP5 | Mitochondrial fission factor OS=Mus musculus GN=Mff PE=1 SV=1                         | 7.5601375 | 2  | 4  | 2  | 32.911 | 6.83 | 5900000   | 2600000  | 6200000   | 11.22  |
| O55126 | Protein NipSnap homolog 2 OS=Mus musculus GN=Gbas PE=1 SV=1                           | 4.9822064 | 1  | 1  | 1  | 32.912 | 9.26 |           |          | 1300000   | 2.31   |
| P20352 | Tissue factor OS=Mus musculus GN=F3 PE=1 SV=2                                         | 8.1632653 | 2  | 3  | 2  | 32.914 | 9.32 | 910000    | 610000   |           | 9.15   |
| P47753 | F-actin-capping protein subunit alpha-1 OS=Mus musculus GN=Capza1 PE=1 SV=4           | 5.2447552 | 1  | 2  | 1  | 32.919 | 5.55 |           | 2000000  | 2600000   | 7.00   |
| P47754 | F-actin-capping protein subunit alpha-2 OS=Mus musculus GN=Capza2 PE=1 SV=3           | 33.216783 | 5  | 10 | 5  | 32.947 | 5.85 | 10000000  | 6300000  | 12000000  | 37.54  |
| Q8BHE8 | Uncharacterized protein C2orf47 homolog, mitochondrial OS=Mus musculus PE=1 SV=1      | 9.9656357 | 3  | 7  | 2  | 32.964 | 9.14 | 860000    | 2700000  | 840000    | 16.42  |
| P21107 | Tropomyosin alpha-3 chain OS=Mus musculus GN=Tpm3 PE=1 SV=3                           | 31.929825 | 10 | 32 | 4  | 32.974 | 4.72 | 33000000  | 18000000 | 42000000  | 90.90  |
| Q8CAK3 | Repressor of yield of DENV protein homolog OS=Mus musculus GN=Ryden PE=2 SV=1         | 12.413793 | 2  | 2  | 2  | 32.994 | 7.28 | 430000    |          |           | 6.04   |
| Q9Z2Z6 | Mitochondrial carnitine/acylcarnitine carrier protein OS=Mus musculus GN=Slc25a20 PE= | 2.6578073 | 1  | 3  | 1  | 33.005 | 9.11 | 1400000   | 720000   | 830000    | 6.46   |
| Q6NVE9 | Protein phosphatase PTC7 homolog OS=Mus musculus GN=Pptc7 PE=1 SV=1                   | 4.1935484 | 1  | 1  | 1  | 33.027 | 5.27 |           |          | 830000    | 2.34   |
| O35526 | Syntaxin-1A OS=Mus musculus GN=Stx1a PE=1 SV=3                                        | 51.041667 | 14 | 72 | 13 | 33.034 | 5.24 | 110000000 | 43000000 | 91000000  | 227.22 |
| Q9DCU6 | 39S ribosomal protein L4, mitochondrial OS=Mus musculus GN=Mrpl4 PE=1 SV=1            | 3.7414966 | 1  | 1  | 1  | 33.052 | 9.82 | 930000    |          |           | 2.14   |
| Q61735 | Leukocyte surface antigen CD47 OS=Mus musculus GN=Cd47 PE=1 SV=2                      | 10.891089 | 3  | 13 | 3  | 33.076 | 8.63 | 25000000  | 11000000 | 22000000  | 36.02  |
| Q64012 | RNA-binding protein Raly OS=Mus musculus GN=Raly PE=1 SV=3                            | 16.346154 | 4  | 5  | 4  | 33.168 | 8.84 | 2500000   |          | 1700000   | 13.39  |
| Q9DB05 | Alpha-soluble NSF attachment protein OS=Mus musculus GN=Napa PE=1 SV=1                | 43.050847 | 11 | 31 | 10 | 33.168 | 5.45 | 15000000  | 9800000  | 18000000  | 97.57  |
| P61264 | Syntaxin-1B OS=Mus musculus GN=Stx1b PE=1 SV=1                                        | 58.680556 | 18 | 87 | 17 | 33.224 | 5.38 | 190000000 | 64000000 | 140000000 | 296.83 |
| Q91Z38 | Tetrapeptide repeat protein 1 OS=Mus musculus GN=Ttc1 PE=1 SV=1                       | 9.2465753 | 2  | 4  | 2  | 33.242 | 5.01 | 1000000   | 530000   | 1300000   | 10.96  |
| Q3V2J0 | Protein FAM92B OS=Mus musculus GN=Fam92b PE=2 SV=2                                    | 2.3972603 | 1  | 1  | 1  | 33.254 | 6.11 |           |          |           | 1.81   |
| P49615 | Cyclin-dependent-like kinase 5 OS=Mus musculus GN=Cdk5 PE=1 SV=1                      | 17.808219 | 4  | 7  | 4  | 33.267 | 7.66 | 3800000   | 1500000  | 2700000   | 21.09  |
| O35129 | Prohibitin-2 OS=Mus musculus GN=Phb2 PE=1 SV=1                                        | 27.424749 | 8  | 18 | 8  | 33.276 | 9.83 | 19000000  | 11000000 | 12000000  | 49.05  |
| Q9D0L7 | Armadillo repeat-containing protein 10 OS=Mus musculus GN=Armc10 PE=1 SV=1            | 5.2287582 | 1  | 2  | 1  | 33.29  | 7.99 | 3400000   |          | 2200000   | 7.67   |
| Q9CPV4 | Glyoxalase domain-containing protein 4 OS=Mus musculus GN=Glod4 PE=1 SV=1             | 5.033557  | 1  | 1  | 1  | 33.296 | 5.47 |           | 700000   |           | 3.10   |
| P14231 | Sodium/potassium-transporting ATPase subunit beta-2 OS=Mus musculus GN=Atp1b2 PE=     | 33.103448 | 8  | 21 | 8  | 33.322 | 8.31 | 49000000  | 25000000 | 43000000  | 67.77  |
| O55125 | Protein NipSnap homolog 1 OS=Mus musculus GN=Nipsnap1 PE=1 SV=1                       | 11.267606 | 3  | 8  | 3  | 33.342 | 9.44 | 7500000   | 7100000  | 6200000   | 22.17  |
| Q9EQU5 | Protein SET OS=Mus musculus GN=Set PE=1 SV=1                                          | 17.99308  | 5  | 12 | 5  | 33.358 | 4.32 | 16000000  | 5800000  | 15000000  | 41.98  |
| O35678 | Monoglyceride lipase OS=Mus musculus GN=Mgll PE=1 SV=1                                | 10.891089 | 3  | 6  | 3  | 33.366 | 7.15 | 3900000   | 2300000  | 4000000   | 16.34  |
| Q9JLZ3 | Methylglutaconyl-CoA hydratase, mitochondrial OS=Mus musculus GN=Auh PE=1 SV=1        | 11.783439 | 3  | 6  | 3  | 33.374 | 9.51 | 2500000   | 1700000  | 970000    | 14.79  |
| Q8WTY4 | Anamorsin OS=Mus musculus GN=Ciapin1 PE=1 SV=1                                        | 3.8834951 | 1  | 2  | 1  | 33.408 | 5.2  | 940000    |          | 820000    | 5.04   |
| Q8VD33 | Small glutamine-rich tetrapeptide repeat-containing protein beta OS=Mus musculus GN=  | 9.2105263 | 2  | 4  | 2  | 33.408 | 4.92 | 2900000   | 2000000  | 3600000   | 8.78   |
| Q791V5 | Mitochondrial carrier homolog 2 OS=Mus musculus GN=Mtch2 PE=1 SV=1                    | 17.491749 | 5  | 14 | 5  | 33.477 | 8.25 | 9200000   | 4100000  | 5500000   | 35.74  |
| P47911 | 60S ribosomal protein L6 OS=Mus musculus GN=Rpl6 PE=1 SV=3                            | 17.567568 | 9  | 15 | 9  | 33.489 | 10.7 | 19000000  | 3400000  | 9700000   | 31.67  |
| O54983 | Ketimine reductase mu-crystallin OS=Mus musculus GN=Crym PE=1 SV=1                    | 3.514377  | 1  | 1  | 1  | 33.502 | 5.67 | 1300000   |          |           | 2.26   |
| Q9CY64 | Biliverdin reductase A OS=Mus musculus GN=Blvra PE=1 SV=1                             | 4.7457627 | 1  | 2  | 1  | 33.504 | 7.02 | 220000    |          | 890000    | 5.85   |
| P28663 | Beta-soluble NSF attachment protein OS=Mus musculus GN=Napb PE=1 SV=2                 | 47.986577 | 13 | 53 | 12 | 33.535 | 5.47 | 47000000  | 26000000 | 47000000  | 181.92 |
| Q9Z130 | Heterogeneous nuclear ribonucleoprotein D-like OS=Mus musculus GN=Hnrdpl PE=1 SV=     | 15.946844 | 4  | 13 | 3  | 33.538 | 7.31 | 30000000  | 9400000  | 16000000  | 40.17  |
| Q922Y1 | UBX domain-containing protein 1 OS=Mus musculus GN=Ubxn1 PE=1 SV=1                    | 9.7643098 | 1  | 1  | 1  | 33.552 | 5.26 | 1000000   |          |           | 3.40   |
| Q922Q4 | Pyrraline-5-carboxylate reductase 2 OS=Mus musculus GN=Pycr2 PE=1 SV=1                |           | 5  | 1  | 1  | 33.638 | 7.77 |           | 510000   |           | 2.74   |

|        |                                                                                        |           |    |    |    |        |       |          |          |          |        |
|--------|----------------------------------------------------------------------------------------|-----------|----|----|----|--------|-------|----------|----------|----------|--------|
| P62996 | Transformer-2 protein homolog beta OS=Mus musculus GN=Tra2b PE=1 SV=1                  | 13.888889 | 4  | 7  | 4  | 33.646 | 11.25 | 2700000  |          | 3800000  | 16.53  |
| Q80UW2 | F-box only protein 2 OS=Mus musculus GN=Fbxo2 PE=1 SV=1                                | 36.363636 | 7  | 19 | 7  | 33.655 | 4.28  | 7000000  | 5000000  | 11000000 | 65.92  |
| Q5HZI9 | Solute carrier family 25 member 51 OS=Mus musculus GN=Slc25a51 PE=1 SV=1               | 2.3489933 | 1  | 3  | 1  | 33.668 | 9.66  | 1800000  | 570000   | 1600000  | 6.60   |
| Q8K2H2 | OTU domain-containing protein 6B OS=Mus musculus GN=Otd6b PE=1 SV=1                    | 4.4217687 | 1  | 1  | 1  | 33.737 | 5.53  |          |          | 1200000  | 3.51   |
| Q9ERF3 | WD repeat-containing protein 61 OS=Mus musculus GN=Wdr61 PE=1 SV=1                     | 5.2459016 | 1  | 1  | 1  | 33.752 | 5.36  |          | 250000   |          | 3.04   |
| P47941 | Crk-like protein OS=Mus musculus GN=Crkl PE=1 SV=2                                     | 5.2805281 | 1  | 1  | 1  | 33.809 | 6.74  |          |          | 1600000  | 2.39   |
| P10711 | Transcription elongation factor A protein 1 OS=Mus musculus GN=Tcea1 PE=1 SV=2         | 4.3189369 | 1  | 1  | 1  | 33.859 | 8.38  | 950000   |          |          | 2.04   |
| O35295 | Transcriptional activator protein Pur-beta OS=Mus musculus GN=Purb PE=1 SV=3           | 12.037037 | 2  | 7  | 2  | 33.881 | 5.43  | 19000000 | 5000000  | 17000000 | 31.72  |
| Q8JZU2 | Tricarboxylate transport protein, mitochondrial OS=Mus musculus GN=Slc25a1 PE=1 SV=    | 3.5369775 | 1  | 3  | 1  | 33.91  | 9.89  | 120000   |          | 120000   | 6.37   |
| Q9D710 | Thioredoxin-related transmembrane protein 2 OS=Mus musculus GN=Tmx2 PE=1 SV=1          | 13.220339 | 4  | 8  | 4  | 33.921 | 8.75  | 3900000  | 1500000  | 2700000  | 18.75  |
| Q8C0M9 | Isoaspartyl peptidase/L-asparaginase OS=Mus musculus GN=Asrg1 PE=1 SV=1                | 10.736196 | 3  | 3  | 3  | 33.928 | 7.65  | 2900000  | 1600000  | 230000   | 8.60   |
| P31230 | Aminoacyl tRNA synthase complex-interacting multifunctional protein 1 OS=Mus musculus  | 3.8709677 | 1  | 3  | 1  | 33.976 | 8.35  | 4300000  | 1900000  | 3400000  | 11.01  |
| Q99L04 | Dehydrogenase/reductase SDR family member 1 OS=Mus musculus GN=Dhrs1 PE=1 SV=          | 10.543131 | 3  | 6  | 3  | 33.983 | 8.35  | 4000000  | 1400000  | 3400000  | 15.25  |
| Q62277 | Synaptophysin OS=Mus musculus GN=Syp PE=1 SV=2                                         | 12.738854 | 4  | 29 | 4  | 34.002 | 4.94  | 15000000 | 10000000 | 11000000 | 71.20  |
| Q91YL2 | E3 ubiquitin-protein ligase RNF126 OS=Mus musculus GN=Rnf126 PE=1 SV=1                 | 5.4313099 | 1  | 2  | 1  | 34.059 | 5.17  |          | 280000   | 830000   | 6.49   |
| Q99KB8 | Hydroxyacylglutathione hydrolase, mitochondrial OS=Mus musculus GN=Hagh PE=1 SV=       | 12.621359 | 3  | 7  | 3  | 34.062 | 7.75  | 2700000  | 1800000  | 4700000  | 20.70  |
| Q9DCN2 | NADH-cytochrome b5 reductase 3 OS=Mus musculus GN=Cyb5r3 PE=1 SV=3                     | 10.963455 | 3  | 9  | 3  | 34.106 | 8.38  | 10000000 | 3600000  | 8200000  | 21.83  |
| Q9DB73 | NADH-cytochrome b5 reductase 1 OS=Mus musculus GN=Cyb5r1 PE=1 SV=1                     | 6.8852459 | 2  | 4  | 2  | 34.113 | 8.87  | 2900000  | 1700000  |          | 10.14  |
| Q9CR62 | Mitochondrial 2-oxoglutarate/malate carrier protein OS=Mus musculus GN=Slc25a11 PE=    | 25.477707 | 8  | 17 | 8  | 34.133 | 9.94  | 15000000 | 6000000  | 11000000 | 37.60  |
| P70452 | Syntaxin-4 OS=Mus musculus GN=Stx4 PE=1 SV=1                                           | 4.3624161 | 1  | 1  | 1  | 34.144 | 6.14  |          |          | 550000   | 2.43   |
| Q9DB41 | Mitochondrial glutamate carrier 2 OS=Mus musculus GN=Slc25a18 PE=1 SV=4                | 17.1875   | 5  | 11 | 3  | 34.144 | 9.19  | 4300000  | 2700000  | 3100000  | 31.66  |
| P49312 | Heterogeneous nuclear ribonucleoprotein A1 OS=Mus musculus GN=Hnrnpa1 PE=1 SV=         | 31.875    | 10 | 31 | 10 | 34.175 | 9.23  | 30000000 | 7900000  | 22000000 | 102.11 |
| Q99M28 | RNA-binding protein with serine-rich domain 1 OS=Mus musculus GN=Rnps1 PE=1 SV=1       | 8.852459  | 2  | 5  | 2  | 34.188 | 11.84 | 8100000  |          | 6800000  | 14.43  |
| P14869 | 60S acidic ribosomal protein P0 OS=Mus musculus GN=Rplp0 PE=1 SV=3                     | 19.242902 | 6  | 14 | 6  | 34.195 | 6.25  | 14000000 | 4000000  | 4800000  | 36.70  |
| Q9CWU6 | Ubiquinol-cytochrome-c reductase complex assembly factor 1 OS=Mus musculus GN=Uq       | 5.7627119 | 1  | 1  | 1  | 34.277 | 8.48  |          |          | 1300000  | 2.61   |
| P35550 | rRNA 2'-O-methyltransferase fibrillar OS=Mus musculus GN=Fbl PE=1 SV=2                 | 3.3639144 | 1  | 1  | 1  | 34.286 | 10.24 | 1700000  |          |          | 2.42   |
| Q8BJU0 | Small glutamine-rich tetratricopeptide repeat-containing protein alpha OS=Mus musculus | 7.9365079 | 2  | 5  | 2  | 34.301 | 5.06  | 2500000  | 2600000  |          | 10.91  |
| Q64444 | Carbonic anhydrase 4 OS=Mus musculus GN=Ca4 PE=1 SV=1                                  | 7.8688525 | 2  | 7  | 2  | 34.33  | 8.21  | 3400000  | 1800000  | 3200000  | 19.30  |
| Q9CVB6 | Actin-related protein 2/3 complex subunit 2 OS=Mus musculus GN=Arpc2 PE=1 SV=3         | 31        | 10 | 34 | 10 | 34.336 | 7.36  | 20000000 | 14000000 | 16000000 | 87.86  |
| Q9Z204 | Heterogeneous nuclear ribonucleoproteins C1/C2 OS=Mus musculus GN=Hnrnpc PE=1 SV=      | 12.460064 | 3  | 9  | 3  | 34.364 | 5.05  | 20000000 | 3600000  | 12000000 | 28.10  |
| P47962 | 60S ribosomal protein L5 OS=Mus musculus GN=Rpl5 PE=1 SV=3                             | 13.131313 | 4  | 17 | 4  | 34.379 | 9.77  | 14000000 | 5500000  | 5800000  | 40.83  |
| Q9DBX2 | Phosducin-like protein OS=Mus musculus GN=Pdcl PE=1 SV=1                               | 3.986711  | 1  | 1  | 1  | 34.385 | 4.87  |          |          | 700000   | 2.84   |
| P55088 | Aquaporin-4 OS=Mus musculus GN=Aqp4 PE=1 SV=2                                          | 3.0959752 | 1  | 2  | 1  | 34.414 | 7.42  | 4500000  |          | 3900000  | 4.43   |
| Q8K274 | Ketosamine-3-kinase OS=Mus musculus GN=Fn3krp PE=1 SV=2                                | 6.4724919 | 1  | 2  | 1  | 34.446 | 7.87  |          | 1100000  | 2600000  | 6.58   |
| O88531 | Palmitoyl-protein thioesterase 1 OS=Mus musculus GN=Ppt1 PE=1 SV=2                     | 10.784314 | 3  | 5  | 3  | 34.467 | 8     | 5200000  | 1900000  | 810000   | 13.56  |
| O89079 | Coatomer subunit epsilon OS=Mus musculus GN=Cope PE=1 SV=3                             | 2.9220779 | 1  | 3  | 1  | 34.545 | 5.06  |          | 800000   | 870000   | 6.23   |
| O35593 | 26S proteasome non-ATPase regulatory subunit 14 OS=Mus musculus GN=Psm14 PE=           | 5.1612903 | 2  | 2  | 2  | 34.555 | 6.52  |          | 970000   |          | 3.68   |
| Q9D6M3 | Mitochondrial glutamate carrier 1 OS=Mus musculus GN=Slc25a22 PE=1 SV=1                | 21.671827 | 7  | 15 | 5  | 34.648 | 9.09  | 13000000 | 6700000  | 9100000  | 43.80  |
| Q9CWZ7 | Gamma-soluble NSF attachment protein OS=Mus musculus GN=Napg PE=1 SV=1                 | 41.025641 | 12 | 34 | 12 | 34.71  | 5.41  | 15000000 | 12000000 | 27000000 | 99.49  |
| O70503 | Very-long-chain 3-oxoacyl-CoA reductase OS=Mus musculus GN=Hsd17b12 PE=1 SV=1          | 8.0128205 | 2  | 5  | 2  | 34.719 | 9.52  | 3700000  | 1300000  | 2100000  | 15.54  |
| Q9JHQ5 | Leucine zipper transcription factor-like protein 1 OS=Mus musculus GN=Lztf1 PE=1 SV=   | 5.6856187 | 1  | 2  | 1  | 34.752 | 5.17  | 450000   |          | 530000   | 5.37   |
| Q9D7G0 | Ribose-phosphate pyrophosphokinase 1 OS=Mus musculus GN=Ppks1 PE=1 SV=4                | 15.09434  | 4  | 9  | 4  | 34.812 | 6.98  | 4100000  | 2300000  | 3000000  | 25.36  |
| Q9D8B7 | Junctional adhesion molecule C OS=Mus musculus GN=Jam3 PE=1 SV=2                       | 13.548387 | 3  | 5  | 3  | 34.816 | 7.03  | 940000   | 740000   | 1000000  | 14.44  |
| Q922Q8 | Leucine-rich repeat-containing protein 59 OS=Mus musculus GN=Lrrc59 PE=1 SV=1          | 12.703583 | 3  | 7  | 3  | 34.856 | 9.52  | 4700000  | 1600000  | 2800000  | 19.25  |
| P42669 | Transcriptional activator protein Pur-alpha OS=Mus musculus GN=Pura PE=1 SV=1          | 32.398754 | 7  | 14 | 7  | 34.862 | 6.44  | 15000000 | 3500000  | 9300000  | 51.31  |
| Q8C4Q6 | Axin interactor, dorsalization-associated protein OS=Mus musculus GN=Aida PE=1 SV=1    | 5.9016393 | 1  | 1  | 1  | 34.866 | 6.74  |          |          | 570000   | 2.78   |
| Q9WUD1 | STIP1 homology and U box-containing protein 1 OS=Mus musculus GN=Stub1 PE=1 SV=        | 8.2236842 | 2  | 3  | 2  | 34.887 | 6.01  | 2000000  |          | 1400000  | 7.25   |
| Q9CRD2 | ER membrane protein complex subunit 2 OS=Mus musculus GN=Emc2 PE=1 SV=1                | 3.3670034 | 1  | 3  | 1  | 34.912 | 6.81  | 3000000  | 1600000  | 2900000  | 8.46   |

|        |                                                                                                              |           |    |    |    |        |       |           |           |           |  |        |
|--------|--------------------------------------------------------------------------------------------------------------|-----------|----|----|----|--------|-------|-----------|-----------|-----------|--|--------|
| Q99J47 | Dehydrogenase/reductase SDR family member 7B OS=Mus musculus GN=Dhrs7b PE=1                                  | 4.6439628 | 1  | 1  | 1  | 34.964 | 9.63  |           |           |           |  | 3.02   |
| Q9JUZ4 | Ubiquitin-conjugating enzyme E2 J1 OS=Mus musculus GN=Ube2j1 PE=1 SV=2                                       | 4.7169811 | 1  | 3  | 1  | 34.968 | 6.99  | 2100000   | 810000    | 1800000   |  | 9.15   |
| Q9DCV4 | Regulator of microtubule dynamics protein 1 OS=Mus musculus GN=Rmdn1 PE=1 SV=2                               | 3.6065574 | 1  | 1  | 1  | 34.978 | 8.7   |           |           | 1100000   |  | 2.83   |
| Q99LC5 | Electron transfer flavoprotein subunit alpha, mitochondrial OS=Mus musculus GN=Etfaf PE=1 SV=1               | 18.018018 | 4  | 6  | 4  | 34.988 | 8.38  | 1500000   |           | 1900000   |  | 19.27  |
| Q9ER35 | Fructosamine-3-kinase OS=Mus musculus GN=Fn3k PE=1 SV=1                                                      | 5.8252427 | 1  | 3  | 1  | 35.01  | 8.4   | 820000    | 450000    | 1000000   |  | 12.09  |
| P68040 | Receptor of activated protein C kinase 1 OS=Mus musculus GN=Rack1 PE=1 SV=3                                  | 32.807571 | 8  | 19 | 8  | 35.055 | 7.69  | 20000000  | 11000000  | 18000000  |  | 53.95  |
| Q8K1Z0 | Ubiquinone biosynthesis protein COQ9, mitochondrial OS=Mus musculus GN=Coq9 PE=1 SV=1                        | 9.5846645 | 2  | 5  | 2  | 35.061 | 5.92  | 5100000   | 2800000   | 5900000   |  | 19.92  |
| Q9CQR6 | Serine/threonine-protein phosphatase 6 catalytic subunit OS=Mus musculus GN=Ppp6c PE=1 SV=1                  | 8.852459  | 2  | 2  | 2  | 35.136 | 5.69  |           | 690000    |           |  | 5.53   |
| Q8BP27 | Swi5-dependent recombination DNA repair protein 1 homolog OS=Mus musculus GN=Sfr1 PE=1 SV=1                  | 9.0909091 | 2  | 3  | 2  | 35.161 | 5.15  | 370000    |           | 360000    |  | 7.23   |
| P14094 | Sodium/potassium-transporting ATPase subunit beta-1 OS=Mus musculus GN=Atp1b1 PE=1 SV=1                      | 32.894737 | 11 | 90 | 11 | 35.172 | 8.65  | 410000000 | 310000000 | 370000000 |  | 251.38 |
| Q99JY8 | Phospholipid phosphatase 3 OS=Mus musculus GN=Plpp3 PE=1 SV=1                                                | 10.576923 | 3  | 8  | 3  | 35.193 | 9.07  | 12000000  | 5000000   | 8800000   |  | 22.14  |
| Q8R0Y8 | Mitochondrial coenzyme A transporter SLC25A42 OS=Mus musculus GN=Slc25a42 PE=1 SV=1                          | 2.5157233 | 1  | 1  | 1  | 35.219 | 10.05 | 1300000   |           |           |  | 2.24   |
| Q8K097 | Protein lifeguard 2 OS=Mus musculus GN=Faim2 PE=2 SV=1                                                       | 6.9400631 | 1  | 3  | 1  | 35.235 | 6.92  | 8500000   | 3000000   | 2300000   |  | 9.65   |
| P47199 | Quinone oxidoreductase OS=Mus musculus GN=Cryz PE=1 SV=1                                                     | 4.2296073 | 1  | 1  | 1  | 35.246 | 8.07  |           |           | 340000    |  | 3.83   |
| O35682 | Myeloid-associated differentiation marker OS=Mus musculus GN=Myadm PE=1 SV=2                                 | 5.3125    | 1  | 3  | 1  | 35.261 | 8.31  | 2100000   | 930000    | 1500000   |  | 12.00  |
| Q8C3W1 | Uncharacterized protein C1orf198 homolog OS=Mus musculus PE=1 SV=1                                           | 5.2795031 | 1  | 1  | 1  | 35.295 | 5.24  |           | 430000    |           |  | 2.44   |
| Q9D0M3 | Cytochrome c1, heme protein, mitochondrial OS=Mus musculus GN=Cyc1 PE=1 SV=1                                 | 25.230769 | 6  | 32 | 6  | 35.305 | 9.16  | 20000000  | 13000000  | 18000000  |  | 100.14 |
| Q9CZR8 | Elongation factor Ts, mitochondrial OS=Mus musculus GN=Tsfm PE=1 SV=1                                        | 2.7777778 | 1  | 1  | 1  | 35.312 | 7.06  |           |           | 720000    |  | 1.82   |
| Q8R010 | Aminoacyl tRNA synthase complex-interacting multifunctional protein 2 OS=Mus musculus GN=Ibf1 PE=1 SV=1      | 7.8125    | 1  | 2  | 1  | 35.355 | 7.83  |           |           | 1300000   |  | 5.02   |
| Q91V61 | Sideroflexin-3 OS=Mus musculus GN=Sfxn3 PE=1 SV=1                                                            | 31.152648 | 8  | 23 | 7  | 35.384 | 9.51  | 34000000  | 18000000  | 23000000  |  | 72.62  |
| Q9D0Q7 | 39S ribosomal protein L45, mitochondrial OS=Mus musculus GN=Mrpl45 PE=1 SV=1                                 | 3.2679739 | 1  | 3  | 1  | 35.388 | 9.23  | 1100000   | 490000    | 800000    |  | 7.09   |
| Q99L13 | 3-hydroxyisobutyrate dehydrogenase, mitochondrial OS=Mus musculus GN=Hibadh PE=1 SV=1                        | 4.7761194 | 1  | 3  | 1  | 35.417 | 8.13  | 1400000   | 1500000   | 1700000   |  | 8.65   |
| Q7TN79 | A-kinase anchor protein 7 isoform gamma OS=Mus musculus GN=Akap7 PE=1 SV=2                                   | 6.6878981 | 2  | 5  | 2  | 35.46  | 7.87  | 3600000   | 1700000   | 2300000   |  | 12.55  |
| P28352 | DNA-(apurinic or apyrimidinic site) lyase OS=Mus musculus GN=Apex1 PE=1 SV=2                                 | 4.1009464 | 1  | 1  | 1  | 35.468 | 7.91  | 1100000   |           |           |  | 2.58   |
| Q9JJV5 | Voltage-dependent calcium channel gamma-3 subunit OS=Mus musculus GN=Cacng3 PE=1 SV=1                        | 6.3492063 | 1  | 1  | 1  | 35.493 | 9.48  |           |           |           |  | 5.16   |
| Q9D1M0 | Protein SEC13 homolog OS=Mus musculus GN=Sec13 PE=1 SV=3                                                     | 8.6956522 | 2  | 6  | 2  | 35.543 | 5.38  | 1800000   | 1300000   | 2300000   |  | 19.30  |
| P62715 | Serine/threonine-protein phosphatase 2A catalytic subunit beta isoform OS=Mus musculus GN=Ppp2r2b PE=1 SV=1  | 29.449838 | 7  | 25 | 2  | 35.552 | 5.43  |           | 2100000   | 6800000   |  | 88.90  |
| Q922H9 | Zinc finger protein 330 OS=Mus musculus GN=Znf330 PE=1 SV=1                                                  | 5.3797468 | 1  | 1  | 1  | 35.584 | 6.16  | 910000    |           |           |  | 1.94   |
| P63330 | Serine/threonine-protein phosphatase 2A catalytic subunit alpha isoform OS=Mus musculus GN=Ppp2r2a PE=1 SV=1 | 26.860841 | 6  | 23 | 1  | 35.585 | 5.54  |           | 4600000   |           |  | 83.80  |
| P08249 | Malate dehydrogenase, mitochondrial OS=Mus musculus GN=Mdh2 PE=1 SV=3                                        | 47.633136 | 13 | 32 | 13 | 35.589 | 8.68  | 27000000  | 17000000  | 26000000  |  | 91.84  |
| P47802 | Metaxin-1 OS=Mus musculus GN=Mtx1 PE=1 SV=1                                                                  | 9.148265  | 2  | 5  | 2  | 35.601 | 6.18  | 1400000   | 4100000   | 3000000   |  | 14.86  |
| Q9Z1D1 | Eukaryotic translation initiation factor 3 subunit G OS=Mus musculus GN=EIF3G PE=1 SV=1                      | 8.4375    | 2  | 5  | 2  | 35.616 | 5.9   | 5800000   | 1900000   | 5000000   |  | 15.55  |
| Q99JR1 | Sideroflexin-1 OS=Mus musculus GN=Sfxn1 PE=1 SV=3                                                            | 22.670807 | 6  | 14 | 5  | 35.626 | 9.23  | 11000000  | 5400000   | 7500000   |  | 38.03  |
| P62960 | Nuclease-sensitive element-binding protein 1 OS=Mus musculus GN=Ybx1 PE=1 SV=3                               | 9.3167702 | 2  | 5  | 2  | 35.709 | 9.88  | 230000    | 210000    | 270000    |  | 16.43  |
| O70252 | Heme oxygenase 2 OS=Mus musculus GN=Hmox2 PE=1 SV=1                                                          | 12.698413 | 4  | 7  | 4  | 35.716 | 5.87  | 1000000   | 1400000   | 1600000   |  | 17.48  |
| P48036 | Annexin A5 OS=Mus musculus GN=Anxa5 PE=1 SV=1                                                                | 21.630094 | 7  | 14 | 7  | 35.73  | 4.96  | 4700000   | 3700000   | 3200000   |  | 33.99  |
| Q9CPX6 | Ubiquitin-like-conjugating enzyme ATG3 OS=Mus musculus GN=Atg3 PE=1 SV=1                                     | 4.1401274 | 1  | 1  | 1  | 35.773 | 4.72  |           |           | 310000    |  | 2.59   |
| P16858 | Glyceraldehyde-3-phosphate dehydrogenase OS=Mus musculus GN=Gapdh PE=1 SV=2                                  | 55.555556 | 16 | 63 | 16 | 35.787 | 8.25  | 58000000  | 130000000 | 130000000 |  | 194.16 |
| Q9DCJ1 | Target of rapamycin complex subunit LST8 OS=Mus musculus GN=Mlst8 PE=1 SV=1                                  | 5.5214724 | 1  | 1  | 1  | 35.828 | 5.86  |           |           | 1800000   |  | 2.73   |
| Q8R3Q0 | Store-operated calcium entry-associated regulatory factor OS=Mus musculus GN=Saraf1 PE=1 SV=1                | 4.1916168 | 1  | 2  | 1  | 35.833 | 8.19  |           | 610000    | 620000    |  | 4.82   |
| Q9CRY7 | Glycerophosphodiester phosphodiesterase domain-containing protein 1 OS=Mus musculus GN=Gpdpe1 PE=1 SV=1      | 3.8216561 | 1  | 3  | 1  | 35.844 | 8.31  | 2400000   | 790000    | 1300000   |  | 9.06   |
| P08226 | Apolipoprotein E OS=Mus musculus GN=Apoe PE=1 SV=2                                                           | 37.942122 | 10 | 22 | 10 | 35.844 | 5.68  | 8300000   | 5600000   | 8000000   |  | 60.10  |
| O88545 | COP9 signalosome complex subunit 6 OS=Mus musculus GN=Cops6 PE=1 SV=1                                        | 4.6296296 | 1  | 3  | 1  | 35.857 | 5.73  | 3200000   | 1800000   | 3100000   |  | 9.51   |
| Q6WVG3 | BTB/POZ domain-containing protein KCTD12 OS=Mus musculus GN=Kctd12 PE=1 SV=1                                 | 13.761468 | 4  | 9  | 4  | 35.87  | 5.81  | 3400000   | 1400000   | 2500000   |  | 25.61  |
| O88602 | Voltage-dependent calcium channel gamma-2 subunit OS=Mus musculus GN=Cacng2 PE=1 SV=1                        | 4.0247678 | 1  | 2  | 1  | 35.872 | 8.98  | 1600000   |           | 1600000   |  | 3.94   |
| Q99JG3 | Annexin A13 OS=Mus musculus GN=Anxa13 PE=1 SV=3                                                              | 5.0473186 | 1  | 1  | 1  | 35.899 | 5.99  |           |           |           |  | 2.64   |
| E9PUL5 | Proline-rich transmembrane protein 2 OS=Mus musculus GN=Prrt2 PE=1 SV=1                                      | 38.728324 | 6  | 22 | 6  | 35.902 | 4.63  | 43000000  | 15000000  | 34000000  |  | 88.92  |
| Q3TY60 | Protein FAM131B OS=Mus musculus GN=Fam131b PE=1 SV=1                                                         | 6.626506  | 2  | 4  | 2  | 35.935 | 4.45  | 1800000   |           | 2500000   |  | 6.98   |



|        |                                                                                             |           |    |     |    |        |      |           |          |           |        |
|--------|---------------------------------------------------------------------------------------------|-----------|----|-----|----|--------|------|-----------|----------|-----------|--------|
| Q8BJZ4 | 28S ribosomal protein S35, mitochondrial OS=Mus musculus GN=Mrps35 PE=1 SV=2                | 4.0625    | 1  | 1   | 1  | 35.953 | 8.59 |           | 430000   |           | 2.09   |
| P10518 | Delta-aminolevulinic acid dehydratase OS=Mus musculus GN=Alad PE=1 SV=1                     | 5.7575758 | 1  | 1   | 1  | 36     | 6.79 |           |          | 430000    | 4.30   |
| Q9CY27 | Very-long-chain enoyl-CoA reductase OS=Mus musculus GN=Teqr PE=1 SV=1                       | 5.8441558 | 2  | 2   | 2  | 36.067 | 9.55 | 8200000   |          |           | 4.37   |
| Q6ZWX6 | Eukaryotic translation initiation factor 2 subunit 1 OS=Mus musculus GN=Eif2s1 PE=1 SV=1    | 20.952381 | 5  | 15  | 5  | 36.085 | 5.08 | 3900000   | 1400000  | 3600000   | 50.34  |
| Q9Z0G0 | PDZ domain-containing protein GIPC1 OS=Mus musculus GN=Gipc1 PE=1 SV=1                      | 4.2042042 | 1  | 3   | 1  | 36.107 | 5.91 |           | 1100000  | 950000    | 9.14   |
| Q9WUM5 | Succinate--CoA ligase [ADP/GDP-forming] subunit alpha, mitochondrial OS=Mus musculus        | 4.6242775 | 1  | 2   | 1  | 36.132 | 9.39 |           | 5000000  | 6800000   | 7.48   |
| P70372 | ELAV-like protein 1 OS=Mus musculus GN=Elav1 PE=1 SV=2                                      | 6.4417178 | 2  | 2   | 2  | 36.146 | 9.04 |           |          | 3900000   | 5.29   |
| P35803 | Neuronal membrane glycoprotein M6-b OS=Mus musculus GN=Gpm6b PE=1 SV=2                      | 15.853659 | 5  | 24  | 5  | 36.186 | 6.14 | 38000000  | 22000000 | 37000000  | 74.73  |
| O55091 | Protein IMPACT OS=Mus musculus GN=Impact PE=1 SV=2                                          | 9.1194969 | 2  | 5   | 2  | 36.253 | 5.05 | 4600000   | 1400000  | 2800000   | 14.01  |
| Q9QZX7 | Serine racemase OS=Mus musculus GN=Srr PE=1 SV=1                                            | 4.719764  | 1  | 2   | 1  | 36.336 | 6.02 |           | 650000   | 1300000   | 6.16   |
| Q9ERI6 | Retinol dehydrogenase 14 OS=Mus musculus GN=Rdh14 PE=1 SV=1                                 | 2.3952096 | 1  | 2   | 1  | 36.343 | 8.18 | 2100000   | 640000   |           | 4.28   |
| Q9QZD9 | Eukaryotic translation initiation factor 3 subunit I OS=Mus musculus GN=Eif3i PE=1 SV=1     | 19.692308 | 6  | 15  | 6  | 36.438 | 5.64 | 3900000   | 2500000  | 4600000   | 40.14  |
| Q8CEE7 | Retinol dehydrogenase 13 OS=Mus musculus GN=Rdh13 PE=1 SV=1                                 | 3.8922156 | 1  | 2   | 1  | 36.441 | 8.85 | 490000    |          | 620000    | 5.29   |
| P06151 | L-lactate dehydrogenase A chain OS=Mus musculus GN=Ldha PE=1 SV=3                           | 23.795181 | 7  | 28  | 6  | 36.475 | 7.74 | 29000000  | 12000000 | 20000000  | 84.26  |
| P14152 | Malate dehydrogenase, cytoplasmic OS=Mus musculus GN=Mdh1 PE=1 SV=3                         | 29.94012  | 9  | 25  | 9  | 36.488 | 6.58 | 50000000  | 20000000 | 48000000  | 71.98  |
| Q9D1H7 | Golgi to ER traffic protein 4 homolog OS=Mus musculus GN=Get4 PE=1 SV=2                     | 8.2568807 | 2  | 4   | 2  | 36.502 | 5.41 | 2200000   | 810000   | 1900000   | 13.06  |
| P26516 | 26S proteasome non-ATPase regulatory subunit 7 OS=Mus musculus GN=Psmd7 PE=1 SV=1           | 3.1152648 | 1  | 3   | 1  | 36.517 | 6.77 | 4800000   | 2500000  | 3500000   | 7.27   |
| P16125 | L-lactate dehydrogenase B chain OS=Mus musculus GN=Ldhb PE=1 SV=2                           | 35.928144 | 13 | 36  | 12 | 36.549 | 6.05 | 48000000  | 23000000 | 45000000  | 108.67 |
| Q9JH6  | Alcohol dehydrogenase [NADP(+)] OS=Mus musculus GN=Akr1a1 PE=1 SV=3                         | 16.923077 | 4  | 8   | 4  | 36.564 | 7.39 | 1200000   | 1100000  | 1900000   | 22.66  |
| P61965 | WD repeat-containing protein 5 OS=Mus musculus GN=Wdr5 PE=1 SV=1                            | 4.491018  | 1  | 1   | 1  | 36.565 | 8.27 | 250000    |          |           | 2.65   |
| P58389 | Serine/threonine-protein phosphatase 2A activator OS=Mus musculus GN=Ppp2r4 PE=1 SV=1       | 4.0247678 | 1  | 3   | 1  | 36.687 | 6.39 | 3000000   | 1300000  | 2200000   | 7.88   |
| Q8HW98 | IgLON family member 5 OS=Mus musculus GN=Iglon5 PE=2 SV=2                                   | 9.2261905 | 2  | 4   | 2  | 36.744 | 7.69 | 1100000   | 1500000  | 2100000   | 10.90  |
| Q921M7 | Protein FAM49B OS=Mus musculus GN=Fam49b PE=1 SV=1                                          | 9.8765432 | 2  | 3   | 2  | 36.753 | 6.06 | 4600000   |          | 3100000   | 10.09  |
| Q05117 | Tartrate-resistant acid phosphatase type 5 OS=Mus musculus GN=Acp5 PE=1 SV=2                | 8.5626911 | 1  | 1   | 1  | 36.784 | 8.9  |           | 2900000  |           | 2.60   |
| Q8VCY8 | Phospholipid phosphatase-related protein type 2 OS=Mus musculus GN=Plppr2 PE=1 SV=1         | 5.5393586 | 1  | 1   | 1  | 36.912 | 9.5  | 5100000   |          |           | 3.06   |
| Q8R001 | Microtubule-associated protein RP/EB family member 2 OS=Mus musculus GN=Mapre2 PE=1 SV=1    | 24.846626 | 6  | 15  | 6  | 36.923 | 5.38 | 7500000   | 6200000  | 11000000  | 46.15  |
| Q9WVA3 | Mitotic checkpoint protein BUB3 OS=Mus musculus GN=Bub3 PE=1 SV=2                           | 12.269939 | 3  | 5   | 3  | 36.931 | 6.84 | 9300000   | 2300000  | 8300000   | 13.57  |
| P63087 | Serine/threonine-protein phosphatase PP1-gamma catalytic subunit OS=Mus musculus GN=PPP1C1  | 13.312693 | 4  | 8   | 2  | 36.96  | 6.54 | 3200000   | 2600000  | 4100000   | 18.89  |
| P21995 | Embigin OS=Mus musculus GN=Emb PE=1 SV=2                                                    | 3.9393939 | 1  | 1   | 1  | 37.041 | 6.02 |           |          |           | 2.83   |
| O35887 | Calumenin OS=Mus musculus GN=Calu PE=1 SV=1                                                 | 23.174603 | 6  | 16  | 6  | 37.041 | 4.67 | 4000000   | 3200000  | 4700000   | 44.24  |
| Q8BV15 | Syntaxin-16 OS=Mus musculus GN=Stx16 PE=1 SV=3                                              | 8.2822086 | 2  | 2   | 2  | 37.057 | 5.86 | 3100000   | 470000   |           | 6.04   |
| Q8C0L0 | Thioredoxin-related transmembrane protein 4 OS=Mus musculus GN=Tmx4 PE=1 SV=2               | 26.865672 | 5  | 14  | 5  | 37.108 | 4.37 | 11000000  | 3100000  | 6900000   | 46.66  |
| P62141 | Serine/threonine-protein phosphatase PP1-beta catalytic subunit OS=Mus musculus GN=PPP1R1B  | 13.149847 | 4  | 10  | 1  | 37.163 | 6.19 | 3400000   |          |           | 23.66  |
| Q8BP92 | Reticulocalbin-2 OS=Mus musculus GN=Rcn2 PE=1 SV=1                                          | 24.0625   | 6  | 15  | 6  | 37.248 | 4.42 | 3700000   | 4000000  | 6200000   | 54.72  |
| P10605 | Cathepsin B OS=Mus musculus GN=Ctsb PE=1 SV=2                                               | 13.274336 | 4  | 9   | 4  | 37.256 | 5.91 | 1900000   | 1500000  | 1900000   | 23.31  |
| P29699 | Alpha-2-HS-glycoprotein OS=Mus musculus GN=Ahsg PE=1 SV=1                                   | 4.9275362 | 1  | 2   | 1  | 37.302 | 6.51 | 980000    |          | 340000    | 5.71   |
| Q925N0 | Sideroflexin-5 OS=Mus musculus GN=Sfxn5 PE=1 SV=2                                           | 14.912281 | 4  | 9   | 4  | 37.305 | 9.44 | 7600000   | 2500000  | 4700000   | 28.81  |
| P62880 | Guanine nucleotide-binding protein G(I)/G(S)/G(T) subunit beta-2 OS=Mus musculus GN=GNAS1   | 27.352941 | 7  | 39  | 2  | 37.307 | 6    | 50000000  | 31000000 | 56000000  | 110.36 |
| Q9CX10 | 2-methoxy-6-polyprenyl-1,4-benzoquinol methylase, mitochondrial OS=Mus musculus GN=MOX1     | 3.6697248 | 1  | 3   | 1  | 37.312 | 7.49 | 1100000   | 1000000  | 1300000   | 8.01   |
| Q8BHZ0 | Protein FAM49A OS=Mus musculus GN=Fam49a PE=1 SV=1                                          | 4.3343653 | 1  | 2   | 1  | 37.319 | 6.01 | 4800000   |          | 2800000   | 6.90   |
| Q9R020 | Zinc finger Ran-binding domain-containing protein 2 OS=Mus musculus GN=Zranb2 PE=1 SV=1     | 4.2424242 | 1  | 2   | 1  | 37.328 | 9.89 | 6500000   |          | 5200000   | 7.86   |
| Q8BVA5 | Lipid droplet-associated hydrolase OS=Mus musculus GN=Ldah PE=1 SV=1                        | 3.9877301 | 1  | 1   | 1  | 37.349 | 8.28 | 1100000   |          |           | 2.76   |
| P62874 | Guanine nucleotide-binding protein G(I)/G(S)/G(T) subunit beta-1 OS=Mus musculus GN=GNAS1   | 46.470588 | 12 | 47  | 7  | 37.353 | 6    | 76000000  | 52000000 | 100000000 | 139.42 |
| P29387 | Guanine nucleotide-binding protein subunit beta-4 OS=Mus musculus GN=Gnb4 PE=1 SV=1         | 15.294118 | 4  | 21  | 2  | 37.355 | 6.16 | 3700000   | 1700000  |           | 52.72  |
| O88569 | Heterogeneous nuclear ribonucleoproteins A2/B1 OS=Mus musculus GN=Hnrnpa2b1 PE=1 SV=1       | 56.090652 | 19 | 110 | 19 | 37.38  | 8.95 | 180000000 | 80000000 | 150000000 | 336.91 |
| P60335 | Poly(rC)-binding protein 1 OS=Mus musculus GN=Pcbp1 PE=1 SV=1                               | 14.044944 | 4  | 15  | 1  | 37.474 | 7.09 | 3800000   | 1300000  | 2200000   | 44.68  |
| Q9CY73 | 39S ribosomal protein L44, mitochondrial OS=Mus musculus GN=Mrpl44 PE=1 SV=3                | 5.7057057 | 1  | 1   | 1  | 37.504 | 8.51 | 370000    |          |           | 2.54   |
| P62137 | Serine/threonine-protein phosphatase PP1-alpha catalytic subunit OS=Mus musculus GN=PPP1R1A | 15.757576 | 5  | 9   | 2  | 37.516 | 6.33 | 1400000   | 3300000  |           | 21.56  |

|        |                                                                                        |           |    |    |    |        |      |          |          |          |        |
|--------|----------------------------------------------------------------------------------------|-----------|----|----|----|--------|------|----------|----------|----------|--------|
| P06797 | Cathepsin L1 OS=Mus musculus GN=Ctsl PE=1 SV=2                                         | 4.7904192 | 1  | 2  | 1  | 37.523 | 6.83 | 480000   | 700000   |          | 6.95   |
| Q35864 | COP9 signalosome complex subunit 5 OS=Mus musculus GN=Cops5 PE=1 SV=3                  | 2.994012  | 1  | 3  | 1  | 37.525 | 6.54 | 1600000  | 1100000  | 1800000  | 7.82   |
| Q8K0S0 | Phytanoyl-CoA hydroxylase-interacting protein OS=Mus musculus GN=Phyhip PE=1 SV=10     |           | 3  | 7  | 3  | 37.53  | 7.01 | 4500000  | 1900000  | 4700000  | 18.31  |
| P13707 | Glycerol-3-phosphate dehydrogenase [NAD(+)], cytoplasmic OS=Mus musculus GN=Gpd        | 5.1575931 | 2  | 4  | 2  | 37.548 | 7.17 | 2300000  | 830000   | 1500000  | 8.38   |
| Q99N96 | 39S ribosomal protein L1, mitochondrial OS=Mus musculus GN=Mrlp1 PE=1 SV=2             | 4.7619048 | 1  | 2  | 1  | 37.573 | 8.72 |          | 540000   |          | 5.89   |
| O08915 | AH receptor-interacting protein OS=Mus musculus GN=Aip PE=1 SV=1                       | 5.7575758 | 1  | 1  | 1  | 37.581 | 6.4  |          |          | 300000   | 3.00   |
| Q9WUP7 | Ubiquitin carboxyl-terminal hydrolase isozyme L5 OS=Mus musculus GN=Uchl5 PE=1 SV      | 4.8632219 | 1  | 1  | 1  | 37.593 | 5.33 | 940000   |          |          | 2.07   |
| Q9JL56 | Glycerophosphodiester phosphodiesterase 1 OS=Mus musculus GN=Gde1 PE=1 SV=1            | 3.021148  | 1  | 1  | 1  | 37.605 | 6.9  | 2700000  |          |          | 2.48   |
| Q9QYS9 | Protein quaking OS=Mus musculus GN=Qki PE=1 SV=1                                       | 2.3460411 | 1  | 1  | 1  | 37.647 | 8.56 | 720000   |          |          | 2.16   |
| Q8K221 | Arfaptin-2 OS=Mus musculus GN=Arfp2 PE=1 SV=2                                          | 9.6774194 | 2  | 5  | 2  | 37.749 | 5.87 | 340000   | 990000   | 850000   | 18.71  |
| Q9CQM9 | Glutaredoxin-3 OS=Mus musculus GN=Glx3 PE=1 SV=1                                       | 7.1216617 | 2  | 4  | 2  | 37.754 | 5.59 | 2400000  | 1200000  | 2500000  | 9.93   |
| Q9D832 | DnaJ homolog subfamily B member 4 OS=Mus musculus GN=Dnajb4 PE=1 SV=1                  | 15.133531 | 4  | 9  | 3  | 37.758 | 8.59 | 2100000  | 1200000  | 1900000  | 26.95  |
| Q9CXD6 | Mitochondrial calcium uniporter regulator 1 OS=Mus musculus GN=Mcur1 PE=1 SV=1         | 2.3529412 | 1  | 1  | 1  | 37.826 | 10.2 |          |          | 310000   | 2.07   |
| Q62313 | Trans-Golgi network integral membrane protein 1 OS=Mus musculus GN=Tgoln1 PE=1 S       | 25.779037 | 4  | 10 | 4  | 37.826 | 5.34 | 1300000  | 710000   | 740000   | 31.11  |
| P52795 | Ephrin-B1 OS=Mus musculus GN=Efnb1 PE=1 SV=1                                           | 11.014493 | 2  | 3  | 2  | 37.835 | 9.03 | 700000   |          | 1100000  | 8.60   |
| Q9JM96 | Cdc42 effector protein 4 OS=Mus musculus GN=Cdc42ep4 PE=1 SV=1                         | 4.2979943 | 1  | 1  | 1  | 37.846 | 5.36 | 650000   |          |          | 1.92   |
| Q8BFZ9 | Erlin-2 OS=Mus musculus GN=Erlin2 PE=1 SV=1                                            | 16.470588 | 5  | 11 | 3  | 37.849 | 5.5  | 6300000  | 4800000  | 5900000  | 30.98  |
| Q9QYA2 | Mitochondrial import receptor subunit TOM40 homolog OS=Mus musculus GN=Tomm40          | 19.113573 | 4  | 7  | 4  | 37.871 | 7.74 | 2700000  | 1900000  | 2100000  | 22.64  |
| Q80Z24 | Neuronal growth regulator 1 OS=Mus musculus GN=Negr1 PE=1 SV=1                         | 29.597701 | 7  | 25 | 7  | 37.876 | 6.52 | 14000000 | 9200000  | 15000000 | 79.15  |
| Q80V91 | Probable E3 ubiquitin-protein ligase DTX3 OS=Mus musculus GN=Dtx3 PE=1 SV=2            | 6.6282421 | 1  | 1  | 1  | 37.958 | 8.73 |          |          |          | 3.99   |
| Q99PJ0 | Neurotrimin OS=Mus musculus GN=Ntm PE=1 SV=2                                           | 35.755814 | 11 | 32 | 11 | 37.96  | 7.81 | 71000000 | 61000000 | 30000000 | 104.72 |
| Q8K021 | Secretory carrier-associated membrane protein 1 OS=Mus musculus GN=Scamp1 PE=1         | 17.455621 | 5  | 20 | 5  | 38.004 | 7.71 | 12000000 | 6500000  | 12000000 | 58.28  |
| Q8BLK3 | Limbic system-associated membrane protein OS=Mus musculus GN=Lsamp PE=1 SV=1           | 38.416422 | 13 | 60 | 13 | 38.063 | 6.65 | 32000000 | 30000000 | 40000000 | 184.32 |
| Q99L45 | Eukaryotic translation initiation factor 2 subunit 2 OS=Mus musculus GN=Eif2s2 PE=1 SV | 20.543807 | 5  | 10 | 5  | 38.068 | 5.8  | 6200000  | 890000   | 3400000  | 31.58  |
| Q05186 | Reticulocalbin-1 OS=Mus musculus GN=Rcn1 PE=1 SV=1                                     |           | 4  | 1  | 2  | 38.09  | 4.84 |          | 500000   | 1000000  | 4.03   |
| Q91VM9 | Inorganic pyrophosphatase 2, mitochondrial OS=Mus musculus GN=Ppa2 PE=1 SV=1           | 13.636364 | 3  | 6  | 3  | 38.09  | 6.98 | 1600000  | 780000   | 1700000  | 18.12  |
| P40336 | Vacuolar protein sorting-associated protein 26A OS=Mus musculus GN=Vps26a PE=1 SV      | 15.29052  | 3  | 6  | 3  | 38.09  | 6.57 | 6900000  | 3800000  | 3800000  | 21.82  |
| Q8BK64 | Activator of 90 kDa heat shock protein ATPase homolog 1 OS=Mus musculus GN=Ahsa1       | 3.2544379 | 1  | 3  | 1  | 38.093 | 5.53 | 900000   | 400000   | 1800000  | 6.87   |
| Q9CX34 | Protein SGT1 homolog OS=Mus musculus GN=Sugt1 PE=1 SV=3                                | 3.2738095 | 1  | 3  | 1  | 38.135 | 5.45 | 2000000  | 1100000  | 2800000  | 7.89   |
| Q9CXR1 | Dehydrogenase/reductase SDR family member 7 OS=Mus musculus GN=Dhrs7 PE=1 SV           | 5.9171598 | 1  | 1  | 1  | 38.143 | 8.32 | 1300000  |          |          | 2.17   |
| Q9QYJ3 | DnaJ homolog subfamily B member 1 OS=Mus musculus GN=Dnajb1 PE=1 SV=3                  |           | 15 | 4  | 9  | 38.143 | 8.63 | 1900000  | 1500000  | 1300000  | 22.97  |
| Q8JZW5 | SH2 domain-containing protein 5 OS=Mus musculus GN=Sh2d5 PE=1 SV=2                     | 4.3478261 | 1  | 3  | 1  | 38.149 | 8.32 | 980000   |          | 640000   | 8.41   |
| Q922Q1 | Mitochondrial amidoxime reducing component 2 OS=Mus musculus GN=Marc2 PE=1 SV          | 13.905325 | 5  | 9  | 5  | 38.17  | 8.68 | 9200000  | 5000000  | 7200000  | 24.76  |
| Q8R2Y0 | Monoacylglycerol lipase ABHD6 OS=Mus musculus GN=Abhd6 PE=1 SV=1                       | 11.309524 | 3  | 6  | 3  | 38.18  | 8.47 | 3900000  | 1500000  | 3100000  | 21.48  |
| Q61990 | Poly(rC)-binding protein 2 OS=Mus musculus GN=Pcbp2 PE=1 SV=1                          | 13.812155 | 4  | 15 | 1  | 38.197 | 6.79 | 4100000  | 2900000  | 2500000  | 44.61  |
| Q3ULJ0 | Glycerol-3-phosphate dehydrogenase 1-like protein OS=Mus musculus GN=Gpd1l PE=1        | 3.7037037 | 1  | 2  | 1  | 38.201 | 6.77 | 5700000  |          | 3600000  | 5.85   |
| Q80XN0 | D-beta-hydroxybutyrate dehydrogenase, mitochondrial OS=Mus musculus GN=Bdh1 PE=        | 21.574344 | 6  | 17 | 6  | 38.274 | 9.01 | 9100000  | 3700000  | 7500000  | 52.81  |
| Q60668 | Heterogeneous nuclear ribonucleoprotein D0 OS=Mus musculus GN=Hnrnpd PE=1 SV=2         | 18.028169 | 5  | 12 | 4  | 38.33  | 7.81 | 41000000 | 14000000 | 24000000 | 37.16  |
| O35685 | Nuclear migration protein nudC OS=Mus musculus GN=Nudc PE=1 SV=1                       | 17.168675 | 5  | 13 | 5  | 38.334 | 5.26 | 4000000  | 2200000  | 5000000  | 35.38  |
| Q9ERR1 | Nuclear distribution protein nudE-like 1 OS=Mus musculus GN=Ndel1 PE=1 SV=2            | 3.7681159 | 1  | 2  | 1  | 38.342 | 5.24 | 1800000  |          | 2000000  | 7.05   |
| Q8K4R4 | Cytoplasmic phosphatidylinositol transfer protein 1 OS=Mus musculus GN=Pitpnc1 PE=1    | 3.6144578 | 1  | 2  | 1  | 38.359 | 6.32 | 2200000  |          | 1800000  | 5.12   |
| Q99JB2 | Stomatin-like protein 2, mitochondrial OS=Mus musculus GN=Stoml2 PE=1 SV=1             | 18.413598 | 5  | 8  | 5  | 38.361 | 8.87 | 2700000  | 2000000  | 2000000  | 25.70  |
| Q9QUN9 | Dickkopf-related protein 3 OS=Mus musculus GN=Dkk3 PE=2 SV=1                           | 2.2922636 | 1  | 3  | 1  | 38.363 | 4.54 | 1400000  | 1400000  | 1300000  | 7.45   |
| Q8CAK1 | Putative transferase CAF17 homolog, mitochondrial OS=Mus musculus GN=lba57 PE=1        | 3.6312849 | 1  | 2  | 1  | 38.375 | 9.01 | 660000   |          | 690000   | 4.76   |
| Q9Z122 | Serine-threonine kinase receptor-associated protein OS=Mus musculus GN=Strap PE=1      | 34.857143 | 7  | 14 | 7  | 38.418 | 5.12 | 4900000  | 2700000  | 4300000  | 45.36  |
| O35609 | Secretory carrier-associated membrane protein 3 OS=Mus musculus GN=Scamp3 PE=1         | 8.3094556 | 2  | 3  | 2  | 38.433 | 7.64 | 770000   | 530000   | 1400000  | 7.67   |
| Q8BTG7 | Protein NDRG4 OS=Mus musculus GN=Ndr4 PE=1 SV=1                                        | 10.795455 | 2  | 2  | 2  | 38.484 | 6.32 | 1500000  | 600000   |          | 6.51   |
| P70441 | Na(+)/H(+) exchange regulatory cofactor NHE-RF1 OS=Mus musculus GN=Slc9a3r1 PE=        | 14.929577 | 5  | 7  | 5  | 38.577 | 5.9  | 4600000  | 2600000  | 3700000  | 16.14  |

|        |                                                                                       |           |    |     |    |        |       |           |           |           |        |
|--------|---------------------------------------------------------------------------------------|-----------|----|-----|----|--------|-------|-----------|-----------|-----------|--------|
| P07356 | Annexin A2 OS=Mus musculus GN=Anxa2 PE=1 SV=2                                         | 14.159292 | 5  | 6   | 5  | 38.652 | 7.69  |           |           | 4000000   | 18.18  |
| Q9R226 | KH domain-containing, RNA-binding, signal transduction-associated protein 3 OS=Mus m  | 8.0924855 | 3  | 6   | 2  | 38.784 | 8.1   | 8500000   | 2600000   | 4600000   | 12.84  |
| O54984 | ATPase Asna1 OS=Mus musculus GN=Asna1 PE=1 SV=2                                       | 2.8735632 | 1  | 2   | 1  | 38.797 | 4.91  | 870000    |           | 860000    | 4.08   |
| Q9WU01 | KH domain-containing, RNA-binding, signal transduction-associated protein 2 OS=Mus m  | 5.730659  | 2  | 2   | 1  | 38.843 | 6.48  | 510000    |           |           | 4.23   |
| Q8BK63 | Casein kinase I isoform alpha OS=Mus musculus GN=Csnk1a1 PE=1 SV=2                    | 9.495549  | 2  | 4   | 2  | 38.89  | 9.57  | 630000    |           | 210000    | 13.37  |
| P61963 | DDB1- and CUL4-associated factor 7 OS=Mus musculus GN=Dcaf7 PE=1 SV=1                 | 2.6315789 | 1  | 1   | 1  | 38.901 | 5.52  |           | 1300000   |           | 2.54   |
| Q62421 | Endophilin-A3 OS=Mus musculus GN=Sh3gl3 PE=1 SV=1                                     | 18.443804 | 5  | 8   | 5  | 38.91  | 5.12  | 1400000   | 1400000   | 1600000   | 22.08  |
| Q91X78 | Erlin-1 OS=Mus musculus GN=Erlin1 PE=1 SV=1                                           | 8.3815029 | 3  | 5   | 1  | 38.912 | 7.21  |           | 130000    |           | 11.90  |
| Q9D051 | Pyruvate dehydrogenase E1 component subunit beta, mitochondrial OS=Mus musculus C     | 32.311978 | 10 | 52  | 10 | 38.912 | 6.87  | 87000000  | 61000000  | 89000000  | 177.96 |
| Q9DAR7 | m7GpppX diphosphatase OS=Mus musculus GN=Dcps PE=1 SV=1                               | 10.059172 | 2  | 2   | 2  | 38.964 | 6.48  | 860000    |           |           | 6.14   |
| Q3TWW8 | Serine/arginine-rich splicing factor 6 OS=Mus musculus GN=Srsf6 PE=1 SV=1             | 20.058997 | 7  | 13  | 4  | 39.002 | 11.46 | 5200000   |           | 2400000   | 34.27  |
| Q9CYN9 | Renin receptor OS=Mus musculus GN=Atp6ap2 PE=1 SV=2                                   | 6.2857143 | 2  | 4   | 2  | 39.067 | 5.54  | 4400000   | 3100000   | 6200000   | 12.05  |
| Q8C0E2 | Vacuolar protein sorting-associated protein 26B OS=Mus musculus GN=Vps26b PE=1 SV     | 17.559524 | 5  | 17  | 5  | 39.1   | 7.37  | 10000000  | 7800000   | 8500000   | 51.13  |
| Q91WA3 | Histone deacetylase 11 OS=Mus musculus GN=Hdac11 PE=1 SV=1                            | 3.7463977 | 1  | 1   | 1  | 39.132 | 7.14  |           |           | 1000000   | 2.94   |
| P05064 | Fructose-bisphosphate aldolase A OS=Mus musculus GN=Aldoa PE=1 SV=2                   | 52.747253 | 17 | 70  | 15 | 39.331 | 8.09  | 130000000 | 76000000  | 110000000 | 227.74 |
| Q8BGU5 | Cyclin-Y OS=Mus musculus GN=Ccny PE=1 SV=1                                            | 3.5190616 | 1  | 1   | 1  | 39.37  | 7.2   | 2900000   |           |           | 2.66   |
| P05063 | Fructose-bisphosphate aldolase C OS=Mus musculus GN=Aldoc PE=1 SV=4                   | 52.61708  | 15 | 42  | 13 | 39.37  | 7.12  | 36000000  | 16000000  | 32000000  | 132.80 |
| Q9Z0P5 | Twinfilin-2 OS=Mus musculus GN=Twf2 PE=1 SV=1                                         | 18.624642 | 4  | 8   | 4  | 39.446 | 6.8   | 1800000   | 2000000   | 2300000   | 27.81  |
| Q9JKK7 | Tropomodulin-2 OS=Mus musculus GN=Tmod2 PE=1 SV=2                                     | 10.25641  | 3  | 6   | 3  | 39.487 | 5.35  | 4500000   | 3000000   | 2500000   | 17.31  |
| Q60900 | ELAV-like protein 3 OS=Mus musculus GN=Elavl3 PE=1 SV=1                               | 5.7220708 | 1  | 2   | 1  | 39.508 | 9.28  | 1200000   | 780000    |           | 5.68   |
| P28474 | Alcohol dehydrogenase class-3 OS=Mus musculus GN=Adh5 PE=1 SV=3                       | 4.0106952 | 1  | 2   | 1  | 39.522 | 7.25  | 1400000   |           | 2100000   | 5.22   |
| Q8BTV1 | Tumor suppressor candidate 3 OS=Mus musculus GN=Tusc3 PE=1 SV=1                       | 4.0345821 | 1  | 1   | 1  | 39.523 | 10.11 |           |           |           | 2.65   |
| Q60899 | ELAV-like protein 2 OS=Mus musculus GN=Elavl2 PE=2 SV=1                               | 12.222222 | 4  | 8   | 4  | 39.552 | 9.13  | 4100000   | 1600000   | 3400000   | 22.22  |
| Q62086 | Serum paraoxonase/arylesterase 2 OS=Mus musculus GN=Pon2 PE=1 SV=2                    | 5.0847458 | 1  | 1   | 1  | 39.592 | 5.83  |           |           | 1100000   | 2.99   |
| Q8VEM8 | Phosphate carrier protein, mitochondrial OS=Mus musculus GN=Slc25a3 PE=1 SV=1         | 16.806723 | 6  | 20  | 6  | 39.606 | 9.26  | 130000000 | 50000000  | 78000000  | 52.17  |
| Q9D6R2 | Isocitrate dehydrogenase [NAD] subunit alpha, mitochondrial OS=Mus musculus GN=Idh3   | 29.234973 | 11 | 33  | 11 | 39.613 | 6.73  | 26000000  | 18000000  | 17000000  | 96.76  |
| Q8BG05 | Heterogeneous nuclear ribonucleoprotein A3 OS=Mus musculus GN=Hnrnpa3 PE=1 SV         | 32.453826 | 12 | 48  | 12 | 39.628 | 9.01  | 100000000 | 23000000  | 64000000  | 150.06 |
| Q3UMR5 | Calcium uniporter protein, mitochondrial OS=Mus musculus GN=Mcu PE=1 SV=2             | 10        | 3  | 7   | 3  | 39.657 | 8.56  | 3600000   | 2300000   | 3600000   | 19.77  |
| Q9ZQZ8 | Core histone macro-H2A.1 OS=Mus musculus GN=H2afy PE=1 SV=3                           | 25.268817 | 8  | 24  | 6  | 39.71  | 9.8   | 17000000  | 2200000   | 5500000   | 74.55  |
| Q9D880 | Mitochondrial import inner membrane translocase subunit TIM50 OS=Mus musculus GN      | 15.580737 | 4  | 6   | 4  | 39.752 | 8.13  | 4100000   | 2700000   | 4200000   | 17.14  |
| O54946 | DnaJ homolog subfamily B member 6 OS=Mus musculus GN=Dnajb6 PE=1 SV=4                 | 6.3013699 | 2  | 6   | 1  | 39.783 | 9.36  | 16000000  | 11000000  | 14000000  | 20.07  |
| Q91WK2 | Eukaryotic translation initiation factor 3 subunit H OS=Mus musculus GN=Elf3h PE=1 SV | 5.3977273 | 1  | 5   | 1  | 39.807 | 6.67  | 1800000   | 1700000   | 3500000   | 22.62  |
| Q8R4E6 | Purine-rich element-binding protein gamma OS=Mus musculus GN=Purg PE=1 SV=1           | 9.7142857 | 2  | 4   | 2  | 39.913 | 9.51  | 2900000   | 210000    | 1700000   | 11.12  |
| P97792 | Coxsackievirus and adenovirus receptor homolog OS=Mus musculus GN=Cxadr PE=1 SV       | 7.3972603 | 2  | 3   | 2  | 39.922 | 6.96  | 1600000   | 710000    | 1100000   | 7.38   |
| Q62420 | Endophilin-A1 OS=Mus musculus GN=Sh3gl2 PE=1 SV=2                                     | 36.647727 | 11 | 51  | 7  | 39.93  | 5.39  | 48000000  | 27000000  | 53000000  | 155.94 |
| Q9Z1S5 | Neuronal-specific septin-3 OS=Mus musculus GN=Sept3 PE=1 SV=2                         | 35.428571 | 12 | 32  | 12 | 40.013 | 6.81  | 17000000  | 12000000  | 21000000  | 92.59  |
| Q91YR1 | Twinfilin-1 OS=Mus musculus GN=Twf1 PE=1 SV=2                                         | 18.285714 | 5  | 10  | 5  | 40.054 | 6.67  | 1600000   | 1600000   | 4600000   | 32.60  |
| P18872 | Guanine nucleotide-binding protein G(o) subunit alpha OS=Mus musculus GN=Gnao1 PE     | 46.327684 | 15 | 115 | 13 | 40.059 | 5.53  | 350000000 | 140000000 | 410000000 | 322.67 |
| Q8CCK0 | Core histone macro-H2A.2 OS=Mus musculus GN=H2afy2 PE=1 SV=3                          | 14.784946 | 4  | 9   | 2  | 40.067 | 9.69  | 6300000   | 350000    | 3600000   | 25.46  |
| P55264 | Adenosine kinase OS=Mus musculus GN=Adk PE=1 SV=2                                     | 2.2160665 | 1  | 2   | 1  | 40.123 | 6.21  | 1800000   |           | 840000    | 4.50   |
| P51863 | V-type proton ATPase subunit d 1 OS=Mus musculus GN=Atp6v0d1 PE=1 SV=2                | 20.512821 | 6  | 20  | 6  | 40.275 | 5     | 51000000  | 42000000  | 58000000  | 51.58  |
| B2RSH2 | Guanine nucleotide-binding protein G(i) subunit alpha-1 OS=Mus musculus GN=Gnai1 PE   | 32.768362 | 10 | 41  | 5  | 40.335 | 5.97  | 17000000  | 9300000   | 26000000  | 122.62 |
| Q9D8N2 | Protein FAM45A OS=Mus musculus GN=Fam45a PE=1 SV=2                                    | 9.2436975 | 2  | 3   | 2  | 40.395 | 6.47  | 1900000   | 1600000   |           | 10.05  |
| P49813 | Tropomodulin-1 OS=Mus musculus GN=Tmod1 PE=1 SV=2                                     | 4.178273  | 1  | 3   | 1  | 40.441 | 5.1   | 2100000   | 1300000   | 2000000   | 11.39  |
| Q99K85 | Phosphoserine aminotransferase OS=Mus musculus GN=Psat1 PE=1 SV=1                     | 9.4594595 | 3  | 5   | 3  | 40.447 | 8.03  | 1200000   | 1700000   | 2100000   | 13.18  |
| Q9QUP5 | Hyaluronan and proteoglycan link protein 1 OS=Mus musculus GN=Hapln1 PE=1 SV=1        | 30.898876 | 10 | 26  | 10 | 40.452 | 7.8   | 13000000  | 8800000   | 21000000  | 68.13  |
| P08752 | Guanine nucleotide-binding protein G(i) subunit alpha-2 OS=Mus musculus GN=Gnai2 PE   | 36.056338 | 11 | 44  | 6  | 40.463 | 5.45  | 18000000  | 9000000   | 17000000  | 137.58 |
| Q8VHL1 | Histone-lysine N-methyltransferase SETD7 OS=Mus musculus GN=Setd7 PE=1 SV=2           | 9.2896175 | 2  | 3   | 2  | 40.481 | 4.65  | 500000    |           | 2000000   | 6.94   |

|        |                                                                                           |           |    |     |    |        |       |          |          |          |        |
|--------|-------------------------------------------------------------------------------------------|-----------|----|-----|----|--------|-------|----------|----------|----------|--------|
| Q9DC51 | Guanine nucleotide-binding protein G(k) subunit alpha OS=Mus musculus GN=Gnai3 PE=        | 15.536723 | 5  | 20  | 1  | 40.512 | 5.69  | 1300000  |          | 1100000  | 52.84  |
| Q99KV1 | DnaJ homolog subfamily B member 11 OS=Mus musculus GN=Dnajb11 PE=1 SV=1                   | 22.067039 | 5  | 16  | 5  | 40.53  | 6.32  | 4400000  | 3600000  | 3400000  | 46.22  |
| Q9QWW1 | Homer protein homolog 2 OS=Mus musculus GN=Homer2 PE=1 SV=1                               | 5.9322034 | 2  | 6   | 1  | 40.545 | 6.01  | 830000   | 570000   | 250000   | 16.84  |
| P05132 | cAMP-dependent protein kinase catalytic subunit alpha OS=Mus musculus GN=Prkaca PE=       | 17.378917 | 6  | 11  | 1  | 40.545 | 8.79  | 2300000  | 890000   | 1100000  | 31.36  |
| Q99LC3 | NADH dehydrogenase [ubiquinone] 1 alpha subcomplex subunit 10, mitochondrial OS=M         | 27.323944 | 10 | 30  | 10 | 40.578 | 7.78  | 29000000 | 25000000 | 41000000 | 79.89  |
| Q8BIF2 | RNA binding protein fox-1 homolog 3 OS=Mus musculus GN=Rbfox3 PE=1 SV=2                   | 2.4064171 | 1  | 2   | 1  | 40.585 | 7.9   | 1700000  |          | 2100000  | 4.99   |
| Q9D4C9 | Clavesin-1 OS=Mus musculus GN=Clvs1 PE=1 SV=1                                             | 3.6723164 | 1  | 1   | 1  | 40.588 | 6.73  | 1100000  |          |          | 2.19   |
| O35226 | 26S proteasome non-ATPase regulatory subunit 4 OS=Mus musculus GN=Psmcd4 PE=1 S           | 10.37234  | 2  | 5   | 2  | 40.678 | 4.79  | 6100000  | 2500000  | 7000000  | 16.55  |
| P68181 | cAMP-dependent protein kinase catalytic subunit beta OS=Mus musculus GN=Prkacb PE=        | 22.222222 | 7  | 11  | 2  | 40.682 | 8.56  |          | 1500000  | 2000000  | 26.20  |
| Q9CZ44 | NSFL1 cofactor p47 OS=Mus musculus GN=Nsf1c PE=1 SV=1                                     | 39.189189 | 10 | 26  | 10 | 40.685 | 5.15  | 4900000  | 3600000  | 6700000  | 81.37  |
| Q9CR16 | Peptidyl-prolyl cis-trans isomerase D OS=Mus musculus GN=Ppid PE=1 SV=3                   | 18.918919 | 6  | 13  | 6  | 40.717 | 7.43  | 4500000  | 2200000  | 2500000  | 34.40  |
| Q9D5T0 | ATPase family AAA domain-containing protein 1 OS=Mus musculus GN=Atad1 PE=1 SV=           | 12.742382 | 2  | 4   | 2  | 40.718 | 6.9   |          | 600000   | 2300000  | 10.94  |
| Q9QYG0 | Protein NDRG2 OS=Mus musculus GN=Ndrdg2 PE=1 SV=1                                         | 16.442049 | 4  | 25  | 4  | 40.763 | 5.4   | 9800000  | 9000000  | 17000000 | 97.67  |
| O88507 | Ciliary neurotrophic factor receptor subunit alpha OS=Mus musculus GN=Cntfr PE=1 SV=      | 3.4946237 | 1  | 1   | 1  | 40.776 | 6.83  |          | 460000   |          | 0.00   |
| O70443 | Guanine nucleotide-binding protein G(z) subunit alpha OS=Mus musculus GN=Gnaz PE=         | 20.28169  | 6  | 14  | 6  | 40.824 | 7.61  | 8500000  | 2000000  | 6300000  | 39.02  |
| Q8R1N4 | NudC domain-containing protein 3 OS=Mus musculus GN=Nudcd3 PE=1 SV=3                      | 4.1322314 | 1  | 1   | 1  | 40.865 | 5.26  |          | 730000   |          | 2.56   |
| Q8BG18 | N-terminal EF-hand calcium-binding protein 1 OS=Mus musculus GN=Necab1 PE=1 SV=           | 9.9431818 | 2  | 10  | 2  | 40.908 | 4.89  | 2100000  | 1000000  | 1900000  | 30.28  |
| Q64314 | Hematopoietic progenitor cell antigen CD34 OS=Mus musculus GN=Cd34 PE=1 SV=1              | 7.8534031 | 3  | 7   | 3  | 40.957 | 5.3   | 7500000  | 4300000  | 5900000  | 17.06  |
| P62482 | Voltage-gated potassium channel subunit beta-2 OS=Mus musculus GN=Kcnab2 PE=1 S           | 10.899183 | 4  | 6   | 4  | 40.995 | 9     | 5400000  | 1900000  | 2700000  | 15.00  |
| Q8VEK0 | Cell cycle control protein 50A OS=Mus musculus GN=Tmem30a PE=1 SV=1                       | 16.483516 | 5  | 15  | 5  | 41.035 | 8.37  | 10000000 | 7300000  | 8400000  | 56.71  |
| Q9CXW2 | 28S ribosomal protein S22, mitochondrial OS=Mus musculus GN=Mmps22 PE=1 SV=1              | 9.1922006 | 3  | 5   | 3  | 41.167 | 8.56  | 990000   | 490000   | 1300000  | 15.07  |
| Q9J119 | Acidic fibroblast growth factor intracellular-binding protein OS=Mus musculus GN=Fibp PE= | 2.5210084 | 1  | 2   | 1  | 41.178 | 6.76  | 1000000  | 450000   |          | 3.92   |
| Q9R0A0 | Peroxisomal membrane protein PEX14 OS=Mus musculus GN=Pex14 PE=1 SV=1                     | 3.1914894 | 1  | 2   | 1  | 41.183 | 5.11  | 2400000  |          | 1800000  | 5.51   |
| O54833 | Casein kinase II subunit alpha' OS=Mus musculus GN=Csnk2a2 PE=1 SV=1                      | 5.7142857 | 1  | 2   | 1  | 41.189 | 8.56  | 1400000  |          | 1100000  | 6.64   |
| P63085 | Mitogen-activated protein kinase 1 OS=Mus musculus GN=Mapk1 PE=1 SV=3                     | 25.418994 | 7  | 18  | 5  | 41.249 | 6.98  | 14000000 | 7400000  | 11000000 | 52.71  |
| Q3UM45 | Protein phosphatase 1 regulatory subunit 7 OS=Mus musculus GN=Ppp1r7 PE=1 SV=2            | 13.296399 | 3  | 4   | 3  | 41.266 | 4.92  | 1900000  |          | 1000000  | 11.36  |
| O88741 | Ganglioside-induced differentiation-associated protein 1 OS=Mus musculus GN=Gdap1 P       | 12.569832 | 4  | 6   | 4  | 41.285 | 8.37  | 11000000 | 7100000  | 14000000 | 21.65  |
| Q8C163 | Nuclease EXOG, mitochondrial OS=Mus musculus GN=Exog PE=1 SV=1                            | 17.391304 | 4  | 10  | 4  | 41.358 | 8.12  | 3900000  | 2700000  | 2600000  | 30.90  |
| Q9Z2Y3 | Homer protein homolog 1 OS=Mus musculus GN=Homer1 PE=1 SV=2                               | 42.349727 | 15 | 36  | 14 | 41.388 | 5.53  | 12000000 | 5200000  | 16000000 | 100.56 |
| Q62419 | Endophilin-A2 OS=Mus musculus GN=Sh3gl1 PE=1 SV=1                                         | 25.543478 | 8  | 22  | 4  | 41.492 | 5.72  | 3500000  | 830000   | 2700000  | 65.90  |
| P42208 | Septin-2 OS=Mus musculus GN=Sept2 PE=1 SV=2                                               | 24.65374  | 6  | 11  | 6  | 41.499 | 6.55  | 2300000  | 1500000  | 1800000  | 31.24  |
| Q9QYF9 | Protein NDRG3 OS=Mus musculus GN=Ndrdg3 PE=1 SV=1                                         | 16.533333 | 4  | 12  | 4  | 41.529 | 5.25  | 2400000  | 1200000  | 1800000  | 36.39  |
| Q791T5 | Mitochondrial carrier homolog 1 OS=Mus musculus GN=Mtch1 PE=1 SV=1                        | 6.1696658 | 2  | 2   | 2  | 41.538 | 9.32  | 1400000  |          | 840000   | 4.59   |
| Q9Z0P4 | Paralemmin-1 OS=Mus musculus GN=Palm PE=1 SV=1                                            | 42.29765  | 12 | 56  | 12 | 41.589 | 4.84  | 46000000 | 22000000 | 46000000 | 193.33 |
| Q9R0Q6 | Actin-related protein 2/3 complex subunit 1A OS=Mus musculus GN=Arpc1a PE=1 SV=1          | 22.702703 | 7  | 9   | 7  | 41.6   | 8.18  | 5200000  | 4600000  | 6500000  | 26.64  |
| Q99L47 | Hsc70-interacting protein OS=Mus musculus GN=St13 PE=1 SV=1                               | 18.867925 | 6  | 17  | 6  | 41.629 | 5.26  | 15000000 | 7100000  | 12000000 | 52.45  |
| Q924L1 | LETM1 domain-containing protein 1 OS=Mus musculus GN=Letmd1 PE=1 SV=1                     | 2.7777778 | 1  | 2   | 1  | 41.674 | 10.54 | 750000   |          | 610000   | 4.26   |
| Q3UXZ6 | Protein FAM81A OS=Mus musculus GN=Fam81a PE=1 SV=2                                        | 12.362637 | 4  | 7   | 4  | 41.684 | 8.75  | 2000000  | 940000   | 1700000  | 18.09  |
| P60710 | Actin, cytoplasmic 1 OS=Mus musculus GN=Actb PE=1 SV=1                                    | 71.466667 | 25 | 260 | 12 | 41.71  | 5.48  | 60000000 | 80000000 | 1.4E+09  | 766.25 |
| Q80UY2 | E3 ubiquitin-protein ligase KCMF1 OS=Mus musculus GN=Kcmf1 PE=1 SV=1                      | 2.8871391 | 1  | 1   | 1  | 41.765 | 5.76  |          |          | 150000   | 2.02   |
| P97441 | Zinc transporter 3 OS=Mus musculus GN=Slc30a3 PE=1 SV=1                                   | 14.690722 | 5  | 11  | 5  | 41.797 | 6.38  | 16000000 | 5800000  | 9200000  | 30.00  |
| Q8BWT1 | 3-ketoacyl-CoA thiolase, mitochondrial OS=Mus musculus GN=Acaa2 PE=1 SV=3                 | 15.11335  | 4  | 12  | 4  | 41.803 | 8.09  | 4500000  | 1600000  | 2700000  | 36.65  |
| Q91VA6 | Polymerase delta-interacting protein 2 OS=Mus musculus GN=Poldip2 PE=1 SV=1               | 3.2608696 | 1  | 2   | 1  | 41.844 | 8.63  |          | 440000   | 750000   | 5.02   |
| Q811Q9 | Choline-phosphate cytidylyltransferase B OS=Mus musculus GN=Pcyt1b PE=1 SV=2              | 3.2520325 | 1  | 2   | 1  | 41.874 | 6.4   | 1200000  |          | 760000   | 4.91   |
| Q9QY14 | DnaJ homolog subfamily B member 12 OS=Mus musculus GN=Dnajb12 PE=1 SV=2                   | 7.712766  | 2  | 3   | 2  | 41.962 | 8.51  | 870000   | 880000   | 490000   | 7.76   |
| P68033 | Actin, alpha cardiac muscle 1 OS=Mus musculus GN=Actc1 PE=1 SV=1                          | 40.318302 | 16 | 194 | 3  | 41.992 | 5.39  | 35000000 | 15000000 | 40000000 | 510.64 |
| P21278 | Guanine nucleotide-binding protein subunit alpha-11 OS=Mus musculus GN=Gna11 PE=          | 16.713092 | 5  | 14  | 2  | 41.997 | 5.97  | 4500000  | 2600000  | 7100000  | 34.97  |
| Q9JKV1 | Proteasomal ubiquitin receptor ADRM1 OS=Mus musculus GN=Adrm1 PE=1 SV=2                   | 3.9312039 | 1  | 4   | 1  | 42.034 | 5.07  | 2900000  | 1900000  | 2300000  | 11.76  |

|        |                                                                                                                                      |           |    |    |    |        |       |           |          |           |        |
|--------|--------------------------------------------------------------------------------------------------------------------------------------|-----------|----|----|----|--------|-------|-----------|----------|-----------|--------|
| Q8BR92 | Paralemmin-2 OS=Mus musculus GN=Palm2 PE=1 SV=1                                                                                      | 6.9148936 | 2  | 4  | 2  | 42.069 | 5.15  | 8100000   | 3000000  | 4300000   | 11.50  |
| Q35188 | Fractalkine OS=Mus musculus GN=Cx3cl1 PE=1 SV=3                                                                                      | 4.556962  | 1  | 1  | 1  | 42.072 | 5.54  |           |          |           | 3.92   |
| Q9DCE5 | p21-activated protein kinase-interacting protein 1 OS=Mus musculus GN=Pak1ip1 PE=1 SV=1                                              | 4.4502618 | 1  | 1  | 1  | 42.089 | 8.47  |           |          |           | 2.49   |
| P15105 | Glutamine synthetase OS=Mus musculus GN=Glul PE=1 SV=6                                                                               | 41.286863 | 14 | 55 | 14 | 42.092 | 7.08  | 62000000  | 40000000 | 54000000  | 177.06 |
| P21279 | Guanine nucleotide-binding protein G(q) subunit alpha OS=Mus musculus GN=Gnaq PE=1 SV=1                                              | 34.818942 | 10 | 33 | 7  | 42.131 | 5.68  | 17000000  | 11000000 | 17000000  | 90.01  |
| Q8BHE3 | Caytaxin OS=Mus musculus GN=Atcay PE=1 SV=1                                                                                          | 21.505376 | 5  | 11 | 5  | 42.152 | 4.68  | 5500000   | 1700000  | 3900000   | 26.15  |
| P55302 | Alpha-2-macroglobulin receptor-associated protein OS=Mus musculus GN=Lrpap1 PE=1 SV=1                                                | 14.166667 | 3  | 5  | 3  | 42.189 | 7.87  | 2300000   | 1900000  | 3300000   | 15.99  |
| Q8BVQ5 | Protein phosphatase methylesterase 1 OS=Mus musculus GN=Ppme1 PE=1 SV=5                                                              | 11.917098 | 3  | 10 | 3  | 42.229 | 5.97  | 1900000   | 770000   | 2100000   | 31.74  |
| Q8R5C5 | Beta-centractin OS=Mus musculus GN=Actr1b PE=1 SV=1                                                                                  | 20.744681 | 6  | 10 | 2  | 42.255 | 6.4   | 19000000  | 5200000  | 10000000  | 31.76  |
| Q9WV02 | RNA-binding motif protein, X chromosome OS=Mus musculus GN=Rbmx PE=1 SV=1                                                            | 13.043478 | 4  | 8  | 4  | 42.275 | 10.05 | 11000000  | 3100000  | 7100000   | 24.03  |
| Q8CGC4 | Protein LSM14 homolog B OS=Mus musculus GN=Lsm14b PE=1 SV=3                                                                          | 2.8571429 | 1  | 1  | 1  | 42.284 | 9.63  | 1600000   |          |           | 2.42   |
| Q8VE33 | Ganglioside-induced differentiation-associated protein 1-like 1 OS=Mus musculus GN=Gc1i1 PE=1 SV=1                                   | 7.2972973 | 2  | 4  | 2  | 42.291 | 6.6   | 7800000   | 5700000  | 9400000   | 14.56  |
| Q8BGT8 | Phytanoyl-CoA hydroxylase-interacting protein-like OS=Mus musculus GN=Phyipl PE=1 SV=1                                               | 5.0666667 | 1  | 1  | 1  | 42.314 | 6.35  |           |          | 780000    | 2.93   |
| P49443 | Protein phosphatase 1A OS=Mus musculus GN=Ppm1a PE=1 SV=1                                                                            | 15.445026 | 5  | 13 | 5  | 42.406 | 5.36  | 3700000   | 3400000  | 4600000   | 33.42  |
| Q9JIF0 | Protein arginine N-methyltransferase 1 OS=Mus musculus GN=Prmt1 PE=1 SV=1                                                            | 10.781671 | 4  | 11 | 2  | 42.408 | 5.43  | 3300000   | 1500000  | 4900000   | 29.25  |
| P62069 | Ubiquitin carboxyl-terminal hydrolase 46 OS=Mus musculus GN=Usp46 PE=1 SV=1                                                          | 3.5519126 | 1  | 1  | 1  | 42.415 | 6.83  |           |          |           | 1.84   |
| P18572 | Basigin OS=Mus musculus GN=Bsg PE=1 SV=2                                                                                             | 18.766067 | 7  | 23 | 7  | 42.418 | 5.85  | 30000000  | 35000000 | 48000000  | 73.73  |
| Q9DC69 | NADH dehydrogenase [ubiquinone] 1 alpha subcomplex subunit 9, mitochondrial OS=Mus musculus GN=Nd1b PE=1 SV=1                        | 15.915119 | 4  | 11 | 4  | 42.498 | 9.74  | 10000000  | 5500000  | 8800000   | 35.70  |
| Q91V12 | Cytosolic acyl coenzyme A thioester hydrolase OS=Mus musculus GN=Aco7 PE=1 SV=2                                                      | 3.1496063 | 1  | 2  | 1  | 42.51  | 8.68  |           | 890000   |           | 5.39   |
| Q99MQ4 | Asporin OS=Mus musculus GN=Aspn PE=1 SV=1                                                                                            | 2.6809651 | 1  | 1  | 1  | 42.545 | 8.57  |           | 1000000  |           | 2.59   |
| P61164 | Alpha-centractin OS=Mus musculus GN=Actr1a PE=1 SV=1                                                                                 | 14.62766  | 5  | 8  | 1  | 42.587 | 6.64  | 2500000   | 1600000  | 2400000   | 21.44  |
| Q8BHS6 | Armadillo repeat-containing X-linked protein 3 OS=Mus musculus GN=Armxc3 PE=1 SV=1                                                   | 4.4854881 | 1  | 2  | 1  | 42.593 | 8.68  | 820000    |          |           | 6.25   |
| Q78ZA7 | Nucleosome assembly protein 1-like 4 OS=Mus musculus GN=Nap114 PE=1 SV=1                                                             | 12.533333 | 3  | 5  | 2  | 42.653 | 4.67  | 2500000   | 2300000  | 2600000   | 18.16  |
| Q04447 | Creatine kinase B-type OS=Mus musculus GN=Ckb PE=1 SV=1                                                                              | 44.88189  | 14 | 74 | 14 | 42.686 | 5.67  | 130000000 | 53000000 | 120000000 | 263.58 |
| Q8R464 | Cell adhesion molecule 4 OS=Mus musculus GN=Cadm4 PE=1 SV=1                                                                          | 18.298969 | 4  | 14 | 4  | 42.697 | 6.3   | 5100000   | 4200000  | 6200000   | 58.65  |
| Q9Z2Q6 | Septin-5 OS=Mus musculus GN=Sept5 PE=1 SV=2                                                                                          | 43.631436 | 15 | 53 | 14 | 42.721 | 6.67  | 43000000  | 19000000 | 41000000  | 164.61 |
| Q99J95 | Cyclin-dependent kinase 9 OS=Mus musculus GN=Cdk9 PE=1 SV=1                                                                          | 5.9139785 | 2  | 2  | 2  | 42.734 | 8.79  | 610000    |          |           | 4.40   |
| P70404 | Isocitrate dehydrogenase [NAD] subunit gamma 1, mitochondrial OS=Mus musculus GN=Idh3g PE=1 SV=1                                     | 23.664122 | 5  | 14 | 5  | 42.758 | 9.01  | 16000000  | 5200000  | 17000000  | 47.77  |
| Q80WM4 | Hyaluronan and proteoglycan link protein 4 OS=Mus musculus GN=Hapln4 PE=2 SV=2                                                       | 4         | 1  | 3  | 1  | 42.782 | 8.85  | 910000    | 410000   | 490000    | 9.92   |
| Q9WVJ2 | 26S proteasome non-ATPase regulatory subunit 13 OS=Mus musculus GN=Psm13 PE=1 SV=1                                                   | 8.2446809 | 3  | 7  | 3  | 42.782 | 5.71  | 2800000   | 2400000  | 3700000   | 16.62  |
| Q99M51 | Cytoplasmic protein NCK1 OS=Mus musculus GN=Nck1 PE=1 SV=1                                                                           | 6.8965517 | 2  | 2  | 2  | 42.863 | 6.47  | 2000000   |          | 2900000   | 4.77   |
| Q8BW96 | Calcium/calmodulin-dependent protein kinase type 1D OS=Mus musculus GN=Camk1d PE=1 SV=1                                              | 4.6753247 | 1  | 2  | 1  | 42.892 | 7.17  | 2400000   |          | 3100000   | 5.88   |
| Q99N28 | Cell adhesion molecule 3 OS=Mus musculus GN=Cadm3 PE=1 SV=1                                                                          | 26.262626 | 7  | 28 | 7  | 42.938 | 5.8   | 28000000  | 21000000 | 34000000  | 108.14 |
| P23242 | Gap junction alpha-1 protein OS=Mus musculus GN=Gja1 PE=1 SV=2                                                                       | 14.921466 | 3  | 12 | 3  | 42.977 | 8.76  | 7200000   | 980000   | 6500000   | 38.91  |
| Q62433 | Protein NDRG1 OS=Mus musculus GN=Ndr1 PE=1 SV=1                                                                                      | 3.5532995 | 1  | 1  | 1  | 42.981 | 6.1   | 1400000   |          |           | 2.75   |
| P07310 | Creatine kinase M-type OS=Mus musculus GN=Ckm PE=1 SV=1                                                                              | 2.6246719 | 1  | 1  | 1  | 43.018 | 7.06  | 1200000   |          |           | 2.15   |
| Q9CXY6 | Interleukin enhancer-binding factor 2 OS=Mus musculus GN=Ilf2 PE=1 SV=1                                                              | 11.025641 | 3  | 8  | 3  | 43.035 | 5.26  | 1900000   | 1400000  | 1500000   | 22.74  |
| Q63844 | Mitogen-activated protein kinase 3 OS=Mus musculus GN=Mapk3 PE=1 SV=5                                                                | 12.631579 | 5  | 9  | 3  | 43.039 | 6.61  | 1500000   | 980000   | 1200000   | 23.22  |
| Q62465 | Synaptic vesicle membrane protein VAT-1 homolog OS=Mus musculus GN=Vat1 PE=1 SV=1                                                    | 9.8522167 | 3  | 5  | 3  | 43.069 | 6.37  | 1700000   | 1000000  |           | 12.75  |
| Q8K0G5 | Protein TSSC1 OS=Mus musculus GN=Eipr1 PE=1 SV=2                                                                                     | 4.9222798 | 1  | 1  | 1  | 43.1   | 5.14  |           |          | 3700000   | 5.12   |
| Q9R0N5 | Synaptotagmin-5 OS=Mus musculus GN=Syt5 PE=1 SV=1                                                                                    | 8.2901554 | 4  | 14 | 1  | 43.103 | 9.6   |           |          | 3800000   | 43.95  |
| Q8K2C9 | Very-long-chain (3R)-3-hydroxyacyl-CoA dehydratase 3 OS=Mus musculus GN=Hacd3 PE=1 SV=1                                              | 8.5635359 | 3  | 5  | 3  | 43.103 | 9.13  | 4300000   | 1900000  | 3600000   | 13.54  |
| Q7TNV0 | Protein DEK OS=Mus musculus GN=Dek PE=1 SV=1                                                                                         | 7.1052632 | 2  | 3  | 2  | 43.132 | 6.86  | 3400000   |          | 1700000   | 7.43   |
| Q9DBC7 | cAMP-dependent protein kinase type I-alpha regulatory subunit OS=Mus musculus GN=Pka RI1 OS=Mus musculus GN=Pka RI1                  | 16.7979   | 5  | 15 | 4  | 43.158 | 5.35  | 7200000   | 4100000  | 6200000   | 41.54  |
| Q6NTA4 | Ras-related GTP-binding protein B OS=Mus musculus GN=Rragb PE=1 SV=1                                                                 | 2.6737968 | 1  | 1  | 1  | 43.164 | 6.38  | 2100000   |          |           | 2.48   |
| P00158 | Cytochrome b OS=Mus musculus GN=Mt-Cyb PE=1 SV=1                                                                                     | 2.3622047 | 1  | 1  | 1  | 43.181 | 7.97  |           | 1600000  |           | 2.29   |
| P12849 | cAMP-dependent protein kinase type I-beta regulatory subunit OS=Mus musculus GN=Pka RI2 OS=Mus musculus GN=Pka RI2                   | 14.173228 | 4  | 12 | 3  | 43.197 | 5.96  | 4700000   | 1800000  | 4500000   | 31.22  |
| P35486 | Pyruvate dehydrogenase E1 component subunit alpha, somatic form, mitochondrial OS=Mus musculus GN=Pdh E1a OS=Mus musculus GN=Pdh E1a | 42.051282 | 17 | 56 | 17 | 43.204 | 8.19  | 60000000  | 32000000 | 54000000  | 152.20 |

|        |                                                                                        |           |    |    |    |        |      |           |          |           |        |
|--------|----------------------------------------------------------------------------------------|-----------|----|----|----|--------|------|-----------|----------|-----------|--------|
| Q8VDQ8 | NAD-dependent protein deacetylase sirtuin-2 OS=Mus musculus GN=Sirt2 PE=1 SV=2         | 17.48072  | 6  | 11 | 6  | 43.228 | 5.35 | 7300000   | 3600000  | 5600000   | 39.68  |
| Q9D517 | 1-acyl-sn-glycerol-3-phosphate acyltransferase gamma OS=Mus musculus GN=Agpat3 P       | 5.0531915 | 1  | 1  | 1  | 43.268 | 8.51 | 1000000   |          |           | 2.52   |
| Q8BWM0 | Prostaglandin E synthase 2 OS=Mus musculus GN=Ptges2 PE=1 SV=3                         | 3.3854167 | 1  | 1  | 1  | 43.296 | 9    |           |          | 560000    | 2.34   |
| Q80X73 | Protein pelota homolog OS=Mus musculus GN=Pelo PE=1 SV=3                               | 3.6363636 | 1  | 1  | 1  | 43.322 | 5.99 |           |          | 210000    | 2.81   |
| Q91VL8 | Telomeric repeat-binding factor 2-interacting protein 1 OS=Mus musculus GN=Terf2ip PE  | 4.0712468 | 1  | 1  | 1  | 43.326 | 4.81 | 280000    |          |           | 2.51   |
| Q8VHW2 | Voltage-dependent calcium channel gamma-8 subunit OS=Mus musculus GN=Cacng8 PE         | 8.9834515 | 2  | 4  | 2  | 43.426 | 9.2  | 4200000   | 1100000  | 3200000   | 14.57  |
| P31938 | Dual specificity mitogen-activated protein kinase kinase 1 OS=Mus musculus GN=Map2k    | 14.75827  | 5  | 9  | 5  | 43.446 | 6.7  | 3600000   | 1600000  | 2900000   | 31.72  |
| P54728 | UV excision repair protein RAD23 homolog B OS=Mus musculus GN=Rad23b PE=1 SV=          | 2.1634615 | 1  | 2  | 1  | 43.486 | 4.83 |           | 1600000  | 3100000   | 3.77   |
| O35465 | Peptidyl-prolyl cis-trans isomerase FKBP8 OS=Mus musculus GN=Fkbp8 PE=1 SV=2           | 11.19403  | 3  | 12 | 3  | 43.501 | 5.16 | 4000000   | 1700000  | 4000000   | 41.04  |
| P62881 | Guanine nucleotide-binding protein subunit beta-5 OS=Mus musculus GN=Gnb5 PE=1 SV      | 26.582278 | 8  | 25 | 8  | 43.537 | 6.46 | 9300000   | 5500000  | 11000000  | 74.61  |
| Q3THS6 | S-adenosylmethionine synthase isoform type-2 OS=Mus musculus GN=Mat2a PE=1 SV=         | 5.5696203 | 2  | 3  | 2  | 43.661 | 6.48 | 1800000   | 560000   |           | 9.13   |
| P50580 | Proliferation-associated protein 2G4 OS=Mus musculus GN=Pa2g4 PE=1 SV=3                | 14.974619 | 6  | 15 | 6  | 43.671 | 6.86 | 5800000   | 2500000  | 4700000   | 38.77  |
| Q8K4X7 | 1-acyl-sn-glycerol-3-phosphate acyltransferase delta OS=Mus musculus GN=Agpat4 PE=     | 5.5555556 | 2  | 2  | 2  | 43.781 | 8.38 | 2200000   |          |           | 4.43   |
| P11438 | Lysosome-associated membrane glycoprotein 1 OS=Mus musculus GN=Lamp1 PE=1 SV           | 8.3743842 | 3  | 11 | 3  | 43.837 | 8.4  | 3800000   | 4200000  | 5900000   | 30.28  |
| Q61733 | 28S ribosomal protein S31, mitochondrial OS=Mus musculus GN=Mrps31 PE=1 SV=1           | 3.3854167 | 1  | 3  | 1  | 43.854 | 8.51 | 1000000   | 960000   | 1100000   | 8.18   |
| Q9Z1G3 | V-type proton ATPase subunit C 1 OS=Mus musculus GN=Atp6v1c1 PE=1 SV=4                 | 27.748691 | 12 | 36 | 12 | 43.86  | 7.46 | 19000000  | 9100000  | 19000000  | 93.27  |
| Q9CY14 | Putative RNA-binding protein Luc7-like 1 OS=Mus musculus GN=Luc7l PE=1 SV=2            | 7.277628  | 2  | 2  | 1  | 43.907 | 9.88 |           |          | 260000    | 5.83   |
| Q921H8 | 3-ketoacyl-CoA thiolase A, peroxisomal OS=Mus musculus GN=Acaa1a PE=1 SV=1             | 3.3018868 | 1  | 3  | 1  | 43.926 | 8.44 | 2700000   | 1200000  | 1700000   | 7.71   |
| O54724 | Polymerase I and transcript release factor OS=Mus musculus GN=Ptrf PE=1 SV=1           | 13.520408 | 4  | 9  | 4  | 43.927 | 5.52 | 1300000   | 350000   | 1500000   | 23.42  |
| P48543 | G protein-activated inward rectifier potassium channel 3 OS=Mus musculus GN=Kcnj9 PE   | 4.5801527 | 1  | 2  | 1  | 43.946 | 5    | 170000    |          | 390000    | 5.46   |
| Q80YQ8 | Protein RMD5 homolog A OS=Mus musculus GN=Rmnd5a PE=1 SV=2                             | 2.8132992 | 1  | 1  | 1  | 43.964 | 6.06 | 670000    |          |           | 2.04   |
| P27601 | Guanine nucleotide-binding protein subunit alpha-13 OS=Mus musculus GN=Gna13 PE=       | 15.119363 | 5  | 13 | 4  | 44.027 | 8.21 | 4100000   | 250000   | 3400000   | 29.58  |
| P47809 | Dual specificity mitogen-activated protein kinase kinase 4 OS=Mus musculus GN=Map2k    | 7.3047859 | 2  | 3  | 2  | 44.085 | 8.07 | 1700000   | 450000   |           | 6.97   |
| Q99KJ8 | Dynactin subunit 2 OS=Mus musculus GN=Dctn2 PE=1 SV=3                                  | 30.348259 | 8  | 19 | 8  | 44.09  | 5.26 | 5000000   | 3100000  | 5900000   | 71.15  |
| Q99K70 | Ras-related GTP-binding protein C OS=Mus musculus GN=Rragc PE=1 SV=1                   | 9.5477387 | 3  | 8  | 3  | 44.093 | 5.1  | 2500000   | 1300000  | 2100000   | 24.36  |
| Q61187 | Tumor susceptibility gene 101 protein OS=Mus musculus GN=Tsg101 PE=1 SV=2              | 11.764706 | 4  | 7  | 4  | 44.096 | 6.71 | 1900000   | 870000   | 1000000   | 18.37  |
| Q9Z0H3 | SWI/SNF-related matrix-associated actin-dependent regulator of chromatin subfamily B m | 8.5714286 | 2  | 8  | 2  | 44.113 | 6.23 | 1400000   | 470000   | 1300000   | 24.53  |
| P62334 | 26S protease regulatory subunit 10B OS=Mus musculus GN=Psmc6 PE=1 SV=1                 | 12.85347  | 4  | 8  | 4  | 44.145 | 7.49 | 2400000   | 700000   | 1300000   | 20.59  |
| Q91Y86 | Mitogen-activated protein kinase 8 OS=Mus musculus GN=Mapk8 PE=1 SV=1                  | 7.8125    | 3  | 4  | 3  | 44.201 | 7.69 | 1400000   | 1200000  | 2100000   | 8.76   |
| P70429 | Ena/VASP-like protein OS=Mus musculus GN=Evl PE=1 SV=2                                 | 12.318841 | 3  | 6  | 3  | 44.31  | 8.85 | 1800000   | 610000   | 1400000   | 24.50  |
| Q8QZY9 | Splicing factor 3B subunit 4 OS=Mus musculus GN=Sf3b4 PE=1 SV=1                        | 3.3018868 | 1  | 2  | 1  | 44.327 | 8.56 |           | 1700000  | 2100000   | 6.45   |
| P97300 | Neuroplastin OS=Mus musculus GN=Nptn PE=1 SV=3                                         | 29.722922 | 13 | 67 | 13 | 44.345 | 7.74 | 110000000 | 96000000 | 130000000 | 191.79 |
| Q8R3V5 | Endophilin-B2 OS=Mus musculus GN=Sh3glb2 PE=1 SV=2                                     | 13.25     | 5  | 11 | 5  | 44.476 | 5.82 | 5900000   | 2900000  | 7800000   | 31.05  |
| Q921F2 | TAR DNA-binding protein 43 OS=Mus musculus GN=Tardbp PE=1 SV=1                         | 23.188406 | 6b | 14 | 6  | 44.519 | 6.7  | 6100000   | 2000000  | 5300000   | 39.45  |
| P09411 | Phosphoglycerate kinase 1 OS=Mus musculus GN=Pgk1 PE=1 SV=4                            | 38.609113 | 13 | 33 | 13 | 44.522 | 7.9  | 14000000  | 6500000  | 10000000  | 101.99 |
| A2ADY9 | Protein DDI1 homolog 2 OS=Mus musculus GN=Did2 PE=1 SV=1                               | 2.2556391 | 1  | 1  | 1  | 44.562 | 5.05 |           |          | 910000    | 2.42   |
| Q61081 | Hsp90 co-chaperone Cdc37 OS=Mus musculus GN=Cdc37 PE=1 SV=1                            | 13.192612 | 4  | 9  | 4  | 44.565 | 5.34 | 4800000   | 4100000  | 8600000   | 27.92  |
| Q5HZ12 | C2 calcium-dependent domain-containing protein 4C OS=Mus musculus GN=C2cd4cC2C         | 3.3412888 | 1  | 2  | 1  | 44.587 | 9.73 | 1400000   |          | 750000    | 4.73   |
| Q9WV54 | Acid ceramidase OS=Mus musculus GN=Asah1 PE=1 SV=1                                     | 7.6142132 | 3  | 5  | 3  | 44.641 | 8.46 | 3600000   | 2800000  |           | 13.33  |
| Q9CY58 | Plasminogen activator inhibitor 1 RNA-binding protein OS=Mus musculus GN=Serbp1 PE     | 20.14742  | 5  | 10 | 5  | 44.687 | 8.54 | 4200000   | 250000   | 1900000   | 30.55  |
| P61161 | Actin-related protein 2 OS=Mus musculus GN=Actr2 PE=1 SV=1                             | 21.319797 | 7  | 28 | 7  | 44.732 | 6.74 | 13000000  | 10000000 | 16000000  | 83.70  |
| Q8VE47 | Ubiquitin-like modifier-activating enzyme 5 OS=Mus musculus GN=Uba5 PE=1 SV=2          | 1.9851117 | 1  | 1  | 1  | 44.761 | 4.96 | 580000    |          |           | 1.99   |
| Q8VD63 | Testis-specific Y-encoded-like protein 4 OS=Mus musculus GN=Tspyl4 PE=1 SV=1           | 3.9408867 | 1  | 2  | 1  | 44.783 | 6.99 | 1300000   |          | 930000    | 4.85   |
| Q8QZT1 | Acetyl-CoA acetyltransferase, mitochondrial OS=Mus musculus GN=Acat1 PE=1 SV=1         | 28.301887 | 9  | 37 | 9  | 44.787 | 8.51 | 20000000  | 15000000 | 18000000  | 124.68 |
| P63037 | DnaJ homolog subfamily A member 1 OS=Mus musculus GN=Dnaj1 PE=1 SV=1                   | 10.327456 | 3  | 11 | 3  | 44.839 | 7.08 | 6900000   | 2800000  | 5100000   | 39.53  |
| Q9JMC3 | DnaJ homolog subfamily A member 4 OS=Mus musculus GN=Dnaj4 PE=1 SV=1                   | 2.7707809 | 1  | 3  | 1  | 44.873 | 7.58 | 1200000   | 470000   | 1300000   | 7.00   |
| Q9D7N3 | 28S ribosomal protein S9, mitochondrial OS=Mus musculus GN=Mrps9 PE=1 SV=3             | 2.8205128 | 1  | 1  | 1  | 44.901 | 8.81 | 900000    |          |           | 2.55   |
| Q8VE37 | Regulator of chromosome condensation OS=Mus musculus GN=Rcc1 PE=1 SV=1                 | 1.9002375 | 1  | 1  | 1  | 44.903 | 8.1  |           |          | 410000    | 1.93   |

|        |                                                                                       |           |    |    |    |        |       |          |          |          |        |
|--------|---------------------------------------------------------------------------------------|-----------|----|----|----|--------|-------|----------|----------|----------|--------|
| P18242 | Cathepsin D OS=Mus musculus GN=Ctsd PE=1 SV=1                                         | 11.219512 | 3  | 11 | 3  | 44.925 | 7.15  | 5800000  | 2000000  | 5600000  | 32.04  |
| Q9D7B6 | Isobutyryl-CoA dehydrogenase, mitochondrial OS=Mus musculus GN=Acad8 PE=1 SV=2        | 2.1791768 | 1  | 1  | 1  | 44.99  | 8.13  | 720000   |          |          | 2.04   |
| Q3UR59 | Coiled-coil domain-containing protein 51 OS=Mus musculus GN=Ccdc51 PE=1 SV=1          | 7.3891626 | 2  | 2  | 2  | 45.104 | 8.09  |          | 360000   | 230000   | 6.16   |
| Q60737 | Casein kinase II subunit alpha OS=Mus musculus GN=Csnk2a1 PE=1 SV=2                   | 30.179028 | 9  | 25 | 9  | 45.105 | 7.74  | 9000000  | 6600000  | 9300000  | 71.69  |
| Q80TL4 | PHD finger protein 24 OS=Mus musculus GN=Phf24 PE=1 SV=2                              | 33.25     | 10 | 32 | 10 | 45.194 | 5.77  | 21000000 | 10000000 | 23000000 | 109.01 |
| Q922E4 | Ethanolamine-phosphate cytidylyltransferase OS=Mus musculus GN=Pcyt2 PE=1 SV=1        | 2.2277228 | 1  | 1  | 1  | 45.207 | 6.58  |          |          | 880000   | 2.78   |
| Q99LR1 | Monoacylglycerol lipase ABHD12 OS=Mus musculus GN=Abhd12 PE=1 SV=2                    | 19.346734 | 5  | 12 | 5  | 45.241 | 8.72  | 3900000  | 1300000  | 2500000  | 38.07  |
| Q6PAK3 | Protein arginine N-methyltransferase 8 OS=Mus musculus GN=Prmt8 PE=1 SV=2             | 7.106599  | 3  | 8  | 1  | 45.247 | 6.93  |          | 960000   | 1900000  | 21.08  |
| Q9EPJ9 | ADP-ribosylation factor GTPase-activating protein 1 OS=Mus musculus GN=Arfgap1 PE=    | 34.299517 | 7  | 19 | 7  | 45.26  | 5.57  | 14000000 | 4900000  | 12000000 | 70.69  |
| Q8JZX4 | Splicing factor 45 OS=Mus musculus GN=Rbm17 PE=1 SV=1                                 | 2.962963  | 1  | 1  | 1  | 45.276 | 5.82  |          |          | 390000   | 2.47   |
| Q9WV31 | Activity-regulated cytoskeleton-associated protein OS=Mus musculus GN=Arc PE=1 SV=    | 4.040404  | 1  | 2  | 1  | 45.293 | 5.39  | 1500000  |          | 1500000  | 6.61   |
| Q89112 | LanC-like protein 1 OS=Mus musculus GN=Lancl1 PE=1 SV=1                               | 6.2656642 | 2  | 4  | 2  | 45.312 | 7.77  | 5700000  | 2900000  | 5500000  | 10.48  |
| P28656 | Nucleosome assembly protein 1-like 1 OS=Mus musculus GN=Nap111 PE=1 SV=2              | 7.4168798 | 2  | 4  | 1  | 45.317 | 4.46  | 2200000  | 1000000  | 2500000  | 10.68  |
| Q80VD1 | Protein FAM98B OS=Mus musculus GN=Fam98b PE=1 SV=1                                    | 2.7972028 | 1  | 3  | 1  | 45.321 | 8.5   | 2400000  | 650000   | 1700000  | 7.86   |
| P12367 | cAMP-dependent protein kinase type II-alpha regulatory subunit OS=Mus musculus GN=F   | 31.421446 | 10 | 27 | 8  | 45.361 | 4.89  | 16000000 | 5700000  | 17000000 | 79.45  |
| Q9WV69 | Dematin OS=Mus musculus GN=Dmtn PE=1 SV=1                                             | 14.567901 | 5  | 13 | 5  | 45.44  | 8.41  | 4500000  | 1200000  | 8500000  | 35.65  |
| Q9R0N7 | Synaptotagmin-7 OS=Mus musculus GN=Syt7 PE=1 SV=1                                     | 7.1960298 | 2  | 4  | 2  | 45.444 | 9.28  | 5100000  | 2300000  | 5500000  | 10.09  |
| Q99J14 | 26S proteasome non-ATPase regulatory subunit 6 OS=Mus musculus GN=Psm6 PE=1 S         | 8.9974293 | 3  | 6  | 3  | 45.507 | 5.52  | 2600000  | 1200000  | 1400000  | 16.43  |
| Q8BU14 | Translocation protein SEC62 OS=Mus musculus GN=Sec62 PE=1 SV=1                        | 2.2613065 | 1  | 1  | 1  | 45.552 | 7.31  | 1100000  |          |          | 2.53   |
| P62196 | 26S protease regulatory subunit 8 OS=Mus musculus GN=Psmc5 PE=1 SV=1                  | 15.763547 | 5  | 10 | 5  | 45.597 | 7.55  | 3000000  | 1700000  | 2100000  | 29.90  |
| P17047 | Lysosome-associated membrane glycoprotein 2 OS=Mus musculus GN=Lamp2 PE=1 SV          | 1.9277108 | 1  | 2  | 1  | 45.652 | 7.39  | 1900000  |          | 2800000  | 4.41   |
| Q8VE62 | Polyadenylate-binding protein-interacting protein 1 OS=Mus musculus GN=Paip1 PE=1 S   | 2.75      | 1  | 1  | 1  | 45.673 | 4.55  | 1100000  |          |          | 2.07   |
| Q91XD7 | Cysteine-rich with EGF-like domain protein 1 OS=Mus musculus GN=Credl1 PE=1 SV=1      | 14.761905 | 6  | 11 | 6  | 45.687 | 5.02  | 3500000  | 2700000  | 5200000  | 31.49  |
| Q9Z2X1 | Heterogeneous nuclear ribonucleoprotein F OS=Mus musculus GN=Hnrnpf PE=1 SV=3         | 15.903614 | 4  | 5  | 3  | 45.701 | 5.49  |          | 760000   | 4900000  | 17.69  |
| Q8BLF1 | Neutral cholesterol ester hydrolase 1 OS=Mus musculus GN=Nceh1 PE=1 SV=1              | 5.3921569 | 2  | 6  | 2  | 45.711 | 7.05  | 14000000 | 5900000  | 9200000  | 16.80  |
| Q9QYJ0 | DnaJ homolog subfamily A member 2 OS=Mus musculus GN=Dnaj2 PE=1 SV=1                  | 27.669903 | 8  | 14 | 8  | 45.717 | 6.48  | 4900000  | 2400000  | 5600000  | 41.60  |
| Q5DU31 | Interactor protein for cytohesin exchange factors 1 OS=Mus musculus GN=Ipcef1 PE=1 S  | 3.6945813 | 1  | 1  | 1  | 45.784 | 6.73  |          |          | 660000   | 3.59   |
| Q923Z0 | G-protein coupled receptor family C group 5 member B OS=Mus musculus GN=Gprc5b P      | 2.9268293 | 1  | 1  | 1  | 45.869 | 8.38  | 1900000  |          |          | 3.24   |
| Q99KU0 | Vacuole membrane protein 1 OS=Mus musculus GN=Vmp1 PE=1 SV=2                          | 3.9408867 | 1  | 2  | 1  | 45.931 | 6.95  | 2700000  |          |          | 3.09   |
| Q64519 | Syndecan-3 OS=Mus musculus GN=Sdc3 PE=1 SV=2                                          | 2.4886878 | 1  | 3  | 1  | 45.973 | 4.59  | 4200000  | 4500000  | 5200000  | 8.39   |
| P07758 | Alpha-1-antitrypsin 1-1 OS=Mus musculus GN=Serpina1a PE=1 SV=4                        | 4.6004843 | 1  | 2  | 1  | 45.974 | 5.72  | 870000   | 820000   |          | 8.05   |
| Q9JK42 | [Pyruvate dehydrogenase (acetyl-transferring)] kinase isozyme 2, mitochondrial OS=Mus | 13.022113 | 4  | 7  | 4  | 46.011 | 6.61  | 2200000  | 1700000  | 1500000  | 19.93  |
| P27659 | 60S ribosomal protein L3 OS=Mus musculus GN=Rpl3 PE=1 SV=3                            | 13.399504 | 5  | 9  | 5  | 46.081 | 10.21 | 15000000 | 2100000  | 4100000  | 25.04  |
| O70172 | Phosphatidylinositol 5-phosphate 4-kinase type-2 alpha OS=Mus musculus GN=Pip4k2a     | 15.061728 | 5  | 15 | 2  | 46.122 | 6.99  | 7300000  | 5400000  | 4600000  | 41.71  |
| P60843 | Eukaryotic initiation factor 4A-I OS=Mus musculus GN=Eif4a1 PE=1 SV=1                 | 18.719212 | 8  | 27 | 4  | 46.125 | 5.48  | 4300000  | 1500000  | 2600000  | 73.31  |
| P31324 | cAMP-dependent protein kinase type II-beta regulatory subunit OS=Mus musculus GN=Pr   | 38.461538 | 12 | 40 | 10 | 46.138 | 4.98  | 20000000 | 8000000  | 20000000 | 140.74 |
| Q9QZB7 | Actin-related protein 10 OS=Mus musculus GN=Actr10 PE=1 SV=2                          | 9.352518  | 2  | 2  | 2  | 46.178 | 7.61  | 2400000  |          | 360000   | 5.83   |
| E9Q4P1 | WD repeat and FYVE domain-containing protein 1 OS=Mus musculus GN=Wdfy1 PE=1 S        | 3.4146341 | 1  | 1  | 1  | 46.187 | 7.34  | 2800000  |          |          | 3.36   |
| Q9CQS4 | Solute carrier family 25 member 46 OS=Mus musculus GN=Slc25a46 PE=1 SV=1              | 2.3923445 | 1  | 1  | 1  | 46.195 | 7.64  | 2800000  |          |          | 2.67   |
| P05201 | Aspartate aminotransferase, cytoplasmic OS=Mus musculus GN=Got1 PE=1 SV=3             | 29.539952 | 10 | 24 | 10 | 46.219 | 7.14  | 10000000 | 4400000  | 8300000  | 66.57  |
| Q9QX11 | Cytohesin-1 OS=Mus musculus GN=Cyth1 PE=1 SV=2                                        | 11.557789 | 3  | 4  | 2  | 46.244 | 5.63  |          |          | 520000   | 11.52  |
| O08967 | Cytohesin-3 OS=Mus musculus GN=Cyth3 PE=1 SV=1                                        | 8.0200501 | 2  | 3  | 1  | 46.25  | 5.54  | 2400000  |          |          | 10.18  |
| O88544 | COP9 signalosome complex subunit 4 OS=Mus musculus GN=Cops4 PE=1 SV=1                 | 9.1133005 | 3  | 8  | 3  | 46.256 | 5.83  | 1600000  | 1100000  | 2100000  | 23.39  |
| Q8R0A7 | Uncharacterized protein KIAA0513 OS=Mus musculus GN=Kiaa0513 PE=1 SV=1                | 16.461916 | 6  | 13 | 6  | 46.289 | 5.02  | 15000000 | 4800000  | 14000000 | 37.48  |
| Q9JH15 | Isovaleryl-CoA dehydrogenase, mitochondrial OS=Mus musculus GN=Ivd PE=1 SV=1          | 10.141509 | 4  | 10 | 4  | 46.296 | 8.29  | 3600000  | 2300000  | 3800000  | 28.59  |
| Q9CZC8 | Secernin-1 OS=Mus musculus GN=Scrn1 PE=1 SV=1                                         | 32.608696 | 11 | 29 | 11 | 46.297 | 4.79  | 7900000  | 5100000  | 12000000 | 83.64  |
| Q640R3 | Hepatocyte cell adhesion molecule OS=Mus musculus GN=Hepacam PE=1 SV=2                | 4.5454545 | 1  | 3  | 1  | 46.338 | 9.42  | 6100000  | 1800000  | 3600000  | 9.59   |
| P10630 | Eukaryotic initiation factor 4A-II OS=Mus musculus GN=Eif4a2 PE=1 SV=2                | 22.604423 | 8  | 27 | 4  | 46.373 | 5.48  | 7600000  | 2400000  | 4300000  | 73.87  |

|        |                                                                                          |           |    |    |    |        |      |          |          |          |        |
|--------|------------------------------------------------------------------------------------------|-----------|----|----|----|--------|------|----------|----------|----------|--------|
| Q91W90 | Thioredoxin domain-containing protein 5 OS=Mus musculus GN=Txndc5 PE=1 SV=2              | 3.8369305 | 1  | 4  | 1  | 46.386 | 5.78 | 970000   | 1100000  | 1900000  | 14.83  |
| Q9D7N9 | Adipocyte plasma membrane-associated protein OS=Mus musculus GN=Apmmap PE=1 SV=1         | 5.060241  | 2  | 2  | 2  | 46.405 | 6.32 | 3800000  | 4500000  |          | 5.24   |
| P45952 | Medium-chain specific acyl-CoA dehydrogenase, mitochondrial OS=Mus musculus GN=A         | 5.7007126 | 2  | 5  | 2  | 46.452 | 8.37 | 3600000  | 2300000  | 3400000  | 13.27  |
| Q8R570 | Synaptosomal-associated protein 47 OS=Mus musculus GN=Snap47 PE=1 SV=1                   | 23.244552 | 7  | 19 | 7  | 46.495 | 5.76 | 6700000  | 4000000  | 7000000  | 64.56  |
| Q3U1F9 | Phosphoprotein associated with glycosphingolipid-enriched microdomains 1 OS=Mus mus      | 6.7599068 | 1  | 1  | 1  | 46.52  | 4.81 |          |          | 900000   | 4.90   |
| P16460 | Argininosuccinate synthase OS=Mus musculus GN=Ass1 PE=1 SV=1                             | 7.038835  | 2  | 4  | 2  | 46.555 | 8.22 | 9500000  | 4900000  | 4500000  | 13.75  |
| Q7TNC4 | Putative RNA-binding protein Luc7-like 2 OS=Mus musculus GN=Luc7l2 PE=1 SV=1             | 10.714286 | 3  | 5  | 2  | 46.555 | 10.1 | 3800000  |          | 2700000  | 16.48  |
| P63034 | Cytohesin-2 OS=Mus musculus GN=Cyht2 PE=1 SV=2                                           |           | 9  | 3  | 6  | 46.556 | 5.63 | 1100000  | 640000   | 2100000  | 17.48  |
| O55028 | [3-methyl-2-oxobutanoate dehydrogenase [lipoamide]] kinase, mitochondrial OS=Mus mus     | 3.1553398 | 1  | 1  | 1  | 46.558 | 8.91 |          | 220000   |          | 2.10   |
| Q6P8X1 | Sorting nexin-6 OS=Mus musculus GN=Snx6 PE=1 SV=2                                        | 2.7093596 | 1  | 3  | 1  | 46.62  | 6.16 | 1700000  | 860000   | 2000000  | 7.74   |
| P63005 | Platelet-activating factor acetylhydrolase IB subunit alpha OS=Mus musculus GN=Pafah1    | 27.560976 | 9  | 26 | 8  | 46.64  | 7.37 | 15000000 | 6100000  | 11000000 | 74.04  |
| Q88844 | Isocitrate dehydrogenase [NADP] cytoplasmic OS=Mus musculus GN=ldh1 PE=1 SV=2            | 2.173913  | 1  | 3  | 1  | 46.644 | 7.17 | 2600000  | 1300000  | 2200000  | 6.40   |
| Q920N7 | Synaptotagmin-12 OS=Mus musculus GN=Syt12 PE=1 SV=1                                      | 8.0760095 | 3  | 4  | 3  | 46.651 | 5.64 | 3900000  |          |          | 9.98   |
| Q9WV60 | Glycogen synthase kinase-3 beta OS=Mus musculus GN=Gsk3b PE=1 SV=2                       | 13.333333 | 3  | 5  | 2  | 46.681 | 8.78 | 6300000  | 3200000  | 2800000  | 14.55  |
| P59017 | Bcl-2-like protein 13 OS=Mus musculus GN=Bcl2l13 PE=1 SV=2                               | 5.2995392 | 2  | 5  | 2  | 46.691 | 4.59 | 2700000  | 1100000  | 2800000  | 12.10  |
| Q9D8U8 | Sorting nexin-5 OS=Mus musculus GN=Snx5 PE=1 SV=1                                        | 5.4455446 | 2  | 3  | 2  | 46.768 | 6.62 |          | 710000   | 1600000  | 7.92   |
| Q91VC3 | Eukaryotic initiation factor 4A-III OS=Mus musculus GN=Eif4a3 PE=1 SV=3                  | 9.9756691 | 4  | 7  | 4  | 46.81  | 6.73 | 4000000  | 2400000  | 2800000  | 18.56  |
| Q9Z2l8 | Succinate--CoA ligase [GDP-forming] subunit beta, mitochondrial OS=Mus musculus GN=      | 7.1593533 | 2  | 3  | 2  | 46.811 | 7.02 | 1300000  | 520000   | 1500000  | 9.39   |
| Q9CZN4 | Protein shisa-9 OS=Mus musculus GN=Shisa9 PE=1 SV=2                                      | 3.5377358 | 1  | 1  | 1  | 46.812 | 8.62 | 1500000  |          |          | 2.76   |
| Q9D1Q6 | Endoplasmic reticulum resident protein 44 OS=Mus musculus GN=Erp44 PE=1 SV=1             | 18.472906 | 6  | 14 | 5  | 46.823 | 5.27 | 4100000  | 1900000  | 2200000  | 37.27  |
| Q9ER58 | Testican-2 OS=Mus musculus GN=Spock2 PE=1 SV=1                                           | 6.1465721 | 2  | 4  | 2  | 46.833 | 4.87 | 1100000  | 1500000  | 2100000  | 13.33  |
| Q99MR0 | Actin-like protein 6B OS=Mus musculus GN=Actl6b PE=1 SV=1                                | 2.3474178 | 1  | 1  | 1  | 46.861 | 5.71 | 300000   |          |          | 1.87   |
| Q8R2R9 | AP-3 complex subunit mu-2 OS=Mus musculus GN=Ap3m2 PE=1 SV=1                             | 5.9808612 | 2  | 3  | 2  | 46.886 | 7.56 | 2200000  | 770000   |          | 8.26   |
| Q3TCJ1 | BRISC complex subunit Abro1 OS=Mus musculus GN=Fam175b PE=1 SV=1                         | 3.1325301 | 1  | 2  | 1  | 46.914 | 6.18 | 840000   |          | 820000   | 3.93   |
| Q8BWG8 | Beta-arrestin-1 OS=Mus musculus GN=Arrb1 PE=1 SV=1                                       | 10.526316 | 3  | 5  | 3  | 46.943 | 6.28 | 1100000  | 300000   | 720000   | 13.73  |
| Q9ESW4 | Acyglycerol kinase, mitochondrial OS=Mus musculus GN=Agk PE=1 SV=1                       | 16.389549 | 6  | 9  | 6  | 46.946 | 8.4  | 6000000  | 2300000  | 2900000  | 23.19  |
| P30275 | Creatine kinase U-type, mitochondrial OS=Mus musculus GN=Ckmt1 PE=1 SV=1                 | 29.665072 | 10 | 33 | 10 | 46.974 | 8.16 | 36000000 | 20000000 | 22000000 | 102.61 |
| Q9DCL9 | Multifunctional protein ADE2 OS=Mus musculus GN=Paics PE=1 SV=4                          | 4.2352941 | 1  | 3  | 1  | 46.976 | 7.23 | 2000000  | 1300000  | 1800000  | 9.08   |
| Q99JX3 | Golgi reassembly-stacking protein 2 OS=Mus musculus GN=Gorasp2 PE=1 SV=3                 | 6.2084257 | 2  | 4  | 2  | 47.009 | 4.79 | 1800000  | 1600000  | 1300000  | 10.87  |
| Q60634 | Flotillin-2 OS=Mus musculus GN=Flot2 PE=1 SV=2                                           | 24.766355 | 10 | 18 | 10 | 47.009 | 5.2  | 5900000  | 4400000  | 5000000  | 53.79  |
| Q62443 | Neuronal pentraxin-1 OS=Mus musculus GN=Nptx1 PE=1 SV=1                                  | 10.648148 | 4  | 8  | 4  | 47.088 | 6.44 | 4300000  | 2900000  | 4600000  | 22.85  |
| P16330 | 2',3'-cyclic-nucleotide 3'-phosphodiesterase OS=Mus musculus GN=Cnp PE=1 SV=3            | 38.333333 | 18 | 55 | 18 | 47.094 | 8.97 | 77000000 | 25000000 | 66000000 | 173.71 |
| Q8R127 | Saccharopine dehydrogenase-like oxidoreductase OS=Mus musculus GN=Scppdh PE=1            | 2.0979021 | 1  | 2  | 1  | 47.099 | 8.6  | 3200000  |          | 2100000  | 4.06   |
| P17182 | Alpha-enolase OS=Mus musculus GN=Eno1 PE=1 SV=3                                          | 39.861751 | 14 | 38 | 12 | 47.111 | 6.8  | 13000000 | 12000000 | 14000000 | 113.37 |
| Q9D8E6 | 60S ribosomal protein L4 OS=Mus musculus GN=Rpl4 PE=1 SV=3                               | 23.627685 | 9  | 22 | 9  | 47.124 | 11   | 28000000 | 11000000 | 14000000 | 62.68  |
| Q64345 | Interferon-induced protein with tetratricopeptide repeats 3 OS=Mus musculus GN=Iftit3 PE | 2.2332506 | 1  | 3  | 1  | 47.192 | 5.64 | 4800000  | 2400000  | 3700000  | 8.88   |
| P46097 | Synaptotagmin-2 OS=Mus musculus GN=Syt2 PE=1 SV=1                                        | 23.933649 | 10 | 34 | 4  | 47.232 | 7.99 | 4600000  | 1300000  | 2100000  | 96.60  |
| P17183 | Gamma-enolase OS=Mus musculus GN=Eno2 PE=1 SV=2                                          | 31.105991 | 9  | 26 | 7  | 47.267 | 5.11 | 6100000  | 6600000  | 5000000  | 86.68  |
| Q80Xl4 | Phosphatidylinositol 5-phosphate 4-kinase type-2 beta OS=Mus musculus GN=Pip4k2b P       | 18.269231 | 6  | 21 | 3  | 47.289 | 7.33 | 10000000 | 4000000  | 7400000  | 62.73  |
| Q9JJC6 | RILP-like protein 1 OS=Mus musculus GN=Rilpl1 PE=1 SV=1                                  | 7.635468  | 1  | 1  | 1  | 47.294 | 5.16 |          |          | 1600000  | 4.93   |
| Q8BP71 | RNA binding protein fox-1 homolog 2 OS=Mus musculus GN=Rbfox2 PE=1 SV=2                  | 3.3407572 | 1  | 3  | 1  | 47.301 | 6.55 | 1300000  | 1600000  | 2700000  | 6.89   |
| Q91XU3 | Phosphatidylinositol 5-phosphate 4-kinase type-2 gamma OS=Mus musculus GN=Pip4k2         | 4.0380048 | 1  | 3  | 1  | 47.306 | 6.89 |          | 1400000  |          | 8.58   |
| Q6P8K8 | Carboxypeptidase A4 OS=Mus musculus GN=Cpa4 PE=2 SV=2                                    | 1.9047619 | 1  | 1  | 1  | 47.309 | 6.61 |          |          | 530000   | 2.02   |
| Q99JY9 | Actin-related protein 3 OS=Mus musculus GN=Actr3 PE=1 SV=3                               | 23.205742 | 8  | 31 | 7  | 47.327 | 5.88 | 19000000 | 11000000 | 19000000 | 97.22  |
| Q9DBE8 | Alpha-1,3/1,6-mannosyltransferase ALG2 OS=Mus musculus GN=Alg2 PE=1 SV=2                 | 6.0240964 | 2  | 4  | 2  | 47.374 | 7.97 | 1100000  | 1100000  |          | 10.17  |
| Q9CZP5 | Mitochondrial chaperone BCS1 OS=Mus musculus GN=Bcs1l PE=1 SV=1                          | 4.5454545 | 2  | 3  | 2  | 47.376 | 7.93 |          | 1000000  | 1000000  | 6.20   |
| P54775 | 26S protease regulatory subunit 6B OS=Mus musculus GN=Psmc4 PE=1 SV=2                    | 11.722488 | 5  | 7  | 5  | 47.379 | 5.21 | 1500000  | 320000   | 1400000  | 21.74  |
| P05202 | Aspartate aminotransferase, mitochondrial OS=Mus musculus GN=Got2 PE=1 SV=1              | 26.511628 | 11 | 55 | 11 | 47.381 | 9    | 80000000 | 30000000 | 58000000 | 156.57 |



|        |                                                                                         |           |    |     |    |        |       |           |          |           |        |
|--------|-----------------------------------------------------------------------------------------|-----------|----|-----|----|--------|-------|-----------|----------|-----------|--------|
| Q922R1 | UPF0183 protein C16orf70 homolog OS=Mus musculus PE=1 SV=2                              | 2.3696682 | 1  | 3   | 1  | 47.386 | 7.74  | 1100000   | 540000   | 1100000   | 8.49   |
| P46096 | Synaptotagmin-1 OS=Mus musculus GN=Syt1 PE=1 SV=1                                       | 41.330166 | 19 | 107 | 12 | 47.388 | 8.53  | 170000000 | 52000000 | 110000000 | 322.71 |
| Q8BG32 | 26S proteasome non-ATPase regulatory subunit 11 OS=Mus musculus GN=Psm11 PE=            | 6.1611374 | 2  | 4   | 2  | 47.407 | 6.48  | 3600000   | 940000   | 2600000   | 13.27  |
| Q7TQ95 | Protein lunapark OS=Mus musculus GN=Lnp PE=1 SV=1                                       | 10.352941 | 4  | 11  | 4  | 47.47  | 5.27  | 2400000   | 680000   | 1900000   | 31.60  |
| O08917 | Flotillin-1 OS=Mus musculus GN=Flot1 PE=1 SV=1                                          | 26.168224 | 9  | 19  | 9  | 47.484 | 7.15  | 5100000   | 2900000  | 4500000   | 58.01  |
| Q8BLQ9 | Cell adhesion molecule 2 OS=Mus musculus GN=Cadm2 PE=1 SV=2                             | 21.609195 | 8  | 31  | 8  | 47.529 | 5.41  | 40000000  | 41000000 | 58000000  | 108.89 |
| Q641P0 | Actin-related protein 3B OS=Mus musculus GN=Actr3b PE=1 SV=1                            | 19.37799  | 6  | 18  | 5  | 47.549 | 6.02  | 3400000   | 1900000  | 3300000   | 49.10  |
| Q60972 | Histone-binding protein RBBP4 OS=Mus musculus GN=Rbbp4 PE=1 SV=5                        | 21.882353 | 8  | 16  | 4  | 47.626 | 4.89  | 4500000   | 3300000  | 5000000   | 43.31  |
| Q91VZ6 | Stromal membrane-associated protein 1 OS=Mus musculus GN=Smap1 PE=1 SV=1                | 2.5       | 1  | 3   | 1  | 47.63  | 8.51  | 3800000   | 1700000  | 5500000   | 8.47   |
| O88712 | C-terminal-binding protein 1 OS=Mus musculus GN=Ctbp1 PE=1 SV=2                         | 21.995465 | 8  | 22  | 8  | 47.715 | 6.77  | 7400000   | 5000000  | 11000000  | 72.25  |
| P32067 | Lupus La protein homolog OS=Mus musculus GN=Ssb PE=1 SV=1                               | 16.385542 | 6  | 11  | 6  | 47.727 | 9.77  | 7400000   | 1400000  | 3100000   | 30.81  |
| Q8BK72 | 28S ribosomal protein S27, mitochondrial OS=Mus musculus GN=Mrps27 PE=1 SV=2            | 5.5421687 | 2  | 2   | 2  | 47.748 | 5.5   |           |          | 1500000   | 5.74   |
| Q60973 | Histone-binding protein RBBP7 OS=Mus musculus GN=Rbbp7 PE=1 SV=1                        | 10.823529 | 5  | 8   | 1  | 47.76  | 5.05  |           |          | 1700000   | 19.32  |
| O88543 | COP9 signalosome complex subunit 3 OS=Mus musculus GN=Cops3 PE=1 SV=3                   | 7.5650118 | 2  | 5   | 2  | 47.801 | 6.65  | 1500000   | 730000   | 780000    | 16.08  |
| P51174 | Long-chain specific acyl-CoA dehydrogenase, mitochondrial OS=Mus musculus GN=Acad       | 16.511628 | 5  | 14  | 5  | 47.877 | 8.31  | 6300000   | 2600000  | 5500000   | 48.51  |
| Q922H2 | [Pyruvate dehydrogenase (acetyl-transferring)] kinase isozyme 3, mitochondrial OS=Mus   | 5.5421687 | 2  | 5   | 2  | 47.893 | 8.82  | 1800000   | 1000000  | 710000    | 12.93  |
| Q99KH8 | Serine/threonine-protein kinase 24 OS=Mus musculus GN=Stk24 PE=1 SV=1                   | 12.064965 | 4  | 5   | 4  | 47.924 | 5.43  | 2400000   | 980000   | 4100000   | 13.98  |
| P14211 | Calreticulin OS=Mus musculus GN=Calr PE=1 SV=1                                          | 52.644231 | 18 | 65  | 18 | 47.965 | 4.49  | 23000000  | 14000000 | 27000000  | 213.86 |
| Q9CQC6 | Basic leucine zipper and W2 domain-containing protein 1 OS=Mus musculus GN=Bzw1 P       | 1.6706444 | 1  | 1   | 1  | 48.013 | 5.92  | 1900000   |          |           | 1.84   |
| Q99KK2 | N-acylneuraminate cytidyltransferase OS=Mus musculus GN=Cmas PE=1 SV=2                  | 16.898148 | 6  | 9   | 6  | 48.028 | 8.1   | 8400000   |          | 3600000   | 23.31  |
| Q922R8 | Protein disulfide-isomerase A6 OS=Mus musculus GN=Pdia6 PE=1 SV=3                       | 19.318182 | 6  | 13  | 6  | 48.07  | 5.14  | 7400000   | 4800000  | 5700000   | 39.05  |
| Q64337 | Sequestosome-1 OS=Mus musculus GN=Sqstm1 PE=1 SV=1                                      | 20.135747 | 4  | 7   | 4  | 48.132 | 5.21  | 2100000   | 1100000  | 2100000   | 20.21  |
| Q9QWL7 | SWISS-PROT:Q9QWL7 Tax_Id=10090 Gene_Symbol=Krt17 Keratin, type I x                      | 30.254042 | 15 | 47  | 3  | 48.132 | 5.06  | 1200000   |          | 4300000   | 126.95 |
| Q60780 | Growth arrest-specific protein 7 OS=Mus musculus GN=Gas7 PE=1 SV=1                      | 23.515439 | 8  | 17  | 8  | 48.143 | 7.83  | 4600000   | 2700000  | 5500000   | 46.36  |
| O09161 | Calsequestrin-2 OS=Mus musculus GN=Casq2 PE=1 SV=3                                      | 3.1325301 | 1  | 1   | 1  | 48.146 | 4.27  |           |          | 1400000   | 2.79   |
| Q99N87 | 28S ribosomal protein S5, mitochondrial OS=Mus musculus GN=Mrps5 PE=1 SV=1              | 2.7777778 | 1  | 1   | 1  | 48.176 | 10.14 | 1400000   |          |           | 1.82   |
| Q9DB77 | Cytochrome b-c1 complex subunit 2, mitochondrial OS=Mus musculus GN=Uqcrc2 PE=1         | 38.852097 | 14 | 41  | 14 | 48.205 | 9.25  | 46000000  | 34000000 | 38000000  | 142.76 |
| Q3TIV5 | Zinc finger CCCH domain-containing protein 15 OS=Mus musculus GN=Zc3h15 PE=1 SV         | 6.1032864 | 2  | 3   | 2  | 48.297 | 5.3   | 1400000   |          | 1100000   | 8.10   |
| Q921S7 | 39S ribosomal protein L37, mitochondrial OS=Mus musculus GN=Mrpl37 PE=1 SV=1            | 4.2553191 | 1  | 2   | 1  | 48.31  | 8.84  |           | 890000   | 910000    | 5.10   |
| P29758 | Ornithine aminotransferase, mitochondrial OS=Mus musculus GN=Oat PE=1 SV=1              | 3.1890661 | 1  | 2   | 1  | 48.324 | 6.62  | 2300000   |          | 2300000   | 5.52   |
| Q60749 | KH domain-containing, RNA-binding, signal transduction-associated protein 1 OS=Mus m    | 5.1918736 | 3  | 8   | 2  | 48.34  | 8.72  | 7800000   | 1400000  | 4700000   | 27.56  |
| P35585 | AP-1 complex subunit mu-1 OS=Mus musculus GN=Ap1m1 PE=1 SV=3                            | 18.91253  | 6  | 11  | 6  | 48.512 | 7.3   | 2800000   | 1200000  | 2500000   | 27.47  |
| Q99JB8 | Protein kinase C and casein kinase II substrate protein 3 OS=Mus musculus GN=Pacsin3    | 8.0188679 | 2  | 5   | 2  | 48.555 | 6.1   | 730000    | 310000   | 810000    | 15.19  |
| Q60759 | Glutaryl-CoA dehydrogenase, mitochondrial OS=Mus musculus GN=Gcdh PE=1 SV=2             | 3.196347  | 1  | 2   | 1  | 48.575 | 8.73  | 1900000   |          | 2000000   | 5.28   |
| P46471 | 26S protease regulatory subunit 7 OS=Mus musculus GN=Psmc2 PE=1 SV=5                    | 15.011547 | 5  | 11  | 5  | 48.617 | 5.95  | 4600000   | 1900000  | 4000000   | 35.46  |
| Q62418 | Drebrin-like protein OS=Mus musculus GN=Dbnl PE=1 SV=2                                  | 35.550459 | 11 | 41  | 11 | 48.67  | 4.92  | 7000000   | 5400000  | 9300000   | 134.25 |
| Q3TPE9 | Ankyrin repeat and MYND domain-containing protein 2 OS=Mus musculus GN=Ankmy2 F         | 2.5       | 1  | 1   | 1  | 48.742 | 6.67  | 870000    |          |           | 2.76   |
| Q8C4X2 | Casein kinase I isoform gamma-3 OS=Mus musculus GN=Csnk1g3 PE=1 SV=2                    | 1.8867925 | 1  | 1   | 1  | 48.907 | 9.11  |           |          |           | 1.87   |
| P59325 | Eukaryotic translation initiation factor 5 OS=Mus musculus GN=Elf5 PE=1 SV=1            | 6.7599068 | 2  | 3   | 2  | 48.938 | 5.52  | 3000000   |          | 2300000   | 8.03   |
| Q5DTY9 | BTB/POZ domain-containing protein KCTD16 OS=Mus musculus GN=Kctd16 PE=1 SV=2            | 9.8360656 | 3  | 5   | 3  | 48.941 | 8.19  | 9000000   |          | 5400000   | 15.12  |
| Q9D2G2 | Dihydrodipolyllysine-residue succinyltransferase component of 2-oxoglutarate dehydrogen | 22.687225 | 8  | 21  | 8  | 48.963 | 8.95  | 9200000   | 9800000  | 11000000  | 61.84  |
| Q8BFF9 | [Pyruvate dehydrogenase (acetyl-transferring)] kinase isozyme 1, mitochondrial OS=Mus   | 2.0737327 | 1  | 1   | 1  | 48.964 | 8.19  | 3100000   |          |           | 2.00   |
| O54734 | Dolichyl-diphosphooligosaccharide--protein glycosyltransferase 48 kDa subunit OS=Mus    | 8.1632653 | 3  | 7   | 3  | 48.997 | 5.83  | 4300000   | 4200000  | 6000000   | 17.73  |
| Q9D3A9 | Protein tweety homolog 1 OS=Mus musculus GN=Ttyh1 PE=1 SV=1                             | 2.8888889 | 1  | 1   | 1  | 49.001 | 5.03  |           |          | 1200000   | 2.34   |
| Q9Z1N5 | Spliceosome RNA helicase Ddx39b OS=Mus musculus GN=Ddx39b PE=1 SV=1                     | 12.850467 | 5  | 16  | 5  | 49.004 | 5.67  | 9300000   | 1400000  | 3700000   | 43.08  |
| Q8CI61 | BAG family molecular chaperone regulator 4 OS=Mus musculus GN=Bag4 PE=1 SV=2            | 3.7199125 | 1  | 1   | 1  | 49.064 | 5.34  |           |          | 1100000   | 3.94   |
| P62192 | 26S protease regulatory subunit 4 OS=Mus musculus GN=Psmc1 PE=1 SV=1                    | 9.0909091 | 3  | 8   | 3  | 49.154 | 6.21  | 2300000   | 1200000  | 2000000   | 31.70  |
| O35737 | Heterogeneous nuclear ribonucleoprotein H OS=Mus musculus GN=Hnrnp1 PE=1 SV=3           | 22.717149 | 7  | 24  | 2  | 49.168 | 6.3   | 7900000   | 2100000  | 3300000   | 83.02  |

|          |                                                                                     |           |    |     |    |        |      |           |           |           |         |
|----------|-------------------------------------------------------------------------------------|-----------|----|-----|----|--------|------|-----------|-----------|-----------|---------|
| P70333   | Heterogeneous nuclear ribonucleoprotein H2 OS=Mus musculus GN=Hnrnp2 PE=1 SV=       | 21.603563 | 6  | 23  | 2  | 49.248 | 6.3  | 8000000   | 5200000   | 7200000   | 83.22   |
| Q63912   | Oligodendrocyte-myelin glycoprotein OS=Mus musculus GN=Omg PE=1 SV=1                | 8.8636364 | 4  | 11  | 4  | 49.252 | 8.41 | 11000000  | 6300000   | 7400000   | 27.46   |
| Q5NCE8   | Magnesium transporter MRS2 homolog, mitochondrial OS=Mus musculus GN=Mrs2 PE=2      | 2.3041475 | 1  | 1   | 1  | 49.268 | 7.53 | 1300000   |           |           | 3.02    |
| Q9JIY5   | Serine protease HTRA2, mitochondrial OS=Mus musculus GN=Htra2 PE=1 SV=2             | 2.6200873 | 1  | 1   | 1  | 49.318 | 9.6  | 1900000   |           |           | 2.50    |
| A2BDX3   | Adenylyltransferase and sulfurtransferase MOCS3 OS=Mus musculus GN=Mocs3 PE=1 S     | 1.9565217 | 1  | 1   | 1  | 49.344 | 7.49 |           | 300000    |           | 2.11    |
| P62484   | Abl interactor 2 OS=Mus musculus GN=Abi2 PE=1 SV=1                                  | 7.8475336 | 3  | 9   | 2  | 49.356 | 6.01 | 7400000   | 4700000   | 6100000   | 28.32   |
| Q6P2L7   | Protein CASC4 OS=Mus musculus GN=Casc4 PE=1 SV=1                                    | 2.7586207 | 1  | 1   | 1  | 49.379 | 5.45 | 490000    |           |           | 0.00    |
| P46467   | Vacuolar protein sorting-associated protein 4B OS=Mus musculus GN=Vps4b PE=1 SV=2   | 1.8018018 | 1  | 1   | 1  | 49.389 | 7.11 | 450000    |           |           | 1.94    |
| Q8BFR5   | Elongation factor Tu, mitochondrial OS=Mus musculus GN=Tufm PE=1 SV=1               | 20.132743 | 8  | 21  | 8  | 49.477 | 7.56 | 9900000   | 4100000   | 7900000   | 61.93   |
| Q8CE50   | Sorting nexin-30 OS=Mus musculus GN=Snx30 PE=1 SV=1                                 | 1.8306636 | 1  | 1   | 1  | 49.489 | 5.35 | 860000    |           |           | 2.39    |
| O88685   | 26S protease regulatory subunit 6A OS=Mus musculus GN=Psmc3 PE=1 SV=2               | 17.420814 | 5  | 12  | 5  | 49.518 | 5.19 | 4100000   | 1900000   | 1700000   | 36.94   |
| Q9D6F9   | Tubulin beta-4A chain OS=Mus musculus GN=Tubb4a PE=1 SV=3                           | 73.423423 | 25 | 276 | 6  | 49.554 | 4.88 | 49000000  | 43000000  | 60000000  | 834.01  |
| Q8CGA0   | Protein phosphatase 1F OS=Mus musculus GN=Ppm1f PE=1 SV=1                           | 5.3097345 | 2  | 2   | 2  | 49.58  | 5.3  |           |           |           | 4.85    |
| Q9R1T4   | Septin-6 OS=Mus musculus GN=Sept6 PE=1 SV=4                                         | 38.940092 | 13 | 46  | 6  | 49.588 | 6.43 | 16000000  | 12000000  | 24000000  | 146.46  |
| P84091   | AP-2 complex subunit mu OS=Mus musculus GN=Ap2m1 PE=1 SV=1                          | 28.735632 | 12 | 31  | 12 | 49.623 | 9.54 | 30000000  | 12000000  | 17000000  | 87.37   |
| P99024   | Tubulin beta-5 chain OS=Mus musculus GN=Tubb5 PE=1 SV=1                             | 73.423423 | 26 | 325 | 4  | 49.639 | 4.89 | 100000000 | 47000000  | 66000000  | 1000.62 |
| Q8C1B7   | Septin-11 OS=Mus musculus GN=Sept11 PE=1 SV=4                                       | 39.211137 | 16 | 51  | 7  | 49.663 | 6.68 | 31000000  | 22000000  | 37000000  | 144.62  |
| P36552   | Oxygen-dependent coproporphyrinogen-III oxidase, mitochondrial OS=Mus musculus GN=  | 3.3860045 | 1  | 1   | 1  | 49.683 | 8.53 |           |           |           | 2.72    |
| Q8R5M8   | Cell adhesion molecule 1 OS=Mus musculus GN=Cadm1 PE=1 SV=2                         | 19.95614  | 7  | 30  | 7  | 49.757 | 5.03 | 37000000  | 39000000  | 44000000  | 98.62   |
| Q99PL6   | UBX domain-containing protein 6 OS=Mus musculus GN=Ubxn6 PE=1 SV=1                  | 7.239819  | 2  | 3   | 2  | 49.765 | 8.54 | 720000    | 1100000   |           | 7.54    |
| Q8CHH9   | Septin-8 OS=Mus musculus GN=Sept8 PE=1 SV=4                                         | 33.566434 | 12 | 32  | 8  | 49.781 | 6    | 16000000  | 10000000  | 17000000  | 84.30   |
| Q7Z3Y8   | SWISS-PROT:Q7Z3Y8 Tax_Id=9606 Gene_Symbol=KRT27 Keratin, type I x                   | 12.636166 | 6  | 34  | 4  | 49.793 | 5.14 |           |           | 6200000   | 81.45   |
| P68372   | Tubulin beta-4B chain OS=Mus musculus GN=Tubb4b PE=1 SV=1                           | 73.258427 | 27 | 345 | 2  | 49.799 | 4.89 | 130000000 | 59000000  | 87000000  | 1055.84 |
| P03995   | Glial fibrillary acidic protein OS=Mus musculus GN=Gfap PE=1 SV=4                   | 26.27907  | 11 | 21  | 10 | 49.87  | 5.34 | 3100000   | 2500000   | 5000000   | 54.37   |
| Q7TMM9   | Tubulin beta-2A chain OS=Mus musculus GN=Tubb2a PE=1 SV=1                           | 75.280899 | 28 | 346 | 1  | 49.875 | 4.89 | 430000000 | 190000000 | 260000000 | 1066.30 |
| P68368   | Tubulin alpha-4A chain OS=Mus musculus GN=Tuba4a PE=1 SV=1                          | 58.928571 | 26 | 145 | 8  | 49.892 | 5.06 | 260000000 | 130000000 | 280000000 | 445.69  |
| Q07076   | Annexin A7 OS=Mus musculus GN=Anxa7 PE=1 SV=2                                       | 8.8552916 | 3  | 9   | 3  | 49.893 | 6.18 | 1600000   | 2400000   | 2000000   | 28.12   |
| Q9D0G0   | 28S ribosomal protein S30, mitochondrial OS=Mus musculus GN=Mrps30 PE=1 SV=1        | 2.7149321 | 1  | 1   | 1  | 49.908 | 9.38 | 560000    |           |           | 2.96    |
| Q9CWF2   | Tubulin beta-2B chain OS=Mus musculus GN=Tubb2b PE=1 SV=1                           | 75.280899 | 28 | 342 | 1  | 49.921 | 4.89 | 17000000  | 10000000  | 12000000  | 1055.47 |
| P01872   | Ig mu chain C region OS=Mus musculus GN=Ighm PE=1 SV=2                              | 3.5242291 | 1  | 3   | 1  | 49.94  | 7.01 | 1800000   | 1000000   | 1500000   | 11.87   |
| Q3UX10   | Tubulin alpha chain-like 3 OS=Mus musculus GN=Tubal3 PE=2 SV=2                      | 9.6412556 | 5  | 33  | 1  | 49.956 | 5.58 | 16000000  | 5400000   | 7200000   | 85.20   |
| Q9JJZ2   | Tubulin alpha-8 chain OS=Mus musculus GN=Tuba8 PE=1 SV=1                            | 35.18931  | 14 | 86  | 3  | 50.02  | 5.1  | 2800000   | 1200000   | 2100000   | 261.70  |
| Q9D8N0   | Elongation factor 1-gamma OS=Mus musculus GN=Eef1g PE=1 SV=3                        | 22.883295 | 10 | 38  | 10 | 50.029 | 6.74 | 32000000  | 9500000   | 18000000  | 115.57  |
| P10126   | Elongation factor 1-alpha 1 OS=Mus musculus GN=Eef1a1 PE=1 SV=3                     | 16.450216 | 8  | 29  | 3  | 50.082 | 9.01 | 13000000  | 6400000   | 15000000  | 71.91   |
| Q9Z219   | Succinate--CoA ligase [ADP-forming] subunit beta, mitochondrial OS=Mus musculus GN= | 28.941685 | 14 | 50  | 14 | 50.082 | 7.01 | 19000000  | 10000000  | 18000000  | 149.14  |
| P68369   | Tubulin alpha-1A chain OS=Mus musculus GN=Tuba1a PE=1 SV=1                          | 59.645233 | 27 | 175 | 8  | 50.104 | 5.06 | 1.1E+09   | 500000000 | 1.2E+09   | 517.60  |
| P60122   | RuvB-like 1 OS=Mus musculus GN=Ruvb1 PE=1 SV=1                                      | 9.4298246 | 3  | 6   | 3  | 50.182 | 6.42 | 1400000   | 1000000   | 1500000   | 17.10   |
| P50136   | 2-oxoisovalerate dehydrogenase subunit alpha, mitochondrial OS=Mus musculus GN=Bcl  | 3.3936652 | 1  | 1   | 1  | 50.339 | 8.06 |           | 6500000   |           | 2.55    |
| Q5FWK3   | Rho GTPase-activating protein 1 OS=Mus musculus GN=Arhgap1 PE=1 SV=1                | 8.8838269 | 3  | 5   | 3  | 50.379 | 6.44 | 3300000   |           | 2200000   | 15.78   |
| Q9ERD7   | Tubulin beta-3 chain OS=Mus musculus GN=Tubb3 PE=1 SV=1                             | 52.222222 | 22 | 219 | 7  | 50.386 | 4.93 | 78000000  | 42000000  | 73000000  | 709.11  |
| Q8BVY0   | Ribosomal L1 domain-containing protein 1 OS=Mus musculus GN=Rsl1d1 PE=1 SV=1        | 3.0973451 | 1  | 1   | 1  | 50.39  | 9.98 |           |           | 660000    | 2.37    |
| P62631   | Elongation factor 1-alpha 2 OS=Mus musculus GN=Eef1a2 PE=1 SV=1                     | 16.414687 | 8  | 32  | 3  | 50.422 | 9.03 | 22000000  | 7400000   | 13000000  | 84.34   |
| Q9QZ18   | Serine incorporator 1 OS=Mus musculus GN=Serinc1 PE=1 SV=1                          | 2.8697572 | 1  | 3   | 1  | 50.475 | 6.28 | 4800000   | 250000    |           | 7.66    |
| P50396   | Rab GDP dissociation inhibitor alpha OS=Mus musculus GN=Gdi1 PE=1 SV=3              | 46.756152 | 18 | 58  | 13 | 50.489 | 5.08 | 34000000  | 18000000  | 30000000  | 185.48  |
| Q6KB66-1 | SWISS-PROT:Q6KB66-1 Tax_Id=9606 Gene_Symbol=KRT80 Isoform 1 of x                    | 9.5132743 | 4  | 5   | 3  | 50.494 | 5.67 |           | 2000000   | 4100000   | 12.52   |
| Q61598   | Rab GDP dissociation inhibitor beta OS=Mus musculus GN=Gdi2 PE=1 SV=1               | 27.191011 | 11 | 32  | 6  | 50.505 | 6.25 | 6400000   | 3000000   | 5700000   | 95.27   |
| Q8K2F8   | Protein LSM14 homolog A OS=Mus musculus GN=Lsm14a PE=1 SV=1                         | 4.3290043 | 2  | 2   | 2  | 50.515 | 9.52 | 1100000   |           |           | 3.87    |
| O55131   | Septin-7 OS=Mus musculus GN=Sept7 PE=1 SV=1                                         | 34.633028 | 14 | 71  | 13 | 50.518 | 8.57 | 83000000  | 47000000  | 66000000  | 181.79  |

|        |                                                                                           |           |    |     |    |        |      |          |          |           |        |
|--------|-------------------------------------------------------------------------------------------|-----------|----|-----|----|--------|------|----------|----------|-----------|--------|
| Q9R0X4 | Acyl-coenzyme A thioesterase 9, mitochondrial OS=Mus musculus GN=Acot9 PE=1 SV=1          | 4.7835991 | 2  | 3   | 2  | 50.528 | 8.59 |          | 740000   | 900000    | 8.17   |
| Q9Z1J3 | Cysteine desulfurase, mitochondrial OS=Mus musculus GN=Nfs1 PE=1 SV=3                     | 5.2287582 | 2  | 4   | 2  | 50.538 | 8.16 | 130000   | 1100000  | 2600000   | 9.73   |
| Q61644 | Protein kinase C and casein kinase substrate in neurons protein 1 OS=Mus musculus GN      | 55.328798 | 21 | 91  | 21 | 50.544 | 5.24 | 91000000 | 68000000 | 120000000 | 274.17 |
| Q924S8 | Sprouty-related, EVH1 domain-containing protein 1 OS=Mus musculus GN=Spred1 PE=1          | 4.2792793 | 1  | 2   | 1  | 50.631 | 6.47 | 870000   |          | 890000    | 7.92   |
| Q9JJK2 | LanC-like protein 2 OS=Mus musculus GN=Lancl2 PE=1 SV=1                                   | 16.888889 | 6  | 19  | 6  | 50.745 | 7.28 | 5100000  | 1900000  | 3900000   | 57.92  |
| Q91Y70 | NADH dehydrogenase [ubiquinone] flavoprotein 1, mitochondrial OS=Mus musculus GN=         | 25.646552 | 10 | 28  | 10 | 50.802 | 8.21 | 23000000 | 11000000 | 18000000  | 79.45  |
| Q8C5H8 | NAD kinase 2, mitochondrial OS=Mus musculus GN=Nadk2 PE=1 SV=2                            | 5.9734513 | 2  | 3   | 2  | 50.827 | 8.07 | 540000   | 430000   |           | 9.16   |
| Q8C7D2 | Protein cereblon OS=Mus musculus GN=Crbn PE=1 SV=1                                        | 3.1460674 | 1  | 1   | 1  | 50.847 | 5.33 | 1600000  |          |           | 2.27   |
| Q91YP0 | L-2-hydroxyglutarate dehydrogenase, mitochondrial OS=Mus musculus GN=L2hgdh PE=1          | 4.9568966 | 2  | 4   | 2  | 50.866 | 8.29 | 1100000  | 1000000  | 1900000   | 12.76  |
| P54071 | Isocitrate dehydrogenase [NADP], mitochondrial OS=Mus musculus GN=Idh2 PE=1 SV=3          | 17.699115 | 7  | 12  | 7  | 50.874 | 8.69 | 4600000  | 1600000  | 2400000   | 33.81  |
| Q8R071 | Inositol-trisphosphate 3-kinase A OS=Mus musculus GN=Itpka PE=1 SV=1                      | 13.28976  | 5  | 13  | 5  | 50.903 | 7.72 | 6400000  | 3200000  | 4800000   | 39.47  |
| Q8C132 | BAG family molecular chaperone regulator 5 OS=Mus musculus GN=Bag5 PE=1 SV=1              | 10.290828 | 3  | 4   | 3  | 50.911 | 6.05 | 990000   |          | 1700000   | 13.31  |
| Q64378 | Peptidyl-prolyl cis-trans isomerase FKBP5 OS=Mus musculus GN=Fkbp5 PE=1 SV=1              | 3.0701754 | 1  | 2   | 1  | 50.934 | 7.8  | 510000   | 220000   |           | 4.91   |
| P61979 | Heterogeneous nuclear ribonucleoprotein K OS=Mus musculus GN=Hnrnpk PE=1 SV=1             | 29.157667 | 13 | 46  | 13 | 50.944 | 5.54 | 60000000 | 23000000 | 40000000  | 138.42 |
| O89053 | Coronin-1A OS=Mus musculus GN=Coro1a PE=1 SV=5                                            | 34.056399 | 14 | 37  | 14 | 50.957 | 6.48 | 32000000 | 16000000 | 37000000  | 91.89  |
| Q9R111 | Guanine deaminase OS=Mus musculus GN=Gda PE=1 SV=1                                        | 18.281938 | 7  | 16  | 7  | 50.981 | 5.53 | 13000000 | 7300000  | 13000000  | 43.15  |
| Q9Z0N1 | Eukaryotic translation initiation factor 2 subunit 3, X-linked OS=Mus musculus GN=Eif2s3; | 2.1186441 | 1  | 2   | 1  | 51.033 | 8.4  |          | 910000   | 1500000   | 4.81   |
| O35857 | Mitochondrial import inner membrane translocase subunit TIM44 OS=Mus musculus GN=         | 5.3097345 | 2  | 5   | 2  | 51.059 | 8.13 | 3000000  | 880000   | 1700000   | 15.35  |
| P83887 | Tubulin gamma-1 chain OS=Mus musculus GN=Tubg1 PE=1 SV=1                                  | 1.9955654 | 1  | 1   | 1  | 51.069 | 6.02 | 1700000  |          |           | 2.64   |
| Q9W7M5 | RuvB-like 2 OS=Mus musculus GN=Ruvbl2 PE=1 SV=3                                           | 12.311015 | 5  | 8   | 5  | 51.081 | 5.64 | 2200000  | 1800000  | 2000000   | 20.87  |
| P21956 | Lactadherin OS=Mus musculus GN=Mfge8 PE=1 SV=3                                            | 4.7516199 | 2  | 2   | 2  | 51.208 | 6.52 | 2500000  |          | 250000    | 4.89   |
| P08779 | SWISS-PROT:P08779 Tax_Id=9606 Gene_Symbol=KRT16 Keratin, type I c x                       | 43.340381 | 21 | 72  | 6  | 51.236 | 5.05 | 3400000  | 1300000  | 2900000   | 192.21 |
| Q99L43 | Phosphatidate cytidyltransferase 2 OS=Mus musculus GN=Cds2 PE=1 SV=1                      | 8.7837838 | 4  | 10  | 4  | 51.28  | 7.05 | 14000000 | 8400000  | 6600000   | 38.98  |
| P12657 | Muscarinic acetylcholine receptor M1 OS=Mus musculus GN=Chrm1 PE=1 SV=2                   | 6.0869565 | 2  | 4   | 2  | 51.345 | 9.32 | 1600000  | 560000   | 1700000   | 11.13  |
| Q99JY0 | Trifunctional enzyme subunit beta, mitochondrial OS=Mus musculus GN=Hadhb PE=1 SV         | 8.6315789 | 4  | 7   | 4  | 51.353 | 9.38 | 3800000  | 1600000  | 2600000   | 16.27  |
| Q8R1S0 | Ubiquinone biosynthesis monooxygenase COQ6, mitochondrial OS=Mus musculus GN=C            | 1.8907563 | 1  | 1   | 1  | 51.36  | 7.17 | 420000   |          |           | 2.36   |
| Q5SUF2 | Luc7-like protein 3 OS=Mus musculus GN=Luc7l3 PE=1 SV=1                                   | 6.712963  | 2  | 2   | 2  | 51.419 | 9.77 | 1200000  |          | 950000    | 7.03   |
| P40124 | Adenylyl cyclase-associated protein 1 OS=Mus musculus GN=Cap1 PE=1 SV=4                   | 37.974684 | 12 | 27  | 11 | 51.532 | 7.52 | 8600000  | 5600000  | 7800000   | 77.90  |
| P30416 | Peptidyl-prolyl cis-trans isomerase FKBP4 OS=Mus musculus GN=Fkbp4 PE=1 SV=5              | 10.262009 | 5  | 13  | 5  | 51.54  | 5.72 | 2900000  | 1800000  | 3000000   | 33.06  |
| P61202 | COP9 signalosome complex subunit 2 OS=Mus musculus GN=Cops2 PE=1 SV=1                     | 10.835214 | 4  | 8   | 4  | 51.564 | 5.53 | 2000000  | 940000   | 2600000   | 22.13  |
| P02533 | SWISS-PROT:P02533 Tax_Id=9606 Gene_Symbol=KRT14 Keratin, type I c x                       | 55.29661  | 27 | 111 | 5  | 51.589 | 5.16 | 20000000 | 7100000  | 51000000  | 317.71 |
| Q06890 | Clusterin OS=Mus musculus GN=Clu PE=1 SV=1                                                | 18.75     | 7  | 19  | 7  | 51.623 | 5.67 | 4200000  | 4300000  | 5300000   | 55.97  |
| Q2NL51 | Glycogen synthase kinase-3 alpha OS=Mus musculus GN=Gsk3a PE=1 SV=2                       | 4.8979592 | 2  | 2   | 1  | 51.628 | 8.81 | 1100000  |          |           | 5.46   |
| Q6P1F6 | Serine/threonine-protein phosphatase 2A 55 kDa regulatory subunit B alpha isoform OS=     | 13.199105 | 5  | 8   | 5  | 51.659 | 6.2  | 6300000  | 3100000  | 3700000   | 21.88  |
| O08842 | GDNF family receptor alpha-2 OS=Mus musculus GN=Gfra2 PE=1 SV=2                           | 4.9568966 | 2  | 4   | 2  | 51.693 | 7.75 | 4900000  | 4400000  | 5300000   | 8.12   |
| Q9CZU6 | Citrate synthase, mitochondrial OS=Mus musculus GN=Cs PE=1 SV=1                           | 22.198276 | 11 | 32  | 11 | 51.703 | 8.57 | 47000000 | 29000000 | 44000000  | 78.60  |
| P62812 | Gamma-aminobutyric acid receptor subunit alpha-1 OS=Mus musculus GN=Gabra1 PE=1           | 14.945055 | 6  | 16  | 6  | 51.721 | 9.31 | 8000000  | 3800000  | 7100000   | 40.08  |
| Q91YJ2 | Sorting nexin-4 OS=Mus musculus GN=Snx4 PE=1 SV=1                                         | 12.666667 | 5  | 9   | 5  | 51.745 | 5.8  | 1600000  | 1200000  | 1900000   | 26.83  |
| P26339 | Chromogranin-A OS=Mus musculus GN=Chga PE=1 SV=1                                          | 2.3758099 | 1  | 3   | 1  | 51.758 | 4.72 | 520000   | 540000   | 840000    | 9.91   |
| P97855 | Ras GTPase-activating protein-binding protein 1 OS=Mus musculus GN=G3bp1 PE=1 SV          | 6.0215054 | 2  | 2   | 2  | 51.797 | 5.59 |          | 360000   | 610000    | 5.59   |
| Q8C178 | Required for meiotic nuclear division protein 1 homolog OS=Mus musculus GN=Rmnd1 P        | 5.5555556 | 2  | 4   | 2  | 51.81  | 7.99 | 1400000  | 1300000  | 1900000   | 13.64  |
| Q8BXZ1 | Protein disulfide-isomerase TMX3 OS=Mus musculus GN=Tmx3 PE=1 SV=2                        | 8.7719298 | 3  | 8   | 3  | 51.815 | 5.16 | 4200000  | 2500000  | 4200000   | 28.34  |
| Q8BGH2 | Sorting and assembly machinery component 50 homolog OS=Mus musculus GN=Samm5              | 18.123667 | 8  | 14  | 8  | 51.831 | 6.8  | 4600000  | 2900000  | 2600000   | 28.25  |
| A2RT62 | F-box/LRR-repeat protein 16 OS=Mus musculus GN=Fbxl16 PE=1 SV=1                           | 5.2192067 | 2  | 2   | 2  | 51.845 | 6.6  | 2400000  |          | 2500000   | 6.32   |
| Q7TNR6 | Immunoglobulin superfamily member 21 OS=Mus musculus GN=Igsf21 PE=2 SV=1                  | 4.7008547 | 2  | 2   | 2  | 51.905 | 6.95 |          | 2000000  |           | 4.94   |
| Q9CQU1 | Microfibrillar-associated protein 1 OS=Mus musculus GN=Mfap1 PE=1 SV=1                    | 4.1002278 | 1  | 2   | 1  | 51.923 | 4.98 | 1400000  |          | 1500000   | 5.60   |
| Q62376 | U1 small nuclear ribonucleoprotein 70 kDa OS=Mus musculus GN=Snrnp70 PE=1 SV=2            | 13.392857 | 6  | 10  | 6  | 51.961 | 9.94 | 8600000  |          | 5400000   | 29.60  |
| Q8BTY2 | Cleavage and polyadenylation specificity factor subunit 7 OS=Mus musculus GN=Cpsf7 F      | 4.0339703 | 1  | 2   | 1  | 51.979 | 8    | 2600000  |          | 2600000   | 7.17   |

|        |                                                                                        |           |    |    |    |        |      |          |          |          |        |
|--------|----------------------------------------------------------------------------------------|-----------|----|----|----|--------|------|----------|----------|----------|--------|
| Q5Y4Y6 | Gasdermin-A3 OS=Mus musculus GN=Gsdma3 PE=1 SV=1                                       | 2.8017241 | 1  | 1  | 1  | 51.987 | 5.71 |          |          | 1000000  | 2.37   |
| Q3UJU9 | Regulator of microtubule dynamics protein 3 OS=Mus musculus GN=Rmdn3 PE=1 SV=2         | 15.744681 | 5  | 16 | 5  | 51.997 | 5.21 | 4400000  | 1200000  | 2900000  | 47.13  |
| Q3UYG8 | O-acetyl-ADP-ribose deacetylase MACROD2 OS=Mus musculus GN=Macro2 PE=1 SV=             | 3.1578947 | 1  | 3  | 1  | 52.112 | 4.75 | 1200000  | 450000   | 1200000  | 11.09  |
| Q9Z2W0 | Aspartyl aminopeptidase OS=Mus musculus GN=Dnpep PE=1 SV=2                             | 2.5369979 | 1  | 1  | 1  | 52.174 | 7.25 |          |          | 1300000  | 2.66   |
| P60229 | Eukaryotic translation initiation factor 3 subunit E OS=Mus musculus GN=Elf3e PE=1 SV= | 4.7191011 | 2  | 5  | 2  | 52.187 | 6.04 | 2100000  | 2700000  | 3900000  | 12.73  |
| P70290 | 55 kDa erythrocyte membrane protein OS=Mus musculus GN=Mpp1 PE=1 SV=1                  | 2.360515  | 1  | 1  | 1  | 52.194 | 7.2  |          |          | 700000   | 2.37   |
| Q99J85 | Neuronal pentraxin receptor OS=Mus musculus GN=Nptxr PE=1 SV=1                         | 7.7079108 | 3  | 7  | 3  | 52.252 | 6.13 | 2300000  | 1600000  | 2700000  | 16.68  |
| Q8CBW3 | Abl interactor 1 OS=Mus musculus GN=Abi1 PE=1 SV=3                                     | 9.3555094 | 4  | 9  | 3  | 52.255 | 7.64 | 3900000  | 2000000  | 3600000  | 28.36  |
| Q9Z2D6 | Methyl-CpG-binding protein 2 OS=Mus musculus GN=Mecp2 PE=1 SV=1                        | 24.380165 | 8  | 21 | 8  | 52.275 | 9.96 | 9600000  | 450000   | 6100000  | 72.37  |
| Q99M87 | DnaJ homolog subfamily A member 3, mitochondrial OS=Mus musculus GN=Dnaja3 PE=         | 11.666667 | 4  | 7  | 4  | 52.41  | 9.22 | 4600000  | 1200000  | 2200000  | 17.48  |
| Q6GQS1 | Calcium-binding mitochondrial carrier protein SCaMC-3 OS=Mus musculus GN=Slc25a23      | 5.9957173 | 3  | 8  | 2  | 52.464 | 7.59 | 3600000  | 1900000  | 1400000  | 17.71  |
| Q8R016 | Bleomycin hydrolase OS=Mus musculus GN=Blmh PE=1 SV=1                                  | 2.8571429 | 1  | 1  | 1  | 52.477 | 6.48 |          |          | 5000000  | 3.11   |
| Q9CT10 | Ran-binding protein 3 OS=Mus musculus GN=Ranbp3 PE=1 SV=2                              | 6.3136456 | 2  | 5  | 2  | 52.541 | 5.12 | 500000   |          | 620000   | 19.89  |
| Q9DB72 | BTB/POZ domain-containing protein 17 OS=Mus musculus GN=Btbd17 PE=1 SV=1               | 3.9748954 | 1  | 2  | 1  | 52.569 | 9.42 |          | 860000   | 850000   | 7.51   |
| A2ASZ8 | Calcium-binding mitochondrial carrier protein SCaMC-2 OS=Mus musculus GN=Slc25a25      | 5.54371   | 3  | 6  | 2  | 52.587 | 8.54 | 2300000  | 1000000  | 1800000  | 11.93  |
| Q91WD5 | NADH dehydrogenase [ubiquinone] iron-sulfur protein 2, mitochondrial OS=Mus musculus   | 16.846652 | 7  | 21 | 7  | 52.592 | 6.99 | 14000000 | 8800000  | 9900000  | 58.48  |
| P08414 | Calcium/calmodulin-dependent protein kinase type IV OS=Mus musculus GN=Camk4 PE=       | 3.4115139 | 1  | 5  | 1  | 52.594 | 4.93 | 520000   | 200000   | 680000   | 16.87  |
| Q99JR5 | Tubulointerstitial nephritis antigen-like OS=Mus musculus GN=Tinagl1 PE=1 SV=1         | 6.6523605 | 2  | 2  | 2  | 52.63  | 6.77 | 6600000  |          | 1400000  | 4.55   |
| P56959 | RNA-binding protein FUS OS=Mus musculus GN=Fus PE=1 SV=1                               | 4.4401544 | 2  | 4  | 2  | 52.642 | 9.36 | 22000000 | 4600000  | 13000000 | 11.88  |
| Q99JG2 | Prosaposin receptor GPR37L1 OS=Mus musculus GN=Gpr371 PE=1 SV=2                        | 1.6632017 | 1  | 1  | 1  | 52.694 | 7.36 | 5900000  |          |          | 2.06   |
| Q9D1A2 | Cytosolic non-specific dipeptidase OS=Mus musculus GN=Cndp2 PE=1 SV=1                  | 2.5263158 | 1  | 2  | 1  | 52.734 | 5.66 |          | 550000   | 710000   | 4.39   |
| P47746 | Cannabinoid receptor 1 OS=Mus musculus GN=Cnr1 PE=1 SV=1                               | 1.9027484 | 1  | 1  | 1  | 52.796 | 8.27 | 1300000  |          |          | 1.96   |
| Q9CZ13 | Cytochrome b-c1 complex subunit 1, mitochondrial OS=Mus musculus GN=Uqcrc1 PE=1        | 49.166667 | 21 | 64 | 21 | 52.819 | 6.21 | 75000000 | 50000000 | 88000000 | 206.48 |
| Q9CYT6 | Adenylyl cyclase-associated protein 2 OS=Mus musculus GN=Cap2 PE=1 SV=1                | 27.10084  | 11 | 33 | 10 | 52.829 | 6.43 | 7900000  | 5100000  | 9800000  | 100.68 |
| Q9D8W5 | 26S proteasome non-ATPase regulatory subunit 12 OS=Mus musculus GN=Psm12 PE=           | 12.280702 | 4  | 10 | 4  | 52.861 | 7.06 | 5000000  | 2500000  | 4000000  | 31.70  |
| O08663 | Methionine aminopeptidase 2 OS=Mus musculus GN=Metap2 PE=1 SV=1                        | 6.9037657 | 3  | 3  | 3  | 52.888 | 5.82 | 1700000  |          | 2200000  | 9.68   |
| D3YZP9 | Coiled-coil domain-containing protein 6 OS=Mus musculus GN=Ccdc6 PE=1 SV=1             | 2.3454158 | 1  | 1  | 1  | 52.906 | 7.34 |          |          | 1900000  | 2.76   |
| O35495 | Cyclin-dependent kinase 14 OS=Mus musculus GN=Cdk14 PE=1 SV=2                          | 2.771855  | 1  | 1  | 1  | 52.962 | 8.92 | 1300000  |          |          | 2.59   |
| Q9D394 | Protein RUFY3 OS=Mus musculus GN=Rufy3 PE=1 SV=1                                       | 17.697228 | 6  | 10 | 6  | 52.973 | 5.49 | 4000000  | 1900000  | 2200000  | 29.50  |
| Q8CBY8 | Dynactin subunit 4 OS=Mus musculus GN=Dctn4 PE=1 SV=1                                  | 2.1413276 | 1  | 1  | 1  | 53.023 | 7.72 | 730000   |          |          | 1.90   |
| Q8C5Q4 | G-rich sequence factor 1 OS=Mus musculus GN=Grsf1 PE=1 SV=2                            | 2.5052192 | 1  | 1  | 1  | 53.043 | 6.67 |          |          | 790000   | 2.20   |
| Q9WUM4 | Coronin-1C OS=Mus musculus GN=Coro1c PE=1 SV=2                                         | 13.50211  | 6  | 16 | 6  | 53.087 | 7.08 | 7500000  | 2600000  | 6800000  | 46.52  |
| Q9JI44 | DNA methyltransferase 1-associated protein 1 OS=Mus musculus GN=Dmap1 PE=1 SV=         | 4.0598291 | 1  | 2  | 1  | 53.097 | 9.5  | 1100000  |          | 280000   | 5.60   |
| Q9DCD0 | 6-phosphogluconate dehydrogenase, decarboxylating OS=Mus musculus GN=Pgd PE=1          | 3.5196687 | 1  | 2  | 1  | 53.213 | 7.23 |          | 580000   | 1900000  | 7.06   |
| P53395 | Lipoamide acyltransferase component of branched-chain alpha-keto acid dehydrogenase    | 3.7344398 | 2  | 4  | 2  | 53.213 | 8.6  | 2300000  | 10000000 | 1900000  | 10.80  |
| Q63850 | Nuclear pore glycoprotein p62 OS=Mus musculus GN=Nup62 PE=1 SV=2                       | 2.661597  | 1  | 2  | 1  | 53.222 | 5.31 | 780000   |          | 620000   | 5.71   |
| Q00493 | Carboxypeptidase E OS=Mus musculus GN=Cpe PE=1 SV=2                                    | 9.0336134 | 4  | 6  | 4  | 53.222 | 5.19 | 2100000  | 3000000  | 1600000  | 16.70  |
| P53986 | Monocarboxylate transporter 1 OS=Mus musculus GN=Slc16a1 PE=1 SV=1                     | 6.693712  | 2  | 4  | 2  | 53.232 | 7.47 | 5700000  | 1600000  | 4400000  | 12.93  |
| Q9D0L8 | mRNA cap guanine-N7 methyltransferase OS=Mus musculus GN=Rnmt PE=1 SV=1                | 4.0860215 | 2  | 4  | 2  | 53.258 | 6.48 | 1600000  | 280000   | 1400000  | 8.57   |
| Q920M7 | Synaptotagmin-17 OS=Mus musculus GN=Syt17 PE=1 SV=1                                    | 6.8085106 | 2  | 3  | 2  | 53.26  | 7.15 | 890000   | 270000   |          | 8.55   |
| Q9R0M4 | Podocalyxin OS=Mus musculus GN=Podxl PE=1 SV=2                                         | 2.9821074 | 1  | 2  | 1  | 53.356 | 4.97 | 950000   |          | 800000   | 5.15   |
| Q02819 | Nucleobindin-1 OS=Mus musculus GN=Nucb1 PE=1 SV=2                                      | 10.239651 | 4  | 7  | 4  | 53.376 | 5.07 | 1600000  | 1200000  | 2400000  | 17.48  |
| Q99LD4 | COP9 signalosome complex subunit 1 OS=Mus musculus GN=Gps1 PE=1 SV=1                   | 9.7664544 | 4  | 7  | 4  | 53.408 | 6.84 | 2600000  | 990000   | 2700000  | 19.80  |
| P32037 | Solute carrier family 2, facilitated glucose transporter member 3 OS=Mus musculus GN=S | 10.141988 | 5  | 18 | 5  | 53.444 | 4.98 | 13000000 | 2700000  | 7000000  | 61.81  |
| Q9JLJ2 | 4-trimethylaminobutyraldehyde dehydrogenase OS=Mus musculus GN=Aldh9a1 PE=1 SV=        | 3.8461538 | 1  | 1  | 1  | 53.48  | 6.98 | 1400000  |          |          | 3.10   |
| P26369 | Splicing factor U2AF 65 kDa subunit OS=Mus musculus GN=U2af2 PE=1 SV=3                 | 7.7894737 | 3  | 4  | 3  | 53.483 | 9.09 | 2300000  |          | 1400000  | 7.80   |
| Q91V09 | WD repeat-containing protein 13 OS=Mus musculus GN=Wdr13 PE=1 SV=1                     | 4.3298969 | 1  | 1  | 1  | 53.63  | 9.14 |          |          |          | 3.69   |
| Q61234 | Alpha-1-syntrophin OS=Mus musculus GN=Snta1 PE=1 SV=1                                  | 1.3916501 | 1  | 1  | 1  | 53.632 | 6.86 | 1200000  |          |          | 2.03   |

|        |                                                                                                                        |      |           |    |    |    |        |      |          |          |           |        |
|--------|------------------------------------------------------------------------------------------------------------------------|------|-----------|----|----|----|--------|------|----------|----------|-----------|--------|
| P20152 | Vimentin OS=Mus musculus GN=Vim PE=1 SV=3                                                                              |      | 31.759657 | 14 | 31 | 13 | 53.655 | 5.12 | 4400000  | 7000000  | 16000000  | 87.49  |
| P28658 | Ataxin-10 OS=Mus musculus GN=Atxn10 PE=1 SV=2                                                                          |      | 7.1578947 | 3  | 5  | 3  | 53.673 | 5.25 | 1500000  | 890000   | 2100000   | 16.79  |
| Q80U23 | Syntaphilin OS=Mus musculus GN=Snph PE=1 SV=3                                                                          |      | 9.8989899 | 3  | 6  | 3  | 53.72  | 5.9  | 1300000  |          | 2200000   | 18.35  |
| Q64735 | Complement component receptor 1-like protein OS=Mus musculus GN=Cr1l PE=1 SV=1                                         |      | 2.2774327 | 1  | 2  | 1  | 53.728 | 6.65 | 1000000  | 570000   |           | 4.95   |
| Q9WUM3 | Coronin-1B OS=Mus musculus GN=Coro1b PE=1 SV=1                                                                         |      | 14.46281  | 6  | 16 | 6  | 53.878 | 5.78 | 3700000  | 2800000  | 5800000   | 53.16  |
| P47740 | Fatty aldehyde dehydrogenase OS=Mus musculus GN=Aldh3a2 PE=1 SV=2                                                      |      | 5.5785124 | 2  | 5  | 2  | 53.936 | 8.35 | 3600000  | 1200000  | 2100000   | 16.23  |
| P17809 | Solute carrier family 2, facilitated glucose transporter member 1 OS=Mus musculus GN=Slc2a1 PE=1 SV=1                  |      | 5.0813008 | 2  | 5  | 2  | 53.949 | 8.87 | 21000000 | 6100000  | 3800000   | 16.33  |
| Q8BKZ9 | Pyruvate dehydrogenase protein X component, mitochondrial OS=Mus musculus GN=Pdhx1 PE=1 SV=1                           |      | 11.576846 | 4  | 15 | 4  | 53.965 | 7.75 | 5600000  | 4100000  | 6300000   | 46.19  |
| O35114 | Lysosome membrane protein 2 OS=Mus musculus GN=Scarb2 PE=1 SV=3                                                        |      | 5.0209205 | 2  | 4  | 2  | 54.009 | 5.1  | 2000000  | 1700000  | 1700000   | 10.30  |
| Q8BH43 | Wiskott-Aldrich syndrome protein family member 2 OS=Mus musculus GN=Wasf2 PE=1 SV=1                                    |      | 2.6156942 | 1  | 1  | 1  | 54.04  | 5.53 |          |          |           | 2.70   |
| P97384 | Annexin A11 OS=Mus musculus GN=Anxa11 PE=1 SV=2                                                                        |      | 2.1868787 | 1  | 1  | 1  | 54.045 | 7.66 |          | 780000   |           | 2.55   |
| P97379 | Ras GTPase-activating protein-binding protein 2 OS=Mus musculus GN=G3bp2 PE=1 SV=1                                     |      | 12.655602 | 4  | 5  | 4  | 54.055 | 5.62 | 2800000  |          | 2000000   | 14.64  |
| P11798 | Calcium/calmodulin-dependent protein kinase type II subunit alpha OS=Mus musculus GN=Cdk2 PE=1 SV=1                    |      | 43.305439 | 18 | 80 | 14 | 54.081 | 7.08 | 25000000 | 73000000 | 270000000 | 252.20 |
| P63080 | Gamma-aminobutyric acid receptor subunit beta-3 OS=Mus musculus GN=Gabbr3 PE=2                                         |      | 8.4566596 | 3  | 7  | 2  | 54.131 | 9.1  | 3600000  | 1200000  | 3500000   | 22.79  |
| P54823 | Probable ATP-dependent RNA helicase DDX6 OS=Mus musculus GN=Ddx6 PE=1 SV=1                                             |      | 4.3478261 | 2  | 2  | 2  | 54.157 | 8.66 | 520000   |          | 880000    | 4.58   |
| Q6PDL0 | Cytoplasmic dynein 1 light intermediate chain 2 OS=Mus musculus GN=Dync1li2 PE=1 SV=1                                  |      | 16.869919 | 6  | 15 | 6  | 54.185 | 6.28 | 3600000  | 2100000  | 4000000   | 43.62  |
| Q9Z0H4 | CUGBP Elav-like family member 2 OS=Mus musculus GN=Celf2 PE=1 SV=1                                                     |      | 6.1023622 | 2  | 2  | 2  | 54.236 | 8.76 |          | 380000   | 1900000   | 5.22   |
| O08749 | Dihydrolipoyl dehydrogenase, mitochondrial OS=Mus musculus GN=Dld PE=1 SV=2                                            |      | 17.288802 | 7  | 20 | 7  | 54.238 | 7.9  | 18000000 | 16000000 | 22000000  | 61.55  |
| Q91YD9 | Neural Wiskott-Aldrich syndrome protein OS=Mus musculus GN=Wasl PE=1 SV=1                                              |      | 8.9820359 | 4  | 6  | 4  | 54.24  | 7.93 | 2800000  | 660000   | 1700000   | 14.11  |
| O55026 | Ectonucleoside triphosphate diphosphohydrolase 2 OS=Mus musculus GN=Entpd2 PE=1 SV=1                                   |      | 4.8484848 | 2  | 4  | 2  | 54.285 | 8.37 | 2000000  | 830000   | 1300000   | 9.09   |
| O88746 | Target of Myb protein 1 OS=Mus musculus GN=Tom1 PE=1 SV=1                                                              |      | 2.6422764 | 1  | 3  | 1  | 54.291 | 4.94 | 980000   | 670000   | 940000    | 8.33   |
| Q8VCX5 | Calcium uptake protein 1, mitochondrial OS=Mus musculus GN=Micu1 PE=1 SV=1                                             |      | 2.7253669 | 1  | 3  | 1  | 54.318 | 8.59 | 3800000  | 1600000  | 2500000   | 10.61  |
| P97807 | Fumarate hydratase, mitochondrial OS=Mus musculus GN=Fh PE=1 SV=3                                                      |      | 12.426036 | 6  | 15 | 6  | 54.322 | 9.04 | 13000000 | 2800000  | 9700000   | 47.70  |
| P32921 | Tryptophan--tRNA ligase, cytoplasmic OS=Mus musculus GN=Wars PE=1 SV=2                                                 |      | 8.5239085 | 3  | 6  | 3  | 54.323 | 6.89 | 2700000  | 1100000  | 2900000   | 18.19  |
| O35405 | Phospholipase D3 OS=Mus musculus GN=Pld3 PE=1 SV=1                                                                     |      | 4.3032787 | 2  | 4  | 2  | 54.354 | 6.52 | 4600000  | 3400000  | 2700000   | 10.28  |
| Q61553 | Fascin OS=Mus musculus GN=Fscn1 PE=1 SV=4                                                                              |      | 6.4908722 | 3  | 4  | 3  | 54.474 | 6.89 | 1000000  | 680000   | 450000    | 9.19   |
| Q9Z2H2 | Regulator of G-protein signaling 6 OS=Mus musculus GN=Rgs6 PE=1 SV=2                                                   |      | 18.432203 | 6  | 13 | 4  | 54.497 | 7.42 | 3000000  | 1100000  | 2600000   | 37.31  |
| Q99K48 | Non-POU domain-containing octamer-binding protein OS=Mus musculus GN=Nono PE=1 SV=1                                    |      | 14.376321 | 7  | 26 | 7  | 54.506 | 8.95 | 8800000  | 1700000  | 3900000   | 71.16  |
| P54285 | Voltage-dependent L-type calcium channel subunit beta-3 OS=Mus musculus GN=Cacnb3 PE=1 SV=1                            |      | 14.46281  | 6  | 10 | 3  | 54.538 | 6.27 | 4300000  | 980000   | 4800000   | 27.31  |
| Q8CHY7 | Tetrapeptide repeat protein 23 OS=Mus musculus GN=Ttc23 PE=2 SV=1                                                      |      | 1.6393443 | 1  | 3  | 1  | 54.574 | 7.75 |          | 430000   | 980000    | 7.08   |
| Q61151 | Serine/threonine-protein phosphatase 2A 56 kDa regulatory subunit epsilon isoform OS=Mus musculus GN=Ppp2r2c PE=1 SV=1 |      | 5.5674518 | 2  | 4  | 2  | 54.679 | 6.95 | 6400000  | 1800000  | 3100000   | 10.51  |
| Q60738 | Zinc transporter 1 OS=Mus musculus GN=Slc30a1 PE=1 SV=1                                                                |      | 2.1868787 | 1  | 1  | 1  | 54.681 | 6.62 | 800000   |          |           | 2.66   |
| Q80W54 | CAAX prenyl protease 1 homolog OS=Mus musculus GN=Zmpste24 PE=1 SV=2                                                   |      | 3.3684211 | 1  | 1  | 1  | 54.699 | 6.95 | 1300000  |          |           | 3.13   |
| Q8K0E8 | Fibrinogen beta chain OS=Mus musculus GN=Fgb PE=1 SV=1                                                                 |      | 6.029106  | 2  | 4  | 2  | 54.718 | 7.08 | 1900000  | 850000   | 1600000   | 12.23  |
| O54829 | Regulator of G-protein signaling 7 OS=Mus musculus GN=Rgs7 PE=1 SV=2                                                   |      | 16.84435  | 8  | 20 | 6  | 54.758 | 8.13 | 16000000 | 4800000  | 6300000   | 50.67  |
| Q3UHL1 | CaM kinase-like vesicle-associated protein OS=Mus musculus GN=Camkv PE=1 SV=2                                          |      | 49.414063 | 17 | 55 | 17 | 54.785 | 5.54 | 31000000 | 11000000 | 24000000  | 189.21 |
| Q8BN59 | La-related protein 6 OS=Mus musculus GN=Larp6 PE=1 SV=1                                                                |      | 2.8455285 | 1  | 1  | 1  | 54.839 | 7.9  | 410000   |          |           | 2.01   |
| P63056 | Noelin-3 OS=Mus musculus GN=Olfn3 PE=1 SV=1                                                                            |      | 3.1380753 | 1  | 1  | 1  | 54.851 | 8.15 |          |          | 360000    | 2.91   |
| Q8VEH8 | Endoplasmic reticulum lectin 1 OS=Mus musculus GN=Erlec1 PE=1 SV=1                                                     |      | 6.8322981 | 3  | 7  | 3  | 54.871 | 6.25 | 1600000  | 1200000  | 1700000   | 18.63  |
| Q8BH44 | Coronin-2B OS=Mus musculus GN=Coro2b PE=1 SV=2                                                                         |      | 3.5416667 | 2  | 5  | 2  | 54.901 | 8.27 | 5500000  | 2000000  | 5300000   | 13.20  |
| P28661 | Septin-4 OS=Mus musculus GN=Sept4 PE=1 SV=1                                                                            |      | 14.435146 | 5  | 20 | 4  | 54.901 | 5.87 | 2700000  | 3500000  | 7500000   | 56.88  |
| Q8CHX7 | Raftlin-2 OS=Mus musculus GN=Rftn2 PE=1 SV=3                                                                           | 10.4 |           | 3  | 4  | 3  | 54.937 | 5.5  | 950000   |          | 1100000   | 11.66  |
| Q8CBE3 | WD repeat-containing protein 37 OS=Mus musculus GN=Wdr37 PE=1 SV=1                                                     |      | 15.120968 | 6  | 11 | 6  | 55.012 | 7.23 | 7100000  | 950000   | 4400000   | 33.11  |
| Q63943 | Myocyte-specific enhancer factor 2D OS=Mus musculus GN=Mef2d PE=1 SV=2                                                 |      | 2.1400778 | 1  | 4  | 1  | 55.031 | 7.88 | 3300000  |          | 2200000   | 10.01  |
| P22723 | Gamma-aminobutyric acid receptor subunit gamma-2 OS=Mus musculus GN=Gabrg2 PE=1 SV=1                                   |      | 1.6877637 | 1  | 2  | 1  | 55.063 | 8.66 | 4900000  | 1700000  |           | 4.39   |
| Q8K0T4 | Katanin p60 ATPase-containing subunit A-like 1 OS=Mus musculus GN=Katnal1 PE=1 SV=1                                    |      | 4.3032787 | 2  | 3  | 2  | 55.13  | 7.09 | 1500000  |          | 1300000   | 6.34   |
| Q8VH16 | Wiskott-Aldrich syndrome protein family member 3 OS=Mus musculus GN=Wasf3 PE=1 SV=1                                    |      | 4.99002   | 2  | 4  | 2  | 55.17  | 6.37 | 9500000  | 2600000  | 5800000   | 10.12  |
| Q9DC63 | F-box only protein 3 OS=Mus musculus GN=Fbxo3 PE=1 SV=1                                                                |      | 2.7083333 | 1  | 1  | 1  | 55.192 | 5.02 |          |          | 110000    | 2.06   |

|          |                                                                                      |           |    |     |    |        |      |           |           |           |        |
|----------|--------------------------------------------------------------------------------------|-----------|----|-----|----|--------|------|-----------|-----------|-----------|--------|
| Q99KP6   | Pre-mRNA-processing factor 19 OS=Mus musculus GN=Prpf19 PE=1 SV=1                    | 13.492063 | 5  | 10  | 5  | 55.204 | 6.61 | 3600000   | 1600000   | 4700000   | 27.80  |
| Q99LF4   | tRNA-splicing ligase RtcB homolog OS=Mus musculus GN=Rtcb PE=1 SV=1                  | 14.455446 | 6  | 16  | 6  | 55.214 | 7.23 | 9000000   | 2700000   | 6500000   | 45.21  |
| Q8QZV4   | Serine/threonine-protein kinase 32C OS=Mus musculus GN=Stk32c PE=1 SV=1              | 2.4590164 | 1  | 1   | 1  | 55.227 | 6.16 | 1400000   |           |           | 3.30   |
| Q8C522   | Endonuclease domain-containing 1 protein OS=Mus musculus GN=Endod1 PE=1 SV=2         | 2.5948104 | 1  | 3   | 1  | 55.227 | 6.16 | 5600000   | 1600000   | 3700000   | 10.38  |
| P70288   | Histone deacetylase 2 OS=Mus musculus GN=Hdac2 PE=1 SV=1                             | 2.4590164 | 1  | 2   | 1  | 55.267 | 5.91 | 4300000   |           | 3000000   | 6.12   |
| Q6P6M7   | O-phosphoseryl-tRNA(Sec) selenium transferase OS=Mus musculus GN=Sepsecs PE=1        | 1.3888889 | 1  | 1   | 1  | 55.29  | 8.06 | 27000000  |           |           | 2.21   |
| P46660   | Alpha-interneurin OS=Mus musculus GN=Ina PE=1 SV=3                                   | 46.307385 | 26 | 77  | 22 | 55.349 | 5.4  | 21000000  | 20000000  | 47000000  | 219.84 |
| O88998   | Noelin OS=Mus musculus GN=Olfm1 PE=1 SV=1                                            | 10.103093 | 4  | 8   | 4  | 55.363 | 6.95 | 5100000   | 2100000   | 5700000   | 25.23  |
| Q9WTR6   | Cystine/glutamate transporter OS=Mus musculus GN=Slc7a11 PE=1 SV=1                   | 2.7888446 | 1  | 1   | 1  | 55.42  | 9.23 | 69000     |           |           | 1.83   |
| Q8C1Y8   | Vacuolar fusion protein CCZ1 homolog OS=Mus musculus GN=Ccz1 PE=1 SV=1               | 2.7083333 | 1  | 1   | 1  | 55.469 | 6.02 |           | 970000    |           | 2.28   |
| Q7TPM6   | Fibronectin type III and SPRY domain-containing protein 1 OS=Mus musculus GN=Fsd1 F  | 6.6532258 | 3  | 5   | 3  | 55.49  | 6.67 | 450000    |           | 550000    | 9.16   |
| Q9DPC2   | Sodium-coupled neutral amino acid transporter 3 OS=Mus musculus GN=Slc38a3 PE=1 S    | 1.5841584 | 1  | 1   | 1  | 55.555 | 7.09 |           |           | 3400000   | 2.31   |
| Q5SRX1   | TOM1-like protein 2 OS=Mus musculus GN=Tom1l2 PE=1 SV=1                              | 12.820513 | 5  | 11  | 5  | 55.628 | 4.82 | 4500000   | 3400000   | 5800000   | 29.62  |
| P14576   | Signal recognition particle 54 kDa protein OS=Mus musculus GN=Srp54 PE=1 SV=2        | 4.1666667 | 2  | 4   | 2  | 55.684 | 8.75 | 1400000   |           | 500000    | 9.51   |
| P24547   | Inosine-5'-monophosphate dehydrogenase 2 OS=Mus musculus GN=Impdh2 PE=1 SV=2         | 2.3346304 | 1  | 1   | 1  | 55.78  | 7.28 | 1200000   |           |           | 3.12   |
| Q9WVE8   | Protein kinase C and casein kinase substrate in neurons protein 2 OS=Mus musculus GN | 15.020576 | 8  | 15  | 8  | 55.798 | 5.2  | 5400000   | 4400000   | 7200000   | 32.55  |
| Q8VBY2   | Calcium/calmodulin-dependent protein kinase kinase 1 OS=Mus musculus GN=Camkk1 F     | 7.9207921 | 3  | 5   | 3  | 55.802 | 5.99 | 1100000   |           | 1800000   | 15.04  |
| Q9D024   | Coiled-coil domain-containing protein 47 OS=Mus musculus GN=Ccdc47 PE=1 SV=2         | 5.5900621 | 2  | 5   | 2  | 55.808 | 4.84 | 1800000   | 1200000   | 2100000   | 14.25  |
| Q8BVE3   | V-type proton ATPase subunit H OS=Mus musculus GN=Atp6v1h PE=1 SV=1                  | 28.15735  | 11 | 35  | 11 | 55.819 | 6.61 | 16000000  | 9500000   | 18000000  | 111.15 |
| Q9Z127   | Large neutral amino acids transporter small subunit 1 OS=Mus musculus GN=Slc7a5 PE=  | 8.3984375 | 4  | 8   | 4  | 55.836 | 7.9  | 2900000   | 1200000   | 1700000   | 26.61  |
| Q14CN4-1 | SWISS-PROT:Q14CN4-1 Tax_Id=9606 Gene_Symbol=KRT72 Isoform 1 of x                     | 9.1976517 | 5  | 20  | 1  | 55.842 | 6.89 | 11000000  | 6800000   | 13000000  | 50.29  |
| Q8BWF0   | Succinate-semialdehyde dehydrogenase, mitochondrial OS=Mus musculus GN=Aldh5a1       | 15.678776 | 7  | 17  | 7  | 55.933 | 8.25 | 13000000  | 5800000   | 10000000  | 53.58  |
| Q8BJY1   | 26S proteasome non-ATPase regulatory subunit 5 OS=Mus musculus GN=Psm5d PE=1 S       | 1.984127  | 1  | 2   | 1  | 55.937 | 5.21 | 910000    |           |           | 5.87   |
| Q8VE97   | Serine/arginine-rich splicing factor 4 OS=Mus musculus GN=Srsf4 PE=2 SV=1            | 16.973415 | 8  | 14  | 5  | 55.947 | 11.4 | 7600000   |           | 5500000   | 38.90  |
| Q9D0K2   | Succinyl-CoA:3-ketoacid coenzyme A transferase 1, mitochondrial OS=Mus musculus GN   | 14.615385 | 7  | 27  | 7  | 55.953 | 8.53 | 18000000  | 7300000   | 13000000  | 71.09  |
| Q9JMA1   | Ubiquitin carboxyl-terminal hydrolase 14 OS=Mus musculus GN=Usp14 PE=1 SV=3          | 7.0993915 | 3  | 5   | 3  | 55.966 | 5.24 | 3300000   | 1300000   | 2400000   | 16.93  |
| P41242   | Megakaryocyte-associated tyrosine-protein kinase OS=Mus musculus GN=Matk PE=1 SV     | 3.960396  | 1  | 1   | 1  | 56.021 | 8.81 | 1100000   |           |           | 4.11   |
| O35874   | Neutral amino acid transporter A OS=Mus musculus GN=Slc1a4 PE=1 SV=1                 | 16.353383 | 6  | 17  | 5  | 56.026 | 5.87 | 18000000  | 9600000   | 12000000  | 47.14  |
| Q9CPY7   | Cytosol aminopeptidase OS=Mus musculus GN=Lap3 PE=1 SV=3                             | 2.8901734 | 1  | 1   | 1  | 56.106 | 7.72 |           | 380000    |           | 3.05   |
| P56480   | ATP synthase subunit beta, mitochondrial OS=Mus musculus GN=Atp5b PE=1 SV=2          | 60.302457 | 24 | 203 | 24 | 56.265 | 5.34 | 210000000 | 180000000 | 260000000 | 700.89 |
| Q6PD03   | Serine/threonine-protein phosphatase 2A 56 kDa regulatory subunit alpha isoform OS=M | 2.0576132 | 1  | 3   | 1  | 56.311 | 7.03 | 1500000   | 490000    | 1000000   | 6.47   |
| Q6PHZ2   | Calcium/calmodulin-dependent protein kinase type II subunit delta OS=Mus musculus GN | 23.647295 | 10 | 33  | 5  | 56.334 | 7.25 | 14000000  | 3200000   | 12000000  | 109.15 |
| Q3UYC0   | Protein phosphatase 1H OS=Mus musculus GN=Ppm1h PE=1 SV=1                            | 15.789474 | 6  | 11  | 6  | 56.345 | 6.73 | 2600000   | 2300000   | 4700000   | 29.56  |
| P16388   | Potassium voltage-gated channel subfamily A member 1 OS=Mus musculus GN=Kcna1 F      | 5.0505051 | 2  | 3   | 2  | 56.373 | 5.14 | 260000    |           | 940000    | 7.59   |
| P97797   | Tyrosine-protein phosphatase non-receptor type substrate 1 OS=Mus musculus GN=Sirp   | 13.255361 | 6  | 21  | 6  | 56.39  | 8.15 | 20000000  | 15000000  | 15000000  | 63.22  |
| P61922   | 4-aminobutyrate aminotransferase, mitochondrial OS=Mus musculus GN=Abat PE=1 SV=     | 16.6      | 6  | 20  | 6  | 56.416 | 8.09 | 14000000  | 2700000   | 7800000   | 71.95  |
| Q9QYI3   | DnaJ homolog subfamily C member 7 OS=Mus musculus GN=Dnajc7 PE=1 SV=2                | 8.9068826 | 4  | 9   | 4  | 56.44  | 6.49 | 2000000   | 690000    | 2200000   | 26.06  |
| Q9CQF9   | Prenylcysteine oxidase OS=Mus musculus GN=Pcyox1 PE=1 SV=1                           | 13.267327 | 5  | 12  | 5  | 56.459 | 6.92 | 2800000   | 960000    | 2200000   | 41.30  |
| P47738   | Aldehyde dehydrogenase, mitochondrial OS=Mus musculus GN=Aldh2 PE=1 SV=1             | 21.001927 | 9  | 21  | 9  | 56.502 | 7.62 | 3400000   | 3000000   | 5700000   | 55.61  |
| P62814   | V-type proton ATPase subunit B, brain isoform OS=Mus musculus GN=Atp6v1b2 PE=1 S     | 45.988258 | 20 | 74  | 20 | 56.515 | 5.81 | 76000000  | 51000000  | 72000000  | 214.47 |
| Q61753   | D-3-phosphoglycerate dehydrogenase OS=Mus musculus GN=Phgdh PE=1 SV=3                | 6.1913696 | 3  | 5   | 3  | 56.549 | 6.54 | 4600000   | 2200000   | 2500000   | 11.77  |
| Q99K28   | ADP-ribosylation factor GTPase-activating protein 2 OS=Mus musculus GN=Arfgap2 PE=   | 4.0384615 | 2  | 3   | 2  | 56.563 | 8.18 |           | 380000    |           | 7.11   |
| Q9JLT4   | Thioredoxin reductase 2, mitochondrial OS=Mus musculus GN=Txnr2 PE=1 SV=4            | 2.2900763 | 1  | 2   | 1  | 56.568 | 8.46 |           | 2300000   | 7900000   | 6.05   |
| Q8R1Q8   | Cytoplasmic dynein 1 light intermediate chain 1 OS=Mus musculus GN=Dync1li1 PE=1 S   | 16.443595 | 6  | 13  | 6  | 56.579 | 6.42 | 4400000   | 1600000   | 3400000   | 34.96  |
| P27773   | Protein disulfide-isomerase A3 OS=Mus musculus GN=Pdia3 PE=1 SV=2                    | 36.435644 | 14 | 40  | 14 | 56.643 | 6.21 | 25000000  | 15000000  | 23000000  | 120.48 |
| P63141   | Potassium voltage-gated channel subfamily A member 2 OS=Mus musculus GN=Kcna2 F      | 3.6072144 | 1  | 1   | 1  | 56.664 | 4.86 | 790000    |           |           | 4.10   |
| O35841   | Apoptosis inhibitor 5 OS=Mus musculus GN=Api5 PE=1 SV=2                              | 5.7539683 | 2  | 2   | 2  | 56.75  | 5.92 | 1100000   |           |           | 6.48   |
| Q9WVK8   | Cholesterol 24-hydroxylase OS=Mus musculus GN=Cyp46a1 PE=1 SV=1                      | 14.2      | 6  | 13  | 6  | 56.777 | 8.82 | 7700000   | 1500000   | 4300000   | 39.92  |

|          |                                                                                        |           |    |    |    |        |      |           |          |           |        |
|----------|----------------------------------------------------------------------------------------|-----------|----|----|----|--------|------|-----------|----------|-----------|--------|
| Q60676   | Serine/threonine-protein phosphatase 5 OS=Mus musculus GN=Ppp5c PE=1 SV=3              | 4.2084168 | 2  | 5  | 2  | 56.84  | 6.2  | 2700000   | 1800000  | 2700000   | 11.96  |
| Q8BYN5   | FSD1-like protein OS=Mus musculus GN=Fsd1l PE=1 SV=2                                   | 2.9585799 | 1  | 1  | 1  | 56.85  | 6.7  |           | 170000   |           | 3.27   |
| O70310   | Glycylpeptide N-tetradecanoyltransferase 1 OS=Mus musculus GN=Nmt1 PE=1 SV=1           | 2.6209677 | 1  | 4  | 1  | 56.852 | 8    | 190000    | 310000   | 390000    | 10.78  |
| Q8N1N4-2 | SWISS-PROT:Q8N1N4-2 Tax_Id=9606 Gene_Symbol=KRT78 Isoform 2 of x                       | 14.779271 | 7  | 16 | 5  | 56.93  | 6.02 |           | 2000000  | 5400000   | 40.15  |
| Q8CIM7   | Cytochrome P450 2D26 OS=Mus musculus GN=Cyp2d26 PE=1 SV=1                              | 2.4       | 1  | 3  | 1  | 56.939 | 6.64 | 1200000   | 280000   | 740000    | 6.18   |
| Q91ZJ5   | UTP--glucose-1-phosphate uridylyltransferase OS=Mus musculus GN=Ugp2 PE=1 SV=3         | 4.7244094 | 2  | 3  | 2  | 56.944 | 7.61 |           | 3000000  | 3500000   | 6.65   |
| Q99KK9   | Probable histidine--tRNA ligase, mitochondrial OS=Mus musculus GN=Hars2 PE=1 SV=1      | 3.3663366 | 2  | 3  | 1  | 56.949 | 8.32 | 1500000   |          |           | 6.45   |
| Q9ERA0   | Alpha-globin transcription factor CP2 OS=Mus musculus GN=Tfcp2 PE=1 SV=1               | 2.3904382 | 1  | 3  | 1  | 56.996 | 5.54 | 370000    | 180000   | 480000    | 8.89   |
| Q9JKF6   | Nectin-1 OS=Mus musculus GN=Nectin1 PE=1 SV=3                                          | 6.2135922 | 2  | 6  | 2  | 56.999 | 6.35 | 2700000   | 1300000  | 2500000   | 20.42  |
| P09103   | Protein disulfide-isomerase OS=Mus musculus GN=P4hb PE=1 SV=2                          | 22.789784 | 9  | 19 | 9  | 57.023 | 4.88 | 3300000   | 2900000  | 4800000   | 52.47  |
| Q922B2   | Aspartate--tRNA ligase, cytoplasmic OS=Mus musculus GN=Dars PE=1 SV=2                  | 17.365269 | 7  | 12 | 7  | 57.111 | 6.49 | 6200000   | 1900000  | 4000000   | 37.50  |
| Q5XJY5   | Coatomer subunit delta OS=Mus musculus GN=Arnc1 PE=1 SV=2                              | 10.763209 | 5  | 11 | 5  | 57.193 | 6.21 | 2600000   | 1300000  | 1700000   | 29.03  |
| Q9CXG3   | Peptidyl-prolyl cis-trans isomerase-like 4 OS=Mus musculus GN=Ppil4 PE=1 SV=2          | 2.2357724 | 1  | 1  | 1  | 57.195 | 6.11 |           |          | 1100000   | 2.24   |
| Q3THK3   | General transcription factor IIF subunit 1 OS=Mus musculus GN=Gtf2f1 PE=1 SV=2         | 3.1496063 | 1  | 1  | 1  | 57.206 | 7.01 |           |          | 250000    | 2.58   |
| O35633   | Vesicular inhibitory amino acid transporter OS=Mus musculus GN=Slc32a1 PE=1 SV=3       | 13.714286 | 5  | 12 | 5  | 57.344 | 6.64 | 15000000  | 3900000  | 8000000   | 46.24  |
| Q9R0H5   | Keratin, type II cytoskeletal 71 OS=Mus musculus GN=Krt71 PE=1 SV=1 x                  | 16.603053 | 9  | 31 | 3  | 57.347 | 6.99 |           |          | 3400000   | 89.40  |
| Q9ESX5   | H/ACA ribonucleoprotein complex subunit 4 OS=Mus musculus GN=Dkc1 PE=1 SV=4            | 5.697446  | 2  | 3  | 2  | 57.365 | 9.28 | 2300000   |          | 1500000   | 8.64   |
| Q61035   | Histidine--tRNA ligase, cytoplasmic OS=Mus musculus GN=Hars PE=1 SV=2                  | 5.5009823 | 3  | 6  | 2  | 57.396 | 6    | 2100000   | 840000   | 1800000   | 14.23  |
| Q91YW3   | DnaJ homolog subfamily C member 3 OS=Mus musculus GN=Dnajc3 PE=1 SV=1                  | 3.968254  | 2  | 2  | 2  | 57.428 | 5.85 |           | 670000   | 460000    | 4.24   |
| P80314   | T-complex protein 1 subunit beta OS=Mus musculus GN=Cct2 PE=1 SV=4                     | 15.88785  | 7  | 18 | 7  | 57.441 | 6.4  | 4900000   | 2400000  | 3100000   | 51.35  |
| Q923M0   | Protein phosphatase 1 regulatory subunit 16A OS=Mus musculus GN=Ppp1r16a PE=1 SV=1     | 3.2442748 | 1  | 1  | 1  | 57.494 | 5.81 |           |          | 1000000   | 1.85   |
| Q6NS82   | Protein FAM134A OS=Mus musculus GN=Fam134a PE=1 SV=2                                   | 2.4029575 | 1  | 3  | 1  | 57.506 | 4.46 | 4700000   | 1700000  | 3700000   | 12.69  |
| Q8JZK9   | Hydroxymethylglutaryl-CoA synthase, cytoplasmic OS=Mus musculus GN=Hmgcs1 PE=1         | 3.4615385 | 1  | 2  | 1  | 57.532 | 5.99 | 510000    | 190000   |           | 6.88   |
| Q8C0C7   | Phenylalanine--tRNA ligase alpha subunit OS=Mus musculus GN=Farsa PE=1 SV=1            | 4.7244094 | 2  | 2  | 2  | 57.563 | 8.28 | 5200000   | 820000   |           | 6.21   |
| Q6P5F7   | Protein tweety homolog 3 OS=Mus musculus GN=Ttyh3 PE=1 SV=1                            | 3.0534351 | 2  | 4  | 2  | 57.677 | 5.85 | 2900000   | 710000   | 1500000   | 15.38  |
| Q80XA6   | RalBP1-associated Eps domain-containing protein 2 OS=Mus musculus GN=Reps2 PE=1        | 5.3742802 | 2  | 3  | 1  | 57.714 | 7.53 | 1900000   |          | 3600000   | 9.59   |
| O35344   | Importin subunit alpha-4 OS=Mus musculus GN=Kpna3 PE=1 SV=1                            | 9.2130518 | 4  | 7  | 3  | 57.737 | 4.94 | 1100000   | 450000   | 900000    | 15.93  |
| Q9D0F3   | Protein ERGIC-53 OS=Mus musculus GN=Lman1 PE=1 SV=1                                    | 5.9961315 | 2  | 2  | 2  | 57.753 | 6.34 | 1700000   |          |           | 5.77   |
| P52480   | Pyruvate kinase PKM OS=Mus musculus GN=Pkm PE=1 SV=4                                   | 46.13936  | 22 | 70 | 22 | 57.808 | 7.47 | 130000000 | 63000000 | 120000000 | 247.94 |
| Q9QXW9   | Large neutral amino acids transporter small subunit 2 OS=Mus musculus GN=Slc7a8 PE=    | 7.3446328 | 3  | 3  | 3  | 57.836 | 6.67 | 2200000   |          |           | 8.73   |
| Q9EQ20   | Methylmalonate-semialdehyde dehydrogenase [acylating], mitochondrial OS=Mus muscul     | 11.775701 | 4  | 8  | 4  | 57.879 | 8.07 | 2200000   | 690000   | 1200000   | 24.27  |
| O35343   | Importin subunit alpha-3 OS=Mus musculus GN=Kpna4 PE=1 SV=1                            | 3.2629559 | 2  | 5  | 1  | 57.887 | 4.94 | 1800000   | 710000   | 1500000   | 10.34  |
| Q8CIN4   | Serine/threonine-protein kinase PAK 2 OS=Mus musculus GN=Pak2 PE=1 SV=1                | 8.9694656 | 3  | 9  | 1  | 57.894 | 5.77 | 1100000   | 610000   |           | 25.28  |
| P80317   | T-complex protein 1 subunit zeta OS=Mus musculus GN=Cct6a PE=1 SV=3                    | 19.397363 | 10 | 24 | 10 | 57.968 | 7.08 | 8100000   | 4100000  | 6000000   | 61.86  |
| P80315   | T-complex protein 1 subunit delta OS=Mus musculus GN=Cct4 PE=1 SV=3                    | 9.6474954 | 4  | 9  | 4  | 58.03  | 8.02 | 5800000   | 2000000  | 3300000   | 23.95  |
| G3XA57   | Rab11 family-interacting protein 2 OS=Mus musculus GN=Rab11fip2 PE=1 SV=1              | 2.9296875 | 1  | 2  | 1  | 58.171 | 9.45 | 620000    |          | 500000    | 5.11   |
| Q61466   | SWI/SNF-related matrix-associated actin-dependent regulator of chromatin subfamily D m | 5.0485437 | 2  | 2  | 2  | 58.208 | 9.25 |           |          | 810000    | 3.95   |
| Q9DC61   | Mitochondrial-processing peptidase subunit alpha OS=Mus musculus GN=Pmpca PE=1 S       | 3.6259542 | 1  | 1  | 1  | 58.242 | 6.83 |           |          | 600000    | 3.11   |
| Q8C3Q5   | Protein shisa-7 OS=Mus musculus GN=Shisa7 PE=1 SV=3                                    | 3.046595  | 1  | 2  | 1  | 58.297 | 9.82 | 850000    | 400000   |           | 5.16   |
| P10852   | 4F2 cell-surface antigen heavy chain OS=Mus musculus GN=Slc3a2 PE=1 SV=1               | 32.129278 | 15 | 48 | 15 | 58.3   | 5.91 | 63000000  | 27000000 | 45000000  | 130.66 |
| Q9DAW6   | U4/U6 small nuclear ribonucleoprotein Prp4 OS=Mus musculus GN=Prpf4 PE=1 SV=1          | 3.0710173 | 1  | 1  | 1  | 58.333 | 7.28 | 1100000   |          |           | 3.12   |
| P26638   | Serine--tRNA ligase, cytoplasmic OS=Mus musculus GN=Sars PE=1 SV=3                     | 8.7890625 | 3  | 5  | 3  | 58.352 | 6.3  | 5900000   | 1900000  | 4200000   | 15.98  |
| Q99MN9   | Propionyl-CoA carboxylase beta chain, mitochondrial OS=Mus musculus GN=Pccb PE=1       | 10.351201 | 4  | 8  | 4  | 58.372 | 7.66 | 3900000   | 1900000  | 4300000   | 25.69  |
| Q9CWX8   | Sorting nexin-2 OS=Mus musculus GN=Snx2 PE=1 SV=2                                      | 12.716763 | 6  | 14 | 5  | 58.435 | 5.12 | 2400000   | 1200000  | 2000000   | 41.79  |
| Q8BW75   | Amine oxidase [flavin-containing] B OS=Mus musculus GN=Maob PE=1 SV=4                  | 17.307692 | 7  | 18 | 6  | 58.52  | 8.29 | 4500000   | 2900000  | 5000000   | 52.14  |
| Q8C729   | Protein FAM126B OS=Mus musculus GN=Fam126b PE=1 SV=1                                   | 4.7169811 | 2  | 5  | 2  | 58.55  | 7.72 | 9700000   | 3000000  | 5700000   | 15.88  |
| P63328   | Serine/threonine-protein phosphatase 2B catalytic subunit alpha isoform OS=Mus muscul  | 35.892514 | 16 | 60 | 12 | 58.606 | 5.86 | 45000000  | 17000000 | 50000000  | 187.51 |
| Q61074   | Protein phosphatase 1G OS=Mus musculus GN=Ppm1g PE=1 SV=3                              | 23.062731 | 6  | 12 | 6  | 58.691 | 4.39 | 2100000   | 400000   | 810000    | 37.10  |

|        |                                                                                        |           |    |     |    |        |      |           |           |           |        |
|--------|----------------------------------------------------------------------------------------|-----------|----|-----|----|--------|------|-----------|-----------|-----------|--------|
| Q8R326 | Paraspeckle component 1 OS=Mus musculus GN=Pspc1 PE=1 SV=1                             | 7.456979  | 3  | 7   | 3  | 58.721 | 6.67 | 4800000   | 2100000   | 7900000   | 19.84  |
| O08795 | Glucosidase 2 subunit beta OS=Mus musculus GN=Prkcsb PE=1 SV=1                         | 15.163148 | 6  | 18  | 6  | 58.756 | 4.46 | 4700000   | 4100000   | 6300000   | 53.59  |
| Q9D554 | Splicing factor 3A subunit 3 OS=Mus musculus GN=Sf3a3 PE=1 SV=2                        | 11.576846 | 3  | 6   | 3  | 58.805 | 5.34 | 3200000   |           | 2000000   | 19.52  |
| Q8C166 | Copine-1 OS=Mus musculus GN=Cpne1 PE=1 SV=1                                            | 1.6791045 | 1  | 3   | 1  | 58.849 | 5.66 | 540000    | 220000    | 430000    | 6.20   |
| Q32MB2 | TREMBL:Q32MB2;Q86Y46 Tax_Id=9606 Gene_Symbol=KRT73 Keratin-73 x                        | 8.5185185 | 5  | 23  | 0  | 58.887 | 7.23 |           |           |           | 55.70  |
| Q80SW1 | Putative adenosylhomocysteinase 2 OS=Mus musculus GN=Ahcyl1 PE=1 SV=1                  | 23.584906 | 12 | 39  | 3  | 58.913 | 6.89 | 14000000  | 3300000   | 5500000   | 100.87 |
| Q9VW80 | Sorting nexin-1 OS=Mus musculus GN=Snx1 PE=1 SV=1                                      | 10.91954  | 5  | 13  | 4  | 58.916 | 5.22 | 2800000   | 1700000   | 2600000   | 36.35  |
| Q91WQ3 | Tyrosine--tRNA ligase, cytoplasmic OS=Mus musculus GN=Yars PE=1 SV=3                   | 9.6590909 | 5  | 5   | 5  | 59.068 | 7.01 | 1300000   | 1100000   | 1200000   | 12.02  |
| Q9Z2A5 | Arginyl-tRNA--protein transferase 1 OS=Mus musculus GN=Ate1 PE=1 SV=2                  | 2.3255814 | 1  | 1   | 1  | 59.108 | 8.19 | 800000    |           |           | 2.64   |
| Q6NVF9 | Cleavage and polyadenylation specificity factor subunit 6 OS=Mus musculus GN=Cpsf6 F   | 2.5408348 | 1  | 2   | 1  | 59.116 | 7.15 | 3200000   |           | 720000    | 5.90   |
| P48453 | Serine/threonine-protein phosphatase 2B catalytic subunit beta isoform OS=Mus musculus | 29.52381  | 11 | 41  | 7  | 59.136 | 5.91 | 4000000   | 3400000   | 6200000   | 117.65 |
| P63137 | Gamma-aminobutyric acid receptor subunit beta-2 OS=Mus musculus GN=Gabbr2 PE=1         | 11.132813 | 4  | 9   | 3  | 59.158 | 9.31 | 2900000   | 1400000   | 2600000   | 26.43  |
| Q8BKX1 | Brain-specific angiogenesis inhibitor 1-associated protein 2 OS=Mus musculus GN=Baiap  | 32.71028  | 14 | 31  | 14 | 59.2   | 9.04 | 13000000  | 7300000   | 8400000   | 87.38  |
| Q00612 | Glucose-6-phosphate 1-dehydrogenase X OS=Mus musculus GN=G6pdx PE=1 SV=3               | 1.3592233 | 1  | 1   | 1  | 59.225 | 6.49 | 950000    |           |           | 1.84   |
| Q8VH51 | RNA-binding protein 39 OS=Mus musculus GN=Rbm39 PE=1 SV=2                              | 7.1698113 | 3  | 6   | 3  | 59.37  | 10.1 | 4500000   |           | 2800000   | 19.13  |
| P13645 | SWISS-PROT:P13645 Tax_Id=9606 Gene_Symbol=KRT10 Keratin, type I c x                    | 47.048904 | 26 | 164 | 21 | 59.475 | 5.21 | 730000000 | 700000000 | 1E+09     | 510.74 |
| P42932 | T-complex protein 1 subunit theta OS=Mus musculus GN=Cct8 PE=1 SV=3                    | 19.708029 | 9  | 26  | 9  | 59.518 | 5.62 | 5400000   | 2600000   | 3600000   | 72.28  |
| Q8C0P5 | Coronin-2A OS=Mus musculus GN=Coro2a PE=2 SV=1                                         | 4.5801527 | 2  | 3   | 1  | 59.535 | 7.71 |           | 760000    |           | 7.61   |
| Q64133 | Amine oxidase [flavin-containing] A OS=Mus musculus GN=Maoa PE=1 SV=3                  | 17.870722 | 8  | 17  | 7  | 59.564 | 7.81 | 8400000   | 3000000   | 3500000   | 45.16  |
| Q923T9 | Calcium/calmodulin-dependent protein kinase type II subunit gamma OS=Mus musculus C    | 22.495274 | 10 | 29  | 6  | 59.569 | 7.58 | 22000000  | 2100000   | 20000000  | 92.10  |
| P56564 | Excitatory amino acid transporter 1 OS=Mus musculus GN=Slc1a3 PE=1 SV=2                | 17.679558 | 7  | 49  | 6  | 59.584 | 8.4  | 46000000  | 18000000  | 35000000  | 188.41 |
| P80316 | T-complex protein 1 subunit epsilon OS=Mus musculus GN=Cct5 PE=1 SV=1                  | 17.744917 | 9  | 21  | 9  | 59.586 | 6.02 | 7700000   | 4500000   | 6200000   | 58.37  |
| P80313 | T-complex protein 1 subunit eta OS=Mus musculus GN=Cct7 PE=1 SV=1                      | 12.5      | 7  | 17  | 7  | 59.614 | 7.84 | 7900000   | 2600000   | 3800000   | 40.74  |
| Q99JF8 | PC4 and SFRS1-interacting protein OS=Mus musculus GN=Psp1 PE=1 SV=1                    | 15.909091 | 6  | 20  | 6  | 59.66  | 9.13 | 15000000  | 350000    | 8900000   | 70.20  |
| Q922P9 | Putative oxidoreductase GLYR1 OS=Mus musculus GN=Glyr1 PE=1 SV=1                       | 2.5641026 | 1  | 2   | 1  | 59.678 | 9.22 | 700000    |           | 530000    | 5.10   |
| Q9D0L4 | Uncharacterized aarF domain-containing protein kinase 1 OS=Mus musculus GN=Adck1       | 3.2380952 | 1  | 3   | 1  | 59.698 | 8.05 | 1700000   | 590000    | 630000    | 11.31  |
| Q8BI72 | CDKN2A-interacting protein OS=Mus musculus GN=Cdkn2aip PE=1 SV=1                       | 5.8614565 | 2  | 4   | 2  | 59.708 | 9.16 | 840000    |           | 370000    | 11.51  |
| Q03265 | ATP synthase subunit alpha, mitochondrial OS=Mus musculus GN=Atp5a1 PE=1 SV=1          | 44.303797 | 23 | 111 | 23 | 59.716 | 9.19 | 310000000 | 200000000 | 230000000 | 359.10 |
| P70297 | Signal transducing adapter molecule 1 OS=Mus musculus GN=Stam PE=1 SV=3                | 5.2919708 | 2  | 4   | 2  | 59.733 | 4.84 | 1700000   | 990000    | 1600000   | 11.78  |
| P24270 | Catalase OS=Mus musculus GN=Cat PE=1 SV=4                                              | 5.1233397 | 2  | 2   | 2  | 59.758 | 7.88 |           | 260000    | 3300000   | 5.31   |
| Q9CTY5 | Calcium uptake protein 3, mitochondrial OS=Mus musculus GN=Micu3 PE=2 SV=2             | 6.500956  | 3  | 6   | 3  | 59.772 | 7.15 | 1400000   | 330000    | 1400000   | 15.84  |
| P97492 | Regulator of G-protein signaling 14 OS=Mus musculus GN=Rgs14 PE=1 SV=2                 | 2.0109689 | 1  | 1   | 1  | 59.81  | 7.43 | 400000    |           |           | 2.21   |
| Q99J45 | Nuclear receptor-binding protein OS=Mus musculus GN=Nrbp1 PE=1 SV=1                    | 2.2429907 | 1  | 1   | 1  | 59.828 | 5.08 | 330000    |           |           | 2.87   |
| O35345 | Importin subunit alpha-7 OS=Mus musculus GN=Kpna6 PE=1 SV=2                            | 6.1567164 | 2  | 4   | 1  | 59.926 | 4.94 | 1400000   | 510000    |           | 12.04  |
| O70324 | Monocarboxylate transporter 8 OS=Mus musculus GN=Slc16a2 PE=1 SV=2                     | 4.2201835 | 1  | 1   | 1  | 59.986 | 5.59 | 630000    |           |           | 2.61   |
| P48668 | SWISS-PROT:P48668 Tax_Id=9606 Gene_Symbol=KRT6C Keratin, type III x                    | 38.297872 | 24 | 65  | 8  | 59.988 | 8    | 3200000   | 1200000   | 16000000  | 167.49 |
| Q8BMP6 | Golgi resident protein GCP60 OS=Mus musculus GN=Acbd3 PE=1 SV=3                        | 2.8571429 | 1  | 2   | 1  | 60.144 | 5.11 |           |           | 1400000   | 5.73   |
| Q60960 | Importin subunit alpha-5 OS=Mus musculus GN=Kpna1 PE=1 SV=2                            | 6.133829  | 2  | 4   | 1  | 60.144 | 5.01 | 240000    |           | 1000000   | 12.25  |
| Q80VP1 | Epsin-1 OS=Mus musculus GN=Epn1 PE=1 SV=3                                              | 5.3913043 | 3  | 9   | 3  | 60.175 | 4.81 | 4800000   | 4100000   | 6200000   | 23.90  |
| Q3UEB3 | Poly(U)-binding-splicing factor PUF60 OS=Mus musculus GN=Puf60 PE=1 SV=2               | 6.7375887 | 3  | 8   | 3  | 60.211 | 5.29 | 3200000   | 1800000   | 2600000   | 25.33  |
| Q8VBW6 | NEDD8-activating enzyme E1 regulatory subunit OS=Mus musculus GN=Nae1 PE=1 SV=         | 5.6179775 | 2  | 4   | 2  | 60.236 | 5.52 | 2100000   | 820000    | 1500000   | 10.89  |
| O88939 | Zinc finger and BTB domain-containing protein 7A OS=Mus musculus GN=Zbtb7a PE=1 S      | 6.8541301 | 2  | 2   | 2  | 60.243 | 5.12 |           |           |           | 6.47   |
| Q6DFW4 | Nucleolar protein 58 OS=Mus musculus GN=Nop58 PE=1 SV=1                                | 2.238806  | 1  | 2   | 1  | 60.305 | 8.34 | 2100000   |           |           | 5.57   |
| Q71M36 | Chondroitin sulfate proteoglycan 5 OS=Mus musculus GN=Cspg5 PE=1 SV=2                  | 12.367491 | 6  | 22  | 6  | 60.368 | 4.54 | 25000000  | 15000000  | 25000000  | 65.19  |
| P11983 | T-complex protein 1 subunit alpha OS=Mus musculus GN=Tcp1 PE=1 SV=3                    | 14.388489 | 7  | 16  | 7  | 60.411 | 6.16 | 7400000   | 2500000   | 2600000   | 43.83  |
| P28652 | Calcium/calmodulin-dependent protein kinase type II subunit beta OS=Mus musculus GN=   | 39.483395 | 14 | 65  | 9  | 60.423 | 7.28 | 51000000  | 14000000  | 52000000  | 225.55 |
| Q8R4G0 | Netrin-G1 OS=Mus musculus GN=Ntng1 PE=1 SV=2                                           | 5.5658627 | 2  | 4   | 2  | 60.526 | 6.24 | 740000    | 590000    | 1400000   | 10.41  |
| Q91YH5 | Atlastin-3 OS=Mus musculus GN=Atl3 PE=1 SV=1                                           | 3.8817006 | 2  | 3   | 2  | 60.537 | 6.1  | 810000    | 230000    |           | 4.46   |



|        |                                                                                                                      |           |    |     |    |        |      |           |           |           |        |
|--------|----------------------------------------------------------------------------------------------------------------------|-----------|----|-----|----|--------|------|-----------|-----------|-----------|--------|
| Q9JLB9 | Nectin-3 OS=Mus musculus GN=Nectin3 PE=1 SV=1                                                                        | 3.6429872 | 1  | 3   | 1  | 60.545 | 6.54 | 1600000   | 1200000   | 1700000   | 10.25  |
| Q9WVK4 | EH domain-containing protein 1 OS=Mus musculus GN=Ehd1 PE=1 SV=1                                                     | 8.988764  | 4  | 9   | 3  | 60.565 | 6.83 | 1900000   | 1600000   | 2000000   | 25.21  |
| P80318 | T-complex protein 1 subunit gamma OS=Mus musculus GN=Cct3 PE=1 SV=1                                                  | 21.651376 | 10 | 21  | 10 | 60.591 | 6.7  | 6500000   | 3000000   | 2300000   | 55.64  |
| P05480 | Neuronal proto-oncogene tyrosine-protein kinase Src OS=Mus musculus GN=Src PE=1 SV=1                                 | 6.284658  | 3  | 6   | 3  | 60.606 | 7.84 | 3100000   | 3000000   | 2200000   | 18.34  |
| Q9EP89 | Serine beta-lactamase-like protein LACTB, mitochondrial OS=Mus musculus GN=Lactb PE=1 SV=1                           | 3.9927405 | 2  | 5   | 2  | 60.667 | 8.9  | 3100000   | 2500000   | 2700000   | 13.10  |
| P14685 | 26S proteasome non-ATPase regulatory subunit 3 OS=Mus musculus GN=Psm3 PE=1 SV=1                                     | 18.679245 | 8  | 23  | 8  | 60.68  | 8.44 | 7100000   | 1700000   | 4200000   | 68.35  |
| O88643 | Serine/threonine-protein kinase PAK 1 OS=Mus musculus GN=Pak1 PE=1 SV=1                                              | 19.449541 | 8  | 23  | 6  | 60.699 | 5.74 | 5600000   | 2700000   | 6100000   | 67.79  |
| P54830 | Tyrosine-protein phosphatase non-receptor type 5 OS=Mus musculus GN=Ptpn5 PE=1 SV=1                                  | 1.4787431 | 1  | 2   | 1  | 60.776 | 5.2  | 1500000   |           | 1000000   | 4.75   |
| Q9QXY6 | EH domain-containing protein 3 OS=Mus musculus GN=Ehd3 PE=1 SV=2                                                     | 24.299065 | 10 | 28  | 9  | 60.783 | 6.46 | 9800000   | 6000000   | 8100000   | 90.72  |
| Q60996 | Serine/threonine-protein phosphatase 2A 56 kDa regulatory subunit gamma isoform OS=Mus musculus GN=Ppp2r2a PE=1 SV=1 | 2.480916  | 1  | 2   | 1  | 60.785 | 6.64 | 2300000   |           | 1500000   | 5.59   |
| Q3TEA8 | Heterochromatin protein 1-binding protein 3 OS=Mus musculus GN=Hp1bp3 PE=1 SV=1                                      | 23.104693 | 10 | 15  | 10 | 60.829 | 9.7  | 14000000  |           | 8900000   | 37.36  |
| Q3UTH8 | Rho guanine nucleotide exchange factor 9 OS=Mus musculus GN=Arhgef9 PE=1 SV=1                                        | 2.1317829 | 1  | 2   | 1  | 60.888 | 5.64 | 1000000   |           | 1500000   | 5.16   |
| P63038 | 60 kDa heat shock protein, mitochondrial OS=Mus musculus GN=Hspd1 PE=1 SV=1                                          | 32.111693 | 15 | 48  | 15 | 60.917 | 6.18 | 24000000  | 23000000  | 30000000  | 159.03 |
| Q3UHD6 | Sorting nexin-27 OS=Mus musculus GN=Snx27 PE=1 SV=2                                                                  | 10.575139 | 5  | 10  | 5  | 60.95  | 6.4  | 1600000   | 930000    | 1600000   | 25.97  |
| P20060 | Beta-hexosaminidase subunit beta OS=Mus musculus GN=Hexb PE=1 SV=2                                                   | 1.4925373 | 1  | 1   | 1  | 61.077 | 8.12 |           |           | 520000    | 2.04   |
| Q3UV70 | [Pyruvate dehydrogenase [acetyl-transferring]]-phosphatase 1, mitochondrial OS=Mus musculus GN=Pdhf1 PE=1 SV=1       | 4.4609665 | 2  | 3   | 2  | 61.142 | 6.67 |           | 1600000   | 2900000   | 11.14  |
| Q01065 | Calcium/calmodulin-dependent 3',5'-cyclic nucleotide phosphodiesterase 1B OS=Mus musculus GN=Cdc25b PE=1 SV=1        | 4.1121495 | 2  | 4   | 1  | 61.187 | 5.72 | 2100000   |           |           | 11.76  |
| Q64516 | Glycerol kinase OS=Mus musculus GN=Gk PE=1 SV=2                                                                      | 8.9445438 | 5  | 11  | 5  | 61.188 | 5.87 | 2500000   | 1500000   | 2800000   | 25.85  |
| Q60598 | Src substrate cortactin OS=Mus musculus GN=Cttn PE=1 SV=2                                                            | 22.893773 | 9  | 19  | 9  | 61.212 | 5.4  | 12000000  | 5500000   | 12000000  | 56.71  |
| P26443 | Glutamate dehydrogenase 1, mitochondrial OS=Mus musculus GN=Glud1 PE=1 SV=1                                          | 42.114695 | 20 | 73  | 20 | 61.298 | 8    | 100000000 | 55000000  | 93000000  | 216.84 |
| Q3ULD5 | Methylcrotonyl-CoA carboxylase beta chain, mitochondrial OS=Mus musculus GN=Mccc1 PE=1 SV=1                          | 9.4138544 | 3  | 7   | 3  | 61.34  | 8    | 2600000   | 780000    | 1300000   | 24.96  |
| Q9D0F9 | Phosphoglucomutase-1 OS=Mus musculus GN=Pgm1 PE=1 SV=4                                                               | 2.8469751 | 1  | 2   | 1  | 61.38  | 6.57 | 1600000   | 340000    |           | 5.40   |
| Q61207 | Prosaposin OS=Mus musculus GN=Psap PE=1 SV=2                                                                         | 3.5906643 | 2  | 4   | 2  | 61.381 | 5.19 | 18000000  | 6400000   | 15000000  | 10.32  |
| O88447 | Kinesin light chain 1 OS=Mus musculus GN=Klc1 PE=1 SV=3                                                              | 16.63586  | 8  | 17  | 7  | 61.412 | 5.68 | 3800000   | 1200000   | 2100000   | 46.31  |
| Q9CSN1 | SNW domain-containing protein 1 OS=Mus musculus GN=Snw1 PE=1 SV=3                                                    | 6.3432836 | 2  | 3   | 2  | 61.438 | 9.48 | 980000    |           |           | 6.63   |
| Q8R5H6 | Wiskott-Aldrich syndrome protein family member 1 OS=Mus musculus GN=Wasf1 PE=1 SV=1                                  | 10.733453 | 5  | 11  | 5  | 61.471 | 6.37 | 12000000  | 3400000   | 16000000  | 35.56  |
| P08551 | Neurofilament light polypeptide OS=Mus musculus GN=Nefl PE=1 SV=5                                                    | 54.327808 | 28 | 82  | 25 | 61.471 | 4.64 | 25000000  | 8600000   | 49000000  | 245.75 |
| Q9EQF6 | Dihydropyrimidinase-related protein 5 OS=Mus musculus GN=Dpysl5 PE=1 SV=1                                            | 10.638298 | 5  | 12  | 5  | 61.477 | 7.09 | 6200000   | 1400000   | 2000000   | 29.83  |
| Q9WV34 | MAGUK p55 subfamily member 2 OS=Mus musculus GN=Mpp2 PE=1 SV=1                                                       | 26.992754 | 14 | 33  | 14 | 61.517 | 6.44 | 11000000  | 4800000   | 9400000   | 94.60  |
| Q3TX4  | Vesicular glutamate transporter 1 OS=Mus musculus GN=Slc17a7 PE=1 SV=2                                               | 14.821429 | 8  | 28  | 7  | 61.597 | 7.34 | 67000000  | 17000000  | 39000000  | 76.01  |
| Q9Z140 | Copine-6 OS=Mus musculus GN=Cpne6 PE=1 SV=1                                                                          | 19.928187 | 10 | 20  | 9  | 61.742 | 5.59 | 7000000   | 3400000   | 5800000   | 48.33  |
| Q7Z794 | SWISS-PROT:Q7Z794 Tax_Id=9606 Gene_Symbol=KRT77 Keratin 77 x                                                         | 18.512111 | 12 | 36  | 7  | 61.764 | 5.85 |           | 980000    | 4800000   | 98.92  |
| Q8K406 | Leucine-rich repeat LGI family member 3 OS=Mus musculus GN=Lgi3 PE=1 SV=1                                            | 6.5693431 | 3  | 6   | 3  | 61.779 | 8.16 | 650000    | 520000    | 1200000   | 19.92  |
| Q5SU73 | Coilin OS=Mus musculus GN=Coil PE=1 SV=1                                                                             | 2.4561404 | 1  | 1   | 1  | 61.879 | 9    | 410000    |           |           | 1.90   |
| Q62188 | Dihydropyrimidinase-related protein 3 OS=Mus musculus GN=Dpysl3 PE=1 SV=1                                            | 20        | 8  | 30  | 4  | 61.897 | 6.49 | 3600000   | 2400000   | 3200000   | 97.39  |
| O35098 | Dihydropyrimidinase-related protein 4 OS=Mus musculus GN=Dpysl4 PE=1 SV=1                                            | 14.685315 | 6  | 14  | 5  | 61.922 | 6.98 | 5100000   | 1800000   | 3000000   | 47.00  |
| Q8R317 | Ubiquilin-1 OS=Mus musculus GN=Ubln1 PE=1 SV=1                                                                       | 3.7800687 | 2  | 4   | 1  | 61.937 | 4.94 | 1500000   | 920000    | 1700000   | 9.88   |
| P43006 | Excitatory amino acid transporter 2 OS=Mus musculus GN=Slc1a2 PE=1 SV=1                                              | 20.27972  | 12 | 114 | 12 | 61.99  | 6.68 | 370000000 | 130000000 | 310000000 | 326.88 |
| P35527 | SWISS-PROT:P35527 Tax_Id=9606 Gene_Symbol=KRT9 Keratin, type I cy x                                                  | 53.932584 | 28 | 170 | 27 | 62.092 | 5.3  | 140000000 | 44000000  | 670000000 | 603.41 |
| Q80VL1 | Tudor and KH domain-containing protein OS=Mus musculus GN=Tdrkh PE=1 SV=1                                            | 7.1428571 | 3  | 4   | 3  | 62.095 | 4.94 | 1600000   |           | 860000    | 10.34  |
| P97427 | Dihydropyrimidinase-related protein 1 OS=Mus musculus GN=Crpm1 PE=1 SV=1                                             | 24.825175 | 12 | 43  | 8  | 62.129 | 7.12 | 16000000  | 8000000   | 13000000  | 140.25 |
| O08553 | Dihydropyrimidinase-related protein 2 OS=Mus musculus GN=Dpysl2 PE=1 SV=2                                            | 67.482517 | 27 | 162 | 22 | 62.239 | 6.38 | 190000000 | 89000000  | 170000000 | 547.31 |
| Q6PAM1 | Alpha-taxilin OS=Mus musculus GN=Txlna PE=1 SV=1                                                                     | 3.2490975 | 1  | 1   | 1  | 62.33  | 6.74 | 570000    |           |           | 2.30   |
| P13647 | SWISS-PROT:P13647 Tax_Id=9606 Gene_Symbol=KRT5 Keratin, type II c x                                                  | 42.20339  | 29 | 111 | 16 | 62.34  | 7.74 | 54000000  | 32000000  | 100000000 | 301.38 |
| Q8BLR2 | Copine-4 OS=Mus musculus GN=Cpne4 PE=1 SV=1                                                                          | 3.2315978 | 2  | 5   | 1  | 62.368 | 6.33 | 730000    | 190000    | 360000    | 11.47  |
| P34914 | Bifunctional epoxide hydrolase 2 OS=Mus musculus GN=Ephx2 PE=1 SV=2                                                  | 3.4296029 | 1  | 3   | 1  | 62.475 | 6.19 | 800000    | 220000    | 600000    | 8.83   |
| Q8CJ67 | Double-stranded RNA-binding protein Staufen homolog 2 OS=Mus musculus GN=Stau2 PE=1 SV=1                             | 2.2807018 | 1  | 1   | 1  | 62.496 | 9.6  | 450000    |           |           | 3.82   |
| Q60864 | Stress-induced-phosphoprotein 1 OS=Mus musculus GN=Stip1 PE=1 SV=1                                                   | 17.495396 | 8  | 14  | 8  | 62.542 | 6.8  | 4600000   | 2700000   | 5000000   | 40.32  |

|        |                                                                                         |           |    |    |    |        |      |          |           |          |        |
|--------|-----------------------------------------------------------------------------------------|-----------|----|----|----|--------|------|----------|-----------|----------|--------|
| Q9JLB0 | MAGUK p55 subfamily member 6 OS=Mus musculus GN=Mpp6 PE=1 SV=1                          | 11.934901 | 6  | 12 | 6  | 62.592 | 6.4  | 5000000  | 2400000   | 3400000  | 33.07  |
| Q3U0K8 | Prolyl 3-hydroxylase OGFOD1 OS=Mus musculus GN=Ogfod1 PE=1 SV=1                         | 9.3577982 | 2  | 5  | 2  | 62.695 | 4.91 | 960000   | 490000    | 710000   | 22.55  |
| P06745 | Glucose-6-phosphate isomerase OS=Mus musculus GN=Gpi PE=1 SV=4                          | 23.297491 | 10 | 30 | 10 | 62.727 | 8.13 | 14000000 | 5600000   | 12000000 | 86.82  |
| Q3UV17 | Keratin, type II cytoskeletal 2 oral OS=Mus musculus GN=Krt76 PE=1 SV=1                 | 9.2592593 | 6  | 22 | 1  | 62.806 | 8.43 |          | 310000000 | 1.6E+09  | 50.97  |
| Q9Z2D0 | Myotubularin-related protein 9 OS=Mus musculus GN=Mtmr9 PE=1 SV=2                       | 1.4678899 | 1  | 2  | 1  | 62.868 | 6.62 | 740000   |           | 560000   | 4.28   |
| Q8VCM8 | Nicalin OS=Mus musculus GN=Ncln PE=1 SV=2                                               | 4.0852575 | 2  | 2  | 2  | 62.868 | 6.49 |          | 860000    |          | 5.56   |
| Q91WG5 | 5'-AMP-activated protein kinase subunit gamma-2 OS=Mus musculus GN=Prkg2 PE=1 SV=1      | 1.7667845 | 1  | 1  | 1  | 62.91  | 9.36 | 1600000  |           |          | 3.07   |
| Q8K4Z0 | Leucine-rich repeat LGI family member 2 OS=Mus musculus GN=Lgi2 PE=2 SV=1               | 2.1818182 | 1  | 1  | 1  | 62.966 | 6.54 |          |           | 1800000  | 2.04   |
| Q8C6B2 | Rhotekin OS=Mus musculus GN=Rtkn PE=1 SV=3                                              | 2.6595745 | 1  | 1  | 1  | 62.973 | 6.67 |          |           | 590000   | 3.13   |
| Q9Z1Q2 | Protein ABHD16A OS=Mus musculus GN=Abhd16a PE=1 SV=3                                    | 2.8673835 | 1  | 3  | 1  | 63.046 | 8.25 | 2300000  |           | 1300000  | 9.09   |
| Q8C437 | PEX5-related protein OS=Mus musculus GN=Pex5l PE=1 SV=2                                 | 12.169312 | 5  | 14 | 5  | 63.096 | 5.33 | 4600000  | 1600000   | 4300000  | 45.31  |
| Q3UHB1 | 5'-nucleotidase domain-containing protein 3 OS=Mus musculus GN=Nt5dc3 PE=1 SV=1         | 5.4945055 | 3  | 9  | 3  | 63.13  | 8.56 | 2700000  | 1300000   | 1900000  | 23.21  |
| O08914 | Fatty-acid amide hydrolase 1 OS=Mus musculus GN=Faah PE=1 SV=1                          | 1.5544041 | 1  | 2  | 1  | 63.18  | 7.87 | 1000000  |           | 470000   | 4.50   |
| Q5U458 | DnaJ homolog subfamily C member 11 OS=Mus musculus GN=Dnajc11 PE=1 SV=2                 | 6.2611807 | 3  | 6  | 3  | 63.194 | 8.32 | 2600000  | 710000    | 2000000  | 15.79  |
| Q3UUG6 | TBC1 domain family member 24 OS=Mus musculus GN=Tbc1d24 PE=1 SV=2                       | 7.8431373 | 4  | 9  | 4  | 63.195 | 7.24 | 4800000  | 1400000   | 2800000  | 23.00  |
| Q8C854 | Myelin expression factor 2 OS=Mus musculus GN=Myef2 PE=1 SV=1                           | 13.367174 | 8  | 17 | 8  | 63.254 | 8.87 | 12000000 | 3400000   | 6000000  | 50.34  |
| Q8CI51 | PDZ and LIM domain protein 5 OS=Mus musculus GN=Pdlim5 PE=1 SV=4                        | 3.7225042 | 1  | 1  | 1  | 63.259 | 8.25 | 360000   |           |          | 2.48   |
| Q920P5 | Adenylate kinase isoenzyme 5 OS=Mus musculus GN=Ak5 PE=1 SV=2                           | 3.202847  | 1  | 2  | 1  | 63.283 | 5.29 |          | 1900000   | 3300000  | 6.03   |
| Q64332 | Synapsin-2 OS=Mus musculus GN=Syn2 PE=1 SV=2                                            | 37.883959 | 16 | 67 | 14 | 63.333 | 8.43 | 31000000 | 23000000  | 30000000 | 239.63 |
| Q8BH66 | Atlastin-1 OS=Mus musculus GN=Atl1 PE=1 SV=1                                            | 13.978495 | 8  | 17 | 8  | 63.337 | 6.49 | 14000000 | 3000000   | 7600000  | 45.99  |
| Q8BXN9 | Transmembrane protein 87A OS=Mus musculus GN=Tmem87a PE=1 SV=1                          | 5.045045  | 2  | 4  | 2  | 63.339 | 6.67 | 1600000  | 520000    | 570000   | 10.91  |
| Q8C4G9 | Adhesion G protein-coupled receptor A1 OS=Mus musculus GN=Adgra1 PE=2 SV=1              | 2.4221453 | 1  | 2  | 1  | 63.455 | 7.43 | 2700000  |           | 1300000  | 5.90   |
| P46061 | Ran GTPase-activating protein 1 OS=Mus musculus GN=Rangap1 PE=1 SV=2                    | 5.942275  | 3  | 5  | 3  | 63.491 | 4.68 | 2400000  |           | 1100000  | 13.09  |
| Q505F5 | Leucine-rich repeat-containing protein 47 OS=Mus musculus GN=Lrrc47 PE=1 SV=1           | 6.0240964 | 3  | 5  | 3  | 63.551 | 8.1  | 2100000  | 720000    | 1700000  | 14.66  |
| Q9R1C6 | Diacylglycerol kinase epsilon OS=Mus musculus GN=Dgke PE=1 SV=1                         | 6.7375887 | 3  | 3  | 3  | 63.593 | 7.44 | 1300000  |           | 1600000  | 7.37   |
| Q9JIA1 | Leucine-rich glioma-inactivated protein 1 OS=Mus musculus GN=Lgi1 PE=1 SV=1             | 17.235189 | 9  | 22 | 9  | 63.603 | 8.02 | 8000000  | 5100000   | 6100000  | 60.98  |
| Q91YN0 | Protein C12orf4 homolog OS=Mus musculus GN=D6Wsu163e PE=1 SV=1                          | 4.3478261 | 1  | 1  | 1  | 63.604 | 6.18 | 1200000  |           |          | 2.90   |
| Q8BMK4 | Cytoskeleton-associated protein 4 OS=Mus musculus GN=Ckap4 PE=1 SV=2                    | 11.478261 | 5  | 6  | 5  | 63.654 | 5.64 | 1300000  |           | 1300000  | 15.80  |
| Q9Z2A0 | 3-phosphoinositide-dependent protein kinase 1 OS=Mus musculus GN=Pdk1 PE=1 SV=1         | 5.3667263 | 2  | 4  | 2  | 63.718 | 7.37 | 2400000  |           | 720000   | 11.33  |
| Q80WJ7 | Protein LYRIC OS=Mus musculus GN=Mtdh PE=1 SV=1                                         | 23.143351 | 10 | 20 | 10 | 63.808 | 9.33 | 7000000  | 1100000   | 3300000  | 54.79  |
| Q4VBD2 | Transmembrane anterior posterior transformation protein 1 OS=Mus musculus GN=Tapt1      | 1.7730496 | 1  | 1  | 1  | 63.853 | 8.22 | 990000   |           |          | 2.36   |
| O55176 | E3 ubiquitin-protein ligase Praja-1 OS=Mus musculus GN=Pja1 PE=1 SV=3                   | 2.4221453 | 1  | 2  | 1  | 63.866 | 4.97 | 360000   |           | 470000   | 5.51   |
| Q69Z99 | Zinc finger protein 512 OS=Mus musculus GN=Znf512 PE=2 SV=2                             | 15.480427 | 6  | 9  | 6  | 63.867 | 9.51 | 1400000  |           | 1900000  | 26.74  |
| P06801 | NADP-dependent malic enzyme OS=Mus musculus GN=Me1 PE=1 SV=2                            | 4.8951049 | 3  | 5  | 3  | 63.913 | 7.44 | 1200000  |           | 1100000  | 11.63  |
| Q8BYK6 | YTH domain-containing family protein 3 OS=Mus musculus GN=Ythdf3 PE=1 SV=2              | 2.7350427 | 1  | 1  | 1  | 63.922 | 9.04 | 700000   |           |          | 3.77   |
| Q8R081 | Heterogeneous nuclear ribonucleoprotein L OS=Mus musculus GN=Hnrnpl PE=1 SV=2           | 29.692833 | 10 | 37 | 10 | 63.923 | 8.1  | 46000000 | 9000000   | 27000000 | 140.90 |
| O70194 | Eukaryotic translation initiation factor 3 subunit D OS=Mus musculus GN=Eif3d PE=1 SV=1 | 19.890511 | 8  | 15 | 8  | 63.948 | 6.05 | 4200000  | 610000    | 2400000  | 37.99  |
| Q9Z1K5 | E3 ubiquitin-protein ligase ARIH1 OS=Mus musculus GN=Arih1 PE=1 SV=3                    | 2.5225225 | 1  | 1  | 1  | 63.975 | 5.08 |          |           | 960000   | 2.29   |
| Q921F4 | Heterogeneous nuclear ribonucleoprotein L-like OS=Mus musculus GN=Hnrnpll PE=1 SV=1     | 10.829103 | 4  | 7  | 4  | 64.084 | 5.85 | 6800000  |           | 4200000  | 27.60  |
| O08919 | Numb-like protein OS=Mus musculus GN=Numb1 PE=1 SV=3                                    | 4.6357616 | 2  | 5  | 2  | 64.09  | 8.82 | 2000000  | 270000    | 960000   | 14.66  |
| Q9CWX9 | Bifunctional purine biosynthesis protein PURH OS=Mus musculus GN=Atic PE=1 SV=2         | 2.8716216 | 1  | 1  | 1  | 64.177 | 6.76 |          |           | 1800000  | 2.88   |
| Q62073 | Mitogen-activated protein kinase kinase kinase 7 OS=Mus musculus GN=Map3k7 PE=1 SV=1    | 2.0725389 | 1  | 1  | 1  | 64.187 | 6.67 |          |           | 8400000  | 2.28   |
| Q8BP47 | Asparagine--tRNA ligase, cytoplasmic OS=Mus musculus GN=Nars PE=1 SV=2                  | 7.5134168 | 3  | 8  | 3  | 64.238 | 5.86 | 7800000  | 2000000   | 5600000  | 26.65  |
| Q60803 | TNF receptor-associated factor 3 OS=Mus musculus GN=Traf3 PE=1 SV=2                     | 4.4091711 | 2  | 2  | 2  | 64.252 | 8.05 | 910000   |           | 1100000  | 5.22   |
| O88910 | MAGUK p55 subfamily member 3 OS=Mus musculus GN=Mpp3 PE=1 SV=2                          | 13.556338 | 6  | 9  | 6  | 64.361 | 6.34 | 2000000  | 380000    | 1700000  | 28.44  |
| Q9D6Z1 | Nucleolar protein 56 OS=Mus musculus GN=Nop56 PE=1 SV=2                                 | 9.137931  | 4  | 8  | 4  | 64.424 | 9.14 | 5000000  |           | 3200000  | 21.90  |
| O08539 | Myc box-dependent-interacting protein 1 OS=Mus musculus GN=Bin1 PE=1 SV=1               | 27.55102  | 12 | 39 | 11 | 64.43  | 5.03 | 26000000 | 15000000  | 32000000 | 132.38 |
| P12035 | SWISS-PROT:P12035 Tax_id=9606 Gene_Symbol=KRT3 Keratin, type II c                       | 11.287758 | 11 | 35 | 1  | 64.465 | 6.48 |          |           | 670000   | 85.58  |

|        |                                                                                           |           |    |     |    |        |      |           |           |           |        |
|--------|-------------------------------------------------------------------------------------------|-----------|----|-----|----|--------|------|-----------|-----------|-----------|--------|
| Q61481 | Calcium/calmodulin-dependent 3',5'-cyclic nucleotide phosphodiesterase 1A OS=Mus musculus | 19.115044 | 8  | 20  | 7  | 64.487 | 5.97 | 4400000   | 2100000   | 4700000   | 61.64  |
| Q8BLE7 | Vesicular glutamate transporter 2 OS=Mus musculus GN=Slc17a6 PE=1 SV=1                    | 5.4982818 | 4  | 14  | 3  | 64.519 | 6.68 | 6400000   | 1500000   | 4700000   | 44.84  |
| Q8C078 | Calcium/calmodulin-dependent protein kinase kinase 2 OS=Mus musculus GN=Camkk2 F          | 4.0816327 | 2  | 2   | 2  | 64.576 | 5.9  |           |           | 1000000   | 5.11   |
| Q05CL8 | La-related protein 7 OS=Mus musculus GN=Larp7 PE=1 SV=2                                   | 2.1052632 | 1  | 1   | 1  | 64.762 | 9.54 |           |           | 1200000   | 2.95   |
| Q9D824 | Pre-mRNA 3'-end-processing factor FIP1 OS=Mus musculus GN=Fip111 PE=1 SV=1                | 2.2375215 | 1  | 1   | 1  | 64.92  | 5.77 | 1600000   |           |           | 3.28   |
| Q9CWL8 | Beta-catenin-like protein 1 OS=Mus musculus GN=Ctnnb1 PE=1 SV=1                           | 2.8419183 | 1  | 1   | 1  | 64.939 | 5.07 | 2200000   |           |           | 3.52   |
| Q8R366 | Immunoglobulin superfamily member 8 OS=Mus musculus GN=Igsf8 PE=1 SV=2                    | 14.238953 | 6  | 18  | 6  | 64.97  | 7.99 | 17000000  | 9800000   | 9200000   | 61.00  |
| P97390 | Vacuolar protein sorting-associated protein 45 OS=Mus musculus GN=Vps45 PE=1 SV=1         | 7.5438596 | 4  | 6   | 4  | 65.012 | 8.25 | 1500000   | 8100000   | 1300000   | 15.47  |
| Q61490 | CD166 antigen OS=Mus musculus GN=Alcam PE=1 SV=3                                          | 19.210978 | 8  | 20  | 8  | 65.051 | 6.15 | 11000000  | 13000000  | 23000000  | 57.05  |
| P48320 | Glutamate decarboxylase 2 OS=Mus musculus GN=Gad2 PE=1 SV=1                               | 3.5897436 | 2  | 3   | 1  | 65.181 | 6.9  |           | 2900000   | 7200000   | 10.04  |
| O88291 | DBIRD complex subunit ZNF326 OS=Mus musculus GN=Znf326 PE=1 SV=1                          | 7.9310345 | 3  | 3   | 3  | 65.185 | 5.19 | 2300000   |           | 4700000   | 8.34   |
| Q68EF6 | Brain-enriched guanylate kinase-associated protein OS=Mus musculus GN=Begain PE=1         | 2.8333333 | 1  | 2   | 1  | 65.269 | 5.87 | 1000000   |           | 7200000   | 7.06   |
| Q91W39 | Nuclear receptor coactivator 5 OS=Mus musculus GN=Ncoa5 PE=1 SV=1                         | 2.0725389 | 1  | 2   | 1  | 65.28  | 9.82 | 1800000   |           | 1300000   | 4.02   |
| Q76MZ3 | Serine/threonine-protein phosphatase 2A 65 kDa regulatory subunit A alpha isoform OS=     | 27.164686 | 12 | 31  | 12 | 65.281 | 5.11 | 24000000  | 9000000   | 17000000  | 93.05  |
| Q8VHR5 | Transcriptional repressor p66-beta OS=Mus musculus GN=Gatad2b PE=1 SV=1                   | 2.1885522 | 1  | 2   | 1  | 65.37  | 9.7  | 1100000   |           |           | 5.59   |
| Q8R3Z5 | Voltage-dependent L-type calcium channel subunit beta-1 OS=Mus musculus GN=Cacnb          | 6.5326633 | 4  | 7   | 1  | 65.446 | 6.62 |           |           | 8100000   | 18.22  |
| Q8BK03 | Mitoguardin-2 OS=Mus musculus GN=Fam73b PE=1 SV=1                                         | 2.529511  | 1  | 1   | 1  | 65.506 | 5.41 | 730000    |           |           | 3.12   |
| Q80UG5 | Septin-9 OS=Mus musculus GN=Sept9 PE=1 SV=1                                               | 17.667238 | 9  | 16  | 9  | 65.534 | 8.9  | 5200000   | 3500000   | 4200000   | 44.29  |
| Q8JZW4 | Copine-5 OS=Mus musculus GN=Cpne5 PE=1 SV=1                                               | 3.5413153 | 2  | 3   | 1  | 65.551 | 5.77 |           |           | 5100000   | 6.81   |
| Q9Z1M8 | Protein Red OS=Mus musculus GN=Ik PE=1 SV=2                                               | 3.4111311 | 2  | 3   | 2  | 65.576 | 6.64 | 1300000   |           | 1000000   | 6.90   |
| Q6PD16 | Ubiquitin carboxyl-terminal hydrolase MINDY-2 OS=Mus musculus GN=Fam63b PE=1 SV           | 2.4958403 | 1  | 2   | 1  | 65.596 | 4.63 | 940000    |           | 9400000   | 6.75   |
| Q9WUA2 | Phenylalanine--tRNA ligase beta subunit OS=Mus musculus GN=Farsh PE=1 SV=2                | 7.3005093 | 4  | 6   | 4  | 65.655 | 7.12 | 2700000   |           | 9900000   | 15.04  |
| P35908 | SWISS-PROT:P35908 Tax_Id=9606 Gene_Symbol=KRT2 Keratin, type II c x                       | 62.015504 | 45 | 216 | 30 | 65.825 | 8    | 300000000 | 420000000 | 690000000 | 680.78 |
| Q80WT0 | Junctophilin-4 OS=Mus musculus GN=Jph4 PE=2 SV=1                                          | 2.5477707 | 1  | 2   | 1  | 65.96  | 6.71 | 750000    |           |           | 6.15   |
| P04264 | SWISS-PROT:P04264 Tax_Id=9606 Gene_Symbol=KRT1 Keratin, type II c x                       | 63.198758 | 46 | 250 | 37 | 65.978 | 8.12 | 650000000 | 430000000 | 1.6E+09   | 757.71 |
| Q8R4F1 | Netrin-G2 OS=Mus musculus GN=Ntng2 PE=1 SV=2                                              | 2.37691   | 1  | 1   | 1  | 66.122 | 6.13 |           | 1000000   |           | 2.03   |
| Q2M3X8 | Phosphatase and actin regulator 1 OS=Mus musculus GN=Phactr1 PE=1 SV=1                    | 11.896552 | 5  | 12  | 5  | 66.245 | 6.96 | 3900000   | 1100000   | 3300000   | 36.02  |
| O88342 | WD repeat-containing protein 1 OS=Mus musculus GN=Wdr1 PE=1 SV=3                          | 32.178218 | 14 | 30  | 14 | 66.365 | 6.6  | 13000000  | 6000000   | 12000000  | 75.82  |
| P50427 | Steryl-sulfatase OS=Mus musculus GN=Sts PE=1 SV=1                                         | 1.7628205 | 1  | 1   | 1  | 66.549 | 8.5  |           | 150000000 |           | 2.14   |
| Q8QZY1 | Eukaryotic translation initiation factor 3 subunit L OS=Mus musculus GN=Eif3l PE=1 SV=1   | 11.347518 | 5  | 10  | 5  | 66.57  | 6.44 | 2700000   | 1100000   | 1900000   | 29.67  |
| P48318 | Glutamate decarboxylase 1 OS=Mus musculus GN=Gad1 PE=1 SV=2                               | 9.9494098 | 5  | 8   | 4  | 66.605 | 7.17 | 4800000   |           | 4200000   | 23.62  |
| O88448 | Kinesin light chain 2 OS=Mus musculus GN=Klc2 PE=1 SV=1                                   | 11.352254 | 6  | 10  | 5  | 66.621 | 7.21 | 1400000   |           | 1400000   | 27.42  |
| Q92511 | ATPase family AAA domain-containing protein 3 OS=Mus musculus GN=Atad3 PE=1 SV=           | 9.6446701 | 6  | 9   | 6  | 66.701 | 9.29 | 1900000   | 1300000   | 1200000   | 20.60  |
| Q9Z0X1 | Apoptosis-inducing factor 1, mitochondrial OS=Mus musculus GN=Aifm1 PE=1 SV=1             | 18.137255 | 8  | 17  | 8  | 66.724 | 9.17 | 7300000   | 3800000   | 3700000   | 58.21  |
| P14733 | Lamin-B1 OS=Mus musculus GN=Lmnb1 PE=1 SV=3                                               | 49.14966  | 28 | 66  | 24 | 66.745 | 5.16 | 11000000  | 3000000   | 8000000   | 183.42 |
| Q3TY86 | Apoptosis-inducing factor 3 OS=Mus musculus GN=Aifm3 PE=1 SV=1                            | 1.4876033 | 1  | 1   | 1  | 66.75  | 9.04 |           |           | 6700000   | 2.65   |
| Q68FL4 | Putative adenosylhomocysteinase 3 OS=Mus musculus GN=Ahcyl2 PE=1 SV=1                     | 18.433931 | 10 | 37  | 1  | 66.857 | 7.36 | 6100000   | 2000000   | 5100000   | 98.46  |
| Q9EP69 | Phosphatidylinositol phosphatase SAC1 OS=Mus musculus GN=Sacm1 PE=1 SV=1                  | 4.4293015 | 3  | 8   | 3  | 66.901 | 7.3  | 3600000   | 920000    | 2000000   | 17.98  |
| Q68ED7 | CREB-regulated transcription coactivator 1 OS=Mus musculus GN=Crtc1 PE=1 SV=1             | 4.7619048 | 1  | 1   | 1  | 66.904 | 6.05 |           | 330000    |           | 2.62   |
| P31648 | Sodium- and chloride-dependent GABA transporter 1 OS=Mus musculus GN=Slc6a1 PE=           | 11.853088 | 4  | 16  | 4  | 66.957 | 7.96 | 21000000  | 9700000   | 15000000  | 58.17  |
| Q8BY18 | Protein FAM234B OS=Mus musculus GN=Fam234b PE=1 SV=1                                      | 7.6923077 | 3  | 6   | 3  | 66.989 | 5.03 | 2200000   | 450000    | 820000    | 21.34  |
| Q924K8 | Metastasis-associated protein MTA3 OS=Mus musculus GN=Mta3 PE=1 SV=1                      | 2.8764805 | 1  | 1   | 1  | 67.035 | 8.88 | 2000000   |           |           | 4.78   |
| Q8BMF3 | NADP-dependent malic enzyme, mitochondrial OS=Mus musculus GN=Me3 PE=1 SV=2               | 4.8013245 | 2  | 3   | 2  | 67.056 | 7.83 | 1800000   |           | 1400000   | 6.90   |
| P17141 | Zinc finger protein 37 OS=Mus musculus GN=Zfp37 PE=2 SV=4                                 | 2.6936027 | 1  | 1   | 1  | 67.184 | 8.82 |           |           |           | 2.76   |
| P35564 | Calnexin OS=Mus musculus GN=Canx PE=1 SV=1                                                | 27.411168 | 15 | 49  | 15 | 67.236 | 4.64 | 53000000  | 20000000  | 39000000  | 149.83 |
| P61222 | ATP-binding cassette sub-family E member 1 OS=Mus musculus GN=Abce1 PE=1 SV=1             | 2.0033389 | 1  | 1   | 1  | 67.271 | 8.34 | 4000000   |           |           | 2.82   |
| P21619 | Lamin-B2 OS=Mus musculus GN=Lmnb2 PE=1 SV=2                                               | 34.731544 | 20 | 49  | 16 | 67.277 | 5.5  | 11000000  | 3900000   | 11000000  | 141.65 |
| Q9QZM0 | Ubiquilin-2 OS=Mus musculus GN=Ubqln2 PE=1 SV=2                                           | 7.9937304 | 4  | 7   | 3  | 67.308 | 5.22 | 1700000   | 1300000   | 1300000   | 19.27  |

|          |                                                                                                                                   |           |    |     |    |        |      |          |          |           |         |
|----------|-----------------------------------------------------------------------------------------------------------------------------------|-----------|----|-----|----|--------|------|----------|----------|-----------|---------|
| Q80YN3   | Breast carcinoma-amplified sequence 1 homolog OS=Mus musculus GN=Bcas1 PE=1 SV=1                                                  | 7.2669826 | 3  | 7   | 3  | 67.336 | 6.21 | 690000   | 110000   | 910000    | 19.42   |
| O88559   | Menin OS=Mus musculus GN=Men1 PE=1 SV=2                                                                                           | 2.6186579 | 1  | 1   | 1  | 67.458 | 6.39 | 280000   |          |           | 2.84    |
| Q9ET30   | Transmembrane 9 superfamily member 3 OS=Mus musculus GN=Tm9sf3 PE=1 SV=1                                                          | 2.5553663 | 1  | 1   | 1  | 67.5   | 7.21 | 2600000  |          |           | 2.65    |
| O08599   | Syntaxin-binding protein 1 OS=Mus musculus GN=Stxbp1 PE=1 SV=2                                                                    | 53.198653 | 31 | 184 | 31 | 67.526 | 6.96 | 20000000 | 94000000 | 180000000 | 584.11  |
| P04627   | Serine/threonine-protein kinase A-Raf OS=Mus musculus GN=Araf PE=1 SV=2                                                           | 3.6423841 | 2  | 3   | 2  | 67.538 | 9.11 | 1500000  | 780000   |           | 6.64    |
| Q9CZW5   | Mitochondrial import receptor subunit TOM70 OS=Mus musculus GN=Tomm70 PE=1 SV=1                                                   | 22.094926 | 11 | 36  | 11 | 67.547 | 7.53 | 20000000 | 8200000  | 17000000  | 100.52  |
| P40142   | Transketolase OS=Mus musculus GN=Tkt PE=1 SV=1                                                                                    | 27.126806 | 14 | 32  | 14 | 67.588 | 7.5  | 9600000  | 2800000  | 6700000   | 95.36   |
| Q9R069   | Basal cell adhesion molecule OS=Mus musculus GN=Bcam PE=1 SV=1                                                                    | 4.5016077 | 2  | 3   | 2  | 67.628 | 6.25 | 2100000  |          | 1000000   | 9.21    |
| Q02956   | Protein kinase C zeta type OS=Mus musculus GN=Prkcz PE=1 SV=2                                                                     | 2.3648649 | 1  | 1   | 1  | 67.639 | 5.76 |          |          | 250000    | 2.71    |
| P26041   | Moesin OS=Mus musculus GN=Msn PE=1 SV=3                                                                                           | 11.785095 | 7  | 12  | 3  | 67.725 | 6.6  | 3900000  | 630000   | 1100000   | 30.66   |
| Q99MN1   | Lysine--tRNA ligase OS=Mus musculus GN=Kars PE=1 SV=1                                                                             | 7.5630252 | 2  | 2   | 2  | 67.796 | 5.94 |          | 930000   |           | 6.85    |
| Q8BMF4   | Dihydrolipoyllysine-residue acetyltransferase component of pyruvate dehydrogenase complex OS=Mus musculus GN=Nploc4 PE=1 SV=1     | 19.937695 | 10 | 31  | 10 | 67.899 | 8.57 | 35000000 | 30000000 | 40000000  | 87.46   |
| P60670   | Nuclear protein localization protein 4 homolog OS=Mus musculus GN=Nploc4 PE=1 SV=1                                                | 1.4802632 | 1  | 1   | 1  | 67.974 | 6.46 |          |          | 970000    | 2.15    |
| Q9WU79   | Proline dehydrogenase 1, mitochondrial OS=Mus musculus GN=Prodh PE=1 SV=2                                                         | 2.0033389 | 1  | 2   | 1  | 67.993 | 8.24 |          | 530000   | 1100000   | 4.61    |
| Q921G7   | Electron transfer flavoprotein-ubiquinone oxidoreductase, mitochondrial OS=Mus musculus GN=Uqcrc1 PE=1 SV=1                       | 13.798701 | 8  | 19  | 8  | 68.048 | 7.58 | 5400000  | 3200000  | 5300000   | 50.60   |
| Q8BL65   | Actin-binding LIM protein 2 OS=Mus musculus GN=Ablim2 PE=1 SV=1                                                                   | 16.666667 | 8  | 16  | 8  | 68.063 | 8.02 | 5300000  | 930000   | 4400000   | 49.26   |
| P15636   | SWISS-PROT:P15636 Protease I precursor Lysyl endopeptidase Achromotaxin OS=Mus musculus GN=Lysyl PE=1 SV=1                        | 21.592649 | 11 | 278 | 11 | 68.083 | 7.24 | 4.3E+09  | 2E+09    | 4.5E+09   | 1080.03 |
| Q62074   | Protein kinase C iota type OS=Mus musculus GN=Prkci PE=1 SV=3                                                                     | 2.6890756 | 1  | 1   | 1  | 68.159 | 5.85 | 1200000  |          |           | 2.29    |
| P50516   | V-type proton ATPase catalytic subunit A OS=Mus musculus GN=Atp6v1a PE=1 SV=2                                                     | 40.356564 | 22 | 86  | 22 | 68.283 | 5.58 | 49000000 | 28000000 | 50000000  | 242.98  |
| O88487   | Cytoplasmic dynein 1 intermediate chain 2 OS=Mus musculus GN=Dync1i2 PE=1 SV=1                                                    | 11.111111 | 4  | 14  | 4  | 68.352 | 5.29 | 9200000  | 4800000  | 7400000   | 53.40   |
| Q52KF3   | Protein spire homolog 1 OS=Mus musculus GN=Spire1 PE=1 SV=1                                                                       | 5.0167224 | 2  | 3   | 2  | 68.407 | 9.01 | 1200000  |          | 1300000   | 9.72    |
| P35235   | Tyrosine-protein phosphatase non-receptor type 11 OS=Mus musculus GN=Ptpn11 PE=1 SV=1                                             | 8.3752094 | 4  | 6   | 4  | 68.417 | 7.3  | 710000   | 300000   | 1100000   | 14.54   |
| Q99KN9   | Clathrin interactor 1 OS=Mus musculus GN=Clint1 PE=1 SV=2                                                                         | 4.9128368 | 2  | 4   | 2  | 68.469 | 6.25 | 3900000  |          | 2600000   | 12.70   |
| Q91YQ5   | Dolichyl-diphosphooligosaccharide--protein glycosyltransferase subunit 1 OS=Mus musculus GN=Dolichyl PE=1 SV=1                    | 19.407895 | 10 | 23  | 10 | 68.486 | 6.46 | 9400000  | 4100000  | 6300000   | 60.73   |
| Q91WJ8   | Far upstream element-binding protein 1 OS=Mus musculus GN=Fubp1 PE=1 SV=1                                                         | 3.0721966 | 1  | 2   | 1  | 68.497 | 7.93 |          | 250000   |           | 5.97    |
| P07724   | Serum albumin OS=Mus musculus GN=Alb PE=1 SV=3                                                                                    | 26.973684 | 12 | 37  | 12 | 68.648 | 6.07 | 7500000  | 7100000  | 8400000   | 99.87   |
| Q8JZN5   | Acyl-CoA dehydrogenase family member 9, mitochondrial OS=Mus musculus GN=Acad9 PE=1 SV=1                                          | 11.68     | 7  | 14  | 7  | 68.679 | 7.46 | 5500000  | 2300000  | 2500000   | 33.01   |
| P36916   | Guanine nucleotide-binding protein-like 1 OS=Mus musculus GN=Gnl1 PE=1 SV=4                                                       | 4.9423394 | 3  | 4   | 3  | 68.729 | 5.68 | 2000000  |          | 1500000   | 8.75    |
| Q8BGD9   | Eukaryotic translation initiation factor 4B OS=Mus musculus GN=Eif4b PE=1 SV=1                                                    | 8.1833061 | 5  | 9   | 5  | 68.799 | 5.67 | 4500000  | 820000   | 5500000   | 27.42   |
| P35922   | Synaptic functional regulator FMR1 OS=Mus musculus GN=Fmr1 PE=1 SV=1                                                              | 7.8175896 | 4  | 8   | 3  | 68.947 | 7.62 | 2300000  | 540000   | 1600000   | 22.51   |
| P24527   | Leukotriene A-4 hydrolase OS=Mus musculus GN=Lta4h PE=1 SV=4                                                                      | 2.1276596 | 1  | 1   | 1  | 69.007 | 6.42 | 950000   |          |           | 1.81    |
| Q3UHK1   | Proton myo-inositol cotransporter OS=Mus musculus GN=Slc2a13 PE=1 SV=2                                                            | 6.9073783 | 3  | 6   | 3  | 69.018 | 6.86 | 3900000  | 1700000  | 600000    | 17.84   |
| Q9DBG6   | Dolichyl-diphosphooligosaccharide--protein glycosyltransferase subunit 2 OS=Mus musculus GN=Dolichyl PE=1 SV=1                    | 7.1315372 | 3  | 5   | 3  | 69.02  | 5.81 | 4400000  | 2900000  | 3600000   | 17.05   |
| Q8JZN7   | Mitochondrial Rho GTPase 2 OS=Mus musculus GN=Rhot2 PE=1 SV=1                                                                     | 4.0322581 | 2  | 3   | 1  | 69.027 | 6    | 1500000  |          |           | 6.59    |
| Q9D1T0   | Leucine-rich repeat and immunoglobulin-like domain-containing nogo receptor-interacting protein OS=Mus musculus GN=Nogo PE=1 SV=1 | 14.820847 | 7  | 17  | 7  | 69.057 | 8.31 | 4500000  | 2000000  | 3000000   | 53.28   |
| Q9JHS4   | ATP-dependent Clp protease ATP-binding subunit clpX-like, mitochondrial OS=Mus musculus GN=ClpX PE=1 SV=1                         | 2.0504732 | 1  | 1   | 1  | 69.186 | 7.71 |          |          | 760000    | 2.11    |
| P20917   | Myelin-associated glycoprotein OS=Mus musculus GN=Mag PE=1 SV=2                                                                   | 7.827476  | 4  | 10  | 4  | 69.216 | 5.1  | 3400000  | 4000000  | 6100000   | 27.14   |
| Q61656   | Probable ATP-dependent RNA helicase DDX5 OS=Mus musculus GN=Ddx5 PE=1 SV=2                                                        | 30.29316  | 20 | 40  | 14 | 69.247 | 8.92 | 17000000 | 1600000  | 10000000  | 100.98  |
| P02769   | SWISS-PROT:P02769 (Bos taurus) Bovine serum albumin precursor GN=Alb PE=1 SV=1                                                    | 7.7429984 | 4  | 4   | 4  | 69.248 | 6.18 |          | 410000   | 2900000   | 8.97    |
| P02768-1 | SWISS-PROT:P02768-1 Tax_id=9606 Gene_Symbol=ALB Isoform 1 of Serum albumin OS=Mus musculus GN=Alb PE=1 SV=1                       | 9.3596059 | 5  | 9   | 5  | 69.321 | 6.28 | 2500000  | 1200000  | 1000000   | 20.55   |
| P26040   | Ezrin OS=Mus musculus GN=Ezr PE=1 SV=3                                                                                            | 10.068259 | 6  | 17  | 1  | 69.364 | 6.1  | 4400000  | 2000000  | 4400000   | 45.63   |
| Q8C2Q3   | RNA-binding protein 14 OS=Mus musculus GN=Rbm14 PE=1 SV=1                                                                         | 4.3348281 | 3  | 5   | 3  | 69.406 | 9.67 | 1800000  |          | 1000000   | 11.14   |
| Q8R361   | Rab11 family-interacting protein 5 OS=Mus musculus GN=Rab11fip5 PE=1 SV=2                                                         | 6.3565891 | 3  | 9   | 3  | 69.51  | 9.07 | 1500000  | 52000    | 890000    | 26.27   |
| Q7TMK9   | Heterogeneous nuclear ribonucleoprotein Q OS=Mus musculus GN=Syncrip PE=1 SV=2                                                    | 13.001605 | 7  | 16  | 7  | 69.59  | 8.59 | 10000000 | 2100000  | 5500000   | 34.65   |
| P17156   | Heat shock-related 70 kDa protein 2 OS=Mus musculus GN=Hspa2 PE=1 SV=2                                                            | 33.333333 | 20 | 75  | 8  | 69.599 | 5.67 | 6900000  | 4400000  | 4900000   | 228.59  |
| Q923D5   | WW domain-binding protein 11 OS=Mus musculus GN=Wbp11 PE=1 SV=2                                                                   | 2.6521061 | 1  | 2   | 1  | 69.831 | 8.4  | 1600000  |          | 410000    | 4.92    |
| Q8K012   | Formin-binding protein 1-like OS=Mus musculus GN=Fbnp1 PE=1 SV=2                                                                  | 6.2809917 | 3  | 4   | 3  | 69.842 | 6.64 | 1800000  |          | 4100000   | 10.45   |
| Q8CCJ4   | APC membrane recruitment protein 2 OS=Mus musculus GN=Amer2 PE=1 SV=2                                                             | 8.1845238 | 2  | 2   | 2  | 69.89  | 6.64 | 1200000  |          | 510000    | 6.72    |

|        |                                                                                            |           |    |     |    |        |      |           |          |           |        |
|--------|--------------------------------------------------------------------------------------------|-----------|----|-----|----|--------|------|-----------|----------|-----------|--------|
| P31650 | Sodium- and chloride-dependent GABA transporter 3 OS=Mus musculus GN=Slc6a11 PE=1 SV=1     | 8.6124402 | 5  | 16  | 5  | 69.914 | 6.98 | 2000000   | 8700000  | 16000000  | 50.21  |
| Q8BZR9 | Nuclear cap-binding protein subunit 3 OS=Mus musculus GN=Ncbp3 PE=1 SV=1                   | 2.1138211 | 1  | 2   | 1  | 70     | 5.8  | 460000    |          |           | 6.58   |
| Q9EPR4 | Solute carrier family 23 member 2 OS=Mus musculus GN=Slc23a2 PE=1 SV=2                     | 2.6234568 | 1  | 3   | 1  | 70.003 | 7.5  | 1600000   | 390000   | 830000    | 10.22  |
| P17879 | Heat shock 70 kDa protein 1B OS=Mus musculus GN=Hspa1b PE=1 SV=3                           | 19.626168 | 11 | 33  | 6  | 70.133 | 5.72 | 5400000   | 3300000  | 5200000   | 100.98 |
| Q99JP7 | Gamma-glutamyltransferase 7 OS=Mus musculus GN=Ggt7 PE=1 SV=2                              | 7.7039275 | 3  | 6   | 3  | 70.208 | 5.06 | 3800000   | 1800000  | 4200000   | 19.78  |
| Q8C8N2 | Protein SCAI OS=Mus musculus GN=Scai PE=1 SV=2                                             | 4.950495  | 2  | 3   | 2  | 70.231 | 8.6  | 6000000   | 1500000  | 2400000   | 8.93   |
| Q8CAA7 | Glucose 1,6-bisphosphate synthase OS=Mus musculus GN=Pgm21i PE=1 SV=1                      | 5.6360709 | 3  | 5   | 3  | 70.234 | 6.49 | 1100000   |          | 1100000   | 9.68   |
| Q8R555 | Cartilage acidic protein 1 OS=Mus musculus GN=Crtac1 PE=2 SV=1                             | 3.250774  | 1  | 2   | 1  | 70.28  | 5.14 | 2900000   |          | 1100000   | 8.21   |
| Q14B80 | Potassium voltage-gated channel subfamily C member 2 OS=Mus musculus GN=Kcnc2 F            | 2.3364486 | 1  | 2   | 1  | 70.458 | 7.69 | 1100000   |          | 930000    | 5.15   |
| P59016 | Vacuolar protein sorting-associated protein 33B OS=Mus musculus GN=Vps33b PE=1 SV=1        | 3.0794165 | 1  | 2   | 1  | 70.481 | 6.86 | 1700000   |          | 980000    | 6.77   |
| Q8BH04 | Phosphoenolpyruvate carboxykinase [GTP], mitochondrial OS=Mus musculus GN=Pck2 F           | 1.875     | 1  | 2   | 1  | 70.482 | 7.28 | 1200000   |          | 920000    | 6.15   |
| Q9Z1F9 | SUMO-activating enzyme subunit 2 OS=Mus musculus GN=Uba2 PE=1 SV=1                         | 4.8589342 | 2  | 2   | 2  | 70.525 | 5.24 | 1700000   |          |           | 7.51   |
| Q8BMA6 | Signal recognition particle subunit SRP68 OS=Mus musculus GN=Srp68 PE=1 SV=2               | 7.36      | 3  | 4   | 3  | 70.53  | 8.57 | 1700000   |          | 890000    | 9.36   |
| Q9Z0V2 | Potassium voltage-gated channel subfamily D member 2 OS=Mus musculus GN=Kcnd2 F            | 8.2539683 | 3  | 6   | 3  | 70.531 | 8.07 | 1800000   |          | 1100000   | 18.87  |
| O54865 | Guanylate cyclase soluble subunit beta-1 OS=Mus musculus GN=Gucy1b3 PE=1 SV=1              | 15.967742 | 8  | 14  | 8  | 70.553 | 5.31 | 5300000   | 940000   | 3500000   | 36.77  |
| P29341 | Polyadenylate-binding protein 1 OS=Mus musculus GN=Pabpc1 PE=1 SV=2                        | 11.006289 | 6  | 12  | 6  | 70.626 | 9.5  | 5900000   | 1200000  | 4000000   | 31.55  |
| O88485 | Cytoplasmic dynein 1 intermediate chain 1 OS=Mus musculus GN=Dync1i1 PE=1 SV=2             | 13.375796 | 7  | 18  | 7  | 70.681 | 5.12 | 4000000   | 3800000  | 5100000   | 57.70  |
| Q7TNG5 | Echinoderm microtubule-associated protein-like 2 OS=Mus musculus GN=Eml2 PE=1 SV=1         | 1.540832  | 1  | 1   | 1  | 70.689 | 6.28 | 2100000   |          |           | 1.99   |
| Q99K51 | Plastin-3 OS=Mus musculus GN=Pls3 PE=1 SV=3                                                | 4.1269841 | 1  | 2   | 1  | 70.697 | 5.62 | 950000    | 350000   |           | 5.08   |
| P47934 | Carnitine O-acetyltransferase OS=Mus musculus GN=Crat PE=1 SV=3                            | 2.3961661 | 1  | 3   | 1  | 70.794 | 8.44 | 2500000   | 1200000  | 2100000   | 11.36  |
| P63017 | Heat shock cognate 71 kDa protein OS=Mus musculus GN=Hspa8 PE=1 SV=1                       | 47.678019 | 32 | 168 | 21 | 70.827 | 5.52 | 140000000 | 86000000 | 150000000 | 540.48 |
| P50544 | Very long-chain specific acyl-CoA dehydrogenase, mitochondrial OS=Mus musculus GN=         | 8.0792683 | 4  | 6   | 4  | 70.831 | 8.75 | 1100000   | 720000   | 1300000   | 16.65  |
| P69566 | Ran-binding protein 9 OS=Mus musculus GN=Ranbp9 PE=1 SV=1                                  | 3.9816233 | 2  | 2   | 2  | 70.967 | 6.84 | 790000    |          | 1600000   | 4.91   |
| Q6ZPU9 | KIF1-binding protein OS=Mus musculus GN=Kif1bp PE=1 SV=2                                   | 4.8622366 | 1  | 1   | 1  | 71.007 | 5.48 |           |          |           | 3.90   |
| Q6PGE7 | Sodium-dependent proline transporter OS=Mus musculus GN=Slc6a7 PE=1 SV=1                   | 3.7676609 | 2  | 3   | 2  | 71.019 | 6.61 | 2600000   |          | 2200000   | 6.40   |
| Q91X11 | tRNA-dihydrouridine(47) synthase [NAD(P)(+)]-like OS=Mus musculus GN=Dus3l PE=1 SV=1       | 2.9827316 | 1  | 1   | 1  | 71.033 | 7.97 |           |          | 200000    | 2.78   |
| Q9JJY3 | Sphingomyelin phosphodiesterase 3 OS=Mus musculus GN=Smpd3 PE=1 SV=1                       | 3.3587786 | 1  | 3   | 1  | 71.152 | 5.88 | 3800000   | 1500000  | 3600000   | 13.71  |
| Q60714 | Long-chain fatty acid transport protein 1 OS=Mus musculus GN=Slc27a1 PE=1 SV=1             | 1.8575851 | 1  | 1   | 1  | 71.231 | 8.38 | 1100000   |          |           | 2.97   |
| Q9R0L7 | A-kinase anchor protein 8-like OS=Mus musculus GN=Akap8l PE=1 SV=1                         | 4.0498442 | 2  | 4   | 2  | 71.408 | 5.05 | 3100000   |          | 820000    | 11.53  |
| Q8R349 | Cell division cycle protein 16 homolog OS=Mus musculus GN=Cdc16 PE=1 SV=1                  | 2.5806452 | 1  | 1   | 1  | 71.414 | 5.76 |           |          | 1000000   | 2.96   |
| Q91YM4 | Protein TBRG4 OS=Mus musculus GN=Tbrg4 PE=1 SV=1                                           | 1.2698413 | 1  | 1   | 1  | 71.468 | 8.34 |           | 260000   |           | 1.95   |
| Q7M6Y3 | Phosphatidylinositol-binding clathrin assembly protein OS=Mus musculus GN=Picalm PE=1 SV=1 | 3.3333333 | 2  | 5   | 1  | 71.498 | 7.91 | 1400000   | 1000000  |           | 16.73  |
| Q60722 | Transcription factor 4 OS=Mus musculus GN=Tcf4 PE=1 SV=1                                   | 2.3880597 | 1  | 2   | 1  | 71.58  | 7.17 | 350000    |          | 390000    | 5.44   |
| Q99LE6 | ATP-binding cassette sub-family F member 2 OS=Mus musculus GN=Abcf2 PE=1 SV=1              | 1.5923567 | 1  | 2   | 1  | 71.736 | 7.05 | 2800000   |          | 1400000   | 4.42   |
| Q99PD7 | Sodium/potassium/calcium exchanger 3 OS=Mus musculus GN=Slc24a3 PE=1 SV=3                  | 4.1860465 | 2  | 3   | 2  | 71.895 | 5.07 | 210000    |          | 160000    | 7.93   |
| P08003 | Protein disulfide-isomerase A4 OS=Mus musculus GN=Pdia4 PE=1 SV=3                          | 9.4043887 | 4  | 10  | 4  | 71.938 | 5.31 | 2600000   | 860000   | 2500000   | 27.32  |
| Q8CH72 | E3 ubiquitin-protein ligase TRIM32 OS=Mus musculus GN=Trim32 PE=1 SV=2                     | 1.6793893 | 1  | 1   | 1  | 72.011 | 6.9  |           |          | 2300000   | 3.22   |
| Q61550 | Double-strand-break repair protein rad21 homolog OS=Mus musculus GN=Rad21 PE=1 SV=1        | 8.1889764 | 3  | 4   | 3  | 72.038 | 4.64 | 1100000   |          | 1000000   | 12.68  |
| Q8BG51 | Mitochondrial Rho GTPase 1 OS=Mus musculus GN=Rhot1 PE=1 SV=1                              | 9.5087163 | 4  | 7   | 3  | 72.196 | 6.49 | 4500000   | 1400000  | 1600000   | 19.75  |
| P70663 | SPARC-like protein 1 OS=Mus musculus GN=Sparcl1 PE=1 SV=3                                  | 22.153846 | 11 | 32  | 11 | 72.243 | 4.6  | 3100000   | 2000000  | 4400000   | 106.45 |
| O08582 | GTP-binding protein 1 OS=Mus musculus GN=Gtppb1 PE=1 SV=2                                  | 2.0958084 | 1  | 1   | 1  | 72.255 | 8.29 | 950000    |          |           | 2.64   |
| Q91VE0 | Long-chain fatty acid transport protein 4 OS=Mus musculus GN=Slc27a4 PE=1 SV=1             | 6.8429238 | 4  | 4   | 4  | 72.272 | 8.59 | 2300000   | 410000   | 2600000   | 10.47  |
| Q8BRF7 | Sec1 family domain-containing protein 1 OS=Mus musculus GN=Scfd1 PE=1 SV=1                 | 2.6604069 | 1  | 3   | 1  | 72.277 | 6.38 | 2400000   | 1100000  | 1700000   | 10.86  |
| Q501J6 | Probable ATP-dependent RNA helicase DDX17 OS=Mus musculus GN=Ddx17 PE=1 SV=1               | 20.615385 | 13 | 25  | 7  | 72.354 | 8.59 | 8600000   |          | 5000000   | 71.54  |
| O70161 | Phosphatidylinositol 4-phosphate 5-kinase type-1 gamma OS=Mus musculus GN=Pip5k1           | 12.556732 | 6  | 12  | 6  | 72.363 | 5.59 | 3900000   | 1000000  | 3600000   | 32.22  |
| P20029 | 78 kDa glucose-regulated protein OS=Mus musculus GN=Hspa5 PE=1 SV=3                        | 38.931298 | 21 | 71  | 19 | 72.377 | 5.16 | 3200000   | 2400000  | 3000000   | 231.21 |
| P97494 | Glutamate--cysteine ligase catalytic subunit OS=Mus musculus GN=Gclc PE=1 SV=4             | 4.5525903 | 2  | 4   | 2  | 72.525 | 5.9  | 970000    | 420000   | 650000    | 10.55  |
| Q8K2B3 | Succinate dehydrogenase [ubiquinone] flavoprotein subunit, mitochondrial OS=Mus musculus   | 17.46988  | 10 | 33  | 10 | 72.539 | 7.37 | 2700000   | 1500000  | 3200000   | 104.09 |

|        |                                                                                           |           |    |     |    |        |      |          |          |          |        |
|--------|-------------------------------------------------------------------------------------------|-----------|----|-----|----|--------|------|----------|----------|----------|--------|
| Q8BG40 | Katanin p80 WD40 repeat-containing subunit B1 OS=Mus musculus GN=Katnb1 PE=1 SV=1         | 4.8632219 | 2  | 3   | 2  | 72.593 | 7.27 | 960000   |          | 940000   | 9.92   |
| Q8R1X6 | Spartin OS=Mus musculus GN=Spg20 PE=1 SV=1                                                | 1.9374069 | 1  | 1   | 1  | 72.61  | 5.86 |          |          |          | 2.93   |
| Q03157 | Amyloid-like protein 1 OS=Mus musculus GN=Aplp1 PE=1 SV=1                                 | 1.8376723 | 1  | 2   | 1  | 72.705 | 5.67 | 1500000  | 880000   |          | 7.98   |
| O70551 | SRSF protein kinase 1 OS=Mus musculus GN=Sprk1 PE=1 SV=2                                  | 4.3209877 | 2  | 3   | 1  | 73.043 | 6.19 |          |          | 410000   | 7.59   |
| Q62167 | ATP-dependent RNA helicase DDX3X OS=Mus musculus GN=Ddx3x PE=1 SV=3                       | 13.444109 | 8  | 16  | 7  | 73.056 | 7.18 | 3100000  |          | 3300000  | 43.56  |
| Q9R049 | E3 ubiquitin-protein ligase AMFR OS=Mus musculus GN=Amfr PE=1 SV=2                        | 2.6438569 | 1  | 1   | 1  | 73.058 | 6.46 |          | 350000   |          | 1.89   |
| Q8BVL9 | Janus kinase and microtubule-interacting protein 1 OS=Mus musculus GN=Jakmip1 PE=1 SV=1   | 2.5559105 | 2  | 3   | 2  | 73.094 | 6.09 | 1700000  |          | 1700000  | 7.38   |
| Q5XG69 | Soluble lamin-associated protein of 75 kDa OS=Mus musculus GN=Fam169a PE=1 SV=3           | 14.736842 | 6  | 18  | 6  | 73.195 | 4.68 | 7400000  | 850000   | 6300000  | 63.22  |
| A2ALS5 | Rap1 GTPase-activating protein 1 OS=Mus musculus GN=Rap1gap PE=1 SV=2                     | 5.8823529 | 3  | 7   | 3  | 73.387 | 5.87 | 3500000  | 950000   | 3600000  | 22.07  |
| Q9Z0V1 | Potassium voltage-gated channel subfamily D member 3 OS=Mus musculus GN=Kcnd3 F           | 1.3740458 | 1  | 1   | 1  | 73.415 | 8.25 |          |          | 1400000  | 2.10   |
| P38647 | Stress-70 protein, mitochondrial OS=Mus musculus GN=Hspa9 PE=1 SV=3                       | 34.756996 | 21 | 56  | 21 | 73.416 | 6.07 | 15000000 | 11000000 | 15000000 | 185.97 |
| Q3TRR0 | Microtubule-associated protein 9 OS=Mus musculus GN=Map9 PE=1 SV=2                        | 9.1331269 | 3  | 4   | 3  | 73.466 | 7.62 | 600000   |          | 96000    | 9.96   |
| O88845 | A-kinase anchor protein 10, mitochondrial OS=Mus musculus GN=Akap10 PE=1 SV=3             | 5.7401813 | 2  | 2   | 2  | 73.586 | 6.79 | 450000   |          | 290000   | 5.33   |
| Q9WVR4 | Fragile X mental retardation syndrome-related protein 2 OS=Mus musculus GN=Fxr2 PE=1 SV=1 | 8.4695394 | 4  | 9   | 3  | 73.698 | 6.23 | 1400000  |          | 1400000  | 25.98  |
| Q8K3G9 | DCC-interacting protein 13-beta OS=Mus musculus GN=Appl2 PE=1 SV=1                        | 2.1148036 | 1  | 1   | 1  | 73.807 | 5.03 |          |          | 730000   | 3.04   |
| Q64336 | T-box brain protein 1 OS=Mus musculus GN=Tbr1 PE=1 SV=2                                   | 4.9926579 | 2  | 2   | 2  | 73.894 | 7.33 | 810000   |          |          | 5.51   |
| D3Z7P3 | Glutaminase kidney isoform, mitochondrial OS=Mus musculus GN=Gls PE=1 SV=1                | 26.261128 | 12 | 43  | 12 | 73.916 | 7.99 | 22000000 | 12000000 | 23000000 | 129.70 |
| O88935 | Synapsin-1 OS=Mus musculus GN=Syn1 PE=1 SV=2                                              | 52.691218 | 25 | 117 | 23 | 74.052 | 9.8  | 56000000 | 32000000 | 43000000 | 411.40 |
| Q66L44 | Voltage-dependent calcium channel beta subunit-associated regulatory protein OS=Mus r     | 1.8624642 | 1  | 2   | 1  | 74.086 | 6.33 |          | 450000   | 390000   | 5.66   |
| Q9DBC0 | Selenoprotein O OS=Mus musculus GN=Selo PE=1 SV=4                                         | 1.9490255 | 1  | 1   | 1  | 74.175 | 5.83 |          |          |          | 2.36   |
| P48678 | Prelamin-A/C OS=Mus musculus GN=Lmna PE=1 SV=2                                            | 42.105263 | 27 | 68  | 26 | 74.193 | 6.98 | 23000000 | 5500000  | 19000000 | 201.56 |
| Q3UMU9 | Hepatoma-derived growth factor-related protein 2 OS=Mus musculus GN=Hdgfrp2 PE=1 SV=1     | 4.9327354 | 3  | 3   | 3  | 74.246 | 8.66 | 71000    |          | 2300000  | 6.88   |
| Q3UHH2 | Solute carrier family 22 member 23 OS=Mus musculus GN=Slc22a23 PE=2 SV=1                  | 1.7416546 | 1  | 2   | 1  | 74.276 | 7.83 | 1000000  | 350000   |          | 4.59   |
| Q7TS72 | Inositol-trisphosphate 3-kinase C OS=Mus musculus GN=Itpkc PE=1 SV=1                      | 1.0324484 | 1  | 1   | 1  | 74.446 | 5.36 | 900000   |          |          | 1.89   |
| Q8BH59 | Calcium-binding mitochondrial carrier protein Aralar1 OS=Mus musculus GN=Slc25a12 P       | 32.644018 | 20 | 61  | 20 | 74.523 | 8.25 | 35000000 | 19000000 | 24000000 | 174.83 |
| Q8BH24 | Transmembrane 9 superfamily member 4 OS=Mus musculus GN=Tm9sf4 PE=1 SV=1                  | 6.6874028 | 3  | 4   | 3  | 74.644 | 7.23 | 880000   | 360000   |          | 10.01  |
| Q8R480 | Nuclear pore complex protein Nup85 OS=Mus musculus GN=Nup85 PE=1 SV=1                     | 1.5243902 | 1  | 1   | 1  | 74.728 | 5.57 |          |          |          | 1.80   |
| Q8K0U4 | Heat shock 70 kDa protein 12A OS=Mus musculus GN=Hspa12a PE=1 SV=1                        | 31.259259 | 18 | 53  | 18 | 74.825 | 6.77 | 21000000 | 8500000  | 17000000 | 160.80 |
| Q7TQF7 | Amphiphysin OS=Mus musculus GN=Amph PE=1 SV=1                                             | 34.402332 | 18 | 68  | 17 | 74.967 | 4.63 | 50000000 | 31000000 | 57000000 | 235.11 |
| Q62172 | RalA-binding protein 1 OS=Mus musculus GN=Ralbp1 PE=1 SV=4                                | 5.2469136 | 3  | 5   | 3  | 74.997 | 5.92 | 710000   |          | 620000   | 13.34  |
| Q61033 | Lamina-associated polypeptide 2, isoforms alpha/zeta OS=Mus musculus GN=Tmpo PE=1 SV=1    | 4.6176046 | 2  | 4   | 2  | 75.122 | 8.05 | 9000000  | 1000000  | 3300000  | 13.50  |
| Q8VBZ3 | Cleft lip and palate transmembrane protein 1 homolog OS=Mus musculus GN=Cipltm1 PE=1 SV=1 | 14.608434 | 5  | 11  | 5  | 75.243 | 6.3  | 1300000  | 700000   | 900000   | 32.65  |
| Q9Z2C4 | Myotubularin-related protein 1 OS=Mus musculus GN=Mtmr1 PE=1 SV=1                         | 4.9327354 | 3  | 4   | 3  | 75.266 | 6.8  | 1800000  |          | 960000   | 10.16  |
| Q8VIJ6 | Splicing factor, proline- and glutamine-rich OS=Mus musculus GN=Sfpq PE=1 SV=1            | 14.735336 | 9  | 35  | 9  | 75.394 | 9.44 | 21000000 | 6000000  | 14000000 | 99.39  |
| P55096 | ATP-binding cassette sub-family D member 3 OS=Mus musculus GN=Abcd3 PE=1 SV=2             | 2.124431  | 1  | 1   | 1  | 75.426 | 9.26 | 2800000  |          |          | 2.61   |
| P47708 | Rabphilin-3A OS=Mus musculus GN=Rph3a PE=1 SV=2                                           | 25.403818 | 12 | 35  | 12 | 75.442 | 8.27 | 7800000  | 3300000  | 5500000  | 112.89 |
| Q9Z2C9 | Myotubularin-related protein 7 OS=Mus musculus GN=Mtmr7 PE=1 SV=2                         | 2.4242424 | 1  | 1   | 1  | 75.56  | 6.43 | 590000   |          |          | 4.51   |
| Q9D019 | Arginine--tRNA ligase, cytoplasmic OS=Mus musculus GN=Rars PE=1 SV=2                      | 2.4242424 | 1  | 1   | 1  | 75.625 | 7.55 | 1900000  |          |          | 2.76   |
| P14824 | Annexin A6 OS=Mus musculus GN=Anxa6 PE=1 SV=3                                             | 29.123328 | 15 | 35  | 15 | 75.837 | 5.5  | 5300000  | 2500000  | 4400000  | 98.37  |
| Q8BH57 | WD repeat-containing protein 48 OS=Mus musculus GN=Wdr48 PE=1 SV=1                        | 9.9112426 | 5  | 11  | 5  | 75.959 | 7.17 | 2300000  | 810000   | 2400000  | 30.95  |
| Q8K2C7 | Protein OS-9 OS=Mus musculus GN=Os9 PE=1 SV=2                                             | 3.7202381 | 2  | 3   | 2  | 76.061 | 4.84 | 650000   | 910000   | 510000   | 9.51   |
| Q61584 | Fragile X mental retardation syndrome-related protein 1 OS=Mus musculus GN=Fxr1 PE=1 SV=1 | 6.7946824 | 3  | 5   | 2  | 76.175 | 6.98 | 1700000  |          | 2100000  | 13.40  |
| P10637 | Microtubule-associated protein tau OS=Mus musculus GN=Mapt PE=1 SV=3                      | 19.099591 | 9  | 25  | 9  | 76.197 | 6.79 | 14000000 | 5400000  | 10000000 | 68.75  |
| Q80X80 | C2 domain-containing protein 2-like OS=Mus musculus GN=C2cd2l PE=1 SV=3                   | 3.9660057 | 2  | 5   | 2  | 76.282 | 7.21 | 8700000  |          | 9600000  | 17.52  |
| P28571 | Sodium- and chloride-dependent glycine transporter 1 OS=Mus musculus GN=Slc6a9 PE=1 SV=1  | 3.1791908 | 1  | 3   | 1  | 76.494 | 7.81 | 2800000  | 1100000  | 1500000  | 6.38   |
| Q8C0L9 | Glycerophosphocholine phosphodiesterase GPCPD1 OS=Mus musculus GN=Gpcpd1 PE=1 SV=1        | 2.3703704 | 1  | 1   | 1  | 76.531 | 5.58 |          |          | 480000   | 2.31   |
| Q92111 | Serotransferrin OS=Mus musculus GN=Tf PE=1 SV=1                                           | 16.212339 | 9  | 16  | 9  | 76.674 | 7.18 | 960000   | 1600000  | 1300000  | 49.85  |
| Q3THK7 | GMP synthase [glutamine-hydrolyzing] OS=Mus musculus GN=Gmps PE=1 SV=2                    | 3.1746032 | 2  | 4   | 2  | 76.675 | 6.73 | 2500000  | 980000   | 2100000  | 10.92  |

|        |                                                                                      |           |    |    |    |        |      |          |          |          |        |
|--------|--------------------------------------------------------------------------------------|-----------|----|----|----|--------|------|----------|----------|----------|--------|
| P09405 | Nucleolin OS=Mus musculus GN=Ncl PE=1 SV=2                                           | 22.065064 | 14 | 30 | 14 | 76.677 | 4.75 | 23000000 | 1100000  | 19000000 | 85.78  |
| P68404 | Protein kinase C beta type OS=Mus musculus GN=Prkcb PE=1 SV=4                        | 18.628912 | 10 | 31 | 6  | 76.701 | 7.01 | 22000000 | 6900000  | 18000000 | 91.28  |
| O54781 | SRSF protein kinase 2 OS=Mus musculus GN=Sprk2 PE=1 SV=2                             | 6.4610866 | 4  | 10 | 3  | 76.709 | 4.91 | 1300000  | 500000   | 2600000  | 28.43  |
| Q3U0V1 | Far upstream element-binding protein 2 OS=Mus musculus GN=Khsrp PE=1 SV=2            | 4.144385  | 2  | 2  | 2  | 76.728 | 7.33 | 4400000  | 200000   |          | 5.22   |
| Q6P9S0 | MTSS1-like protein OS=Mus musculus GN=Mtss1 PE=1 SV=1                                | 2.9370629 | 1  | 1  | 1  | 76.797 | 6.99 | 920000   |          |          | 3.56   |
| P20444 | Protein kinase C alpha type OS=Mus musculus GN=Prkca PE=1 SV=3                       | 12.202381 | 7  | 21 | 2  | 76.802 | 7.14 | 3800000  |          | 860000   | 61.48  |
| P37040 | NADPH--cytochrome P450 reductase OS=Mus musculus GN=Por PE=1 SV=2                    | 11.20944  | 6  | 12 | 6  | 76.995 | 5.53 | 2600000  | 1400000  | 2500000  | 31.65  |
| Q8CGU1 | Calcium-binding and coiled-coil domain-containing protein 1 OS=Mus musculus GN=Calc  | 3.617945  | 2  | 4  | 2  | 77.232 | 4.82 | 1000000  |          | 1200000  | 11.75  |
| Q9QXS6 | Drebrin OS=Mus musculus GN=Dbrn1 PE=1 SV=4                                           | 35.127479 | 16 | 65 | 16 | 77.239 | 4.49 | 45000000 | 19000000 | 51000000 | 236.91 |
| Q8BG39 | Synaptic vesicle glycoprotein 2B OS=Mus musculus GN=Sv2b PE=1 SV=1                   | 15.22694  | 9  | 39 | 9  | 77.406 | 5.57 | 58000000 | 17000000 | 33000000 | 119.68 |
| Q922U1 | U4/U6 small nuclear ribonucleoprotein Prp3 OS=Mus musculus GN=Prpf3 PE=1 SV=1        | 1.6105417 | 1  | 1  | 1  | 77.407 | 9.5  | 1600000  |          |          | 2.20   |
| Q9QXK7 | Cleavage and polyadenylation specificity factor subunit 3 OS=Mus musculus GN=Cpsf3 F | 2.1929825 | 1  | 1  | 1  | 77.455 | 5.6  | 190000   |          |          | 2.76   |
| P70302 | Stromal interaction molecule 1 OS=Mus musculus GN=Stim1 PE=1 SV=2                    | 2.919708  | 1  | 1  | 1  | 77.518 | 6.54 |          |          | 1800000  | 3.96   |
| Q9D0E1 | Heterogeneous nuclear ribonucleoprotein M OS=Mus musculus GN=Hnmpm PE=1 SV=3         | 15.775034 | 9  | 21 | 9  | 77.597 | 8.63 | 8800000  | 2100000  | 8200000  | 62.36  |
| Q6PDI6 | F-box only protein 42 OS=Mus musculus GN=Fbxo42 PE=1 SV=1                            | 1.9525802 | 1  | 1  | 1  | 77.728 | 7.58 |          |          | 88000    | 2.90   |
| Q8CIB5 | Fermitin family homolog 2 OS=Mus musculus GN=Fermt2 PE=1 SV=1                        | 4.7058824 | 3  | 6  | 3  | 77.751 | 6.7  | 2700000  | 530000   | 1500000  | 16.38  |
| P41216 | Long-chain-fatty-acid--CoA ligase 1 OS=Mus musculus GN=Acsl1 PE=1 SV=2               | 3.8626609 | 3  | 4  | 3  | 77.901 | 7.15 | 2300000  |          | 2300000  | 9.10   |
| Q80U04 | E3 ubiquitin-protein ligase Praja-2 OS=Mus musculus GN=Pja2 PE=1 SV=2                | 3.2531825 | 1  | 2  | 1  | 77.91  | 4.44 | 1000000  |          | 630000   | 8.58   |
| P16014 | Secretogranin-1 OS=Mus musculus GN=Chgb PE=1 SV=2                                    | 2.2156573 | 1  | 3  | 1  | 77.922 | 5.07 | 1300000  | 1600000  | 2200000  | 9.30   |
| Q9CXJ4 | ATP-binding cassette sub-family B member 8, mitochondrial OS=Mus musculus GN=Abct    | 3.0683403 | 2  | 2  | 2  | 77.95  | 9.07 | 1300000  |          | 2500000  | 4.80   |
| Q91WC3 | Long-chain-fatty-acid--CoA ligase 6 OS=Mus musculus GN=Acsl6 PE=1 SV=1               | 15.064562 | 9  | 22 | 9  | 77.967 | 7.34 | 9900000  | 2400000  | 6700000  | 67.37  |
| Q08879 | Fibulin-1 OS=Mus musculus GN=Fbln1 PE=1 SV=2                                         | 2.4113475 | 1  | 1  | 1  | 77.981 | 5.16 |          | 170000   |          | 2.85   |
| Q60865 | Caprin-1 OS=Mus musculus GN=Caprin1 PE=1 SV=2                                        | 10.749646 | 4  | 13 | 4  | 78.121 | 5.25 | 8000000  | 3200000  | 6300000  | 40.53  |
| Q8R550 | SH3 domain-containing kinase-binding protein 1 OS=Mus musculus GN=Sh3kbp1 PE=1 S     | 6.629055  | 3  | 5  | 3  | 78.122 | 7.55 | 20000000 |          | 930000   | 15.65  |
| Q9WTR5 | Cadherin-13 OS=Mus musculus GN=Cdh13 PE=1 SV=2                                       | 7.9831933 | 4  | 12 | 4  | 78.137 | 5.12 | 4300000  | 4100000  | 4500000  | 38.68  |
| Q5SVL6 | Rap1 GTPase-activating protein 2 OS=Mus musculus GN=Rap1gap2 PE=1 SV=1               | 3.9325843 | 2  | 3  | 2  | 78.205 | 6.43 | 4300000  | 810000   | 3300000  | 8.93   |
| Q5K6N0 | Transmembrane protein 232 OS=Mus musculus GN=Tmem232 PE=2 SV=2                       | 2.5185185 | 1  | 1  | 1  | 78.225 | 7.28 | 5600000  |          |          | 0.00   |
| P63318 | Protein kinase C gamma type OS=Mus musculus GN=Prkcg PE=1 SV=1                       | 27.259684 | 14 | 36 | 13 | 78.307 | 7.46 | 29000000 | 9000000  | 19000000 | 109.03 |
| P47856 | Glutamine--fructose-6-phosphate aminotransferase [isomerizing] 1 OS=Mus musculus GN  | 2.1520803 | 1  | 1  | 1  | 78.489 | 6.84 |          |          | 430000   | 2.20   |
| Q9ESJ4 | NCK-interacting protein with SH3 domain OS=Mus musculus GN=Nckipsd PE=1 SV=2         | 12.044818 | 6  | 13 | 6  | 78.523 | 6.05 | 2400000  | 530000   | 2200000  | 37.24  |
| Q9QYB5 | Gamma-adducin OS=Mus musculus GN=Add3 PE=1 SV=2                                      | 17.280453 | 10 | 24 | 10 | 78.728 | 5.95 | 6700000  | 2300000  | 6500000  | 69.40  |
| Q9Z0E0 | Neurochondrin OS=Mus musculus GN=Ncdn PE=1 SV=1                                      | 16.59808  | 11 | 22 | 11 | 78.845 | 5.54 | 16000000 | 3300000  | 11000000 | 57.94  |
| Q9QUJ7 | Long-chain-fatty-acid--CoA ligase 4 OS=Mus musculus GN=Acsl4 PE=1 SV=2               | 2.1097046 | 1  | 1  | 1  | 79.026 | 8.28 | 520000   |          |          | 2.17   |
| Q8K3H0 | DCC-interacting protein 13-alpha OS=Mus musculus GN=Appl1 PE=1 SV=1                  | 4.950495  | 3  | 7  | 3  | 79.278 | 5.41 | 3100000  | 660000   | 3300000  | 17.42  |
| Q99MR8 | Methylcrotonoyl-CoA carboxylase subunit alpha, mitochondrial OS=Mus musculus GN=M    | 10.739191 | 6  | 17 | 6  | 79.293 | 7.83 | 6500000  | 3700000  | 1800000  | 38.50  |
| D3YVF0 | A-kinase anchor protein 5 OS=Mus musculus GN=Akap5 PE=1 SV=2                         | 47.516779 | 16 | 46 | 16 | 79.35  | 4.75 | 32000000 | 14000000 | 40000000 | 182.49 |
| P51660 | Peroxisomal multifunctional enzyme type 2 OS=Mus musculus GN=Hsd17b4 PE=1 SV=3       | 7.2108844 | 4  | 5  | 4  | 79.432 | 8.57 | 2200000  |          | 1100000  | 14.29  |
| Q80Y98 | Phospholipase DDHD2 OS=Mus musculus GN=Ddhd2 PE=1 SV=3                               | 2.0028612 | 1  | 4  | 1  | 79.527 | 5.31 | 1500000  | 660000   | 1200000  | 11.39  |
| P59823 | Interleukin-1 receptor accessory protein-like 1 OS=Mus musculus GN=Il1rapl1 PE=1 SV= | 4.6043165 | 2  | 5  | 2  | 79.579 | 6.32 | 4200000  | 710000   | 2700000  | 14.20  |
| Q99MK8 | Beta-adrenergic receptor kinase 1 OS=Mus musculus GN=Adrbk1 PE=1 SV=2                | 5.8055152 | 3  | 5  | 3  | 79.588 | 7.28 | 3200000  | 1500000  | 3300000  | 14.94  |
| P28740 | Kinesin-like protein KIF2A OS=Mus musculus GN=Kif2a PE=1 SV=2                        | 9.5035461 | 6  | 17 | 6  | 79.707 | 6.73 | 6900000  | 1700000  | 4300000  | 44.32  |
| Q91VD9 | NADH-ubiquinone oxidoreductase 75 kDa subunit, mitochondrial OS=Mus musculus GN=     | 38.376891 | 24 | 78 | 24 | 79.726 | 5.72 | 32000000 | 15000000 | 28000000 | 231.57 |
| Q5U3K5 | Rab-like protein 6 OS=Mus musculus GN=Rabl6 PE=1 SV=2                                | 8.6896552 | 5  | 10 | 5  | 79.782 | 5.53 | 4300000  | 640000   | 2300000  | 29.81  |
| Q3UHB8 | Coiled-coil domain-containing protein 177 OS=Mus musculus GN=Ccdc177 PE=1 SV=1       | 3.5410765 | 2  | 4  | 2  | 79.809 | 10.8 | 3800000  | 610000   | 2300000  | 13.75  |
| O08529 | Calpain-2 catalytic subunit OS=Mus musculus GN=Capn2 PE=1 SV=4                       | 12.857143 | 8  | 19 | 8  | 79.822 | 4.96 | 3800000  | 1200000  | 4100000  | 55.08  |
| Q91ZA3 | Propionyl-CoA carboxylase alpha chain, mitochondrial OS=Mus musculus GN=Pcca PE=     | 12.154696 | 7  | 17 | 7  | 79.871 | 7.25 | 4600000  | 2600000  | 5100000  | 49.68  |
| O35250 | Exocyst complex component 7 OS=Mus musculus GN=Exoc7 PE=1 SV=2                       | 6.025825  | 3  | 6  | 3  | 79.911 | 6.98 | 1800000  | 1200000  | 1400000  | 16.28  |
| Q7TN98 | Cytoplasmic polyadenylation element-binding protein 4 OS=Mus musculus GN=Cpeb4 PE    | 3.9780521 | 2  | 4  | 2  | 80.072 | 7.18 | 860000   |          | 550000   | 11.08  |

|        |                                                                                                                 |           |    |     |    |        |      |           |          |          |        |
|--------|-----------------------------------------------------------------------------------------------------------------|-----------|----|-----|----|--------|------|-----------|----------|----------|--------|
| P28741 | Kinesin-like protein KIF3A OS=Mus musculus GN=Kif3a PE=1 SV=2                                                   | 6.2767475 | 4  | 8   | 4  | 80.12  | 6.54 | 1800000   |          | 2000000  | 18.28  |
| Q8BLV3 | Sodium/hydrogen exchanger 7 OS=Mus musculus GN=Slc9a7 PE=1 SV=1                                                 | 1.5151515 | 1  | 1   | 1  | 80.238 | 6.4  |           |          | 230000   | 2.33   |
| Q99PU5 | Long-chain-fatty-acid--CoA ligase ACSBG1 OS=Mus musculus GN=Acsbg1 PE=1 SV=1                                    | 15.950069 | 8  | 16  | 8  | 80.374 | 5.94 | 6200000   | 1800000  | 4600000  | 42.54  |
| Q06335 | Amyloid-like protein 2 OS=Mus musculus GN=Aplp2 PE=1 SV=4                                                       | 5.9405941 | 3  | 6   | 3  | 80.416 | 4.7  | 1400000   | 1100000  | 1800000  | 18.37  |
| Q62108 | Disks large homolog 4 OS=Mus musculus GN=Dlg4 PE=1 SV=1                                                         | 26.79558  | 18 | 51  | 17 | 80.423 | 5.87 | 47000000  | 6300000  | 38000000 | 155.30 |
| Q8BWS5 | G protein-regulated inducer of neurite outgrowth 3 OS=Mus musculus GN=Gprn3 PE=1 SV=1                           | 6.9462647 | 4  | 5   | 4  | 80.435 | 7.02 | 800000    |          |          | 12.44  |
| Q9CZW4 | Long-chain-fatty-acid--CoA ligase 3 OS=Mus musculus GN=Acl3 PE=1 SV=2                                           | 3.4722222 | 2  | 4   | 2  | 80.441 | 8.54 | 3200000   |          | 1500000  | 10.47  |
| P46978 | Dolichyl-diphosphooligosaccharide--protein glycosyltransferase subunit STT3A OS=Mus musculus GN=Stt3a PE=1 SV=1 | 1.7021277 | 1  | 3   | 1  | 80.545 | 8.1  | 3500000   | 890000   | 1600000  | 7.32   |
| Q9QYB8 | Beta-adducin OS=Mus musculus GN=Add2 PE=1 SV=4                                                                  | 32.689655 | 20 | 58  | 19 | 80.591 | 6.21 | 27000000  | 8200000  | 26000000 | 176.41 |
| Q9QYCO | Alpha-adducin OS=Mus musculus GN=Add1 PE=1 SV=2                                                                 | 35.510204 | 20 | 70  | 19 | 80.596 | 5.9  | 30000000  | 9300000  | 27000000 | 209.08 |
| Q9R1R2 | Tripartite motif-containing protein 3 OS=Mus musculus GN=Trim3 PE=1 SV=1                                        | 3.6290323 | 2  | 3   | 2  | 80.724 | 7.81 | 5500000   | 1300000  | 1700000  | 8.35   |
| A2AQ19 | RNA polymerase-associated protein RTF1 homolog OS=Mus musculus GN=Rtf1 PE=1 SV=1                                | 1.5384615 | 1  | 1   | 1  | 80.748 | 8.16 | 1100000   |          |          | 2.24   |
| Q64521 | Glycerol-3-phosphate dehydrogenase, mitochondrial OS=Mus musculus GN=Gpd2 PE=1 SV=1                             | 33.837689 | 22 | 62  | 22 | 80.902 | 6.61 | 19000000  | 13000000 | 16000000 | 183.33 |
| Q6PGF7 | Exocyst complex component 8 OS=Mus musculus GN=Exoc8 PE=1 SV=1                                                  | 4.4692737 | 2  | 4   | 2  | 80.984 | 5.4  | 1400000   | 590000   | 1000000  | 11.86  |
| Q8BJJ1 | Sodium-dependent neutral amino acid transporter SLC6A17 OS=Mus musculus GN=Slc6a17 PE=1 SV=1                    | 11.141678 | 5  | 14  | 5  | 81.018 | 6.23 | 12000000  | 1900000  | 6100000  | 48.54  |
| Q8C561 | LMBR1 domain-containing protein 2 OS=Mus musculus GN=Lmbrd2 PE=1 SV=1                                           | 4.3227666 | 3  | 3   | 3  | 81.049 | 7.34 | 1600000   |          |          | 10.33  |
| Q9ET77 | Junctophilin-3 OS=Mus musculus GN=Jph3 PE=1 SV=1                                                                | 1.7473118 | 1  | 2   | 1  | 81.18  | 9.22 | 2100000   |          | 1700000  | 5.50   |
| P29533 | Vascular cell adhesion protein 1 OS=Mus musculus GN=Vcam1 PE=1 SV=1                                             | 10.14885  | 6  | 10  | 6  | 81.265 | 5.3  | 1400000   | 1100000  | 1900000  | 29.46  |
| Q9ESN6 | Tripartite motif-containing protein 2 OS=Mus musculus GN=Trim2 PE=1 SV=1                                        | 11.155914 | 6  | 12  | 6  | 81.394 | 6.96 | 5000000   | 1400000  | 3000000  | 34.93  |
| Q02111 | Protein kinase C theta type OS=Mus musculus GN=Prkcq PE=1 SV=1                                                  | 2.5459689 | 2  | 4   | 1  | 81.519 | 7.71 |           |          | 2900000  | 8.99   |
| P58404 | Striatin-4 OS=Mus musculus GN=Strn4 PE=1 SV=2                                                                   | 8.5526316 | 6  | 16  | 6  | 81.595 | 5.38 | 3000000   | 1200000  | 3800000  | 44.94  |
| Q69Z98 | Serine/threonine-protein kinase BRSK2 OS=Mus musculus GN=Brsk2 PE=1 SV=2                                        | 1.9047619 | 1  | 3   | 1  | 81.682 | 8.79 | 4700000   | 840000   | 2600000  | 11.28  |
| Q3TPX4 | Exocyst complex component 5 OS=Mus musculus GN=Exoc5 PE=1 SV=2                                                  | 2.8248588 | 2  | 2   | 2  | 81.686 | 6.71 |           | 420000   | 1300000  | 4.31   |
| Q02257 | Junction plakoglobin OS=Mus musculus GN=Jup PE=1 SV=3                                                           | 6.5771812 | 4  | 10  | 3  | 81.749 | 6.14 | 2100000   | 500000   | 2900000  | 28.48  |
| Q9CZD3 | Glycine--tRNA ligase OS=Mus musculus GN=Gars PE=1 SV=1                                                          | 2.0576132 | 1  | 1   | 1  | 81.826 | 6.65 |           |          | 620000   | 3.35   |
| Q8VDU5 | SNF-related serine/threonine-protein kinase OS=Mus musculus GN=Snrk PE=1 SV=1                                   | 3.7433155 | 1  | 1   | 1  | 81.861 | 7.49 | 330000    |          |          | 4.34   |
| Q8K0V4 | CCR4-NOT transcription complex subunit 3 OS=Mus musculus GN=Cnot3 PE=1 SV=1                                     | 1.8641811 | 1  | 1   | 1  | 81.896 | 6.2  |           |          | 870000   | 2.91   |
| Q8C754 | Vacuolar protein sorting-associated protein 52 homolog OS=Mus musculus GN=Vps52 PE=1 SV=1                       | 4.4260028 | 3  | 5   | 3  | 81.993 | 5.9  | 1400000   |          | 740000   | 12.59  |
| O35350 | Calpain-1 catalytic subunit OS=Mus musculus GN=Capn1 PE=1 SV=1                                                  | 1.6830295 | 1  | 2   | 1  | 82.054 | 5.87 |           | 1100000  | 2200000  | 5.82   |
| Q63959 | Potassium voltage-gated channel subfamily C member 3 OS=Mus musculus GN=Kcnc3 PE=1 SV=1                         | 3.3810143 | 2  | 2   | 2  | 82.09  | 7.09 |           |          | 740000   | 4.63   |
| Q8CHT1 | Ephexin-1 OS=Mus musculus GN=Ngef PE=1 SV=1                                                                     | 4.2253521 | 3  | 8   | 3  | 82.148 | 5.99 | 7100000   | 1800000  | 5200000  | 20.17  |
| Q9QYE6 | Golgin subfamily A member 5 OS=Mus musculus GN=Golga5 PE=1 SV=2                                                 | 3.5665295 | 1  | 1   | 1  | 82.318 | 6.23 | 330000    |          |          | 2.80   |
| O35691 | Pinin OS=Mus musculus GN=Pnn PE=1 SV=4                                                                          | 9.6551724 | 4  | 8   | 4  | 82.386 | 7.01 | 2500000   |          | 2100000  | 29.17  |
| Q91VR5 | ATP-dependent RNA helicase DDX1 OS=Mus musculus GN=Ddx1 PE=1 SV=1                                               | 14.054054 | 8  | 14  | 8  | 82.448 | 7.21 | 8700000   | 1400000  | 4200000  | 39.17  |
| Q61102 | ATP-binding cassette sub-family B member 7, mitochondrial OS=Mus musculus GN=Abcb7 PE=1 SV=1                    | 1.5957447 | 1  | 2   | 1  | 82.529 | 9.32 | 3300000   |          | 1900000  | 4.74   |
| P46460 | Vesicle-fusing ATPase OS=Mus musculus GN=Nsf PE=1 SV=2                                                          | 47.177419 | 34 | 130 | 34 | 82.561 | 6.95 | 110000000 | 61000000 | 88000000 | 367.41 |
| Q9JIS5 | Synaptic vesicle glycoprotein 2A OS=Mus musculus GN=Sv2a PE=1 SV=1                                              | 12.398922 | 9  | 47  | 9  | 82.594 | 5.57 | 63000000  | 12000000 | 27000000 | 143.47 |
| Q8K1M6 | Dynamin-1-like protein OS=Mus musculus GN=Dnm1 PE=1 SV=2                                                        | 21.563342 | 13 | 30  | 13 | 82.606 | 7.05 | 6200000   | 2300000  | 4700000  | 90.64  |
| Q8BMS1 | Trifunctional enzyme subunit alpha, mitochondrial OS=Mus musculus GN=Hadha PE=1 SV=1                            | 7.2083879 | 5  | 10  | 5  | 82.617 | 9.14 | 15000000  | 5400000  | 4100000  | 29.68  |
| P98084 | Amyloid beta A4 precursor protein-binding family A member 2 OS=Mus musculus GN=Aplp2 PE=1 SV=4                  | 3.4666667 | 2  | 3   | 1  | 82.706 | 4.88 | 2400000   |          | 1700000  | 6.42   |
| P16332 | Methylmalonyl-CoA mutase, mitochondrial OS=Mus musculus GN=Mut PE=1 SV=2                                        | 5.0802139 | 3  | 7   | 3  | 82.792 | 6.89 | 1900000   | 820000   | 1500000  | 20.43  |
| Q99LI7 | Cleavage stimulation factor subunit 3 OS=Mus musculus GN=Cstf3 PE=1 SV=1                                        | 1.8131102 | 1  | 1   | 1  | 82.824 | 8.12 |           |          |          | 3.01   |
| Q6PGN3 | Serine/threonine-protein kinase DCLK2 OS=Mus musculus GN=Dclk2 PE=1 SV=1                                        | 1.984127  | 1  | 1   | 1  | 82.927 | 8.44 |           |          | 500000   | 3.95   |
| Q9Z210 | LETM1 and EF-hand domain-containing protein 1, mitochondrial OS=Mus musculus GN=Letm1 PE=1 SV=1                 | 21.409214 | 14 | 42  | 14 | 82.937 | 6.52 | 15000000  | 7800000  | 12000000 | 124.19 |
| Q8BSY0 | Aspartyl/asparaginyl beta-hydroxylase OS=Mus musculus GN=Asph PE=1 SV=1                                         | 7.0175439 | 2  | 10  | 2  | 82.991 | 5.08 | 3900000   | 2100000  | 3800000  | 30.22  |
| Q8BH55 | Threonine synthase-like 1 OS=Mus musculus GN=Thns1 PE=1 SV=1                                                    | 1.7402945 | 1  | 1   | 1  | 83.047 | 7.2  |           |          | 530000   | 1.87   |
| Q8C167 | Prolyl endopeptidase-like OS=Mus musculus GN=Prepl PE=1 SV=1                                                    | 11.172414 | 7  | 15  | 7  | 83.141 | 6.65 | 4900000   | 1500000  | 4400000  | 46.67  |
| Q8BUK6 | Protein Hook homolog 3 OS=Mus musculus GN=Hook3 PE=1 SV=2                                                       | 7.1030641 | 4  | 11  | 4  | 83.166 | 5.19 | 2200000   | 1300000  | 6400000  | 34.16  |



|        |                                                                                                              |           |    |     |    |        |      |          |          |          |        |
|--------|--------------------------------------------------------------------------------------------------------------|-----------|----|-----|----|--------|------|----------|----------|----------|--------|
| P11499 | Heat shock protein HSP 90-beta OS=Mus musculus GN=Hsp90ab1 PE=1 SV=3                                         | 41.850829 | 29 | 117 | 16 | 83.229 | 5.03 | 77000000 | 29000000 | 69000000 | 351.31 |
| Q8BUV3 | Gephyrin OS=Mus musculus GN=Gphn PE=1 SV=2                                                                   | 18.335501 | 9  | 19  | 9  | 83.23  | 5.6  | 7200000  | 1500000  | 7800000  | 58.67  |
| Q7TME0 | Phospholipid phosphatase-related protein type 4 OS=Mus musculus GN=Pppr4 PE=1 SV=1                           | 8.0939948 | 4  | 7   | 4  | 83.238 | 8.84 | 2400000  | 750000   | 3500000  | 17.90  |
| Q9D0R2 | Threonine--tRNA ligase, cytoplasmic OS=Mus musculus GN=Tars PE=1 SV=2                                        | 6.3711911 | 3  | 3   | 3  | 83.303 | 7.36 | 900000   |          |          | 9.02   |
| P63154 | Crooked neck-like protein 1 OS=Mus musculus GN=Crnk1 PE=1 SV=1                                               | 1.7391304 | 1  | 1   | 1  | 83.363 | 6.93 | 450000   |          |          | 2.62   |
| Q80TL0 | Protein phosphatase 1E OS=Mus musculus GN=Ppm1e PE=1 SV=2                                                    | 2.0026702 | 1  | 5   | 1  | 83.367 | 4.97 | 18000000 | 5200000  | 18000000 | 17.17  |
| Q7TMQ7 | WD repeat-containing protein 91 OS=Mus musculus GN=Wdr91 PE=1 SV=1                                           | 2.1390374 | 1  | 1   | 1  | 83.368 | 6.64 |          | 1500000  |          | 2.55   |
| Q7TNM2 | Tripartite motif-containing protein 46 OS=Mus musculus GN=Trim46 PE=1 SV=1                                   | 1.9762846 | 1  | 2   | 1  | 83.378 | 7.65 | 1200000  |          | 560000   | 6.84   |
| P16054 | Protein kinase C epsilon type OS=Mus musculus GN=Prkce PE=1 SV=1                                             | 19.674355 | 12 | 37  | 11 | 83.507 | 7.03 | 8000000  | 1900000  | 4700000  | 104.70 |
| Q8K0T0 | Reticulon-1 OS=Mus musculus GN=Rtn1 PE=1 SV=1                                                                | 20.128205 | 12 | 33  | 11 | 83.521 | 4.58 | 25000000 | 6000000  | 19000000 | 93.23  |
| Q8BHL5 | Engulfment and cell motility protein 2 OS=Mus musculus GN=Elmo2 PE=1 SV=1                                    | 11.065574 | 5  | 7   | 5  | 83.833 | 5.95 | 1500000  | 1200000  | 1500000  | 21.83  |
| Q8CAQ8 | MICOS complex subunit Mic60 OS=Mus musculus GN=Immt PE=1 SV=1                                                | 38.441215 | 25 | 82  | 25 | 83.848 | 6.61 | 32000000 | 22000000 | 38000000 | 236.65 |
| Q6Y685 | Transforming acidic coiled-coil-containing protein 1 OS=Mus musculus GN=Tacc1 PE=1 SV=1                      | 3.4883721 | 1  | 1   | 1  | 83.9   | 5.03 |          |          |          | 4.15   |
| Q99MD9 | Nuclear autoantigenic sperm protein OS=Mus musculus GN=Nasp PE=1 SV=2                                        | 1.4230272 | 1  | 1   | 1  | 83.903 | 4.37 |          |          | 640000   | 3.00   |
| Q8BXR1 | Probable cationic amino acid transporter OS=Mus musculus GN=Slc7a14 PE=1 SV=1                                | 3.2425422 | 2  | 6   | 2  | 83.929 | 5.35 | 2800000  | 880000   | 1700000  | 13.95  |
| Q3UFS0 | Protein zyg-11 homolog B OS=Mus musculus GN=Zyg11b PE=1 SV=2                                                 | 2.016129  | 1  | 1   | 1  | 83.937 | 6.87 |          |          | 310000   | 2.02   |
| Q9D2N4 | Dystrobrevin alpha OS=Mus musculus GN=Dtna PE=1 SV=2                                                         | 4.155496  | 3  | 5   | 3  | 84.014 | 6.76 | 2600000  |          | 2000000  | 15.06  |
| Q9JIG4 | Protein phosphatase 1 regulatory subunit 3F OS=Mus musculus GN=Ppp1r3f PE=1 SV=3                             | 2.252816  | 1  | 1   | 1  | 84.068 | 4.7  |          |          | 380000   | 3.45   |
| Q9R1V4 | Disintegrin and metalloproteinase domain-containing protein 11 OS=Mus musculus GN=Adis11 PE=1 SV=1           | 12.936611 | 7  | 14  | 7  | 84.08  | 7.5  | 4800000  | 3700000  | 4400000  | 44.18  |
| Q9JLM8 | Serine/threonine-protein kinase DCLK1 OS=Mus musculus GN=Dclk1 PE=1 SV=1                                     | 19.57672  | 10 | 21  | 10 | 84.101 | 8.87 | 7600000  | 1700000  | 3500000  | 67.34  |
| Q01063 | cAMP-specific 3',5'-cyclic phosphodiesterase 4D OS=Mus musculus GN=Pde4d PE=1 SV=1                           | 5.4886212 | 3  | 3   | 3  | 84.509 | 4.91 | 1700000  |          | 1200000  | 8.80   |
| Q3UMT1 | Protein phosphatase 1 regulatory subunit 12C OS=Mus musculus GN=Ppp1r12c PE=1 SV=1                           | 1.6624041 | 1  | 1   | 1  | 84.634 | 6    |          |          | 530000   | 2.17   |
| P07901 | Heat shock protein HSP 90-alpha OS=Mus musculus GN=Hsp90aa1 PE=1 SV=4                                        | 43.24693  | 33 | 121 | 22 | 84.735 | 5.01 | 96000000 | 35000000 | 80000000 | 353.01 |
| Q00PI9 | Heterogeneous nuclear ribonucleoprotein U-like protein 2 OS=Mus musculus GN=Hnrnpu2 PE=1 SV=1                | 27.785235 | 17 | 43  | 17 | 84.888 | 4.89 | 15000000 | 1100000  | 9600000  | 122.75 |
| Q5RJJ5 | Serine/threonine-protein kinase BRSK1 OS=Mus musculus GN=Brsk1 PE=1 SV=1                                     | 1.7994859 | 1  | 2   | 1  | 85.102 | 9.32 | 1600000  |          | 850000   | 5.89   |
| P47857 | ATP-dependent 6-phosphofructokinase, muscle type OS=Mus musculus GN=Pfkfb1 PE=1 SV=1                         | 12.564103 | 8  | 23  | 7  | 85.215 | 8    | 8700000  | 2600000  | 4000000  | 61.49  |
| Q61771 | Kinesin-like protein KIF3B OS=Mus musculus GN=Kif3b PE=1 SV=1                                                | 8.2998661 | 4  | 8   | 4  | 85.236 | 7.69 | 2000000  | 760000   | 1200000  | 18.97  |
| Q68FF6 | ARF GTPase-activating protein GIT1 OS=Mus musculus GN=Git1 PE=1 SV=1                                         | 10.649351 | 6  | 11  | 6  | 85.247 | 6.93 | 3800000  | 360000   | 2000000  | 32.00  |
| Q80TI0 | GRAM domain-containing protein 1B OS=Mus musculus GN=Gramd1b PE=1 SV=2                                       | 1.4905149 | 1  | 1   | 1  | 85.301 | 6.14 | 2300000  |          |          | 2.34   |
| P12382 | ATP-dependent 6-phosphofructokinase, liver type OS=Mus musculus GN=Pfkfb2 PE=1 SV=1                          | 5.6410256 | 4  | 13  | 2  | 85.305 | 7.17 | 3400000  | 4300000  | 4800000  | 42.01  |
| Q9WUA3 | ATP-dependent 6-phosphofructokinase, platelet type OS=Mus musculus GN=Pfkfb3 PE=1 SV=1                       | 13.010204 | 9  | 24  | 7  | 85.4   | 7.11 | 14000000 | 3700000  | 5100000  | 70.70  |
| Q99KI0 | Aconitate hydratase, mitochondrial OS=Mus musculus GN=Aco2 PE=1 SV=1                                         | 36.794872 | 29 | 95  | 29 | 85.41  | 7.93 | 87000000 | 34000000 | 67000000 | 300.47 |
| Q02248 | Catenin beta-1 OS=Mus musculus GN=Ctnnb1 PE=1 SV=1                                                           | 15.364917 | 8  | 23  | 7  | 85.416 | 5.86 | 11000000 | 3500000  | 6800000  | 76.86  |
| Q9QYH6 | Melanoma-associated antigen D1 OS=Mus musculus GN=Maged1 PE=1 SV=1                                           | 1.9354839 | 1  | 3   | 1  | 85.617 | 7.5  | 1400000  | 690000   | 760000   | 10.97  |
| Q62351 | Transferrin receptor protein 1 OS=Mus musculus GN=Tfrc PE=1 SV=1                                             | 5.7667104 | 4  | 8   | 4  | 85.677 | 6.57 | 1700000  | 560000   | 990000   | 21.56  |
| Q03173 | Protein enabled homolog OS=Mus musculus GN=Enah PE=1 SV=2                                                    | 1.3715711 | 1  | 1   | 1  | 85.792 | 7.72 |          |          | 1100000  | 2.33   |
| Q8R3B1 | 1-phosphatidylinositol 4,5-bisphosphate phosphodiesterase delta-1 OS=Mus musculus GN=Plcdelta1 PE=1 SV=1     | 2.6455026 | 1  | 1   | 1  | 85.819 | 6.21 |          |          | 1200000  | 3.41   |
| Q60611 | DNA-binding protein SATB1 OS=Mus musculus GN=Satb1 PE=1 SV=2                                                 | 1.3089005 | 1  | 1   | 1  | 85.826 | 6.54 | 780000   |          |          | 2.70   |
| P13020 | Gelsolin OS=Mus musculus GN=Gsn PE=1 SV=3                                                                    | 5         | 2  | 2   | 2  | 85.888 | 6.18 |          | 2000000  | 2900000  | 7.33   |
| Q9WTR1 | Transient receptor potential cation channel subfamily V member 2 OS=Mus musculus GN=TRPV2 PE=1 SV=1          | 3.5714286 | 2  | 4   | 2  | 85.91  | 6.99 | 970000   |          | 710000   | 13.26  |
| O55106 | Striatin OS=Mus musculus GN=Strn PE=1 SV=2                                                                   | 14.871795 | 7  | 15  | 7  | 85.913 | 5.27 | 2900000  | 1000000  | 2700000  | 47.85  |
| Q99LI8 | Hepatocyte growth factor-regulated tyrosine kinase substrate OS=Mus musculus GN=Hgrs OS=Mus musculus GN=Hgrs | 5.6774194 | 4  | 9   | 4  | 85.961 | 6.16 | 2400000  | 1200000  | 2600000  | 22.14  |
| A2AG50 | MAP7 domain-containing protein 2 OS=Mus musculus GN=Map7d2 PE=1 SV=1                                         | 5.7618438 | 3  | 4   | 3  | 85.997 | 8.81 | 780000   |          | 650000   | 13.40  |
| P06537 | Glucocorticoid receptor OS=Mus musculus GN=Nr3c1 PE=1 SV=1                                                   | 1.7879949 | 1  | 1   | 1  | 85.998 | 6.35 | 290000   |          |          | 3.04   |
| Q8VD37 | SH3-containing GRB2-like protein 3-interacting protein 1 OS=Mus musculus GN=Sgip1 PE=1 SV=1                  | 20.595533 | 10 | 26  | 10 | 86.01  | 7.87 | 11000000 | 2100000  | 8200000  | 73.86  |
| Q01405 | Protein transport protein Sec23A OS=Mus musculus GN=Sec23a PE=1 SV=2                                         | 1.6993464 | 1  | 1   | 1  | 86.106 | 7.08 | 2200000  |          |          | 1.93   |
| Q80U63 | Mitofusin-2 OS=Mus musculus GN=Mfn2 PE=1 SV=3                                                                | 18.361955 | 11 | 18  | 11 | 86.133 | 6.77 | 5200000  | 1600000  | 3000000  | 52.27  |
| Q8BGC0 | HIV Tat-specific factor 1 homolog OS=Mus musculus GN=Htatsf1 PE=1 SV=1                                       | 10.964333 | 4  | 5   | 4  | 86.188 | 4.4  | 1300000  |          | 350000   | 15.24  |

|        |                                                                                      |           |    |    |    |        |      |          |          |          |        |
|--------|--------------------------------------------------------------------------------------|-----------|----|----|----|--------|------|----------|----------|----------|--------|
| Q8C145 | Zinc transporter ZIP6 OS=Mus musculus GN=Slc39a6 PE=1 SV=1                           | 8.2352941 | 3  | 3  | 3  | 86.326 | 6.84 | 410000   | 680000   |          | 4.13   |
| Q6KAR6 | Exocyst complex component 3 OS=Mus musculus GN=Exoc3 PE=1 SV=2                       | 1.4569536 | 1  | 1  | 1  | 86.4   | 6.2  |          | 580000   |          | 2.12   |
| Q6NZF1 | Zinc finger CCCH domain-containing protein 11A OS=Mus musculus GN=Zc3h11a PE=1       | 2.020202  | 1  | 1  | 1  | 86.438 | 8.13 | 210000   |          |          | 3.19   |
| O54916 | RalBP1-associated Eps domain-containing protein 1 OS=Mus musculus GN=Reps1 PE=1      | 2.6415094 | 2  | 4  | 1  | 86.466 | 5.58 | 1500000  |          | 1100000  | 9.37   |
| P12023 | Amyloid beta A4 protein OS=Mus musculus GN=App PE=1 SV=3                             | 17.012987 | 9  | 29 | 9  | 86.667 | 4.79 | 6200000  | 5200000  | 9400000  | 91.06  |
| Q9D4H8 | Cullin-2 OS=Mus musculus GN=Cul2 PE=1 SV=2                                           | 2.8187919 | 2  | 3  | 2  | 86.821 | 7.01 | 1400000  |          | 1500000  | 6.93   |
| Q810J8 | Zinc finger FYVE domain-containing protein 1 OS=Mus musculus GN=Zfyve1 PE=1 SV=2     | 3.8610039 | 2  | 5  | 2  | 86.884 | 7.34 | 1200000  | 230000   | 970000   | 13.88  |
| P52479 | Ubiquitin carboxyl-terminal hydrolase 10 OS=Mus musculus GN=Usp10 PE=1 SV=3          | 1.5151515 | 1  | 1  | 1  | 86.968 | 5.17 | 1500000  |          |          | 2.31   |
| Q9ERG2 | Striatin-3 OS=Mus musculus GN=Strn3 PE=1 SV=1                                        | 15.075377 | 8  | 13 | 8  | 87.096 | 5.29 | 2800000  | 2800000  | 4900000  | 43.51  |
| Q6ZQK5 | Arf-GAP with coiled-coil, ANK repeat and PH domain-containing protein 2 OS=Mus muscu | 3.7662338 | 2  | 3  | 2  | 87.156 | 6.68 | 210000   |          | 570000   | 8.54   |
| P27612 | Phospholipase A-2-activating protein OS=Mus musculus GN=Plaa PE=1 SV=4               | 5.5415617 | 3  | 5  | 3  | 87.166 | 6.14 | 1500000  | 420000   | 790000   | 16.75  |
| Q8BHL3 | TBC1 domain family member 10B OS=Mus musculus GN=Tbc1d10b PE=1 SV=2                  | 0.877193  | 1  | 3  | 1  | 87.221 | 8.9  | 2200000  | 670000   | 1900000  | 6.25   |
| Q8K1N1 | Calcium-independent phospholipase A2-gamma OS=Mus musculus GN=Pnpla8 PE=1 SV         | 1.9329897 | 1  | 1  | 1  | 87.326 | 9.23 |          |          |          | 2.13   |
| A2A699 | Protein FAM171A2 OS=Mus musculus GN=Fam171a2 PE=1 SV=1                               | 1.8248175 | 1  | 3  | 1  | 87.433 | 8.05 | 2100000  | 600000   | 1500000  | 8.66   |
| Q8K2L8 | Trafficking protein particle complex subunit 12 OS=Mus musculus GN=Trappc12 PE=1 SV  | 1.5056462 | 1  | 1  | 1  | 87.639 | 4.81 |          |          | 680000   | 2.75   |
| Q8VEK3 | Heterogeneous nuclear ribonucleoprotein U OS=Mus musculus GN=Hnrnpu PE=1 SV=1        | 18.375    | 11 | 36 | 11 | 87.863 | 6.24 | 34000000 | 2000000  | 17000000 | 96.41  |
| P55288 | Cadherin-11 OS=Mus musculus GN=Cdh11 PE=1 SV=1                                       | 2.0100503 | 1  | 1  | 1  | 88.058 | 4.89 |          |          | 830000   | 2.88   |
| P09055 | Integrin beta-1 OS=Mus musculus GN=Itgb1 PE=1 SV=1                                   | 5.2631579 | 4  | 5  | 4  | 88.173 | 5.94 | 1800000  | 1400000  | 840000   | 11.15  |
| P70408 | Cadherin-10 OS=Mus musculus GN=Cdh10 PE=1 SV=3                                       | 3.0456853 | 2  | 4  | 2  | 88.257 | 4.94 | 1600000  |          | 1700000  | 11.04  |
| Q8VHJ5 | Serine/threonine-protein kinase MARK1 OS=Mus musculus GN=Mark1 PE=1 SV=2             | 2.7672956 | 2  | 5  | 2  | 88.28  | 9.39 | 3100000  | 1100000  | 2000000  | 13.64  |
| Q3TDD9 | Protein phosphatase 1 regulatory subunit 21 OS=Mus musculus GN=Ppp1r21 PE=1 SV=2     | 5.1282051 | 3  | 5  | 3  | 88.282 | 6.9  | 1700000  | 140000   | 630000   | 15.28  |
| Q9Z2G6 | Protein sel-1 homolog 1 OS=Mus musculus GN=Sel1l PE=1 SV=2                           | 4.9367089 | 3  | 9  | 3  | 88.285 | 5.57 | 2800000  | 2500000  | 4100000  | 28.13  |
| O35218 | Cleavage and polyadenylation specificity factor subunit 2 OS=Mus musculus GN=Cpsf2 F | 1.6624041 | 1  | 1  | 1  | 88.327 | 5.11 |          |          | 740000   | 2.72   |
| Q499E0 | BMP/retinoic acid-inducible neural-specific protein 3 OS=Mus musculus GN=Brinp3 PE=2 | 1.6971279 | 1  | 1  | 1  | 88.426 | 7.9  |          |          | 520000   | 2.32   |
| Q91WG7 | Diacylglycerol kinase gamma OS=Mus musculus GN=Dgkg PE=1 SV=1                        | 5.7106599 | 3  | 4  | 3  | 88.466 | 6.76 | 1400000  |          | 330000   | 11.98  |
| Q8K4Z5 | Splicing factor 3A subunit 1 OS=Mus musculus GN=Sf3a1 PE=1 SV=1                      | 2.9077118 | 2  | 5  | 2  | 88.489 | 5.22 | 2600000  | 560000   | 1000000  | 12.86  |
| Q920P3 | BMP/retinoic acid-inducible neural-specific protein 1 OS=Mus musculus GN=Brinp1 PE=1 | 3.6842105 | 3  | 4  | 3  | 88.584 | 8.97 | 2500000  | 750000   | 1800000  | 8.54   |
| P28028 | Serine/threonine-protein kinase B-raf OS=Mus musculus GN=Braf PE=1 SV=3              | 1.4925373 | 1  | 1  | 1  | 88.724 | 7.65 |          |          | 380000   | 2.69   |
| Q91W50 | Cold shock domain-containing protein E1 OS=Mus musculus GN=Csde1 PE=1 SV=1           | 14.786967 | 10 | 15 | 10 | 88.735 | 6.37 | 2600000  | 590000   | 2700000  | 42.00  |
| Q3B7Z2 | Oxysterol-binding protein 1 OS=Mus musculus GN=Osbp PE=1 SV=3                        | 1.3664596 | 1  | 1  | 1  | 88.741 | 7.2  |          |          | 700000   | 2.51   |
| Q62318 | Transcription intermediary factor 1-beta OS=Mus musculus GN=Trim28 PE=1 SV=3         | 10.911271 | 5  | 12 | 5  | 88.791 | 5.77 | 8700000  | 770000   | 5200000  | 46.31  |
| Q9JLV5 | Cullin-3 OS=Mus musculus GN=Cul3 PE=1 SV=1                                           | 13.802083 | 8  | 15 | 8  | 88.891 | 8.46 | 4300000  | 1300000  | 2800000  | 46.14  |
| Q5SSM3 | Rho GTPase-activating protein 44 OS=Mus musculus GN=Arhgap44 PE=1 SV=1               | 4.4226044 | 3  | 6  | 3  | 88.937 | 6.6  | 1300000  | 990000   | 2500000  | 16.28  |
| Q9EQC5 | N-terminal kinase-like protein OS=Mus musculus GN=Scyl1 PE=1 SV=1                    | 4.3424318 | 2  | 4  | 2  | 89.104 | 6.44 | 2200000  | 870000   | 2000000  | 12.21  |
| Q01853 | Transitional endoplasmic reticulum ATPase OS=Mus musculus GN=Vcp PE=1 SV=4           | 38.709677 | 26 | 90 | 26 | 89.266 | 5.26 | 27000000 | 11000000 | 20000000 | 291.26 |
| Q9Z268 | RasGAP-activating-like protein 1 OS=Mus musculus GN=Rasal1 PE=1 SV=2                 | 15.769712 | 11 | 22 | 11 | 89.339 | 6.37 | 9200000  | 2500000  | 5200000  | 68.60  |
| Q8JZQ2 | AFG3-like protein 2 OS=Mus musculus GN=Afg3l2 PE=1 SV=1                              | 15.087282 | 13 | 35 | 13 | 89.463 | 8.6  | 4400000  | 1900000  | 2600000  | 103.67 |
| Q8CCJ3 | E3 UFM1-protein ligase 1 OS=Mus musculus GN=Ufl1l PE=1 SV=2                          | 1.5132409 | 1  | 1  | 1  | 89.464 | 6.67 | 1300000  |          |          | 2.34   |
| Q6R891 | Neurabin-2 OS=Mus musculus GN=Ppp1r9b PE=1 SV=1                                      | 21.052632 | 11 | 26 | 11 | 89.466 | 4.92 | 12000000 | 3700000  | 12000000 | 80.10  |
| Q05BC3 | Echinoderm microtubule-associated protein-like 1 OS=Mus musculus GN=Eml1 PE=1 SV     | 1.3513514 | 1  | 1  | 1  | 89.624 | 7.02 | 1300000  |          |          | 2.12   |
| Q9WTX6 | Cullin-1 OS=Mus musculus GN=Cul1 PE=1 SV=1                                           | 3.9948454 | 2  | 3  | 2  | 89.635 | 8    | 1100000  |          |          | 7.90   |
| Q9JLF6 | Protein-glutamine gamma-glutamyltransferase K OS=Mus musculus GN=Tgm1 PE=1 SV        | 2.5766871 | 2  | 4  | 2  | 89.769 | 6.51 |          | 440000   | 2200000  | 8.72   |
| Q8BGD5 | Carnitine O-palmitoyltransferase 1, brain isoform OS=Mus musculus GN=Cpt1c PE=1 SV   | 1.3784461 | 1  | 1  | 1  | 89.972 | 7.49 | 1500000  |          |          | 2.44   |
| Q6NS52 | Diacylglycerol kinase beta OS=Mus musculus GN=Dgkb PE=1 SV=2                         | 1.7456359 | 1  | 2  | 1  | 90.213 | 7.93 | 1400000  |          | 1300000  | 5.66   |
| P20918 | Plasminogen OS=Mus musculus GN=Plg PE=1 SV=3                                         | 1.2315271 | 1  | 1  | 1  | 90.749 | 6.6  |          | 500000   |          | 0.00   |
| Q6NXX7 | Inactive dipeptidyl peptidase 10 OS=Mus musculus GN=Dpp10 PE=1 SV=1                  | 11.668758 | 9  | 21 | 9  | 90.769 | 6.48 | 6900000  | 2900000  | 9400000  | 53.38  |
| Q8C7M3 | E3 ubiquitin-protein ligase TRIM9 OS=Mus musculus GN=Trim9 PE=1 SV=2                 | 6.2423501 | 4  | 8  | 4  | 90.812 | 7.24 | 3000000  | 490000   | 2200000  | 22.39  |
| Q04750 | DNA topoisomerase 1 OS=Mus musculus GN=Top1 PE=1 SV=2                                | 7.6923077 | 5  | 8  | 5  | 90.819 | 9.33 | 2800000  |          | 1900000  | 20.21  |

|        |                                                                                        |           |    |    |    |        |      |          |          |          |        |
|--------|----------------------------------------------------------------------------------------|-----------|----|----|----|--------|------|----------|----------|----------|--------|
| Q9Z315 | U4/U6.U5 tri-snRNP-associated protein 1 OS=Mus musculus GN=Sart1 PE=1 SV=1             | 4.3424318 | 2  | 3  | 2  | 90.83  | 5.82 | 1900000  |          | 1200000  | 10.17  |
| Q9D5V5 | Cullin-5 OS=Mus musculus GN=Cul5 PE=1 SV=3                                             | 6.4102564 | 5  | 6  | 5  | 90.916 | 7.81 | 2400000  |          | 860000   | 15.63  |
| Q69ZK9 | Neuroigin-2 OS=Mus musculus GN=Nlgn2 PE=1 SV=2                                         | 9.9282297 | 6  | 17 | 5  | 90.932 | 6.18 | 8100000  | 5400000  | 10000000 | 48.81  |
| O35286 | Pre-mRNA-splicing factor ATP-dependent RNA helicase DHX15 OS=Mus musculus GN=          | 5.0314465 | 3  | 5  | 3  | 90.949 | 7.46 | 3800000  | 1000000  | 1900000  | 15.30  |
| Q8BYM5 | Neuroigin-3 OS=Mus musculus GN=Nlgn3 PE=1 SV=2                                         | 7.5151515 | 5  | 10 | 4  | 91.104 | 5.8  | 5900000  | 1300000  | 4900000  | 32.01  |
| Q6PHU5 | Sortilin OS=Mus musculus GN=Sort1 PE=1 SV=1                                            | 2.9090909 | 2  | 3  | 2  | 91.142 | 5.88 | 990000   | 390000   |          | 7.86   |
| Q9Z218 | Dipeptidyl aminopeptidase-like protein 6 OS=Mus musculus GN=Dpp6 PE=1 SV=1             | 21.641791 | 14 | 33 | 14 | 91.203 | 6.68 | 11000000 | 8000000  | 11000000 | 98.63  |
| P70188 | Kinesin-associated protein 3 OS=Mus musculus GN=Kifap3 PE=1 SV=1                       | 3.5308953 | 2  | 3  | 2  | 91.233 | 5.11 |          | 440000   | 680000   | 9.79   |
| Q8BLY2 | Probable threonine--tRNA ligase 2, cytoplasmic OS=Mus musculus GN=Tarsl2 PE=1 SV=      | 2.1518987 | 1  | 1  | 1  | 91.26  | 7.53 | 870000   |          |          | 3.34   |
| P22892 | AP-1 complex subunit gamma-1 OS=Mus musculus GN=Ap1g1 PE=1 SV=3                        | 4.0145985 | 2  | 2  | 2  | 91.292 | 6.8  | 1100000  |          | 950000   | 5.66   |
| Q8JZQ9 | Eukaryotic translation initiation factor 3 subunit B OS=Mus musculus GN=Eif3b PE=1 SV= | 18.181818 | 8  | 14 | 8  | 91.313 | 5.02 | 5100000  | 570000   | 3100000  | 43.63  |
| Q61220 | Protein kinase C-binding protein NELL2 OS=Mus musculus GN=Nell2 PE=1 SV=3              | 2.3199023 | 2  | 2  | 2  | 91.369 | 5.82 |          |          | 3700000  | 4.61   |
| Q61165 | Sodium/hydrogen exchanger 1 OS=Mus musculus GN=Slc9a1 PE=1 SV=1                        | 2.0731707 | 1  | 1  | 1  | 91.41  | 7.12 | 1000000  |          |          | 3.81   |
| Q9R1V7 | Disintegrin and metalloproteinase domain-containing protein 23 OS=Mus musculus GN=A    | 7.1170084 | 4  | 13 | 4  | 91.488 | 7.68 | 2500000  | 2300000  | 1900000  | 36.49  |
| Q9EQH3 | Vacuolar protein sorting-associated protein 35 OS=Mus musculus GN=Vps35 PE=1 SV=1      | 11.432161 | 8  | 25 | 8  | 91.655 | 5.44 | 22000000 | 7600000  | 17000000 | 83.76  |
| Q61548 | Clathrin coat assembly protein AP180 OS=Mus musculus GN=Snap91 PE=1 SV=1               | 12.319645 | 11 | 38 | 10 | 91.794 | 4.88 | 52000000 | 21000000 | 37000000 | 113.06 |
| Q3UYV9 | Nuclear cap-binding protein subunit 1 OS=Mus musculus GN=Ncbp1 PE=1 SV=2               | 3.4177215 | 2  | 4  | 2  | 91.868 | 6.64 | 2100000  |          | 1100000  | 11.33  |
| Q9DBT5 | AMP deaminase 2 OS=Mus musculus GN=Ampd2 PE=1 SV=1                                     | 2.5062657 | 2  | 3  | 2  | 91.965 | 6.23 | 1500000  |          | 980000   | 7.55   |
| Q14CH0 | Protein FAM171B OS=Mus musculus GN=Fam171b PE=1 SV=2                                   | 2.5454545 | 1  | 1  | 1  | 91.988 | 8.37 | 850000   |          |          | 2.74   |
| Q6ZQ82 | Rho GTPase-activating protein 26 OS=Mus musculus GN=Arhgap26 PE=1 SV=3                 | 3.6855037 | 2  | 5  | 2  | 92.012 | 6.68 | 2000000  | 620000   | 1400000  | 16.04  |
| P15209 | BDNF/NT-3 growth factors receptor OS=Mus musculus GN=Ntrk2 PE=1 SV=1                   | 10.231425 | 6  | 13 | 6  | 92.074 | 6.55 | 6400000  | 5400000  | 7500000  | 39.48  |
| Q6A068 | Cell division cycle 5-like protein OS=Mus musculus GN=Cdc5l PE=1 SV=2                  | 5.9850374 | 3  | 7  | 3  | 92.133 | 8.02 | 2300000  |          | 1200000  | 20.06  |
| Q6ZQ18 | Protein EFR3 homolog B OS=Mus musculus GN=Efr3b PE=1 SV=2                              | 7.5887393 | 5  | 11 | 5  | 92.348 | 6.54 | 5900000  | 950000   | 3000000  | 30.98  |
| P08113 | Endoplasmic reticulum chaperone protein OS=Mus musculus GN=Hsp90b1 PE=1 SV=2           | 24.064838 | 17 | 48 | 15 | 92.418 | 4.82 | 22000000 | 10000000 | 21000000 | 158.61 |
| Q8VDO4 | GRIP1-associated protein 1 OS=Mus musculus GN=Gripap1 PE=1 SV=1                        | 11.042184 | 6  | 11 | 6  | 92.658 | 5.25 | 1900000  | 810000   | 2000000  | 38.10  |
| Q8BUY8 | G-protein coupled receptor-associated sorting protein 2 OS=Mus musculus GN=Grasp2      | 2.0581114 | 1  | 2  | 1  | 92.744 | 5.11 | 940000   |          |          | 7.30   |
| B2RUJ5 | Amyloid beta A4 precursor protein-binding family A member 1 OS=Mus musculus GN=Ap      | 7.4821853 | 5  | 9  | 4  | 92.851 | 4.88 | 2300000  | 610000   | 1800000  | 22.80  |
| P97366 | Ecotropic viral integration site 5 protein OS=Mus musculus GN=Evi5 PE=1 SV=2           | 1.3597033 | 1  | 1  | 1  | 92.884 | 6.16 |          |          |          | 2.48   |
| O35136 | Neural cell adhesion molecule 2 OS=Mus musculus GN=Ncam2 PE=1 SV=1                     | 21.983274 | 13 | 32 | 13 | 93.145 | 6.07 | 11000000 | 4000000  | 6300000  | 99.82  |
| Q3TDQ1 | Dolichyl-diphosphooligosaccharide--protein glycosyltransferase subunit STT3B OS=Mus r  | 2.308627  | 2  | 4  | 2  | 93.185 | 8.95 | 3100000  | 1300000  | 2600000  | 11.46  |
| Q8BJ71 | Nuclear pore complex protein Nup93 OS=Mus musculus GN=Nup93 PE=1 SV=1                  | 1.3431013 | 1  | 2  | 1  | 93.222 | 5.72 | 150000   |          | 610000   | 5.25   |
| P70175 | Disks large homolog 3 OS=Mus musculus GN=Dlg3 PE=1 SV=1                                | 10.365135 | 7  | 18 | 6  | 93.424 | 6.79 | 3800000  | 940000   | 3400000  | 52.58  |
| Q9JIK5 | Nucleolar RNA helicase 2 OS=Mus musculus GN=Ddx21 PE=1 SV=3                            | 0.9400705 | 1  | 1  | 1  | 93.493 | 9.11 |          | 19000000 |          | 1.96   |
| P18052 | Receptor-type tyrosine-protein phosphatase alpha OS=Mus musculus GN=Ptptra PE=1 SV     | 5.066345  | 4  | 7  | 4  | 93.638 | 7.05 | 1600000  |          | 1700000  | 17.55  |
| Q80WG5 | Volume-regulated anion channel subunit LRRC8A OS=Mus musculus GN=Lrrc8a PE=1 S         | 1.1111111 | 1  | 1  | 1  | 94.06  | 7.94 | 480000   |          |          | 2.18   |
| A6H5Z3 | Exocyst complex component 6B OS=Mus musculus GN=Exoc6b PE=1 SV=1                       | 4.1975309 | 2  | 2  | 2  | 94.07  | 6.39 | 1300000  |          |          | 5.55   |
| Q61316 | Heat shock 70 kDa protein 4 OS=Mus musculus GN=Hspa4 PE=1 SV=1                         | 33.174792 | 21 | 58 | 21 | 94.073 | 5.24 | 14000000 | 5800000  | 12000000 | 176.74 |
| E9Q6P5 | Tetratricopeptide repeat protein 7B OS=Mus musculus GN=Ttc7b PE=1 SV=1                 | 4.5077106 | 3  | 6  | 3  | 94.144 | 6.9  | 1500000  |          | 1300000  | 16.27  |
| Q6NS60 | F-box only protein 41 OS=Mus musculus GN=Fbxo41 PE=1 SV=3                              | 6.4146621 | 3  | 4  | 3  | 94.272 | 8.24 |          |          | 1700000  | 9.83   |
| Q80T74 | Kelch-like protein 29 OS=Mus musculus GN=Klhl29 PE=2 SV=3                              | 1.0285714 | 1  | 1  | 1  | 94.3   | 7.17 |          | 6400000  |          | 1.88   |
| P48722 | Heat shock 70 kDa protein 4L OS=Mus musculus GN=Hspa4l PE=1 SV=2                       | 26.849642 | 17 | 39 | 17 | 94.322 | 5.74 | 6800000  | 2300000  | 6400000  | 131.55 |
| Q6P5F6 | Zinc transporter ZIP10 OS=Mus musculus GN=Slc39a10 PE=1 SV=1                           | 4.3217287 | 3  | 7  | 3  | 94.335 | 6.71 | 2600000  | 930000   | 1700000  | 23.16  |
| Q8CCB4 | Vacuolar protein sorting-associated protein 53 homolog OS=Mus musculus GN=Vps53 PE     | 1.2019231 | 1  | 2  | 1  | 94.363 | 6.61 | 1500000  |          | 610000   | 4.95   |
| Q9DBY8 | Nuclear valosin-containing protein-like OS=Mus musculus GN=Nvl PE=1 SV=1               | 1.754386  | 1  | 2  | 1  | 94.417 | 6.35 |          |          |          | 5.01   |
| Q8K310 | Matrin-3 OS=Mus musculus GN=Matr3 PE=1 SV=1                                            | 19.267139 | 15 | 38 | 15 | 94.572 | 6.25 | 42000000 | 2100000  | 28000000 | 112.51 |
| O88703 | Potassium/sodium hyperpolarization-activated cyclic nucleotide-gated channel 2 OS=Mus  | 2.0857474 | 1  | 3  | 1  | 94.661 | 8.73 | 1500000  | 430000   | 1100000  | 8.92   |
| Q9ER72 | Cysteine--tRNA ligase, cytoplasmic OS=Mus musculus GN=Cars PE=1 SV=2                   | 1.8050542 | 1  | 2  | 1  | 94.8   | 6.76 | 2700000  | 650000   |          | 7.21   |
| Q91XM9 | Disks large homolog 2 OS=Mus musculus GN=Dlg2 PE=1 SV=2                                | 23.004695 | 15 | 40 | 14 | 94.821 | 6.24 | 16000000 | 1100000  | 16000000 | 122.12 |

|        |                                                                                                         |           |    |     |    |        |      |           |          |          |        |
|--------|---------------------------------------------------------------------------------------------------------|-----------|----|-----|----|--------|------|-----------|----------|----------|--------|
| Q6P542 | ATP-binding cassette sub-family F member 1 OS=Mus musculus GN=Abcf1 PE=1 SV=1                           | 4.0621266 | 2  | 4   | 2  | 94.887 | 6.51 | 1400000   |          | 1200000  | 13.92  |
| P58252 | Elongation factor 2 OS=Mus musculus GN=Eef2 PE=1 SV=2                                                   | 21.212121 | 16 | 43  | 15 | 95.253 | 6.83 | 21000000  | 3500000  | 11000000 | 118.59 |
| Q3UNH4 | G protein-regulated inducer of neurite outgrowth 1 OS=Mus musculus GN=Gprin1 PE=1 SV=1                  | 26.39485  | 20 | 48  | 20 | 95.437 | 7.93 | 12000000  | 4600000  | 10000000 | 143.35 |
| Q8C079 | Striatin-interacting protein 1 OS=Mus musculus GN=Strip1 PE=1 SV=2                                      | 3.1063321 | 1  | 2   | 1  | 95.524 | 6.25 | 2200000   |          | 540000   | 7.61   |
| Q03717 | Potassium voltage-gated channel subfamily B member 1 OS=Mus musculus GN=Kcnb1 PE=1 SV=1                 | 1.4002334 | 1  | 2   | 1  | 95.53  | 8.16 | 3500000   |          | 1900000  | 5.93   |
| Q61361 | Brevican core protein OS=Mus musculus GN=Bcan PE=1 SV=2                                                 | 25.934315 | 20 | 84  | 20 | 95.755 | 4.93 | 45000000  | 34000000 | 57000000 | 263.43 |
| P56399 | Ubiquitin carboxyl-terminal hydrolase 5 OS=Mus musculus GN=Usp5 PE=1 SV=1                               | 15.850816 | 10 | 23  | 10 | 95.772 | 5.01 | 8000000   | 2200000  | 7500000  | 65.68  |
| Q14BI2 | Metabotropic glutamate receptor 2 OS=Mus musculus GN=Grm2 PE=1 SV=2                                     | 7.1100917 | 5  | 8   | 4  | 95.826 | 8.06 | 11000000  | 1400000  | 3700000  | 22.16  |
| Q4KMM3 | Oxidation resistance protein 1 OS=Mus musculus GN=Oxr1 PE=1 SV=3                                        | 25.635104 | 16 | 37  | 16 | 95.852 | 5.33 | 9600000   | 3100000  | 10000000 | 131.24 |
| P08553 | Neurofilament medium polypeptide OS=Mus musculus GN=Nefm PE=1 SV=4                                      | 40.330189 | 31 | 85  | 27 | 95.859 | 4.77 | 22000000  | 5000000  | 31000000 | 249.53 |
| Q9Z1X4 | Interleukin enhancer-binding factor 3 OS=Mus musculus GN=Ilf3 PE=1 SV=2                                 | 11.469933 | 7  | 12  | 7  | 95.961 | 8.76 | 3800000   |          | 2200000  | 36.34  |
| Q9WU78 | Programmed cell death 6-interacting protein OS=Mus musculus GN=Pcdc6ip PE=1 SV=3                        | 2.9919448 | 2  | 3   | 2  | 95.964 | 6.52 | 1100000   |          | 550000   | 6.28   |
| P58069 | Ras GTPase-activating protein 2 OS=Mus musculus GN=Rasa2 PE=1 SV=2                                      | 1.2987013 | 1  | 1   | 1  | 96.34  | 7.59 |           |          |          | 2.08   |
| Q61699 | Heat shock protein 105 kDa OS=Mus musculus GN=Hsph1 PE=1 SV=2                                           | 23.659674 | 13 | 36  | 13 | 96.346 | 5.53 | 7100000   | 1800000  | 5300000  | 107.60 |
| Q7TSJ2 | Microtubule-associated protein 6 OS=Mus musculus GN=Map6 PE=1 SV=2                                      | 43.156733 | 30 | 100 | 30 | 96.391 | 9.5  | 26000000  | 8500000  | 17000000 | 343.21 |
| Q9Z1G4 | V-type proton ATPase 116 kDa subunit a isoform 1 OS=Mus musculus GN=Atp6v0a1 PE=1 SV=1                  | 22.169249 | 17 | 69  | 17 | 96.404 | 6.76 | 110000000 | 29000000 | 65000000 | 226.14 |
| Q8CI94 | Glycogen phosphorylase, brain form OS=Mus musculus GN=Pygb PE=1 SV=3                                    | 28.113879 | 20 | 50  | 15 | 96.668 | 6.73 | 32000000  | 10000000 | 16000000 | 138.44 |
| Q8K4G5 | Actin-binding LIM protein 1 OS=Mus musculus GN=Ablim1 PE=1 SV=1                                         | 2.0905923 | 2  | 3   | 2  | 96.743 | 8.63 | 6800000   |          | 1100000  | 7.25   |
| Q62165 | Dystroglycan OS=Mus musculus GN=Dag1 PE=1 SV=4                                                          | 4.5912654 | 3  | 11  | 3  | 96.844 | 8.44 | 2100000   | 2200000  | 2400000  | 26.60  |
| Q3URD3 | Sarcolemmal membrane-associated protein OS=Mus musculus GN=Slmap PE=1 SV=2                              | 2.2485207 | 2  | 2   | 2  | 96.873 | 5.33 | 1700000   |          | 200000   | 4.51   |
| Q60625 | Intercellular adhesion molecule 5 OS=Mus musculus GN=Icam5 PE=1 SV=2                                    | 13.522356 | 9  | 26  | 9  | 96.885 | 6.32 | 9400000   | 7000000  | 13000000 | 79.51  |
| Q9ES28 | Rho guanine nucleotide exchange factor 7 OS=Mus musculus GN=Arhgef7 PE=1 SV=2                           | 4.4083527 | 3  | 6   | 3  | 96.995 | 6.8  | 2600000   | 1600000  | 4500000  | 17.96  |
| P70168 | Importin subunit beta-1 OS=Mus musculus GN=Kpnb1 PE=1 SV=2                                              | 11.415525 | 8  | 18  | 8  | 97.122 | 4.78 | 4600000   | 1100000  | 2900000  | 48.32  |
| Q8BZ98 | Dynamin-3 OS=Mus musculus GN=Dnm3 PE=1 SV=1                                                             | 18.308227 | 16 | 45  | 9  | 97.13  | 8.35 | 11000000  | 3800000  | 6300000  | 129.36 |
| Q9WUB3 | Glycogen phosphorylase, muscle form OS=Mus musculus GN=Pygm PE=1 SV=3                                   | 14.845606 | 11 | 24  | 6  | 97.225 | 7.11 | 6700000   | 1600000  | 2800000  | 63.81  |
| B0F2B4 | Neuroigin 4-like OS=Mus musculus GN=Nlgn4l PE=1 SV=1                                                    | 3.5978836 | 3  | 5   | 2  | 97.287 | 6.32 | 2100000   | 1700000  | 1800000  | 13.01  |
| Q4V9Z5 | Seizure 6-like protein 2 OS=Mus musculus GN=Sez6l2 PE=1 SV=1                                            | 7.4725275 | 4  | 12  | 4  | 97.442 | 4.87 | 3200000   | 2500000  | 2900000  | 38.10  |
| Q9QZE5 | Coatamer subunit gamma-1 OS=Mus musculus GN=Copg1 PE=1 SV=1                                             | 2.0594966 | 1  | 2   | 1  | 97.45  | 5.35 | 1500000   |          | 1000000  | 6.51   |
| Q5SSL4 | Active breakpoint cluster region-related protein OS=Mus musculus GN=Abr PE=1 SV=1                       | 6.9848661 | 4  | 8   | 4  | 97.605 | 6.58 | 3800000   | 810000   | 3300000  | 25.68  |
| Q9QXK3 | Coatamer subunit gamma-2 OS=Mus musculus GN=Copg2 PE=1 SV=1                                             | 1.9517796 | 1  | 2   | 1  | 97.617 | 5.8  | 2000000   |          | 1100000  | 6.29   |
| P39053 | Dynamin-1 OS=Mus musculus GN=Dnm1 PE=1 SV=2                                                             | 49.365629 | 41 | 163 | 34 | 97.741 | 7.74 | 140000000 | 64000000 | 93000000 | 508.06 |
| Q8VHH5 | Arf-GAP with GTPase, ANK repeat and PH domain-containing protein 3 OS=Mus musculus GN=Arfgap3 PE=1 SV=1 | 2.967033  | 2  | 6   | 2  | 97.905 | 7.75 | 3400000   | 1600000  | 2900000  | 20.50  |
| P28271 | Cytoplasmic aconitate hydratase OS=Mus musculus GN=Aco1 PE=1 SV=3                                       | 2.4746907 | 1  | 1   | 1  | 98.063 | 7.5  |           |          |          | 2.89   |
| Q9Z2H5 | Band 4.1-like protein 1 OS=Mus musculus GN=Epb41l1 PE=1 SV=2                                            | 22.639363 | 13 | 29  | 13 | 98.254 | 5.62 | 11000000  | 1100000  | 6300000  | 87.30  |
| O54931 | A-kinase anchor protein 2 OS=Mus musculus GN=Akap2 PE=1 SV=3                                            | 1.1198208 | 1  | 2   | 1  | 98.519 | 5.21 | 720000    |          | 710000   | 4.19   |
| P23819 | Glutamate receptor 2 OS=Mus musculus GN=Gria2 PE=1 SV=3                                                 | 22.083805 | 17 | 49  | 15 | 98.599 | 7.39 | 20000000  | 6800000  | 15000000 | 144.81 |
| Q8R0Y6 | Cytosolic 10-formyltetrahydrofolate dehydrogenase OS=Mus musculus GN=Aldh1l1 PE=1 SV=1                  | 13.192905 | 9  | 18  | 9  | 98.647 | 5.91 | 8700000   | 1200000  | 3600000  | 55.68  |
| Q8K1S4 | Netrin receptor UNC5A OS=Mus musculus GN=Unc5a PE=1 SV=1                                                | 1.8930958 | 1  | 1   | 1  | 98.794 | 6.92 | 990000    |          |          | 3.50   |
| Q9QYS2 | Metabotropic glutamate receptor 3 OS=Mus musculus GN=Grm3 PE=1 SV=1                                     | 9.556314  | 7  | 20  | 6  | 99.05  | 7.75 | 6400000   | 1900000  | 4000000  | 57.25  |
| Q80YR4 | Zinc finger protein 598 OS=Mus musculus GN=Znf598 PE=1 SV=1                                             | 3.6343612 | 2  | 2   | 2  | 99.13  | 8.34 | 190000    |          |          | 5.28   |
| Q7TSQ8 | Pyruvate dehydrogenase phosphatase regulatory subunit, mitochondrial OS=Mus musculus GN=Pdhfr PE=1 SV=1 | 2.7334852 | 2  | 3   | 2  | 99.167 | 6.35 | 1400000   | 520000   | 1700000  | 8.19   |
| Q60902 | Epidermal growth factor receptor substrate 15-like 1 OS=Mus musculus GN=Eps15l1 PE=1 SV=1               | 19.294377 | 14 | 32  | 14 | 99.248 | 5.02 | 2900000   | 2200000  | 3300000  | 94.45  |
| O35551 | Rab GTPase-binding effector protein 1 OS=Mus musculus GN=Rabep1 PE=1 SV=2                               | 2.4361949 | 2  | 2   | 2  | 99.462 | 5.01 | 380000    |          | 1200000  | 5.38   |
| Q8CC35 | Synaptopodin OS=Mus musculus GN=Synpo PE=1 SV=2                                                         | 7.8579117 | 4  | 9   | 4  | 99.49  | 9.42 | 8900000   | 2800000  | 5700000  | 32.89  |
| B2RY56 | RNA-binding protein 25 OS=Mus musculus GN=Rbm25 PE=1 SV=2                                               | 10.023866 | 5  | 7   | 5  | 99.491 | 6.32 | 2000000   |          | 1200000  | 21.60  |
| Q9R1V6 | Disintegrin and metalloproteinase domain-containing protein 22 OS=Mus musculus GN=Adam22 PE=1 SV=1      | 15.044248 | 11 | 30  | 11 | 99.651 | 7.83 | 11000000  | 3200000  | 10000000 | 92.72  |
| P15116 | Cadherin-2 OS=Mus musculus GN=Cdh2 PE=1 SV=2                                                            | 8.388521  | 5  | 10  | 5  | 99.734 | 4.78 | 9100000   | 1600000  | 9200000  | 37.47  |
| O08759 | Ubiquitin-protein ligase E3A OS=Mus musculus GN=Ube3a PE=1 SV=2                                         | 2.6436782 | 2  | 4   | 2  | 99.756 | 5.08 | 2700000   | 1000000  | 2100000  | 10.65  |

|         |                                                                                                |           |    |     |    |         |      |          |          |          |  |        |
|---------|------------------------------------------------------------------------------------------------|-----------|----|-----|----|---------|------|----------|----------|----------|--|--------|
| P26231  | Catenin alpha-1 OS=Mus musculus GN=Ctnna1 PE=1 SV=1                                            | 6.5121413 | 5  | 11  | 1  | 100.044 | 6.23 |          |          |          |  | 32.55  |
| Q811D0  | Disks large homolog 1 OS=Mus musculus GN=Dlg1 PE=1 SV=1                                        | 15.690608 | 10 | 23  | 8  | 100.058 | 5.8  | 10000000 | 3800000  | 5500000  |  | 69.05  |
| Q3UUVK0 | Endoplasmic reticulum metalloproteinase 1 OS=Mus musculus GN=Ermp1 PE=1 SV=2                   | 1.2249443 | 1  | 1   | 1  | 100.084 | 7.49 | 1400000  |          |          |  | 2.13   |
| Q8VDM4  | 26S proteasome non-ATPase regulatory subunit 2 OS=Mus musculus GN=Psm2 PE=1 SV=1               | 7.9295154 | 6  | 17  | 6  | 100.139 | 5.17 | 3400000  | 1500000  | 3700000  |  | 56.07  |
| Q80XR2  | Calcium-transporting ATPase type 2C member 1 OS=Mus musculus GN=Atp2c1 PE=1 SV=1               | 1.1982571 | 1  | 1   | 1  | 100.234 | 6.83 | 850000   |          |          |  | 2.99   |
| Q9WU40  | Inner nuclear membrane protein Man1 OS=Mus musculus GN=Lemd3 PE=1 SV=2                         | 5.4288817 | 3  | 4   | 3  | 100.244 | 7.55 | 520000   |          | 170000   |  | 15.25  |
| Q99MR6  | Serrate RNA effector molecule homolog OS=Mus musculus GN=Srrt PE=1 SV=1                        | 3.8857143 | 3  | 4   | 3  | 100.39  | 5.97 | 5100000  |          | 3000000  |  | 10.76  |
| Q99LG2  | Transportin-2 OS=Mus musculus GN=Tnpo2 PE=1 SV=1                                               | 1.1273957 | 1  | 1   | 1  | 100.391 | 4.98 | 680000   |          |          |  | 2.19   |
| Q8R3Q2  | Serine/threonine-protein phosphatase 6 regulatory subunit 2 OS=Mus musculus GN=Ppp1            | 1.7334778 | 1  | 1   | 1  | 100.397 | 4.82 | 1200000  |          |          |  | 3.52   |
| Q9Z2W9  | Glutamate receptor 3 OS=Mus musculus GN=Gria3 PE=1 SV=2                                        | 8.2207207 | 6  | 18  | 4  | 100.463 | 8.38 | 7000000  | 2600000  | 4900000  |  | 54.04  |
| P56695  | Wolframin OS=Mus musculus GN=Wfs1 PE=1 SV=1                                                    | 3.8202247 | 3  | 7   | 3  | 100.514 | 7.97 | 3800000  | 6500000  | 11000000 |  | 19.40  |
| Q8K596  | Sodium/calcium exchanger 2 OS=Mus musculus GN=Slc8a2 PE=1 SV=1                                 | 18.023887 | 13 | 49  | 12 | 100.647 | 5.12 | 28000000 | 14000000 | 20000000 |  | 151.79 |
| Q9D2V7  | Coronin-7 OS=Mus musculus GN=Coro7 PE=1 SV=2                                                   | 1.7353579 | 1  | 3   | 1  | 100.749 | 5.77 | 3200000  | 1400000  | 3300000  |  | 7.27   |
| Q9Z2W8  | Glutamate receptor 4 OS=Mus musculus GN=Gria4 PE=1 SV=2                                        | 4.2128603 | 3  | 7   | 1  | 100.782 | 8.07 |          |          |          |  | 23.42  |
| Q8CCN5  | Breast carcinoma-amplified sequence 3 homolog OS=Mus musculus GN=Bcas3 PE=1 SV=1               | 2.0474138 | 1  | 1   | 1  | 100.957 | 6.7  | 500000   |          |          |  | 2.57   |
| Q80WT5  | Aftiphilin OS=Mus musculus GN=Aftph PE=1 SV=2                                                  | 3.7593985 | 2  | 2   | 2  | 101.068 | 4.5  | 590000   |          |          |  | 6.91   |
| Q922D8  | C-1-tetrahydrofolate synthase, cytoplasmic OS=Mus musculus GN=Mthfd1 PE=1 SV=4                 | 8.4491979 | 7  | 12  | 7  | 101.136 | 7.14 | 3400000  | 1300000  | 2300000  |  | 28.51  |
| Q6PE13  | Proline-rich transmembrane protein 3 OS=Mus musculus GN=Prnt3 PE=1 SV=1                        | 1.4418126 | 1  | 1   | 1  | 101.162 | 7.52 |          | 1400000  |          |  | 2.98   |
| B9EJ86  | Oxysterol-binding protein-related protein 8 OS=Mus musculus GN=Osbp8 PE=1 SV=1                 | 1.2373453 | 1  | 1   | 1  | 101.205 | 6.96 | 3000000  |          |          |  | 2.46   |
| Q5QNK6  | Oxysterol-binding protein 2 OS=Mus musculus GN=Osbp2 PE=1 SV=1                                 | 1.3215859 | 1  | 1   | 1  | 101.289 | 7.14 | 850000   |          |          |  | 2.14   |
| Q6PF93  | Phosphatidylinositol 3-kinase catalytic subunit type 3 OS=Mus musculus GN=Pik3c3 PE=1 SV=1     | 1.8038331 | 1  | 3   | 1  | 101.423 | 6.73 | 1500000  | 430000   | 1100000  |  | 8.36   |
| P23818  | Glutamate receptor 1 OS=Mus musculus GN=Gria1 PE=1 SV=1                                        | 5.9536935 | 5  | 10  | 3  | 101.504 | 7.69 | 6000000  | 1300000  | 4100000  |  | 28.51  |
| Q68EF4  | Metabotropic glutamate receptor 4 OS=Mus musculus GN=Grm4 PE=1 SV=2                            | 1.3157895 | 1  | 2   | 1  | 101.758 | 8.82 | 320000   |          |          |  | 4.83   |
| Q8R3S6  | Exocyst complex component 1 OS=Mus musculus GN=Exoc1 PE=1 SV=4                                 | 2.2371365 | 2  | 3   | 2  | 101.825 | 6.52 | 1400000  | 850000   |          |  | 4.68   |
| Q810A7  | ATP-dependent RNA helicase DDX42 OS=Mus musculus GN=Ddx42 PE=1 SV=3                            | 3.0139935 | 2  | 2   | 2  | 101.902 | 6.98 | 2100000  |          |          |  | 6.02   |
| Q78PY7  | Staphylococcal nuclease domain-containing protein 1 OS=Mus musculus GN=Snd1 PE=1 SV=1          | 9.7802198 | 7  | 14  | 7  | 102.025 | 7.43 | 6500000  | 1100000  | 2000000  |  | 39.76  |
| Q62448  | Eukaryotic translation initiation factor 4 gamma 2 OS=Mus musculus GN=Eif4g2 PE=1 SV=1         | 3.3112583 | 2  | 2   | 2  | 102.041 | 7.14 | 2300000  |          |          |  | 4.90   |
| Q68ED2  | Metabotropic glutamate receptor 7 OS=Mus musculus GN=Grm7 PE=1 SV=1                            | 1.0928962 | 1  | 1   | 1  | 102.153 | 7.88 | 1500000  |          |          |  | 2.86   |
| Q80TZ3  | Putative tyrosine-protein phosphatase auxilin OS=Mus musculus GN=Dnajc6 PE=1 SV=2              | 8.7420043 | 7  | 17  | 7  | 102.235 | 7.23 | 7500000  | 1400000  | 4100000  |  | 45.92  |
| Q8CGF6  | WD repeat-containing protein 47 OS=Mus musculus GN=Wdr47 PE=1 SV=2                             | 8.3695652 | 5  | 8   | 5  | 102.247 | 5.97 | 2300000  | 870000   | 1800000  |  | 23.79  |
| Q88704  | Potassium/sodium hyperpolarization-activated cyclic nucleotide-gated channel 1 OS=Mus musculus | 2.1978022 | 1  | 1   | 1  | 102.366 | 8.37 |          |          | 420000   |  | 4.06   |
| O55029  | Coatomer subunit beta' OS=Mus musculus GN=Copb2 PE=1 SV=2                                      | 4.5303867 | 3  | 3   | 3  | 102.384 | 5.3  |          | 630000   | 1000000  |  | 7.34   |
| P39087  | Glutamate receptor ionotropic, kainate 2 OS=Mus musculus GN=Grik2 PE=1 SV=4                    | 3.0837004 | 2  | 2   | 2  | 102.42  | 7.77 | 600000   |          | 940000   |  | 3.98   |
| P46935  | E3 ubiquitin-protein ligase NEDD4 OS=Mus musculus GN=Nedd4 PE=1 SV=3                           | 7.5535513 | 5  | 11  | 4  | 102.642 | 5.26 | 4200000  | 800000   | 1100000  |  | 35.23  |
| Q8VDP4  | Cell cycle and apoptosis regulator protein 2 OS=Mus musculus GN=Ccar2 PE=1 SV=2                | 9.6529284 | 5  | 10  | 5  | 102.938 | 5.25 | 5600000  | 1100000  | 1600000  |  | 34.59  |
| Q7TPR4  | Alpha-actinin-1 OS=Mus musculus GN=Actn1 PE=1 SV=1                                             | 45.73991  | 34 | 133 | 18 | 103.004 | 5.38 | 26000000 | 14000000 | 28000000 |  | 439.20 |
| Q9EQQ9  | Protein O-GlcNAcase OS=Mus musculus GN=Mgea5 PE=1 SV=2                                         | 2.7292576 | 2  | 3   | 2  | 103.096 | 4.92 | 2100000  | 1300000  | 1800000  |  | 8.82   |
| Q921G8  | Gamma-tubulin complex component 2 OS=Mus musculus GN=Tubgcp2 PE=1 SV=2                         | 1.878453  | 1  | 1   | 1  | 103.157 | 6.77 | 420000   |          |          |  | 2.11   |
| Q922S4  | cGMP-dependent 3',5'-cyclic phosphodiesterase OS=Mus musculus GN=Pde2a PE=1 SV=1               | 11.353712 | 9  | 21  | 9  | 103.183 | 5.38 | 11000000 | 3100000  | 8800000  |  | 73.28  |
| Q11011  | Puromycin-sensitive aminopeptidase OS=Mus musculus GN=Npepps PE=1 SV=2                         | 4.5652174 | 4  | 8   | 4  | 103.26  | 5.9  | 3600000  | 1400000  | 4100000  |  | 22.25  |
| Q9WV92  | Band 4.1-like protein 3 OS=Mus musculus GN=Epb41i3 PE=1 SV=1                                   | 35.306781 | 26 | 76  | 23 | 103.274 | 5.31 | 43000000 | 11000000 | 33000000 |  | 243.70 |
| Q3UHH0  | AP2-associated protein kinase 1 OS=Mus musculus GN=Aak1 PE=1 SV=2                              | 31.178311 | 18 | 42  | 18 | 103.282 | 6.7  | 16000000 | 5600000  | 13000000 |  | 151.62 |
| Q6NZL0  | Protein SOGA3 OS=Mus musculus GN=Soga3 PE=1 SV=2                                               | 12.169312 | 10 | 20  | 10 | 103.416 | 6.14 | 5700000  | 2400000  | 4700000  |  | 57.60  |
| Q8K1A6  | Coiled-coil and C2 domain-containing protein 1A OS=Mus musculus GN=Cc2d1a PE=1 SV=1            | 0.9544008 | 1  | 1   | 1  | 103.634 | 7.84 | 520000   |          |          |  | 2.08   |
| Q9J191  | Alpha-actinin-2 OS=Mus musculus GN=Actn2 PE=1 SV=2                                             | 15.100671 | 12 | 32  | 1  | 103.768 | 5.45 | 1900000  | 690000   | 2400000  |  | 104.40 |
| Q9ES97  | Reticulon-3 OS=Mus musculus GN=Rtn3 PE=1 SV=2                                                  | 32.883817 | 22 | 51  | 21 | 103.814 | 4.92 | 32000000 | 9300000  | 38000000 |  | 148.17 |
| O35643  | AP-1 complex subunit beta-1 OS=Mus musculus GN=Ap1b1 PE=1 SV=2                                 | 20.148462 | 18 | 49  | 6  | 103.869 | 5.17 | 12000000 | 1900000  | 8700000  |  | 140.38 |
| Q9D4H1  | Exocyst complex component 2 OS=Mus musculus GN=Exoc2 PE=1 SV=1                                 | 5.952381  | 5  | 5   | 5  | 103.894 | 7.18 | 2000000  |          |          |  | 14.57  |

|        |                                                                                            |           |    |     |    |         |       |          |          |          |         |        |
|--------|--------------------------------------------------------------------------------------------|-----------|----|-----|----|---------|-------|----------|----------|----------|---------|--------|
| Q0GA42 | Metal transporter CNNM1 OS=Mus musculus GN=Cnnm1 PE=1 SV=5                                 | 1.4721346 | 1  | 1   | 1  | 103.915 | 6.51  | 1700000  |          |          |         | 3.54   |
| P17427 | AP-2 complex subunit alpha-2 OS=Mus musculus GN=Ap2a2 PE=1 SV=2                            | 25.799574 | 22 | 61  | 16 | 103.951 | 6.93  | 20000000 | 7800000  | 10000000 |         | 167.44 |
| Q80UP3 | Diacylglycerol kinase zeta OS=Mus musculus GN=Dgkz PE=1 SV=2                               | 3.444564  | 2  | 3   | 2  | 103.965 | 8.09  | 4800000  |          |          | 1800000 | 8.96   |
| Q6NVF0 | Inositol polyphosphate 5-phosphatase OCRL-1 OS=Mus musculus GN=Ocr1 PE=1 SV=1              | 0.8888889 | 1  | 1   | 1  | 104.219 | 6.27  |          |          |          |         | 1.89   |
| Q3UUQ7 | GPI inositol-deacylase OS=Mus musculus GN=Pgap1 PE=1 SV=3                                  | 1.1930586 | 1  | 1   | 1  | 104.511 | 8.91  | 1800000  |          |          |         | 2.77   |
| Q9DBG3 | AP-2 complex subunit beta OS=Mus musculus GN=Ap2b1 PE=1 SV=1                               | 31.376734 | 25 | 72  | 13 | 104.516 | 5.38  | 38000000 | 13000000 | 27000000 |         | 204.72 |
| Q6P1D5 | Seizure 6-like protein OS=Mus musculus GN=Sez6l PE=1 SV=1                                  | 1.5576324 | 1  | 1   | 1  | 104.76  | 4.69  |          | 920000   |          |         | 3.44   |
| Q8K212 | Phosphofurin acidic cluster sorting protein 1 OS=Mus musculus GN=Pacs1 PE=1 SV=2           | 11.550468 | 8  | 16  | 8  | 104.764 | 7.74  | 10000000 | 8800000  | 3100000  |         | 32.85  |
| P58501 | PAX3- and PAX7-binding protein 1 OS=Mus musculus GN=Paxbp1 PE=1 SV=3                       | 1.6322089 | 1  | 1   | 1  | 104.771 | 5.67  | 610000   |          |          |         | 3.17   |
| P30999 | Catenin delta-1 OS=Mus musculus GN=Ctnnd1 PE=1 SV=2                                        | 3.6247335 | 3  | 5   | 3  | 104.86  | 6.87  | 1800000  |          |          | 2500000 | 13.33  |
| Q3UMB5 | Smith-Magenis syndrome chromosomal region candidate gene 8 protein homolog OS=Mus musculus | 2.9946524 | 2  | 4   | 2  | 104.891 | 5.4   | 1000000  |          |          | 1100000 | 9.17   |
| P57780 | Alpha-actinin-4 OS=Mus musculus GN=Actn4 PE=1 SV=1                                         | 45.394737 | 36 | 131 | 22 | 104.911 | 5.41  | 17000000 | 8800000  | 21000000 |         | 424.18 |
| P98203 | Armadillo repeat protein deleted in velo-cardio-facial syndrome homolog OS=Mus musculus    | 1.8711019 | 1  | 1   | 1  | 105.002 | 6.64  |          |          |          | 1900000 | 3.25   |
| D3YXK2 | Scaffold attachment factor B1 OS=Mus musculus GN=Safb PE=1 SV=2                            | 18.036286 | 10 | 21  | 10 | 105.04  | 5.35  | 7900000  |          |          | 4800000 | 68.57  |
| O70589 | Peripheral plasma membrane protein CASK OS=Mus musculus GN=Cask PE=1 SV=2                  | 5.075594  | 4  | 7   | 4  | 105.042 | 6.43  | 5400000  |          |          | 3800000 | 16.35  |
| Q61301 | Catenin alpha-2 OS=Mus musculus GN=Ctnna2 PE=1 SV=3                                        | 22.035677 | 20 | 52  | 16 | 105.22  | 5.71  | 12000000 | 2000000  | 9100000  |         | 149.42 |
| Q99K46 | Ubiquitin carboxyl-terminal hydrolase 11 OS=Mus musculus GN=Usp11 PE=1 SV=4                | 4.3431053 | 2  | 4   | 2  | 105.318 | 4.96  | 1200000  |          |          | 560000  | 13.28  |
| P35438 | Glutamate receptor ionotropic, NMDA 1 OS=Mus musculus GN=Grin1 PE=1 SV=1                   | 5.1172708 | 5  | 8   | 5  | 105.414 | 8.84  | 6000000  | 2200000  | 4800000  |         | 19.24  |
| Q3UTQ8 | Cyclin-dependent kinase-like 5 OS=Mus musculus GN=Cdkl5 PE=1 SV=1                          | 3.9445629 | 3  | 3   | 3  | 105.425 | 9.58  | 440000   |          |          | 3400000 | 7.59   |
| Q8R1B4 | Eukaryotic translation initiation factor 3 subunit C OS=Mus musculus GN=Elf3c PE=1 SV=     | 8.1229418 | 6  | 10  | 6  | 105.465 | 5.78  | 4400000  |          |          | 3000000 | 31.76  |
| Q9EPW0 | Type I inositol 3,4-bisphosphate 4-phosphatase OS=Mus musculus GN=Inpp4a PE=1 SV=          | 7.028754  | 5  | 12  | 5  | 105.472 | 7.05  | 2400000  | 650000   | 1500000  |         | 32.30  |
| Q80T41 | Gamma-aminobutyric acid type B receptor subunit 2 OS=Mus musculus GN=Gabbr2 PE=            | 7.5531915 | 6  | 10  | 6  | 105.599 | 8.72  | 3300000  | 520000   | 2500000  |         | 25.56  |
| Q0P678 | Zinc finger CCCH domain-containing protein 18 OS=Mus musculus GN=Zc3h18 PE=1 SV=           | 8.1223629 | 3  | 4   | 3  | 105.631 | 7.8   | 1900000  |          |          | 1400000 | 14.62  |
| Q3V3R1 | Monofunctional C1-tetrahydrofolate synthase, mitochondrial OS=Mus musculus GN=Mthf         | 10.030706 | 9  | 12  | 9  | 105.662 | 7.02  | 2300000  |          |          | 1700000 | 29.44  |
| Q3TXS7 | 26S proteasome non-ATPase regulatory subunit 1 OS=Mus musculus GN=Psm1 PE=1 SV=            | 14.900315 | 10 | 20  | 10 | 105.663 | 5.39  | 4300000  | 830000   | 3400000  |         | 59.01  |
| Q8CGK3 | Lon protease homolog, mitochondrial OS=Mus musculus GN=Lonp1 PE=1 SV=2                     | 10.32666  | 7  | 15  | 7  | 105.776 | 6.57  | 5400000  | 4000000  | 4300000  |         | 49.21  |
| Q99JH7 | Calsynenin-3 OS=Mus musculus GN=Clstn3 PE=1 SV=1                                           | 2.1966527 | 1  | 1   | 1  | 105.805 | 5.34  |          |          |          | 1500000 | 2.89   |
| Q6PFD5 | Disks large-associated protein 3 OS=Mus musculus GN=Dlgap3 PE=1 SV=1                       | 9.9283521 | 8  | 13  | 8  | 105.808 | 8.76  | 7400000  |          |          | 4000000 | 35.63  |
| Q8K019 | Bcl-2-associated transcription factor 1 OS=Mus musculus GN=Bclaf1 PE=1 SV=2                | 8.8139282 | 6  | 16  | 5  | 105.939 | 9.99  | 5100000  |          |          | 4100000 | 46.94  |
| Q8CGZ0 | Calcium homeostasis endoplasmic reticulum protein OS=Mus musculus GN=Cherp PE=1            | 1.4957265 | 1  | 1   | 1  | 106.102 | 9.14  | 970000   |          |          |         | 3.49   |
| Q8K1S2 | Netrin receptor UNC5D OS=Mus musculus GN=Unc5d PE=1 SV=1                                   | 1.6736402 | 1  | 3   | 1  | 106.284 | 6.14  | 350000   |          |          | 750000  | 8.13   |
| Q3UHE1 | Membrane-associated phosphatidylinositol transfer protein 3 OS=Mus musculus GN=Pitp        | 2.0533881 | 1  | 1   | 1  | 106.395 | 7.12  | 820000   |          |          |         | 3.39   |
| Q80TQ2 | Ubiquitin carboxyl-terminal hydrolase CYLD OS=Mus musculus GN=Cyld PE=1 SV=2               | 1.2605042 | 1  | 1   | 1  | 106.517 | 5.63  |          |          |          | 880000  | 2.27   |
| P60755 | MAM domain-containing glycosylphosphatidylinositol anchor protein 2 OS=Mus musculus        | 1.1591149 | 1  | 2   | 1  | 106.622 | 7.02  |          | 660000   | 690000   |         | 3.72   |
| Q8BH74 | Nuclear pore complex protein Nup107 OS=Mus musculus GN=Nup107 PE=1 SV=1                    | 1.2958963 | 1  | 1   | 1  | 106.65  | 5.43  |          |          |          | 390000  | 2.73   |
| Q91YR7 | Pre-mRNA-processing factor 6 OS=Mus musculus GN=Prpf6 PE=1 SV=1                            | 5.6323061 | 5  | 7   | 5  | 106.655 | 8.09  | 1200000  |          |          | 540000  | 17.46  |
| Q7SIG6 | Arf-GAP with SH3 domain, ANK repeat and PH domain-containing protein 2 OS=Mus mus          | 3.5490605 | 2  | 3   | 2  | 106.738 | 6.65  | 1800000  |          |          | 730000  | 9.05   |
| Q52KI8 | Serine/arginine repetitive matrix protein 1 OS=Mus musculus GN=Srrm1 PE=1 SV=2             | 2.6427061 | 2  | 3   | 2  | 106.798 | 11.87 | 6600000  |          |          | 2800000 | 8.34   |
| Q8BGQ7 | Alanine--tRNA ligase, cytoplasmic OS=Mus musculus GN=Aars PE=1 SV=1                        | 4.6487603 | 4  | 10  | 4  | 106.841 | 5.67  | 4100000  | 1300000  | 3600000  |         | 28.93  |
| Q8BHN3 | Neutral alpha-glucosidase AB OS=Mus musculus GN=Ganab PE=1 SV=1                            | 7.6271186 | 5  | 8   | 5  | 106.844 | 6.06  | 2400000  | 2300000  | 2400000  |         | 26.60  |
| Q9Z1Z0 | General vesicular transport factor p115 OS=Mus musculus GN=Uso1 PE=1 SV=2                  | 18.769552 | 12 | 26  | 12 | 106.917 | 4.93  | 4400000  | 1000000  | 4100000  |         | 80.53  |
| Q9JIF7 | Coatamer subunit beta OS=Mus musculus GN=Copb1 PE=1 SV=1                                   | 5.5613851 | 4  | 5   | 4  | 106.998 | 6     | 2700000  | 1100000  | 1600000  |         | 12.35  |
| Q8K1R7 | Serine/threonine-protein kinase Nek9 OS=Mus musculus GN=Nek9 PE=1 SV=2                     | 1.4227642 | 1  | 1   | 1  | 107.075 | 5.63  |          |          |          |         | 3.20   |
| A2AJA9 | Uncharacterized protein C9orf172 homolog OS=Mus musculus GN=Gm996 PE=1 SV=1                | 6.3655031 | 5  | 9   | 5  | 107.119 | 9.11  | 2800000  |          |          | 2000000 | 22.90  |
| P17426 | AP-2 complex subunit alpha-1 OS=Mus musculus GN=Ap2a1 PE=1 SV=1                            | 28.249744 | 23 | 67  | 17 | 107.596 | 7.03  | 30000000 | 6800000  | 19000000 |         | 181.15 |
| Q91W86 | Vacuolar protein sorting-associated protein 11 homolog OS=Mus musculus GN=Vps11 PE=        | 1.1689692 | 1  | 2   | 1  | 107.65  | 7.01  | 1500000  |          |          | 1700000 | 5.81   |
| Q8R0S2 | IQ motif and SEC7 domain-containing protein 1 OS=Mus musculus GN=Iqsec1 PE=1 SV=           | 14.360042 | 12 | 21  | 9  | 107.948 | 7.14  | 26000000 | 32000000 | 17000000 |         | 54.93  |
| P70414 | Sodium/calcium exchanger 1 OS=Mus musculus GN=Slc8a1 PE=1 SV=1                             | 9.0721649 | 6  | 14  | 6  | 107.967 | 5     | 6600000  | 3500000  | 6500000  |         | 39.09  |

|        |                                                                                                               |           |    |     |    |         |       |           |           |           |        |
|--------|---------------------------------------------------------------------------------------------------------------|-----------|----|-----|----|---------|-------|-----------|-----------|-----------|--------|
| B1AZP2 | Disks large-associated protein 4 OS=Mus musculus GN=Dlgap4 PE=1 SV=1                                          | 6.8548387 | 5  | 12  | 4  | 107.97  | 7.08  | 4900000   | 770000    | 3900000   | 36.07  |
| Q569Z6 | Thyroid hormone receptor-associated protein 3 OS=Mus musculus GN=Thrap3 PE=1 SV=1                             | 10.304942 | 8  | 18  | 7  | 108.114 | 10.17 | 3800000   |           | 3600000   | 50.10  |
| Q9WV18 | Gamma-aminobutyric acid type B receptor subunit 1 OS=Mus musculus GN=Gabbr1 PE=1 SV=1                         | 5.8333333 | 5  | 8   | 5  | 108.147 | 8.21  | 4000000   |           | 3400000   | 21.20  |
| P17710 | Hexokinase-1 OS=Mus musculus GN=Hk1 PE=1 SV=3                                                                 | 30.800821 | 28 | 88  | 28 | 108.234 | 6.8   | 120000000 | 36000000  | 75000000  | 257.17 |
| P35123 | Ubiquitin carboxyl-terminal hydrolase 4 OS=Mus musculus GN=Usp4 PE=1 SV=3                                     | 2.4948025 | 1  | 2   | 1  | 108.274 | 5.64  | 940000    |           | 810000    | 8.59   |
| Q9DBR1 | 5'-3' exoribonuclease 2 OS=Mus musculus GN=Xrn2 PE=1 SV=1                                                     | 1.2618297 | 1  | 1   | 1  | 108.618 | 7.59  | 580000    |           |           | 2.93   |
| Q9EPL2 | Calsyntenin-1 OS=Mus musculus GN=Clstn1 PE=1 SV=1                                                             | 0.8171604 | 1  | 1   | 1  | 108.831 | 4.92  |           |           | 1800000   | 2.00   |
| Q8BG95 | Protein phosphatase 1 regulatory subunit 12B OS=Mus musculus GN=Ppp1r12b PE=1 SV=1                            | 7.6844262 | 5  | 10  | 4  | 108.984 | 5.74  | 1100000   | 530000    | 960000    | 31.66  |
| Q8BWQ6 | UPF0505 protein C16orf62 homolog OS=Mus musculus PE=1 SV=2                                                    | 1.3499481 | 1  | 1   | 1  | 109.007 | 7.31  | 620000    |           |           | 2.28   |
| P28738 | Kinesin heavy chain isoform 5C OS=Mus musculus GN=Kif5c PE=1 SV=3                                             | 19.246862 | 16 | 30  | 11 | 109.207 | 6.19  | 6100000   | 2400000   | 5100000   | 104.01 |
| O08810 | 116 kDa U5 small nuclear ribonucleoprotein component OS=Mus musculus GN=Eftud2 P=1 SV=1                       | 5.4582904 | 5  | 8   | 4  | 109.291 | 5     | 3200000   |           | 1300000   | 17.36  |
| Q61768 | Kinesin-1 heavy chain OS=Mus musculus GN=Kif5b PE=1 SV=3                                                      | 18.587747 | 14 | 22  | 9  | 109.484 | 6.44  | 1200000   | 210000    | 1400000   | 67.11  |
| Q9JL18 | Squamous cell carcinoma antigen recognized by T-cells 3 OS=Mus musculus GN=Sart3 F=1 SV=1                     | 3.950104  | 2  | 4   | 2  | 109.55  | 5.24  | 1400000   |           | 960000    | 14.64  |
| Q5DTT2 | PH and SEC7 domain-containing protein 1 OS=Mus musculus GN=Psd PE=1 SV=2                                      | 1.0742188 | 1  | 1   | 1  | 109.619 | 7.05  | 470000    |           |           | 2.05   |
| Q03137 | Ephrin type-A receptor 4 OS=Mus musculus GN=Epha4 PE=1 SV=2                                                   | 9.3306288 | 6  | 12  | 6  | 109.744 | 6.51  | 4500000   | 1600000   | 2800000   | 37.63  |
| P54763 | Ephrin type-B receptor 2 OS=Mus musculus GN=Ephb2 PE=1 SV=3                                                   | 1.8255578 | 1  | 1   | 1  | 109.828 | 5.71  |           |           | 680000    | 2.75   |
| O70318 | Band 4.1-like protein 2 OS=Mus musculus GN=Epb41l2 PE=1 SV=2                                                  | 19.939271 | 17 | 37  | 14 | 109.873 | 5.43  | 9000000   | 3500000   | 7900000   | 106.91 |
| Q80UJ7 | Rab3 GTPase-activating protein catalytic subunit OS=Mus musculus GN=Rab3gap1 PE=1 SV=1                        | 4.1794088 | 3  | 5   | 3  | 110.128 | 5.73  | 2700000   | 880000    | 2600000   | 15.39  |
| Q922P8 | Transmembrane protein 132A OS=Mus musculus GN=Tmem132a PE=1 SV=2                                              | 1.9646365 | 1  | 2   | 1  | 110.171 | 5.63  | 1100000   |           |           | 5.68   |
| Q9D415 | Disks large-associated protein 1 OS=Mus musculus GN=Dlgap1 PE=1 SV=3                                          | 6.4516129 | 5  | 9   | 5  | 110.305 | 7.09  | 9400000   |           | 6500000   | 23.30  |
| Q9ERK4 | Exportin-2 OS=Mus musculus GN=Cse1l PE=1 SV=1                                                                 | 4.5314109 | 3  | 4   | 3  | 110.384 | 5.77  | 1900000   |           | 970000    | 12.84  |
| O35382 | Exocyst complex component 4 OS=Mus musculus GN=Exoc4 PE=1 SV=2                                                | 6.1538462 | 4  | 9   | 4  | 110.475 | 6.49  | 2500000   | 500000    | 1300000   | 27.82  |
| Q6PH08 | ERC protein 2 OS=Mus musculus GN=Erc2 PE=1 SV=2                                                               | 15.987461 | 14 | 30  | 10 | 110.571 | 7.03  | 7900000   | 3200000   | 9400000   | 88.64  |
| Q7TQH0 | Ataxin-2-like protein OS=Mus musculus GN=Atxn2l PE=1 SV=1                                                     | 3.5271687 | 3  | 6   | 3  | 110.58  | 8.85  | 620000    |           | 450000    | 14.18  |
| A2A432 | Cullin-4B OS=Mus musculus GN=Cul4b PE=1 SV=1                                                                  | 3.1958763 | 3  | 5   | 3  | 110.63  | 8.37  | 1300000   |           | 690000    | 12.04  |
| Q8CI71 | Syndetin OS=Mus musculus GN=Vps50 PE=1 SV=2                                                                   | 5.0829876 | 4  | 8   | 4  | 111.104 | 6.07  | 2100000   | 490000    | 1400000   | 22.22  |
| Q9JKR6 | Hypoxia up-regulated protein 1 OS=Mus musculus GN=Hyou1 PE=1 SV=1                                             | 4.2042042 | 4  | 9   | 4  | 111.112 | 5.19  | 3100000   | 1300000   | 1600000   | 22.31  |
| P58281 | Dynammin-like 120 kDa protein, mitochondrial OS=Mus musculus GN=Opa1 PE=1 SV=1                                | 30.416667 | 27 | 85  | 27 | 111.27  | 7.55  | 25000000  | 13000000  | 22000000  | 256.05 |
| P80560 | Receptor-type tyrosine-phosphatase N2 OS=Mus musculus GN=Ptpn2 PE=1 SV=1                                      | 0.999001  | 1  | 1   | 1  | 111.427 | 5.95  |           | 600000    |           | 2.70   |
| Q8C7X2 | ER membrane protein complex subunit 1 OS=Mus musculus GN=Emc1 PE=1 SV=1                                       | 1.3039117 | 1  | 2   | 1  | 111.535 | 7.43  | 2000000   |           | 1500000   | 5.62   |
| Q7TPS5 | C2 domain-containing protein 5 OS=Mus musculus GN=C2cd5 PE=1 SV=2                                             | 1.1811024 | 1  | 2   | 1  | 111.593 | 5.78  | 1500000   |           | 780000    | 6.34   |
| Q6PIC6 | Sodium/potassium-transporting ATPase subunit alpha-3 OS=Mus musculus GN=Atp1a3 F=1 SV=1                       | 49.062192 | 47 | 297 | 30 | 111.62  | 5.41  | 440000000 | 110000000 | 240000000 | 988.27 |
| Q60875 | Rho guanine nucleotide exchange factor 2 OS=Mus musculus GN=Arhgef2 PE=1 SV=4                                 | 11.472081 | 10 | 14  | 10 | 111.905 | 7.25  | 4600000   |           | 2400000   | 41.76  |
| Q6PIE5 | Sodium/potassium-transporting ATPase subunit alpha-2 OS=Mus musculus GN=Atp1a2 F=1 SV=1                       | 42.843137 | 40 | 226 | 21 | 112.145 | 5.55  | 100000000 | 25000000  | 58000000  | 735.09 |
| Q9ESZ8 | General transcription factor II-I OS=Mus musculus GN=Gtf2i PE=1 SV=3                                          | 0.9018036 | 1  | 1   | 1  | 112.195 | 6.55  | 1300000   |           |           | 2.41   |
| Q8BIJ6 | Isoleucine--tRNA ligase, mitochondrial OS=Mus musculus GN=lars2 PE=1 SV=1                                     | 5.4347826 | 5  | 9   | 5  | 112.732 | 6.81  | 3000000   | 840000    | 1700000   | 23.29  |
| Q505D1 | Serine/threonine-protein phosphatase 6 regulatory ankyrin repeat subunit A OS=Mus musculus GN=Sh3p2 PE=1 SV=1 | 1.5194682 | 1  | 2   | 1  | 112.826 | 6.27  | 840000    | 600000    |           | 5.10   |
| Q8VDN2 | Sodium/potassium-transporting ATPase subunit alpha-1 OS=Mus musculus GN=Atp1a1 F=1 SV=1                       | 41.055718 | 38 | 224 | 23 | 112.91  | 5.45  | 180000000 | 49000000  | 110000000 | 742.06 |
| Q61330 | Contactin-2 OS=Mus musculus GN=Cntn2 PE=1 SV=2                                                                | 4.1346154 | 3  | 7   | 3  | 113.146 | 7.62  | 1700000   | 1500000   | 1900000   | 23.45  |
| Q07409 | Contactin-3 OS=Mus musculus GN=Cntn3 PE=1 SV=2                                                                | 4.766537  | 3  | 4   | 3  | 113.161 | 6.23  | 500000    | 500000    |           | 10.10  |
| Q921M4 | Golgin subfamily A member 2 OS=Mus musculus GN=Golga2 PE=1 SV=3                                               | 2.3023023 | 2  | 3   | 2  | 113.209 | 5     | 1600000   |           | 1500000   | 8.82   |
| P12960 | Contactin-1 OS=Mus musculus GN=Cntn1 PE=1 SV=1                                                                | 39.509804 | 31 | 118 | 31 | 113.317 | 6.16  | 41000000  | 30000000  | 38000000  | 367.79 |
| Q9JMB8 | Contactin-6 OS=Mus musculus GN=Cntn6 PE=1 SV=2                                                                | 3.4046693 | 1  | 1   | 1  | 113.69  | 6.64  | 790000    |           |           | 3.64   |
| Q61941 | NAD(P) transhydrogenase, mitochondrial OS=Mus musculus GN=Nnt PE=1 SV=2                                       | 5.4327808 | 5  | 10  | 5  | 113.765 | 7.64  | 6800000   | 2300000   | 3200000   | 27.73  |
| Q6NZN0 | RNA-binding protein 26 OS=Mus musculus GN=Rbm26 PE=1 SV=2                                                     | 1.284585  | 1  | 2   | 1  | 114.073 | 9.16  | 940000    |           | 630000    | 6.50   |
| Q7T5F1 | Desmoglein-1 beta OS=Mus musculus GN=Dsg1b PE=1 SV=1                                                          | 2.9245283 | 3  | 6   | 3  | 114.382 | 4.84  | 2100000   | 650000    | 1900000   | 16.93  |
| Q80TM6 | R3H domain-containing protein 2 OS=Mus musculus GN=R3hdm2 PE=1 SV=2                                           | 2.0114943 | 1  | 1   | 1  | 114.512 | 8.91  | 180000    |           |           | 2.86   |
| Q2PFD7 | PH and SEC7 domain-containing protein 3 OS=Mus musculus GN=Psd3 PE=1 SV=2                                     | 5.978785  | 6  | 14  | 6  | 114.651 | 6.24  | 15000000  | 2400000   | 10000000  | 38.13  |

|        |                                                                                     |           |    |     |    |         |       |          |          |          |        |
|--------|-------------------------------------------------------------------------------------|-----------|----|-----|----|---------|-------|----------|----------|----------|--------|
| O55143 | Sarcoplasmic/endoplasmic reticulum calcium ATPase 2 OS=Mus musculus GN=Atp2a2 P     | 22.796935 | 20 | 66  | 20 | 114.784 | 5.34  | 51000000 | 11000000 | 29000000 | 194.22 |
| Q9WV27 | Sodium/potassium-transporting ATPase subunit alpha-4 OS=Mus musculus GN=Atp1a4 F    | 11.046512 | 9  | 51  | 1  | 114.813 | 5.71  | 560000   |          |          | 150.80 |
| Q9DBR7 | Protein phosphatase 1 regulatory subunit 12A OS=Mus musculus GN=Ppp1r12a PE=1 SV    | 9.5238095 | 8  | 12  | 7  | 114.927 | 5.49  | 1200000  | 400000   | 1800000  | 33.14  |
| Q8VD75 | Huntingtin-interacting protein 1 OS=Mus musculus GN=Hip1 PE=1 SV=2                  | 0.9718173 | 1  | 1   | 1  | 115.13  | 5.43  | 970000   |          |          | 2.70   |
| Q8K135 | Dyslexia-associated protein KIAA0319-like protein OS=Mus musculus GN=Kiaa0319I PE=  | 1.4312977 | 1  | 1   | 1  | 115.24  | 6.16  | 1000000  |          |          | 2.51   |
| P43406 | Integrin alpha-V OS=Mus musculus GN=Itgav PE=1 SV=2                                 | 2.394636  | 2  | 5   | 2  | 115.287 | 5.63  | 2200000  | 1400000  | 1600000  | 13.23  |
| Q6WQJ1 | Sn1-specific diacylglycerol lipase alpha OS=Mus musculus GN=Dagla PE=1 SV=2         | 3.0651341 | 3  | 5   | 3  | 115.301 | 6.42  | 630000   |          | 600000   | 11.51  |
| Q8K224 | RNA cytidine acetyltransferase OS=Mus musculus GN=Nat10 PE=1 SV=1                   | 1.4648438 | 1  | 2   | 1  | 115.346 | 8.32  | 380000   |          | 210000   | 4.89   |
| Q8CF10 | E3 ubiquitin-protein ligase NEDD4-like OS=Mus musculus GN=Nedd4I PE=1 SV=2          | 2.7888446 | 3  | 6   | 2  | 115.347 | 6.15  | 1500000  | 590000   | 1200000  | 14.25  |
| Q9EQZ6 | Rap guanine nucleotide exchange factor 4 OS=Mus musculus GN=Rapgef4 PE=1 SV=1       | 7.4183976 | 7  | 12  | 7  | 115.418 | 6.92  | 3600000  | 740000   | 2400000  | 27.74  |
| Q9QVP9 | Protein-tyrosine kinase 2-beta OS=Mus musculus GN=Ptk2b PE=1 SV=2                   | 6.1446977 | 6  | 12  | 6  | 115.72  | 6.35  | 3000000  | 600000   | 2400000  | 28.36  |
| Q9Z0H8 | CAP-Gly domain-containing linker protein 2 OS=Mus musculus GN=Clip2 PE=1 SV=2       | 10.983763 | 10 | 16  | 9  | 115.84  | 6.48  | 2700000  |          | 2100000  | 45.26  |
| Q5F2E8 | Serine/threonine-protein kinase TAO1 OS=Mus musculus GN=Taok1 PE=1 SV=1             | 4.1958042 | 4  | 6   | 3  | 115.977 | 7.55  | 1700000  | 340000   | 1100000  | 15.87  |
| Q91YE6 | Importin-9 OS=Mus musculus GN=Ipo9 PE=1 SV=3                                        | 1.0566763 | 1  | 1   | 1  | 115.978 | 4.81  | 1100000  |          |          | 2.83   |
| Q5SYD0 | Unconventional myosin-1d OS=Mus musculus GN=Myo1d PE=1 SV=1                         | 1.3916501 | 1  | 1   | 1  | 116.007 | 9.41  | 690000   |          |          | 2.66   |
| Q99MR1 | PERQ amino acid-rich with GYF domain-containing protein 1 OS=Mus musculus GN=Gig    | 4.1187739 | 2  | 2   | 2  | 116.167 | 5.39  | 1300000  |          |          | 6.14   |
| Q8BUH8 | Sentrin-specific protease 7 OS=Mus musculus GN=Senp7 PE=1 SV=1                      | 1.1571842 | 1  | 1   | 1  | 116.273 | 6.52  |          |          |          | 2.85   |
| P97434 | Myosin phosphatase Rho-interacting protein OS=Mus musculus GN=Mprip PE=1 SV=2       | 5.7617188 | 3  | 4   | 3  | 116.337 | 6.21  | 940000   |          | 590000   | 11.38  |
| Q60597 | 2-oxoglutarate dehydrogenase, mitochondrial OS=Mus musculus GN=Ogdh PE=1 SV=3       | 31.085044 | 26 | 76  | 26 | 116.375 | 6.83  | 16000000 | 13000000 | 24000000 | 208.46 |
| Q64727 | Vinculin OS=Mus musculus GN=Vcl PE=1 SV=4                                           | 2.3452158 | 2  | 2   | 2  | 116.644 | 6     | 1900000  |          |          | 4.91   |
| Q80X50 | Ubiquitin-associated protein 2-like OS=Mus musculus GN=Ubp2I PE=1 SV=1              | 4.0650407 | 3  | 4   | 3  | 116.728 | 7.11  | 2100000  |          | 1700000  | 12.49  |
| Q88532 | Zinc finger RNA-binding protein OS=Mus musculus GN=Zfr PE=1 SV=2                    | 11.173184 | 9  | 13  | 9  | 116.786 | 9.04  | 2700000  |          | 1700000  | 37.03  |
| Q8CH25 | SAFB-like transcription modulator OS=Mus musculus GN=Sltm PE=1 SV=1                 | 9.3113482 | 5  | 6   | 5  | 116.85  | 7.72  | 1600000  |          | 1000000  | 20.18  |
| Q8CGY8 | UDP-N-acetylglucosamine--peptide N-acetylglucosaminyltransferase 110 kDa subunit OS | 3.1548757 | 3  | 6   | 3  | 116.877 | 6.7   | 1300000  |          | 1700000  | 14.86  |
| Q61136 | Serine/threonine-protein kinase PRP4 homolog OS=Mus musculus GN=Prpf4b PE=1 SV=     | 1.1916584 | 1  | 2   | 1  | 116.904 | 10.23 | 2600000  |          | 2200000  | 6.93   |
| P19246 | Neurofilament heavy polypeptide OS=Mus musculus GN=Nefh PE=1 SV=3                   | 19.541284 | 19 | 44  | 16 | 116.924 | 5.81  | 8200000  | 1300000  | 10000000 | 124.98 |
| P33175 | Kinesin heavy chain isoform 5A OS=Mus musculus GN=Kif5a PE=1 SV=3                   | 7.0107108 | 6  | 10  | 1  | 116.946 | 5.94  |          |          |          | 34.27  |
| Q8C5W0 | Calmin OS=Mus musculus GN=Climn PE=1 SV=2                                           | 1.0456274 | 1  | 1   | 1  | 117.155 | 5.03  | 1000000  |          |          | 2.58   |
| Q8C129 | Leucyl-cystinyl aminopeptidase OS=Mus musculus GN=Lnpep PE=1 SV=1                   | 1.8536585 | 1  | 1   | 1  | 117.229 | 5.96  |          |          | 420000   | 0.00   |
| Q80YA9 | Connector enhancer of kinase suppressor of ras 2 OS=Mus musculus GN=Cnksr2 PE=1     | 6.6860465 | 5  | 11  | 5  | 117.323 | 6.79  | 4100000  | 880000   | 2600000  | 32.73  |
| P27546 | Microtubule-associated protein 4 OS=Mus musculus GN=Map4 PE=1 SV=3                  | 12.711111 | 10 | 18  | 10 | 117.357 | 4.98  | 2500000  | 540000   | 1500000  | 48.54  |
| Q569Z5 | Probable ATP-dependent RNA helicase DDX46 OS=Mus musculus GN=Ddx46 PE=1 SV=         | 5.3294574 | 4  | 7   | 4  | 117.376 | 9.26  | 2200000  |          | 880000   | 20.92  |
| P59759 | MKL/myocardin-like protein 2 OS=Mus musculus GN=Mkl2 PE=1 SV=1                      | 1.0185185 | 1  | 1   | 1  | 117.474 | 6.16  | 1100000  |          |          | 2.18   |
| Q9CZU3 | Superkiller viralicidic activity 2-like 2 OS=Mus musculus GN=Skiv2I2 PE=1 SV=1      | 1.3461538 | 1  | 1   | 1  | 117.561 | 6.4   |          |          |          | 2.80   |
| Q02053 | Ubiquitin-like modifier-activating enzyme 1 OS=Mus musculus GN=Uba1 PE=1 SV=1       | 15.500945 | 13 | 34  | 13 | 117.734 | 5.66  | 15000000 | 4400000  | 9600000  | 114.78 |
| Q8C7R4 | Ubiquitin-like modifier-activating enzyme 6 OS=Mus musculus GN=Uba6 PE=1 SV=1       | 1.2345679 | 1  | 1   | 1  | 117.891 | 6.11  | 310000   |          |          | 3.19   |
| Q8CH09 | SURP and G-patch domain-containing protein 2 OS=Mus musculus GN=Sugp2 PE=1 SV=      | 3.0927835 | 2  | 2   | 2  | 118.029 | 8.31  | 1400000  |          |          | 7.49   |
| Q3UH68 | LIM and calponin homology domains-containing protein 1 OS=Mus musculus GN=Limch1    | 2.8382214 | 2  | 2   | 2  | 118.123 | 5.48  | 360000   |          | 1500000  | 6.76   |
| Q6NV83 | U2 snRNP-associated SURP motif-containing protein OS=Mus musculus GN=U2surp PE=     | 3.4985423 | 2  | 3   | 2  | 118.188 | 8.47  | 2100000  |          | 2900000  | 10.33  |
| Q80U40 | RIMS-binding protein 2 OS=Mus musculus GN=Rimbp2 PE=1 SV=3                          | 2.9850746 | 2  | 3   | 2  | 118.269 | 5.35  | 2500000  |          | 1400000  | 9.09   |
| O70228 | Probable phospholipid-transporting ATPase IIA OS=Mus musculus GN=Atp9a PE=1 SV=3    | 3.6294174 | 3  | 3   | 3  | 118.532 | 7.69  | 2000000  |          |          | 7.87   |
| F8VPU2 | FERM, RhoGEF and pleckstrin domain-containing protein 1 OS=Mus musculus GN=Farp     | 9.351145  | 7  | 11  | 7  | 118.801 | 7.88  | 4300000  | 1400000  | 3300000  | 33.35  |
| Q8BJ42 | Disks large-associated protein 2 OS=Mus musculus GN=Dlgap2 PE=1 SV=2                | 8.687441  | 6  | 14  | 5  | 118.998 | 6.81  | 6100000  |          | 4400000  | 46.45  |
| Q9JME5 | AP-3 complex subunit beta-2 OS=Mus musculus GN=Ap3b2 PE=1 SV=2                      | 17.92976  | 15 | 31  | 15 | 119.118 | 5.63  | 12000000 | 1600000  | 5700000  | 90.02  |
| Q7TMC8 | L-fucose kinase OS=Mus musculus GN=Fuk PE=1 SV=1                                    | 1.3761468 | 1  | 1   | 1  | 119.191 | 6.6   | 660000   |          |          | 3.13   |
| Q8R4U7 | Leucine zipper protein 1 OS=Mus musculus GN=Luzp1 PE=1 SV=2                         | 1.3108614 | 1  | 2   | 1  | 119.239 | 7.99  |          |          |          | 6.74   |
| Q9JKY5 | Huntingtin-interacting protein 1-related protein OS=Mus musculus GN=Hip1r PE=1 SV=2 | 2.7153558 | 2  | 3   | 2  | 119.353 | 6.52  | 2000000  |          | 1800000  | 10.81  |
| P13595 | Neural cell adhesion molecule 1 OS=Mus musculus GN=Ncam1 PE=1 SV=3                  | 29.237668 | 24 | 101 | 24 | 119.353 | 4.83  | 86000000 | 50000000 | 79000000 | 316.98 |



|        |                                                                                                                                  |           |    |    |    |         |      |          |          |          |        |
|--------|----------------------------------------------------------------------------------------------------------------------------------|-----------|----|----|----|---------|------|----------|----------|----------|--------|
| Q9EPL8 | Importin-7 OS=Mus musculus GN=Ipo7 PE=1 SV=2                                                                                     | 2.2157996 | 2  | 3  | 2  | 119.41  | 4.82 | 1400000  |          | 1200000  | 8.87   |
| Q91V92 | ATP-citrate synthase OS=Mus musculus GN=Acly PE=1 SV=1                                                                           | 6.59945   | 6  | 10 | 6  | 119.651 | 7.44 | 4600000  | 1700000  | 2400000  | 27.28  |
| Q920B9 | FACT complex subunit SPT16 OS=Mus musculus GN=Supt16h PE=1 SV=2                                                                  | 5.3486151 | 5  | 6  | 5  | 119.749 | 5.66 | 2600000  |          | 1600000  | 16.17  |
| Q3V0C5 | Ubiquitin carboxyl-terminal hydrolase 48 OS=Mus musculus GN=Usp48 PE=1 SV=2                                                      | 1.6159696 | 1  | 1  | 1  | 120.554 | 6.25 | 230000   |          |          | 2.17   |
| O55201 | Transcription elongation factor SPT5 OS=Mus musculus GN=Supt5h PE=1 SV=1                                                         | 4.3438078 | 2  | 3  | 2  | 120.589 | 5.05 | 1100000  |          | 690000   | 9.84   |
| A2AWA9 | Rab GTPase-activating protein 1 OS=Mus musculus GN=Rabgap1 PE=1 SV=1                                                             | 1.1278195 | 1  | 3  | 1  | 120.722 | 5.25 | 1900000  | 240000   | 1200000  | 9.28   |
| Q91Z67 | SLIT-ROBO Rho GTPase-activating protein 2 OS=Mus musculus GN=Srgap2 PE=1 SV=2                                                    | 4.6685341 | 3  | 4  | 3  | 120.723 | 6.64 | 1100000  |          | 1100000  | 12.39  |
| Q9Z1R2 | Large proline-rich protein BAG6 OS=Mus musculus GN=Bag6 PE=1 SV=1                                                                | 2.1663778 | 2  | 3  | 2  | 120.962 | 5.71 | 370000   |          | 540000   | 6.29   |
| Q91Z69 | SLIT-ROBO Rho GTPase-activating protein 1 OS=Mus musculus GN=Srgap1 PE=1 SV=2                                                    | 1.0357815 | 1  | 1  | 1  | 121.354 | 6.74 | 2100000  |          |          | 3.26   |
| O88343 | Electrogenic sodium bicarbonate cotransporter 1 OS=Mus musculus GN=Slc4a4 PE=1 SV=1                                              | 5.3753475 | 5  | 14 | 5  | 121.406 | 6.84 | 8300000  | 2400000  | 5500000  | 42.32  |
| Q6R0H7 | Guanine nucleotide-binding protein G(s) subunit alpha isoforms XLas OS=Mus musculus                                              | 9.4439541 | 9  | 26 | 8  | 121.429 | 4.81 | 18000000 | 7400000  | 14000000 | 66.79  |
| Q91ZW3 | SWI/SNF-related matrix-associated actin-dependent regulator of chromatin subfamily A member 1 OS=Mus musculus GN=Smad4 PE=1 SV=1 | 4.2816365 | 3  | 5  | 3  | 121.55  | 8.15 | 2600000  | 280000   | 2200000  | 17.91  |
| Q6A0A9 | Constitutive activator of PPAR-gamma-like protein 1 OS=Mus musculus GN=FAM120A                                                   | 6.205036  | 5  | 8  | 5  | 121.569 | 8.92 | 3700000  |          | 1900000  | 25.45  |
| Q8BT19 | Phosphatidylinositol 4,5-bisphosphate 3-kinase catalytic subunit beta isoform OS=Mus musculus                                    | 1.4097744 | 1  | 1  | 1  | 121.633 | 7.09 | 430000   |          |          | 2.20   |
| Q9JL26 | Formin-like protein 1 OS=Mus musculus GN=Fmnl1 PE=1 SV=1                                                                         | 1.2797075 | 1  | 1  | 1  | 121.983 | 5.82 | 870000   |          |          | 2.78   |
| Q9Z1L5 | Voltage-dependent calcium channel subunit alpha-2/delta-3 OS=Mus musculus GN=Cacr1                                               | 5.4995417 | 4  | 4  | 4  | 122.7   | 5.73 | 2200000  |          |          | 14.26  |
| Q6P5F9 | Exportin-1 OS=Mus musculus GN=Xpo1 PE=1 SV=1                                                                                     | 2.1475257 | 2  | 4  | 2  | 123.013 | 6.07 | 2800000  |          | 1900000  | 12.97  |
| B2RUP2 | Protein unc-13 homolog D OS=Mus musculus GN=Unc13d PE=1 SV=2                                                                     | 1.4746544 | 1  | 1  | 1  | 123.042 | 6.62 |          |          | 420000   | 3.01   |
| Q8BPQ7 | Small G protein signaling modulator 1 OS=Mus musculus GN=Sgsm1 PE=1 SV=2                                                         | 1.0064044 | 1  | 1  | 1  | 123.118 | 5.66 | 630000   |          |          | 2.31   |
| Q80TL1 | Adenylate cyclase type 2 OS=Mus musculus GN=Adcy2 PE=1 SV=2                                                                      | 1.559633  | 1  | 1  | 1  | 123.19  | 8.31 | 570000   |          |          | 4.34   |
| O88444 | Adenylate cyclase type 1 OS=Mus musculus GN=Adcy1 PE=1 SV=2                                                                      | 1.431127  | 1  | 2  | 1  | 123.293 | 8.47 | 1000000  |          | 640000   | 4.42   |
| P34152 | Focal adhesion kinase 1 OS=Mus musculus GN=Ptk2 PE=1 SV=3                                                                        | 1.6513761 | 2  | 3  | 2  | 123.458 | 6.68 | 2400000  |          | 1700000  | 6.89   |
| Q8BKC5 | Importin-5 OS=Mus musculus GN=Ipo5 PE=1 SV=3                                                                                     | 2.461258  | 2  | 2  | 2  | 123.511 | 4.93 | 930000   |          | 2200000  | 7.32   |
| Q8CGF7 | Transcription elongation regulator 1 OS=Mus musculus GN=Tcerg1 PE=1 SV=2                                                         | 3.9090909 | 3  | 3  | 3  | 123.71  | 8.65 | 1100000  |          |          | 7.42   |
| Q9EPK7 | Exportin-7 OS=Mus musculus GN=Xpo7 PE=1 SV=3                                                                                     | 2.299908  | 2  | 2  | 2  | 123.731 | 6.38 | 2400000  | 330000   |          | 5.00   |
| Q9EPU0 | Regulator of nonsense transcripts 1 OS=Mus musculus GN=Upf1 PE=1 SV=2                                                            | 6.4946619 | 6  | 9  | 6  | 123.889 | 6.61 | 3400000  |          | 1900000  | 24.03  |
| Q812A2 | SLIT-ROBO Rho GTPase-activating protein 3 OS=Mus musculus GN=Srgap3 PE=1 SV=1                                                    | 11.101001 | 9  | 15 | 9  | 124.341 | 6.67 | 5300000  | 640000   | 2600000  | 44.67  |
| Q3UHD9 | Arf-GAP with GTPase, ANK repeat and PH domain-containing protein 2 OS=Mus musculus                                               | 8.3473862 | 8  | 15 | 8  | 124.434 | 9.89 | 4000000  | 790000   | 2300000  | 43.89  |
| O08532 | Voltage-dependent calcium channel subunit alpha-2/delta-1 OS=Mus musculus GN=Cacr1                                               | 17.860381 | 15 | 60 | 15 | 124.551 | 5.3  | 13000000 | 8600000  | 12000000 | 186.77 |
| P59281 | Rho GTPase-activating protein 39 OS=Mus musculus GN=Arhgap39 PE=1 SV=2                                                           | 1.0840108 | 1  | 1  | 1  | 125.127 | 7.97 | 830000   |          |          | 3.05   |
| Q8K394 | Inactive phospholipase C-like protein 2 OS=Mus musculus GN=Plcl2 PE=1 SV=2                                                       | 1.2411348 | 1  | 1  | 1  | 125.692 | 6.92 | 1700000  |          |          | 3.14   |
| Q9Z2V5 | Histone deacetylase 6 OS=Mus musculus GN=Hdac6 PE=1 SV=3                                                                         | 1.2184508 | 1  | 3  | 1  | 125.706 | 5.78 | 1400000  | 300000   | 970000   | 8.99   |
| Q5DTL9 | Sodium-driven chloride bicarbonate exchanger OS=Mus musculus GN=Slc4a10 PE=1 SV=1                                                | 14.400716 | 13 | 34 | 13 | 125.736 | 6.51 | 16000000 | 3000000  | 6900000  | 100.20 |
| Q91V14 | Solute carrier family 12 member 5 OS=Mus musculus GN=Slc12a5 PE=1 SV=2                                                           | 19.683656 | 16 | 44 | 16 | 126.189 | 6.74 | 52000000 | 13000000 | 33000000 | 121.63 |
| Q99P72 | Reticulon-4 OS=Mus musculus GN=Rtn4 PE=1 SV=2                                                                                    | 19.104991 | 15 | 42 | 15 | 126.535 | 4.54 | 19000000 | 5000000  | 15000000 | 128.67 |
| Q80U78 | Pumilio homolog 1 OS=Mus musculus GN=Pum1 PE=1 SV=2                                                                              | 0.9251472 | 1  | 1  | 1  | 126.541 | 6.86 | 1900000  |          |          | 2.20   |
| Q3U1J4 | DNA damage-binding protein 1 OS=Mus musculus GN=Ddb1 PE=1 SV=2                                                                   | 0.9649123 | 1  | 1  | 1  | 126.772 | 5.26 | 1800000  |          |          | 2.97   |
| Q9QWY8 | Arf-GAP with SH3 domain, ANK repeat and PH domain-containing protein 1 OS=Mus musculus                                           | 4.6207498 | 4  | 6  | 4  | 127.342 | 7.64 | 2600000  | 390000   | 1700000  | 16.90  |
| Q8K400 | Syntaxin-binding protein 5 OS=Mus musculus GN=Stxbp5 PE=1 SV=3                                                                   | 8.9409722 | 6  | 9  | 5  | 127.57  | 7.21 | 2700000  | 460000   | 860000   | 24.40  |
| Q99M11 | ELKS/Rab6-interacting/CAST family member 1 OS=Mus musculus GN=Erc1 PE=1 SV=1                                                     | 4.6428571 | 5  | 9  | 1  | 128.252 | 5.87 | 500000   |          |          | 24.93  |
| Q80U19 | Disheveled-associated activator of morphogenesis 2 OS=Mus musculus GN=Daam2 PE=1 SV=1                                            | 1.5246637 | 2  | 2  | 2  | 128.289 | 6.92 | 590000   |          | 320000   | 3.98   |
| B2RXC1 | Trafficking protein particle complex subunit 11 OS=Mus musculus GN=Trappc11 PE=1 SV=1                                            | 1.059135  | 1  | 1  | 1  | 128.314 | 7.58 | 1200000  |          |          | 1.99   |
| Q6A4J8 | Ubiquitin carboxyl-terminal hydrolase 7 OS=Mus musculus GN=Usp7 PE=1 SV=1                                                        | 3.8077969 | 4  | 7  | 4  | 128.393 | 5.5  | 1500000  |          | 2100000  | 17.43  |
| Q8R0G9 | Nuclear pore complex protein Nup133 OS=Mus musculus GN=Nup133 PE=1 SV=2                                                          | 1.2987013 | 1  | 1  | 1  | 128.539 | 5.2  | 620000   |          |          | 2.70   |
| Q9EP53 | Hamartin OS=Mus musculus GN=Tsc1 PE=1 SV=1                                                                                       | 1.1197244 | 1  | 1  | 1  | 128.666 | 6.37 | 450000   |          |          | 2.96   |
| P28660 | Nck-associated protein 1 OS=Mus musculus GN=Nckap1 PE=1 SV=2                                                                     | 15.514184 | 17 | 33 | 17 | 128.7   | 6.62 | 12000000 | 2700000  | 8200000  | 85.11  |
| Q3TES0 | IQ motif and SEC7 domain-containing protein 3 OS=Mus musculus GN=Iqsec3 PE=1 SV=1                                                | 5.1882845 | 4  | 5  | 3  | 129.038 | 6.19 | 1400000  |          | 960000   | 13.72  |
| Q01149 | Collagen alpha-2(I) chain OS=Mus musculus GN=Col1a2 PE=1 SV=2                                                                    | 6.4868805 | 6  | 19 | 6  | 129.478 | 9.19 | 38000000 | 28000000 | 16000000 | 57.40  |

|        |                                                                                      |           |    |     |    |         |      |          |          |          |        |
|--------|--------------------------------------------------------------------------------------|-----------|----|-----|----|---------|------|----------|----------|----------|--------|
| Q05920 | Pyruvate carboxylase, mitochondrial OS=Mus musculus GN=Pc PE=1 SV=1                  | 17.911715 | 17 | 31  | 17 | 129.602 | 6.71 | 8200000  | 4100000  | 7800000  | 89.26  |
| Q80VP0 | Tectonin beta-propeller repeat-containing protein 1 OS=Mus musculus GN=Tecpr1 PE=1   | 6.6895369 | 5  | 12  | 5  | 130.184 | 6.48 | 1500000  | 1100000  | 2900000  | 40.25  |
| Q6PHS9 | Voltage-dependent calcium channel subunit alpha-2/delta-2 OS=Mus musculus GN=Cacr    | 5.1993068 | 5  | 11  | 5  | 130.303 | 5.66 | 1500000  | 900000   | 1100000  | 30.70  |
| P55012 | Solute carrier family 12 member 2 OS=Mus musculus GN=Slc12a2 PE=1 SV=2               | 0.9958506 | 1  | 1   | 1  | 130.95  | 7.33 | 2300000  |          |          | 2.45   |
| Q9Z0U1 | Tight junction protein ZO-2 OS=Mus musculus GN=Tjp2 PE=1 SV=2                        | 1.9708655 | 2  | 3   | 2  | 131.2   | 6.79 | 480000   |          | 620000   | 7.19   |
| P70704 | Phospholipid-transporting ATPase IA OS=Mus musculus GN=Atp8a1 PE=1 SV=2              | 12.972509 | 13 | 27  | 13 | 131.33  | 6.84 | 15000000 | 3100000  | 6400000  | 81.31  |
| Q7TQG1 | Pleckstrin homology domain-containing family A member 6 OS=Mus musculus GN=Plekh     | 2.4722933 | 2  | 3   | 2  | 131.346 | 8.97 | 1500000  |          | 810000   | 8.10   |
| Q68FH0 | Plakophilin-4 OS=Mus musculus GN=Pkp4 PE=1 SV=1                                      | 3.697479  | 4  | 5   | 2  | 131.47  | 8.94 | 300000   |          | 600000   | 10.99  |
| Q3UHC7 | Disabled homolog 2-interacting protein OS=Mus musculus GN=Dab2ip PE=1 SV=1           | 1.8502944 | 2  | 3   | 1  | 131.644 | 8.72 | 2700000  |          | 1900000  | 6.99   |
| Q5DQR4 | Syntaxin-binding protein 5-like OS=Mus musculus GN=Stxbp5l PE=1 SV=1                 | 3.8818565 | 2  | 3   | 1  | 131.76  | 6.86 |          |          |          | 7.45   |
| Q3UVX5 | Metabotropic glutamate receptor 5 OS=Mus musculus GN=Grm5 PE=1 SV=2                  | 6.6500416 | 5  | 9   | 5  | 131.78  | 7.84 | 2600000  | 560000   | 2100000  | 27.61  |
| Q3TVAJ | Coiled-coil domain-containing protein 136 OS=Mus musculus GN=Ccdc136 PE=1 SV=2       | 8.5387324 | 6  | 11  | 6  | 131.847 | 4.84 | 1600000  | 590000   | 1400000  | 34.05  |
| Q3UTJ2 | Sorbin and SH3 domain-containing protein 2 OS=Mus musculus GN=Sorbs2 PE=1 SV=2       | 6.6101695 | 6  | 8   | 5  | 132.266 | 8.53 | 1400000  |          | 400000   | 20.34  |
| Q68FE6 | Protein FAM65A OS=Mus musculus GN=Fam65a PE=1 SV=2                                   | 1.2264922 | 1  | 1   | 1  | 132.27  | 5.88 | 370000   |          |          | 3.89   |
| Q9EPE9 | Manganese-transporting ATPase 13A1 OS=Mus musculus GN=Atp13a1 PE=1 SV=2              | 0.75      | 1  | 1   | 1  | 132.303 | 8.03 | 910000   |          |          | 2.19   |
| Q9R0K7 | Plasma membrane calcium-transporting ATPase 2 OS=Mus musculus GN=Atp2b2 PE=1         | 31.469115 | 32 | 124 | 22 | 132.503 | 5.96 | 76000000 | 15000000 | 53000000 | 414.94 |
| Q6PDG5 | SWI/SNF complex subunit SMARCC2 OS=Mus musculus GN=Smrcc2 PE=1 SV=2                  | 13.849959 | 13 | 17  | 13 | 132.522 | 5.59 | 3800000  |          | 1500000  | 51.56  |
| Q6Q477 | Plasma membrane calcium-transporting ATPase 4 OS=Mus musculus GN=Atp2b4 PE=1         | 21.493776 | 21 | 87  | 11 | 132.984 | 6.13 | 38000000 | 11000000 | 21000000 | 311.74 |
| P97772 | Metabotropic glutamate receptor 1 OS=Mus musculus GN=Grm1 PE=1 SV=2                  | 1.2510425 | 1  | 2   | 1  | 133.127 | 6.86 | 1300000  |          |          | 5.35   |
| Q6GQT9 | Nodal modulator 1 OS=Mus musculus GN=Nomo1 PE=1 SV=1                                 | 7.660626  | 7  | 14  | 7  | 133.336 | 6.09 | 3600000  | 2100000  | 2500000  | 41.85  |
| P60469 | Liprin-alpha-3 OS=Mus musculus GN=Ppfia3 PE=1 SV=2                                   | 14.740369 | 13 | 28  | 13 | 133.344 | 5.64 | 4900000  | 890000   | 4400000  | 80.75  |
| Q3UPL0 | Protein transport protein Sec31A OS=Mus musculus GN=Sec31a PE=1 SV=2                 | 0.7317073 | 1  | 2   | 1  | 133.486 | 6.76 | 1800000  |          | 1100000  | 4.43   |
| Q61543 | Golgi apparatus protein 1 OS=Mus musculus GN=Glg1 PE=1 SV=1                          | 12.425532 | 12 | 26  | 12 | 133.646 | 6.84 | 3000000  | 2200000  | 2200000  | 71.73  |
| Q8BMJ2 | Leucine--tRNA ligase, cytoplasmic OS=Mus musculus GN=Lars PE=1 SV=2                  | 5.7724958 | 5  | 7   | 5  | 134.106 | 7.05 | 1500000  |          | 920000   | 19.89  |
| Q08460 | Calcium-activated potassium channel subunit alpha-1 OS=Mus musculus GN=Kcnma1 PE=1   | 2.4813896 | 2  | 3   | 2  | 134.31  | 7.15 | 2100000  |          | 1400000  | 9.41   |
| Q8C419 | Probable G-protein coupled receptor 158 OS=Mus musculus GN=Gpr158 PE=1 SV=2          | 14.083333 | 9  | 18  | 9  | 134.341 | 8.09 | 3700000  | 450000   | 2800000  | 54.63  |
| Q8CDG3 | Deubiquitinating protein VCIP135 OS=Mus musculus GN=Vcpi1 PE=1 SV=1                  | 3.6885246 | 3  | 4   | 3  | 134.418 | 7.17 | 1400000  |          | 140000   | 10.52  |
| Q148V7 | LisH domain and HEAT repeat-containing protein KIAA1468 OS=Mus musculus GN=Kiaa      | 1.0690789 | 1  | 2   | 1  | 134.502 | 5.34 | 620000   |          | 1100000  | 6.13   |
| G5E829 | Plasma membrane calcium-transporting ATPase 1 OS=Mus musculus GN=Atp2b1 PE=1         | 24.672131 | 26 | 105 | 14 | 134.662 | 5.91 | 67000000 | 15000000 | 41000000 | 352.81 |
| Q9QWI6 | SRC kinase signaling inhibitor 1 OS=Mus musculus GN=Srcin1 PE=1 SV=2                 | 21.44     | 19 | 41  | 19 | 134.776 | 9.32 | 14000000 | 2300000  | 9500000  | 125.44 |
| O35954 | Membrane-associated phosphatidylinositol transfer protein 1 OS=Mus musculus GN=Pitp  | 3.0571199 | 2  | 3   | 2  | 134.855 | 6.06 | 860000   |          | 930000   | 9.74   |
| O35927 | Catenin delta-2 OS=Mus musculus GN=Ctnnd2 PE=1 SV=1                                  | 16.359262 | 15 | 29  | 13 | 134.916 | 7.65 | 6300000  | 770000   | 8000000  | 80.13  |
| P70232 | Neural cell adhesion molecule L1-like protein OS=Mus musculus GN=Chl1 PE=1 SV=2      | 5.3763441 | 4  | 7   | 4  | 134.99  | 5.57 | 1200000  | 1100000  | 1200000  | 21.26  |
| O54774 | AP-3 complex subunit delta-1 OS=Mus musculus GN=Ap3d1 PE=1 SV=1                      | 7.9232694 | 8  | 17  | 8  | 134.996 | 7.37 | 5800000  | 780000   | 5200000  | 56.17  |
| Q80VC9 | Calmodulin-regulated spectrin-associated protein 3 OS=Mus musculus GN=Camsap3 PE=1   | 1.1182109 | 1  | 1   | 1  | 135.091 | 8.43 | 520000   |          |          | 2.78   |
| P16283 | Anion exchange protein 3 OS=Mus musculus GN=Slc4a3 PE=1 SV=2                         | 2.607987  | 2  | 5   | 2  | 135.288 | 6.51 | 890000   |          | 590000   | 13.20  |
| Q921M3 | Splicing factor 3B subunit 3 OS=Mus musculus GN=Sf3b3 PE=1 SV=1                      | 3.2046015 | 3  | 5   | 3  | 135.465 | 5.26 | 4600000  |          | 2600000  | 13.05  |
| P70392 | Ras-specific guanine nucleotide-releasing factor 2 OS=Mus musculus GN=Rasgrf2 PE=1   | 2.0185029 | 2  | 4   | 2  | 135.581 | 7.85 | 1100000  |          | 770000   | 11.26  |
| Q6ZQ38 | Cullin-associated NEDD8-dissociated protein 1 OS=Mus musculus GN=Cand1 PE=1 SV=1     | 9.5121951 | 11 | 20  | 11 | 136.245 | 5.78 | 11000000 | 1900000  | 5500000  | 55.98  |
| O70305 | Ataxin-2 OS=Mus musculus GN=Atxn2 PE=1 SV=1                                          | 1.1673152 | 1  | 1   | 1  | 136.4   | 9.55 |          |          | 750000   | 2.67   |
| P10493 | Nidogen-1 OS=Mus musculus GN=Nid1 PE=1 SV=2                                          | 1.0441767 | 1  | 2   | 1  | 136.45  | 5.44 |          | 660000   | 740000   | 5.47   |
| Q64455 | Receptor-type tyrosine-protein phosphatase eta OS=Mus musculus GN=Ptprij PE=1 SV=2   | 1.3731826 | 1  | 1   | 1  | 136.683 | 5.57 |          |          | 1100000  | 2.37   |
| P55066 | Neurocan core protein OS=Mus musculus GN=Ncan PE=1 SV=1                              | 13.958991 | 13 | 31  | 13 | 137.114 | 5.72 | 11000000 | 7700000  | 11000000 | 84.00  |
| Q05D44 | Eukaryotic translation initiation factor 5B OS=Mus musculus GN=Elf5b PE=1 SV=2       | 2.3848684 | 2  | 3   | 2  | 137.532 | 5.59 | 1200000  |          | 1300000  | 10.73  |
| Q810U3 | Neurofascin OS=Mus musculus GN=Nfasc PE=1 SV=1                                       | 17.258065 | 17 | 56  | 17 | 137.889 | 6.19 | 35000000 | 10000000 | 22000000 | 169.26 |
| P11087 | Collagen alpha-1(I) chain OS=Mus musculus GN=Col1a1 PE=1 SV=4                        | 7.7770131 | 8  | 25  | 8  | 137.948 | 5.85 | 62000000 | 57000000 | 39000000 | 84.14  |
| Q9Z1B3 | 1-phosphatidylinositol 4,5-bisphosphate phosphodiesterase beta-1 OS=Mus musculus GN= | 23.519737 | 23 | 62  | 23 | 138.309 | 6.13 | 16000000 | 5600000  | 14000000 | 194.66 |
| Q8CIE6 | Coatomer subunit alpha OS=Mus musculus GN=Copa PE=1 SV=2                             | 5.9640523 | 6  | 6   | 6  | 138.344 | 7.65 | 3900000  |          |          | 17.13  |

|        |                                                                                       |   |           |    |     |    |         |      |          |          |          |        |
|--------|---------------------------------------------------------------------------------------|---|-----------|----|-----|----|---------|------|----------|----------|----------|--------|
| P04258 | SWISS-PROT:P04258 (Bos taurus) Similar to Collagen alpha 1(III) chain                 | x | 2.7967258 | 3  | 3   | 3  | 138.354 | 6.43 |          | 4800000  |          | 9.75   |
| Q810U4 | Neuronal cell adhesion molecule OS=Mus musculus GN=Nrcam PE=1 SV=2                    |   | 17.595541 | 19 | 49  | 19 | 138.435 | 5.91 | 9300000  | 8700000  | 12000000 | 149.56 |
| Q8BIZ1 | Ankyrin repeat and sterile alpha motif domain-containing protein 1B OS=Mus musculus G |   | 2.7799841 | 3  | 7   | 3  | 138.961 | 6.29 | 11000000 | 3000000  | 7800000  | 19.76  |
| Q69ZW3 | EH domain-binding protein 1 OS=Mus musculus GN=Ehbp1 PE=1 SV=3                        |   | 4.6303818 | 3  | 4   | 3  | 139.019 | 5.38 | 570000   |          | 720000   | 12.24  |
| Q6ZQ29 | Serine/threonine-protein kinase TAO2 OS=Mus musculus GN=Taok2 PE=1 SV=3               |   | 2.0967742 | 3  | 5   | 2  | 139.211 | 7.06 | 1100000  |          | 810000   | 10.94  |
| Q5SV85 | Synergina gamma OS=Mus musculus GN=Synrg PE=1 SV=1                                    |   | 1.914242  | 2  | 2   | 2  | 139.528 | 5.03 |          | 1000000  | 360000   | 6.00   |
| Q64514 | Tripeptidyl-peptidase 2 OS=Mus musculus GN=Thpp2 PE=1 SV=3                            |   | 9.1917591 | 8  | 17  | 8  | 139.791 | 6.58 | 4500000  | 1900000  | 4700000  | 55.86  |
| Q9Z1Q9 | Valine--tRNA ligase OS=Mus musculus GN=Vars PE=1 SV=1                                 |   | 8.3135392 | 8  | 16  | 8  | 140.127 | 7.77 | 7900000  | 910000   | 4300000  | 48.75  |
| P97820 | Mitogen-activated protein kinase kinase kinase 4 OS=Mus musculus GN=Map4k4            |   | 3.163017  | 3  | 4   | 1  | 140.515 | 7.47 | 210000   |          |          | 13.39  |
| Q8BRT1 | CLIP-associating protein 2 OS=Mus musculus GN=Clasp2 PE=1 SV=1                        |   | 8.1648523 | 7  | 13  | 7  | 140.652 | 8.63 | 5700000  | 1000000  | 3600000  | 44.40  |
| Q6ZPJ3 | (E3-independent) E2 ubiquitin-conjugating enzyme UBE2O OS=Mus musculus GN=Ube2        |   | 2.3291925 | 2  | 2   | 2  | 140.746 | 5.06 | 1900000  |          |          | 5.90   |
| Q9WVQ1 | Membrane-associated guanylate kinase, WW and PDZ domain-containing protein 2 OS=      |   | 2.745098  | 3  | 4   | 3  | 140.831 | 6.19 | 870000   |          | 1400000  | 9.10   |
| Q6ZPZ3 | Zinc finger CCCH domain-containing protein 4 OS=Mus musculus GN=Zc3h4 PE=1 SV=2       |   | 3.7576687 | 3  | 6   | 3  | 140.88  | 6.27 | 730000   |          | 390000   | 19.19  |
| P11627 | Neural cell adhesion molecule L1 OS=Mus musculus GN=L1cam PE=1 SV=1                   |   | 11.746032 | 11 | 26  | 11 | 140.881 | 5.97 | 7300000  | 8200000  | 6700000  | 71.80  |
| Q3V3V9 | Capping protein, Arp2/3 and myosin-I linker protein 2 OS=Mus musculus GN=Carmil2 PE=  |   | 1.3888889 | 1  | 2   | 1  | 141.284 | 7.18 | 320000   |          | 300000   | 5.21   |
| O54988 | STE20-like serine/threonine-protein kinase OS=Mus musculus GN=Slk PE=1 SV=2           |   | 10.624493 | 8  | 13  | 8  | 141.37  | 5.14 | 1400000  | 760000   | 1900000  | 35.90  |
| Q9CW03 | Structural maintenance of chromosomes protein 3 OS=Mus musculus GN=Smc3 PE=1 SV=      |   | 2.7115859 | 2  | 3   | 2  | 141.468 | 7.18 | 630000   |          | 180000   | 11.71  |
| O08788 | Dynactin subunit 1 OS=Mus musculus GN=Dctn1 PE=1 SV=3                                 |   | 17.408275 | 18 | 45  | 18 | 141.588 | 5.9  | 10000000 | 2100000  | 7600000  | 139.67 |
| Q8VDJ3 | Vigilin OS=Mus musculus GN=Hdlbp PE=1 SV=1                                            |   | 5.9936909 | 6  | 14  | 6  | 141.655 | 6.87 | 3300000  | 470000   | 1600000  | 38.00  |
| Q6PAJ1 | Breakpoint cluster region protein OS=Mus musculus GN=Bcr PE=1 SV=3                    |   | 1.5748031 | 1  | 1   | 1  | 142.982 | 6.92 | 950000   |          |          | 3.17   |
| Q62417 | Sorbin and SH3 domain-containing protein 1 OS=Mus musculus GN=Sorbs1 PE=1 SV=2        |   | 5.1937984 | 5  | 8   | 4  | 142.982 | 8.25 | 1900000  |          | 890000   | 19.62  |
| Q9CU62 | Structural maintenance of chromosomes protein 1A OS=Mus musculus GN=Smc1a PE=1        |   | 0.973236  | 1  | 1   | 1  | 143.146 | 7.64 | 550000   |          |          | 2.19   |
| Q8BSS9 | Liprin-alpha-2 OS=Mus musculus GN=Ppfia2 PE=1 SV=2                                    |   | 6.2848051 | 6  | 10  | 6  | 143.146 | 6.11 | 1500000  | 280000   | 1800000  | 27.04  |
| Q99KY4 | Cyclin-G-associated kinase OS=Mus musculus GN=Gak PE=1 SV=2                           |   | 1.9923372 | 2  | 4   | 2  | 143.55  | 5.73 | 1900000  |          | 1200000  | 10.60  |
| P27671 | Ras-specific guanine nucleotide-releasing factor 1 OS=Mus musculus GN=Rasgrf1 PE=1    |   | 1.0301109 | 1  | 1   | 1  | 144.011 | 7.17 | 1300000  |          |          | 2.81   |
| Q8BU30 | Isoleucine--tRNA ligase, cytoplasmic OS=Mus musculus GN=lars PE=1 SV=2                |   | 1.2678288 | 1  | 1   | 1  | 144.179 | 6.55 | 2300000  |          |          | 2.91   |
| Q80YE4 | Serine/threonine-protein kinase LMTK1 OS=Mus musculus GN=Aatk PE=1 SV=1               |   | 1.3919414 | 1  | 2   | 1  | 144.517 | 4.55 | 920000   |          | 470000   | 5.95   |
| Q5SUR0 | Phosphoribosylformylglycinamide synthase OS=Mus musculus GN=Pfas PE=1 SV=1            |   | 0.8975318 | 1  | 1   | 1  | 144.538 | 5.67 | 910000   |          |          | 1.86   |
| Q61137 | Astrotactin-1 OS=Mus musculus GN=Astn1 PE=1 SV=4                                      |   | 6.5284178 | 5  | 11  | 5  | 144.791 | 5.21 | 1400000  | 2500000  | 2200000  | 34.87  |
| E9PZ19 | Protein turtle homolog B OS=Mus musculus GN=lgsf9b PE=1 SV=1                          |   | 2.1084337 | 2  | 2   | 2  | 144.86  | 6.7  | 810000   |          |          | 4.81   |
| A2AFR3 | FERM and PDZ domain-containing protein 4 OS=Mus musculus GN=Frmpd4 PE=1 SV=1          |   | 1.5151515 | 1  | 1   | 1  | 144.887 | 5.25 |          |          |          | 2.63   |
| Q7TMB8 | Cytoplasmic FMR1-interacting protein 1 OS=Mus musculus GN=Cyfp1 PE=1 SV=1             |   | 11.492418 | 13 | 24  | 4  | 145.148 | 6.9  | 3700000  | 260000   | 2100000  | 58.82  |
| Q6PGL7 | WASH complex subunit FAM21 OS=Mus musculus GN=Fam21 PE=1 SV=1                         |   | 3.1484258 | 3  | 3   | 3  | 145.224 | 4.77 | 2000000  |          | 1600000  | 8.05   |
| Q5SQX6 | Cytoplasmic FMR1-interacting protein 2 OS=Mus musculus GN=Cyfp2 PE=1 SV=2             |   | 18.11652  | 21 | 47  | 12 | 145.565 | 7.05 | 13000000 | 2300000  | 8000000  | 120.93 |
| Q99NB9 | Splicing factor 3B subunit 1 OS=Mus musculus GN=Sf3b1 PE=1 SV=1                       |   | 4.0644172 | 4  | 9   | 4  | 145.724 | 7.09 | 3900000  | 310000   | 2900000  | 26.11  |
| Q58A65 | C-Jun-amino-terminal kinase-interacting protein 4 OS=Mus musculus GN=Spag9 PE=1 S     |   | 3.9364118 | 4  | 6   | 4  | 146.129 | 5.15 | 1700000  |          | 1500000  | 17.19  |
| Q64331 | Unconventional myosin-VI OS=Mus musculus GN=Myo6 PE=1 SV=1                            |   | 5.2173913 | 5  | 8   | 5  | 146.317 | 8.85 | 1000000  |          | 900000   | 26.43  |
| Q61527 | Receptor tyrosine-protein kinase erbB-4 OS=Mus musculus GN=Erbb4 PE=1 SV=5            |   | 0.6880734 | 1  | 1   | 1  | 146.759 | 6.38 |          |          |          | 2.58   |
| Q9JM52 | Misshapen-like kinase 1 OS=Mus musculus GN=Mink1 PE=1 SV=3                            |   | 6.8042813 | 8  | 11  | 6  | 147.203 | 7.44 | 2400000  |          | 1400000  | 28.39  |
| Q9ESN9 | C-Jun-amino-terminal kinase-interacting protein 3 OS=Mus musculus GN=Mapk8ip3 PE=     |   | 1.2715034 | 1  | 1   | 1  | 147.469 | 5.45 |          |          | 680000   | 3.26   |
| Q6ZPQ6 | Membrane-associated phosphatidylinositol transfer protein 2 OS=Mus musculus GN=Ptfp   |   | 7.6404494 | 7  | 13  | 7  | 147.942 | 7.93 | 7000000  | 1600000  | 4700000  | 39.01  |
| Q9CPW0 | Contactin-associated protein-like 2 OS=Mus musculus GN=Cntnap2 PE=1 SV=2              |   | 8.7087087 | 10 | 19  | 10 | 148.103 | 6.77 | 3500000  | 1700000  | 2000000  | 50.18  |
| F6SEU4 | Ras/Rap GTPase-activating protein SynGAP OS=Mus musculus GN=Syngap1 PE=1 SV=          |   | 20.746269 | 23 | 52  | 22 | 148.145 | 8.98 | 18000000 | 1600000  | 14000000 | 153.78 |
| Q80TK0 | Uncharacterized protein KIAA1107 OS=Mus musculus GN=Kiaa1107 PE=1 SV=5                |   | 7.669832  | 7  | 11  | 7  | 148.649 | 6.51 | 1400000  |          | 1400000  | 29.18  |
| Q8K4Q0 | Regulatory-associated protein of mTOR OS=Mus musculus GN=Rptor PE=1 SV=1              |   | 2.8464419 | 3  | 4   | 3  | 149.375 | 6.87 | 1800000  |          | 1200000  | 10.56  |
| O70133 | ATP-dependent RNA helicase A OS=Mus musculus GN=Dhx9 PE=1 SV=2                        |   | 12.608696 | 14 | 27  | 14 | 149.381 | 6.83 | 16000000 | 2500000  | 7700000  | 85.95  |
| Q7TT37 | Elongator complex protein 1 OS=Mus musculus GN=lkbpk PE=1 SV=2                        |   | 2.3255814 | 2  | 4   | 2  | 149.489 | 6    | 1200000  | 210000   | 490000   | 12.39  |
| Q8BY19 | Tenascin-R OS=Mus musculus GN=Tnr PE=1 SV=2                                           |   | 31.07511  | 35 | 117 | 35 | 149.495 | 4.94 | 28000000 | 14000000 | 35000000 | 353.25 |

|        |                                                                                        |           |    |    |    |         |      |          |         |          |        |
|--------|----------------------------------------------------------------------------------------|-----------|----|----|----|---------|------|----------|---------|----------|--------|
| Q62077 | 1-phosphatidylinositol 4,5-bisphosphate phosphodiesterase gamma-1 OS=Mus musculus      | 2.2273425 | 2  | 2  | 2  | 149.573 | 5.8  | 1200000  |         | 1000000  | 5.39   |
| Q6A026 | Sister chromatid cohesion protein PDS5 homolog A OS=Mus musculus GN=Pds5a PE=1         | 1.2012012 | 1  | 1  | 1  | 150.232 | 7.85 | 340000   |         |          | 3.23   |
| P83510 | Traf2 and NCK-interacting protein kinase OS=Mus musculus GN=Tnik PE=1 SV=2             | 4.30839   | 4  | 7  | 2  | 150.274 | 7.27 | 3300000  |         | 680000   | 21.85  |
| Q6P9K8 | Caskin-1 OS=Mus musculus GN=Caskin1 PE=1 SV=2                                          | 13.207547 | 12 | 21 | 12 | 150.403 | 9.17 | 6200000  | 1000000 | 4900000  | 68.17  |
| Q9JIX8 | Apoptotic chromatin condensation inducer in the nucleus OS=Mus musculus GN=Acin1 P     | 7.7727952 | 7  | 13 | 7  | 150.629 | 5.91 | 1900000  |         | 1900000  | 42.29  |
| Q5XJV6 | Serine/threonine-protein kinase LMTK3 OS=Mus musculus GN=Lmtk3 PE=1 SV=1               | 0.6320225 | 1  | 1  | 1  | 150.798 | 4.88 | 1300000  |         |          | 2.05   |
| P51830 | Adenylate cyclase type 9 OS=Mus musculus GN=Adcy9 PE=1 SV=1                            | 3.8433112 | 4  | 5  | 4  | 150.857 | 7.21 | 1800000  |         | 1500000  | 13.75  |
| Q7TPV4 | Myb-binding protein 1A OS=Mus musculus GN=Mybbp1a PE=1 SV=2                            | 4.6130952 | 4  | 7  | 4  | 151.942 | 8.95 | 830000   |         | 640000   | 19.81  |
| Q3UJB9 | Enhancer of mRNA-decapping protein 4 OS=Mus musculus GN=Edc4 PE=1 SV=2                 | 1.0668563 | 1  | 1  | 1  | 152.389 | 5.78 |          |         | 610000   | 2.61   |
| Q8BMG7 | Rab3 GTPase-activating protein non-catalytic subunit OS=Mus musculus GN=Rab3gap2       | 1.317716  | 2  | 4  | 2  | 152.438 | 6.23 | 2000000  |         | 1300000  | 9.28   |
| Q61595 | Kinectin OS=Mus musculus GN=Ktn1 PE=1 SV=1                                             | 4.6721929 | 6  | 8  | 6  | 152.498 | 5.86 | 2000000  |         | 1100000  | 24.83  |
| Q80TJ1 | Calcium-dependent secretion activator 1 OS=Mus musculus GN=Cadps PE=1 SV=3             | 23.02583  | 21 | 46 | 21 | 153.016 | 5.74 | 30000000 | 3000000 | 17000000 | 127.83 |
| O88322 | Nidogen-2 OS=Mus musculus GN=Nid2 PE=1 SV=2                                            | 3.7776194 | 3  | 5  | 3  | 153.816 | 5.38 | 2200000  | 1400000 | 3200000  | 15.71  |
| O35099 | Mitogen-activated protein kinase kinase kinase 5 OS=Mus musculus GN=Map3k5 PE=1 S      | 0.5072464 | 1  | 3  | 1  | 154.414 | 5.78 | 4900000  | 1700000 | 3300000  | 6.70   |
| Q8BZH4 | Pogo transposable element with ZNF domain OS=Mus musculus GN=Pogz PE=1 SV=2            | 1.8452803 | 2  | 2  | 2  | 154.812 | 7.52 | 710000   |         |          | 6.14   |
| Q99P88 | Nuclear pore complex protein Nup155 OS=Mus musculus GN=Nup155 PE=1 SV=1                | 0.9345794 | 1  | 1  | 1  | 155.019 | 6.15 |          |         | 650000   | 3.29   |
| Q9R017 | YLP motif-containing protein 1 OS=Mus musculus GN=Ylpm1 PE=2 SV=2                      | 0.7936508 | 1  | 1  | 1  | 155.032 | 6.65 | 1300000  |         |          | 2.37   |
| P15208 | Insulin receptor OS=Mus musculus GN=Insr PE=1 SV=2                                     | 2.1137026 | 2  | 3  | 2  | 155.51  | 5.95 | 370000   |         | 670000   | 8.81   |
| Q922J3 | CAP-Gly domain-containing linker protein 1 OS=Mus musculus GN=Clip1 PE=1 SV=1          | 10.424155 | 11 | 20 | 10 | 155.718 | 5.24 | 3300000  | 510000  | 2500000  | 63.88  |
| O54991 | Contactin-associated protein 1 OS=Mus musculus GN=Cntnap1 PE=1 SV=2                    | 4.9819495 | 6  | 11 | 6  | 156.212 | 7.06 | 6300000  | 2000000 | 2500000  | 27.34  |
| Q6PB66 | Leucine-rich PPR motif-containing protein, mitochondrial OS=Mus musculus GN=Lrpprc F   | 5.8908046 | 8  | 16 | 8  | 156.516 | 6.83 | 2700000  | 1100000 | 2700000  | 40.60  |
| Q9WU60 | Attractin OS=Mus musculus GN=Atrn PE=1 SV=3                                            | 1.8207283 | 2  | 2  | 2  | 157.954 | 7.27 |          |         | 370000   | 4.08   |
| Q5SW75 | Protein phosphatase Slingshot homolog 2 OS=Mus musculus GN=Ssh2 PE=1 SV=2              | 0.8432888 | 1  | 1  | 1  | 158.13  | 5.67 | 1700000  |         |          | 2.22   |
| Q80Z38 | SH3 and multiple ankyrin repeat domains protein 2 OS=Mus musculus GN=Shank2 PE=1       | 11.788618 | 11 | 23 | 11 | 158.871 | 7.18 | 6500000  |         | 4400000  | 70.29  |
| Q9Z0J4 | Nitric oxide synthase, brain OS=Mus musculus GN=Nos1 PE=1 SV=1                         | 0.9797061 | 1  | 1  | 1  | 160.371 | 7.15 | 560000   |         |          | 3.11   |
| P61406 | Telomerase-binding protein EST1A OS=Mus musculus GN=Sng6 PE=1 SV=1                     | 1.1283498 | 1  | 1  | 1  | 160.396 | 6.77 |          |         |          | 2.84   |
| P70336 | Rho-associated protein kinase 2 OS=Mus musculus GN=Rock2 PE=1 SV=1                     | 10.302594 | 13 | 22 | 13 | 160.485 | 5.99 | 5600000  | 540000  | 5000000  | 57.75  |
| P02463 | Collagen alpha-1(IV) chain OS=Mus musculus GN=Col4a1 PE=1 SV=4                         | 0.8987418 | 1  | 2  | 1  | 160.579 | 8.24 | 1700000  |         | 1200000  | 5.24   |
| Q7TPM1 | Protein PRRC2B OS=Mus musculus GN=Prrc2b PE=1 SV=1                                     | 3.5666218 | 3  | 3  | 3  | 160.814 | 8.16 | 250000   |         |          | 8.77   |
| Q8BL66 | Early endosome antigen 1 OS=Mus musculus GN=Eea1 PE=1 SV=2                             | 6.2367116 | 8  | 11 | 8  | 160.817 | 5.77 | 1300000  |         | 1600000  | 29.06  |
| B2RR83 | Probable ATP-dependent RNA helicase YTHDC2 OS=Mus musculus GN=Ythdc2 PE=1 S            | 1.1072664 | 1  | 1  | 1  | 160.99  | 8.51 | 490000   |         |          | 3.67   |
| Q80TR1 | Adhesion G protein-coupled receptor L1 OS=Mus musculus GN=Adgrl1 PE=1 SV=2             | 6.4120055 | 7  | 13 | 7  | 161.583 | 6.48 | 2600000  | 3000000 | 3100000  | 42.29  |
| Q5DU25 | IQ motif and SEC7 domain-containing protein 2 OS=Mus musculus GN=Iqsec2 PE=1 SV=       | 14.749662 | 16 | 25 | 13 | 161.687 | 8.56 | 5900000  |         | 4000000  | 75.97  |
| Q69ZH9 | Rho GTPase-activating protein 23 OS=Mus musculus GN=Arhgap23 PE=1 SV=2                 | 1.0788941 | 1  | 1  | 1  | 161.732 | 8.98 |          |         |          | 3.03   |
| A2RSJ4 | UHRF1-binding protein 1-like OS=Mus musculus GN=Uhrf1bp1 PE=1 SV=2                     | 1.0981469 | 1  | 1  | 1  | 161.838 | 6.61 | 450000   |         |          | 1.98   |
| P23116 | Eukaryotic translation initiation factor 3 subunit A OS=Mus musculus GN=Eif3a PE=1 SV= | 5.8779762 | 8  | 13 | 8  | 161.838 | 6.77 | 3300000  |         | 1900000  | 32.54  |
| Q6RHR9 | Membrane-associated guanylate kinase, WW and PDZ domain-containing protein 1 OS=       | 2.8552005 | 2  | 2  | 2  | 161.876 | 7.36 |          |         |          | 6.91   |
| Q6PAR5 | GTPase-activating protein and VPS9 domain-containing protein 1 OS=Mus musculus GN=     | 2.8806584 | 2  | 3  | 2  | 162.3   | 5.19 | 1600000  |         | 850000   | 9.63   |
| Q99M80 | Receptor-type tyrosine-protein phosphatase T OS=Mus musculus GN=Ptptr PE=1 SV=2        | 0.7565337 | 1  | 1  | 1  | 162.909 | 6.84 | 840000   |         |          | 2.49   |
| Q99NE5 | Regulating synaptic membrane exocytosis protein 1 OS=Mus musculus GN=Rims1 PE=1        | 7.2453862 | 7  | 13 | 7  | 163.061 | 9.42 | 4400000  | 270000  | 4300000  | 38.92  |
| Q92019 | WD repeat-containing protein 7 OS=Mus musculus GN=Wdr7 PE=1 SV=3                       | 9.8723976 | 12 | 25 | 12 | 163.345 | 6.9  | 7300000  | 1100000 | 4100000  | 69.49  |
| A2AP18 | 1-phosphatidylinositol 4,5-bisphosphate phosphodiesterase eta-2 OS=Mus musculus GN=    | 0.9327115 | 1  | 1  | 1  | 164.195 | 7.49 |          |         | 930000   | 3.24   |
| Q8C1B1 | Calmodulin-regulated spectrin-associated protein 2 OS=Mus musculus GN=Camsap2 PE       | 0.9582478 | 1  | 1  | 1  | 164.23  | 6.86 |          |         |          | 1.92   |
| Q4VA53 | Sister chromatid cohesion protein PDS5 homolog B OS=Mus musculus GN=Pds5b PE=1         | 1.3831259 | 1  | 2  | 1  | 164.315 | 8.5  | 1700000  |         | 890000   | 7.25   |
| Q69ZA1 | Cyclin-dependent kinase 13 OS=Mus musculus GN=Cdk13 PE=1 SV=3                          | 1.0589014 | 1  | 1  | 1  | 164.452 | 9.69 | 190000   |         |          | 2.86   |
| Q8BWT5 | Disco-interacting protein 2 homolog A OS=Mus musculus GN=Dip2a PE=1 SV=3               | 0.9192383 | 1  | 2  | 1  | 165.149 | 7.61 | 1400000  |         | 500000   | 5.68   |
| P35436 | Glutamate receptor ionotropic, NMDA 2A OS=Mus musculus GN=Grin2a PE=1 SV=2             | 1.2295082 | 2  | 3  | 2  | 165.316 | 7.01 | 2400000  |         | 1200000  | 7.13   |
| Q61838 | Pregnancy zone protein OS=Mus musculus GN=Pzp PE=1 SV=3                                | 0.6020067 | 1  | 2  | 1  | 165.748 | 6.68 | 1600000  | 720000  |          | 4.05   |

|        |                                                                                                                 |           |    |     |    |         |      |           |          |           |        |
|--------|-----------------------------------------------------------------------------------------------------------------|-----------|----|-----|----|---------|------|-----------|----------|-----------|--------|
| Q01097 | Glutamate receptor ionotropic, NMDA 2B OS=Mus musculus GN=Grin2b PE=1 SV=3                                      | 7.219973  | 9  | 16  | 9  | 165.853 | 6.87 | 4600000   |          | 3300000   | 40.75  |
| Q9CS84 | Neurexin-1 OS=Mus musculus GN=Nrxn1 PE=1 SV=3                                                                   | 8.9828269 | 11 | 18  | 10 | 166.063 | 6.09 | 6900000   | 3600000  | 5700000   | 49.07  |
| Q8CHG7 | Rap guanine nucleotide exchange factor 2 OS=Mus musculus GN=Rapgef2 PE=1 SV=2                                   | 1.8048128 | 2  | 3   | 2  | 166.311 | 6.61 | 1000000   |          | 490000    | 8.04   |
| Q80TE7 | Leucine-rich repeat-containing protein 7 OS=Mus musculus GN=Lrrc7 PE=1 SV=2                                     | 9.7986577 | 10 | 15  | 10 | 166.796 | 6.61 | 4200000   |          | 3200000   | 43.23  |
| P55937 | Golgin subfamily A member 3 OS=Mus musculus GN=Golga3 PE=1 SV=3                                                 | 2.8244788 | 3  | 6   | 3  | 167.118 | 5.4  | 510000    |          | 460000    | 17.62  |
| P08122 | Collagen alpha-2(IV) chain OS=Mus musculus GN=Col4a2 PE=1 SV=4                                                  | 1.6988869 | 2  | 3   | 2  | 167.22  | 8.48 | 4800000   |          | 2100000   | 7.55   |
| Q9JL04 | Formin-2 OS=Mus musculus GN=Fmn2 PE=1 SV=2                                                                      | 3.2319392 | 3  | 7   | 3  | 167.282 | 5.48 | 1000000   | 290000   | 1200000   | 23.62  |
| Q80TV8 | CLIP-associating protein 1 OS=Mus musculus GN=Clasp1 PE=1 SV=2                                                  | 3.3224756 | 3  | 3   | 3  | 169.123 | 9.03 | 1200000   |          | 1600000   | 8.65   |
| Q8CGM1 | Adhesion G protein-coupled receptor B2 OS=Mus musculus GN=Adgrb2 PE=1 SV=2                                      | 1.6015375 | 2  | 2   | 2  | 169.753 | 7.36 | 1600000   | 300000   |           | 4.10   |
| Q8CGC7 | Bifunctional glutamate/proline--tRNA ligase OS=Mus musculus GN=Eprs PE=1 SV=4                                   | 5.8201058 | 7  | 17  | 7  | 169.972 | 7.66 | 3400000   | 730000   | 1900000   | 52.53  |
| Q91YM2 | Rho GTPase-activating protein 35 OS=Mus musculus GN=Arhgap35 PE=1 SV=3                                          | 3.4022682 | 4  | 7   | 4  | 170.285 | 6.61 | 2300000   | 320000   | 1400000   | 18.89  |
| Q9Z277 | Tyrosine-protein kinase BAZ1B OS=Mus musculus GN=Baz1b PE=1 SV=2                                                | 2.2988506 | 2  | 2   | 2  | 170.544 | 8.6  | 1200000   |          |           | 5.96   |
| Q80U49 | Centrosomal protein of 170 kDa protein B OS=Mus musculus GN=Cep170b PE=1 SV=2                                   | 6.0355781 | 7  | 12  | 5  | 170.718 | 6.87 | 1200000   |          | 590000    | 36.31  |
| Q6ZPY7 | Lysine-specific demethylase 3B OS=Mus musculus GN=Kdm3b PE=1 SV=2                                               | 0.7682458 | 1  | 1   | 1  | 170.768 | 6.92 |           |          |           | 2.12   |
| Q80TS3 | Adhesion G protein-coupled receptor L3 OS=Mus musculus GN=Adgrl3 PE=1 SV=3                                      | 6.7013663 | 9  | 18  | 9  | 170.971 | 6.71 | 3800000   | 3600000  | 4800000   | 49.45  |
| Q3UH60 | Disco-interacting protein 2 homolog B OS=Mus musculus GN=Dip2b PE=1 SV=1                                        | 2.5412961 | 3  | 4   | 3  | 171.017 | 8.09 | 1800000   |          | 1600000   | 12.01  |
| Q80ZF8 | Adhesion G protein-coupled receptor B3 OS=Mus musculus GN=Adgrb3 PE=1 SV=2                                      | 1.9710907 | 2  | 2   | 2  | 171.202 | 7.02 | 1100000   |          |           | 5.35   |
| P97393 | Rho GTPase-activating protein 5 OS=Mus musculus GN=Arhgap5 PE=1 SV=2                                            | 1.8654231 | 2  | 2   | 2  | 172.004 | 6.34 | 1400000   |          |           | 6.05   |
| Q8R4H2 | Rho guanine nucleotide exchange factor 12 OS=Mus musculus GN=Arhgef12 PE=1 SV=2                                 | 4.4718082 | 5  | 7   | 5  | 172.242 | 5.74 | 440000    |          | 1000000   | 17.58  |
| Q8CHC4 | Synaptojanin-1 OS=Mus musculus GN=Synj1 PE=1 SV=3                                                               | 11.689962 | 16 | 36  | 16 | 172.509 | 6.89 | 1600000   | 4200000  | 8300000   | 118.38 |
| Q9EQZ7 | Regulating synaptic membrane exocytosis protein 2 OS=Mus musculus GN=Rims2 PE=1 SV=1                            | 1.7647059 | 2  | 2   | 2  | 172.757 | 9.25 | 430000    |          |           | 5.63   |
| Q99PL5 | Ribosome-binding protein 1 OS=Mus musculus GN=Rrbp1 PE=1 SV=2                                                   | 1.9937695 | 3  | 5   | 3  | 172.776 | 9.33 | 1700000   |          | 1300000   | 14.40  |
| Q6P9K9 | Neurexin-3 OS=Mus musculus GN=Nrxn3 PE=1 SV=2                                                                   | 4.6467218 | 6  | 17  | 5  | 173.318 | 6.14 | 4000000   | 1700000  | 3600000   | 55.04  |
| Q80X13 | Eukaryotic translation initiation factor 4 gamma 3 OS=Mus musculus GN=Eif4g3 PE=1 SV=1                          | 6.9664345 | 9  | 14  | 8  | 174.781 | 5.53 | 3200000   |          | 1600000   | 41.89  |
| Q80TM9 | Nischarin OS=Mus musculus GN=Nisch PE=1 SV=2                                                                    | 0.8788449 | 1  | 1   | 1  | 174.903 | 5.16 | 550000    |          |           | 2.64   |
| Q6A065 | Centrosomal protein of 170 kDa OS=Mus musculus GN=Cep170 PE=1 SV=2                                              | 2.7078086 | 3  | 5   | 1  | 174.943 | 7.17 | 1100000   |          |           | 16.21  |
| Q80U28 | MAP kinase-activating death domain protein OS=Mus musculus GN=Madd PE=1 SV=2                                    | 6.5948003 | 8  | 17  | 8  | 175.07  | 6.04 | 4200000   | 1100000  | 2700000   | 56.31  |
| Q6NZJ6 | Eukaryotic translation initiation factor 4 gamma 1 OS=Mus musculus GN=Eif4g1 PE=1 SV=1                          | 4.5625    | 6  | 10  | 5  | 175.967 | 5.4  | 2500000   |          | 1800000   | 31.99  |
| Q9QZC2 | Plexin-C1 OS=Mus musculus GN=Plxnc1 PE=1 SV=1                                                                   | 0.6988564 | 1  | 2   | 1  | 176.362 | 7.75 | 240000    |          | 510000    | 4.67   |
| P02468 | Laminin subunit gamma-1 OS=Mus musculus GN=Lamc1 PE=1 SV=2                                                      | 10.51649  | 12 | 28  | 12 | 177.185 | 5.21 | 3300000   | 840000   | 3700000   | 81.53  |
| B9EJA2 | Cortactin-binding protein 2 OS=Mus musculus GN=Cttnbp2 PE=1 SV=2                                                | 3.2160194 | 5  | 6   | 5  | 178.662 | 8.19 | 1800000   |          | 2100000   | 16.49  |
| Q8K4P8 | E3 ubiquitin-protein ligase HECW1 OS=Mus musculus GN=Hecw1 PE=1 SV=3                                            | 0.872818  | 1  | 1   | 1  | 179.356 | 5.39 | 620000    |          |           | 2.91   |
| Q6DIC0 | Probable global transcription activator SNF2L2 OS=Mus musculus GN=Smarca2 PE=1 SV=1                             | 1.3950539 | 2  | 3   | 1  | 180.141 | 7.2  | 2500000   |          | 1600000   | 7.01   |
| Q9WTK5 | A-kinase anchor protein 12 OS=Mus musculus GN=Akap12 PE=1 SV=1                                                  | 8.3135392 | 8  | 13  | 8  | 180.586 | 4.44 | 1200000   |          | 1100000   | 39.50  |
| Q3TKT4 | Transcription activator BRG1 OS=Mus musculus GN=Smarca4 PE=1 SV=1                                               | 2.9758215 | 4  | 4   | 3  | 181.313 | 8    | 1800000   |          |           | 9.76   |
| P58871 | 182 kDa tankyrase-1-binding protein OS=Mus musculus GN=Tnks1bp1 PE=1 SV=2                                       | 11.046512 | 11 | 16  | 11 | 181.714 | 4.88 | 1700000   |          | 2100000   | 47.20  |
| Q64511 | DNA topoisomerase 2-beta OS=Mus musculus GN=Top2b PE=1 SV=2                                                     | 3.0397022 | 4  | 5   | 4  | 181.795 | 8.29 | 2100000   |          | 1500000   | 14.86  |
| Q69ZK0 | Phosphatidylinositol 3,4,5-trisphosphate-dependent Rac exchanger 1 protein OS=Mus musculus GN=Pdx1 PE=1 SV=1    | 1.8787879 | 1  | 1   | 1  | 184.818 | 6.29 | 560000    |          |           | 2.20   |
| Q6NSW3 | A-kinase anchor protein SPHKAP OS=Mus musculus GN=Sphkap PE=1 SV=2                                              | 3.2009484 | 3  | 5   | 3  | 184.978 | 5.06 | 1100000   |          | 590000    | 14.20  |
| Q6PB44 | Tyrosine-protein phosphatase non-receptor type 23 OS=Mus musculus GN=Ptpn23 PE=1 SV=1                           | 1.0638298 | 1  | 1   | 1  | 185.1   | 6.8  |           |          | 400000    | 2.91   |
| Q4ACU6 | SH3 and multiple ankyrin repeat domains protein 3 OS=Mus musculus GN=Shank3 PE=1 SV=1                           | 5.433526  | 7  | 10  | 7  | 185.284 | 8.88 | 2700000   | 620000   | 2600000   | 27.76  |
| Q9QXL2 | Kinesin-like protein KIF21A OS=Mus musculus GN=Kif21a PE=1 SV=2                                                 | 7.1172249 | 7  | 13  | 7  | 186.42  | 6.27 | 6800000   | 1100000  | 7700000   | 45.19  |
| Q0KK55 | Protein very KIND OS=Mus musculus GN=Kndc1 PE=1 SV=2                                                            | 2.3536165 | 2  | 2   | 2  | 191.193 | 6.3  | 260000    |          |           | 5.60   |
| Q68FD5 | Clathrin heavy chain 1 OS=Mus musculus GN=Cltc PE=1 SV=3                                                        | 42.985075 | 63 | 247 | 63 | 191.435 | 5.69 | 210000000 | 48000000 | 190000000 | 794.25 |
| P33173 | Kinesin-like protein KIF1A OS=Mus musculus GN=Kif1a PE=1 SV=2                                                   | 3.480826  | 4  | 6   | 4  | 191.604 | 6.2  | 1800000   |          | 1400000   | 19.15  |
| Q6ZPF3 | T-lymphoma invasion and metastasis-inducing protein 2 OS=Mus musculus GN=Tiam2 PE=1 SV=1                        | 1.3411079 | 1  | 1   | 1  | 192.447 | 7.44 |           |          | 1700000   | 2.69   |
| Q8BZ05 | Arf-GAP with Rho-GAP domain, ANK repeat and PH domain-containing protein 2 OS=Mus musculus GN=Arfgap2 PE=1 SV=1 | 0.9395185 | 1  | 1   | 1  | 193.277 | 7.18 | 180000    |          |           | 2.41   |
| Q4KUS2 | Protein unc-13 homolog A OS=Mus musculus GN=Unc13a PE=1 SV=3                                                    | 2.5116822 | 3  | 5   | 3  | 193.66  | 5.25 | 1400000   |          | 2000000   | 14.10  |

|        |                                                                                        |           |    |     |    |         |      |          |          |          |        |
|--------|----------------------------------------------------------------------------------------|-----------|----|-----|----|---------|------|----------|----------|----------|--------|
| Q9Z0R4 | Intersectin-1 OS=Mus musculus GN=Itsn1 PE=1 SV=2                                       | 4.7841307 | 7  | 12  | 7  | 194.176 | 7.91 | 2900000  | 1000000  | 2700000  | 36.05  |
| Q8CHG3 | GRIP and coiled-coil domain-containing protein 2 OS=Mus musculus GN=Gcc2 PE=1 SV=      | 0.8338297 | 1  | 2   | 1  | 194.325 | 5.12 | 400000   |          | 370000   | 5.58   |
| P39447 | Tight junction protein ZO-1 OS=Mus musculus GN=Tjp1 PE=1 SV=2                          | 8.9398281 | 11 | 12  | 11 | 194.622 | 6.64 | 1900000  |          | 1600000  | 32.14  |
| Q7TT50 | Serine/threonine-protein kinase MRCK beta OS=Mus musculus GN=Cdc42bpb PE=1 SV=         | 3.1523643 | 4  | 11  | 4  | 194.63  | 6.46 | 2000000  | 260000   | 1400000  | 32.70  |
| Q3UU96 | Serine/threonine-protein kinase MRCK alpha OS=Mus musculus GN=Cdc42bpa PE=1 SV         | 0.7562536 | 1  | 1   | 1  | 195.413 | 6.51 | 1000000  |          |          | 2.05   |
| Q61292 | Laminin subunit beta-2 OS=Mus musculus GN=Lamb2 PE=1 SV=2                              | 5.0027793 | 6  | 11  | 6  | 196.451 | 6.67 | 3300000  | 1000000  | 2500000  | 32.68  |
| Q8C0T5 | Signal-induced proliferation-associated 1-like protein 1 OS=Mus musculus GN=Sipa1H1 PI | 5.1627385 | 7  | 10  | 7  | 196.909 | 8.13 | 1200000  |          | 910000   | 28.97  |
| Q6P5U7 | NACHT and WD repeat domain-containing protein 2 OS=Mus musculus GN=Nwd2 PE=1           | 1.0907003 | 1  | 2   | 1  | 197.288 | 6.15 | 1800000  |          | 1000000  | 7.44   |
| Q6A009 | E3 ubiquitin-protein ligase listerin OS=Mus musculus GN=Ltn1 PE=1 SV=3                 | 0.9620826 | 1  | 1   | 1  | 198.793 | 6.55 | 610000   |          |          | 3.67   |
| P20357 | Microtubule-associated protein 2 OS=Mus musculus GN=Map2 PE=1 SV=2                     | 35.776805 | 55 | 185 | 55 | 199.01  | 4.91 | 57000000 | 14000000 | 59000000 | 574.31 |
| P97927 | Laminin subunit alpha-4 OS=Mus musculus GN=Lama4 PE=1 SV=2                             | 0.8259912 | 1  | 1   | 1  | 201.692 | 6.21 |          |          | 670000   | 2.65   |
| Q61037 | Tuberin OS=Mus musculus GN=Tsc2 PE=1 SV=1                                              | 0.9371555 | 1  | 2   | 1  | 201.943 | 6.98 | 950000   |          | 390000   | 6.84   |
| A2A5R2 | Brefeldin A-inhibited guanine nucleotide-exchange protein 2 OS=Mus musculus GN=Arfgp   | 0.8370536 | 1  | 1   | 1  | 202.11  | 6.55 | 640000   |          |          | 3.02   |
| Q02357 | Ankyrin-1 OS=Mus musculus GN=Ank1 PE=1 SV=2                                            | 4.887218  | 6  | 6   | 6  | 204.101 | 6.55 | 1200000  |          | 920000   | 16.63  |
| B2RXS4 | Plexin-B2 OS=Mus musculus GN=Plxnb2 PE=1 SV=1                                          | 0.9771987 | 1  | 1   | 1  | 206.099 | 5.87 | 1200000  |          |          | 3.70   |
| Q9QZQ1 | Afadin OS=Mus musculus GN=Mlt4 PE=1 SV=3                                               | 3.5164835 | 5  | 6   | 5  | 206.371 | 6.32 | 1500000  |          | 670000   | 16.15  |
| A2ASQ1 | Agrin OS=Mus musculus GN=Agrn PE=1 SV=1                                                | 4.6666667 | 7  | 18  | 7  | 207.403 | 6.32 | 1700000  | 1100000  | 2000000  | 56.27  |
| Q6ZPE2 | Myotubularin-related protein 5 OS=Mus musculus GN=Sbf1 PE=1 SV=2                       | 3.2137118 | 4  | 6   | 4  | 208.561 | 7.12 | 2200000  |          | 1700000  | 18.67  |
| P70206 | Plexin-A1 OS=Mus musculus GN=Plxna1 PE=1 SV=1                                          | 3.3790919 | 6  | 10  | 3  | 210.965 | 6.9  | 2600000  | 920000   |          | 25.60  |
| P70399 | Tumor suppressor p53-binding protein 1 OS=Mus musculus GN=Tp53bp1 PE=1 SV=2            | 5.0076648 | 6  | 7   | 6  | 211.209 | 4.63 | 1400000  |          | 1200000  | 23.50  |
| P70207 | Plexin-A2 OS=Mus musculus GN=Plxna2 PE=1 SV=2                                          | 1.6895459 | 3  | 5   | 1  | 211.399 | 6.54 |          |          |          | 11.02  |
| Q3UH93 | Plexin-D1 OS=Mus musculus GN=Plxd1 PE=1 SV=1                                           | 0.6753247 | 1  | 1   | 1  | 211.473 | 7.11 |          |          | 560000   | 1.86   |
| B0V2N1 | Receptor-type tyrosine-protein phosphatase S OS=Mus musculus GN=Ptpns PE=1 SV=1        | 9.0718406 | 12 | 23  | 9  | 211.771 | 7.23 | 3200000  | 2500000  | 4400000  | 72.30  |
| Q80UG2 | Plexin-A4 OS=Mus musculus GN=Plxna4 PE=1 SV=3                                          | 4.3317485 | 6  | 12  | 3  | 212.423 | 6.83 | 870000   | 290000   | 440000   | 33.65  |
| Q80U93 | Nuclear pore complex protein Nup214 OS=Mus musculus GN=Nup214 PE=1 SV=2                | 0.7194245 | 1  | 2   | 1  | 212.847 | 7.08 | 400000   |          | 310000   | 5.69   |
| A2AQ25 | Sickle tail protein OS=Mus musculus GN=Skt PE=1 SV=1                                   | 6.0637205 | 8  | 15  | 8  | 212.905 | 7.77 | 3300000  | 250000   | 1500000  | 43.69  |
| Q8BI84 | Melanoma inhibitory activity protein 3 OS=Mus musculus GN=Mia3 PE=1 SV=2               | 4.3005181 | 6  | 8   | 6  | 213.544 | 4.75 | 1300000  |          | 930000   | 18.71  |
| G5E8K5 | Ankyrin-3 OS=Mus musculus GN=Ank3 PE=1 SV=1                                            | 8.1591025 | 13 | 26  | 10 | 213.929 | 6.7  | 7900000  | 1100000  | 6000000  | 64.79  |
| Q64487 | Receptor-type tyrosine-protein phosphatase delta OS=Mus musculus GN=Ptpnd PE=1 SV      | 9.0481172 | 12 | 32  | 9  | 214.274 | 6.55 | 2600000  | 2200000  | 2900000  | 98.42  |
| Q99104 | Unconventional myosin-Va OS=Mus musculus GN=Myo5a PE=1 SV=2                            | 21.046951 | 35 | 80  | 35 | 215.402 | 8.63 | 23000000 | 2100000  | 15000000 | 226.82 |
| Q6DFV3 | Rho GTPase-activating protein 21 OS=Mus musculus GN=Arhgap21 PE=1 SV=1                 | 1.6975309 | 2  | 5   | 2  | 215.611 | 7.64 | 600000   |          | 570000   | 18.43  |
| Q5SNZ0 | Girdin OS=Mus musculus GN=Ccdc88a PE=1 SV=2                                            | 1.4415376 | 2  | 2   | 2  | 215.786 | 6.24 | 100000   |          | 1100000  | 5.56   |
| P08775 | DNA-directed RNA polymerase II subunit RPB1 OS=Mus musculus GN=Polr2a PE=1 SV=         | 1.6751269 | 2  | 2   | 2  | 217.039 | 7.37 | 240000   |          |          | 5.36   |
| Q6PDQ2 | Chromodomain-helicase-DNA-binding protein 4 OS=Mus musculus GN=Chd4 PE=1 SV=           | 4.073107  | 5  | 6   | 4  | 217.614 | 5.81 | 2100000  |          | 1000000  | 19.46  |
| Q61464 | Zinc finger protein 638 OS=Mus musculus GN=Znf638 PE=1 SV=2                            | 3.7244898 | 5  | 6   | 5  | 217.999 | 6.89 | 1600000  |          | 1100000  | 15.52  |
| A2A690 | Protein TANC2 OS=Mus musculus GN=Tanc2 PE=1 SV=1                                       | 1.1033099 | 2  | 2   | 2  | 220.125 | 7.97 | 860000   |          |          | 4.99   |
| P70670 | Nascent polypeptide-associated complex subunit alpha, muscle-specific form OS=Mus m    | 1.920439  | 3  | 7   | 3  | 220.364 | 9.35 | 9800000  | 3500000  | 9800000  | 27.98  |
| Q61282 | Aggrecan core protein OS=Mus musculus GN=Acan PE=1 SV=2                                | 1.1257036 | 2  | 4   | 2  | 221.805 | 4.3  |          | 640000   | 1600000  | 11.73  |
| A2A8L1 | Chromodomain-helicase-DNA-binding protein 5 OS=Mus musculus GN=Chd5 PE=1 SV=           | 1.2332991 | 2  | 2   | 1  | 222.375 | 6.24 | 1400000  |          |          | 5.73   |
| Q8CJ19 | Protein-methionine sulfoxide oxidase MICAL3 OS=Mus musculus GN=Mical3 PE=1 SV=2        | 4.6161565 | 6  | 8   | 6  | 223.583 | 5.47 | 1000000  |          | 970000   | 23.95  |
| O88196 | E3 ubiquitin-protein ligase TTC3 OS=Mus musculus GN=Ttc3 PE=1 SV=2                     | 0.8590197 | 1  | 1   | 1  | 223.789 | 6.25 | 870000   |          |          | 2.84   |
| G5E870 | E3 ubiquitin-protein ligase TRIP12 OS=Mus musculus GN=Trip12 PE=1 SV=1                 | 1.2839506 | 2  | 3   | 2  | 223.988 | 8.35 | 370000   |          | 380000   | 8.98   |
| Q8C547 | HEAT repeat-containing protein 5B OS=Mus musculus GN=Heatr5b PE=1 SV=3                 | 0.6763285 | 1  | 1   | 1  | 224.176 | 7.14 | 400000   |          |          | 3.24   |
| A2AGT5 | Cytoskeleton-associated protein 5 OS=Mus musculus GN=Ckap5 PE=1 SV=1                   | 4.8720472 | 5  | 7   | 5  | 225.492 | 7.96 | 2900000  |          | 1100000  | 22.82  |
| Q62205 | Sodium channel protein type 9 subunit alpha OS=Mus musculus GN=Scn9a PE=1 SV=2         | 1.4112903 | 2  | 2   | 2  | 225.666 | 6.52 |          |          | 2700000  | 4.49   |
| D3YZU1 | SH3 and multiple ankyrin repeat domains protein 1 OS=Mus musculus GN=Shank1 PE=1       | 4.1993539 | 7  | 10  | 7  | 226.178 | 8.34 | 2800000  |          | 1400000  | 25.96  |
| Q8VDD5 | Myosin-9 OS=Mus musculus GN=Myh9 PE=1 SV=4                                             | 17.704082 | 26 | 57  | 18 | 226.232 | 5.66 | 6600000  | 640000   | 6600000  | 187.16 |
| Q8CJ40 | Rootletin OS=Mus musculus GN=Crocc PE=1 SV=2                                           | 3.0861125 | 5  | 10  | 4  | 226.809 | 5.55 | 1900000  | 1900000  | 2300000  | 24.62  |

|        |                                                                                                                         |           |     |     |     |         |       |          |         |          |         |
|--------|-------------------------------------------------------------------------------------------------------------------------|-----------|-----|-----|-----|---------|-------|----------|---------|----------|---------|
| O08638 | Myosin-11 OS=Mus musculus GN=Myh11 PE=1 SV=1                                                                            | 5.5273834 | 10  | 19  | 1   | 226.888 | 5.45  | 8700000  |         | 9900000  | 50.65   |
| Q3UH66 | Serine/threonine-protein kinase WNK2 OS=Mus musculus GN=Wnk2 PE=1 SV=2                                                  | 3.6761284 | 4   | 4   | 4   | 227.386 | 5.91  | 810000   |         | 450000   | 12.16   |
| Q6URW6 | Myosin-14 OS=Mus musculus GN=Myh14 PE=1 SV=1                                                                            | 6.25      | 9   | 15  | 5   | 228.446 | 5.55  | 820000   |         | 1400000  | 49.33   |
| A2APX8 | Sodium channel protein type 1 subunit alpha OS=Mus musculus GN=Scn1a PE=1 SV=1                                          | 4.1811847 | 6   | 16  | 6   | 228.651 | 5.87  | 7000000  | 1200000 | 3900000  | 50.96   |
| Q9R0L6 | Pericentriolar material 1 protein OS=Mus musculus GN=Pcm1 PE=1 SV=2                                                     | 0.7901235 | 1   | 1   | 1   | 228.706 | 5.01  | 180000   |         |          | 3.27    |
| Q61879 | Myosin-10 OS=Mus musculus GN=Myh10 PE=1 SV=2                                                                            | 32.540486 | 56  | 133 | 48  | 228.855 | 5.54  | 19000000 | 2500000 | 18000000 | 418.12  |
| Q7TSC1 | Protein PRRC2A OS=Mus musculus GN=Prrc2a PE=1 SV=1                                                                      | 1.1121409 | 2   | 2   | 2   | 229.063 | 9.39  | 590000   |         | 930000   | 4.26    |
| Q6GYF7 | Ral GTPase-activating protein subunit alpha-1 OS=Mus musculus GN=Ralgapa1 PE=1 SV=1                                     | 0.5896806 | 1   | 1   | 1   | 229.244 | 6.1   | 520000   |         |          | 2.69    |
| Q811P8 | Rho GTPase-activating protein 32 OS=Mus musculus GN=Arhgap32 PE=1 SV=2                                                  | 4.1168023 | 7   | 9   | 7   | 229.576 | 6.86  | 3000000  |         | 2300000  | 22.82   |
| Q80XK6 | Autophagy-related protein 2 homolog B OS=Mus musculus GN=Atg2b PE=1 SV=3                                                | 0.8192771 | 1   | 2   | 1   | 231.253 | 5.88  | 880000   |         |          | 5.96    |
| Q80YX1 | Tenascin OS=Mus musculus GN=Tnc PE=1 SV=1                                                                               | 0.8056872 | 1   | 1   | 1   | 231.659 | 4.89  |          | 530000  |          | 3.22    |
| Q9JMH9 | Unconventional myosin-XVIIIa OS=Mus musculus GN=Myo18a PE=1 SV=2                                                        | 11.170732 | 18  | 29  | 18  | 232.611 | 6.28  | 5500000  | 540000  | 4000000  | 87.92   |
| Q8BIK4 | Dedicator of cytokinesis protein 9 OS=Mus musculus GN=Dock9 PE=1 SV=2                                                   | 1.4111922 | 2   | 3   | 2   | 235.162 | 7.25  | 630000   |         | 620000   | 8.04    |
| P49025 | Citron Rho-interacting kinase OS=Mus musculus GN=Cit PE=1 SV=3                                                          | 3.6982968 | 7   | 10  | 7   | 235.242 | 6.54  | 1200000  |         | 2000000  | 24.96   |
| E9Q3L2 | Phosphatidylinositol 4-kinase alpha OS=Mus musculus GN=Pi4ka PE=1 SV=2                                                  | 8.2185273 | 15  | 30  | 15  | 236.889 | 7.06  | 6300000  | 720000  | 3900000  | 82.55   |
| Q3UGY8 | Brefeldin A-inhibited guanine nucleotide-exchange protein 3 OS=Mus musculus GN=Arfgap3 OS=Mus musculus GN=Arfgap3       | 1.1059908 | 2   | 2   | 2   | 239.938 | 5.88  | 1200000  |         | 1800000  | 5.63    |
| Q8R1A4 | Dedicator of cytokinesis protein 7 OS=Mus musculus GN=Dock7 PE=1 SV=3                                                   | 0.7511737 | 1   | 1   | 1   | 241.286 | 6.71  |          |         | 220000   | 2.54    |
| Q6JPI3 | Mediator of RNA polymerase II transcription subunit 13-like OS=Mus musculus GN=Med13 OS=Mus musculus GN=Med13           | 0.724966  | 1   | 1   | 1   | 241.604 | 6.14  |          | 400000  |          | 2.19    |
| B2RQC6 | CAD protein OS=Mus musculus GN=Cad PE=1 SV=1                                                                            | 0.6741573 | 1   | 1   | 1   | 243.084 | 6.43  | 360000   |         |          | 2.58    |
| Q6P4T2 | U5 small nuclear ribonucleoprotein 200 kDa helicase OS=Mus musculus GN=Snrnp200 OS=Mus musculus GN=Snrnp200             | 6.4138577 | 10  | 18  | 10  | 244.392 | 6.06  | 3900000  |         | 2000000  | 50.25   |
| P15508 | Spectrin beta chain, erythrocytic OS=Mus musculus GN=Sptb PE=1 SV=4                                                     | 10.949248 | 18  | 43  | 14  | 245.098 | 5.33  | 4000000  | 590000  | 3700000  | 125.98  |
| O88307 | Sortilin-related receptor OS=Mus musculus GN=Sort1 PE=1 SV=3                                                            | 2.5282167 | 3   | 3   | 3   | 246.928 | 5.54  | 680000   |         | 530000   | 7.37    |
| Q5D862 | SWISS-PROT:Q5D862 Tax_Id=9606 Gene_Symbol=FLG2 Filaggrin-2 x                                                            | 9.9121706 | 11  | 33  | 11  | 247.928 | 8.31  | 4800000  | 6200000 | 17000000 | 125.28  |
| P83741 | Serine/threonine-protein kinase WNK1 OS=Mus musculus GN=Wnk1 PE=1 SV=2                                                  | 0.3365587 | 1   | 1   | 1   | 250.779 | 6.43  |          | 880000  |          | 2.42    |
| Q71LX4 | Talin-2 OS=Mus musculus GN=Tln2 PE=1 SV=3                                                                               | 4.8842105 | 9   | 12  | 8   | 253.462 | 5.8   | 3200000  | 240000  | 890000   | 35.06   |
| B9EKR1 | Receptor-type tyrosine-protein phosphatase zeta OS=Mus musculus GN=Ptpz1 PE=1 SV=1                                      | 8.5640138 | 18  | 57  | 18  | 254.247 | 4.88  | 4000000  | 3900000 | 5400000  | 175.81  |
| Q61290 | Voltage-dependent R-type calcium channel subunit alpha-1E OS=Mus musculus GN=Cacophony1 OS=Mus musculus GN=Cacophony1   | 2.0246479 | 4   | 5   | 4   | 257.071 | 8.18  | 2000000  |         | 960000   | 13.77   |
| Q91VW5 | Golgin subfamily A member 4 OS=Mus musculus GN=Golga4 PE=1 SV=2                                                         | 0.6702413 | 1   | 1   | 1   | 257.406 | 5.36  | 400000   |         |          | 2.91    |
| O55017 | Voltage-dependent N-type calcium channel subunit alpha-1B OS=Mus musculus GN=Cacophony1 OS=Mus musculus GN=Cacophony1   | 1.7189514 | 3   | 4   | 3   | 261.314 | 8.59  | 880000   |         |          | 10.17   |
| Q5SWU9 | Acetyl-CoA carboxylase 1 OS=Mus musculus GN=Acaca PE=1 SV=1                                                             | 0.3411514 | 1   | 1   | 1   | 265.088 | 6.39  |          |         |          | 1.82    |
| Q9QX47 | Protein SON OS=Mus musculus GN=Son PE=1 SV=2                                                                            | 2.6186579 | 4   | 6   | 4   | 265.483 | 5.6   | 820000   |         | 1000000  | 20.24   |
| Q6ZQ08 | CCR4-NOT transcription complex subunit 1 OS=Mus musculus GN=Cnot1 PE=1 SV=2                                             | 1.5157895 | 3   | 3   | 3   | 266.637 | 7.11  | 1300000  |         |          | 7.11    |
| P97445 | Voltage-dependent P/Q-type calcium channel subunit alpha-1A OS=Mus musculus GN=Cacophony1 OS=Mus musculus GN=Cacophony1 | 1.2668919 | 3   | 6   | 3   | 267.477 | 8.85  | 1000000  |         | 1000000  | 15.25   |
| Q9WU42 | Nuclear receptor corepressor 2 OS=Mus musculus GN=Ncor2 PE=1 SV=3                                                       | 0.6877023 | 1   | 1   | 1   | 269.642 | 7.44  | 730000   |         |          | 2.50    |
| P26039 | Talin-1 OS=Mus musculus GN=Tln1 PE=1 SV=2                                                                               | 0.9051555 | 2   | 2   | 1   | 269.653 | 6.18  | 810000   |         |          | 4.54    |
| P14873 | Microtubule-associated protein 1B OS=Mus musculus GN=Map1b PE=1 SV=2                                                    | 29.829545 | 48  | 157 | 47  | 270.089 | 4.83  | 3300000  | 1200000 | 2800000  | 519.37  |
| P19096 | Fatty acid synthase OS=Mus musculus GN=Fasn PE=1 SV=2                                                                   | 8.7460064 | 17  | 26  | 17  | 272.257 | 6.58  | 4400000  | 830000  | 3100000  | 68.32   |
| Q99PV0 | Pre-mRNA-processing-splicing factor 8 OS=Mus musculus GN=Prpf8 PE=1 SV=2                                                | 3.4689507 | 7   | 9   | 7   | 273.443 | 8.84  | 2600000  |         | 920000   | 24.86   |
| F6ZDS4 | Nucleoprotein TPR OS=Mus musculus GN=Tpr PE=1 SV=1                                                                      | 4.6894282 | 9   | 13  | 9   | 273.824 | 5.03  | 3000000  |         | 1800000  | 40.54   |
| Q62261 | Spectrin beta chain, non-erythrocytic 1 OS=Mus musculus GN=Sptbn1 PE=1 SV=2                                             | 54.380025 | 109 | 411 | 105 | 274.052 | 5.58  | 7300000  | 1700000 | 7400000  | 1299.29 |
| Q61687 | Transcriptional regulator ATRX OS=Mus musculus GN=Atrx PE=1 SV=3                                                        | 3.19063   | 5   | 6   | 5   | 278.414 | 6.68  | 1400000  |         | 1400000  | 18.88   |
| Q8BTM8 | Filamin-A OS=Mus musculus GN=Flna PE=1 SV=5                                                                             | 0.6422365 | 1   | 1   | 1   | 281.046 | 6.04  |          |         | 450000   | 2.61    |
| Q86YZ3 | SWISS-PROT:Q86YZ3 Tax_Id=9606 Gene_Symbol=HRNR Hornerin x                                                               | 16.140351 | 15  | 37  | 15  | 282.228 | 10.04 | 1800000  | 690000  | 8600000  | 122.25  |
| P16546 | Spectrin alpha chain, non-erythrocytic 1 OS=Mus musculus GN=Sptan1 PE=1 SV=4                                            | 60.275081 | 141 | 476 | 141 | 284.422 | 5.33  | 9500000  | 4000000 | 12000000 | 1627.00 |
| Q9JLN9 | Serine/threonine-protein kinase mTOR OS=Mus musculus GN=Mtor PE=1 SV=2                                                  | 2.0792468 | 4   | 6   | 4   | 288.605 | 7.17  | 1200000  |         | 420000   | 17.32   |
| P70398 | Probable ubiquitin carboxyl-terminal hydrolase FAF-X OS=Mus musculus GN=Usp9x PE=1 SV=1                                 | 7.0339977 | 13  | 23  | 13  | 290.526 | 5.87  | 3400000  |         | 2300000  | 68.01   |
| Q80YV3 | Transformation/transcription domain-associated protein OS=Mus musculus GN=Ttrap PE=1 SV=1                               | 0.9746589 | 1   | 1   | 1   | 291.37  | 8.48  |          |         | 270000   | 2.56    |
| E9PVA8 | eIF-2-alpha kinase activator GCN1 OS=Mus musculus GN=Gcn1 PE=1 SV=1                                                     | 1.0108574 | 2   | 2   | 2   | 292.834 | 7.36  | 450000   |         | 2300000  | 4.38    |

|        |                                                                                       |           |    |     |    |          |       |          |         |          |        |
|--------|---------------------------------------------------------------------------------------|-----------|----|-----|----|----------|-------|----------|---------|----------|--------|
| Q8BT18 | Serine/arginine repetitive matrix protein 2 OS=Mus musculus GN=Srrm2 PE=1 SV=3        | 2.7746948 | 5  | 7   | 5  | 294.666  | 12.03 | 2400000  |         | 790000   | 18.27  |
| Q9QYR6 | Microtubule-associated protein 1A OS=Mus musculus GN=Map1a PE=1 SV=2                  | 27.917867 | 58 | 145 | 57 | 299.957  | 5     | 4000000  | 6000000 | 4100000  | 427.45 |
| Q9WTS6 | Teneurin-3 OS=Mus musculus GN=Tenm3 PE=1 SV=1                                         | 1.252302  | 2  | 4   | 1  | 302.874  | 6.51  | 390000   |         |          | 10.77  |
| Q9WTS5 | Teneurin-2 OS=Mus musculus GN=Tenm2 PE=1 SV=1                                         | 3.0028944 | 6  | 10  | 5  | 306.274  | 6.68  | 2200000  |         | 1200000  | 24.85  |
| Q3UHK6 | Teneurin-4 OS=Mus musculus GN=Tenm4 PE=1 SV=2                                         | 1.2630819 | 2  | 5   | 2  | 308.229  | 6.57  | 940000   | 550000  | 1200000  | 17.75  |
| Q3TLH4 | Protein PRRC2C OS=Mus musculus GN=Prrc2c PE=1 SV=3                                    | 1.054111  | 2  | 3   | 2  | 310.703  | 9.1   | 1600000  |         | 1900000  | 7.99   |
| Q61315 | Adenomatous polyposis coli protein OS=Mus musculus GN=Apc PE=1 SV=1                   | 0.456942  | 1  | 1   | 1  | 310.899  | 7.58  | 200000   |         |          | 1.98   |
| P11881 | Inositol 1,4,5-trisphosphate receptor type 1 OS=Mus musculus GN=Itpr1 PE=1 SV=2       | 6.4750818 | 14 | 23  | 14 | 312.968  | 6.04  | 3100000  | 830000  | 3000000  | 67.54  |
| Q9ESE1 | Lipopolysaccharide-responsive and beige-like anchor protein OS=Mus musculus GN=Lrb    | 1.7857143 | 4  | 5   | 1  | 316.863  | 5.69  | 440000   |         |          | 13.40  |
| Q04690 | Neurofibromin OS=Mus musculus GN=Nf1 PE=1 SV=1                                        | 2.1471313 | 5  | 8   | 5  | 319.391  | 7.39  | 1300000  |         | 610000   | 21.93  |
| Q9EPN1 | Neurobeachin OS=Mus musculus GN=Nbea PE=1 SV=1                                        | 6.1307902 | 14 | 25  | 11 | 326.536  | 6.2   | 5600000  | 850000  | 2700000  | 74.13  |
| E9Q557 | Desmoplakin OS=Mus musculus GN=Dsp PE=1 SV=1                                          | 4.960111  | 15 | 24  | 15 | 332.706  | 6.8   | 2500000  | 900000  | 8000000  | 58.17  |
| A2CG49 | Kalirin OS=Mus musculus GN=Kalrn PE=1 SV=1                                            | 4.0148448 | 10 | 15  | 7  | 336.789  | 6.07  | 1300000  |         | 1300000  | 45.20  |
| Q8BPN8 | DmX-like protein 2 OS=Mus musculus GN=Dmxl2 PE=1 SV=3                                 | 11.345646 | 24 | 54  | 24 | 337.995  | 6.42  | 11000000 | 1600000 | 8000000  | 159.38 |
| E9Q819 | Protein furry homolog OS=Mus musculus GN=Fry PE=1 SV=1                                | 1.192053  | 2  | 2   | 2  | 338.877  | 6.01  | 910000   |         |          | 4.44   |
| Q52KR3 | Protein prune homolog 2 OS=Mus musculus GN=Prune2 PE=1 SV=2                           | 1.0700389 | 2  | 3   | 2  | 339.306  | 4.46  | 630000   |         | 880000   | 8.08   |
| Q9ERU9 | E3 SUMO-protein ligase RanBP2 OS=Mus musculus GN=Ranbp2 PE=1 SV=2                     | 3.6357681 | 6  | 8   | 6  | 340.907  | 6.18  | 2300000  |         | 1100000  | 30.08  |
| Q60675 | Laminin subunit alpha-2 OS=Mus musculus GN=Lama2 PE=1 SV=2                            | 0.5772931 | 1  | 2   | 1  | 343.593  | 6.09  |          |         | 520000   | 6.22   |
| P42859 | Huntingtin OS=Mus musculus GN=Htt PE=1 SV=2                                           | 1.3465854 | 3  | 3   | 3  | 344.471  | 6.29  | 3100000  |         |          | 8.96   |
| Q0KL02 | Triple functional domain protein OS=Mus musculus GN=Trio PE=1 SV=3                    | 5.1901999 | 10 | 18  | 7  | 347.643  | 6.35  | 2800000  | 250000  | 1900000  | 53.25  |
| Q5H8C4 | Vacuolar protein sorting-associated protein 13A OS=Mus musculus GN=Vps13a PE=1 SV     | 1.0739103 | 3  | 5   | 3  | 359.173  | 6.19  | 1400000  |         | 670000   | 12.13  |
| Q62059 | Versican core protein OS=Mus musculus GN=Vcan PE=1 SV=2                               | 3.6044087 | 9  | 17  | 9  | 366.56   | 4.64  | 3500000  | 5400000 | 7500000  | 50.58  |
| Q05793 | Basement membrane-specific heparan sulfate proteoglycan core protein OS=Mus muscul    | 3.5608309 | 9  | 20  | 9  | 398.039  | 6.32  | 1600000  |         | 1800000  | 56.02  |
| Q61001 | Laminin subunit alpha-5 OS=Mus musculus GN=Lama5 PE=1 SV=4                            | 0.7799892 | 2  | 4   | 2  | 403.792  | 6.73  | 600000   |         | 580000   | 12.24  |
| Q88737 | Protein bassoon OS=Mus musculus GN=Bsn PE=1 SV=4                                      | 25.190259 | 65 | 148 | 63 | 418.587  | 7.71  | 15000000 | 1400000 | 12000000 | 462.99 |
| Q8BX70 | Vacuolar protein sorting-associated protein 13C OS=Mus musculus GN=Vps13c PE=1 SV     | 0.9338314 | 3  | 4   | 3  | 419.824  | 6.81  | 1600000  |         | 840000   | 11.66  |
| P11531 | Dystrophin OS=Mus musculus GN=Dmd PE=1 SV=3                                           | 0.8972268 | 3  | 5   | 3  | 425.566  | 5.94  | 1300000  | 530000  | 720000   | 13.48  |
| Q8C8R3 | Ankyrin-2 OS=Mus musculus GN=Ank2 PE=1 SV=2                                           | 24.807594 | 60 | 164 | 57 | 425.999  | 5.17  | 29000000 | 5400000 | 21000000 | 527.99 |
| P20930 | SWISS-PROT:P20930 Tax_Id=9606 Gene_Symbol=FLG Filaggrin x                             | 1.2804728 | 3  | 6   | 3  | 434.922  | 9.25  | 2500000  |         | 11000000 | 23.06  |
| Q7TMY8 | E3 ubiquitin-protein ligase HUWE1 OS=Mus musculus GN=Huwe1 PE=1 SV=5                  | 0.4112406 | 1  | 1   | 1  | 482.332  | 5.22  | 280000   |         |          | 2.54   |
| Q91ZX7 | Pro-low-density lipoprotein receptor-related protein 1 OS=Mus musculus GN=Lrp1 PE=1 S | 10.979098 | 34 | 73  | 34 | 504.411  | 5.36  | 3400000  | 1700000 | 4200000  | 229.90 |
| Q9JHU4 | Cytoplasmic dynein 1 heavy chain 1 OS=Mus musculus GN=Dync1h1 PE=1 SV=2               | 17.011197 | 69 | 155 | 69 | 531.71   | 6.42  | 17000000 | 1900000 | 11000000 | 441.48 |
| Q88738 | Baculoviral IAP repeat-containing protein 6 OS=Mus musculus GN=Birc6 PE=1 SV=2        | 0.3277345 | 1  | 1   | 1  | 531.833  | 6.07  | 400000   |         |          | 3.86   |
| Q9QXS1 | Plectin OS=Mus musculus GN=Plec PE=1 SV=3                                             | 12.875719 | 51 | 91  | 50 | 533.861  | 5.96  | 6700000  | 920000  | 7200000  | 252.21 |
| Q9QYX7 | Protein piccolo OS=Mus musculus GN=Pclo PE=1 SV=4                                     | 9.7277032 | 40 | 67  | 38 | 550.496  | 6.51  | 5500000  | 480000  | 5900000  | 178.86 |
| E9Q401 | Ryanodine receptor 2 OS=Mus musculus GN=Ryr2 PE=1 SV=1                                | 2.8393073 | 11 | 19  | 11 | 564.458  | 6.09  | 2900000  |         | 1700000  | 49.47  |
| A2AN08 | E3 ubiquitin-protein ligase UBR4 OS=Mus musculus GN=Ubr4 PE=1 SV=1                    | 0.2123552 | 1  | 2   | 1  | 571.927  | 6.06  | 1100000  |         | 770000   | 4.46   |
| Q9QXZ0 | Microtubule-actin cross-linking factor 1 OS=Mus musculus GN=Macf1 PE=1 SV=2           | 5.847158  | 31 | 49  | 30 | 831.362  | 5.43  | 3700000  |         | 3000000  | 148.84 |
| Q91ZU6 | Dystonin OS=Mus musculus GN=Dst PE=1 SV=2                                             | 1.8260517 | 9  | 11  | 9  | 833.701  | 5.31  | 1000000  |         | 940000   | 32.75  |
| Q6ZWR6 | Nesprin-1 OS=Mus musculus GN=Syne1 PE=1 SV=2                                          | 1.2274122 | 8  | 12  | 8  | 1009.295 | 5.59  | 2400000  |         | 1400000  | 34.43  |
