# Supplementary material for: Ultra-High Mass Resolution MALDI Imaging Mass Spectrometry of Proteins and Metabolites in a Mouse Model of Glioblastoma
Source: PubMed Central journal article supplement (PMC5429601; doi:10.1038/s41598-017-00703-w), 2017-04-04
Supplement: 41598_2017_703_MOESM3_ESM.pdf [file 41598_2017_703_MOESM3_ESM.pdf]

| Accession | Description                                                                                           | Contaminant | Coverage | # Peptides | # PSMs | # Unique Peptides | MW [kDa] | calc. pI | Area: F5: Sample | Area: F4: Sample | Area: F6: Sample | Score Sequest HT |
|-----------|-------------------------------------------------------------------------------------------------------|-------------|----------|------------|--------|-------------------|----------|----------|------------------|------------------|------------------|------------------|
| P62892    | 60S ribosomal protein L39 OS=Mus musculus GN=Rpl39 PE=1 SV=2                                          |             | 19.60784 | 1          | 3      | 1                 | 6.403    | 12.56    | 4500000          | 4200000          | 3300000          | 8.101977         |
| Q8R111    | Cytochrome b-c1 complex subunit 9 OS=Mus musculus GN=Uqcrl0 PE=1 SV=1                                 |             | 26.5625  | 1          | 6      | 1                 | 7.441    | 9.19     | 17000000         | 9100000          | 8200000          | 22.29919         |
| P62858    | 40S ribosomal protein S28 OS=Mus musculus GN=Rps28 PE=1 SV=1                                          |             | 30.43478 | 2          | 3      | 2                 | 7.836    | 10.7     | 10000000         | 21000000         |                  | 10.04869         |
| P63213    | Guanine nucleotide-binding protein G(I)/G(S)/G(O) subunit gamma-2 OS=Mus musculus GN=Gng2 PE=1 SV=2   |             | 22.53521 | 1          | 3      | 1                 | 7.845    | 7.99     | 2300000          | 820000           | 1100000          | 9.147856         |
| Q9DAS9    | Guanine nucleotide-binding protein G(I)/G(S)/G(O) subunit gamma-12 OS=Mus musculus GN=Gng12 PE=1 SV=3 |             | 15.27778 | 1          | 1      | 1                 | 7.992    | 8.97     | 650000           |                  |                  | 2.037953         |
| Q9CR64    | Protein kish-A OS=Mus musculus GN=Tmem167a PE=1 SV=1                                                  |             | 12.5     | 1          | 1      | 1                 | 8.068    | 8.95     |                  | 1500000          |                  | 2.285073         |
| Q9J18     | 60S ribosomal protein L38 OS=Mus musculus GN=Rpl38 PE=1 SV=3                                          |             | 28.57143 | 2          | 13     | 2                 | 8.199    | 10.1     | 4200000          | 3000000          | 2900000          | 29.35109         |
| P63216    | Guanine nucleotide-binding protein G(I)/G(S)/G(O) subunit gamma-3 OS=Mus musculus GN=Gng3 PE=1 SV=1   |             | 20       | 1          | 3      | 1                 | 8.299    | 7.78     | 2600000          | 820000           | 460000           | 7.921583         |
| Q9CPQ1    | Cytochrome c oxidase subunit 6C OS=Mus musculus GN=Cox6c PE=1 SV=3                                    |             | 28.94737 | 3          | 5      | 3                 | 8.464    | 10.14    | 8300000          | 5600000          | 2800000          | 10.42596         |
| P59648    | FXYD domain-containing ion transport regulator 7 OS=Mus musculus GN=Fxyd7 PE=3 SV=1                   |             | 16.25    | 1          | 3      | 1                 | 8.481    | 7.84     | 4600000          | 2900000          | 2000000          | 6.971987         |
| P62309    | Small nuclear ribonucleoprotein G OS=Mus musculus GN=Snrpg PE=1 SV=1                                  |             | 15.78947 | 1          | 1      | 1                 | 8.49     | 8.88     | 1100000          |                  |                  | 3.235302         |
| P29595    | NEDD8 OS=Mus musculus GN=Nedd8 PE=1 SV=2                                                              |             | 13.58025 | 1          | 3      | 1                 | 8.967    | 7.25     | 8000000          | 7600000          | 6500000          | 9.017698         |
| Q9CR20    | Immediate early response 3-interacting protein 1 OS=Mus musculus GN=Ier3ip1 PE=3 SV=1                 |             | 24.39024 | 1          | 1      | 1                 | 9.011    | 8.22     |                  | 850000           |                  | 3.230605         |
| Q9CQR2    | 40S ribosomal protein S21 OS=Mus musculus GN=Rps21 PE=1 SV=1                                          |             | 12.04819 | 1          | 2      | 1                 | 9.136    | 8.51     |                  | 13000000         | 5500000          | 5.815672         |
| Q62425    | Cytochrome c oxidase subunit NDUF4A OS=Mus musculus GN=Ndufa4 PE=1 SV=2                               |             | 26.82927 | 2          | 3      | 2                 | 9.321    | 9.52     | 3600000          | 3800000          |                  | 7.781106         |
| Q9D8X0    | Protein MANBAL OS=Mus musculus GN=Manbal PE=3 SV=2                                                    |             | 14.11765 | 1          | 1      | 1                 | 9.334    | 9.38     |                  |                  | 190000           | 3.03163          |
| Q6ZWU9    | 40S ribosomal protein S27 OS=Mus musculus GN=Rps27 PE=1 SV=3                                          |             | 38.09524 | 3          | 10     | 1                 | 9.455    | 9.45     | 5500000          | 15000000         | 13000000         | 26.09497         |
| Q6ZWW3    | 40S ribosomal protein S27-like OS=Mus musculus GN=Rps27l PE=1 SV=3                                    |             | 38.09524 | 3          | 9      | 1                 | 9.471    | 9.45     | 8400000          | 9500000          | 8700000          | 21.86399         |
| Q810Q5    | Normal mucosa of esophagus-specific gene 1 protein OS=Mus musculus GN=Nmes1 PE=1 SV=1                 |             | 18.07229 | 1          | 1      | 1                 | 9.578    | 9.89     |                  | 2600000          |                  | 2.539128         |
| P20491    | High affinity immunoglobulin epsilon receptor subunit gamma OS=Mus musculus GN=Fcer1g PE=1 SV=1       |             | 23.25581 | 2          | 6      | 2                 | 9.646    | 7.97     | 3400000          | 2800000          | 2100000          | 13.25079         |
| Q9CQ69    | Cytochrome b-c1 complex subunit 8 OS=Mus musculus GN=Uqcqr PE=1 SV=3                                  |             | 10.97561 | 1          | 3      | 1                 | 9.762    | 10.26    | 2300000          | 3200000          | 1100000          | 7.01569          |
| Q9CQS8    | Protein transport protein Sec61 subunit beta OS=Mus musculus GN=Sec61b PE=1 SV=3                      |             | 21.875   | 2          | 5      | 2                 | 9.952    | 11.56    | 19000000         | 17000000         | 12000000         | 11.63555         |
| P31786    | Acyl-CoA-binding protein OS=Mus musculus GN=Dbi PE=1 SV=2                                             |             | 20.68966 | 1          | 1      | 1                 | 9.994    | 8.82     |                  | 5100000          |                  | 3.347131         |
| P56391    | Cytochrome c oxidase subunit 6B1 OS=Mus musculus GN=Cox6b1 PE=1 SV=2                                  |             | 29.06977 | 2          | 3      | 2                 | 10.065   | 8.72     | 2200000          | 2800000          | 840000           | 6.999919         |
| Q923D4    | Splicing factor 3B subunit 5 OS=Mus musculus GN=Sf3b5 PE=1 SV=1                                       |             | 17.44186 | 1          | 1      | 1                 | 10.113   | 6.35     |                  | 1000000          |                  | 2.578246         |
| Q9D1Q4    | Dolichol-phosphate mannosyltransferase subunit 3 OS=Mus musculus GN=Dpm3 PE=1 SV=1                    |             | 23.91304 | 2          | 2      | 2                 | 10.132   | 7.08     |                  | 1200000          |                  | 2.562106         |
| P18608    | Non-histone chromosomal protein HMG-14 OS=Mus musculus GN=Hmg14 PE=1 SV=2                             |             | 31.25    | 1          | 2      | 1                 | 10.146   | 9.76     |                  | 570000           | 310000           | 7.319184         |
| P61514    | 60S ribosomal protein L37a OS=Mus musculus GN=Rpl37a PE=1 SV=2                                        |             | 8.695652 | 1          | 1      | 1                 | 10.268   | 10.43    | 3000000          |                  |                  | 1.865742         |
| P62073    | Mitochondrial import inner membrane translocase subunit Tim10 OS=Mus musculus GN=Timm10 PE=1 SV=1     |             | 14.44444 | 1          | 1      | 1                 | 10.326   | 6.29     |                  | 670000           |                  | 3.336424         |
| P56135    | ATP synthase subunit f, mitochondrial OS=Mus musculus GN=Atp5j2 PE=1 SV=3                             |             | 13.63636 | 1          | 3      | 1                 | 10.337   | 9.95     | 14000000         | 7300000          | 7900000          | 7.131487         |
| P63168    | Dynein light chain 1, cytoplasmic OS=Mus musculus GN=Dynll1 PE=1 SV=1                                 |             | 37.07865 | 2          | 10     | 2                 | 10.359   | 7.4      | 1500000          | 5300000          | 530000           | 22.98514         |
| P99028    | Cytochrome b-c1 complex subunit 6, mitochondrial OS=Mus musculus GN=Uqcqh PE=1 SV=2                   |             | 44.94382 | 3          | 6      | 3                 | 10.428   | 4.87     | 6800000          | 10000000         | 4500000          | 18.60857         |
| P56565    | Protein S100-A1 OS=Mus musculus GN=S100a1 PE=1 SV=2                                                   |             | 13.82979 | 1          | 1      | 1                 | 10.498   | 4.5      |                  | 4400000          |                  | 2.831232         |
| Q9D638    | Keratin-associated protein 3-2 OS=Mus musculus GN=Krtap3-2 PE=3 SV=2                                  |             | 17.17172 | 1          | 1      | 1                 | 10.567   | 6.19     |                  | 1900000          |                  | 2.424828         |
| O70554    | Small proline-rich protein 2B OS=Mus musculus GN=Sprr2b PE=2 SV=1                                     |             | 9.183673 | 1          | 2      | 1                 | 10.727   | 7.46     | 6900000          |                  |                  | 5.456643         |
| P17515    | C-X-C motif chemokine 10 OS=Mus musculus GN=Cxcl10 PE=1 SV=1                                          |             | 12.2449  | 1          | 1      | 1                 | 10.782   | 9.82     | 1300000          |                  |                  | 2.39485          |
| P62305    | Small nuclear ribonucleoprotein E OS=Mus musculus GN=Snrpe PE=1 SV=1                                  |             | 13.04348 | 1          | 3      | 1                 | 10.797   | 9.44     | 7700000          | 6600000          | 5600000          | 7.492098         |
| Q8K215    | LYR motif-containing protein 4 OS=Mus musculus GN=Lyrm4 PE=1 SV=1                                     |             | 12.08791 | 1          | 1      | 1                 | 10.848   | 10.13    | 970000           |                  |                  | 2.817861         |
| P61957    | Small ubiquitin-related modifier 2 OS=Mus musculus GN=Sumo2 PE=1 SV=1                                 |             | 23.15789 | 2          | 6      | 2                 | 10.864   | 5.5      | 20000000         | 18000000         | 23000000         | 12.95864         |
| Q64433    | 10 kDa heat shock protein, mitochondrial OS=Mus musculus GN=Hspe1 PE=1 SV=2                           |             | 9.803922 | 1          | 1      | 1                 | 10.956   | 8.35     |                  | 2900000          |                  | 1.818684         |
| P97352    | Protein S100-A13 OS=Mus musculus GN=S100a13 PE=1 SV=1                                                 |             | 11.22449 | 1          | 2      | 1                 | 11.151   | 6.13     |                  | 700000           | 620000           | 5.275613         |
| P08207    | Protein S100-A10 OS=Mus musculus GN=S100a10 PE=1 SV=2                                                 |             | 17.52577 | 2          | 2      | 2                 | 11.179   | 6.77     |                  | 2100000          |                  | 4.284756         |
| P62806    | Histone H4 OS=Mus musculus GN=Hist1h4a PE=1 SV=2                                                      |             | 58.25243 | 12         | 100    | 12                | 11.36    | 11.36    | 1.4E+09          | 1.2E+09          | 1.5E+09          | 292.5049         |
| Q9CPQ8    | ATP synthase subunit g, mitochondrial OS=Mus musculus GN=Atp5l PE=1 SV=1                              |             | 18.4466  | 1          | 2      | 1                 | 11.417   | 9.74     | 1900000          | 1000000          |                  | 4.707243         |
| Q9DOJ8    | Parathyroid hormone-related protein OS=Mus musculus GN=Pthrh PE=1 SV=3                                |             | 10.89109 | 1          | 3      | 1                 | 11.423   | 4.22     | 5300000          | 6600000          | 4700000          | 8.318395         |
| O70404    | Vesicle-associated membrane protein 8 OS=Mus musculus GN=Vamp8 PE=1 SV=1                              |             | 20.79208 | 2          | 5      | 2                 | 11.444   | 8.19     | 1500000          | 1500000          |                  | 10.80308         |
| P47955    | 60S acidic ribosomal protein P1 OS=Mus musculus GN=Rplp1 PE=1 SV=1                                    |             | 14.03509 | 1          | 3      | 1                 | 11.468   | 4.32     | 1200000          | 1500000          | 390000           | 9.223303         |
| P63024    | Vesicle-associated membrane protein 3 OS=Mus musculus GN=Vamp3 PE=1 SV=1                              |             | 38.83495 | 4          | 12     | 1                 | 11.473   | 8.5      | 1700000          | 1400000          | 1300000          | 43.25176         |
| P63166    | Small ubiquitin-related modifier 1 OS=Mus musculus GN=Sumo1 PE=1 SV=1                                 |             | 20.79208 | 2          | 3      | 2                 | 11.55    | 5.52     |                  | 1200000          | 3500000          | 7.405226         |
| P62897    | Cytochrome c, somatic OS=Mus musculus GN=Cycc PE=1 SV=2                                               |             | 20.95238 | 2          | 6      | 2                 | 11.598   | 9.58     | 5000000          | 4100000          | 5000000          | 20.12097         |

|        |                                                                                                               |          |   |    |   |        |       |          |          |          |          |
|--------|---------------------------------------------------------------------------------------------------------------|----------|---|----|---|--------|-------|----------|----------|----------|----------|
| P17095 | High mobility group protein HMG-I/HMG-Y OS=Mus musculus GN=Hmga1 PE=1 SV=4                                    | 22.42991 | 2 | 7  | 2 | 11.607 | 10.32 | 11000000 | 12000000 | 11000000 | 19.70902 |
| P99027 | 60S acidic ribosomal protein P2 OS=Mus musculus GN=Rplp2 PE=1 SV=3                                            | 60       | 5 | 15 | 5 | 11.644 | 4.54  | 74000000 | 59000000 | 55000000 | 58.72017 |
| P10639 | Thioredoxin OS=Mus musculus GN=Txn PE=1 SV=3                                                                  | 12.38095 | 1 | 3  | 1 | 11.668 | 4.92  | 10000000 | 12000000 | 8500000  | 11.73618 |
| Q9CQZ6 | NADH dehydrogenase [ubiquinone] 1 beta subcomplex subunit 3 OS=Mus musculus GN=Ndufb3 PE=1 SV=1               | 17.30769 | 2 | 4  | 2 | 11.685 | 9.04  | 9700000  | 11000000 | 9300000  | 9.735468 |
| P62818 | Protein S100-A3 OS=Mus musculus GN=S100a3 PE=2 SV=1                                                           | 10.89109 | 1 | 2  | 1 | 11.739 | 4.78  |          | 970000   | 1600000  | 5.57858  |
| P01837 | Ig kappa chain C region OS=Mus musculus PE=1 SV=1                                                             | 41.50943 | 3 | 9  | 3 | 11.771 | 5.41  | 9500000  | 9400000  | 7300000  | 32.36418 |
| P52927 | High mobility group protein HMGI-C OS=Mus musculus GN=Hmga2 PE=1 SV=1                                         | 31.48148 | 2 | 10 | 2 | 11.812 | 10.62 | 2600000  | 4900000  | 4500000  | 32.0354  |
| P26883 | Peptidyl-prolyl cis-trans isomerase FKBP1A OS=Mus musculus GN=Fkbp1a PE=1 SV=2                                | 12.96296 | 1 | 1  | 1 | 11.915 | 8.16  |          | 1600000  |          | 3.767179 |
| Q91WS0 | CDGSH iron-sulfur domain-containing protein 1 OS=Mus musculus GN=Cisd1 PE=1 SV=1                              | 35.18519 | 3 | 14 | 3 | 12.089 | 9.06  | 11000000 | 13000000 | 9800000  | 50.46018 |
| O35143 | ATPase inhibitor, mitochondrial OS=Mus musculus GN=Atpif1 PE=1 SV=2                                           | 6.603774 | 1 | 1  | 1 | 12.151 | 9.64  | 4100000  |          |          | 2.040064 |
| P47964 | 60S ribosomal protein L36 OS=Mus musculus GN=Rpl36 PE=3 SV=2                                                  | 18.09524 | 2 | 6  | 2 | 12.208 | 11.34 | 9000000  | 7700000  | 8000000  | 12.82858 |
| P26350 | Prothymosin alpha OS=Mus musculus GN=Ptma PE=1 SV=2                                                           | 21.62162 | 3 | 14 | 3 | 12.247 | 3.79  | 6200000  | 6000000  | 5600000  | 47.23169 |
| P84089 | Enhancer of rudimentary homolog OS=Mus musculus GN=Erh PE=1 SV=1                                              | 26.92308 | 2 | 3  | 2 | 12.251 | 5.92  | 630000   | 3600000  |          | 7.364164 |
| P01631 | Ig kappa chain V-II region 26-10 OS=Mus musculus PE=1 SV=1                                                    | 11.50442 | 1 | 2  | 1 | 12.265 | 8.88  | 10000000 | 7100000  |          | 6.690285 |
| P62878 | E3 ubiquitin-protein ligase RBX1 OS=Mus musculus GN=Rbx1 PE=1 SV=1                                            | 7.407407 | 1 | 2  | 1 | 12.266 | 6.96  | 4700000  |          | 4000000  | 4.841075 |
| P19788 | Matrix Gla protein OS=Mus musculus GN=Mgp PE=3 SV=1                                                           | 23.07692 | 2 | 6  | 2 | 12.351 | 9.55  | 2500000  | 7400000  | 1100000  | 16.07163 |
| P83870 | PHD finger-like domain-containing protein 5A OS=Mus musculus GN=Phf5a PE=1 SV=1                               | 32.72727 | 3 | 4  | 3 | 12.397 | 8.41  | 1300000  | 2400000  | 900000   | 10.76346 |
| P83882 | 60S ribosomal protein L36a OS=Mus musculus GN=Rpl36a PE=1 SV=2                                                | 16.03774 | 2 | 3  | 2 | 12.433 | 10.58 | 5400000  | 10000000 |          | 7.080646 |
| P51807 | Dynein light chain Tctex-type 1 OS=Mus musculus GN=Dynl1 PE=1 SV=1                                            | 14.15929 | 1 | 1  | 1 | 12.475 | 5.08  |          | 1200000  |          | 2.650357 |
| P61804 | Dolichyl-diphosphooligosaccharide--protein glycosyltransferase subunit DAD1 OS=Mus musculus GN=Dad1 PE=1 SV=3 | 19.46903 | 2 | 5  | 2 | 12.489 | 7.08  | 4000000  | 3800000  | 3500000  | 14.2747  |
| P16254 | Signal recognition particle 14 kDa protein OS=Mus musculus GN=Srp14 PE=1 SV=1                                 | 10.90909 | 1 | 2  | 1 | 12.502 | 10.17 | 5400000  | 6000000  |          | 5.685144 |
| O55142 | 60S ribosomal protein L35a OS=Mus musculus GN=Rpl35a PE=1 SV=2                                                | 20.90909 | 3 | 8  | 3 | 12.546 | 10.89 | 2900000  | 25000000 | 26000000 | 15.54398 |
| Q99LY9 | NADH dehydrogenase [ubiquinone] iron-sulfur protein 5 OS=Mus musculus GN=Ndufs5 PE=1 SV=3                     | 23.58491 | 2 | 4  | 2 | 12.639 | 8.92  | 1400000  | 1100000  | 1000000  | 12.05376 |
| P63044 | Vesicle-associated membrane protein 2 OS=Mus musculus GN=Vamp2 PE=1 SV=2                                      | 34.48276 | 4 | 12 | 1 | 12.683 | 8.13  | 4400000  |          | 1500000  | 40.58613 |
| P48024 | Eukaryotic translation initiation factor 1 OS=Mus musculus GN=Eif1 PE=1 SV=2                                  | 47.78761 | 3 | 5  | 3 | 12.739 | 7.44  | 8100000  | 5700000  |          | 14.2734  |
| P48428 | Tubulin-specific chaperone A OS=Mus musculus GN=Tbca PE=1 SV=3                                                | 7.407407 | 1 | 2  | 1 | 12.75  | 5.27  | 910000   |          | 1400000  | 5.29217  |
| P62889 | 60S ribosomal protein L30 OS=Mus musculus GN=Rpl30 PE=1 SV=2                                                  | 58.26087 | 6 | 18 | 6 | 12.776 | 9.63  | 21000000 | 22000000 | 20000000 | 56.92119 |
| P62774 | Myotrophin OS=Mus musculus GN=Mtpn PE=1 SV=2                                                                  | 14.40678 | 1 | 1  | 1 | 12.853 | 5.52  |          | 1500000  |          | 2.99752  |
| P62855 | 40S ribosomal protein S26 OS=Mus musculus GN=Rps26 PE=1 SV=3                                                  | 20.86957 | 2 | 6  | 2 | 13.007 | 11    | 24000000 | 24000000 | 24000000 | 19.19375 |
| P03899 | NADH-ubiquinone oxidoreductase chain 3 OS=Mus musculus GN=Mtnd3 PE=1 SV=3                                     | 13.04348 | 1 | 1  | 1 | 13.21  | 4.64  |          | 1500000  |          | 2.137059 |
| P62315 | Small nuclear ribonucleoprotein Sm D1 OS=Mus musculus GN=Snrpd1 PE=1 SV=1                                     | 20.16807 | 3 | 7  | 3 | 13.273 | 11.56 | 4300000  | 3200000  | 4500000  | 18.03035 |
| Q9D1R9 | 60S ribosomal protein L34 OS=Mus musculus GN=Rpl34 PE=1 SV=2                                                  | 20.51282 | 3 | 8  | 3 | 13.284 | 11.47 | 24000000 | 36000000 | 27000000 | 16.88366 |
| P60840 | Alpha-endosulfine OS=Mus musculus GN=Ensa PE=1 SV=1                                                           | 11.57025 | 1 | 1  | 1 | 13.327 | 7.24  |          | 330000   |          | 2.403036 |
| Q9CPP6 | NADH dehydrogenase [ubiquinone] 1 alpha subcomplex subunit 5 OS=Mus musculus GN=Ndufa5 PE=1 SV=3              | 21.55172 | 2 | 4  | 2 | 13.351 | 8.1   | 4600000  | 1900000  | 38000000 | 9.652988 |
| Q9D1K2 | V-type proton ATPase subunit F OS=Mus musculus GN=Atp6v1f PE=1 SV=2                                           | 10.08403 | 1 | 3  | 1 | 13.362 | 5.82  | 2500000  | 1300000  | 1400000  | 8.114889 |
| P60867 | 40S ribosomal protein S20 OS=Mus musculus GN=Rps20 PE=1 SV=1                                                  | 25.21008 | 3 | 10 | 3 | 13.364 | 9.94  | 19000000 | 22000000 | 23000000 | 30.72694 |
| Q8R404 | MICOS complex subunit MIC13 OS=Mus musculus GN=Mic13 PE=1 SV=1                                                | 5.882353 | 1 | 1  | 1 | 13.365 | 8.63  | 5800000  |          |          | 1.855439 |
| P62317 | Small nuclear ribonucleoprotein Sm D2 OS=Mus musculus GN=Snrpd2 PE=1 SV=1                                     | 47.45763 | 5 | 16 | 5 | 13.518 | 9.91  | 16000000 | 16000000 | 13000000 | 42.06528 |
| Q9D855 | Cytochrome b-c1 complex subunit 7 OS=Mus musculus GN=Uqcrb PE=1 SV=3                                          | 24.32432 | 3 | 9  | 3 | 13.519 | 9.11  | 5800000  | 5900000  | 2700000  | 22.58943 |
| O88653 | Regulator complex protein LAMTOR3 OS=Mus musculus GN=Lamtor3 PE=1 SV=1                                        | 8.870968 | 1 | 1  | 1 | 13.544 | 7.34  | 390000   |          |          | 1.942976 |
| P0C0S6 | Histone H2A.Z OS=Mus musculus GN=H2afz PE=1 SV=2                                                              | 31.25    | 4 | 19 | 2 | 13.545 | 10.58 | 98000000 | 81000000 | 92000000 | 52.08552 |
| Q9WTT4 | V-type proton ATPase subunit G 2 OS=Mus musculus GN=Atp6v1g2 PE=1 SV=1                                        | 26.27119 | 2 | 4  | 2 | 13.643 | 10.26 | 560000   | 1600000  |          | 14.92192 |
| Q9DBG9 | Tax1-binding protein 3 OS=Mus musculus GN=Tax1bp3 PE=1 SV=1                                                   | 13.70968 | 1 | 3  | 1 | 13.714 | 8.48  | 1800000  | 2400000  | 1800000  | 7.170875 |
| Q9CR51 | V-type proton ATPase subunit G 1 OS=Mus musculus GN=Atp6v1g1 PE=1 SV=3                                        | 23.72881 | 2 | 6  | 2 | 13.716 | 7.97  | 760000   | 7400000  | 5000000  | 21.67019 |
| P62852 | 40S ribosomal protein S25 OS=Mus musculus GN=Rps25 PE=1 SV=1                                                  | 22.4     | 3 | 8  | 3 | 13.734 | 10.11 | 10000000 | 11000000 | 9200000  | 20.58092 |
| P70349 | Histidine triad nucleotide-binding protein 1 OS=Mus musculus GN=Hint1 PE=1 SV=3                               | 11.11111 | 1 | 3  | 1 | 13.768 | 6.87  | 2400000  | 3800000  | 2400000  | 7.72173  |
| P01887 | Beta-2-microglobulin OS=Mus musculus GN=B2m PE=1 SV=2                                                         | 15.96639 | 2 | 5  | 2 | 13.77  | 8.44  | 8900000  | 16000000 | 7300000  | 12.91742 |
| Q64253 | Lymphocyte antigen 6E OS=Mus musculus GN=Ly6e PE=1 SV=2                                                       | 10.76923 | 1 | 3  | 1 | 13.791 | 7.05  | 6500000  | 4900000  | 3900000  | 9.895208 |
| P19536 | Cytochrome c oxidase subunit 5B, mitochondrial OS=Mus musculus GN=Cox5b PE=1 SV=1                             | 15.625   | 2 | 3  | 2 | 13.804 | 8.38  | 2700000  | 12000000 |          | 6.949335 |
| P62320 | Small nuclear ribonucleoprotein Sm D3 OS=Mus musculus GN=Snrpd3 PE=1 SV=1                                     | 24.60317 | 2 | 8  | 2 | 13.907 | 10.32 | 8200000  | 6700000  | 6100000  | 24.24367 |
| P10853 | Histone H2B type 1-F/I/L OS=Mus musculus GN=Hist1h2bf PE=1 SV=2                                               | 46.03175 | 8 | 51 | 5 | 13.928 | 10.32 | 22000000 | 6.5E+08  | 7E+08    | 164.3978 |
| Q64524 | Histone H2B type 2-E OS=Mus musculus GN=Hist2h2be PE=1 SV=3                                                   | 34.92063 | 4 | 35 | 1 | 13.985 | 10.32 | 33000000 | 23000000 | 25000000 | 114.1996 |
| P22752 | Histone H2A type 1 OS=Mus musculus GN=Hist1h2ab PE=1 SV=3                                                     | 32.30769 | 4 | 30 | 2 | 14.127 | 11.05 | 2.4E+08  | 2.1E+08  | 2.1E+08  | 88.00238 |

|        |                                                                                                    |            |   |    |   |        |       |          |          |          |          |
|--------|----------------------------------------------------------------------------------------------------|------------|---|----|---|--------|-------|----------|----------|----------|----------|
| Q9DCG9 | Multifunctional methyltransferase subunit TRM112-like protein OS=Mus musculus GN=Trmt112 PE=1 SV=1 | 10.4       | 1 | 2  | 1 | 14.132 | 5.27  | 850000   |          | 400000   | 6.154097 |
| Q9DOT1 | NHP2-like protein 1 OS=Mus musculus GN=Snu13 PE=1 SV=4                                             | 9.375      | 1 | 3  | 1 | 14.165 | 8.46  | 12000000 | 9600000  | 7400000  | 10.63295 |
| P11031 | Activated RNA polymerase II transcriptional coactivator p15 OS=Mus musculus GN=Sub1 PE=1 SV=3      | 32.28346   | 5 | 18 | 5 | 14.418 | 9.6   | 64000000 | 59000000 | 83000000 | 53.10147 |
| P18340 | C-X-C motif chemokine 9 OS=Mus musculus GN=Cxcl9 PE=2 SV=2                                         | 11.90476   | 1 | 1  | 1 | 14.435 | 10.52 |          | 640000   |          | 1.851094 |
| P62900 | 60S ribosomal protein L31 OS=Mus musculus GN=Rpl31 PE=1 SV=1                                       | 28         | 4 | 11 | 4 | 14.454 | 10.54 | 36000000 | 48000000 | 31000000 | 27.14751 |
| Q9D757 | 60S ribosomal protein L22-like 1 OS=Mus musculus GN=Rpl22l1 PE=1 SV=1                              | 9.836066   | 1 | 1  | 1 | 14.459 | 9.45  |          | 3100000  |          | 2.578572 |
| Q9CZL2 | Uncharacterized protein C4orf32 homolog OS=Mus musculus PE=1 SV=1                                  | 8.396947   | 1 | 1  | 1 | 14.501 | 4.97  |          | 230000   |          | 2.039251 |
| P63323 | 40S ribosomal protein S12 OS=Mus musculus GN=Rps12 PE=1 SV=2                                       | 12.87879   | 2 | 2  | 2 | 14.516 | 7.24  | 24000000 | 4700000  |          | 5.059968 |
| Q6ZVV7 | 60S ribosomal protein L35 OS=Mus musculus GN=Rpl35 PE=1 SV=1                                       | 8.130081   | 1 | 3  | 1 | 14.544 | 11.05 | 40000000 | 48000000 | 46000000 | 9.339207 |
| P59708 | Splicing factor 3B subunit 6 OS=Mus musculus GN=Sf3b6 PE=1 SV=1                                    | 9.6        | 1 | 2  | 1 | 14.576 | 9.38  | 1700000  | 2000000  |          | 6.467608 |
| Q9CQV6 | Microtubule-associated proteins 1A/1B light chain 3B OS=Mus musculus GN=Map1lc3b PE=1 SV=3         | 5.6        | 1 | 3  | 1 | 14.608 | 8.43  | 3700000  | 2700000  | 2500000  | 5.648575 |
| Q9WUC3 | Lymphocyte antigen 6H OS=Mus musculus GN=Ly6h PE=1 SV=2                                            | 22.30216   | 3 | 8  | 3 | 14.659 | 7.53  | 4900000  | 5300000  | 4200000  | 21.90131 |
| Q9DBX1 | Regulator of cell cycle RGCC OS=Mus musculus GN=Rgcc PE=1 SV=1                                     | 8.029197   | 1 | 2  | 1 | 14.708 | 4.84  | 2700000  |          | 2400000  | 5.093468 |
| P67984 | 60S ribosomal protein L22 OS=Mus musculus GN=Rpl22 PE=1 SV=2                                       | 31.25      | 4 | 12 | 4 | 14.75  | 9.19  | 40000000 | 35000000 | 36000000 | 32.82258 |
| P62245 | 40S ribosomal protein S15a OS=Mus musculus GN=Rps15a PE=1 SV=2                                     | 29.23077   | 4 | 15 | 4 | 14.83  | 10.13 | 18000000 | 18000000 | 17000000 | 42.98471 |
| P16045 | Galectin-1 OS=Mus musculus GN=Lgals1 PE=1 SV=3                                                     | 37.77778   | 4 | 11 | 4 | 14.856 | 5.49  | 2000000  | 5400000  | 1900000  | 34.3309  |
| P62830 | 60S ribosomal protein L23 OS=Mus musculus GN=Rpl23 PE=1 SV=1                                       | 37.85714   | 4 | 13 | 4 | 14.856 | 10.51 | 19000000 | 17000000 | 16000000 | 33.33838 |
| Q9CQW9 | Interferon-induced transmembrane protein 3 OS=Mus musculus GN=Ifitm3 PE=1 SV=1                     | 30.65693   | 3 | 7  | 2 | 14.945 | 7.4   | 2700000  | 2400000  | 2300000  | 23.87326 |
| Q9JKC6 | Cell cycle exit and neuronal differentiation protein 1 OS=Mus musculus GN=Cend1 PE=1 SV=1          | 19.46309   | 2 | 7  | 2 | 14.978 | 8.97  | 4600000  | 4100000  | 2000000  | 24.09263 |
| Q9JJV2 | Profilin-2 OS=Mus musculus GN=Pfn2 PE=1 SV=3                                                       | 20         | 2 | 2  | 2 | 15.022 | 6.99  |          | 6300000  |          | 6.675588 |
| P02584 | SWISS-PROT:P02584 (Bos taurus) Profilin-1                                                          | x 18.57143 | 2 | 4  | 2 | 15.048 | 8.28  | 4800000  | 1200000  | 6900000  | 10.12133 |
| Q9QXA5 | U6 snRNA-associated Sm-like protein LSm4 OS=Mus musculus GN=Lsm4 PE=1 SV=1                         | 7.29927    | 1 | 3  | 1 | 15.067 | 10.05 | 2000000  | 2100000  | 1500000  | 7.829657 |
| Q9CQC7 | NADH dehydrogenase [ubiquinone] 1 beta subcomplex subunit 4 OS=Mus musculus GN=Ndufb4 PE=1 SV=3    | 7.751938   | 1 | 3  | 1 | 15.072 | 9.89  | 4100000  | 4100000  | 2000000  | 8.66014  |
| P01942 | Hemoglobin subunit alpha OS=Mus musculus GN=Hba PE=1 SV=2                                          | 26.76056   | 3 | 11 | 3 | 15.076 | 8.22  | 15000000 | 22000000 | 3600000  | 28.65335 |
| Q9CQR4 | Acyl-coenzyme A thioesterase 13 OS=Mus musculus GN=Acot13 PE=1 SV=1                                | 7.142857   | 1 | 1  | 1 | 15.173 | 8.82  |          |          | 2100000  | 2.574043 |
| P56395 | Cytochrome b5 OS=Mus musculus GN=Cyb5a PE=1 SV=2                                                   | 24.62687   | 2 | 4  | 2 | 15.232 | 5.07  | 9400000  | 11000000 | 8000000  | 18.22511 |
| Q9CQB5 | CDGSH iron-sulfur domain-containing protein 2 OS=Mus musculus GN=Cisd2 PE=1 SV=1                   | 5.185185   | 1 | 1  | 1 | 15.232 | 9.51  |          |          |          | 1.861145 |
| Q9CQN7 | 39S ribosomal protein L41, mitochondrial OS=Mus musculus GN=Mrpl41 PE=1 SV=1                       | 9.62963    | 1 | 2  | 1 | 15.252 | 9.82  | 1400000  | 1400000  |          | 4.961267 |
| P02301 | Histone H3.3C OS=Mus musculus GN=H3f3c PE=3 SV=3                                                   | 21.32353   | 4 | 23 | 4 | 15.305 | 11.14 | 1.4E+09  | 1E+09    | 1.5E+09  | 51.05982 |
| P45878 | Peptidyl-prolyl cis-trans isomerase FKBP2 OS=Mus musculus GN=Fkbp2 PE=1 SV=1                       | 10         | 1 | 3  | 1 | 15.334 | 8.88  | 2800000  | 3000000  | 1900000  | 8.172156 |
| P84086 | Complexin-2 OS=Mus musculus GN=Cplx2 PE=1 SV=1                                                     | 17.16418   | 1 | 1  | 1 | 15.385 | 5.08  |          | 620000   | 200000   | 2.589733 |
| P62849 | 40S ribosomal protein S24 OS=Mus musculus GN=Rps24 PE=1 SV=1                                       | 19.54887   | 2 | 11 | 2 | 15.413 | 10.78 | 10000000 | 8200000  | 7600000  | 31.53478 |
| P63276 | 40S ribosomal protein S17 OS=Mus musculus GN=Rps17 PE=1 SV=2                                       | 25.92593   | 4 | 14 | 4 | 15.514 | 9.85  | 11000000 | 13000000 | 11000000 | 60.03712 |
| P21460 | Cystatin-C OS=Mus musculus GN=Cst3 PE=1 SV=2                                                       | 19.28571   | 2 | 6  | 2 | 15.521 | 9     | 5100000  | 4500000  | 4000000  | 18.92113 |
| Q9CPQ3 | Mitochondrial import receptor subunit TOM22 homolog OS=Mus musculus GN=Tomm22 PE=1 SV=3            | 22.53521   | 2 | 6  | 2 | 15.527 | 4.34  | 2800000  | 3100000  | 3300000  | 23.14245 |
| Q3TGF2 | Protein FAM107B OS=Mus musculus GN=Fam107b PE=1 SV=2                                               | 6.870229   | 1 | 1  | 1 | 15.562 | 8.31  |          |          | 440000   | 2.131271 |
| P41105 | 60S ribosomal protein L28 OS=Mus musculus GN=Rpl28 PE=1 SV=2                                       | 16.05839   | 2 | 9  | 2 | 15.724 | 12.02 | 63000000 | 67000000 | 55000000 | 22.73002 |
| Q99J93 | Interferon-induced transmembrane protein 2 OS=Mus musculus GN=Ifitm2 PE=1 SV=1                     | 18.05556   | 2 | 3  | 1 | 15.733 | 7.3   |          | 930000   | 710000   | 7.852386 |
| Q62266 | Cornifin-A OS=Mus musculus GN=Sprr1a PE=1 SV=1                                                     | 16.66667   | 1 | 1  | 1 | 15.755 | 7.85  |          |          | 13000000 | 2.085301 |
| P07309 | Transthyretin OS=Mus musculus GN=Ttr PE=1 SV=1                                                     | 8.843537   | 1 | 2  | 1 | 15.766 | 6.16  | 2100000  | 2200000  |          | 6.574722 |
| P61358 | 60S ribosomal protein L27 OS=Mus musculus GN=Rpl27 PE=1 SV=2                                       | 34.55882   | 4 | 11 | 4 | 15.788 | 10.56 | 30000000 | 28000000 | 9800000  | 27.96385 |
| P62267 | 40S ribosomal protein S23 OS=Mus musculus GN=Rps23 PE=1 SV=3                                       | 7.692308   | 1 | 5  | 1 | 15.798 | 10.49 | 12000000 | 14000000 | 9100000  | 10.73585 |
| P02088 | Hemoglobin subunit beta-1 OS=Mus musculus GN=Hbb-b1 PE=1 SV=2                                      | 38.09524   | 4 | 16 | 4 | 15.83  | 7.65  | 21000000 | 24000000 | 20000000 | 48.98452 |
| P62911 | 60S ribosomal protein L32 OS=Mus musculus GN=Rpl32 PE=1 SV=2                                       | 33.33333   | 4 | 18 | 4 | 15.85  | 11.33 | 12000000 | 10000000 | 8000000  | 55.16064 |
| Q9CQI6 | Coactosin-like protein OS=Mus musculus GN=Cotl1 PE=1 SV=3                                          | 11.26761   | 2 | 3  | 2 | 15.934 | 5.4   | 3000000  | 2800000  |          | 6.263401 |
| Q9CZ8  | 40S ribosomal protein S19 OS=Mus musculus GN=Rps19 PE=1 SV=3                                       | 37.93103   | 7 | 17 | 7 | 16.076 | 10.4  | 52000000 | 44000000 | 45000000 | 48.18167 |
| P12787 | Cytochrome c oxidase subunit 5A, mitochondrial OS=Mus musculus GN=Cox5a PE=1 SV=2                  | 16.43836   | 2 | 7  | 2 | 16.091 | 6.54  | 4200000  | 4500000  | 2200000  | 21.76003 |
| Q8K5B2 | Multiple coagulation factor deficiency protein 2 homolog OS=Mus musculus GN=Mcfcd2 PE=1 SV=1       | 8.965517   | 1 | 3  | 1 | 16.158 | 4.72  | 8100000  | 8800000  | 6200000  | 9.546401 |
| Q9D7A6 | Signal recognition particle 19 kDa protein OS=Mus musculus GN=Srp19 PE=1 SV=1                      | 9.722222   | 1 | 3  | 1 | 16.181 | 9.96  | 2200000  | 1900000  | 2200000  | 10.58491 |
| P62264 | 40S ribosomal protein S14 OS=Mus musculus GN=Rps14 PE=1 SV=3                                       | 32.45033   | 6 | 23 | 6 | 16.263 | 10.05 | 56000000 | 51000000 | 53000000 | 81.28122 |
| Q9CPW4 | Actin-related protein 2/3 complex subunit 5 OS=Mus musculus GN=Arcp5 PE=1 SV=3                     | 35.76159   | 3 | 7  | 3 | 16.278 | 5.67  | 4000000  | 4500000  | 3500000  | 23.15726 |
| Q9CQX2 | Cytochrome b5 type B OS=Mus musculus GN=Cyb5b PE=1 SV=1                                            | 31.50685   | 2 | 5  | 2 | 16.308 | 4.89  | 3800000  | 5300000  | 2700000  | 16.68966 |
| Q9CQY6 | Ubiquinol-cytochrome-c reductase complex assembly factor 2 OS=Mus musculus GN=Uqcc2 PE=1 SV=1      | 9.558824   | 1 | 1  | 1 | 16.31  | 9.19  |          | 1600000  |          | 2.559959 |

|        |                                                                                                                  |          |   |    |   |        |       |          |          |          |          |
|--------|------------------------------------------------------------------------------------------------------------------|----------|---|----|---|--------|-------|----------|----------|----------|----------|
| Q9CR61 | NADH dehydrogenase [ubiquinone] 1 beta subcomplex subunit 7 OS=Mus musculus GN=Ndufb7 PE=1 SV=3                  | 16.78832 | 2 | 4  | 2 | 16.32  | 8.18  | 8900000  | 11000000 | 7700000  | 12.29208 |
| O70480 | Vesicle-associated membrane protein 4 OS=Mus musculus GN=Vamp4 PE=1 SV=1                                         | 9.929078 | 1 | 3  | 1 | 16.343 | 7.36  | 960000   |          | 590000   | 9.844923 |
| Q9CZY3 | Ubiquitin-conjugating enzyme E2 variant 1 OS=Mus musculus GN=Ube2v1 PE=1 SV=1                                    | 10.88435 | 1 | 3  | 1 | 16.344 | 7.96  | 1300000  | 1700000  |          | 9.919534 |
| P14131 | 40S ribosomal protein S16 OS=Mus musculus GN=Rps16 PE=1 SV=4                                                     | 39.0411  | 6 | 20 | 6 | 16.435 | 10.21 | 17000000 | 20000000 | 20000000 | 47.66302 |
| Q60872 | Eukaryotic translation initiation factor 1A OS=Mus musculus GN=Elf1a PE=2 SV=3                                   | 14.58333 | 2 | 5  | 2 | 16.492 | 5.24  | 26000000 | 14000000 | 13000000 | 15.11108 |
| O70591 | Prefoldin subunit 2 OS=Mus musculus GN=Pfdn2 PE=1 SV=2                                                           | 7.792208 | 1 | 1  | 1 | 16.524 | 6.58  |          | 520000   |          | 3.018255 |
| Q9D6K8 | FUN14 domain-containing protein 2 OS=Mus musculus GN=Fundc2 PE=1 SV=1                                            | 15.23179 | 2 | 5  | 2 | 16.554 | 9.7   | 3100000  | 2700000  | 1400000  | 12.45938 |
| O89086 | RNA-binding protein 3 OS=Mus musculus GN=Rbm3 PE=1 SV=1                                                          | 42.48366 | 6 | 18 | 6 | 16.595 | 7.5   | 19000000 | 17000000 | 15000000 | 53.72136 |
| P14115 | 60S ribosomal protein L27a OS=Mus musculus GN=Rpl27a PE=1 SV=5                                                   | 22.97297 | 4 | 13 | 4 | 16.595 | 11.12 | 32000000 | 28000000 | 30000000 | 36.86636 |
| Q9CQJ3 | Glia maturation factor beta OS=Mus musculus GN=Gmfb PE=1 SV=3                                                    | 14.08451 | 2 | 4  | 2 | 16.712 | 5.16  | 2100000  | 2900000  | 1500000  | 10.59421 |
| P17897 | Lysozyme C-1 OS=Mus musculus GN=Lyz1 PE=1 SV=1                                                                   | 8.108108 | 1 | 1  | 1 | 16.783 | 9.41  |          |          | 8000000  | 2.888494 |
| P63242 | Eukaryotic translation initiation factor 5A-1 OS=Mus musculus GN=Elf5a PE=1 SV=2                                 | 16.88312 | 2 | 5  | 2 | 16.821 | 5.24  | 5400000  | 2600000  | 1300000  | 18.96056 |
| P62204 | Calmodulin OS=Mus musculus GN=Calm1 PE=1 SV=2                                                                    | 41.61074 | 6 | 26 | 5 | 16.827 | 4.22  | 40000000 | 42000000 | 40000000 | 64.8691  |
| Q9ERS2 | NADH dehydrogenase [ubiquinone] 1 alpha subcomplex subunit 13 OS=Mus musculus GN=Ndufa13 PE=1 SV=3               | 18.05556 | 2 | 2  | 2 | 16.849 | 9.48  | 990000   | 4300000  |          | 5.44435  |
| Q60605 | Myosin light polypeptide 6 OS=Mus musculus GN=Myl6 PE=1 SV=3                                                     | 46.35762 | 7 | 24 | 6 | 16.919 | 4.65  | 23000000 | 26000000 | 25000000 | 69.89691 |
| Q9D898 | Actin-related protein 2/3 complex subunit 5-like protein OS=Mus musculus GN=Arpc5l PE=1 SV=1                     | 26.14379 | 2 | 2  | 2 | 16.97  | 6.8   | 3000000  | 1100000  |          | 7.942436 |
| Q9CQ92 | Mitochondrial fission 1 protein OS=Mus musculus GN=Fis1 PE=1 SV=1                                                | 17.10526 | 3 | 7  | 3 | 16.998 | 8.53  | 7500000  | 6100000  | 5300000  | 19.82989 |
| P62743 | AP-2 complex subunit sigma OS=Mus musculus GN=Ap2s1 PE=1 SV=1                                                    | 12.67606 | 2 | 4  | 2 | 17.007 | 6.18  | 14000000 | 9500000  |          | 8.721389 |
| P62843 | 40S ribosomal protein S15 OS=Mus musculus GN=Rps15 PE=1 SV=2                                                     | 8.275862 | 1 | 8  | 1 | 17.029 | 10.39 | 14000000 | 2100000  | 11000000 | 26.44467 |
| Q7TMF3 | NADH dehydrogenase [ubiquinone] 1 alpha subcomplex subunit 12 OS=Mus musculus GN=Ndufa12 PE=1 SV=2               | 6.206897 | 1 | 2  | 1 | 17.076 | 9.36  | 10000000 |          | 7200000  | 4.246865 |
| Q9CYL5 | Golgi-associated plant pathogenesis-related protein 1 OS=Mus musculus GN=Glpr2 PE=1 SV=3                         | 27.92208 | 3 | 7  | 3 | 17.08  | 9.51  | 4300000  | 3900000  | 4100000  | 25.08596 |
| P61089 | Ubiquitin-conjugating enzyme E2 N OS=Mus musculus GN=Ube2n PE=1 SV=1                                             | 7.236842 | 1 | 1  | 1 | 17.127 | 6.57  | 4700000  |          |          | 2.701234 |
| Q923G2 | DNA-directed RNA polymerases I, II, and III subunit RPABC3 OS=Mus musculus GN=Polr2h PE=1 SV=3                   | 16       | 2 | 3  | 2 | 17.132 | 4.68  |          | 1400000  | 3000000  | 7.884645 |
| P61327 | Protein mago nashi homolog OS=Mus musculus GN=Magoh PE=2 SV=1                                                    | 19.86301 | 3 | 8  | 3 | 17.153 | 6.11  | 9900000  | 6300000  | 5100000  | 21.15319 |
| P15532 | Nucleoside diphosphate kinase A OS=Mus musculus GN=Nme1 PE=1 SV=1                                                | 20.39474 | 3 | 6  | 1 | 17.197 | 7.37  |          |          | 4600000  | 13.59902 |
| P62301 | 40S ribosomal protein S13 OS=Mus musculus GN=Rps13 PE=1 SV=2                                                     | 33.77483 | 5 | 11 | 5 | 17.212 | 10.54 | 14000000 | 12000000 | 14000000 | 25.80446 |
| Q9CRB2 | H/ACA ribonucleoprotein complex subunit 2 OS=Mus musculus GN=Nhp2 PE=1 SV=1                                      | 18.95425 | 2 | 6  | 2 | 17.236 | 8.41  | 2600000  | 2300000  | 2200000  | 19.86506 |
| P61255 | 60S ribosomal protein L26 OS=Mus musculus GN=Rpl26 PE=1 SV=1                                                     | 17.24138 | 4 | 11 | 4 | 17.248 | 10.55 | 21000000 | 41000000 | 38000000 | 26.01002 |
| Q9D3P8 | Plasminogen receptor (KT) OS=Mus musculus GN=Plgrkt PE=1 SV=1                                                    | 6.802721 | 1 | 1  | 1 | 17.25  | 9.5   |          |          |          | 2.236746 |
| Q9CQH7 | Transcription factor BTF3 homolog 4 OS=Mus musculus GN=Btf3l4 PE=1 SV=1                                          | 34.17722 | 3 | 7  | 3 | 17.26  | 6.35  | 3400000  | 5200000  | 3400000  | 22.17028 |
| Q9CYR0 | Single-stranded DNA-binding protein, mitochondrial OS=Mus musculus GN=Ssbp1 PE=1 SV=1                            | 9.868421 | 1 | 6  | 1 | 17.308 | 9.92  | 4000000  | 3000000  | 2400000  | 20.63711 |
| Q01768 | Nucleoside diphosphate kinase B OS=Mus musculus GN=Nme2 PE=1 SV=1                                                | 23.02632 | 3 | 8  | 1 | 17.352 | 7.5   | 11000000 | 15000000 | 8900000  | 22.34031 |
| O09111 | NADH dehydrogenase [ubiquinone] 1 beta subcomplex subunit 11, mitochondrial OS=Mus musculus GN=Ndufb11 PE=1 SV=2 | 45.03311 | 5 | 22 | 5 | 17.433 | 5.22  | 7600000  | 6700000  | 5800000  | 66.05425 |
| Q91VS7 | Microsomal glutathione S-transferase 1 OS=Mus musculus GN=Mgst1 PE=1 SV=3                                        | 8.387097 | 1 | 4  | 1 | 17.54  | 9.66  | 5500000  | 5700000  | 4400000  | 9.991471 |
| O55128 | Histone deacetylase complex subunit SAP18 OS=Mus musculus GN=Sap18 PE=1 SV=1                                     | 7.843137 | 1 | 3  | 1 | 17.584 | 9.35  | 260000   | 2900000  | 2900000  | 8.702844 |
| Q9CQL4 | 39S ribosomal protein L20, mitochondrial OS=Mus musculus GN=Mrpl20 PE=1 SV=1                                     | 14.09396 | 2 | 2  | 2 | 17.584 | 11.11 |          | 1200000  |          | 5.050592 |
| Q9D3D9 | ATP synthase subunit delta, mitochondrial OS=Mus musculus GN=Atp5d PE=1 SV=1                                     | 8.333333 | 1 | 3  | 1 | 17.589 | 5.08  | 860000   | 1900000  | 1300000  | 8.826919 |
| P62751 | 60S ribosomal protein L23a OS=Mus musculus GN=Rpl23a PE=1 SV=1                                                   | 34.61538 | 6 | 22 | 6 | 17.684 | 10.45 | 88000000 | 87000000 | 82000000 | 59.94338 |
| P62270 | 40S ribosomal protein S18 OS=Mus musculus GN=Rps18 PE=1 SV=3                                                     | 43.42105 | 8 | 22 | 8 | 17.708 | 10.99 | 37000000 | 36000000 | 31000000 | 59.13404 |
| Q9D6U8 | Protein FAM162A OS=Mus musculus GN=Fam162a PE=1 SV=1                                                             | 10.96774 | 1 | 3  | 1 | 17.713 | 9.88  | 1600000  | 1900000  |          | 7.202684 |
| Q8BP67 | 60S ribosomal protein L24 OS=Mus musculus GN=Rpl24 PE=1 SV=2                                                     | 30.57325 | 5 | 13 | 5 | 17.768 | 11.25 | 10000000 | 12000000 | 6600000  | 35.79879 |
| P35979 | 60S ribosomal protein L12 OS=Mus musculus GN=Rpl12 PE=1 SV=2                                                     | 54.54545 | 6 | 22 | 6 | 17.794 | 9.42  | 25000000 | 17000000 | 25000000 | 75.11133 |
| Q9ERR7 | 15 kDa selenoprotein OS=Mus musculus GN=Sep15 PE=1 SV=3                                                          | 17.28395 | 2 | 4  | 2 | 17.796 | 5.35  | 3000000  | 1700000  | 2100000  | 10.98523 |
| O88188 | Lymphocyte antigen 86 OS=Mus musculus GN=Ly86 PE=1 SV=1                                                          | 11.11111 | 1 | 2  | 1 | 17.8   | 5.22  | 830000   | 920000   |          | 5.080688 |
| O54790 | Transcription factor MafG OS=Mus musculus GN=Mafg PE=1 SV=1                                                      | 4.320988 | 1 | 1  | 1 | 17.866 | 10.04 |          | 700000   |          | 1.945268 |
| Q64339 | Ubiquitin-like protein ISG15 OS=Mus musculus GN=Isg15 PE=1 SV=4                                                  | 18.01242 | 2 | 7  | 2 | 17.886 | 7.9   | 8700000  | 9000000  | 6200000  | 22.43587 |
| P62983 | Ubiquitin-40S ribosomal protein S27a OS=Mus musculus GN=Rps27a PE=1 SV=2                                         | 51.92308 | 7 | 37 | 7 | 17.939 | 9.64  | 4.3E+08  | 3.8E+08  | 3.8E+08  | 121.9283 |
| P17742 | Peptidyl-prolyl cis-trans isomerase A OS=Mus musculus GN=Ppia PE=1 SV=2                                          | 30.4878  | 5 | 27 | 5 | 17.96  | 7.9   | 57000000 | 61000000 | 48000000 | 71.86454 |
| P01592 | Immunoglobulin J chain OS=Mus musculus GN=Jchain PE=1 SV=4                                                       | 9.433962 | 1 | 4  | 1 | 18.002 | 4.89  | 860000   |          | 360000   | 9.566158 |
| Q9CQ49 | Nuclear cap-binding protein subunit 2 OS=Mus musculus GN=Ncbp2 PE=1 SV=1                                         | 7.051282 | 1 | 1  | 1 | 18.006 | 7.81  |          | 2400000  |          | 2.731159 |
| P01831 | Thy-1 membrane glycoprotein OS=Mus musculus GN=Thy1 PE=1 SV=1                                                    | 31.48148 | 4 | 10 | 4 | 18.069 | 8.97  | 20000000 | 11000000 | 9400000  | 27.84378 |
| P20801 | Troponin C, skeletal muscle OS=Mus musculus GN=Tnnc2 PE=1 SV=2                                                   | 9.375    | 2 | 4  | 1 | 18.098 | 4.2   |          |          | 870000   | 9.22579  |
| P30355 | Arachidonate 5-lipoxygenase-activating protein OS=Mus musculus GN=Alox5ap PE=1 SV=2                              | 4.968944 | 1 | 1  | 1 | 18.124 | 8.47  | 4500000  |          |          | 1.867103 |

|        |                                                                                                          |          |    |    |    |        |       |          |          |          |          |
|--------|----------------------------------------------------------------------------------------------------------|----------|----|----|----|--------|-------|----------|----------|----------|----------|
| Q9D958 | Signal peptidase complex subunit 1 OS=Mus musculus GN=Spcs1 PE=2 SV=3                                    | 7.453416 | 1  | 3  | 1  | 18.174 | 10.01 | 10000000 | 10000000 | 6600000  | 8.118435 |
| P28574 | Protein max OS=Mus musculus GN=Max PE=1 SV=1                                                             | 6.25     | 1  | 3  | 1  | 18.186 | 5.87  | 610000   | 990000   | 920000   | 8.499267 |
| O35912 | Epithelial membrane protein 3 OS=Mus musculus GN=Emp3 PE=2 SV=2                                          | 4.907975 | 1  | 1  | 1  | 18.24  | 7.66  | 1100000  |          |          | 2.291501 |
| Q9QUR7 | Peptidyl-prolyl cis-trans isomerase NIMA-interacting 1 OS=Mus musculus GN=Pin1 PE=1 SV=1                 | 12.12121 | 1  | 2  | 1  | 18.359 | 8.79  |          | 1100000  | 1000000  | 6.499946 |
| P62281 | 40S ribosomal protein S11 OS=Mus musculus GN=Rps11 PE=1 SV=3                                             | 55.6962  | 10 | 26 | 10 | 18.419 | 10.3  | 39000000 | 43000000 | 39000000 | 65.32193 |
| Q9D328 | Transmembrane protein 35 OS=Mus musculus GN=Tmem35 PE=1 SV=1                                             | 8.982036 | 1  | 1  | 1  | 18.493 | 9.99  | 900000   |          |          | 2.331799 |
| Q9R0P5 | Dextrin OS=Mus musculus GN=Dstn PE=1 SV=3                                                                | 19.39394 | 3  | 10 | 3  | 18.509 | 7.97  | 6700000  | 5200000  | 6100000  | 32.65546 |
| P18760 | Cofilin-1 OS=Mus musculus GN=Cfl1 PE=1 SV=3                                                              | 42.77108 | 6  | 20 | 6  | 18.548 | 8.09  | 53000000 | 49000000 | 38000000 | 79.28135 |
| O09167 | 60S ribosomal protein L21 OS=Mus musculus GN=Rpl21 PE=1 SV=3                                             | 20       | 4  | 6  | 4  | 18.55  | 10.49 | 2600000  | 7200000  | 9300000  | 14.11063 |
| Q64327 | Male-enhanced antigen 1 OS=Mus musculus GN=Mea1 PE=1 SV=1                                                | 7.471264 | 1  | 2  | 1  | 18.573 | 4.08  | 700000   | 670000   |          | 5.759647 |
| P60824 | Cold-inducible RNA-binding protein OS=Mus musculus GN=Cirbp PE=1 SV=1                                    | 6.395349 | 1  | 1  | 1  | 18.596 | 9.61  | 1900000  |          |          | 2.522171 |
| Q9WTK5 | S-phase kinase-associated protein 1 OS=Mus musculus GN=Skp1 PE=1 SV=3                                    | 16.56442 | 4  | 11 | 4  | 18.66  | 4.54  | 7100000  | 6000000  | 4400000  | 33.7406  |
| Q9R0Q7 | Prostaglandin E synthase 3 OS=Mus musculus GN=Ptges3 PE=1 SV=1                                           | 38.75    | 5  | 12 | 5  | 18.709 | 4.55  | 5500000  | 16000000 | 4500000  | 39.40278 |
| P61967 | AP-1 complex subunit sigma-1A OS=Mus musculus GN=Ap1s1 PE=1 SV=1                                         | 10.12658 | 1  | 3  | 1  | 18.721 | 5.73  | 6000000  | 5700000  | 4900000  | 14.38324 |
| Q9DCX2 | ATP synthase subunit d, mitochondrial OS=Mus musculus GN=Atp5h PE=1 SV=3                                 | 29.19255 | 4  | 11 | 4  | 18.738 | 5.69  | 17000000 | 24000000 | 7000000  | 24.3462  |
| O70492 | Sorting nexin-3 OS=Mus musculus GN=Snx3 PE=1 SV=3                                                        | 27.77778 | 5  | 11 | 3  | 18.746 | 8.66  | 3600000  | 2000000  | 2900000  | 29.57123 |
| Q8K194 | U4/U6.U5 small nuclear ribonucleoprotein 27 kDa protein OS=Mus musculus GN=Snrnp27 PE=1 SV=1             | 16.12903 | 2  | 4  | 2  | 18.874 | 11.62 | 1600000  | 2900000  | 2200000  | 10.35385 |
| Q8R344 | Coiled-coil domain-containing protein 12 OS=Mus musculus GN=Ccdc12 PE=1 SV=2                             | 13.85542 | 1  | 1  | 1  | 18.88  | 7.21  |          |          | 890000   | 2.956863 |
| P63325 | 40S ribosomal protein S10 OS=Mus musculus GN=Rps10 PE=1 SV=1                                             | 8.484848 | 1  | 3  | 1  | 18.904 | 10.15 | 24000000 | 24000000 | 17000000 | 12.42975 |
| Q62186 | Translocon-associated protein subunit delta OS=Mus musculus GN=Ssr4 PE=1 SV=1                            | 25       | 3  | 12 | 3  | 18.924 | 5.78  | 5700000  | 7000000  | 4900000  | 33.77591 |
| Q9CRB6 | Tubulin polymerization-promoting protein family member 3 OS=Mus musculus GN=Tppp3 PE=1 SV=1              | 7.954545 | 1  | 3  | 1  | 18.954 | 9.11  | 1800000  | 890000   | 720000   | 10.65462 |
| Q8C1M2 | Zinc finger protein 428 OS=Mus musculus GN=Znf428 PE=1 SV=1                                              | 6.25     | 1  | 1  | 1  | 18.991 | 4.23  |          |          | 420000   | 2.584441 |
| Q9CPPO | Nucleoplasmin-3 OS=Mus musculus GN=Npm3 PE=1 SV=3                                                        | 8.571429 | 1  | 3  | 1  | 19.011 | 4.82  |          | 8900000  | 9200000  | 9.019164 |
| O70493 | Sorting nexin-12 OS=Mus musculus GN=Snx12 PE=1 SV=1                                                      | 24.84848 | 4  | 6  | 2  | 19.104 | 7.34  |          | 1400000  |          | 16.23551 |
| Q8R2Q8 | Bone marrow stromal antigen 2 OS=Mus musculus GN=Bst2 PE=1 SV=1                                          | 15.69767 | 3  | 8  | 3  | 19.14  | 7.34  | 15000000 | 14000000 | 12000000 | 23.54575 |
| Q63810 | Calcineurin subunit B type 1 OS=Mus musculus GN=Ppp3r1 PE=1 SV=3                                         | 16.47059 | 2  | 5  | 2  | 19.288 | 4.81  | 3200000  | 1700000  | 2500000  | 12.05652 |
| P84104 | Serine/arginine-rich splicing factor 3 OS=Mus musculus GN=Srsf3 PE=1 SV=1                                | 36.58537 | 6  | 22 | 5  | 19.318 | 11.65 | 17000000 | 20000000 | 14000000 | 64.00657 |
| Q91WV0 | Protein Dr1 OS=Mus musculus GN=Dr1 PE=1 SV=1                                                             | 7.386364 | 1  | 2  | 1  | 19.419 | 4.75  | 2600000  |          | 2500000  | 5.797233 |
| Q9CZH7 | Matrix-remodeling-associated protein 7 OS=Mus musculus GN=Mxra7 PE=1 SV=2                                | 8.988764 | 1  | 1  | 1  | 19.445 | 4.26  |          | 510000   |          | 3.140744 |
| P63028 | Translationally-controlled tumor protein OS=Mus musculus GN=Tpt1 PE=1 SV=1                               | 55.81395 | 6  | 19 | 6  | 19.45  | 4.86  | 22000000 | 16000000 | 15000000 | 70.41846 |
| Q9JIJ8 | PRA1 family protein 2 OS=Mus musculus GN=Praf2 PE=1 SV=1                                                 | 6.179775 | 1  | 3  | 1  | 19.466 | 9.6   | 4900000  | 3100000  | 3000000  | 9.188937 |
| Q9CR09 | Ubiquitin-fold modifier-conjugating enzyme 1 OS=Mus musculus GN=Ufc1 PE=1 SV=1                           | 4.790419 | 1  | 2  | 1  | 19.469 | 7.4   | 1200000  | 1100000  |          | 3.894522 |
| Q8R2Y8 | Peptidyl-tRNA hydrolase 2, mitochondrial OS=Mus musculus GN=Pth2 PE=1 SV=1                               | 25.96685 | 3  | 6  | 3  | 19.514 | 7.42  | 2900000  | 2700000  | 2300000  | 19.54301 |
| P19783 | Cytochrome c oxidase subunit 4 isoform 1, mitochondrial OS=Mus musculus GN=Cox4i1 PE=1 SV=2              | 30.17751 | 5  | 17 | 5  | 19.518 | 9.23  | 30000000 | 33000000 | 16000000 | 48.90464 |
| Q9D938 | Transmembrane protein 160 OS=Mus musculus GN=Tmem160 PE=2 SV=1                                           | 10.6383  | 2  | 2  | 2  | 19.575 | 7.3   | 1800000  |          | 520000   | 4.60522  |
| P53996 | Cellular nucleic acid-binding protein OS=Mus musculus GN=Cnbp PE=1 SV=2                                  | 6.741573 | 1  | 1  | 1  | 19.579 | 7.58  |          | 2500000  |          | 2.624178 |
| Q59J78 | Mimitin, mitochondrial OS=Mus musculus GN=Ndufaf2 PE=1 SV=1                                              | 9.52381  | 1  | 1  | 1  | 19.616 | 8.25  | 5000000  |          |          | 2.5943   |
| Q99LW6 | YY1-associated factor 2 OS=Mus musculus GN=Yaf2 PE=1 SV=1                                                | 13.40782 | 1  | 3  | 1  | 19.643 | 9.58  | 970000   | 990000   | 830000   | 9.751854 |
| P59999 | Actin-related protein 2/3 complex subunit 4 OS=Mus musculus GN=Arcp4 PE=1 SV=3                           | 17.85714 | 4  | 10 | 4  | 19.654 | 8.43  | 13000000 | 12000000 | 11000000 | 26.01749 |
| Q3THE2 | Myosin regulatory light chain 12B OS=Mus musculus GN=Myl12b PE=1 SV=2                                    | 34.88372 | 5  | 19 | 5  | 19.767 | 4.84  | 52000000 | 45000000 | 50000000 | 57.95821 |
| Q9CXZ1 | NADH dehydrogenase [ubiquinone] iron-sulfur protein 4, mitochondrial OS=Mus musculus GN=Ndufs4 PE=1 SV=2 | 13.71429 | 2  | 6  | 2  | 19.772 | 9.99  | 4900000  | 2700000  | 3100000  | 15.85791 |
| Q9CWZ3 | RNA-binding protein 8A OS=Mus musculus GN=Rbm8a PE=1 SV=3                                                | 21.83908 | 3  | 15 | 3  | 19.876 | 6.16  | 17000000 | 17000000 | 16000000 | 50.3733  |
| Q9DCJ5 | NADH dehydrogenase [ubiquinone] 1 alpha subcomplex subunit 8 OS=Mus musculus GN=Ndufa8 PE=1 SV=2         | 12.2093  | 2  | 2  | 2  | 19.979 | 8.46  | 960000   | 7700000  |          | 5.151415 |
| Q9R0P4 | Small acidic protein OS=Mus musculus GN=Smap PE=1 SV=1                                                   | 21.54696 | 2  | 10 | 2  | 20.034 | 4.82  | 5800000  | 4600000  | 4400000  | 38.19312 |
| P62331 | ADP-ribosylation factor 6 OS=Mus musculus GN=Arf6 PE=1 SV=2                                              | 6.285714 | 1  | 3  | 1  | 20.069 | 8.95  | 4700000  | 4300000  | 3700000  | 8.24675  |
| Q9CWU4 | UPF0690 protein C1orf52 homolog OS=Mus musculus PE=1 SV=1                                                | 9.444444 | 1  | 1  | 1  | 20.089 | 5.11  | 260000   |          |          | 2.236649 |
| Q9CXZ9 | ER membrane protein complex subunit 4 OS=Mus musculus GN=Emc4 PE=1 SV=1                                  | 8.743169 | 1  | 2  | 1  | 20.103 | 8.62  |          | 1900000  | 1200000  | 4.953184 |
| Q9D365 | Signal peptidase complex subunit 3 OS=Mus musculus GN=Spcs3 PE=1 SV=1                                    | 6.666667 | 1  | 1  | 1  | 20.134 | 9.6   |          | 1100000  |          | 2.738819 |
| P28667 | MARCKS-related protein OS=Mus musculus GN=Marcks1 PE=1 SV=2                                              | 65       | 5  | 10 | 5  | 20.153 | 4.61  | 5500000  | 3500000  | 2500000  | 37.24055 |
| P61924 | Coatomer subunit zeta-1 OS=Mus musculus GN=Copz1 PE=1 SV=1                                               | 16.94915 | 2  | 2  | 2  | 20.185 | 4.81  | 470000   |          | 5000000  | 4.879141 |
| Q9CXW4 | 60S ribosomal protein L11 OS=Mus musculus GN=Rpl11 PE=1 SV=4                                             | 16.85393 | 3  | 9  | 3  | 20.24  | 9.6   | 23000000 | 23000000 | 23000000 | 24.28854 |
| O55013 | Trafficking protein particle complex subunit 3 OS=Mus musculus GN=Trappc3 PE=1 SV=1                      | 4.444444 | 1  | 3  | 1  | 20.289 | 4.96  | 910000   | 690000   | 670000   | 5.872689 |
| Q8VE22 | 28S ribosomal protein S23, mitochondrial OS=Mus musculus GN=Mrps23 PE=1 SV=1                             | 7.909605 | 1  | 3  | 1  | 20.335 | 8.59  | 1600000  | 1800000  | 1000000  | 8.812244 |



|         |                                                                                                   |          |    |    |    |        |       |          |          |          |          |
|---------|---------------------------------------------------------------------------------------------------|----------|----|----|----|--------|-------|----------|----------|----------|----------|
| Q9CXI5  | Mesencephalic astrocyte-derived neurotrophic factor OS=Mus musculus GN=Manf PE=1 SV=1             | 26.81564 | 4  | 10 | 4  | 20.361 | 8.07  | 6700000  | 5600000  | 5000000  | 33.39121 |
| P61750  | ADP-ribosylation factor 4 OS=Mus musculus GN=Arf4 PE=1 SV=2                                       | 13.88889 | 2  | 6  | 2  | 20.384 | 7.14  | 4600000  | 4800000  | 3300000  | 19.55995 |
| P61211  | ADP-ribosylation factor-like protein 1 OS=Mus musculus GN=Arl1 PE=1 SV=1                          | 7.734807 | 1  | 2  | 1  | 20.398 | 5.72  | 2300000  | 2400000  |          | 7.705759 |
| Q9QZ88  | Vacuolar protein sorting-associated protein 29 OS=Mus musculus GN=Vps29 PE=1 SV=1                 | 10.98901 | 2  | 4  | 2  | 20.483 | 6.79  | 15000000 | 9800000  | 10000000 | 11.03608 |
| P61226  | Ras-related protein Rap-2b OS=Mus musculus GN=Rap2b PE=1 SV=1                                     | 24.59016 | 4  | 7  | 3  | 20.491 | 4.81  | 700000   | 910000   |          | 17.7564  |
| Q9JUM76 | Actin-related protein 2/3 complex subunit 3 OS=Mus musculus GN=Arpc3 PE=1 SV=3                    | 7.303371 | 1  | 3  | 1  | 20.511 | 8.59  | 2500000  | 2800000  | 1700000  | 12.09214 |
| P84084  | ADP-ribosylation factor 5 OS=Mus musculus GN=Arf5 PE=1 SV=2                                       | 13.88889 | 2  | 6  | 1  | 20.517 | 6.79  | 1700000  | 2200000  | 1600000  | 19.89386 |
| P55002  | Microfibrillar-associated protein 2 OS=Mus musculus GN=Mfap2 PE=2 SV=1                            | 5.464481 | 1  | 1  | 1  | 20.565 | 4.89  |          |          | 190000   | 2.281886 |
| P97315  | Cysteine and glycine-rich protein 1 OS=Mus musculus GN=Csrp1 PE=1 SV=3                            | 39.37824 | 5  | 10 | 5  | 20.57  | 8.57  | 9300000  | 6100000  | 7200000  | 28.00432 |
| P61205  | ADP-ribosylation factor 3 OS=Mus musculus GN=Arf3 PE=2 SV=2                                       | 18.23204 | 3  | 5  | 2  | 20.588 | 7.43  | 17000000 | 5900000  |          | 14.95505 |
| Q3UHX2  | 28 kDa heat- and acid-stable phosphoprotein OS=Mus musculus GN=Pdap1 PE=1 SV=1                    | 32.59669 | 5  | 17 | 5  | 20.593 | 7.39  | 14000000 | 12000000 | 12000000 | 63.74282 |
| Q9Z0S9  | Prenylated Rab acceptor protein 1 OS=Mus musculus GN=Rabac1 PE=1 SV=1                             | 8.108108 | 1  | 1  | 1  | 20.606 | 7.9   | 720000   |          |          | 2.304029 |
| Q9R0P6  | Signal peptidase complex catalytic subunit SEC11A OS=Mus musculus GN=Sec11a PE=1 SV=1             | 9.497207 | 2  | 4  | 2  | 20.613 | 9.33  | 2300000  | 1500000  | 2000000  | 8.742439 |
| P62717  | 60S ribosomal protein L18a OS=Mus musculus GN=Rpl18a PE=1 SV=1                                    | 28.40909 | 5  | 9  | 5  | 20.719 | 10.71 | 21000000 | 14000000 | 11000000 | 30.21056 |
| Q8BU31  | Ras-related protein Rap-2c OS=Mus musculus GN=Rap2c PE=1 SV=1                                     | 14.20765 | 2  | 2  | 1  | 20.731 | 4.94  |          | 480000   |          | 5.023464 |
| Q9CQ80  | Vacuolar protein-sorting-associated protein 25 OS=Mus musculus GN=Vps25 PE=1 SV=1                 | 4.545455 | 1  | 1  | 1  | 20.735 | 6.34  |          | 920000   |          | 2.210815 |
| Q9QXT0  | Protein canopy homolog 2 OS=Mus musculus GN=Cnpy2 PE=1 SV=1                                       | 15.38462 | 2  | 6  | 2  | 20.754 | 5.07  | 1300000  | 710000   | 1300000  | 16.7466  |
| P29391  | Ferritin light chain 1 OS=Mus musculus GN=Ftl1 PE=1 SV=2                                          | 28.4153  | 3  | 6  | 3  | 20.789 | 6     | 3000000  | 3300000  | 1800000  | 21.4364  |
| Q99J16  | Ras-related protein Rap-1b OS=Mus musculus GN=Rap1b PE=1 SV=2                                     | 33.15217 | 8  | 26 | 3  | 20.812 | 5.78  | 15000000 | 19000000 | 4600000  | 73.27667 |
| P55821  | Stathmin-2 OS=Mus musculus GN=Stmn2 PE=1 SV=1                                                     | 5.586592 | 1  | 3  | 1  | 20.815 | 8.32  | 9900000  | 8300000  | 8200000  | 7.586367 |
| P70296  | Phosphatidylethanolamine-binding protein 1 OS=Mus musculus GN=Pebp1 PE=1 SV=3                     | 6.951872 | 1  | 3  | 1  | 20.817 | 5.4   | 2500000  | 3000000  | 2300000  | 10.32768 |
| P23198  | Chromobox protein homolog 3 OS=Mus musculus GN=Cbx3 PE=1 SV=2                                     | 36.61202 | 7  | 18 | 5  | 20.842 | 5.22  | 56000000 | 53000000 | 55000000 | 68.61187 |
| P10922  | Histone H1.0 OS=Mus musculus GN=H1f0 PE=2 SV=4                                                    | 16.49485 | 3  | 11 | 3  | 20.848 | 10.9  | 19000000 | 19000000 | 15000000 | 32.79523 |
| Q8C8T8  | Pre-rRNA-processing protein TSR2 homolog OS=Mus musculus GN=Tsr2 PE=1 SV=1                        | 6.806283 | 1  | 1  | 1  | 20.878 | 4.23  | 780000   |          |          | 3.319439 |
| P61082  | NEDD8-conjugating enzyme Ubc12 OS=Mus musculus GN=Ube2m PE=1 SV=1                                 | 4.918033 | 1  | 3  | 1  | 20.887 | 7.69  | 2600000  | 3300000  | 2800000  | 6.486334 |
| P97314  | Cysteine and glycine-rich protein 2 OS=Mus musculus GN=Csrp2 PE=1 SV=3                            | 7.772021 | 1  | 1  | 1  | 20.912 | 8.62  | 660000   |          |          | 1.946186 |
| P62835  | Ras-related protein Rap-1A OS=Mus musculus GN=Rap1a PE=1 SV=1                                     |          | 25 | 6  | 21 | 20.974 | 6.67  | 16000000 | 13000000 | 12000000 | 57.33875 |
| Q9DCS9  | NADH dehydrogenase [ubiquinone] 1 beta subcomplex subunit 10 OS=Mus musculus GN=Ndufb10 PE=1 SV=3 | 24.43182 | 3  | 6  | 3  | 21.01  | 8.03  | 8900000  | 3300000  | 2400000  | 20.62638 |
| Q60870  | Receptor expression-enhancing protein 5 OS=Mus musculus GN=Reep5 PE=1 SV=1                        | 5.405405 | 1  | 4  | 1  | 21.037 | 8.38  | 6600000  | 7300000  | 4400000  | 14.55217 |
| Q9DCF9  | Translocon-associated protein subunit gamma OS=Mus musculus GN=Ssr3 PE=1 SV=1                     | 7.567568 | 1  | 5  | 1  | 21.051 | 9.61  | 12000000 | 1900000  | 11000000 | 18.63968 |
| P09528  | Ferritin heavy chain OS=Mus musculus GN=Fth1 PE=1 SV=2                                            | 32.41758 | 5  | 19 | 5  | 21.053 | 5.88  | 6400000  | 8100000  | 2900000  | 55.89722 |
| O09114  | Prostaglandin-H2 D-isomerase OS=Mus musculus GN=Ptgds PE=1 SV=1                                   | 8.994709 | 1  | 1  | 1  | 21.053 | 8.25  |          |          | 550000   | 2.58893  |
| Q9CR27  | WASH complex subunit CCDC53 OS=Mus musculus GN=Ccdc53 PE=1 SV=1                                   | 4.123711 | 1  | 1  | 1  | 21.08  | 4.46  |          |          | 210000   | 1.945026 |
| Q9CPT5  | Nucleolar protein 16 OS=Mus musculus GN=Nop16 PE=1 SV=1                                           | 4.494382 | 1  | 1  | 1  | 21.126 | 9.91  | 1200000  |          |          | 1.989397 |
| Q921L3  | Calcium load-activated calcium channel OS=Mus musculus GN=Tmco1 PE=1 SV=1                         | 7.446809 | 1  | 2  | 1  | 21.161 | 9.74  | 2100000  | 740000   |          | 5.210736 |
| Q91XE8  | Transmembrane protein 205 OS=Mus musculus GN=Tmem205 PE=1 SV=1                                    | 8.994709 | 1  | 1  | 1  | 21.166 | 9.42  |          | 1600000  |          | 3.167513 |
| P08556  | GTPase NRas OS=Mus musculus GN=Nras PE=1 SV=1                                                     | 19.57672 | 3  | 9  | 2  | 21.186 | 5.17  | 3900000  | 2800000  | 2200000  | 26.84037 |
| P60766  | Cell division control protein 42 homolog OS=Mus musculus GN=Cdc42 PE=1 SV=2                       | 26.17801 | 4  | 11 | 3  | 21.245 | 6.55  | 1500000  | 4100000  | 3000000  | 31.68808 |
| Q8K2H6  | Anaphase-promoting complex subunit 10 OS=Mus musculus GN=Anapc10 PE=1 SV=1                        | 6.486486 | 1  | 1  | 1  | 21.253 | 9.06  |          |          | 150000   | 1.977301 |
| P84096  | Rho-related GTP-binding protein RhoG OS=Mus musculus GN=Rhog PE=1 SV=1                            | 45.54974 | 7  | 16 | 6  | 21.295 | 8.12  | 7000000  | 8200000  | 5200000  | 54.32089 |
| Q8BK08  | Transmembrane protein 11, mitochondrial OS=Mus musculus GN=Tmem11 PE=1 SV=1                       | 4.736842 | 1  | 2  | 1  | 21.298 | 7.36  | 3400000  | 2300000  |          | 4.328761 |
| P52482  | Ubiquitin-conjugating enzyme E2 E1 OS=Mus musculus GN=Ube2e1 PE=1 SV=1                            | 9.326425 | 1  | 1  | 1  | 21.32  | 8.53  | 950000   |          |          | 2.960333 |
| P60764  | Ras-related C3 botulinum toxin substrate 3 OS=Mus musculus GN=Rac3 PE=1 SV=1                      | 9.895833 | 2  | 6  | 1  | 21.365 | 8.15  | 14000000 | 9600000  | 10000000 | 16.49901 |
| Q8VEH3  | ADP-ribosylation factor-like protein 8A OS=Mus musculus GN=Arl8a PE=1 SV=1                        | 18.27957 | 3  | 10 | 2  | 21.376 | 7.77  | 5700000  | 4900000  | 3900000  | 29.21405 |
| P83917  | Chromobox protein homolog 1 OS=Mus musculus GN=Cbx1 PE=1 SV=1                                     | 30.81081 | 5  | 18 | 4  | 21.405 | 4.93  | 10000000 | 11000000 | 10000000 | 62.92983 |
| Q9CPR4  | 60S ribosomal protein L17 OS=Mus musculus GN=Rpl17 PE=1 SV=3                                      | 22.82609 | 4  | 14 | 4  | 21.409 | 10.18 | 26000000 | 37000000 | 39000000 | 35.36381 |
| Q9D291  | Desumoylating isopeptidase 2 OS=Mus musculus GN=Desi2 PE=1 SV=1                                   | 8.247423 | 1  | 1  | 1  | 21.42  | 4.92  |          |          |          | 2.135327 |
| Q35988  | Syndecan-4 OS=Mus musculus GN=Sdc4 PE=1 SV=1                                                      | 12.12121 | 2  | 3  | 2  | 21.469 | 4.41  | 3200000  | 1900000  |          | 9.548775 |
| Q9BCZ4  | Selenoprotein S OS=Mus musculus GN=Vimp PE=1 SV=3                                                 | 11.57895 | 2  | 4  | 2  | 21.497 | 9.39  | 680000   | 730000   | 910000   | 9.702255 |
| P51910  | Apolipoprotein D OS=Mus musculus GN=Apod PE=1 SV=1                                                | 6.878307 | 1  | 5  | 1  | 21.516 | 4.91  | 4300000  | 11000000 | 10000000 | 15.41338 |
| Q9CQW2  | ADP-ribosylation factor-like protein 8B OS=Mus musculus GN=Arl8b PE=1 SV=1                        | 9.677419 | 2  | 6  | 1  | 21.525 | 8.43  | 18000000 | 13000000 | 12000000 | 14.37278 |
| Q8R5J9  | PRA1 family protein 3 OS=Mus musculus GN=Arl6ip5 PE=1 SV=2                                        | 5.851064 | 1  | 3  | 1  | 21.543 | 9.61  | 7900000  | 6000000  | 5700000  | 8.435929 |
| P35980  | 60S ribosomal protein L18 OS=Mus musculus GN=Rpl18 PE=1 SV=3                                      | 33.51064 | 6  | 18 | 6  | 21.631 | 11.78 | 63000000 | 54000000 | 57000000 | 55.49859 |

|        |                                                                                                                |           |    |    |    |        |       |          |          |          |          |
|--------|----------------------------------------------------------------------------------------------------------------|-----------|----|----|----|--------|-------|----------|----------|----------|----------|
| Q2VPO9 | Chromatin modification-related protein MEAF6 OS=Mus musculus GN=Meaf6 PE=1 SV=1                                | 9.947644  | 2  | 3  | 2  | 21.636 | 9.32  | 500000   | 1900000  | 790000   | 7.156549 |
| P32883 | GTPase KRas OS=Mus musculus GN=Kras PE=1 SV=1                                                                  | 11.111111 | 2  | 4  | 1  | 21.642 | 6.77  | 2100000  |          |          | 9.864336 |
| O55022 | Membrane-associated progesterone receptor component 1 OS=Mus musculus GN=Pgrmc1 PE=1 SV=4                      | 27.69231  | 5  | 15 | 4  | 21.681 | 4.7   | 4600000  | 3700000  | 2400000  | 46.13694 |
| Q9DB15 | 39S ribosomal protein L12, mitochondrial OS=Mus musculus GN=Mrpl12 PE=1 SV=2                                   | 6.965174  | 1  | 2  | 1  | 21.695 | 9.29  |          |          |          | 7.444701 |
| Q9CQH3 | NADH dehydrogenase [ubiquinone] 1 beta subcomplex subunit 5, mitochondrial OS=Mus musculus GN=Ndufb5 PE=1 SV=1 | 21.16402  | 4  | 10 | 4  | 21.696 | 9.41  | 6600000  | 6100000  | 3500000  | 26.50757 |
| Q9DCR2 | AP-3 complex subunit sigma-1 OS=Mus musculus GN=Ap3s1 PE=1 SV=2                                                | 13.4715   | 2  | 4  | 2  | 21.718 | 5.39  |          | 1400000  | 1200000  | 10.84594 |
| Q9DCI9 | 39S ribosomal protein L32, mitochondrial OS=Mus musculus GN=Mrpl32 PE=1 SV=1                                   | 6.417112  | 1  | 1  | 1  | 21.719 | 9.7   |          | 1600000  |          | 2.271377 |
| Q921Y2 | U3 small nucleolar ribonucleoprotein protein IMP3 OS=Mus musculus GN=Imp3 PE=2 SV=1                            | 8.152174  | 1  | 1  | 1  | 21.763 | 9.5   | 1500000  |          |          | 2.432849 |
| Q61171 | Peroxiredoxin-2 OS=Mus musculus GN=Prdx2 PE=1 SV=3                                                             | 4.040404  | 1  | 1  | 1  | 21.765 | 5.41  |          |          |          | 1.841062 |
| Q9QU0  | Transforming protein RhoA OS=Mus musculus GN=Rhoa PE=1 SV=1                                                    | 29.53368  | 6  | 10 | 6  | 21.768 | 6.1   | 14000000 | 1600000  | 9800000  | 26.86607 |
| P43275 | Histone H1.1 OS=Mus musculus GN=Hist1h1a PE=1 SV=2                                                             | 10.32864  | 3  | 6  | 1  | 21.772 | 10.93 |          | 27000000 |          | 16.90028 |
| P35285 | Ras-related protein Rab-22A OS=Mus musculus GN=Rab22a PE=1 SV=2                                                | 5.670103  | 1  | 1  | 1  | 21.788 | 8.15  |          | 740000   |          | 2.101998 |
| P12815 | Programmed cell death protein 6 OS=Mus musculus GN=Pdc6 PE=1 SV=2                                              | 5.759162  | 1  | 2  | 1  | 21.854 | 5.4   |          |          |          | 5.122939 |
| Q9D6J5 | NADH dehydrogenase [ubiquinone] 1 beta subcomplex subunit 8, mitochondrial OS=Mus musculus GN=Ndufb8 PE=1 SV=1 | 17.74194  | 3  | 6  | 3  | 21.862 | 6.64  | 3900000  | 3700000  | 460000   | 14.00245 |
| P51410 | 60S ribosomal protein L9 OS=Mus musculus GN=Rpl9 PE=2 SV=2                                                     | 11.45833  | 2  | 5  | 2  | 21.868 | 9.95  | 43000000 | 23000000 | 43000000 | 13.50202 |
| P99029 | Peroxiredoxin-5, mitochondrial OS=Mus musculus GN=Prdx5 PE=1 SV=2                                              | 11.90476  | 2  | 5  | 2  | 21.884 | 8.85  | 4200000  | 3400000  | 5900000  | 14.10474 |
| P43274 | Histone H1.4 OS=Mus musculus GN=Hist1h1e PE=1 SV=2                                                             | 15.52511  | 4  | 16 | 1  | 21.964 | 11.11 | 1.3E+08  | 1.2E+08  | 1.1E+08  | 42.91799 |
| Q9WTO8 | Mitochondrial import inner membrane translocase subunit Tim23 OS=Mus musculus GN=Timm23 PE=1 SV=1              | 8.133971  | 1  | 3  | 1  | 21.964 | 9.13  | 1000000  | 810000   | 820000   | 11.10538 |
| Q9CQJ8 | NADH dehydrogenase [ubiquinone] 1 beta subcomplex subunit 9 OS=Mus musculus GN=Ndufb9 PE=1 SV=3                | 39.6648   | 4  | 7  | 4  | 21.97  | 7.8   | 2400000  | 1700000  | 2300000  | 22.56844 |
| Q64152 | Transcription factor BTF3 OS=Mus musculus GN=Btf3 PE=1 SV=3                                                    | 12.2549   | 1  | 6  | 1  | 22.017 | 9.52  | 7000000  | 7600000  | 5300000  | 30.32412 |
| Q08024 | Core-binding factor subunit beta OS=Mus musculus GN=Cbfb PE=1 SV=1                                             | 17.64706  | 2  | 4  | 2  | 22.017 | 5.77  | 1000000  | 1200000  | 1200000  | 15.78013 |
| Q91XV3 | Brain acid soluble protein 1 OS=Mus musculus GN=Basp1 PE=1 SV=3                                                | 17.68142  | 11 | 57 | 11 | 22.074 | 4.51  | 1.1E+08  | 7100000  | 6400000  | 225.0312 |
| P43277 | Histone H1.3 OS=Mus musculus GN=Hist1h1d PE=1 SV=2                                                             | 15.38462  | 4  | 17 | 1  | 22.086 | 11.03 | 1.7E+08  | 1.8E+08  | 1.5E+08  | 44.33175 |
| P60904 | Dnaj homolog subfamily C member 5 OS=Mus musculus GN=Dnajc5 PE=1 SV=1                                          | 24.24242  | 2  | 7  | 2  | 22.086 | 5.07  | 13000000 | 4800000  | 6000000  | 21.10595 |
| Q60771 | Claudin-11 OS=Mus musculus GN=Cldn11 PE=1 SV=1                                                                 | 6.763285  | 1  | 2  | 1  | 22.099 | 7.91  | 9900000  | 4300000  |          | 5.365395 |
| P62082 | 40S ribosomal protein S7 OS=Mus musculus GN=Rps7 PE=2 SV=1                                                     | 12.8866   | 3  | 7  | 3  | 22.113 | 10.1  | 19000000 | 21000000 | 16000000 | 15.94266 |
| Q9D1M7 | Peptidyl-prolyl cis-trans isomerase FKBP11 OS=Mus musculus GN=FKBP11 PE=1 SV=1                                 | 4.975124  | 1  | 3  | 1  | 22.123 | 9.36  | 3000000  | 2300000  | 2400000  | 7.640538 |
| P62761 | Visinin-like protein 1 OS=Mus musculus GN=Vsnl1 PE=1 SV=2                                                      | 26.70157  | 5  | 20 | 4  | 22.128 | 5.15  | 13000000 | 10000000 | 6200000  | 49.47676 |
| Q9DBP5 | UMP-CMP kinase OS=Mus musculus GN=Cmpk1 PE=1 SV=1                                                              | 5.612245  | 1  | 2  | 1  | 22.151 | 5.83  | 1500000  | 1100000  |          | 4.432056 |
| Q9CQJ6 | Density-regulated protein OS=Mus musculus GN=Denr PE=1 SV=1                                                    | 21.21212  | 3  | 7  | 3  | 22.152 | 5.3   | 3200000  | 3700000  | 2000000  | 24.4185  |
| P35700 | Peroxiredoxin-1 OS=Mus musculus GN=Prdx1 PE=1 SV=1                                                             | 55.77889  | 10 | 30 | 8  | 22.162 | 8.12  | 16000000 | 16000000 | 13000000 | 77.1825  |
| Q61686 | Chromobox protein homolog 5 OS=Mus musculus GN=Cbx5 PE=1 SV=1                                                  | 43.4555   | 8  | 28 | 7  | 22.172 | 5.86  | 23000000 | 25000000 | 26000000 | 83.12839 |
| Q9D1G1 | Ras-related protein Rab-1B OS=Mus musculus GN=Rab1b PE=1 SV=1                                                  | 30.34826  | 5  | 14 | 2  | 22.173 | 5.73  | 4400000  | 7800000  | 3700000  | 38.71562 |
| Q8BGZ1 | Hippocalcin-like protein 4 OS=Mus musculus GN=Hpcal4 PE=1 SV=3                                                 | 15.70681  | 3  | 7  | 2  | 22.201 | 4.89  | 6800000  | 3200000  | 4700000  | 19.00417 |
| Q9D0B6 | Protein PBDC1 OS=Mus musculus GN=Pbdc1 PE=1 SV=1                                                               | 13.63636  | 2  | 3  | 2  | 22.21  | 4.55  | 1200000  |          | 960000   | 9.097236 |
| Q91X97 | Neurocalcin-delta OS=Mus musculus GN=Ncald PE=1 SV=4                                                           | 22.27979  | 4  | 8  | 2  | 22.231 | 5.35  | 2500000  |          |          | 20.33552 |
| Q9D6N5 | Dr1-associated corepressor OS=Mus musculus GN=Drap1 PE=1 SV=3                                                  | 15.60976  | 2  | 6  | 2  | 22.264 | 5.26  | 2800000  | 3100000  | 2800000  | 18.68966 |
| P11352 | Glutathione peroxidase 1 OS=Mus musculus GN=Gpx1 PE=1 SV=2                                                     | 13.43284  | 2  | 8  | 2  | 22.316 | 7.21  | 5100000  | 4900000  | 2900000  | 22.53582 |
| P62748 | Hippocalcin-like protein 1 OS=Mus musculus GN=Hpcal1 PE=1 SV=2                                                 | 9.326425  | 2  | 6  | 1  | 22.324 | 5.5   | 980000   | 660000   | 580000   | 13.09776 |
| P36536 | GTP-binding protein SAR1a OS=Mus musculus GN=Sar1a PE=1 SV=1                                                   | 9.59596   | 2  | 6  | 2  | 22.357 | 6.93  | 2200000  | 1800000  | 1500000  | 13.54125 |
| Q9WVA4 | Transgelin-2 OS=Mus musculus GN=Tagln2 PE=1 SV=4                                                               | 24.62312  | 4  | 8  | 4  | 22.381 | 8.24  | 2100000  | 4000000  | 1500000  | 23.67449 |
| P61087 | Ubiquitin-conjugating enzyme E2 K OS=Mus musculus GN=Ube2k PE=1 SV=3                                           | 6         | 1  | 3  | 1  | 22.393 | 5.44  | 970000   | 1100000  | 820000   | 8.609021 |
| P09542 | Myosin light chain 3 OS=Mus musculus GN=Myl3 PE=1 SV=4                                                         | 9.803922  | 2  | 7  | 1  | 22.407 | 5.1   | 8900000  | 12000000 | 5500000  | 19.80314 |
| P84075 | Neuron-specific calcium-binding protein hippocalcin OS=Mus musculus GN=Hpca PE=1 SV=2                          | 16.06218  | 3  | 8  | 1  | 22.413 | 4.97  | 2000000  | 1500000  |          | 18.46214 |
| Q9JMG7 | Hepatoma-derived growth factor-related protein 3 OS=Mus musculus GN=Hdgrp3 PE=1 SV=2                           | 7.920792  | 1  | 3  | 1  | 22.417 | 8.4   | 4300000  | 3100000  | 2500000  | 9.495946 |
| P61759 | Prefoldin subunit 3 OS=Mus musculus GN=Vbp1 PE=1 SV=2                                                          | 9.693878  | 2  | 3  | 2  | 22.421 | 6.28  |          | 2500000  |          | 6.031665 |
| Q8ROA5 | Transcription elongation factor A protein-like 3 OS=Mus musculus GN=Tceal3 PE=1 SV=2                           | 11        | 1  | 3  | 1  | 22.455 | 5.44  | 1100000  | 1200000  | 460000   | 9.264688 |
| Q9R1Q8 | Transgelin-3 OS=Mus musculus GN=Tagln3 PE=1 SV=1                                                               | 13.06533  | 3  | 7  | 3  | 22.456 | 7.33  | 1300000  | 860000   | 1100000  | 15.88944 |
| P37217 | Early activation antigen CD69 OS=Mus musculus GN=Cd69 PE=2 SV=1                                                | 8.040201  | 1  | 1  | 1  | 22.503 | 7.02  |          | 940000   |          | 3.348228 |
| P61027 | Ras-related protein Rab-10 OS=Mus musculus GN=Rab10 PE=1 SV=1                                                  | 37        | 7  | 20 | 5  | 22.527 | 8.38  | 11000000 | 10000000 | 8700000  | 55.46659 |
| P43276 | Histone H1.5 OS=Mus musculus GN=Hist1h1b PE=1 SV=2                                                             | 15.24664  | 4  | 14 | 4  | 22.562 | 10.92 | 36000000 | 39000000 | 37000000 | 33.79545 |
| Q6ZWN5 | 40S ribosomal protein S9 OS=Mus musculus GN=Rps9 PE=1 SV=3                                                     | 34.02062  | 8  | 23 | 8  | 22.578 | 10.65 | 56000000 | 52000000 | 57000000 | 55.32329 |
| Q9DCZ4 | MICOS complex subunit Mic26 OS=Mus musculus GN=Apo0 PE=1 SV=2                                                  | 13.13131  | 2  | 2  | 2  | 22.59  | 9.25  | 4400000  | 7000000  |          | 6.168548 |

|        |                                                                                           |          |    |    |    |        |       |          |          |          |          |
|--------|-------------------------------------------------------------------------------------------|----------|----|----|----|--------|-------|----------|----------|----------|----------|
| P62821 | Ras-related protein Rab-1A OS=Mus musculus GN=Rab1A PE=1 SV=3                             | 36.58537 | 6  | 23 | 3  | 22.663 | 6.21  | 7400000  | 6000000  | 5400000  | 73.06267 |
| Q9C088 | Tetraspanin-31 OS=Mus musculus GN=Tspan31 PE=1 SV=1                                       | 5.714286 | 1  | 1  | 1  | 22.679 | 8.44  |          | 1300000  |          | 2.238981 |
| Q9R0Q3 | Transmembrane emp24 domain-containing protein 2 OS=Mus musculus GN=Tmed2 PE=1 SV=1        | 10.44776 | 2  | 8  | 2  | 22.69  | 5.17  | 7600000  | 6700000  | 16000000 | 19.34628 |
| Q673H1 | Tumor suppressor candidate gene 1 protein homolog OS=Mus musculus GN=Tusc1 PE=1 SV=1      | 7.804878 | 1  | 1  | 1  | 22.699 | 11.09 |          |          | 1300000  | 2.336337 |
| Q9DCT8 | Cysteine-rich protein 2 OS=Mus musculus GN=Crip2 PE=1 SV=1                                | 7.692308 | 1  | 2  | 1  | 22.712 | 8.63  | 360000   | 310000   |          | 5.049096 |
| P63139 | Nuclear transcription factor Y subunit beta OS=Mus musculus GN=Nfyb PE=1 SV=1             | 6.280193 | 1  | 2  | 1  | 22.773 | 4.59  |          | 340000   | 560000   | 5.206454 |
| P30412 | Peptidyl-prolyl cis-trans isomerase C OS=Mus musculus GN=Ppic PE=1 SV=1                   | 6.132075 | 1  | 3  | 1  | 22.78  | 7.5   | 870000   | 820000   | 650000   | 7.630697 |
| Q61599 | Rho GDP-dissociation inhibitor 2 OS=Mus musculus GN=Arhgdib PE=1 SV=3                     | 8        | 1  | 2  | 1  | 22.836 | 5.11  | 3200000  | 2800000  |          | 6.983486 |
| P11672 | Neutrophil gelatinase-associated lipocalin OS=Mus musculus GN=Lcn2 PE=1 SV=1              | 3.5      | 1  | 1  | 1  | 22.861 | 8.81  |          |          | 3300000  | 2.345358 |
| P97461 | 40S ribosomal protein S5 OS=Mus musculus GN=Rps5 PE=1 SV=3                                | 9.313725 | 3  | 8  | 3  | 22.875 | 9.72  | 18000000 | 11000000 | 8600000  | 20.55226 |
| Q9R1P3 | Proteasome subunit beta type-2 OS=Mus musculus GN=Psmb2 PE=1 SV=1                         | 11.44279 | 2  | 5  | 2  | 22.892 | 7.02  | 2400000  | 2200000  | 1200000  | 14.83942 |
| Q9R0M6 | Ras-related protein Rab-9A OS=Mus musculus GN=Rab9a PE=1 SV=1                             | 6.467662 | 1  | 2  | 1  | 22.895 | 5.66  | 660000   | 580000   |          | 5.311714 |
| Q921Z5 | Tumor necrosis factor alpha-induced protein 8 OS=Mus musculus GN=Tnfaip8 PE=1 SV=1        | 5.050505 | 1  | 1  | 1  | 22.946 | 7.93  |          | 890000   |          | 2.751731 |
| Q9R1P1 | Proteasome subunit beta type-3 OS=Mus musculus GN=Psmb3 PE=1 SV=1                         | 4.878049 | 1  | 1  | 1  | 22.949 | 6.55  | 1100000  |          |          | 2.440578 |
| Q9CQU3 | Protein RER1 OS=Mus musculus GN=Rer1 PE=1 SV=1                                            | 9.183673 | 1  | 6  | 1  | 22.973 | 9.51  | 6900000  | 6700000  | 6900000  | 20.42805 |
| O54879 | High mobility group protein B3 OS=Mus musculus GN=Hmgb3 PE=1 SV=3                         | 17.5     | 2  | 6  | 2  | 22.995 | 8.37  | 4400000  | 4100000  | 6700000  | 20.3393  |
| Q6PHN9 | Ras-related protein Rab-35 OS=Mus musculus GN=Rab35 PE=1 SV=1                             | 15.42289 | 3  | 8  | 1  | 23.011 | 8.29  | 16000000 |          | 12000000 | 20.41235 |
| P35293 | Ras-related protein Rab-18 OS=Mus musculus GN=Rab18 PE=1 SV=2                             | 32.03883 | 5  | 11 | 5  | 23.021 | 5.36  | 8700000  | 7200000  | 5600000  | 35.59102 |
| P52651 | Homeobox protein Rhox5 OS=Mus musculus GN=Rhox5 PE=2 SV=1                                 | 12.85714 | 1  | 1  | 1  | 23.031 | 6.25  | 510000   |          |          | 4.884413 |
| Q9JM14 | 5'(3')-deoxyribonucleotidase, cytosolic type OS=Mus musculus GN=Nt5c PE=1 SV=1            | 6.5      | 1  | 1  | 1  | 23.062 | 5.49  |          | 530000   |          | 2.417355 |
| O09044 | Synaptosomal-associated protein 23 OS=Mus musculus GN=Snap23 PE=1 SV=1                    | 12.85714 | 2  | 7  | 1  | 23.246 | 4.98  | 2600000  | 3500000  |          | 20.94213 |
| O08734 | Bcl-2 homologous antagonist/killer OS=Mus musculus GN=Bak1 PE=1 SV=3                      | 11.00478 | 1  | 2  | 1  | 23.28  | 6.18  |          | 1500000  | 1300000  | 5.958138 |
| P60879 | Synaptosomal-associated protein 25 OS=Mus musculus GN=Snap25 PE=1 SV=1                    | 30.09709 | 5  | 20 | 4  | 23.3   | 4.77  | 16000000 | 10000000 | 6500000  | 65.5112  |
| Q80UU9 | Membrane-associated progesterone receptor component 2 OS=Mus musculus GN=Pgrmc2 PE=1 SV=2 | 38.24885 | 5  | 15 | 4  | 23.32  | 5.15  | 3400000  | 4500000  | 3900000  | 45.40846 |
| Q9CTH6 | rRNA-processing protein FCF1 homolog OS=Mus musculus GN=Fcfc1 PE=2 SV=2                   | 10.10101 | 2  | 2  | 2  | 23.325 | 9.67  |          |          | 540000   | 3.958102 |
| Q9JIW9 | Ras-related protein Ral-B OS=Mus musculus GN=Ralb PE=1 SV=1                               | 4.368932 | 1  | 2  | 1  | 23.335 | 6.62  | 370000   | 410000   |          | 4.0597   |
| Q9DB20 | ATP synthase subunit O, mitochondrial OS=Mus musculus GN=Atp5o PE=1 SV=1                  | 20.65728 | 3  | 5  | 3  | 23.349 | 9.99  | 2500000  | 1500000  | 1100000  | 13.17522 |
| Q9DD18 | D-tyrosyl-tRNA(Tyr) deacylase 1 OS=Mus musculus GN=Dtd1 PE=1 SV=2                         | 7.655502 | 1  | 2  | 1  | 23.37  | 7.87  | 1500000  |          | 1100000  | 7.712435 |
| P28076 | Proteasome subunit beta type-9 OS=Mus musculus GN=Psmb9 PE=1 SV=1                         | 4.109589 | 1  | 2  | 1  | 23.382 | 5.22  | 6000000  | 5500000  |          | 4.086198 |
| P62071 | Ras-related protein R-Ras2 OS=Mus musculus GN=Rras2 PE=1 SV=1                             | 20.09804 | 3  | 9  | 3  | 23.385 | 6.01  | 2000000  | 1900000  | 2200000  | 26.08617 |
| Q99PT1 | Rho GDP-dissociation inhibitor 1 OS=Mus musculus GN=Arhgdia PE=1 SV=3                     | 25.4902  | 4  | 5  | 4  | 23.393 | 5.2   | 820000   | 4400000  | 3700000  | 12.31988 |
| P35278 | Ras-related protein Rab-5C OS=Mus musculus GN=Rab5c PE=1 SV=2                             | 21.2963  | 4  | 12 | 2  | 23.398 | 8.41  | 16000000 | 20000000 | 20000000 | 33.94156 |
| P0C0A3 | Charged multivesicular body protein 6 OS=Mus musculus GN=Chmp6 PE=1 SV=2                  | 19.5     | 3  | 4  | 3  | 23.401 | 5.44  | 1100000  | 1700000  | 2600000  | 12.39675 |
| P19253 | 60S ribosomal protein L13a OS=Mus musculus GN=Rpl13a PE=1 SV=4                            | 20.68966 | 4  | 20 | 4  | 23.449 | 11.02 | 48000000 | 37000000 | 34000000 | 50.14922 |
| P84099 | 60S ribosomal protein L19 OS=Mus musculus GN=Rpl19 PE=1 SV=1                              | 13.26531 | 2  | 8  | 2  | 23.451 | 11.47 | 71000000 | 70000000 | 68000000 | 28.03722 |
| Q9CY66 | H/ACA ribonucleoprotein complex subunit 1 OS=Mus musculus GN=Gar1 PE=1 SV=1               | 3.896104 | 1  | 2  | 1  | 23.46  | 11.02 |          | 1000000  | 1000000  | 4.140521 |
| P51150 | Ras-related protein Rab-7a OS=Mus musculus GN=Rab7a PE=1 SV=2                             | 47.82609 | 8  | 27 | 8  | 23.475 | 6.7   | 16000000 | 14000000 | 13000000 | 89.88087 |
| P53994 | Ras-related protein Rab-2A OS=Mus musculus GN=Rab2a PE=1 SV=1                             | 41.98113 | 7  | 15 | 7  | 23.533 | 6.54  | 16000000 | 19000000 | 9000000  | 46.06519 |
| P63321 | Ras-related protein Ral-A OS=Mus musculus GN=Rala PE=1 SV=1                               | 13.1068  | 2  | 4  | 2  | 23.538 | 7.11  | 13000000 | 8900000  | 6500000  | 14.80858 |
| Q9CR57 | 60S ribosomal protein L14 OS=Mus musculus GN=Rpl14 PE=1 SV=3                              | 19.81567 | 4  | 14 | 4  | 23.549 | 11.02 | 20000000 | 20000000 | 19000000 | 36.7923  |
| Q7TQD2 | Tubulin polymerization-promoting protein OS=Mus musculus GN=Tppp PE=1 SV=1                | 12.38532 | 2  | 3  | 2  | 23.56  | 9.42  | 2500000  | 3200000  |          | 8.535874 |
| Q8BR63 | Protein FAM177A1 OS=Mus musculus GN=Fam177a1 PE=1 SV=1                                    | 12.07729 | 2  | 2  | 2  | 23.563 | 4.59  | 1600000  |          |          | 4.208966 |
| P35279 | Ras-related protein Rab-6A OS=Mus musculus GN=Rab6a PE=1 SV=4                             | 23.07692 | 4  | 10 | 3  | 23.575 | 5.54  | 4000000  | 4300000  | 3800000  | 27.10963 |
| P34022 | Ran-specific GTPase-activating protein OS=Mus musculus GN=Ranbp1 PE=1 SV=2                | 27.58621 | 3  | 10 | 3  | 23.582 | 5.22  | 10000000 | 10000000 | 9500000  | 31.88674 |
| Q9CQD1 | Ras-related protein Rab-5A OS=Mus musculus GN=Rab5a PE=1 SV=1                             | 21.39535 | 4  | 10 | 2  | 23.584 | 8.15  | 4200000  | 8200000  |          | 27.63569 |
| P61028 | Ras-related protein Rab-8B OS=Mus musculus GN=Rab8b PE=1 SV=1                             | 23.18841 | 4  | 10 | 2  | 23.588 | 9.07  | 2000000  | 1400000  | 1100000  | 28.90488 |
| P19157 | Glutathione S-transferase P 1 OS=Mus musculus GN=Gstp1 PE=1 SV=2                          | 20.47619 | 3  | 6  | 3  | 23.594 | 7.87  | 2800000  | 3300000  | 4800000  | 21.09103 |
| Q9CPW7 | Zinc finger matrin-type protein 2 OS=Mus musculus GN=Zmat2 PE=2 SV=1                      | 6.030151 | 1  | 1  | 1  | 23.597 | 9.01  |          | 1000000  |          | 2.371313 |
| P06837 | Neuromodulin OS=Mus musculus GN=Gap43 PE=1 SV=1                                           | 39.64758 | 6  | 17 | 6  | 23.618 | 4.73  | 18000000 | 8500000  | 6600000  | 55.4507  |
| Q91V08 | C-type lectin domain family 2 member D OS=Mus musculus GN=Clec2d PE=1 SV=1                | 5.797101 | 1  | 1  | 1  | 23.631 | 7.62  | 730000   |          |          | 2.463006 |
| P55258 | Ras-related protein Rab-8A OS=Mus musculus GN=Rab8a PE=1 SV=2                             | 17.3913  | 3  | 7  | 1  | 23.653 | 9.07  | 410000   |          |          | 18.6091  |
| P61021 | Ras-related protein Rab-5B OS=Mus musculus GN=Rab5b PE=1 SV=1                             | 15.81395 | 3  | 7  | 1  | 23.692 | 8.13  |          | 2700000  |          | 18.99394 |
| P24369 | Peptidyl-prolyl cis-trans isomerase B OS=Mus musculus GN=Ppib PE=1 SV=2                   | 42.12963 | 10 | 31 | 10 | 23.699 | 9.55  | 39000000 | 31000000 | 25000000 | 87.11706 |



|           |                                                                                                          |          |    |    |    |        |       |          |          |          |          |
|-----------|----------------------------------------------------------------------------------------------------------|----------|----|----|----|--------|-------|----------|----------|----------|----------|
| Q7TMY4    | THO complex subunit 7 homolog OS=Mus musculus GN=Thoc7 PE=1 SV=2                                         | 8.823529 | 1  | 1  | 1  | 23.7   | 5.67  | 850000   |          |          | 2.933666 |
| Q62422    | Osteoclast-stimulating factor 1 OS=Mus musculus GN=Ostf1 PE=1 SV=2                                       | 3.72093  | 1  | 1  | 1  | 23.768 | 5.68  |          | 1800000  |          | 1.912454 |
| Q91V41    | Ras-related protein Rab-14 OS=Mus musculus GN=Rab14 PE=1 SV=3                                            | 20.93023 | 4  | 12 | 3  | 23.882 | 6.21  | 11000000 | 7500000  | 8700000  | 35.08606 |
| Q8BJF9    | Charged multivesicular body protein 2b OS=Mus musculus GN=Chmp2b PE=1 SV=1                               | 12.67606 | 3  | 4  | 2  | 23.919 | 8.78  | 3600000  | 3600000  | 970000   | 10.64308 |
| Q8K3J1    | NADH dehydrogenase [ubiquinone] iron-sulfur protein 8, mitochondrial OS=Mus musculus GN=Ndufs8 PE=1 SV=1 | 17.92453 | 3  | 7  | 3  | 24.023 | 6.21  | 3700000  | 1800000  | 3500000  | 19.22862 |
| Q9CYZ2    | Tumor protein D54 OS=Mus musculus GN=Tpd52I2 PE=1 SV=1                                                   | 13.63636 | 2  | 5  | 2  | 24.028 | 6.15  | 1500000  | 1500000  | 1100000  | 15.49978 |
| P35282    | Ras-related protein Rab-21 OS=Mus musculus GN=Rab21 PE=1 SV=4                                            | 31.53153 | 5  | 12 | 5  | 24.091 | 7.94  | 4000000  | 3700000  | 3500000  | 37.16152 |
| Q9CZM2    | 60S ribosomal protein L15 OS=Mus musculus GN=Rpl15 PE=2 SV=4                                             | 29.41176 | 6  | 14 | 6  | 24.131 | 11.62 | 39000000 | 44000000 | 40000000 | 35.20716 |
| P30681    | High mobility group protein B2 OS=Mus musculus GN=Hmgb2 PE=1 SV=3                                        | 38.09524 | 8  | 44 | 7  | 24.147 | 7.31  | 82000000 | 1E+08    | 93000000 | 147.7735 |
| Q922J6    | Tetraspanin-2 OS=Mus musculus GN=Tspan2 PE=1 SV=1                                                        | 5.429864 | 1  | 5  | 1  | 24.165 | 7.96  | 7900000  | 2600000  | 2000000  | 16.45182 |
| P62242    | 40S ribosomal protein S8 OS=Mus musculus GN=Rps8 PE=1 SV=2                                               | 51.92308 | 11 | 41 | 11 | 24.19  | 10.32 | 88000000 | 85000000 | 92000000 | 126.6225 |
| Q922Q5    | 39S ribosomal protein L40, mitochondrial OS=Mus musculus GN=Mrpl40 PE=1 SV=2                             | 4.368932 | 1  | 1  | 1  | 24.286 | 9.47  | 960000   |          |          | 2.205929 |
| P47963    | 60S ribosomal protein L13 OS=Mus musculus GN=Rpl13 PE=1 SV=3                                             | 24.17062 | 5  | 18 | 5  | 24.291 | 11.55 | 60000000 | 61000000 | 58000000 | 48.87027 |
| Q99LP6    | GrpE protein homolog 1, mitochondrial OS=Mus musculus GN=Grpel1 PE=1 SV=1                                | 5.069124 | 1  | 3  | 1  | 24.292 | 8.38  | 1300000  | 980000   | 1000000  | 8.234342 |
| Q8K386    | Ras-related protein Rab-15 OS=Mus musculus GN=Rab15 PE=1 SV=1                                            | 29.24528 | 4  | 8  | 2  | 24.303 | 5.71  | 81000000 | 9500000  | 9400000  | 22.09103 |
| Q9CYH2    | Redox-regulatory protein FAM213A OS=Mus musculus GN=Fam213a PE=1 SV=2                                    | 13.76147 | 3  | 6  | 3  | 24.379 | 9.17  | 2100000  | 1800000  | 1300000  | 14.74474 |
| P00761 SV | Trypsin - Sus scrofa (Pig).                                                                              | 25.10823 | 4  | 35 | 4  | 24.394 | 7.18  | 1E+09    | 2.3E+09  | 9.8E+08  | 131.5577 |
| P62827    | GTP-binding nuclear protein Ran OS=Mus musculus GN=Ran PE=1 SV=3                                         | 24.53704 | 5  | 14 | 5  | 24.408 | 7.49  | 19000000 | 22000000 | 15000000 | 38.72863 |
| Q78PG9    | Coiled-coil domain-containing protein 25 OS=Mus musculus GN=Ccdc25 PE=1 SV=1                             | 6.25     | 1  | 2  | 1  | 24.464 | 6.95  | 2000000  | 1500000  |          | 5.937531 |
| P46638    | Ras-related protein Rab-11B OS=Mus musculus GN=Rab11b PE=1 SV=3                                          | 37.15596 | 8  | 20 | 8  | 24.474 | 5.94  | 17000000 | 15000000 | 11000000 | 54.09618 |
| Q99JY3    | GTPase IMAP family member 4 OS=Mus musculus GN=Gimap4 PE=1 SV=1                                          | 10.04566 | 1  | 1  | 1  | 24.539 | 7.02  |          | 310000   |          | 2.207124 |
| Q99JH8    | ER lumen protein-retaining receptor 1 OS=Mus musculus GN=Kdelr1 PE=1 SV=1                                | 5.188679 | 1  | 3  | 1  | 24.544 | 8.62  |          | 4300000  | 4000000  | 6.975781 |
| Q8R191    | Synaptogyrin-3 OS=Mus musculus GN=Syngr3 PE=1 SV=1                                                       | 6.550218 | 1  | 3  | 1  | 24.545 | 8.18  | 6500000  | 3300000  | 950000   | 9.794398 |
| Q9D1X0    | Nucleolar protein 3 OS=Mus musculus GN=Nol3 PE=1 SV=1                                                    | 8.636364 | 1  | 3  | 1  | 24.552 | 4.07  | 290000   | 700000   | 470000   | 8.245847 |
| P00493    | Hypoxanthine-guanine phosphoribosyltransferase OS=Mus musculus GN=Hprt1 PE=1 SV=3                        | 5.504587 | 1  | 3  | 1  | 24.555 | 6.68  | 1200000  | 620000   | 630000   | 7.220677 |
| Q9D7S9    | Charged multivesicular body protein 5 OS=Mus musculus GN=Chmp5 PE=1 SV=1                                 | 3.196347 | 1  | 1  | 1  | 24.56  | 4.79  | 1800000  |          |          | 1.96912  |
| Q6ZVV3    | 60S ribosomal protein L10 OS=Mus musculus GN=Rpl10 PE=1 SV=3                                             | 20.09346 | 4  | 14 | 4  | 24.588 | 10.08 | 28000000 | 21000000 | 25000000 | 40.29755 |
| P09671    | Superoxide dismutase [Mn], mitochondrial OS=Mus musculus GN=Sod2 PE=1 SV=3                               | 19.81982 | 4  | 9  | 4  | 24.588 | 8.62  | 11000000 | 8900000  | 10000000 | 27.24197 |
| P63163    | Small nuclear ribonucleoprotein-associated protein N OS=Mus musculus GN=Snrpn PE=2 SV=1                  | 6.25     | 1  | 3  | 1  | 24.598 | 11.19 |          | 860000   | 1500000  | 9.351048 |
| P23506    | Protein-L-isoaspartate(D-aspartate) O-methyltransferase OS=Mus musculus GN=Pcmt1 PE=1 SV=3               | 9.251101 | 2  | 4  | 2  | 24.619 | 7.65  | 11000000 | 4300000  | 5700000  | 11.76766 |
| Q9DC70    | NADH dehydrogenase [ubiquinone] iron-sulfur protein 7, mitochondrial OS=Mus musculus GN=Ndufs7 PE=1 SV=1 | 14.28571 | 3  | 7  | 3  | 24.667 | 9.92  | 3400000  | 2600000  | 2100000  | 18.72735 |
| O70251    | Elongation factor 1-beta OS=Mus musculus GN=Eef1b PE=1 SV=5                                              | 33.33333 | 5  | 22 | 4  | 24.678 | 4.69  | 31000000 | 26000000 | 25000000 | 80.88232 |
| Q8VE70    | Programmed cell death protein 10 OS=Mus musculus GN=Pdcd10 PE=1 SV=1                                     | 16.98113 | 2  | 2  | 2  | 24.7   | 8.19  |          | 2200000  |          | 4.903047 |
| Q8CJ26    | Death domain-containing membrane protein NRADD OS=Mus musculus GN=Nradd PE=1 SV=1                        | 7.017544 | 1  | 3  | 1  | 24.711 | 5.01  | 710000   | 730000   | 300000   | 9.423785 |
| O08547    | Vesicle-trafficking protein SEC22b OS=Mus musculus GN=Sec22b PE=1 SV=3                                   | 41.39535 | 7  | 23 | 7  | 24.725 | 8.51  | 7600000  | 7900000  | 7000000  | 72.06976 |
| Q9R0P9    | Ubiquitin carboxyl-terminal hydrolase isozyme L1 OS=Mus musculus GN=Uchl1 PE=1 SV=1                      | 12.55605 | 2  | 6  | 2  | 24.822 | 5.24  | 5700000  | 5600000  | 4000000  | 22.56014 |
| O08709    | Peroxiredoxin-6 OS=Mus musculus GN=Prdx6 PE=1 SV=3                                                       | 22.32143 | 4  | 11 | 4  | 24.855 | 6.01  | 3600000  | 4700000  | 3200000  | 29.46206 |
| P63158    | High mobility group protein B1 OS=Mus musculus GN=Hmgb1 PE=1 SV=2                                        | 46.51163 | 12 | 49 | 11 | 24.878 | 5.74  | 1.2E+08  | 1.3E+08  | 1E+08    | 172.1243 |
| Q9D1D4    | Transmembrane emp24 domain-containing protein 10 OS=Mus musculus GN=Tmed10 PE=1 SV=1                     | 29.68037 | 7  | 22 | 7  | 24.895 | 6.7   | 10000000 | 10000000 | 14000000 | 64.38056 |
| P53026    | 60S ribosomal protein L10a OS=Mus musculus GN=Rpl10a PE=1 SV=3                                           | 25.80645 | 6  | 21 | 6  | 24.901 | 9.98  | 25000000 | 20000000 | 21000000 | 58.86909 |
| Q4VAE3    | Transmembrane protein 65 OS=Mus musculus GN=Tmem65 PE=1 SV=1                                             | 4.273504 | 1  | 1  | 1  | 24.902 | 7.78  |          | 1400000  |          | 1.976064 |
| Q9D8B3    | Charged multivesicular body protein 4b OS=Mus musculus GN=Chmp4b PE=1 SV=2                               | 4.910714 | 1  | 2  | 1  | 24.921 | 4.82  | 3000000  |          | 2600000  | 3.820038 |
| P67871    | Casein kinase II subunit beta OS=Mus musculus GN=Csnk2b PE=1 SV=1                                        | 17.67442 | 3  | 9  | 3  | 24.926 | 5.55  | 3400000  | 3000000  | 3900000  | 26.70641 |
| P70280    | Vesicle-associated membrane protein 7 OS=Mus musculus GN=Vamp7 PE=1 SV=1                                 | 8.636364 | 2  | 5  | 2  | 24.951 | 8.6   | 2000000  | 1600000  | 2100000  | 12.32198 |
| P63011    | Ras-related protein Rab-3A OS=Mus musculus GN=Rab3a PE=1 SV=1                                            | 29.54545 | 5  | 19 | 3  | 24.954 | 5.03  | 27000000 | 19000000 | 11000000 | 60.50397 |
| Q9CYN2    | Signal peptidase complex subunit 2 OS=Mus musculus GN=5pcs2 PE=1 SV=1                                    | 30.97345 | 4  | 9  | 4  | 24.962 | 8.57  | 2200000  | 2000000  | 1400000  | 32.1104  |
| P63073    | Eukaryotic translation initiation factor 4E OS=Mus musculus GN=Eif4e PE=1 SV=1                           | 10.13825 | 2  | 4  | 2  | 25.037 | 6.15  |          | 1500000  | 1500000  | 9.09938  |
| Q9CZE3    | Ras-related protein Rab-32 OS=Mus musculus GN=Rab32 PE=1 SV=3                                            | 10.76233 | 2  | 2  | 2  | 25.053 | 6.68  | 1300000  | 2200000  |          | 6.02985  |
| Q9DBZ5    | Eukaryotic translation initiation factor 3 subunit K OS=Mus musculus GN=Eif3k PE=1 SV=1                  | 5.045872 | 1  | 3  | 1  | 25.07  | 4.93  | 3400000  | 3300000  | 2700000  | 5.838413 |
| Q9DB34    | Charged multivesicular body protein 2a OS=Mus musculus GN=Chmp2a PE=1 SV=1                               | 12.61261 | 2  | 4  | 2  | 25.118 | 5.97  | 2500000  | 1600000  | 1900000  | 16.28427 |
| Q62446    | Peptidyl-prolyl cis-trans isomerase FKBP3 OS=Mus musculus GN=Fkbp3 PE=1 SV=2                             | 22.76786 | 4  | 9  | 4  | 25.132 | 9.28  | 5200000  | 6700000  | 4000000  | 26.2467  |
| Q6IRU5    | Clathrin light chain B OS=Mus musculus GN=Cltb PE=1 SV=1                                                 | 16.15721 | 4  | 11 | 4  | 25.156 | 4.63  | 7700000  | 8600000  | 5500000  | 29.77965 |
| P12979    | Myogenin OS=Mus musculus GN=Myog PE=1 SV=2                                                               | 4.017857 | 1  | 2  | 1  | 25.187 | 5.81  | 210000   |          | 30000000 | 4.288675 |

|        |                                                                                                       |          |   |    |   |        |       |          |          |          |          |
|--------|-------------------------------------------------------------------------------------------------------|----------|---|----|---|--------|-------|----------|----------|----------|----------|
| Q60631 | Growth factor receptor-bound protein 2 OS=Mus musculus GN=Grb2 PE=1 SV=1                              | 20.2765  | 4 | 7  | 4 | 25.222 | 6.32  | 6700000  | 8300000  | 6100000  | 20.04269 |
| P40240 | CD9 antigen OS=Mus musculus GN=Cd9 PE=1 SV=2                                                          | 3.097345 | 1 | 3  | 1 | 25.241 | 7.23  | 35000000 | 27000000 | 25000000 | 6.828262 |
| Q9CQI7 | U2 small nuclear ribonucleoprotein B'' OS=Mus musculus GN=Snrbp2 PE=1 SV=1                            | 4.888889 | 1 | 1  | 1 | 25.307 | 9.72  |          | 1900000  |          | 2.327171 |
| Q9JKV5 | Secretory carrier-associated membrane protein 4 OS=Mus musculus GN=Scamp4 PE=1 SV=1                   | 4.782609 | 1 | 2  | 1 | 25.326 | 8.66  |          | 3600000  | 3600000  | 5.491157 |
| Q9D8X2 | Coiled-coil domain-containing protein 124 OS=Mus musculus GN=Ccdc124 PE=1 SV=1                        | 8.294931 | 2 | 2  | 2 | 25.33  | 9.64  |          | 1800000  | 1600000  | 4.790138 |
| Q60692 | Proteasome subunit beta type-6 OS=Mus musculus GN=Psbm6 PE=1 SV=3                                     | 4.621849 | 1 | 1  | 1 | 25.362 | 5.11  | 3300000  |          |          | 3.000273 |
| Q9DCG2 | CD302 antigen OS=Mus musculus GN=Cd302 PE=1 SV=2                                                      | 6.140351 | 1 | 1  | 1 | 25.406 | 4.61  |          | 510000   |          | 3.152957 |
| P46412 | Glutathione peroxidase 3 OS=Mus musculus GN=Gpx3 PE=1 SV=2                                            | 12.83186 | 2 | 2  | 2 | 25.409 | 8.22  | 2500000  | 1500000  |          | 4.861577 |
| Q9D1C8 | Vacuolar protein sorting-associated protein 28 homolog OS=Mus musculus GN=Vps28 PE=1 SV=1             | 6.78733  | 1 | 2  | 1 | 25.436 | 5.54  |          | 580000   | 250000   | 6.666197 |
| Q8BIF0 | CD99 antigen-like protein 2 OS=Mus musculus GN=Cd99l2 PE=1 SV=1                                       | 13.92405 | 2 | 2  | 2 | 25.447 | 4.86  |          | 2200000  | 160000   | 5.046483 |
| Q78IS1 | Transmembrane emp24 domain-containing protein 3 OS=Mus musculus GN=Tmed3 PE=1 SV=1                    | 9.954751 | 2 | 4  | 2 | 25.449 | 5.96  | 4800000  |          | 4600000  | 11.34749 |
| Q62093 | Serine/arginine-rich splicing factor 2 OS=Mus musculus GN=Srsf2 PE=1 SV=4                             | 14.93213 | 4 | 39 | 4 | 25.461 | 11.85 | 28000000 | 34000000 | 36000000 | 138.938  |
| Q9JMY3 | ADP-ribosylation factor-like protein 6-interacting protein 4 OS=Mus musculus GN=Arl6ip4 PE=1 SV=1     | 12.22707 | 2 | 6  | 2 | 25.51  | 11.19 | 2300000  | 2100000  | 2100000  | 22.51936 |
| Q8BVIA | Dihydropteridine reductase OS=Mus musculus GN=Qdpr PE=1 SV=2                                          | 7.46888  | 1 | 2  | 1 | 25.554 | 7.81  | 420000   | 290000   |          | 5.309165 |
| O08585 | Clathrin light chain A OS=Mus musculus GN=Clta PE=1 SV=2                                              | 18.29787 | 6 | 11 | 6 | 25.588 | 4.58  | 6200000  | 15000000 | 4200000  | 25.95606 |
| Q9QYI6 | Dnaj homolog subfamily B member 9 OS=Mus musculus GN=Dnajb9 PE=1 SV=2                                 | 6.756757 | 1 | 1  | 1 | 25.6   | 8.28  |          |          | 460000   | 2.811934 |
| O55100 | Synaptogyrin-1 OS=Mus musculus GN=Syngr1 PE=1 SV=2                                                    | 5.128205 | 1 | 3  | 1 | 25.636 | 4.65  | 2600000  | 1000000  | 1200000  | 8.180473 |
| Q9DOB0 | Serine/arginine-rich splicing factor 9 OS=Mus musculus GN=Srsf9 PE=1 SV=1                             | 25.67568 | 6 | 13 | 6 | 25.645 | 8.65  | 3800000  | 5200000  | 3400000  | 31.66737 |
| Q9ET26 | E3 ubiquitin-protein ligase RNF114 OS=Mus musculus GN=Rnf114 PE=1 SV=2                                | 4.366812 | 1 | 1  | 1 | 25.728 | 7.03  |          |          | 910000   | 2.10266  |
| P41731 | CD63 antigen OS=Mus musculus GN=Cd63 PE=1 SV=2                                                        | 4.621849 | 1 | 1  | 1 | 25.749 | 6.98  |          | 2100000  |          | 2.200985 |
| Q9CR02 | Translation machinery-associated protein 16 OS=Mus musculus GN=Tma16 PE=1 SV=1                        | 21.26697 | 4 | 9  | 4 | 25.766 | 9.19  | 1900000  | 1800000  | 2800000  | 23.42917 |
| P35762 | CD81 antigen OS=Mus musculus GN=Cd81 PE=1 SV=2                                                        | 21.18644 | 3 | 13 | 3 | 25.797 | 5.83  | 6900000  | 4700000  | 5200000  | 47.94801 |
| Q9JIK9 | 28S ribosomal protein S34, mitochondrial OS=Mus musculus GN=Mrps34 PE=1 SV=1                          | 6.880734 | 1 | 3  | 1 | 25.811 | 10.43 | 1400000  | 1600000  | 1200000  | 8.891376 |
| P62823 | Ras-related protein Rab-3C OS=Mus musculus GN=Rab3c PE=1 SV=1                                         | 14.97797 | 3 | 7  | 1 | 25.856 | 5.24  | 3700000  | 1600000  |          | 18.98239 |
| P49722 | Proteasome subunit alpha type-2 OS=Mus musculus GN=Psm2 PE=1 SV=3                                     | 4.700855 | 1 | 3  | 1 | 25.91  | 7.43  | 6400000  | 9300000  | 4800000  | 8.154828 |
| P10649 | Glutathione S-transferase Mu 1 OS=Mus musculus GN=Gstm1 PE=1 SV=2                                     | 19.26606 | 4 | 12 | 3 | 25.953 | 7.94  | 8600000  | 5700000  | 3900000  | 33.45445 |
| P98086 | Complement C1q subcomponent subunit A OS=Mus musculus GN=C1qa PE=1 SV=2                               | 13.87755 | 3 | 10 | 3 | 25.958 | 9.11  | 17000000 | 22000000 | 20000000 | 30.32102 |
| P00405 | Cytochrome c oxidase subunit 2 OS=Mus musculus GN=Mtco2 PE=1 SV=1                                     | 3.0837   | 1 | 1  | 1 | 25.959 | 4.73  |          |          | 23000000 | 1.899357 |
| Q02105 | Complement C1q subcomponent subunit C OS=Mus musculus GN=C1qc PE=1 SV=2                               | 20.3252  | 4 | 14 | 4 | 25.975 | 8.54  | 23000000 | 19000000 | 15000000 | 41.60524 |
| Q8JZS0 | Protein lin-7 homolog A OS=Mus musculus GN=Lin7a PE=1 SV=2                                            | 10.72961 | 3 | 5  | 3 | 25.977 | 8.72  | 3500000  | 4600000  | 4400000  | 13.03417 |
| Q8R1V4 | Transmembrane emp24 domain-containing protein 4 OS=Mus musculus GN=Tmed4 PE=1 SV=1                    | 15.4185  | 3 | 9  | 2 | 26.005 | 8.18  | 11000000 | 8400000  | 8600000  | 27.04208 |
| Q61189 | Methylosome subunit pICln OS=Mus musculus GN=Clns1a PE=1 SV=1                                         | 5.508475 | 1 | 3  | 1 | 26.005 | 4.12  | 2900000  | 2500000  | 1600000  | 8.041607 |
| Q6PEB6 | MOB-like protein phocein OS=Mus musculus GN=Mob4 PE=1 SV=1                                            | 10.22222 | 2 | 6  | 2 | 26.016 | 5.78  | 4100000  | 3200000  | 2300000  | 14.62234 |
| Q9JKD3 | Secretory carrier-associated membrane protein 5 OS=Mus musculus GN=Scamp5 PE=1 SV=1                   | 4.680851 | 1 | 3  | 1 | 26.051 | 8.54  | 9900000  | 5700000  | 4900000  | 9.31316  |
| Q9D287 | Pre-mRNA-splicing factor SPF27 OS=Mus musculus GN=Bcas2 PE=1 SV=1                                     | 5.333333 | 1 | 2  | 1 | 26.115 | 5.66  |          | 2200000  | 1100000  | 6.620747 |
| P50518 | V-type proton ATPase subunit E 1 OS=Mus musculus GN=Atp6v1e1 PE=1 SV=2                                | 20.35398 | 4 | 11 | 4 | 26.141 | 8.43  | 8400000  | 7900000  | 4800000  | 34.32203 |
| Q9CXE7 | Transmembrane emp24 domain-containing protein 5 OS=Mus musculus GN=Tmed5 PE=1 SV=1                    | 14.41048 | 3 | 5  | 3 | 26.155 | 4.93  | 2300000  | 1900000  |          | 12.2774  |
| Q91YJ3 | Thymocyte nuclear protein 1 OS=Mus musculus GN=Thyn1 PE=1 SV=1                                        | 9.292035 | 2 | 2  | 2 | 26.161 | 9.11  |          | 710000   | 990000   | 5.210595 |
| Q62348 | Translin OS=Mus musculus GN=Tsn PE=1 SV=1                                                             | 6.578947 | 1 | 3  | 1 | 26.185 | 6.44  | 2800000  | 4500000  |          | 8.608363 |
| Q9CQ79 | Thioredoxin domain-containing protein 9 OS=Mus musculus GN=Txndc9 PE=1 SV=1                           | 5.752212 | 1 | 2  | 1 | 26.243 | 5.95  | 2900000  |          | 3100000  | 7.443305 |
| P51859 | Hepatoma-derived growth factor OS=Mus musculus GN=Hdgf PE=1 SV=2                                      | 26.58228 | 5 | 11 | 5 | 26.253 | 4.83  | 4000000  | 4200000  | 2600000  | 25.93027 |
| Q3UBX0 | Transmembrane protein 109 OS=Mus musculus GN=Tmem109 PE=1 SV=2                                        | 4.938272 | 1 | 3  | 1 | 26.289 | 9.89  | 6100000  | 4300000  | 3400000  | 10.05573 |
| Q80XU3 | Nuclear ubiquitous casein and cyclin-dependent kinase substrate 1 OS=Mus musculus GN=Nucks1 PE=1 SV=1 | 20.08547 | 4 | 13 | 4 | 26.298 | 5.14  | 8200000  | 7600000  | 9300000  | 41.52556 |
| Q9CRB9 | MICOS complex subunit Mic19 OS=Mus musculus GN=Chcd3 PE=1 SV=1                                        | 27.31278 | 5 | 11 | 5 | 26.318 | 8.37  | 14000000 | 10000000 | 18000000 | 32.82347 |
| O09061 | Proteasome subunit beta type-1 OS=Mus musculus GN=Psbm1 PE=1 SV=1                                     | 9.583333 | 2 | 6  | 2 | 26.355 | 7.81  | 3800000  | 2800000  | 3000000  | 16.47435 |
| Q9Z2U1 | Proteasome subunit alpha type-5 OS=Mus musculus GN=Psm5 PE=1 SV=1                                     | 16.59751 | 3 | 4  | 3 | 26.394 | 4.79  | 2900000  | 2100000  | 2700000  | 13.24066 |
| Q8BH50 | Uncharacterized protein C18orf25 homolog OS=Mus musculus PE=1 SV=1                                    | 5.714286 | 1 | 1  | 1 | 26.43  | 5.19  | 1100000  |          |          | 2.909492 |
| Q9D1D6 | Collagen triple helix repeat-containing protein 1 OS=Mus musculus GN=Cthrc1 PE=2 SV=2                 | 3.265306 | 1 | 3  | 1 | 26.443 | 7.5   | 2000000  | 1700000  | 1600000  | 7.148525 |
| O55135 | Eukaryotic translation initiation factor 6 OS=Mus musculus GN=Eif6 PE=1 SV=2                          | 17.55102 | 3 | 6  | 3 | 26.494 | 4.74  | 2700000  | 2100000  | 490000   | 16.04449 |
| Q9CXW3 | Calcyclin-binding protein OS=Mus musculus GN=Cacybp PE=1 SV=1                                         | 11.79039 | 3 | 6  | 3 | 26.494 | 7.87  | 5800000  | 5000000  | 2500000  | 15.09918 |
| Q9QY36 | N-alpha-acetyltransferase 10 OS=Mus musculus GN=Naa10 PE=1 SV=1                                       | 14.46809 | 2 | 5  | 2 | 26.503 | 5.64  | 3400000  | 2800000  | 2200000  | 17.04702 |
| Q9CY57 | Chromatin target of PRMT1 protein OS=Mus musculus GN=Chtop PE=1 SV=2                                  | 10.44177 | 2 | 5  | 2 | 26.568 | 12.23 | 880000   | 1200000  | 1100000  | 11.95871 |
| P50171 | Estradiol 17-beta-dehydrogenase 8 OS=Mus musculus GN=Hsd17b8 PE=1 SV=2                                | 5.019305 | 1 | 2  | 1 | 26.572 | 6.54  | 1000000  |          | 1100000  | 4.280788 |

|        |                                                                                                   |          |    |    |    |        |       |          |          |          |          |
|--------|---------------------------------------------------------------------------------------------------|----------|----|----|----|--------|-------|----------|----------|----------|----------|
| Q9JHS9 | Spliceosome-associated protein CWC15 homolog OS=Mus musculus GN=Cwc15 PE=1 SV=1                   | 3.49345  | 1  | 3  | 1  | 26.608 | 5.71  | 1800000  | 1800000  | 1600000  | 6.085351 |
| P48774 | Glutathione S-transferase Mu 5 OS=Mus musculus GN=Gstm5 PE=1 SV=1                                 | 13.83929 | 3  | 4  | 2  | 26.617 | 7.21  |          | 950000   | 1500000  | 9.191757 |
| P62908 | 40S ribosomal protein S3 OS=Mus musculus GN=Rps3 PE=1 SV=1                                        | 55.14403 | 12 | 39 | 12 | 26.657 | 9.66  | 52000000 | 52000000 | 47000000 | 111.8877 |
| O88384 | Vesicle transport through interaction with t-SNAREs homolog 1B OS=Mus musculus GN=Vti1b PE=1 SV=1 | 9.913793 | 2  | 3  | 2  | 26.697 | 8.79  | 1100000  | 1000000  |          | 6.327054 |
| P14106 | Complement C1q subcomponent subunit B OS=Mus musculus GN=C1qb PE=1 SV=2                           | 16.60079 | 4  | 11 | 4  | 26.701 | 8.15  | 19000000 | 30000000 | 14000000 | 34.50111 |
| Q9D8Y0 | EF-hand domain-containing protein D2 OS=Mus musculus GN=Efh2 PE=1 SV=1                            | 20       | 5  | 10 | 5  | 26.775 | 5.06  | 5200000  | 4500000  | 3800000  | 31.79098 |
| Q9DCI3 | MLN64 N-terminal domain homolog OS=Mus musculus GN=Stard3nl PE=1 SV=2                             | 4.255319 | 1  | 1  | 1  | 26.794 | 5.02  |          |          | 1100000  | 1.951964 |
| Q9JIQ3 | Diablo homolog, mitochondrial OS=Mus musculus GN=Diablo PE=1 SV=2                                 | 8.438819 | 1  | 1  | 1  | 26.804 | 6.37  |          | 940000   |          | 4.221525 |
| Q8VI63 | MOB kinase activator 2 OS=Mus musculus GN=Mob2 PE=1 SV=1                                          | 4.680851 | 1  | 1  | 1  | 26.834 | 6.52  |          |          |          | 2.152776 |
| O88983 | Syntaxin-8 OS=Mus musculus GN=Stx8 PE=1 SV=1                                                      | 3.389831 | 1  | 1  | 1  | 26.908 | 5.01  | 900000   |          |          | 2.312785 |
| O08583 | THO complex subunit 4 OS=Mus musculus GN=Alyref PE=1 SV=3                                         | 10.98039 | 2  | 9  | 2  | 26.924 | 11.15 | 3100000  | 2600000  | 1600000  | 29.59436 |
| Q9QY76 | Vesicle-associated membrane protein-associated protein B OS=Mus musculus GN=Vapb PE=1 SV=3        | 15.22634 | 3  | 10 | 3  | 26.929 | 7.78  | 14000000 | 8000000  | 8800000  | 28.43764 |
| O35130 | Ribosomal RNA small subunit methyltransferase NEP1 OS=Mus musculus GN=Emg1 PE=1 SV=1              | 5.737705 | 1  | 1  | 1  | 26.957 | 8.91  |          |          |          | 3.44533  |
| Q9JMI7 | Testis-expressed sequence 101 protein OS=Mus musculus GN=Tex101 PE=1 SV=1                         | 15.2     | 3  | 8  | 3  | 26.98  | 6.47  | 2000000  | 2200000  | 1800000  | 22.46838 |
| Q9Z1Q5 | Chloride intracellular channel protein 1 OS=Mus musculus GN=Clic1 PE=1 SV=3                       | 33.19502 | 4  | 10 | 4  | 26.996 | 5.17  | 2700000  | 4300000  | 3400000  | 27.12908 |
| P97372 | Proteasome activator complex subunit 2 OS=Mus musculus GN=Psm2 PE=1 SV=4                          | 20.08368 | 5  | 17 | 5  | 27.04  | 5.76  | 13000000 | 17000000 | 11000000 | 50.43765 |
| Q99KF1 | Transmembrane emp24 domain-containing protein 9 OS=Mus musculus GN=Tmed9 PE=1 SV=2                | 25.10638 | 4  | 7  | 3  | 27.11  | 8.41  | 17000000 | 7300000  | 13000000 | 22.07309 |
| P04370 | Myelin basic protein OS=Mus musculus GN=Mbp PE=1 SV=2                                             | 18.4     | 5  | 41 | 5  | 27.151 | 9.58  | 2E+08    | 91000000 | 93000000 | 114.3981 |
| Q9D6J6 | NADH dehydrogenase [ubiquinone] flavoprotein 2, mitochondrial OS=Mus musculus GN=Ndufv2 PE=1 SV=2 | 12.09677 | 2  | 6  | 2  | 27.268 | 7.4   | 1700000  | 1600000  | 1100000  | 16.59209 |
| Q9ERU3 | Zinc finger protein 22 OS=Mus musculus GN=Znf22 PE=1 SV=2                                         | 4.219409 | 1  | 1  | 1  | 27.277 | 10.29 | 250000   |          |          | 2.015611 |
| P08882 | Granzyme C OS=Mus musculus GN=Gzmc PE=1 SV=1                                                      | 10.48387 | 2  | 5  | 2  | 27.293 | 9.22  | 2600000  | 1900000  | 2200000  | 16.90236 |
| P35283 | Ras-related protein Rab-12 OS=Mus musculus GN=Rab12 PE=1 SV=3                                     | 10.28807 | 2  | 5  | 1  | 27.311 | 8.41  |          | 1300000  |          | 13.62256 |
| Q9WUK2 | Eukaryotic translation initiation factor 4H OS=Mus musculus GN=Eif4h PE=1 SV=3                    | 13.70968 | 3  | 6  | 3  | 27.324 | 7.23  | 23000000 | 9900000  | 2400000  | 15.72932 |
| Q9QUM9 | Proteasome subunit alpha type-6 OS=Mus musculus GN=Psm6 PE=1 SV=1                                 | 27.64228 | 6  | 10 | 6  | 27.355 | 6.76  | 3900000  | 4800000  | 2300000  | 26.33703 |
| P18181 | CD48 antigen OS=Mus musculus GN=Cd48 PE=1 SV=1                                                    | 6.25     | 1  | 1  | 1  | 27.366 | 7.69  |          |          |          | 2.414094 |
| Q9D1E6 | Tubulin-folding cofactor B OS=Mus musculus GN=Tbcb PE=1 SV=2                                      | 7.377049 | 1  | 3  | 1  | 27.368 | 5.24  | 1400000  | 1100000  |          | 9.995395 |
| O08756 | 3-hydroxyacyl-CoA dehydrogenase type-2 OS=Mus musculus GN=Hsd17b10 PE=1 SV=4                      | 12.64368 | 2  | 5  | 2  | 27.402 | 8.41  | 700000   | 960000   | 850000   | 16.4257  |
| Q9CPS7 | RNA-binding protein PNO1 OS=Mus musculus GN=Pno1 PE=1 SV=1                                        | 6.451613 | 1  | 1  | 1  | 27.437 | 9.79  |          | 84000    |          | 2.509561 |
| P04187 | Granzyme B(G,H) OS=Mus musculus GN=Gzmb PE=1 SV=1                                                 | 5.668016 | 1  | 1  | 1  | 27.452 | 9.76  |          | 490000   |          | 2.274461 |
| Q9ESX4 | Nucleolar protein of 40 kDa OS=Mus musculus GN=Zcchc17 PE=1 SV=1                                  | 5.809129 | 1  | 1  | 1  | 27.454 | 9.63  | 740000   |          |          | 2.823309 |
| Q9D1F4 | Proline-rich AKT1 substrate 1 OS=Mus musculus GN=Akt1s1 PE=1 SV=1                                 | 7.392996 | 1  | 2  | 1  | 27.466 | 4.72  | 390000   | 250000   |          | 6.25966  |
| P16110 | Galectin-3 OS=Mus musculus GN=Lgals3 PE=1 SV=3                                                    | 9.469697 | 2  | 3  | 2  | 27.498 | 8.38  |          | 3500000  |          | 7.403241 |
| Q9CXS4 | Centromere protein V OS=Mus musculus GN=Cenpv PE=1 SV=2                                           | 32.53968 | 5  | 12 | 5  | 27.524 | 9.79  | 3000000  | 4500000  | 2800000  | 40.81536 |
| Q62283 | Tetraspanin-7 OS=Mus musculus GN=Tspan7 PE=1 SV=2                                                 | 6.024096 | 1  | 1  | 1  | 27.526 | 7.2   | 3100000  |          |          | 2.494726 |
| Q9D0I8 | mRNA turnover protein 4 homolog OS=Mus musculus GN=Mrto4 PE=1 SV=1                                | 12.13389 | 3  | 5  | 3  | 27.528 | 8.54  | 2300000  | 1200000  | 4300000  | 12.47142 |
| Q9CRD0 | OClA domain-containing protein 1 OS=Mus musculus GN=Ociad1 PE=1 SV=1                              | 16.59919 | 3  | 6  | 3  | 27.593 | 7.81  | 5100000  | 4300000  | 4200000  | 22.42357 |
| Q9DCW4 | Electron transfer flavoprotein subunit beta OS=Mus musculus GN=Etfb PE=1 SV=3                     | 8.627451 | 2  | 4  | 2  | 27.606 | 8.1   |          | 2500000  | 1400000  | 9.710609 |
| Q6PDM2 | Serine/arginine-rich splicing factor 1 OS=Mus musculus GN=Srsf1 PE=1 SV=3                         | 38.70968 | 10 | 38 | 10 | 27.728 | 10.36 | 53000000 | 58000000 | 60000000 | 97.42715 |
| Q9R0H2 | Endomucin OS=Mus musculus GN=Emcn PE=1 SV=1                                                       | 6.51341  | 1  | 1  | 1  | 27.739 | 6.39  |          |          |          | 2.903577 |
| P63101 | 14-3-3 protein zeta/delta OS=Mus musculus GN=Ywhaz PE=1 SV=1                                      | 64.89796 | 17 | 59 | 13 | 27.754 | 4.79  | 1.3E+08  | 1.2E+08  | 97000000 | 188.6143 |
| P68254 | 14-3-3 protein theta OS=Mus musculus GN=Ywhaq PE=1 SV=1                                           | 51.42857 | 13 | 40 | 8  | 27.761 | 4.78  | 22000000 | 25000000 | 18000000 | 129.2776 |
| Q9CQK7 | RWD domain-containing protein 1 OS=Mus musculus GN=Rwdd1 PE=1 SV=1                                | 3.703704 | 1  | 3  | 1  | 27.768 | 4.26  | 3600000  | 2900000  | 3100000  | 7.558844 |
| Q9D883 | Splicing factor U2AF 35 kDa subunit OS=Mus musculus GN=U2af1 PE=1 SV=4                            | 12.5523  | 3  | 10 | 3  | 27.797 | 8.81  | 8600000  | 13000000 | 15000000 | 25.61624 |
| Q9WV55 | Vesicle-associated membrane protein-associated protein A OS=Mus musculus GN=Vapa PE=1 SV=2        | 17.67068 | 4  | 21 | 4  | 27.837 | 8.4   | 16000000 | 15000000 | 15000000 | 52.04171 |
| Q9Z2U0 | Proteasome subunit alpha type-7 OS=Mus musculus GN=Psm7 PE=1 SV=1                                 | 20.56452 | 5  | 11 | 5  | 27.838 | 8.46  | 9500000  | 7600000  | 7400000  | 31.63481 |
| Q9EQQ2 | Protein YIPF5 OS=Mus musculus GN=Yipf5 PE=1 SV=1                                                  | 4.669261 | 1  | 3  | 1  | 27.855 | 4.36  | 2300000  | 3200000  | 2800000  | 8.470575 |
| Q61335 | B-cell receptor-associated protein 31 OS=Mus musculus GN=Bcap31 PE=1 SV=4                         | 17.95918 | 4  | 9  | 4  | 27.939 | 8.7   | 2500000  | 5600000  | 9200000  | 23.80926 |
| Q61334 | B-cell receptor-associated protein 29 OS=Mus musculus GN=Bcap29 PE=1 SV=1                         | 5.833333 | 1  | 2  | 1  | 27.946 | 9.72  |          | 4500000  | 5000000  | 6.390614 |
| P04925 | Major prion protein OS=Mus musculus GN=Prnp PE=1 SV=2                                             | 12.20472 | 3  | 5  | 3  | 27.96  | 9.33  | 2200000  | 750000   |          | 13.62611 |
| P40630 | Transcription factor A, mitochondrial OS=Mus musculus GN=Tfam PE=1 SV=2                           | 16.04938 | 4  | 8  | 4  | 27.97  | 9.69  | 2700000  | 3000000  | 2400000  | 20.16838 |
| P62918 | 60S ribosomal protein L8 OS=Mus musculus GN=Rpl8 PE=1 SV=2                                        | 15.1751  | 4  | 14 | 4  | 28.007 | 11.03 | 35000000 | 45000000 | 34000000 | 44.40296 |
| Q8K201 | Keratinocyte-associated transmembrane protein 2 OS=Mus musculus GN=Kct2 PE=1 SV=2                 | 8.880309 | 2  | 5  | 2  | 28.033 | 5.07  | 3200000  | 2400000  | 2300000  | 12.83977 |
| Q80X85 | 28S ribosomal protein S7, mitochondrial OS=Mus musculus GN=Mrps7 PE=1 SV=1                        | 4.958678 | 1  | 1  | 1  | 28.045 | 9.94  |          |          | 1100000  | 2.628201 |

|        |                                                                                                   |          |    |    |    |        |       |          |          |          |          |
|--------|---------------------------------------------------------------------------------------------------|----------|----|----|----|--------|-------|----------|----------|----------|----------|
| Q9CQV8 | 14-3-3 protein beta/alpha OS=Mus musculus GN=Ywhab PE=1 SV=3                                      | 60.56911 | 15 | 52 | 8  | 28.069 | 4.83  | 4000000  | 3300000  | 2700000  | 170.5274 |
| Q9D172 | ES1 protein homolog, mitochondrial OS=Mus musculus GN=D10Jhu81e PE=1 SV=1                         | 3.759398 | 1  | 1  | 1  | 28.073 | 8.78  |          |          | 2400000  | 2.387598 |
| P14434 | H-2 class II histocompatibility antigen, A-B alpha chain OS=Mus musculus GN=H2-Aa PE=1 SV=2       | 20.3125  | 4  | 17 | 4  | 28.075 | 4.78  | 27000000 | 22000000 | 18000000 | 57.04684 |
| Q8BQ47 | Protein canopy homolog 4 OS=Mus musculus GN=Cnpy4 PE=1 SV=1                                       | 8.571429 | 1  | 1  | 1  | 28.076 | 4.77  |          |          |          | 3.150492 |
| P20108 | Thioredoxin-dependent peroxide reductase, mitochondrial OS=Mus musculus GN=Prdx3 PE=1 SV=1        | 3.11284  | 1  | 2  | 1  | 28.109 | 7.58  | 3800000  | 3300000  |          | 4.749416 |
| Q9CQE8 | UPF0568 protein C14orf166 homolog OS=Mus musculus PE=1 SV=1                                       | 14.34426 | 3  | 8  | 3  | 28.135 | 6.89  | 5100000  | 3900000  | 3900000  | 22.71078 |
| P68510 | 14-3-3 protein eta OS=Mus musculus GN=Ywhah PE=1 SV=2                                             | 64.22764 | 14 | 48 | 9  | 28.194 | 4.89  | 54000000 | 40000000 | 28000000 | 152.1268 |
| Q35566 | CD151 antigen OS=Mus musculus GN=Cd151 PE=1 SV=2                                                  | 5.928854 | 1  | 3  | 1  | 28.227 | 7.47  |          | 4300000  |          | 9.480971 |
| Q8BXV2 | BRI3-binding protein OS=Mus musculus GN=Bri3bp PE=1 SV=1                                          | 9.090909 | 2  | 5  | 2  | 28.245 | 9.52  | 2200000  | 2600000  | 2100000  | 12.86826 |
| Q61885 | Myelin-oligodendrocyte glycoprotein OS=Mus musculus GN=Mog PE=1 SV=1                              | 13.00813 | 3  | 4  | 3  | 28.253 | 7.96  | 5000000  | 3800000  |          | 10.15292 |
| Q9CZQ6 | Retinoic acid early-inducible protein 1-epsilon OS=Mus musculus GN=Raet1e PE=1 SV=1               | 5.179283 | 1  | 1  | 1  | 28.266 | 8.41  | 1000000  |          |          | 2.809928 |
| Q9CQE0 | E3 ubiquitin-protein ligase RNF138 OS=Mus musculus GN=Rnf138 PE=2 SV=1                            | 3.673469 | 1  | 2  | 1  | 28.28  | 7.31  | 2100000  | 2200000  |          | 5.033343 |
| P61982 | 14-3-3 protein gamma OS=Mus musculus GN=Ywhag PE=1 SV=2                                           | 54.65587 | 13 | 51 | 6  | 28.285 | 4.89  | 67000000 | 49000000 | 46000000 | 157.5699 |
| Q9CQE1 | Protein NipSnap homolog 3B OS=Mus musculus GN=Nipsnap3b PE=1 SV=1                                 | 3.643725 | 1  | 2  | 1  | 28.291 | 9.48  | 1700000  | 1500000  |          | 4.56099  |
| P57784 | U2 small nuclear ribonucleoprotein A' OS=Mus musculus GN=Snrpa1 PE=1 SV=2                         | 8.235294 | 1  | 1  | 1  | 28.34  | 8.62  | 480000   |          |          | 3.198054 |
| P57746 | V-type proton ATPase subunit D OS=Mus musculus GN=Atp6v1d PE=1 SV=1                               | 17.81377 | 3  | 10 | 3  | 28.351 | 9.45  | 3500000  | 2900000  | 3100000  | 31.70785 |
| Q8BTW3 | Exosome complex component MTR3 OS=Mus musculus GN=Exosc6 PE=1 SV=1                                | 5.860806 | 1  | 1  | 1  | 28.353 | 6.11  |          | 1500000  |          | 3.019186 |
| Q8ROA0 | General transcription factor IIF subunit 2 OS=Mus musculus GN=Gtf2f2 PE=1 SV=1                    | 7.228916 | 2  | 2  | 2  | 28.364 | 9.22  | 1100000  | 500000   |          | 4.859083 |
| O70435 | Proteasome subunit alpha type-3 OS=Mus musculus GN=Psm3 PE=1 SV=3                                 | 12.15686 | 3  | 9  | 3  | 28.387 | 5.44  | 11000000 | 9900000  | 9800000  | 21.3454  |
| O88456 | Calpain small subunit 1 OS=Mus musculus GN=Capns1 PE=1 SV=1                                       | 16.72862 | 4  | 13 | 4  | 28.445 | 5.63  | 9500000  | 8800000  | 5800000  | 41.58068 |
| Q6IRU2 | Tropomyosin alpha-4 chain OS=Mus musculus GN=Tpm4 PE=1 SV=3                                       | 45.56452 | 13 | 44 | 10 | 28.45  | 4.68  | 33000000 | 31000000 | 35000000 | 135.3251 |
| Q8COD7 | Inhibitor of growth protein 4 OS=Mus musculus GN=Ing4 PE=1 SV=2                                   | 5.220884 | 1  | 1  | 1  | 28.51  | 7.62  |          |          |          | 2.567516 |
| O35381 | Acidic leucine-rich nuclear phosphoprotein 32 family member A OS=Mus musculus GN=Anp32a PE=1 SV=1 | 14.5749  | 5  | 15 | 1  | 28.52  | 4.07  | 30000000 | 26000000 | 28000000 | 37.12145 |
| Q9D1J1 | Adaptin ear-binding coat-associated protein 2 OS=Mus musculus GN=Necap2 PE=1 SV=1                 | 5.263158 | 1  | 1  | 1  | 28.58  | 7.94  | 290000   |          |          | 2.854959 |
| P11032 | Granzyme A OS=Mus musculus GN=Gzma PE=1 SV=2                                                      | 6.923077 | 1  | 3  | 1  | 28.581 | 9.36  | 1400000  | 1400000  | 1100000  | 11.4131  |
| P97371 | Proteasome activator complex subunit 1 OS=Mus musculus GN=Psm1 PE=1 SV=2                          | 30.52209 | 6  | 18 | 6  | 28.655 | 5.97  | 14000000 | 13000000 | 9200000  | 64.86527 |
| P62754 | 40S ribosomal protein S6 OS=Mus musculus GN=Rps6 PE=1 SV=1                                        | 18.8755  | 5  | 25 | 5  | 28.663 | 10.84 | 51000000 | 49000000 | 51000000 | 72.49126 |
| Q91WE2 | Protein FAM192A OS=Mus musculus GN=Fam192a PE=1 SV=1                                              | 5.905512 | 1  | 3  | 1  | 28.684 | 5.14  | 1200000  | 830000   | 1000000  | 8.285443 |
| Q9D198 | Pre-mRNA-splicing factor SYF2 OS=Mus musculus GN=Syf2 PE=2 SV=1                                   | 4.545455 | 1  | 1  | 1  | 28.695 | 8.66  |          |          | 820000   | 2.414316 |
| Q9QYB1 | Chloride intracellular channel protein 4 OS=Mus musculus GN=Clic4 PE=1 SV=3                       | 44.26877 | 8  | 19 | 8  | 28.711 | 5.59  | 8300000  | 4800000  | 4300000  | 58.23299 |
| P70122 | Ribosome maturation protein SBDS OS=Mus musculus GN=Sbds PE=1 SV=4                                | 16.8     | 4  | 7  | 4  | 28.762 | 8.76  | 1300000  | 3800000  | 890000   | 17.45116 |
| P17918 | Proliferating cell nuclear antigen OS=Mus musculus GN=Pcna PE=1 SV=2                              | 19.54023 | 4  | 15 | 4  | 28.766 | 4.77  | 11000000 | 12000000 | 8600000  | 51.67541 |
| P57759 | Endoplasmic reticulum resident protein 29 OS=Mus musculus GN=Erp29 PE=1 SV=2                      | 19.08397 | 4  | 8  | 4  | 28.805 | 6.15  | 3800000  | 4700000  | 2700000  | 21.40897 |
| Q9DBJ1 | Phosphoglycerate mutase 1 OS=Mus musculus GN=Pgam1 PE=1 SV=3                                      | 35.43307 | 6  | 17 | 6  | 28.814 | 7.18  | 9400000  | 7900000  | 8700000  | 53.76023 |
| Q9CZ28 | Vacuolar-sorting protein SNF8 OS=Mus musculus GN=Snf8 PE=1 SV=1                                   | 4.651163 | 1  | 2  | 1  | 28.868 | 6.65  | 2000000  | 1300000  |          | 6.110387 |
| P35737 | Class II histocompatibility antigen, M beta 1 chain OS=Mus musculus GN=H2-DMb1 PE=2 SV=1          | 2.681992 | 1  | 1  | 1  | 28.88  | 7.14  |          |          | 2900000  | 1.888412 |
| O09117 | Synaptophysin-like protein 1 OS=Mus musculus GN=Synpl1 PE=1 SV=2                                  | 13.02682 | 2  | 3  | 2  | 28.881 | 8.79  | 2400000  | 1400000  | 2300000  | 7.130985 |
| Q8VCL2 | Protein SCO2 homolog, mitochondrial OS=Mus musculus GN=Sco2 PE=1 SV=1                             | 3.921569 | 1  | 2  | 1  | 28.926 | 8.29  |          | 580000   |          | 5.319819 |
| P13717 | SWISS-PROT:P13717 Nuclease - Serratia marcescens.                                                 | 34.21053 | 7  | 24 | 7  | 28.927 | 7.42  | 7500000  | 24000000 | 6100000  | 76.45025 |
| Q9CQQ7 | ATP synthase F(0) complex subunit B1, mitochondrial OS=Mus musculus GN=Atp5f1 PE=1 SV=1           | 18.75    | 5  | 21 | 5  | 28.93  | 9.06  | 29000000 | 28000000 | 17000000 | 58.97079 |
| P28078 | Class II histocompatibility antigen, M alpha chain OS=Mus musculus GN=H2-DMA PE=1 SV=1            | 3.448276 | 1  | 3  | 1  | 28.931 | 4.74  | 5900000  | 6600000  | 5900000  | 7.764122 |
| Q8BIG7 | Catechol O-methyltransferase domain-containing protein 1 OS=Mus musculus GN=Comtd1 PE=1 SV=1      | 4.580153 | 1  | 1  | 1  | 28.943 | 8.32  |          | 990000   |          | 1.838744 |
| Q61581 | Insulin-like growth factor-binding protein 7 OS=Mus musculus GN=Igfbp7 PE=1 SV=3                  | 7.829181 | 1  | 1  | 1  | 28.951 | 8.31  |          |          |          | 3.192776 |
| Q8BVF7 | Gamma-secretase subunit APH-1A OS=Mus musculus GN=Aph1a PE=2 SV=2                                 | 4.90566  | 1  | 2  | 1  | 28.967 | 7.9   | 1400000  |          | 840000   | 4.935853 |
| Q9JJK1 | Syntaxin-6 OS=Mus musculus GN=Stx6 PE=1 SV=1                                                      | 7.45098  | 1  | 1  | 1  | 28.979 | 4.92  |          | 580000   |          | 4.364038 |
| P00920 | Carbonic anhydrase 2 OS=Mus musculus GN=Ca2 PE=1 SV=4                                             | 13.84615 | 2  | 2  | 2  | 29.015 | 7.01  |          | 1600000  | 1700000  | 5.937029 |
| Q9D657 | Ribosome-recycling factor, mitochondrial OS=Mus musculus GN=Mrrf PE=1 SV=1                        | 6.10687  | 1  | 2  | 1  | 29.032 | 9.85  |          | 250000   | 1000000  | 6.17758  |
| O35955 | Proteasome subunit beta type-10 OS=Mus musculus GN=Psm10 PE=1 SV=1                                | 13.91941 | 3  | 8  | 3  | 29.045 | 6.87  | 3800000  | 4700000  | 6200000  | 22.10573 |
| Q64008 | Ras-related protein Rab-34 OS=Mus musculus GN=Rab34 PE=1 SV=2                                     | 3.088803 | 1  | 4  | 1  | 29.082 | 8.27  | 910000   | 680000   | 770000   | 9.64028  |
| P99026 | Proteasome subunit beta type-4 OS=Mus musculus GN=Psm4 PE=1 SV=1                                  | 25.37879 | 4  | 11 | 4  | 29.097 | 5.64  | 4700000  | 5100000  | 3100000  | 32.42829 |
| P97376 | Protein FRG1 OS=Mus musculus GN=Frg1 PE=1 SV=2                                                    | 4.263566 | 1  | 3  | 1  | 29.109 | 8.92  | 930000   | 890000   | 660000   | 7.350332 |
| P62259 | 14-3-3 protein epsilon OS=Mus musculus GN=Ywhae PE=1 SV=1                                         | 56.86275 | 16 | 83 | 13 | 29.155 | 4.74  | 64000000 | 61000000 | 49000000 | 255.7532 |
| O70152 | Dolichol-phosphate mannosyltransferase subunit 1 OS=Mus musculus GN=Dpm1 PE=1 SV=1                | 5.384615 | 1  | 3  | 1  | 29.156 | 9.51  | 2600000  | 2500000  | 2500000  | 10.74425 |



|        |                                                                                                          |          |    |    |    |        |       |          |          |          |          |
|--------|----------------------------------------------------------------------------------------------------------|----------|----|----|----|--------|-------|----------|----------|----------|----------|
| Q99KK1 | Receptor expression-enhancing protein 3 OS=Mus musculus GN=Reep3 PE=1 SV=1                               | 5.11811  | 1  | 2  | 1  | 29.195 | 9.58  | 1600000  | 1500000  |          | 5.722991 |
| Q91XR9 | Phospholipid hydroperoxide glutathione peroxidase, nuclear OS=Mus musculus GN=Gpx4 PE=1 SV=3             | 17.3913  | 4  | 9  | 4  | 29.234 | 10.2  | 3100000  | 1300000  | 2900000  | 23.68643 |
| Q78IK4 | MICOS complex subunit Mic27 OS=Mus musculus GN=Apool PE=1 SV=1                                           | 8.301887 | 2  | 3  | 2  | 29.242 | 9.31  | 1000000  | 1700000  | 2500000  | 7.563535 |
| Q9CR68 | Cytochrome b-c1 complex subunit Rieske, mitochondrial OS=Mus musculus GN=Uqcrcf1 PE=1 SV=1               | 14.23358 | 5  | 15 | 5  | 29.349 | 8.7   | 17000000 | 11000000 | 11000000 | 41.73874 |
| Q9D6K7 | Tetrapeptide repeat protein 33 OS=Mus musculus GN=Ttc33 PE=1 SV=1                                        | 5.343511 | 1  | 2  | 1  | 29.353 | 5.35  | 480000   | 750000   |          | 6.236035 |
| Q9CRA9 | FGFR1 oncogene partner 2 homolog OS=Mus musculus GN=Fgfr1op2 PE=1 SV=1                                   | 5.533597 | 1  | 1  | 1  | 29.356 | 5.83  | 410000   |          |          | 2.489137 |
| O08579 | Emerin OS=Mus musculus GN=Emd PE=1 SV=1                                                                  | 32.81853 | 7  | 21 | 7  | 29.417 | 5.01  | 12000000 | 11000000 | 11000000 | 62.47858 |
| Q9DC71 | 28S ribosomal protein S15, mitochondrial OS=Mus musculus GN=Mrps15 PE=1 SV=2                             | 5.813953 | 1  | 3  | 1  | 29.445 | 10.13 | 1600000  | 1800000  | 1700000  | 8.568746 |
| Q9R1P0 | Proteasome subunit alpha type-4 OS=Mus musculus GN=Psm4 PE=1 SV=1                                        | 22.60536 | 6  | 15 | 6  | 29.452 | 7.72  | 7600000  | 7100000  | 6200000  | 38.62415 |
| O88587 | Catechol O-methyltransferase OS=Mus musculus GN=Comt PE=1 SV=2                                           | 3.773585 | 1  | 1  | 1  | 29.467 | 5.83  |          | 2200000  |          | 2.39199  |
| Q66JS6 | Eukaryotic translation initiation factor 3 subunit J-B OS=Mus musculus GN=Eif3j2 PE=1 SV=1               | 28.13688 | 7  | 18 | 7  | 29.468 | 4.81  | 14000000 | 13000000 | 14000000 | 50.00505 |
| Q7TQK4 | Exosome complex component RRP40 OS=Mus musculus GN=Exosc3 PE=1 SV=3                                      | 6.20438  | 1  | 1  | 1  | 29.527 | 8.06  |          | 640000   |          | 3.453759 |
| Q9R1P4 | Proteasome subunit alpha type-1 OS=Mus musculus GN=Psm1 PE=1 SV=1                                        | 18.25095 | 4  | 14 | 4  | 29.528 | 6.46  | 13000000 | 12000000 | 8500000  | 44.01404 |
| P47758 | Signal recognition particle receptor subunit beta OS=Mus musculus GN=Srprb PE=1 SV=1                     | 23.79182 | 5  | 11 | 5  | 29.561 | 9.28  | 4600000  | 5100000  | 2500000  | 34.41327 |
| P62702 | 40S ribosomal protein S4, X isoform OS=Mus musculus GN=Rps4x PE=1 SV=2                                   | 51.3308  | 14 | 42 | 14 | 29.579 | 10.15 | 41000000 | 43000000 | 42000000 | 118.816  |
| P97822 | Acidic leucine-rich nuclear phosphoprotein 32 family member E OS=Mus musculus GN=Anp32e PE=1 SV=2        | 21.53846 | 3  | 8  | 3  | 29.604 | 3.88  | 7200000  | 5500000  | 4700000  | 27.5008  |
| P40237 | CD82 antigen OS=Mus musculus GN=Cd82 PE=1 SV=1                                                           | 8.646617 | 2  | 2  | 2  | 29.609 | 5.02  | 1500000  |          | 890000   | 5.963275 |
| P26645 | Myristoylated alanine-rich C-kinase substrate OS=Mus musculus GN=Marcks PE=1 SV=2                        | 67.31392 | 12 | 55 | 12 | 29.644 | 4.34  | 44000000 | 27000000 | 23000000 | 236.3527 |
| Q8BHL8 | Proteasome inhibitor PI31 subunit OS=Mus musculus GN=Psmf1 PE=1 SV=1                                     | 4.797048 | 1  | 1  | 1  | 29.646 | 5.25  |          | 1000000  |          | 2.782624 |
| Q62193 | Replication protein A 32 kDa subunit OS=Mus musculus GN=Rpa2 PE=1 SV=1                                   | 8.148148 | 1  | 1  | 1  | 29.7   | 6.15  |          | 200000   |          | 3.129519 |
| Q8K2Y7 | 39S ribosomal protein L47, mitochondrial OS=Mus musculus GN=Mrpl47 PE=1 SV=2                             | 4.365079 | 1  | 1  | 1  | 29.707 | 10.21 | 1300000  |          |          | 2.321002 |
| Q4VAA2 | Protein CDV3 OS=Mus musculus GN=Cdv3 PE=1 SV=2                                                           | 6.761566 | 1  | 2  | 1  | 29.711 | 6.1   | 1400000  |          | 920000   | 5.923716 |
| O88441 | Metaxin-2 OS=Mus musculus GN=Mtx2 PE=1 SV=1                                                              | 4.942966 | 1  | 1  | 1  | 29.739 | 5.63  |          |          | 390000   | 2.872656 |
| Q9CQA5 | Mediator of RNA polymerase II transcription subunit 4 OS=Mus musculus GN=Med4 PE=2 SV=1                  | 3.333333 | 1  | 3  | 1  | 29.763 | 5.05  | 6700000  | 4500000  | 5500000  | 6.190449 |
| Q6NZB0 | DnaI homolog subfamily C member 8 OS=Mus musculus GN=Dnajc8 PE=1 SV=2                                    | 16.60079 | 4  | 10 | 4  | 29.794 | 9.06  | 4300000  | 3400000  | 3400000  | 23.167   |
| P67778 | Prohibitin OS=Mus musculus GN=Phb PE=1 SV=1                                                              | 18.75    | 5  | 11 | 5  | 29.802 | 5.76  | 12000000 | 13000000 | 11000000 | 29.93121 |
| O70439 | Syntaxin-7 OS=Mus musculus GN=Stx7 PE=1 SV=3                                                             | 14.17625 | 3  | 6  | 3  | 29.802 | 5.78  | 5400000  | 3300000  | 3400000  | 18.22502 |
| Q91VN4 | MICOS complex subunit Mic25 OS=Mus musculus GN=Chchd6 PE=1 SV=2                                          | 5.128205 | 1  | 3  | 1  | 29.833 | 8.41  | 2000000  | 1200000  |          | 10.91117 |
| P97351 | 40S ribosomal protein S3a OS=Mus musculus GN=Rps3a PE=1 SV=3                                             | 45.83333 | 11 | 39 | 11 | 29.866 | 9.73  | 44000000 | 47000000 | 39000000 | 110.8248 |
| P00416 | Cytochrome c oxidase subunit 3 OS=Mus musculus GN=mt-Co3 PE=1 SV=2                                       | 5.363985 | 1  | 4  | 1  | 29.903 | 7.3   | 6600000  | 6200000  | 8500000  | 10.8219  |
| P12970 | 60S ribosomal protein L7a OS=Mus musculus GN=Rpl7a PE=1 SV=2                                             | 37.59398 | 10 | 36 | 10 | 29.958 | 10.56 | 71000000 | 72000000 | 69000000 | 100.7978 |
| Q61792 | LIM and SH3 domain protein 1 OS=Mus musculus GN=Lasp1 PE=1 SV=1                                          | 26.23574 | 6  | 13 | 6  | 29.975 | 7.05  | 5400000  | 4000000  | 4900000  | 37.28008 |
| Q61166 | Microtubule-associated protein RP/EB family member 1 OS=Mus musculus GN=Mapre1 PE=1 SV=3                 | 20.52239 | 4  | 16 | 3  | 29.997 | 5.22  | 5300000  | 4900000  | 4000000  | 53.6872  |
| Q91WN1 | DnaI homolog subfamily C member 9 OS=Mus musculus GN=Dnajc9 PE=1 SV=2                                    | 34.36293 | 8  | 21 | 8  | 30.04  | 5.94  | 9000000  | 7300000  | 4600000  | 61.18767 |
| P60202 | Myelin proteolipid protein OS=Mus musculus GN=Plp1 PE=1 SV=2                                             | 18.77256 | 5  | 19 | 5  | 30.057 | 8.35  | 1.5E+08  | 54000000 | 72000000 | 50.39801 |
| P14483 | H-2 class II histocompatibility antigen, A beta chain OS=Mus musculus GN=H2-Ab1 PE=1 SV=1                | 44.15094 | 9  | 27 | 9  | 30.109 | 7.24  | 41000000 | 35000000 | 25000000 | 96.03018 |
| Q9DCT2 | NADH dehydrogenase [ubiquinone] iron-sulfur protein 3, mitochondrial OS=Mus musculus GN=Ndufs3 PE=1 SV=2 | 15.20913 | 3  | 10 | 3  | 30.131 | 7.17  | 8700000  | 3700000  | 5000000  | 33.92153 |
| Q9D1B9 | 39S ribosomal protein L28, mitochondrial OS=Mus musculus GN=Mrpl28 PE=1 SV=3                             | 2.723735 | 1  | 1  | 1  | 30.151 | 9.29  |          |          | 500000   | 1.950735 |
| Q9CZ04 | COP9 signalosome complex subunit 7a OS=Mus musculus GN=Cops7a PE=1 SV=2                                  | 5.090909 | 1  | 2  | 1  | 30.206 | 7.87  | 1300000  | 1200000  |          | 7.034119 |
| P18468 | H-2 class II histocompatibility antigen, I-A beta chain OS=Mus musculus GN=H2-Eb1 PE=1 SV=1              | 15.90909 | 5  | 13 | 5  | 30.212 | 6.68  | 8900000  | 6900000  | 6600000  | 31.00223 |
| O89051 | Integral membrane protein 2B OS=Mus musculus GN=Itm2b PE=1 SV=1                                          | 16.16541 | 3  | 7  | 3  | 30.24  | 5.3   | 4800000  | 4100000  | 3500000  | 19.14364 |
| P28063 | Proteasome subunit beta type-8 OS=Mus musculus GN=Psm8 PE=1 SV=2                                         | 17.75362 | 4  | 12 | 4  | 30.241 | 6.68  | 13000000 | 13000000 | 9700000  | 40.79702 |
| Q921C1 | Gap junction gamma-3 protein OS=Mus musculus GN=Gjc3 PE=1 SV=2                                           | 10.03717 | 2  | 4  | 2  | 30.273 | 8.37  | 4300000  | 6100000  | 8200000  | 14.6157  |
| Q9R078 | 5'-AMP-activated protein kinase subunit beta-1 OS=Mus musculus GN=Prkab1 PE=1 SV=2                       | 6.666667 | 1  | 2  | 1  | 30.289 | 6.23  |          | 1500000  | 1600000  | 6.90488  |
| Q64310 | Surfeit locus protein 4 OS=Mus musculus GN=Surf4 PE=1 SV=1                                               | 3.345725 | 1  | 3  | 1  | 30.361 | 7.78  | 930000   | 650000   | 710000   | 6.415946 |
| Q9CX86 | Heterogeneous nuclear ribonucleoprotein A0 OS=Mus musculus GN=Hnrmpa0 PE=1 SV=1                          | 11.47541 | 2  | 9  | 2  | 30.512 | 9.31  | 11000000 | 5000000  | 3500000  | 31.52236 |
| Q9DAU1 | Protein canopy homolog 3 OS=Mus musculus GN=Cnpy3 PE=1 SV=1                                              | 6.884058 | 1  | 3  | 1  | 30.519 | 5.62  |          | 5300000  | 7200000  | 11.24729 |
| Q91VJ5 | Polyglutamine-binding protein 1 OS=Mus musculus GN=Pqbp1 PE=1 SV=1                                       | 16.73004 | 3  | 9  | 3  | 30.579 | 6.23  | 2000000  | 1700000  | 1300000  | 36.60788 |
| Q9QYI5 | DnaI homolog subfamily B member 2 OS=Mus musculus GN=Dnajb2 PE=1 SV=2                                    | 7.942238 | 2  | 4  | 1  | 30.596 | 4.98  |          |          |          | 11.42048 |
| Q00623 | Apolipoprotein A-I OS=Mus musculus GN=Apoa1 PE=1 SV=2                                                    | 20.45455 | 5  | 15 | 5  | 30.597 | 5.73  | 11000000 | 15000000 | 9700000  | 36.61595 |
| Q60931 | Voltage-dependent anion-selective channel protein 3 OS=Mus musculus GN=Vdac3 PE=1 SV=1                   | 13.78092 | 3  | 11 | 2  | 30.733 | 8.79  | 5300000  | 2800000  | 2700000  | 33.94022 |
| Q8BL97 | Serine/arginine-rich splicing factor 7 OS=Mus musculus GN=Srsf7 PE=1 SV=1                                | 21.34831 | 6  | 17 | 5  | 30.799 | 11.9  | 12000000 | 14000000 | 16000000 | 51.89882 |
| Q99020 | Heterogeneous nuclear ribonucleoprotein A/B OS=Mus musculus GN=Hnrnpab PE=1 SV=1                         | 23.85965 | 5  | 19 | 4  | 30.812 | 7.91  | 46000000 | 38000000 | 37000000 | 57.70129 |



|        |                                                                                                           |          |    |    |    |        |       |          |          |          |          |
|--------|-----------------------------------------------------------------------------------------------------------|----------|----|----|----|--------|-------|----------|----------|----------|----------|
| O35326 | Serine/arginine-rich splicing factor 5 OS=Mus musculus GN=Srsf5 PE=1 SV=2                                 | 25.65056 | 9  | 25 | 8  | 30.873 | 11.56 | 14000000 | 11000000 | 15000000 | 82.17419 |
| P53702 | Cytochrome c-type heme lyase OS=Mus musculus GN=Hccs PE=1 SV=2                                            | 15.44118 | 3  | 8  | 3  | 30.958 | 7.12  | 4700000  | 4000000  | 3800000  | 25.35639 |
| O35658 | Complement component 1 Q subcomponent-binding protein, mitochondrial OS=Mus musculus GN=C1qbp PE=1 SV=1   | 24.82014 | 5  | 13 | 5  | 30.994 | 4.92  | 6800000  | 7800000  | 7200000  | 41.74383 |
| O08807 | Peroxisiredoxin-4 OS=Mus musculus GN=Prdx4 PE=1 SV=1                                                      | 10.58394 | 3  | 11 | 1  | 31.033 | 7.15  | 7700000  | 10000000 | 4300000  | 27.74471 |
| Q9EST5 | Acidic leucine-rich nuclear phosphoprotein 32 family member B OS=Mus musculus GN=Anp32b PE=1 SV=1         | 18.38235 | 6  | 19 | 2  | 31.06  | 4.01  | 25000000 | 23000000 | 36000000 | 44.41246 |
| Q5NBU8 | XIAP-associated factor 1 OS=Mus musculus GN=Xaf1 PE=1 SV=3                                                | 9.89011  | 2  | 3  | 2  | 31.096 | 8.54  | 840000   | 480000   |          | 7.216036 |
| Q80UJ2 | Ribonuclease P protein subunit p38 OS=Mus musculus GN=Rpp38 PE=1 SV=1                                     | 5.714286 | 1  | 1  | 1  | 31.11  | 9.73  |          |          | 270000   | 2.323415 |
| P35802 | Neuronal membrane glycoprotein M6-a OS=Mus musculus GN=Gpm6a PE=1 SV=1                                    | 12.58993 | 4  | 13 | 4  | 31.128 | 5.27  | 36000000 | 12000000 | 14000000 | 33.46098 |
| P24668 | Cation-dependent mannose-6-phosphate receptor OS=Mus musculus GN=M6pr PE=1 SV=1                           | 24.82014 | 6  | 14 | 6  | 31.152 | 5.39  | 18000000 | 12000000 | 7400000  | 42.00351 |
| Q80X71 | Transmembrane protein 106B OS=Mus musculus GN=Tmem106b PE=1 SV=1                                          | 5.090909 | 1  | 2  | 1  | 31.153 | 6.68  | 260000   | 640000   |          | 4.946715 |
| Q9ER00 | Syntaxin-12 OS=Mus musculus GN=Stx12 PE=1 SV=1                                                            | 8.759124 | 2  | 5  | 2  | 31.176 | 5.44  | 3300000  | 2500000  | 2300000  | 14.35902 |
| Q3KNM2 | E3 ubiquitin-protein ligase MARCH5 OS=Mus musculus GN=March5 PE=1 SV=1                                    | 4.676259 | 1  | 1  | 1  | 31.211 | 8.7   |          | 220000   |          | 1.839313 |
| P25444 | 40S ribosomal protein S2 OS=Mus musculus GN=Rps2 PE=1 SV=3                                                | 34.81229 | 10 | 37 | 10 | 31.212 | 10.24 | 30000000 | 33000000 | 36000000 | 100.6294 |
| Q3U2S8 | Voltage-gated hydrogen channel 1 OS=Mus musculus GN=Hvcn1 PE=1 SV=2                                       | 13.3829  | 1  | 2  | 1  | 31.223 | 7.06  | 3900000  | 2500000  |          | 10.4302  |
| O54901 | OX-2 membrane glycoprotein OS=Mus musculus GN=Cd200 PE=1 SV=1                                             | 4.316547 | 1  | 2  | 1  | 31.236 | 8.79  | 3800000  | 3000000  |          | 4.928986 |
| Q7TQI3 | Ubiquitin thioesterase OTUB1 OS=Mus musculus GN=Otub1 PE=1 SV=2                                           | 9.9631   | 2  | 3  | 2  | 31.25  | 4.94  | 3000000  | 770000   |          | 10.30013 |
| P57776 | Elongation factor 1-delta OS=Mus musculus GN=Eef1d PE=1 SV=3                                              | 38.07829 | 8  | 31 | 7  | 31.274 | 5.02  | 48000000 | 38000000 | 38000000 | 96.44639 |
| Q9R0U0 | Serine/arginine-rich splicing factor 10 OS=Mus musculus GN=Srsf10 PE=1 SV=2                               | 8.396947 | 2  | 8  | 2  | 31.282 | 11.27 | 8000000  | 8600000  | 8300000  | 24.54855 |
| P97760 | DNA-directed RNA polymerase II subunit RPB3 OS=Mus musculus GN=Polr2c PE=1 SV=1                           | 13.45455 | 2  | 4  | 2  | 31.292 | 4.97  | 2800000  | 1600000  |          | 10.73864 |
| Q9R0P3 | S-formylglutathione hydrolase OS=Mus musculus GN=Esd PE=1 SV=1                                            | 4.255319 | 1  | 3  | 1  | 31.299 | 7.12  | 2400000  | 2100000  | 1900000  | 7.494921 |
| Q8CIL4 | Uncharacterized protein C1orf131 homolog OS=Mus musculus PE=1 SV=1                                        | 9.252669 | 2  | 4  | 2  | 31.325 | 9.85  | 1000000  |          | 880000   | 10.59983 |
| P47757 | F-actin-capping protein subunit beta OS=Mus musculus GN=Capzb PE=1 SV=3                                   | 32.85199 | 8  | 21 | 8  | 31.326 | 5.74  | 14000000 | 12000000 | 10000000 | 55.18633 |
| Q08331 | Calretinin OS=Mus musculus GN=Calb2 PE=1 SV=3                                                             | 9.9631   | 2  | 3  | 2  | 31.353 | 5.02  | 910000   | 260000   | 960000   | 8.58493  |
| Q9CWS0 | N(G),N(G)-dimethylarginine dimethylaminohydrolase 1 OS=Mus musculus GN=Ddah1 PE=1 SV=3                    | 18.24561 | 4  | 14 | 4  | 31.361 | 5.97  | 4400000  | 3600000  | 4100000  | 43.90276 |
| Q8VBT0 | Thioredoxin-related transmembrane protein 1 OS=Mus musculus GN=Tmx1 PE=1 SV=1                             | 11.15108 | 3  | 9  | 3  | 31.376 | 5.29  | 8700000  | 8800000  | 8400000  | 24.26266 |
| P14148 | 60S ribosomal protein L7 OS=Mus musculus GN=Rpl7 PE=1 SV=2                                                | 37.03704 | 12 | 38 | 12 | 31.4   | 10.89 | 60000000 | 57000000 | 48000000 | 99.93075 |
| Q8BH95 | Enoyl-CoA hydratase, mitochondrial OS=Mus musculus GN=Echs1 PE=1 SV=1                                     | 15.51724 | 4  | 9  | 4  | 31.454 | 8.48  | 3000000  | 3100000  | 2600000  | 26.16001 |
| P53811 | Phosphatidylinositol transfer protein beta isoform OS=Mus musculus GN=Pitpnb PE=1 SV=2                    | 4.797048 | 1  | 1  | 1  | 31.467 | 6.95  |          | 1400000  |          | 3.028388 |
| Q01730 | Ras suppressor protein 1 OS=Mus musculus GN=Rsu1 PE=1 SV=3                                                | 6.859206 | 2  | 4  | 2  | 31.531 | 8.88  | 890000   | 1300000  | 1100000  | 8.046801 |
| P04441 | H-2 class II histocompatibility antigen gamma chain OS=Mus musculus GN=Cd74 PE=1 SV=3                     | 16.84588 | 5  | 15 | 5  | 31.537 | 8.34  | 6100000  | 5400000  | 3700000  | 37.55461 |
| Q9CZT6 | Protein CMSS1 OS=Mus musculus GN=Cmss1 PE=2 SV=1                                                          | 4.710145 | 1  | 1  | 1  | 31.574 | 8.46  |          | 700000   |          | 2.446385 |
| O35083 | 1-acyl-sn-glycerol-3-phosphate acyltransferase alpha OS=Mus musculus GN=Agpat1 PE=1 SV=1                  | 4.912281 | 1  | 3  | 1  | 31.689 | 9.14  | 2700000  | 1800000  | 2200000  | 8.985074 |
| Q9CWE0 | Mitochondrial fission regulator 1-like OS=Mus musculus GN=Mtfr1l PE=1 SV=1                                | 10.0346  | 2  | 2  | 2  | 31.706 | 6.1   | 970000   |          |          | 5.597733 |
| Q60930 | Voltage-dependent anion-selective channel protein 2 OS=Mus musculus GN=Vdac2 PE=1 SV=2                    | 22.0339  | 5  | 13 | 5  | 31.713 | 7.49  | 46000000 | 30000000 | 31000000 | 43.2565  |
| Q9CQA3 | Succinate dehydrogenase [ubiquinone] iron-sulfur subunit, mitochondrial OS=Mus musculus GN=Sdhb PE=1 SV=1 | 17.7305  | 5  | 9  | 5  | 31.793 | 8.68  | 10000000 | 3300000  | 7200000  | 22.89029 |
| Q9D0M0 | Exosome complex exonuclease RRP42 OS=Mus musculus GN=Exosc7 PE=1 SV=2                                     | 9.621993 | 2  | 3  | 2  | 31.805 | 5.19  | 1700000  | 1400000  | 1200000  | 8.036978 |
| Q9CXX9 | CUE domain-containing protein 2 OS=Mus musculus GN=Cuedc2 PE=1 SV=1                                       | 5.633803 | 1  | 1  | 1  | 31.832 | 4.98  | 370000   |          |          | 2.997156 |
| Q9D8C4 | Interferon-induced 35 kDa protein homolog OS=Mus musculus GN=Ifi35 PE=1 SV=3                              | 9.090909 | 2  | 2  | 2  | 31.856 | 5.87  |          | 1700000  |          | 5.764001 |
| P97447 | Four and a half LIM domains protein 1 OS=Mus musculus GN=Fhl1 PE=1 SV=3                                   | 4.285714 | 1  | 1  | 1  | 31.867 | 8.37  |          | 1300000  |          | 2.299057 |
| P53810 | Phosphatidylinositol transfer protein alpha isoform OS=Mus musculus GN=Pitpna PE=1 SV=2                   | 7.01107  | 1  | 2  | 1  | 31.873 | 6.37  | 2700000  |          | 3600000  | 6.500436 |
| Q6PER3 | Microtubule-associated protein RP/EB family member 3 OS=Mus musculus GN=Mapre3 PE=1 SV=1                  | 12.45552 | 3  | 9  | 2  | 31.946 | 5.54  | 2900000  | 1900000  | 1200000  | 22.67164 |
| Q8BX10 | Serine/threonine-protein phosphatase PGAM5, mitochondrial OS=Mus musculus GN=Pgam5 PE=1 SV=1              | 3.125    | 1  | 3  | 1  | 31.975 | 9.04  | 440000   | 320000   | 400000   | 7.179098 |
| Q9Z1R4 | Uncharacterized protein C6orf47 homolog OS=Mus musculus GN=D17h6s53e PE=1 SV=1                            | 4.095563 | 1  | 3  | 1  | 31.995 | 6.89  | 1400000  | 1300000  | 1200000  | 7.372927 |
| Q9CY50 | Translocon-associated protein subunit alpha OS=Mus musculus GN=Ssr1 PE=1 SV=1                             | 17.13287 | 3  | 9  | 3  | 32.045 | 4.45  | 10000000 | 16000000 | 15000000 | 31.70099 |
| P27512 | Tumor necrosis factor receptor superfamily member 5 OS=Mus musculus GN=Cd40 PE=1 SV=3                     | 5.882353 | 1  | 2  | 1  | 32.071 | 6.74  | 1100000  |          | 780000   | 5.621374 |
| Q3TDK6 | Protein rogdi homolog OS=Mus musculus GN=Rogdi PE=1 SV=2                                                  | 5.226481 | 1  | 1  | 1  | 32.08  | 8.18  |          |          |          | 3.940774 |
| Q91XB7 | Protein YIF1A OS=Mus musculus GN=Yif1a PE=1 SV=1                                                          | 5.119454 | 1  | 2  | 1  | 32.114 | 9.09  | 120000   |          |          | 4.440864 |
| Q5EBJ4 | Ermin OS=Mus musculus GN=Ermin PE=1 SV=1                                                                  | 4.982206 | 1  | 3  | 1  | 32.128 | 4.59  | 2700000  | 1100000  | 1400000  | 10.71569 |
| Q9Z2D8 | Methyl-CpG-binding domain protein 3 OS=Mus musculus GN=Mbd3 PE=1 SV=1                                     | 7.368421 | 1  | 2  | 1  | 32.148 | 5.82  |          |          | 1200000  | 7.376273 |
| P17751 | Triosephosphate isomerase OS=Mus musculus GN=Tpi1 PE=1 SV=4                                               | 17.05686 | 4  | 15 | 4  | 32.171 | 5.74  | 6300000  | 5300000  | 5500000  | 43.60084 |
| Q8CDN6 | Thioredoxin-like protein 1 OS=Mus musculus GN=Txn1 PE=1 SV=3                                              | 19.37716 | 4  | 8  | 4  | 32.217 | 4.96  | 1900000  | 2100000  | 1400000  | 25.05378 |
| Q9QZ47 | Troponin T, fast skeletal muscle OS=Mus musculus GN=Tnnt3 PE=1 SV=3                                       | 2.941176 | 1  | 1  | 1  | 32.221 | 5.31  |          |          | 3300000  | 2.175696 |
| P42125 | Enoyl-CoA delta isomerase 1, mitochondrial OS=Mus musculus GN=Eci1 PE=1 SV=2                              | 4.49827  | 1  | 1  | 1  | 32.23  | 8.98  | 1200000  |          |          | 2.942576 |

|        |                                                                                                    |          |    |    |    |        |       |          |          |          |          |
|--------|----------------------------------------------------------------------------------------------------|----------|----|----|----|--------|-------|----------|----------|----------|----------|
| Q8CCS6 | Polyadenylate-binding protein 2 OS=Mus musculus GN=Pabpn1 PE=1 SV=3                                | 18.54305 | 2  | 5  | 2  | 32.277 | 5.17  | 4500000  | 3900000  | 3200000  | 14.73271 |
| Q924T2 | 28S ribosomal protein S2, mitochondrial OS=Mus musculus GN=Mmps2 PE=1 SV=1                         | 7.216495 | 1  | 3  | 1  | 32.293 | 9.14  | 1100000  | 910000   | 630000   | 9.291337 |
| Q6PFR5 | Transformer-2 protein homolog alpha OS=Mus musculus GN=Tra2a PE=1 SV=1                             | 13.879   | 4  | 7  | 3  | 32.297 | 11.28 | 2300000  | 3300000  | 2200000  | 19.06112 |
| Q6ZQI3 | Malectin OS=Mus musculus GN=Mlec PE=1 SV=2                                                         | 24.74227 | 7  | 19 | 7  | 32.322 | 6.05  | 12000000 | 11000000 | 9800000  | 66.18576 |
| Q60932 | Voltage-dependent anion-selective channel protein 1 OS=Mus musculus GN=Vdac1 PE=1 SV=3             | 32.43243 | 8  | 33 | 7  | 32.331 | 8.43  | 90000000 | 54000000 | 54000000 | 114.4444 |
| O88792 | Junctional adhesion molecule A OS=Mus musculus GN=F11r PE=1 SV=2                                   | 17       | 3  | 5  | 3  | 32.403 | 6.77  | 1800000  | 1700000  | 880000   | 16.96161 |
| Q61937 | Nucleophosmin OS=Mus musculus GN=Npm1 PE=1 SV=1                                                    | 38.0137  | 11 | 68 | 11 | 32.54  | 4.77  | 1.8E+08  | 2E+08    | 1.8E+08  | 251.0992 |
| Q9DC16 | Endoplasmic reticulum-Golgi intermediate compartment protein 1 OS=Mus musculus GN=Ergic1 PE=1 SV=1 | 6.896552 | 2  | 4  | 2  | 32.541 | 7.06  | 3700000  | 4100000  | 2300000  | 10.36805 |
| Q9D819 | Inorganic pyrophosphatase OS=Mus musculus GN=Ppa1 PE=1 SV=1                                        | 5.536332 | 1  | 1  | 1  | 32.646 | 5.6   | 200000   |          |          | 2.571636 |
| Q9JLJ5 | Elongation of very long chain fatty acids protein 1 OS=Mus musculus GN=Elov11 PE=1 SV=1            | 5.017921 | 1  | 3  | 1  | 32.656 | 9.63  | 1800000  | 1100000  | 1200000  | 9.341904 |
| P58771 | Tropomyosin alpha-1 chain OS=Mus musculus GN=Tpm1 PE=1 SV=1                                        | 33.80282 | 10 | 42 | 4  | 32.661 | 4.74  | 47000000 | 45000000 | 53000000 | 126.5964 |
| Q9EP73 | Programmed cell death 1 ligand 1 OS=Mus musculus GN=Cd274 PE=1 SV=1                                | 3.793103 | 1  | 2  | 1  | 32.76  | 6.23  | 5000000  |          | 3400000  | 4.852645 |
| P58774 | Tropomyosin beta chain OS=Mus musculus GN=Tpm2 PE=1 SV=1                                           | 32.04225 | 10 | 28 | 3  | 32.817 | 4.7   | 3300000  | 2800000  | 3400000  | 85.34738 |
| P14206 | 40S ribosomal protein SA OS=Mus musculus GN=Rpsa PE=1 SV=4                                         | 24.40678 | 5  | 20 | 5  | 32.817 | 4.87  | 15000000 | 12000000 | 13000000 | 63.48742 |
| Q9EQ06 | Estradiol 17-beta-dehydrogenase 11 OS=Mus musculus GN=Hsd17b11 PE=1 SV=1                           | 3.691275 | 1  | 3  | 1  | 32.86  | 8.66  | 4700000  | 4300000  | 3500000  | 7.839579 |
| Q91VR2 | ATP synthase subunit gamma, mitochondrial OS=Mus musculus GN=Atp5c1 PE=1 SV=1                      | 18.12081 | 5  | 17 | 5  | 32.865 | 9.01  | 24000000 | 18000000 | 18000000 | 46.6852  |
| Q3UL36 | Arginine and glutamate-rich protein 1 OS=Mus musculus GN=Arglu1 PE=1 SV=2                          | 5.904059 | 2  | 4  | 2  | 32.868 | 10.36 | 12000000 | 5700000  |          | 8.777703 |
| P48962 | ADP/ATP translocase 1 OS=Mus musculus GN=Slc25a4 PE=1 SV=4                                         | 29.86577 | 9  | 27 | 6  | 32.883 | 9.72  | 54000000 | 32000000 | 36000000 | 73.83211 |
| P18828 | Syndecan-1 OS=Mus musculus GN=Sdc1 PE=1 SV=1                                                       | 9.646302 | 2  | 4  | 2  | 32.884 | 4.79  | 550000   | 650000   | 240000   | 10.05916 |
| Q8R088 | Golgi phosphoprotein 3-like OS=Mus musculus GN=Golph3l PE=1 SV=1                                   | 9.824561 | 2  | 5  | 2  | 32.885 | 5.99  | 1500000  | 1400000  | 1100000  | 15.92731 |
| O88271 | Craniofacial development protein 1 OS=Mus musculus GN=Cfdp1 PE=1 SV=1                              | 16.94915 | 4  | 6  | 4  | 32.901 | 4.86  | 1600000  | 2100000  | 3500000  | 16.8713  |
| Q9QZE7 | Translin-associated protein X OS=Mus musculus GN=Tsnax PE=1 SV=1                                   | 9.655172 | 2  | 4  | 2  | 32.906 | 6.55  | 1600000  | 760000   | 710000   | 12.09258 |
| P51881 | ADP/ATP translocase 2 OS=Mus musculus GN=Slc25a5 PE=1 SV=3                                         | 26.84564 | 8  | 22 | 5  | 32.91  | 9.73  | 30000000 | 22000000 | 33000000 | 57.26764 |
| O55126 | Protein NipSnap homolog 2 OS=Mus musculus GN=Gbas PE=1 SV=1                                        | 4.982206 | 1  | 3  | 1  | 32.912 | 9.26  | 240000   | 450000   | 320000   | 7.015285 |
| P20352 | Tissue factor OS=Mus musculus GN=F3 PE=1 SV=2                                                      | 11.56463 | 2  | 4  | 2  | 32.914 | 9.32  | 1300000  | 640000   | 860000   | 11.14378 |
| P47753 | F-actin-capping protein subunit alpha-1 OS=Mus musculus GN=Capza1 PE=1 SV=4                        | 17.83217 | 3  | 6  | 2  | 32.919 | 5.55  | 11000000 | 6500000  | 8100000  | 19.48426 |
| P47754 | F-actin-capping protein subunit alpha-2 OS=Mus musculus GN=Capza2 PE=1 SV=3                        | 36.01399 | 6  | 15 | 5  | 32.947 | 5.85  | 6700000  | 6600000  | 6900000  | 54.22661 |
| Q69ZQ2 | Pre-mRNA-splicing factor ISY1 homolog OS=Mus musculus GN=Isy1 PE=1 SV=2                            | 4.912281 | 1  | 3  | 1  | 32.969 | 5.17  | 2000000  | 2100000  | 1800000  | 10.4212  |
| P21107 | Tropomyosin alpha-3 chain OS=Mus musculus GN=Tpm3 PE=1 SV=3                                        | 31.22807 | 10 | 45 | 4  | 32.974 | 4.72  | 71000000 | 61000000 | 70000000 | 131.282  |
| Q8CAK3 | Repressor of yield of DENV protein homolog OS=Mus musculus GN=Ryden PE=2 SV=1                      | 6.551724 | 1  | 2  | 1  | 32.994 | 7.28  | 980000   | 510000   |          | 4.469101 |
| O35526 | Syntaxin-1A OS=Mus musculus GN=Stx1a PE=1 SV=3                                                     | 31.25    | 8  | 24 | 7  | 33.034 | 5.24  | 12000000 | 10000000 | 8100000  | 71.15268 |
| Q9DCU6 | 39S ribosomal protein L4, mitochondrial OS=Mus musculus GN=Mprl4 PE=1 SV=1                         | 3.741497 | 1  | 1  | 1  | 33.052 | 9.82  | 840000   |          |          | 2.431231 |
| Q61735 | Leukocyte surface antigen CD47 OS=Mus musculus GN=Cd47 PE=1 SV=2                                   | 10.89109 | 3  | 8  | 3  | 33.076 | 8.63  | 9200000  | 2900000  | 3600000  | 21.64149 |
| Q08093 | Calponin-2 OS=Mus musculus GN=Cnn2 PE=1 SV=1                                                       | 12.13115 | 3  | 5  | 2  | 33.134 | 7.62  |          | 1100000  | 940000   | 15.38292 |
| Q64012 | RNA-binding protein Raly OS=Mus musculus GN=Raly PE=1 SV=3                                         | 33.01282 | 8  | 25 | 8  | 33.168 | 8.84  | 10000000 | 10000000 | 10000000 | 76.90936 |
| Q9DB05 | Alpha-soluble NSF attachment protein OS=Mus musculus GN=Napa PE=1 SV=1                             | 35.59322 | 9  | 22 | 8  | 33.168 | 5.45  | 8000000  | 7200000  | 5300000  | 66.5629  |
| Q64704 | Syntaxin-3 OS=Mus musculus GN=Stx3 PE=1 SV=1                                                       | 3.806228 | 1  | 1  | 1  | 33.222 | 5.45  | 730000   |          |          | 2.501001 |
| P61264 | Syntaxin-1B OS=Mus musculus GN=Stx1b PE=1 SV=1                                                     | 37.15278 | 9  | 33 | 8  | 33.224 | 5.38  | 35000000 | 17000000 | 15000000 | 106.3701 |
| Q91238 | Tetratricopeptide repeat protein 1 OS=Mus musculus GN=Ttc1 PE=1 SV=1                               | 15.75342 | 3  | 5  | 3  | 33.242 | 5.01  | 1100000  | 1500000  | 1100000  | 16.16511 |
| P49615 | Cyclin-dependent-like kinase 5 OS=Mus musculus GN=Cdk5 PE=1 SV=1                                   | 7.876712 | 2  | 7  | 1  | 33.267 | 7.66  | 1200000  | 890000   | 1000000  | 17.01234 |
| O35129 | Prohibitin-2 OS=Mus musculus GN=Phb2 PE=1 SV=1                                                     | 23.74582 | 6  | 13 | 6  | 33.276 | 9.83  | 14000000 | 16000000 | 9600000  | 39.19361 |
| Q9D0L7 | Armadillo repeat-containing protein 10 OS=Mus musculus GN=Armc10 PE=1 SV=1                         | 11.76471 | 3  | 9  | 3  | 33.29  | 7.99  | 1700000  | 1900000  | 1800000  | 24.02273 |
| Q9CPV4 | Glyoxalase domain-containing protein 4 OS=Mus musculus GN=Glod4 PE=1 SV=1                          | 5.033557 | 1  | 2  | 1  | 33.296 | 5.47  | 2400000  | 2400000  |          | 5.236706 |
| Q99PQ1 | Tripartite motif-containing protein 12A OS=Mus musculus GN=Trim12a PE=2 SV=1                       | 7.394366 | 2  | 4  | 2  | 33.299 | 7.27  | 1900000  | 1900000  | 1700000  | 10.5936  |
| P14231 | Sodium/potassium-transporting ATPase subunit beta-2 OS=Mus musculus GN=Atp1b2 PE=1 SV=2            | 15.51724 | 5  | 10 | 5  | 33.322 | 8.31  | 8500000  | 4600000  | 3500000  | 30.3451  |
| O55125 | Protein NipSnap homolog 1 OS=Mus musculus GN=Nipsnap1 PE=1 SV=1                                    | 3.169014 | 1  | 3  | 1  | 33.342 | 9.44  | 6500000  | 4700000  | 4900000  | 7.757509 |
| Q9EQU5 | Protein SET OS=Mus musculus GN=Set PE=1 SV=1                                                       | 25.95156 | 6  | 21 | 6  | 33.358 | 4.32  | 36000000 | 34000000 | 32000000 | 78.15812 |
| O35678 | Monoglyceride lipase OS=Mus musculus GN=Mgll PE=1 SV=1                                             | 4.620462 | 1  | 1  | 1  | 33.366 | 7.15  |          |          |          | 2.757062 |
| Q9JLZ3 | Methylglutaconyl-CoA hydratase, mitochondrial OS=Mus musculus GN=Auh PE=1 SV=1                     | 4.458599 | 1  | 2  | 1  | 33.374 | 9.51  | 1200000  | 900000   |          | 4.906563 |
| Q8WTY4 | Anamorsin OS=Mus musculus GN=Ciapi1 PE=1 SV=1                                                      | 3.883495 | 1  | 1  | 1  | 33.408 | 5.2   |          | 840000   |          | 2.419666 |
| Q9QZH3 | Peptidyl-prolyl cis-trans isomerase E OS=Mus musculus GN=Ppie PE=1 SV=2                            | 2.990033 | 1  | 2  | 1  | 33.428 | 5.6   |          | 760000   | 640000   | 5.11058  |
| Q791V5 | Mitochondrial carrier homolog 2 OS=Mus musculus GN=Mtch2 PE=1 SV=1                                 | 15.18152 | 4  | 8  | 4  | 33.477 | 8.25  | 6500000  | 6000000  | 4300000  | 22.00448 |
| P47911 | 60S ribosomal protein L6 OS=Mus musculus GN=Rpl6 PE=1 SV=3                                         | 29.05405 | 12 | 39 | 12 | 33.489 | 10.7  | 41000000 | 57000000 | 38000000 | 94.23089 |

|        |                                                                                                          |          |    |    |    |        |       |          |          |          |          |
|--------|----------------------------------------------------------------------------------------------------------|----------|----|----|----|--------|-------|----------|----------|----------|----------|
| Q9CY64 | Biliverdin reductase A OS=Mus musculus GN=Blvra PE=1 SV=1                                                | 4.745763 | 1  | 2  | 1  | 33.504 | 7.02  | 800000   | 980000   |          | 5.077569 |
| P28663 | Beta-soluble NSF attachment protein OS=Mus musculus GN=Napb PE=1 SV=2                                    | 35.57047 | 8  | 20 | 7  | 33.535 | 5.47  | 9200000  | 4400000  | 4000000  | 62.7898  |
| Q9Z130 | Heterogeneous nuclear ribonucleoprotein D-like OS=Mus musculus GN=Hnrnpdl PE=1 SV=1                      | 15.94684 | 4  | 17 | 3  | 33.538 | 7.31  | 15000000 | 11000000 | 12000000 | 53.11015 |
| Q61069 | Upstream stimulatory factor 1 OS=Mus musculus GN=Usf1 PE=1 SV=1                                          | 2.903226 | 1  | 1  | 1  | 33.55  | 5.54  |          | 310000   |          | 2.385608 |
| Q922Q4 | Pyroline-5-carboxylate reductase 2 OS=Mus musculus GN=Pycr2 PE=1 SV=1                                    | 9.0625   | 2  | 5  | 2  | 33.638 | 7.77  | 2000000  | 2100000  | 1700000  | 14.88286 |
| P62996 | Transformer-2 protein homolog beta OS=Mus musculus GN=Tra2b PE=1 SV=1                                    | 22.91667 | 6  | 15 | 5  | 33.646 | 11.25 | 3600000  | 9600000  | 5700000  | 44.5576  |
| Q80UW2 | F-box only protein 2 OS=Mus musculus GN=Fbxo2 PE=1 SV=1                                                  | 17.84512 | 3  | 6  | 3  | 33.655 | 4.28  | 990000   | 1200000  | 900000   | 16.76926 |
| Q9CRA5 | Golgi phosphoprotein 3 OS=Mus musculus GN=Golph3 PE=1 SV=1                                               | 5.033557 | 1  | 2  | 1  | 33.731 | 6.44  | 6900000  | 6000000  |          | 6.227347 |
| Q9ERF3 | WD repeat-containing protein 61 OS=Mus musculus GN=Wdr61 PE=1 SV=1                                       | 2.622951 | 1  | 1  | 1  | 33.752 | 5.36  |          | 1400000  |          | 2.013358 |
| P10711 | Transcription elongation factor A protein 1 OS=Mus musculus GN=Tcea1 PE=1 SV=2                           | 25.5814  | 6  | 17 | 6  | 33.859 | 8.38  | 8200000  | 9000000  | 8200000  | 53.33721 |
| O35295 | Transcriptional activator protein Pur-beta OS=Mus musculus GN=Purb PE=1 SV=3                             | 12.03704 | 2  | 8  | 2  | 33.881 | 5.43  | 11000000 | 11000000 | 8200000  | 35.98172 |
| Q8JZU2 | Tricarboxylate transport protein, mitochondrial OS=Mus musculus GN=Slc25a1 PE=1 SV=1                     | 3.536977 | 1  | 1  | 1  | 33.91  | 9.89  |          |          | 320000   | 3.037882 |
| Q99K95 | Protein RTF2 homolog OS=Mus musculus GN=Rtfdc1 PE=1 SV=1                                                 | 3.257329 | 1  | 2  | 1  | 33.913 | 8.81  |          |          |          | 4.726472 |
| Q9D710 | Thioredoxin-related transmembrane protein 2 OS=Mus musculus GN=Tmx2 PE=1 SV=1                            | 7.118644 | 2  | 4  | 2  | 33.921 | 8.75  | 3600000  | 2300000  | 3000000  | 10.7288  |
| Q9WUU7 | Cathepsin Z OS=Mus musculus GN=Ctsz PE=1 SV=1                                                            | 8.169935 | 2  | 5  | 2  | 33.974 | 6.6   | 2200000  | 3900000  | 2100000  | 14.41081 |
| P31230 | Aminoacyl tRNA synthase complex-interacting multifunctional protein 1 OS=Mus musculus GN=Aimp1 PE=1 SV=2 | 26.77419 | 7  | 12 | 7  | 33.976 | 8.35  | 7700000  | 5200000  | 5500000  | 35.98336 |
| Q9QXV9 | Protein sprouty homolog 1 OS=Mus musculus GN=Spry1 PE=2 SV=1                                             | 6.709265 | 2  | 2  | 2  | 33.982 | 8.15  | 540000   |          | 860000   | 4.443645 |
| Q99L04 | Dehydrogenase/reductase SDR family member 1 OS=Mus musculus GN=Dhrs1 PE=1 SV=1                           | 29.07348 | 8  | 20 | 8  | 33.983 | 8.35  | 20000000 | 19000000 | 16000000 | 55.64626 |
| Q62000 | Mimecan OS=Mus musculus GN=Ogn PE=1 SV=1                                                                 | 2.684564 | 1  | 1  | 1  | 33.991 | 5.74  |          |          | 380000   | 2.532214 |
| Q62277 | Synaptophysin OS=Mus musculus GN=Syp PE=1 SV=2                                                           | 9.55414  | 3  | 5  | 3  | 34.002 | 4.94  | 7800000  | 19000000 | 15000000 | 12.08403 |
| Q91YL2 | E3 ubiquitin-protein ligase RNF126 OS=Mus musculus GN=Rnf126 PE=1 SV=1                                   | 5.43131  | 1  | 1  | 1  | 34.059 | 5.17  |          | 770000   |          | 2.843304 |
| Q99KB8 | Hydroxycyglutathione hydrolase, mitochondrial OS=Mus musculus GN=Hagh PE=1 SV=2                          | 12.62136 | 3  | 7  | 3  | 34.062 | 7.75  | 1500000  | 1600000  | 1200000  | 20.08941 |
| P11440 | Cyclin-dependent kinase 1 OS=Mus musculus GN=Cdk1 PE=1 SV=3                                              | 14.14141 | 4  | 11 | 3  | 34.085 | 8.43  | 2500000  | 4000000  | 2200000  | 29.80283 |
| Q9DCN2 | NADH-cytochrome b5 reductase 3 OS=Mus musculus GN=Cyb5r3 PE=1 SV=3                                       | 34.88372 | 8  | 24 | 8  | 34.106 | 8.38  | 19000000 | 17000000 | 14000000 | 71.29315 |
| Q9DB73 | NADH-cytochrome b5 reductase 1 OS=Mus musculus GN=Cyb5r1 PE=1 SV=1                                       | 3.934426 | 1  | 2  | 1  | 34.113 | 8.87  | 1400000  | 1500000  |          | 5.885711 |
| Q9CR62 | Mitochondrial 2-oxoglutarate/malate carrier protein OS=Mus musculus GN=Slc25a11 PE=1 SV=3                | 13.05732 | 4  | 7  | 4  | 34.133 | 9.94  | 1300000  | 2700000  | 7900000  | 17.51794 |
| P70452 | Syntaxin-4 OS=Mus musculus GN=Stx4 PE=1 SV=1                                                             | 13.42282 | 3  | 9  | 3  | 34.144 | 6.14  | 1900000  | 1800000  | 1500000  | 29.23721 |
| Q9DB41 | Mitochondrial glutamate carrier 2 OS=Mus musculus GN=Slc25a18 PE=1 SV=4                                  | 7.1875   | 2  | 5  | 1  | 34.144 | 9.19  |          | 1800000  | 1300000  | 13.30324 |
| P49312 | Heterogeneous nuclear ribonucleoprotein A1 OS=Mus musculus GN=Hnrnpa1 PE=1 SV=2                          | 37.8125  | 11 | 45 | 11 | 34.175 | 9.23  | 91000000 | 67000000 | 69000000 | 154.1413 |
| Q99M28 | RNA-binding protein with serine-rich domain 1 OS=Mus musculus GN=Rnps1 PE=1 SV=1                         | 8.852459 | 2  | 10 | 2  | 34.188 | 11.84 | 17000000 | 17000000 | 17000000 | 31.25995 |
| P14869 | 60S acidic ribosomal protein P0 OS=Mus musculus GN=Rplp0 PE=1 SV=3                                       | 38.17035 | 10 | 34 | 10 | 34.195 | 6.25  | 36000000 | 34000000 | 29000000 | 113.5468 |
| Q9CYG7 | Mitochondrial import receptor subunit TOM34 OS=Mus musculus GN=Tom34 PE=1 SV=1                           | 7.76699  | 2  | 2  | 2  | 34.257 | 9.14  | 39000000 | 610000   |          | 5.120617 |
| P35550 | rRNA 2'-O-methyltransferase fibrillar OS=Mus musculus GN=Fbl PE=1 SV=2                                   | 14.37309 | 4  | 7  | 4  | 34.286 | 10.24 | 12000000 | 2000000  | 12000000 | 17.07733 |
| Q8BJU0 | Small glutamine-rich tetratricopeptide repeat-containing protein alpha OS=Mus musculus GN=Sgta PE=1 SV=2 | 7.936508 | 2  | 3  | 2  | 34.301 | 5.06  | 4100000  | 2200000  |          | 6.314539 |
| Q64444 | Carbonic anhydrase 4 OS=Mus musculus GN=Ca4 PE=1 SV=1                                                    | 4.262295 | 1  | 1  | 1  | 34.33  | 8.21  | 1400000  |          |          | 2.295415 |
| Q9CVB6 | Actin-related protein 2/3 complex subunit 2 OS=Mus musculus GN=Arpc2 PE=1 SV=3                           | 36.33333 | 11 | 26 | 11 | 34.336 | 7.36  | 28000000 | 25000000 | 19000000 | 71.01717 |
| Q9Z204 | Heterogeneous nuclear ribonucleoproteins C1/C2 OS=Mus musculus GN=Hnrnpc PE=1 SV=1                       | 29.39297 | 9  | 28 | 9  | 34.364 | 5.05  | 47000000 | 48000000 | 46000000 | 79.66092 |
| P47962 | 60S ribosomal protein L5 OS=Mus musculus GN=Rpl5 PE=1 SV=3                                               | 35.69024 | 11 | 59 | 11 | 34.379 | 9.77  | 55000000 | 53000000 | 40000000 | 139.3919 |
| Q9DBX2 | Phosducin-like protein OS=Mus musculus GN=Pdcl PE=1 SV=1                                                 | 3.986711 | 1  | 2  | 1  | 34.385 | 4.87  |          |          | 610000   | 5.168906 |
| P55088 | Aquaporin-4 OS=Mus musculus GN=Aqp4 PE=1 SV=2                                                            | 3.095975 | 1  | 1  | 1  | 34.414 | 7.42  | 2800000  |          |          | 2.157353 |
| P07214 | SPARC OS=Mus musculus GN=Sparc PE=1 SV=1                                                                 | 17.21854 | 3  | 4  | 3  | 34.428 | 4.86  | 1400000  | 1200000  | 1500000  | 11.15807 |
| Q8K274 | Ketosamine-3-kinase OS=Mus musculus GN=Fn3krp PE=1 SV=2                                                  | 6.472492 | 1  | 2  | 1  | 34.446 | 7.87  | 1400000  | 1200000  |          | 8.645935 |
| O88531 | Palmitoyl-protein thioesterase 1 OS=Mus musculus GN=Ppt1 PE=1 SV=2                                       | 4.901961 | 1  | 3  | 1  | 34.467 | 8     | 5300000  | 4500000  | 3000000  | 10.80781 |
| Q9E574 | Serine/threonine-protein kinase Nek7 OS=Mus musculus GN=Nek7 PE=1 SV=1                                   | 8.609272 | 3  | 4  | 3  | 34.514 | 8.25  | 1300000  |          | 860000   | 10.01043 |
| O89079 | Coatmer subunit epsilon OS=Mus musculus GN=Cope PE=1 SV=3                                                | 21.42857 | 5  | 11 | 5  | 34.545 | 5.06  | 1700000  | 2600000  | 3500000  | 33.60771 |
| O35593 | 26S proteasome non-ATPase regulatory subunit 14 OS=Mus musculus GN=Psm14 PE=1 SV=2                       | 2.903226 | 1  | 1  | 1  | 34.555 | 6.52  |          |          |          | 2.060246 |
| Q9D6M3 | Mitochondrial glutamate carrier 1 OS=Mus musculus GN=Slc25a22 PE=1 SV=1                                  | 9.287926 | 3  | 7  | 2  | 34.648 | 9.09  | 2500000  | 2500000  | 2400000  | 19.99547 |
| Q9D903 | Probable rRNA-processing protein EBP2 OS=Mus musculus GN=Ebna1bp2 PE=2 SV=1                              | 19.28105 | 5  | 12 | 5  | 34.681 | 10.08 | 5500000  | 6500000  | 7400000  | 30.54324 |
| Q9CWZ7 | Gamma-soluble NSF attachment protein OS=Mus musculus GN=Napg PE=1 SV=1                                   | 11.53846 | 3  | 7  | 3  | 34.71  | 5.41  | 6600000  | 6000000  | 5100000  | 19.30227 |
| O70503 | Very-long-chain 3-oxoacyl-CoA reductase OS=Mus musculus GN=Hsd17b12 PE=1 SV=1                            | 13.46154 | 4  | 10 | 4  | 34.719 | 9.52  | 12000000 | 7700000  | 9200000  | 29.79081 |
| Q9CS42 | Ribose-phosphate pyrophosphokinase 2 OS=Mus musculus GN=Prps2 PE=1 SV=4                                  | 4.716981 | 1  | 2  | 1  | 34.764 | 6.61  | 1000000  | 1400000  |          | 6.916173 |
| P52875 | Transmembrane protein 165 OS=Mus musculus GN=Tmem165 PE=1 SV=2                                           | 18.88545 | 3  | 7  | 3  | 34.768 | 7.46  | 2300000  | 2200000  | 1500000  | 26.95092 |
| Q61176 | Arginase-1 OS=Mus musculus GN=Arg1 PE=1 SV=1                                                             | 2.47678  | 1  | 1  | 1  | 34.786 | 7.01  |          |          | 680000   | 1.928875 |

|        |                                                                                                             |          |    |    |    |        |       |          |          |          |  |          |
|--------|-------------------------------------------------------------------------------------------------------------|----------|----|----|----|--------|-------|----------|----------|----------|--|----------|
| P31996 | Macrosialin OS=Mus musculus GN=Cd68 PE=1 SV=1                                                               | 2.760736 | 1  | 1  | 1  | 34.796 | 8.85  | 2800000  |          |          |  | 1.904014 |
| Q9D7G0 | Ribose-phosphate pyrophosphokinase 1 OS=Mus musculus GN=Prps1 PE=1 SV=4                                     | 8.805031 | 2  | 6  | 2  | 34.812 | 6.98  | 1500000  | 1400000  | 1100000  |  | 14.87035 |
| Q9D8B7 | Junctional adhesion molecule C OS=Mus musculus GN=Jam3 PE=1 SV=2                                            | 10.32258 | 2  | 5  | 2  | 34.816 | 7.03  | 4100000  | 3400000  | 3000000  |  | 18.01337 |
| Q922Q8 | Leucine-rich repeat-containing protein 59 OS=Mus musculus GN=Lrrc59 PE=1 SV=1                               | 18.89251 | 5  | 15 | 5  | 34.856 | 9.52  | 17000000 | 20000000 | 16000000 |  | 46.37577 |
| P42669 | Transcriptional activator protein Pur-alpha OS=Mus musculus GN=Pura PE=1 SV=1                               | 21.49533 | 4  | 8  | 4  | 34.862 | 6.44  | 4200000  | 3000000  | 4000000  |  | 26.05562 |
| Q8C4Q6 | Axin interactor, dorsalization-associated protein OS=Mus musculus GN=Aida PE=1 SV=1                         | 5.901639 | 1  | 3  | 1  | 34.866 | 6.74  | 830000   | 780000   | 600000   |  | 11.349   |
| Q9WUD1 | STIP1 homology and U box-containing protein 1 OS=Mus musculus GN=Stub1 PE=1 SV=1                            | 4.934211 | 1  | 1  | 1  | 34.887 | 6.01  |          | 520000   |          |  | 2.67325  |
| Q9CRD2 | ER membrane protein complex subunit 2 OS=Mus musculus GN=Emc2 PE=1 SV=1                                     | 3.367003 | 1  | 3  | 1  | 34.912 | 6.81  | 4400000  | 4200000  | 3600000  |  | 8.949343 |
| Q8C9E8 | Protein FAM26F OS=Mus musculus GN=Fam26f PE=2 SV=1                                                          | 2.236422 | 1  | 3  | 1  | 34.933 | 8.28  | 1500000  | 1400000  | 1500000  |  | 6.712953 |
| Q99I47 | Dehydrogenase/reductase SDR family member 7B OS=Mus musculus GN=Dhrs7b PE=1 SV=1                            | 4.643963 | 1  | 2  | 1  | 34.964 | 9.63  |          |          | 1700000  |  | 6.786398 |
| Q9JJZ4 | Ubiquitin-conjugating enzyme E2 J1 OS=Mus musculus GN=Ube2j1 PE=1 SV=2                                      | 9.119497 | 2  | 6  | 2  | 34.968 | 6.99  | 2500000  | 2700000  | 2500000  |  | 20.13021 |
| Q99LC5 | Electron transfer flavoprotein subunit alpha, mitochondrial OS=Mus musculus GN=Etfa PE=1 SV=2               | 9.309309 | 2  | 3  | 2  | 34.988 | 8.38  | 1600000  | 2700000  |          |  | 10.03134 |
| P68040 | Receptor of activated protein C kinase 1 OS=Mus musculus GN=Rack1 PE=1 SV=3                                 | 41.95584 | 11 | 41 | 11 | 35.055 | 7.69  | 53000000 | 52000000 | 53000000 |  | 123.539  |
| P97470 | Serine/threonine-protein phosphatase 4 catalytic subunit OS=Mus musculus GN=Ppp4c PE=1 SV=2                 | 4.234528 | 1  | 2  | 1  | 35.057 | 5.06  |          | 1300000  | 950000   |  | 5.42897  |
| Q8K1Z0 | Ubiquinone biosynthesis protein COQ9, mitochondrial OS=Mus musculus GN=Coq9 PE=1 SV=1                       | 6.709265 | 1  | 1  | 1  | 35.061 | 5.92  | 2100000  |          |          |  | 5.411795 |
| Q9QYF1 | Retinol dehydrogenase 11 OS=Mus musculus GN=Rdh11 PE=1 SV=2                                                 | 7.594937 | 2  | 4  | 2  | 35.125 | 8.91  | 1400000  | 890000   | 1100000  |  | 11.56128 |
| Q9CQR6 | Serine/threonine-protein phosphatase 6 catalytic subunit OS=Mus musculus GN=Ppp6c PE=1 SV=1                 | 8.196721 | 2  | 4  | 2  | 35.136 | 5.69  | 1200000  | 810000   | 670000   |  | 9.619712 |
| P14094 | Sodium/potassium-transporting ATPase subunit beta-1 OS=Mus musculus GN=Atp1b1 PE=1 SV=1                     | 26.64474 | 7  | 26 | 7  | 35.172 | 8.65  | 63000000 | 25000000 | 24000000 |  | 77.08927 |
| Q99JY8 | Phospholipid phosphatase 3 OS=Mus musculus GN=Ppp3 PE=1 SV=1                                                | 6.730769 | 2  | 4  | 2  | 35.193 | 9.07  | 2900000  | 2000000  | 2300000  |  | 9.426414 |
| O35309 | N-myc-interactor OS=Mus musculus GN=Nmi PE=1 SV=1                                                           | 14.64968 | 4  | 10 | 4  | 35.213 | 5.05  | 2800000  | 3100000  | 2400000  |  | 30.13491 |
| Q8K097 | Protein lifeguard 2 OS=Mus musculus GN=Faim2 PE=2 SV=1                                                      | 6.940063 | 1  | 1  | 1  | 35.235 | 6.92  | 1300000  |          |          |  | 2.844512 |
| P47199 | Quinone oxidoreductase OS=Mus musculus GN=Cryz PE=1 SV=1                                                    | 4.229607 | 1  | 1  | 1  | 35.246 | 8.07  |          | 520000   |          |  | 2.855765 |
| O35682 | Myeloid-associated differentiation marker OS=Mus musculus GN=Myadm PE=1 SV=2                                | 5.3125   | 1  | 1  | 1  | 35.261 | 8.31  | 2300000  |          |          |  | 4.695815 |
| Q922B1 | O-acetyl-ADP-ribose deacetylase MACROD1 OS=Mus musculus GN=MacroD1 PE=1 SV=2                                | 3.405573 | 1  | 1  | 1  | 35.272 | 8.85  |          |          | 670000   |  | 2.475086 |
| Q810U5 | Coiled-coil domain-containing protein 50 OS=Mus musculus GN=Ccdc50 PE=1 SV=1                                | 7.540984 | 2  | 3  | 2  | 35.3   | 6.89  | 1400000  | 750000   | 920000   |  | 8.037574 |
| Q9D0M3 | Cytochrome c1, heme protein, mitochondrial OS=Mus musculus GN=Cyc1 PE=1 SV=1                                | 23.69231 | 6  | 23 | 6  | 35.305 | 9.16  | 5800000  | 5200000  | 4900000  |  | 54.59193 |
| Q9CZR8 | Elongation factor Ts, mitochondrial OS=Mus musculus GN=Tsfm PE=1 SV=1                                       | 6.790123 | 2  | 3  | 2  | 35.312 | 7.06  | 6700000  | 670000   | 1000000  |  | 6.098416 |
| Q9JJ80 | Ribosome production factor 2 homolog OS=Mus musculus GN=Rpf2 PE=2 SV=2                                      | 11.76471 | 3  | 8  | 3  | 35.341 | 10.04 | 2700000  | 3200000  | 2800000  |  | 21.42598 |
| Q8R010 | Aminoacyl tRNA synthase complex-interacting multifunctional protein 2 OS=Mus musculus GN=Aimp2 PE=1 SV=2    | 5.3125   | 1  | 3  | 1  | 35.355 | 7.83  | 1200000  | 1000000  | 970000   |  | 10.17274 |
| Q91V61 | Sideroflexin-3 OS=Mus musculus GN=Sfxn3 PE=1 SV=1                                                           | 25.8567  | 6  | 14 | 5  | 35.384 | 9.51  | 6800000  | 5500000  | 4600000  |  | 44.0347  |
| Q9D0Q7 | 39S ribosomal protein L45, mitochondrial OS=Mus musculus GN=Mrpl45 PE=1 SV=1                                | 3.267974 | 1  | 2  | 1  | 35.388 | 9.23  | 1200000  | 880000   |          |  | 5.095431 |
| P35456 | Urokinase plasminogen activator surface receptor OS=Mus musculus GN=Plaur PE=1 SV=1                         | 4.892966 | 1  | 1  | 1  | 35.405 | 6.83  |          | 370000   |          |  | 1.897521 |
| P28352 | DNA-(apurinic or apyrimidinic site) lyase OS=Mus musculus GN=Apex1 PE=1 SV=2                                | 14.19558 | 3  | 8  | 3  | 35.468 | 7.91  | 8900000  | 8200000  | 11000000 |  | 28.8497  |
| Q9D1M0 | Protein SEC13 homolog OS=Mus musculus GN=Sec13 PE=1 SV=3                                                    | 8.074534 | 2  | 6  | 2  | 35.543 | 5.38  | 4700000  | 4100000  | 4100000  |  | 19.34387 |
| Q922H9 | Zinc finger protein 330 OS=Mus musculus GN=Znf330 PE=1 SV=1                                                 | 5.379747 | 1  | 1  | 1  | 35.584 | 6.16  |          | 2100000  |          |  | 3.777232 |
| P63330 | Serine/threonine-protein phosphatase 2A catalytic subunit alpha isoform OS=Mus musculus GN=Ppp2ca PE=1 SV=1 | 26.86084 | 6  | 21 | 6  | 35.585 | 5.54  | 8800000  | 7000000  | 6000000  |  | 79.60307 |
| P08249 | Malate dehydrogenase, mitochondrial OS=Mus musculus GN=Mdh2 PE=1 SV=3                                       | 16.56805 | 5  | 12 | 5  | 35.589 | 8.68  | 10000000 | 8300000  | 7000000  |  | 32.7856  |
| P47802 | Metaxin-1 OS=Mus musculus GN=Mtx1 PE=1 SV=1                                                                 | 9.148265 | 2  | 7  | 2  | 35.601 | 6.18  | 1400000  | 1800000  | 1400000  |  | 22.15766 |
| Q9Z1D1 | Eukaryotic translation initiation factor 3 subunit G OS=Mus musculus GN=Eif3g PE=1 SV=2                     | 15.3125  | 4  | 17 | 4  | 35.616 | 5.9   | 16000000 | 14000000 | 13000000 |  | 53.35665 |
| Q99JR1 | Sideroflexin-1 OS=Mus musculus GN=Sfxn1 PE=1 SV=3                                                           | 10.55901 | 3  | 6  | 2  | 35.626 | 9.23  | 4300000  | 4300000  | 3600000  |  | 16.67379 |
| Q9DB96 | Neuroguidin OS=Mus musculus GN=Ngdn PE=1 SV=1                                                               | 4.444444 | 1  | 2  | 1  | 35.637 | 9.58  |          | 1700000  | 1800000  |  | 5.866894 |
| P62960 | Nuclease-sensitive element-binding protein 1 OS=Mus musculus GN=Ybx1 PE=1 SV=3                              | 47.82609 | 11 | 61 | 8  | 35.709 | 9.88  | 27000000 | 24000000 | 25000000 |  | 196.0217 |
| O70252 | Heme oxygenase 2 OS=Mus musculus GN=Hmox2 PE=1 SV=1                                                         | 10.15873 | 3  | 10 | 3  | 35.716 | 5.87  | 3800000  | 3400000  | 3000000  |  | 24.43631 |
| P48036 | Annexin A5 OS=Mus musculus GN=Anxa5 PE=1 SV=1                                                               | 39.81191 | 12 | 32 | 12 | 35.73  | 4.96  | 23000000 | 17000000 | 17000000 |  | 96.00951 |
| P09450 | Transcription factor jun-B OS=Mus musculus GN=Junb PE=1 SV=1                                                | 7.267442 | 1  | 1  | 1  | 35.743 | 9.22  |          | 290000   |          |  | 2.860577 |
| O70400 | PDZ and LIM domain protein 1 OS=Mus musculus GN=Pdlim1 PE=1 SV=4                                            | 11.92661 | 2  | 2  | 2  | 35.752 | 6.84  |          | 2900000  |          |  | 5.313521 |
| P16858 | Glyceraldehyde-3-phosphate dehydrogenase OS=Mus musculus GN=Gapdh PE=1 SV=2                                 | 44.74474 | 11 | 56 | 11 | 35.787 | 8.25  | 1.8E+08  | 1.5E+08  | 1.4E+08  |  | 198.6539 |
| P51949 | CDK-activating kinase assembly factor MAT1 OS=Mus musculus GN=Mnat1 PE=1 SV=2                               | 4.20712  | 1  | 1  | 1  | 35.825 | 5.82  | 130000   |          |          |  | 2.088196 |
| Q9DCJ1 | Target of rapamycin complex subunit LST8 OS=Mus musculus GN=Mlst8 PE=1 SV=1                                 | 5.521472 | 1  | 1  | 1  | 35.828 | 5.86  |          |          | 290000   |  | 2.628762 |
| P08226 | Apolipoprotein E OS=Mus musculus GN=Apoe PE=1 SV=2                                                          | 28.29582 | 7  | 20 | 7  | 35.844 | 5.68  | 11000000 | 12000000 | 6000000  |  | 57.42241 |
| O88545 | COP9 signalosome complex subunit 6 OS=Mus musculus GN=Cops6 PE=1 SV=1                                       | 4.62963  | 1  | 2  | 1  | 35.857 | 5.73  | 1700000  |          | 790000   |  | 4.140566 |
| Q6WVG3 | BTB/POZ domain-containing protein KCTD12 OS=Mus musculus GN=Kctd12 PE=1 SV=1                                | 16.81957 | 4  | 8  | 4  | 35.87  | 5.81  | 3700000  | 2100000  | 2300000  |  | 26.45987 |
| Q9JJ00 | Phospholipid scramblase 1 OS=Mus musculus GN=Plscr1 PE=1 SV=1                                               | 7.012195 | 2  | 4  | 2  | 35.89  | 5.06  | 1200000  | 3700000  | 1900000  |  | 9.990509 |



|        |                                                                                                          |          |    |    |    |        |       |          |          |          |          |
|--------|----------------------------------------------------------------------------------------------------------|----------|----|----|----|--------|-------|----------|----------|----------|----------|
| P97429 | Annexin A4 OS=Mus musculus GN=Anxa4 PE=1 SV=4                                                            | 37.93103 | 11 | 30 | 10 | 35.893 | 5.57  | 17000000 | 14000000 | 11000000 | 98.00572 |
| E9PUL5 | Proline-rich transmembrane protein 2 OS=Mus musculus GN=Prtr2 PE=1 SV=1                                  | 32.36994 | 4  | 11 | 4  | 35.902 | 4.63  | 4300000  | 3000000  | 2300000  | 41.14694 |
| Q80WW9 | DDR GK domain-containing protein 1 OS=Mus musculus GN=DdrGk1 PE=1 SV=2                                   | 3.174603 | 1  | 1  | 1  | 35.956 | 5.35  |          | 2500000  |          | 2.019623 |
| P10518 | Delta-aminolevulinic acid dehydratase OS=Mus musculus GN=Alad PE=1 SV=1                                  | 5.757576 | 1  | 1  | 1  | 36     | 6.79  | 400000   |          |          | 3.042962 |
| Q9CY27 | Very-long-chain enoyl-CoA reductase OS=Mus musculus GN=Tecr PE=1 SV=1                                    | 5.844156 | 2  | 6  | 2  | 36.067 | 9.55  | 10000000 | 9100000  | 7400000  | 13.05374 |
| Q6ZWX6 | Eukaryotic translation initiation factor 2 subunit 1 OS=Mus musculus GN=Eif2s1 PE=1 SV=3                 | 33.33333 | 9  | 30 | 9  | 36.085 | 5.08  | 15000000 | 14000000 | 13000000 | 87.6959  |
| O35459 | Delta(3,5)-Delta(2,4)-dienoyl-CoA isomerase, mitochondrial OS=Mus musculus GN=Ech1 PE=1 SV=1             | 7.95107  | 2  | 3  | 2  | 36.095 | 7.71  | 880000   | 460000   | 370000   | 6.809618 |
| Q920G0 | PDZ domain-containing protein GIPC1 OS=Mus musculus GN=Gipc1 PE=1 SV=1                                   | 4.204204 | 1  | 3  | 1  | 36.107 | 5.91  | 820000   | 1000000  | 500000   | 8.367893 |
| Q925N2 | Sideroflexin-2 OS=Mus musculus GN=Sfxn2 PE=1 SV=1                                                        | 7.763975 | 1  | 1  | 1  | 36.117 | 8.82  |          | 2300000  |          | 2.409861 |
| Q9WUM5 | Succinate--CoA ligase [ADP/GDP-forming] subunit alpha, mitochondrial OS=Mus musculus GN=Suclg1 PE=1 SV=4 | 4.33526  | 1  | 2  | 1  | 36.132 | 9.39  | 4500000  | 4300000  |          | 5.804232 |
| P70372 | ELAV-like protein 1 OS=Mus musculus GN=Elavl1 PE=1 SV=2                                                  | 21.16564 | 5  | 11 | 5  | 36.146 | 9.04  | 12000000 | 8500000  | 14000000 | 31.03774 |
| P35803 | Neuronal membrane glycoprotein M6-b OS=Mus musculus GN=Gpm6b PE=1 SV=2                                   | 3.353659 | 1  | 3  | 1  | 36.186 | 6.14  | 9900000  | 5400000  | 4500000  | 9.768085 |
| Q91VE6 | MKI67 FHA domain-interacting nucleolar phosphoprotein OS=Mus musculus GN=Nifk PE=1 SV=1                  | 14.8265  | 3  | 8  | 3  | 36.242 | 10.24 | 1900000  | 1500000  | 1400000  | 25.2349  |
| O55091 | Protein IMPACT OS=Mus musculus GN=Impact PE=1 SV=2                                                       | 3.459119 | 1  | 3  | 1  | 36.253 | 5.05  | 1900000  | 2400000  | 6900000  | 6.149927 |
| Q9ERI6 | Retinol dehydrogenase 14 OS=Mus musculus GN=Rdh14 PE=1 SV=1                                              | 7.48503  | 2  | 3  | 2  | 36.343 | 8.18  | 560000   |          | 410000   | 6.176892 |
| O35639 | Annexin A3 OS=Mus musculus GN=Anxa3 PE=1 SV=4                                                            | 11.45511 | 3  | 8  | 3  | 36.362 | 5.76  | 1800000  | 1700000  | 1300000  | 21.79433 |
| Q9DAW9 | Calponin-3 OS=Mus musculus GN=Cnn3 PE=1 SV=1                                                             | 30.30303 | 8  | 18 | 7  | 36.406 | 5.72  | 8600000  | 4900000  | 6500000  | 50.28578 |
| Q9QZD9 | Eukaryotic translation initiation factor 3 subunit I OS=Mus musculus GN=Eif3i PE=1 SV=1                  | 27.07692 | 8  | 22 | 8  | 36.438 | 5.64  | 12000000 | 11000000 | 10000000 | 63.53778 |
| Q8CEE7 | Retinol dehydrogenase 13 OS=Mus musculus GN=Rdh13 PE=1 SV=1                                              | 3.892216 | 1  | 3  | 1  | 36.441 | 8.85  | 920000   | 940000   | 610000   | 7.220531 |
| Q9ERN0 | Secretory carrier-associated membrane protein 2 OS=Mus musculus GN=Scamp2 PE=1 SV=1                      | 3.647416 | 1  | 1  | 1  | 36.441 | 6.32  |          | 3000000  |          | 3.139907 |
| P06151 | L-lactate dehydrogenase A chain OS=Mus musculus GN=Ldha PE=1 SV=3                                        | 23.79518 | 7  | 25 | 6  | 36.475 | 7.74  | 19000000 | 25000000 | 14000000 | 74.10563 |
| P14152 | Malate dehydrogenase, cytoplasmic OS=Mus musculus GN=Mdh1 PE=1 SV=3                                      | 24.8503  | 8  | 20 | 8  | 36.488 | 6.58  | 21000000 | 21000000 | 21000000 | 53.85393 |
| P26516 | 26S proteasome non-ATPase regulatory subunit 7 OS=Mus musculus GN=Psm7 PE=1 SV=2                         | 13.70717 | 3  | 8  | 3  | 36.517 | 6.77  | 4000000  | 4400000  | 3300000  | 22.68604 |
| P16125 | L-lactate dehydrogenase B chain OS=Mus musculus GN=Ldhb PE=1 SV=2                                        | 24.2515  | 7  | 15 | 6  | 36.549 | 6.05  | 17000000 | 13000000 | 14000000 | 48.4845  |
| Q9JUI6 | Alcohol dehydrogenase [NADP(+)] OS=Mus musculus GN=Akr1a1 PE=1 SV=3                                      | 19.38462 | 5  | 11 | 5  | 36.564 | 7.39  | 5100000  | 4100000  | 3000000  | 32.19096 |
| P61965 | WD repeat-containing protein 5 OS=Mus musculus GN=Wdr5 PE=1 SV=1                                         | 4.491018 | 1  | 1  | 1  | 36.565 | 8.27  |          | 840000   |          | 2.68865  |
| P01864 | Ig gamma-2A chain C region secreted form OS=Mus musculus PE=1 SV=1                                       | 9.850746 | 2  | 8  | 2  | 36.573 | 8.22  | 3500000  | 2700000  | 2300000  | 24.37089 |
| P08101 | Low affinity immunoglobulin gamma Fc region receptor II OS=Mus musculus GN=Fcgr2 PE=1 SV=2               | 5.151515 | 1  | 3  | 1  | 36.673 | 6.73  | 4400000  | 5800000  | 2400000  | 10.25098 |
| P25916 | Polycomb complex protein BMI-1 OS=Mus musculus GN=Bmi1 PE=1 SV=1                                         | 13.58025 | 2  | 3  | 2  | 36.684 | 8.65  | 1800000  | 1100000  |          | 7.841833 |
| P58389 | Serine/threonine-protein phosphatase 2A activator OS=Mus musculus GN=Ppp2r4 PE=1 SV=1                    | 4.024768 | 1  | 1  | 1  | 36.687 | 6.39  |          | 2000000  |          | 3.128493 |
| Q6SJQ7 | CMRF35-like molecule 1 OS=Mus musculus GN=Cd300lf PE=1 SV=1                                              | 3.857567 | 1  | 1  | 1  | 36.691 | 5.29  | 1100000  |          |          | 2.33559  |
| P19973 | Lymphocyte-specific protein 1 OS=Mus musculus GN=Lsp1 PE=1 SV=2                                          | 36.06061 | 7  | 16 | 7  | 36.692 | 4.82  | 5400000  | 5100000  | 2400000  | 55.35267 |
| Q9CWU9 | Nucleoporin Nup37 OS=Mus musculus GN=Nup37 PE=1 SV=2                                                     | 4.601227 | 1  | 1  | 1  | 36.708 | 6.09  | 1000000  |          |          | 3.505811 |
| Q921M7 | Protein FAM49B OS=Mus musculus GN=Fam49b PE=1 SV=1                                                       | 16.97531 | 4  | 10 | 3  | 36.753 | 6.06  | 1900000  | 1500000  | 1600000  | 28.37868 |
| Q9DB25 | Dolichyl-phosphate beta-glucosyltransferase OS=Mus musculus GN=Alg5 PE=1 SV=1                            | 3.703704 | 1  | 3  | 1  | 36.767 | 8.6   | 5400000  | 5900000  | 6200000  | 8.906664 |
| P01878 | Ig alpha chain C region OS=Mus musculus PE=1 SV=1                                                        | 4.360465 | 1  | 4  | 1  | 36.852 | 5.06  | 3900000  | 2900000  |          | 13.87075 |
| Q9CSU0 | Regulation of nuclear pre-mRNA domain-containing protein 1B OS=Mus musculus GN=Rprd1b PE=1 SV=2          | 4.907975 | 1  | 1  | 1  | 36.861 | 5.97  |          |          | 2500000  | 3.108315 |
| Q920Q6 | RNA-binding protein Musashi homolog 2 OS=Mus musculus GN=Msi2 PE=1 SV=1                                  | 2.890173 | 1  | 3  | 1  | 36.915 | 8.47  | 2400000  | 1700000  | 1800000  | 8.66397  |
| Q9WVA3 | Mitotic checkpoint protein BUB3 OS=Mus musculus GN=Bub3 PE=1 SV=2                                        | 27.91411 | 7  | 17 | 7  | 36.931 | 6.84  | 12000000 | 6700000  | 7500000  | 49.78278 |
| P63087 | Serine/threonine-protein phosphatase PP1-gamma catalytic subunit OS=Mus musculus GN=Ppp1cc PE=1 SV=1     | 6.19195  | 2  | 6  | 2  | 36.96  | 6.54  | 4000000  | 3600000  | 3300000  | 14.89418 |
| O35887 | Calumenin OS=Mus musculus GN=Calu PE=1 SV=1                                                              | 44.7619  | 11 | 43 | 11 | 37.041 | 4.67  | 29000000 | 27000000 | 28000000 | 127.0922 |
| P21995 | Embigin OS=Mus musculus GN=Emb PE=1 SV=2                                                                 | 6.666667 | 2  | 2  | 2  | 37.041 | 6.02  | 440000   | 2900000  |          | 4.947199 |
| Q8C0L0 | Thioredoxin-related transmembrane protein 4 OS=Mus musculus GN=Tmx4 PE=1 SV=2                            | 3.58209  | 1  | 3  | 1  | 37.108 | 4.37  | 2200000  | 2100000  | 2300000  | 7.990436 |
| P62141 | Serine/threonine-protein phosphatase PP1-beta catalytic subunit OS=Mus musculus GN=Ppp1cb PE=1 SV=3      | 6.116208 | 2  | 5  | 1  | 37.163 | 6.19  | 4600000  |          | 5900000  | 11.8654  |
| Q99JW4 | LIM and senescent cell antigen-like-containing domain protein 1 OS=Mus musculus GN=Lims1 PE=1 SV=3       | 8.307692 | 2  | 2  | 2  | 37.215 | 8.05  | 1900000  | 2200000  |          | 2.102888 |
| Q9D020 | Cytosolic 5'-nucleotidase 3A OS=Mus musculus GN=Nt5c3a PE=1 SV=4                                         | 7.55287  | 2  | 4  | 2  | 37.228 | 6.65  | 1200000  | 1800000  | 1600000  | 13.31387 |
| Q8BP92 | Reticulocalbin-2 OS=Mus musculus GN=Rcn2 PE=1 SV=1                                                       | 4.6875   | 1  | 1  | 1  | 37.248 | 4.42  |          |          | 2500000  | 2.314611 |
| Q91VC9 | Growth hormone-inducible transmembrane protein OS=Mus musculus GN=Ghitm PE=1 SV=1                        | 3.179191 | 1  | 2  | 1  | 37.25  | 9.8   | 1000000  | 740000   |          | 5.224179 |
| P10605 | Cathepsin B OS=Mus musculus GN=Ctsb PE=1 SV=2                                                            | 14.45428 | 4  | 18 | 4  | 37.256 | 5.91  | 11000000 | 7500000  | 7700000  | 48.20756 |
| Q5U4D9 | THO complex subunit 6 homolog OS=Mus musculus GN=Thoc6 PE=1 SV=1                                         | 3.225806 | 1  | 1  | 1  | 37.291 | 7.12  | 280000   |          |          | 2.494646 |
| O88736 | 3-keto-steroid reductase OS=Mus musculus GN=Hsd17b7 PE=1 SV=1                                            | 2.994012 | 1  | 1  | 1  | 37.293 | 6.73  |          |          | 510000   | 1.928748 |
| P29699 | Alpha-2-HS-glycoprotein OS=Mus musculus GN=Ahsg PE=1 SV=1                                                | 11.01449 | 2  | 2  | 2  | 37.302 | 6.51  |          | 1000000  |          | 9.39505  |
| P62880 | Guanine nucleotide-binding protein G(I)/G(S)/G(T) subunit beta-2 OS=Mus musculus GN=Gnb2 PE=1 SV=3       | 17.64706 | 5  | 16 | 2  | 37.307 | 6     | 21000000 | 10000000 | 14000000 | 52.01389 |



|        |                                                                                                      |          |    |     |    |        |       |          |          |          |  |          |
|--------|------------------------------------------------------------------------------------------------------|----------|----|-----|----|--------|-------|----------|----------|----------|--|----------|
| Q9CX10 | 2-methoxy-6-polyprenyl-1,4-benzoquinol methylase, mitochondrial OS=Mus musculus GN=Coq5 PE=1 SV=2    | 3.669725 | 1  | 1   | 1  | 37.312 | 7.49  | 890000   |          |          |  | 2.784724 |
| Q8BH20 | Protein FAM49A OS=Mus musculus GN=Fam49a PE=1 SV=1                                                   | 7.120743 | 2  | 4   | 1  | 37.319 | 6.01  |          | 1100000  | 720000   |  | 10.0688  |
| Q9R020 | Zinc finger Ran-binding domain-containing protein 2 OS=Mus musculus GN=Zranb2 PE=1 SV=2              | 14.54545 | 4  | 9   | 4  | 37.328 | 9.89  | 5500000  | 5900000  | 4400000  |  | 25.46718 |
| Q8BVA5 | Lipid droplet-associated hydrolase OS=Mus musculus GN=Ldah PE=1 SV=1                                 | 3.98773  | 1  | 1   | 1  | 37.349 | 8.28  |          | 2600000  |          |  | 2.13082  |
| P62874 | Guanine nucleotide-binding protein G(I)/G(S)/G(T) subunit beta-1 OS=Mus musculus GN=Gnb1 PE=1 SV=3   | 21.47059 | 6  | 19  | 3  | 37.353 | 6     | 20000000 | 11000000 | 13000000 |  | 59.21294 |
| Q18P16 | SLAM family member 5 OS=Mus musculus GN=Cd84 PE=1 SV=1                                               | 3.647416 | 1  | 1   | 1  | 37.354 | 7.36  |          | 1000000  |          |  | 2.131004 |
| P29387 | Guanine nucleotide-binding protein subunit beta-4 OS=Mus musculus GN=Gnb4 PE=1 SV=4                  | 12.35294 | 3  | 5   | 2  | 37.355 | 6.16  | 400000   |          |          |  | 13.30793 |
| Q93092 | Transaldolase OS=Mus musculus GN=Taldo1 PE=1 SV=2                                                    | 6.824926 | 2  | 3   | 2  | 37.363 | 7.03  | 2200000  | 1200000  |          |  | 8.020023 |
| O88569 | Heterogeneous nuclear ribonucleoproteins A2/B1 OS=Mus musculus GN=Hnrnpa2b1 PE=1 SV=2                | 59.2068  | 21 | 135 | 21 | 37.38  | 8.95  | 2.3E+08  | 1.8E+08  | 2E+08    |  | 426.9259 |
| P14430 | H-2 class I histocompatibility antigen, Q8 alpha chain OS=Mus musculus GN=H2-Q8 PE=3 SV=1            | 20.55215 | 7  | 34  | 1  | 37.387 | 5.94  |          |          |          |  | 98.4491  |
| Q4FK66 | Pre-mRNA-splicing factor 38A OS=Mus musculus GN=Prpf38a PE=1 SV=1                                    | 11.53846 | 3  | 8   | 3  | 37.413 | 10.01 | 1800000  | 1700000  | 3600000  |  | 22.15296 |
| P60335 | Poly(rC)-binding protein 1 OS=Mus musculus GN=Pcbp1 PE=1 SV=1                                        | 27.24719 | 8  | 22  | 4  | 37.474 | 7.09  | 6000000  | 4200000  | 6900000  |  | 63.90648 |
| Q8R0F5 | RNA-binding motif protein, X-linked 2 OS=Mus musculus GN=Rbmx2 PE=1 SV=1                             | 3.98773  | 1  | 1   | 1  | 37.513 | 9.72  | 540000   |          |          |  | 3.078701 |
| P62137 | Serine/threonine-protein phosphatase PP1-alpha catalytic subunit OS=Mus musculus GN=Ppp1ca PE=1 SV=1 | 6.060606 | 2  | 4   | 1  | 37.516 | 6.33  |          | 5200000  |          |  | 9.604762 |
| Q99N96 | 39S ribosomal protein L1, mitochondrial OS=Mus musculus GN=Mrpl1 PE=1 SV=2                           | 4.761905 | 1  | 4   | 1  | 37.573 | 8.72  | 1100000  | 660000   | 740000   |  | 10.52786 |
| Q9ERD8 | Gamma-parvin OS=Mus musculus GN=Parvg PE=1 SV=2                                                      | 6.344411 | 2  | 3   | 2  | 37.58  | 5.66  | 1800000  | 1800000  |          |  | 7.484401 |
| O08915 | AH receptor-interacting protein OS=Mus musculus GN=Aip PE=1 SV=1                                     | 10.30303 | 2  | 5   | 2  | 37.581 | 6.4   | 1500000  | 920000   | 880000   |  | 15.06855 |
| Q9WUP7 | Ubiquitin carboxyl-terminal hydrolase isozyme L5 OS=Mus musculus GN=Uchl5 PE=1 SV=2                  | 16.10942 | 4  | 10  | 4  | 37.593 | 5.33  | 2100000  | 1800000  | 1000000  |  | 25.52194 |
| Q9CQJ4 | E3 ubiquitin-protein ligase RING2 OS=Mus musculus GN=Rnf2 PE=1 SV=1                                  | 7.738095 | 2  | 5   | 2  | 37.6   | 6.84  | 1400000  | 1500000  | 1200000  |  | 12.79556 |
| Q9QYS9 | Protein quaking OS=Mus musculus GN=Qki PE=1 SV=1                                                     | 12.90323 | 4  | 11  | 4  | 37.647 | 8.56  | 7100000  | 4900000  | 5600000  |  | 26.83741 |
| Q9CQW3 | CD2 antigen cytoplasmic tail-binding protein 2 OS=Mus musculus GN=Cd2bp2 PE=1 SV=1                   | 7.017544 | 2  | 4   | 2  | 37.671 | 4.6   | 1800000  | 2200000  | 1600000  |  | 10.63281 |
| Q6PIU9 | Uncharacterized protein FLJ45252 homolog OS=Mus musculus PE=1 SV=2                                   | 16.66667 | 4  | 8   | 4  | 37.681 | 5.07  | 1600000  | 2200000  | 1800000  |  | 25.68249 |
| A6H5X4 | PHD finger protein 11 OS=Mus musculus GN=Phf11 PE=2 SV=1                                             | 15.727   | 3  | 18  | 3  | 37.704 | 6.07  | 6300000  | 6600000  | 3500000  |  | 69.81184 |
| Q8K221 | Arfaptin-2 OS=Mus musculus GN=Arfp2 PE=1 SV=2                                                        | 7.331378 | 2  | 2   | 2  | 37.749 | 5.87  | 1000000  |          |          |  | 5.551447 |
| Q9CQM9 | Glutaredoxin-3 OS=Mus musculus GN=Glxr3 PE=1 SV=1                                                    | 10.68249 | 3  | 6   | 3  | 37.754 | 5.59  | 4600000  | 3800000  | 3500000  |  | 21.31594 |
| Q9D832 | Dnaj homolog subfamily B member 4 OS=Mus musculus GN=Dnajb4 PE=1 SV=1                                | 11.27596 | 3  | 6   | 2  | 37.758 | 8.59  | 2000000  | 3000000  | 2700000  |  | 17.00712 |
| Q8VDY9 | Caspase activity and apoptosis inhibitor 1 OS=Mus musculus GN=Caap1 PE=1 SV=2                        | 4.775281 | 1  | 1   | 1  | 37.802 | 4.72  |          |          | 550000   |  | 3.04493  |
| Q62313 | Trans-Golgi network integral membrane protein 1 OS=Mus musculus GN=Tgoln1 PE=1 SV=1                  | 25.77904 | 4  | 7   | 4  | 37.826 | 5.34  | 2300000  | 1300000  | 780000   |  | 20.82732 |
| Q9JM96 | Cdc42 effector protein 4 OS=Mus musculus GN=Cdc42ep4 PE=1 SV=1                                       | 4.297994 | 1  | 1   | 1  | 37.846 | 5.36  | 410000   |          |          |  | 2.995313 |
| Q8BFZ9 | Erlin-2 OS=Mus musculus GN=Erlin2 PE=1 SV=1                                                          | 19.11765 | 6  | 13  | 4  | 37.849 | 5.5   | 7500000  | 9200000  | 6100000  |  | 36.77972 |
| Q9QYA2 | Mitochondrial import receptor subunit TOM40 homolog OS=Mus musculus GN=Tomm40 PE=1 SV=3              | 9.972299 | 3  | 10  | 3  | 37.871 | 7.74  | 3400000  | 1600000  | 1200000  |  | 29.21231 |
| Q80Z24 | Neuronal growth regulator 1 OS=Mus musculus GN=Negr1 PE=1 SV=1                                       | 5.747126 | 1  | 4   | 1  | 37.876 | 6.52  | 710000   | 620000   | 880000   |  | 12.62503 |
| P14429 | H-2 class I histocompatibility antigen, Q7 alpha chain OS=Mus musculus GN=H2-Q7 PE=1 SV=1            | 19.46108 | 6  | 30  | 1  | 37.9   | 6.29  | 1100000  | 3600000  | 760000   |  | 85.38514 |
| Q9CQY5 | Magnesium transporter protein 1 OS=Mus musculus GN=Magt1 PE=1 SV=1                                   | 5.671642 | 2  | 4   | 2  | 37.944 | 9.76  | 4500000  |          | 5100000  |  | 9.331123 |
| Q99PJ0 | Neurotrimin OS=Mus musculus GN=Ntm PE=1 SV=2                                                         | 8.72093  | 2  | 9   | 2  | 37.96  | 7.81  | 7900000  | 4100000  | 3600000  |  | 26.20668 |
| Q9DCH4 | Eukaryotic translation initiation factor 3 subunit F OS=Mus musculus GN=Eif3f PE=1 SV=2              | 6.925208 | 2  | 5   | 2  | 37.96  | 5.58  | 2400000  | 3500000  | 2400000  |  | 16.56455 |
| Q8R1Z9 | RING finger protein 121 OS=Mus musculus GN=Rnf121 PE=1 SV=1                                          | 5.198777 | 1  | 2   | 1  | 37.961 | 7.06  | 710000   |          |          |  | 4.663744 |
| Q8BH97 | Reticulocalbin-3 OS=Mus musculus GN=Rcn3 PE=1 SV=1                                                   | 16.46341 | 4  | 7   | 4  | 37.978 | 4.88  | 940000   | 1000000  | 2400000  |  | 21.06826 |
| Q99L27 | GMP reductase 2 OS=Mus musculus GN=Gmpr2 PE=1 SV=2                                                   | 4.885057 | 1  | 1   | 1  | 37.994 | 7.44  |          |          | 950000   |  | 0        |
| Q8K021 | Secretory carrier-associated membrane protein 1 OS=Mus musculus GN=Scamp1 PE=1 SV=1                  | 7.100592 | 2  | 3   | 2  | 38.004 | 7.71  | 2300000  |          | 1300000  |  | 9.620121 |
| Q8BLK3 | Limbic system-associated membrane protein OS=Mus musculus GN=Lsamp PE=1 SV=1                         | 15.83578 | 4  | 6   | 4  | 38.063 | 6.65  | 3500000  | 1400000  | 680000   |  | 18.3665  |
| Q99L45 | Eukaryotic translation initiation factor 2 subunit 2 OS=Mus musculus GN=Eif2s2 PE=1 SV=1             | 43.20242 | 12 | 39  | 12 | 38.068 | 5.8   | 16000000 | 14000000 | 12000000 |  | 123.02   |
| Q8BR65 | Sin3 histone deacetylase corepressor complex component SDS3 OS=Mus musculus GN=Suds3 PE=1 SV=1       | 7.621951 | 2  | 3   | 2  | 38.083 | 5.66  | 460000   |          | 520000   |  | 8.74532  |
| Q05186 | Reticulocalbin-1 OS=Mus musculus GN=Rcn1 PE=1 SV=1                                                   | 22.46154 | 7  | 13  | 7  | 38.09  | 4.84  | 6200000  | 6700000  | 6900000  |  | 42.99046 |
| P40336 | Vacuolar protein sorting-associated protein 26A OS=Mus musculus GN=Vps26a PE=1 SV=1                  | 9.174312 | 2  | 5   | 2  | 38.09  | 6.57  | 9100000  | 6700000  | 7000000  |  | 18.77296 |
| Q8BK64 | Activator of 90 kDa heat shock protein ATPase homolog 1 OS=Mus musculus GN=Ahsa1 PE=1 SV=2           | 7.39645  | 2  | 3   | 2  | 38.093 | 5.53  |          | 770000   |          |  | 7.740734 |
| Q6P6J9 | Thioredoxin domain-containing protein 15 OS=Mus musculus GN=Txndc15 PE=1 SV=1                        | 6.104651 | 1  | 3   | 1  | 38.122 | 4.77  | 800000   | 520000   | 600000   |  | 5.062422 |
| Q9CX34 | Protein SGT1 homolog OS=Mus musculus GN=Sugt1 PE=1 SV=3                                              | 15.77381 | 4  | 9   | 4  | 38.135 | 5.45  | 2900000  | 1800000  | 1500000  |  | 25.70407 |
| Q9QYJ3 | Dnaj homolog subfamily B member 1 OS=Mus musculus GN=Dnajb1 PE=1 SV=3                                | 18.82353 | 5  | 9   | 4  | 38.143 | 8.63  | 2700000  | 940000   | 2100000  |  | 25.79836 |
| Q9CXR1 | Dehydrogenase/reductase SDR family member 7 OS=Mus musculus GN=Dhrs7 PE=1 SV=2                       | 5.91716  | 1  | 2   | 1  | 38.143 | 8.32  | 3200000  | 2200000  |          |  | 8.9784   |
| Q922Q1 | Mitochondrial amidoxime reducing component 2 OS=Mus musculus GN=Marc2 PE=1 SV=1                      | 9.467456 | 3  | 8   | 3  | 38.17  | 8.68  | 7100000  | 7800000  | 6300000  |  | 23.18638 |
| Q8R2Y0 | Monoacylglycerol lipase ABHD6 OS=Mus musculus GN=Abhd6 PE=1 SV=1                                     | 4.464286 | 1  | 3   | 1  | 38.18  | 8.47  | 2600000  | 1900000  | 1900000  |  | 12.71053 |
| Q9CYA0 | Cysteine-rich with EGF-like domain protein 2 OS=Mus musculus GN=Credl2 PE=1 SV=1                     | 4.571429 | 1  | 3   | 1  | 38.194 | 4.58  | 1900000  | 1800000  | 2100000  |  | 10.75737 |

|        |                                                                                                                  |          |    |    |    |        |       |          |          |          |          |
|--------|------------------------------------------------------------------------------------------------------------------|----------|----|----|----|--------|-------|----------|----------|----------|----------|
| Q61990 | Poly(rC)-binding protein 2 OS=Mus musculus GN=Pcbp2 PE=1 SV=1                                                    | 16.0221  | 5  | 18 | 1  | 38.197 | 6.79  | 4900000  | 7800000  | 6000000  | 54.26385 |
| P51885 | Lumican OS=Mus musculus GN=Lum PE=1 SV=2                                                                         | 11.83432 | 3  | 5  | 3  | 38.241 | 6.43  | 7700000  | 4600000  | 6900000  | 13.62608 |
| Q80XN0 | D-beta-hydroxybutyrate dehydrogenase, mitochondrial OS=Mus musculus GN=Bdh1 PE=1 SV=2                            | 10.20408 | 3  | 7  | 3  | 38.274 | 9.01  | 2600000  | 2300000  | 1100000  | 19.70187 |
| Q60668 | Heterogeneous nuclear ribonucleoprotein D0 OS=Mus musculus GN=Hnrnpd PE=1 SV=2                                   | 22.8169  | 6  | 22 | 5  | 38.33  | 7.81  | 47000000 | 40000000 | 40000000 | 63.42538 |
| O35685 | Nuclear migration protein nudC OS=Mus musculus GN=Nudc PE=1 SV=1                                                 | 26.80723 | 8  | 21 | 8  | 38.334 | 5.26  | 5500000  | 6000000  | 4700000  | 60.60597 |
| Q8K4R4 | Cytoplasmic phosphatidylinositol transfer protein 1 OS=Mus musculus GN=Pitpnc1 PE=1 SV=1                         | 3.614458 | 1  | 1  | 1  | 38.359 | 6.32  | 1100000  |          |          | 1.817876 |
| Q99JB2 | Stomatin-like protein 2, mitochondrial OS=Mus musculus GN=Stoml2 PE=1 SV=1                                       | 21.24646 | 6  | 14 | 6  | 38.361 | 8.87  | 5700000  | 6300000  | 4000000  | 45.34358 |
| Q9Z1Z2 | Serine-threonine kinase receptor-associated protein OS=Mus musculus GN=Strap PE=1 SV=2                           | 23.71429 | 6  | 15 | 6  | 38.418 | 5.12  | 5700000  | 4100000  | 3800000  | 43.25776 |
| O35609 | Secretory carrier-associated membrane protein 3 OS=Mus musculus GN=Scamp3 PE=1 SV=3                              | 9.169054 | 2  | 4  | 2  | 38.433 | 7.64  | 1700000  | 1600000  |          | 12.01932 |
| O70370 | Cathepsin S OS=Mus musculus GN=Ctss PE=1 SV=2                                                                    | 8.823529 | 2  | 5  | 2  | 38.449 | 6.96  | 3400000  | 2500000  | 1100000  | 15.99046 |
| Q8R3G1 | Nuclear inhibitor of protein phosphatase 1 OS=Mus musculus GN=Ppp1r8 PE=1 SV=1                                   | 10.25641 | 2  | 5  | 2  | 38.504 | 7.37  | 810000   | 5300000  | 770000   | 17.58696 |
| Q9JKF7 | 39S ribosomal protein L39, mitochondrial OS=Mus musculus GN=Mrpl39 PE=1 SV=4                                     | 3.571429 | 1  | 1  | 1  | 38.525 | 7.94  | 1800000  |          |          | 2.68607  |
| P70441 | Na(+)/H(+) exchange regulatory cofactor NHE-RF1 OS=Mus musculus GN=Slc9a3r1 PE=1 SV=3                            | 9.295775 | 2  | 4  | 2  | 38.577 | 5.9   | 3800000  | 2800000  |          | 13.45981 |
| Q80V26 | Inositol monophosphatase 3 OS=Mus musculus GN=Impad1 PE=1 SV=1                                                   | 3.932584 | 1  | 1  | 1  | 38.592 | 6.47  |          | 1300000  |          | 2.840431 |
| Q9R1T2 | SUMO-activating enzyme subunit 1 OS=Mus musculus GN=Sae1 PE=1 SV=1                                               | 8.857143 | 2  | 3  | 2  | 38.596 | 5.36  |          | 620000   | 660000   | 12.26846 |
| Q9DBU6 | Serine/Arginine-related protein 53 OS=Mus musculus GN=Rsrc1 PE=1 SV=1                                            | 8.383234 | 1  | 3  | 1  | 38.614 | 11.15 | 660000   | 1800000  | 1100000  | 11.43872 |
| P07356 | Annexin A2 OS=Mus musculus GN=Anxa2 PE=1 SV=2                                                                    | 42.77286 | 15 | 44 | 15 | 38.652 | 7.69  | 15000000 | 14000000 | 17000000 | 145.61   |
| Q91XC9 | Peroxisomal membrane protein PEX16 OS=Mus musculus GN=Pex16 PE=1 SV=2                                            | 6.845238 | 1  | 1  | 1  | 38.653 | 9.72  |          | 940000   |          | 2.685119 |
| Q9WUK4 | Replication factor C subunit 2 OS=Mus musculus GN=Rfc2 PE=1 SV=1                                                 | 3.724928 | 1  | 1  | 1  | 38.7   | 6.44  | 2000000  |          |          | 3.143086 |
| P10107 | Annexin A1 OS=Mus musculus GN=Anxa1 PE=1 SV=2                                                                    | 30.63584 | 9  | 25 | 9  | 38.71  | 7.37  | 20000000 | 16000000 | 16000000 | 81.56007 |
| Q9R226 | KH domain-containing, RNA-binding, signal transduction-associated protein 3 OS=Mus musculus GN=Khdrbs3 PE=1 SV=1 | 5.780347 | 2  | 5  | 1  | 38.784 | 8.1   | 560000   |          | 310000   | 9.614548 |
| Q9JKB3 | Y-box-binding protein 3 OS=Mus musculus GN=Ybx3 PE=1 SV=2                                                        | 28.25485 | 7  | 24 | 4  | 38.79  | 9.69  | 3900000  | 3300000  | 3300000  | 84.93537 |
| Q99LD9 | Translation initiation factor eIF-2B subunit beta OS=Mus musculus GN=Eif2b2 PE=1 SV=1                            | 5.128205 | 1  | 1  | 1  | 38.873 | 6.24  |          | 350000   |          | 2.352975 |
| Q8BK63 | Casein kinase I isoform alpha OS=Mus musculus GN=Csnk1a1 PE=1 SV=2                                               | 12.16617 | 3  | 5  | 3  | 38.89  | 9.57  | 830000   | 1400000  | 1100000  | 13.26671 |
| Q9D051 | Pyruvate dehydrogenase E1 component subunit beta, mitochondrial OS=Mus musculus GN=Pdhb PE=1 SV=1                | 31.47632 | 9  | 23 | 9  | 38.912 | 6.87  | 17000000 | 14000000 | 8500000  | 71.89628 |
| Q91X78 | Erlin-1 OS=Mus musculus GN=Erlin1 PE=1 SV=1                                                                      | 13.58382 | 5  | 8  | 3  | 38.912 | 7.21  |          | 1600000  | 2100000  | 19.48194 |
| Q69ZC8 | GPALPP motifs-containing protein 1 OS=Mus musculus GN=Gpalpp1 PE=1 SV=2                                          | 3.757225 | 1  | 1  | 1  | 38.931 | 5.41  |          |          |          | 2.511145 |
| Q61249 | Immunoglobulin-binding protein 1 OS=Mus musculus GN=Igbp1 PE=1 SV=1                                              | 4.411765 | 1  | 3  | 1  | 38.947 | 6.18  | 1300000  | 1300000  | 1600000  | 10.27026 |
| Q9DAR7 | m7GpppX diphosphatase OS=Mus musculus GN=Dcps PE=1 SV=1                                                          | 13.31361 | 3  | 4  | 3  | 38.964 | 6.48  | 820000   | 1600000  | 530000   | 13.06385 |
| P30993 | C5a anaphylatoxin chemotactic receptor 1 OS=Mus musculus GN=C5ar1 PE=1 SV=2                                      | 3.418803 | 1  | 3  | 1  | 38.998 | 8.79  | 880000   | 1100000  | 780000   | 7.179169 |
| Q3TWW8 | Serine/arginine-rich splicing factor 6 OS=Mus musculus GN=Srsf6 PE=1 SV=1                                        | 22.71386 | 8  | 29 | 5  | 39.002 | 11.46 | 14000000 | 15000000 | 16000000 | 79.77219 |
| Q9CYN9 | Renin receptor OS=Mus musculus GN=Atp6ap2 PE=1 SV=2                                                              | 3.714286 | 1  | 1  | 1  | 39.067 | 5.54  | 730000   |          |          | 2.435432 |
| P52432 | DNA-directed RNA polymerases I and III subunit RPAC1 OS=Mus musculus GN=Polr1c PE=1 SV=3                         | 8.381503 | 2  | 5  | 2  | 39.082 | 5.21  | 1100000  | 940000   | 1500000  | 17.61065 |
| Q8BYZ1 | ABI gene family member 3 OS=Mus musculus GN=Abi3 PE=1 SV=3                                                       | 4.087193 | 1  | 2  | 1  | 39.082 | 5.54  | 1100000  | 1300000  |          | 6.141532 |
| Q8C0E2 | Vacuolar protein sorting-associated protein 26B OS=Mus musculus GN=Vps26b PE=1 SV=1                              | 11.0119  | 3  | 5  | 3  | 39.1   | 7.37  | 5700000  | 4500000  | 4000000  | 15.84825 |
| P24452 | Macrophage-capping protein OS=Mus musculus GN=Capg PE=1 SV=2                                                     | 19.03409 | 6  | 18 | 6  | 39.216 | 7.2   | 16000000 | 16000000 | 14000000 | 60.03792 |
| Q6PE01 | U5 small nuclear ribonucleoprotein 40 kDa protein OS=Mus musculus GN=Snrnp40 PE=1 SV=1                           | 10.3352  | 4  | 8  | 4  | 39.251 | 8.1   | 3300000  | 2900000  | 2100000  | 23.71313 |
| Q8CFE2 | Histone PARylation factor 1 OS=Mus musculus GN=Hpf1 PE=1 SV=1                                                    | 10.11561 | 3  | 7  | 3  | 39.266 | 7.69  | 2600000  | 1600000  | 2000000  | 15.3726  |
| Q62087 | Serum paraoxonase/lactonase 3 OS=Mus musculus GN=Pon3 PE=1 SV=2                                                  | 7.344633 | 2  | 5  | 2  | 39.326 | 5.74  | 2500000  | 1600000  | 3100000  | 11.31972 |
| P05064 | Fructose-bisphosphate aldolase A OS=Mus musculus GN=Aldoa PE=1 SV=2                                              | 55.76923 | 20 | 72 | 18 | 39.331 | 8.09  | 1.1E+08  | 92000000 | 75000000 | 231.8192 |
| Q9EPK2 | Protein XRP2 OS=Mus musculus GN=Rp2 PE=1 SV=3                                                                    | 2.305476 | 1  | 1  | 1  | 39.351 | 5.24  |          | 1200000  |          | 1.833826 |
| O70126 | Aurora kinase B OS=Mus musculus GN=Aurkb PE=1 SV=2                                                               | 3.478261 | 1  | 1  | 1  | 39.36  | 9.44  |          | 1100000  |          | 1.999176 |
| P05063 | Fructose-bisphosphate aldolase C OS=Mus musculus GN=Aldoc PE=1 SV=4                                              | 42.97521 | 13 | 37 | 11 | 39.37  | 7.12  | 24000000 | 19000000 | 20000000 | 115.131  |
| P23906 | Interferon regulatory factor 2 OS=Mus musculus GN=Irf2 PE=1 SV=1                                                 | 3.724928 | 1  | 2  | 1  | 39.428 | 7.49  | 830000   | 650000   |          | 5.914982 |
| Q9Z0P5 | Twinfilin-2 OS=Mus musculus GN=Twf2 PE=1 SV=1                                                                    | 10.88825 | 2  | 2  | 2  | 39.446 | 6.8   |          | 2700000  | 340000   | 8.427547 |
| Q9JHJ0 | Tropomodulin-3 OS=Mus musculus GN=Tmod3 PE=1 SV=1                                                                | 14.77273 | 4  | 5  | 4  | 39.478 | 5.14  | 1100000  | 5200000  | 2300000  | 12.47968 |
| Q9JKK7 | Tropomodulin-2 OS=Mus musculus GN=Tmod2 PE=1 SV=2                                                                | 8.262108 | 2  | 4  | 2  | 39.487 | 5.35  | 1700000  | 2300000  | 1400000  | 13.77969 |
| Q62086 | Serum paraoxonase/arylesterase 2 OS=Mus musculus GN=Pon2 PE=1 SV=2                                               | 14.40678 | 4  | 8  | 4  | 39.592 | 5.83  | 3900000  | 3300000  | 2000000  | 24.36095 |
| Q8VEM8 | Phosphate carrier protein, mitochondrial OS=Mus musculus GN=Slc25a3 PE=1 SV=1                                    | 16.80672 | 6  | 19 | 6  | 39.606 | 9.26  | 42000000 | 42000000 | 46000000 | 48.50335 |
| Q9D6R2 | Isocitrate dehydrogenase [NAD] subunit alpha, mitochondrial OS=Mus musculus GN=Idh3a PE=1 SV=1                   | 22.6776  | 7  | 15 | 7  | 39.613 | 6.73  | 11000000 | 7000000  | 6300000  | 38.21211 |
| Q8BG05 | Heterogeneous nuclear ribonucleoprotein A3 OS=Mus musculus GN=Hnrnpa3 PE=1 SV=1                                  | 38.78628 | 14 | 68 | 14 | 39.628 | 9.01  | 1.2E+08  | 1.1E+08  | 1.3E+08  | 222.4214 |
| P70460 | Vasodilator-stimulated phosphoprotein OS=Mus musculus GN=Vasp PE=1 SV=4                                          | 24.26667 | 7  | 18 | 7  | 39.642 | 8.53  | 5300000  | 4100000  | 4400000  | 44.36422 |
| Q3UMR5 | Calcium uniporter protein, mitochondrial OS=Mus musculus GN=Mcu PE=1 SV=2                                        | 7.428571 | 2  | 4  | 2  | 39.657 | 8.56  | 2700000  | 1900000  | 1400000  | 10.49778 |

|        |                                                                                                                   |          |    |    |    |        |      |          |          |          |          |
|--------|-------------------------------------------------------------------------------------------------------------------|----------|----|----|----|--------|------|----------|----------|----------|----------|
| Q8K1E0 | Syntaxin-5 OS=Mus musculus GN=Stx5 PE=1 SV=3                                                                      | 5.070423 | 1  | 2  | 1  | 39.689 | 8.92 |          | 550000   | 650000   | 6.332336 |
| Q9QZQ8 | Core histone macro-H2A.1 OS=Mus musculus GN=H2afy PE=1 SV=3                                                       | 25       | 8  | 30 | 7  | 39.71  | 9.8  | 21000000 | 18000000 | 19000000 | 100.8379 |
| Q8R2U0 | Nucleoporin SEH1 OS=Mus musculus GN=Seh1 PE=2 SV=1                                                                | 7.222222 | 2  | 5  | 2  | 39.749 | 8.05 | 2000000  | 1500000  | 1400000  | 14.29838 |
| Q9D880 | Mitochondrial import inner membrane translocase subunit TIM50 OS=Mus musculus GN=Timm50 PE=1 SV=1                 | 12.46459 | 3  | 7  | 3  | 39.752 | 8.13 | 5400000  | 5700000  | 3300000  | 22.64361 |
| O54946 | Dnal homolog subfamily B member 6 OS=Mus musculus GN=Dnajb6 PE=1 SV=4                                             | 6.30137  | 2  | 4  | 1  | 39.783 | 9.36 | 6900000  |          |          | 12.09608 |
| Q91WK2 | Eukaryotic translation initiation factor 3 subunit H OS=Mus musculus GN=Eif3h PE=1 SV=1                           | 13.92045 | 4  | 13 | 4  | 39.807 | 6.67 | 6500000  | 7400000  | 6800000  | 43.48849 |
| Q06138 | Calcium-binding protein 39 OS=Mus musculus GN=Cab39 PE=1 SV=2                                                     | 4.398827 | 1  | 1  | 1  | 39.818 | 6.89 | 430000   |          |          | 2.232907 |
| Q9QXV1 | Chromobox protein homolog 8 OS=Mus musculus GN=Cbx8 PE=1 SV=1                                                     | 6.077348 | 1  | 1  | 1  | 39.836 | 9.94 |          | 1100000  |          | 5.198928 |
| Q99J62 | Replication factor C subunit 4 OS=Mus musculus GN=Rfc4 PE=1 SV=1                                                  | 5.769231 | 2  | 4  | 2  | 39.842 | 6.7  | 1400000  | 1600000  | 1700000  | 10.91086 |
| Q9JHK5 | Pleckstrin OS=Mus musculus GN=Plek PE=1 SV=1                                                                      | 7.714286 | 2  | 4  | 2  | 39.876 | 8.34 | 2500000  | 2800000  | 2300000  | 9.260718 |
| Q8BTZ7 | Mannose-1-phosphate guanyltransferase beta OS=Mus musculus GN=Gmppb PE=1 SV=1                                     | 6.666667 | 2  | 4  | 2  | 39.891 | 6.74 | 1000000  | 860000   | 800000   | 12.81852 |
| Q9CX56 | 26S proteasome non-ATPase regulatory subunit 8 OS=Mus musculus GN=Psm8 PE=1 SV=2                                  | 2.832861 | 1  | 2  | 1  | 39.905 | 9.58 | 3300000  | 2900000  |          | 2.073785 |
| Q62420 | Endophilin-A1 OS=Mus musculus GN=Sh3gl2 PE=1 SV=2                                                                 | 21.59091 | 6  | 21 | 4  | 39.93  | 5.39 | 9700000  | 6600000  | 6600000  | 59.36609 |
| O08573 | Galectin-9 OS=Mus musculus GN=Lgals9 PE=1 SV=1                                                                    | 3.68272  | 1  | 3  | 1  | 40.01  | 9.31 | 4700000  | 3800000  | 4000000  | 9.862791 |
| Q7TND5 | Ribosome production factor 1 OS=Mus musculus GN=Rpf1 PE=2 SV=2                                                    | 7.163324 | 1  | 1  | 1  | 40.012 | 9.99 |          | 620000   |          | 3.06327  |
| Q9Z1S5 | Neuronal-specific septin-3 OS=Mus musculus GN=Sept3 PE=1 SV=2                                                     | 9.428571 | 3  | 3  | 3  | 40.013 | 6.81 | 1300000  | 3000000  |          | 7.555472 |
| P15702 | Leukosialin OS=Mus musculus GN=Spn PE=1 SV=1                                                                      | 10.37975 | 2  | 5  | 2  | 40.014 | 4.96 | 1900000  | 4400000  | 3100000  | 19.68178 |
| Q8C7Q4 | RNA-binding protein 4 OS=Mus musculus GN=Rbm4 PE=1 SV=1                                                           | 4.432133 | 1  | 3  | 1  | 40.02  | 7.06 | 760000   | 590000   | 750000   | 9.77931  |
| Q91YR1 | Twinfilin-1 OS=Mus musculus GN=Twf1 PE=1 SV=2                                                                     | 10.57143 | 3  | 6  | 3  | 40.054 | 6.67 | 2800000  | 2300000  | 3100000  | 19.83006 |
| P18872 | Guanine nucleotide-binding protein G(o) subunit alpha OS=Mus musculus GN=Gnao1 PE=1 SV=3                          | 30.50847 | 10 | 45 | 9  | 40.059 | 5.53 | 77000000 | 39000000 | 34000000 | 120.4923 |
| Q8CCK0 | Core histone macro-H2A.2 OS=Mus musculus GN=H2afy2 PE=1 SV=3                                                      | 8.333333 | 2  | 3  | 1  | 40.067 | 9.69 |          | 1200000  |          | 9.199392 |
| Q61559 | IgG receptor FcRn large subunit p51 OS=Mus musculus GN=Fcgrt PE=1 SV=1                                            | 2.465753 | 1  | 1  | 1  | 40.067 | 5.29 | 1100000  |          |          | 2.13216  |
| P55264 | Adenosine kinase OS=Mus musculus GN=Adk PE=1 SV=2                                                                 | 2.216066 | 1  | 3  | 1  | 40.123 | 6.21 |          | 1800000  | 920000   | 7.184405 |
| Q8R409 | Protein HEXIM1 OS=Mus musculus GN=Hexim1 PE=1 SV=1                                                                | 4.775281 | 1  | 2  | 1  | 40.219 | 5.38 | 860000   | 1100000  |          | 8.088418 |
| P51863 | V-type proton ATPase subunit d 1 OS=Mus musculus GN=Atp6v0d1 PE=1 SV=2                                            | 14.24501 | 5  | 11 | 5  | 40.275 | 5    | 8800000  | 9600000  | 7700000  | 27.61844 |
| P21855 | B-cell differentiation antigen CD72 OS=Mus musculus GN=Cd72 PE=1 SV=2                                             | 3.389831 | 1  | 2  | 1  | 40.322 | 6.43 | 1500000  | 970000   |          | 5.988733 |
| B2RSH2 | Guanine nucleotide-binding protein G(i) subunit alpha-1 OS=Mus musculus GN=Gnai1 PE=1 SV=1                        | 26.55367 | 8  | 24 | 4  | 40.335 | 5.97 | 4300000  | 1100000  | 2200000  | 63.20175 |
| Q9D8N2 | Protein FAM45A OS=Mus musculus GN=Fam45a PE=1 SV=2                                                                | 9.243697 | 2  | 2  | 2  | 40.395 | 6.47 |          | 1100000  | 650000   | 6.170751 |
| Q9DBH5 | Vesicular integral-membrane protein VIP36 OS=Mus musculus GN=Lman2 PE=1 SV=2                                      | 17.87709 | 5  | 13 | 5  | 40.404 | 6.95 | 6400000  | 2800000  | 7200000  | 38.56522 |
| Q99K85 | Phosphoserine aminotransferase OS=Mus musculus GN=Psat1 PE=1 SV=1                                                 | 11.62162 | 4  | 9  | 4  | 40.447 | 8.03 | 3600000  | 3700000  | 3700000  | 23.68916 |
| Q9QUP5 | Hyaluronan and proteoglycan link protein 1 OS=Mus musculus GN=Hapln1 PE=1 SV=1                                    | 8.146067 | 3  | 4  | 3  | 40.452 | 7.8  | 2200000  | 1300000  |          | 9.670561 |
| P08752 | Guanine nucleotide-binding protein G(i) subunit alpha-2 OS=Mus musculus GN=Gnai2 PE=1 SV=5                        | 31.26761 | 9  | 38 | 5  | 40.463 | 5.45 | 30000000 | 21000000 | 15000000 | 122.0488 |
| Q8VHL1 | Histone-lysine N-methyltransferase SETD7 OS=Mus musculus GN=Setd7 PE=1 SV=2                                       | 5.464481 | 1  | 1  | 1  | 40.481 | 4.65 |          |          |          | 1.848361 |
| P32233 | Developmentally-regulated GTP-binding protein 1 OS=Mus musculus GN=Drg1 PE=1 SV=1                                 | 11.71662 | 3  | 7  | 3  | 40.487 | 8.9  | 1100000  | 1400000  | 1400000  | 27.4387  |
| Q8R323 | Replication factor C subunit 3 OS=Mus musculus GN=Rfc3 PE=1 SV=1                                                  | 2.52809  | 1  | 1  | 1  | 40.5   | 8.38 |          | 1800000  |          | 2.264391 |
| Q9DC51 | Guanine nucleotide-binding protein G(k) subunit alpha OS=Mus musculus GN=Gnai3 PE=1 SV=3                          | 16.94915 | 5  | 17 | 2  | 40.512 | 5.69 | 2800000  | 2200000  | 1800000  | 44.92998 |
| Q99KV1 | Dnal homolog subfamily B member 11 OS=Mus musculus GN=Dnajb11 PE=1 SV=1                                           | 30.44693 | 7  | 24 | 7  | 40.53  | 6.32 | 12000000 | 12000000 | 10000000 | 83.00828 |
| P05132 | cAMP-dependent protein kinase catalytic subunit alpha OS=Mus musculus GN=Prkaca PE=1 SV=3                         | 9.401709 | 3  | 4  | 1  | 40.545 | 8.79 | 1900000  |          |          | 8.214645 |
| Q99LC3 | NADH dehydrogenase [ubiquinone] 1 alpha subcomplex subunit 10, mitochondrial OS=Mus musculus GN=Ndufa10 PE=1 SV=1 | 9.859155 | 3  | 5  | 3  | 40.578 | 7.78 | 7900000  | 1900000  | 1700000  | 13.18146 |
| O35226 | 26S proteasome non-ATPase regulatory subunit 4 OS=Mus musculus GN=Psm8 PE=1 SV=1                                  | 14.89362 | 3  | 9  | 3  | 40.678 | 4.79 | 2100000  | 4800000  | 4300000  | 36.68654 |
| P68181 | cAMP-dependent protein kinase catalytic subunit beta OS=Mus musculus GN=Prkacb PE=1 SV=2                          | 9.401709 | 3  | 5  | 1  | 40.682 | 8.56 | 690000   |          | 360000   | 11.10716 |
| Q9C244 | NSFL1 cofactor p47 OS=Mus musculus GN=Nsf11c PE=1 SV=1                                                            | 34.32432 | 9  | 26 | 9  | 40.685 | 5.15 | 7300000  | 5100000  | 5200000  | 85.12438 |
| Q3UND0 | Src kinase-associated phosphoprotein 2 OS=Mus musculus GN=Skap2 PE=1 SV=2                                         | 18.15642 | 5  | 10 | 5  | 40.687 | 4.7  | 2300000  | 2500000  | 2100000  | 22.03733 |
| Q8VC70 | RNA-binding motif, single-stranded-interacting protein 2 OS=Mus musculus GN=Rbms2 PE=1 SV=1                       | 5.744125 | 1  | 1  | 1  | 40.698 | 9.07 |          | 130000   |          | 2.860252 |
| Q9CR16 | Peptidyl-prolyl cis-trans isomerase D OS=Mus musculus GN=Ppid PE=1 SV=3                                           | 13.51351 | 4  | 14 | 4  | 40.717 | 7.43 | 6600000  | 4700000  | 4200000  | 39.09943 |
| Q9D5T0 | ATPase family AAA domain-containing protein 1 OS=Mus musculus GN=Atad1 PE=1 SV=1                                  | 9.418283 | 2  | 4  | 2  | 40.718 | 6.9  | 1900000  | 2000000  | 3300000  | 10.08538 |
| Q5S580 | Dehydrogenase/reductase SDR family member 13 OS=Mus musculus GN=Dhrs13 PE=1 SV=1                                  | 9.308511 | 1  | 1  | 1  | 40.719 | 7.93 |          | 1300000  |          | 2.952105 |
| Q8C1E7 | Transmembrane protein 120A OS=Mus musculus GN=Tmem120a PE=1 SV=1                                                  | 3.206997 | 1  | 1  | 1  | 40.725 | 8.88 |          | 350000   |          | 2.455322 |
| Q9QYG0 | Protein NDRG2 OS=Mus musculus GN=Ndr2 PE=1 SV=1                                                                   | 12.93801 | 3  | 5  | 3  | 40.763 | 5.4  | 3500000  | 690000   | 1800000  | 16.20135 |
| P01899 | H-2 class I histocompatibility antigen, D-B alpha chain OS=Mus musculus GN=H2-D1 PE=1 SV=2                        | 47.23757 | 20 | 92 | 15 | 40.81  | 6.73 | 77000000 | 62000000 | 59000000 | 271.9714 |
| Q9JK48 | Endophilin-B1 OS=Mus musculus GN=Sh3glb1 PE=1 SV=1                                                                | 9.589041 | 4  | 10 | 3  | 40.83  | 6.04 | 4500000  | 2900000  | 2600000  | 23.83542 |
| P06339 | H-2 class I histocompatibility antigen, D-37 alpha chain OS=Mus musculus GN=H2-T23 PE=1 SV=1                      | 9.52381  | 3  | 10 | 2  | 40.849 | 6.35 | 4500000  | 6100000  | 3100000  | 28.29234 |
| Q8R574 | Phosphoribosyl pyrophosphate synthase-associated protein 2 OS=Mus musculus GN=Prpsap2 PE=1 SV=1                   | 2.710027 | 1  | 3  | 1  | 40.854 | 7.17 | 460000   | 420000   | 320000   | 6.811187 |

|        |                                                                                             |          |    |     |    |        |       |          |          |          |          |
|--------|---------------------------------------------------------------------------------------------|----------|----|-----|----|--------|-------|----------|----------|----------|----------|
| Q8R1N4 | NudC domain-containing protein 3 OS=Mus musculus GN=Nudcd3 PE=1 SV=3                        | 4.132231 | 1  | 1   | 1  | 40.865 | 5.26  |          | 960000   |          | 2.593429 |
| P13011 | Acyl-CoA desaturase 2 OS=Mus musculus GN=Scd2 PE=1 SV=2                                     | 8.100559 | 2  | 3   | 2  | 40.89  | 9.01  | 450000   | 340000   |          | 9.412795 |
| Q8C570 | mRNA export factor OS=Mus musculus GN=Rae1 PE=1 SV=1                                        | 6.25     | 2  | 3   | 2  | 40.939 | 7.83  | 900000   |          |          | 6.691265 |
| Q64314 | Hematopoietic progenitor cell antigen CD34 OS=Mus musculus GN=Cd34 PE=1 SV=1                | 2.094241 | 1  | 1   | 1  | 40.957 | 5.3   |          | 740000   |          | 2.002149 |
| P62482 | Voltage-gated potassium channel subunit beta-2 OS=Mus musculus GN=Kcnab2 PE=1 SV=1          | 2.724796 | 1  | 1   | 1  | 40.995 | 9     | 1100000  |          |          | 2.600045 |
| Q8VEK0 | Cell cycle control protein 50A OS=Mus musculus GN=Tmem30a PE=1 SV=1                         | 4.67033  | 1  | 3   | 1  | 41.035 | 8.37  | 1900000  | 1500000  | 1200000  | 11.06643 |
| Q9WV32 | Actin-related protein 2/3 complex subunit 1B OS=Mus musculus GN=Arpc1b PE=1 SV=4            | 25       | 6  | 23  | 6  | 41.037 | 8.35  | 31000000 | 36000000 | 26000000 | 84.56065 |
| Q9CXW2 | 28S ribosomal protein S22, mitochondrial OS=Mus musculus GN=Mrps22 PE=1 SV=1                | 6.128134 | 2  | 4   | 2  | 41.167 | 8.56  | 1300000  | 860000   | 990000   | 10.40528 |
| Q9R0A0 | Peroxisomal membrane protein PEX14 OS=Mus musculus GN=Pex14 PE=1 SV=1                       | 17.81915 | 3  | 7   | 3  | 41.183 | 5.11  | 1900000  | 2300000  | 1500000  | 25.01206 |
| O54833 | Casein kinase II subunit alpha' OS=Mus musculus GN=Csnk2a2 PE=1 SV=1                        | 10       | 2  | 5   | 2  | 41.189 | 8.56  | 1800000  | 1300000  | 620000   | 14.03114 |
| P70279 | Surfeit locus protein 6 OS=Mus musculus GN=Surf6 PE=1 SV=1                                  | 14.08451 | 5  | 8   | 5  | 41.21  | 10.52 | 2500000  | 3200000  | 3700000  | 18.24383 |
| Q9DCA5 | Ribosome biogenesis protein BRX1 homolog OS=Mus musculus GN=Brix1 PE=1 SV=3                 | 3.116147 | 1  | 1   | 1  | 41.215 | 10.02 |          | 930000   |          | 3.023992 |
| P63085 | Mitogen-activated protein kinase 1 OS=Mus musculus GN=Mapk1 PE=1 SV=3                       | 13.96648 | 5  | 15  | 3  | 41.249 | 6.98  | 8800000  | 7700000  | 6300000  | 40.60252 |
| P47811 | Mitogen-activated protein kinase 14 OS=Mus musculus GN=Mapk14 PE=1 SV=3                     | 2.222222 | 1  | 1   | 1  | 41.261 | 5.88  | 930000   |          |          | 11.80438 |
| P01901 | H-2 class I histocompatibility antigen, K-B alpha chain OS=Mus musculus GN=H2-K1 PE=1 SV=1  | 42.54743 | 13 | 63  | 4  | 41.276 | 6.39  | 41000000 | 34000000 | 33000000 | 204.2889 |
| O88741 | Ganglioside-induced differentiation-associated protein 1 OS=Mus musculus GN=Gdap1 PE=1 SV=1 | 4.189944 | 1  | 2   | 1  | 41.285 | 8.37  | 3100000  | 1200000  |          | 7.645643 |
| Q8C5L7 | RNA-binding protein 34 OS=Mus musculus GN=Rbm34 PE=1 SV=1                                   | 5.6      | 1  | 2   | 1  | 41.301 | 9.64  |          |          | 1800000  | 6.356618 |
| Q9D5V6 | Synapse-associated protein 1 OS=Mus musculus GN=Syap1 PE=1 SV=1                             | 4.657534 | 1  | 2   | 1  | 41.324 | 4.54  | 790000   | 880000   |          | 7.138016 |
| Q9Z2Y3 | Homer protein homolog 1 OS=Mus musculus GN=Homer1 PE=1 SV=2                                 | 3.278689 | 1  | 3   | 1  | 41.388 | 5.53  | 1600000  | 1400000  | 1300000  | 8.075177 |
| P60762 | Mortality factor 4-like protein 1 OS=Mus musculus GN=Morf4l1 PE=1 SV=2                      | 3.867403 | 1  | 2   | 1  | 41.467 | 9.32  |          | 1300000  | 730000   | 6.276323 |
| Q62419 | Endophilin-A2 OS=Mus musculus GN=Sh3gl1 PE=1 SV=1                                           | 16.30435 | 5  | 13  | 3  | 41.492 | 5.72  | 2200000  | 1200000  | 1500000  | 33.87878 |
| P42208 | Septin-2 OS=Mus musculus GN=Sept2 PE=1 SV=2                                                 | 36.84211 | 10 | 28  | 10 | 41.499 | 6.55  | 16000000 | 8800000  | 12000000 | 89.26351 |
| Q9CYH6 | Ribosome biogenesis regulatory protein homolog OS=Mus musculus GN=Rrs1 PE=1 SV=1            | 15.34247 | 4  | 10  | 4  | 41.526 | 10.77 | 3700000  | 4100000  | 4300000  | 29.37663 |
| Q9QYF9 | Protein NDRG3 OS=Mus musculus GN=Ndr3 PE=1 SV=1                                             | 5.866667 | 1  | 1   | 1  | 41.529 | 5.25  | 970000   |          |          | 3.224146 |
| Q3TVP5 | Inactive ubiquitin thioesterase FAM105A OS=Mus musculus GN=Fam105a PE=1 SV=1                | 2.266289 | 1  | 2   | 1  | 41.549 | 9.22  |          | 750000   | 660000   | 3.808248 |
| Q9Z0P4 | Paralemmin-1 OS=Mus musculus GN=Palm PE=1 SV=1                                              | 33.94256 | 8  | 23  | 8  | 41.589 | 4.84  | 10000000 | 5700000  | 3500000  | 79.82589 |
| Q9R0Q6 | Actin-related protein 2/3 complex subunit 1A OS=Mus musculus GN=Arpc1a PE=1 SV=1            | 2.162162 | 1  | 1   | 1  | 41.6   | 8.18  |          |          | 2000000  | 1.830558 |
| P28653 | Biglycan OS=Mus musculus GN=Bgn PE=1 SV=1                                                   | 25.74526 | 8  | 19  | 8  | 41.613 | 7.27  | 14000000 | 15000000 | 13000000 | 60.11317 |
| P04223 | H-2 class I histocompatibility antigen, K-K alpha chain OS=Mus musculus GN=H2-K1 PE=1 SV=1  | 25.20325 | 8  | 26  | 1  | 41.62  | 7.03  |          |          | 380000   | 80.43783 |
| Q99L47 | Hsc70-interacting protein OS=Mus musculus GN=St13 PE=1 SV=1                                 | 18.86792 | 6  | 22  | 6  | 41.629 | 5.26  | 23000000 | 16000000 | 20000000 | 67.44459 |
| P49586 | Choline-phosphate cytidyltransferase A OS=Mus musculus GN=Pcyt1a PE=1 SV=1                  | 7.901907 | 2  | 5   | 2  | 41.641 | 7.03  | 2700000  | 1800000  | 1700000  | 13.89426 |
| Q9ES46 | Beta-parvin OS=Mus musculus GN=Parvb PE=1 SV=1                                              | 7.39726  | 2  | 4   | 1  | 41.643 | 6.33  |          | 450000   |          | 12.26346 |
| P60710 | Actin, cytoplasmic 1 OS=Mus musculus GN=Actb PE=1 SV=1                                      | 62.4     | 24 | 248 | 10 | 41.71  | 5.48  | 1.5E+09  | 1.5E+09  | 1.1E+09  | 722.5032 |
| Q9D8V0 | Minor histocompatibility antigen H13 OS=Mus musculus GN=Hm13 PE=1 SV=1                      | 18.25397 | 6  | 18  | 6  | 41.721 | 6.04  | 6500000  | 8500000  | 8700000  | 50.37245 |
| Q9JKN1 | Zinc transporter 7 OS=Mus musculus GN=Slc30a7 PE=1 SV=1                                     | 3.968254 | 1  | 1   | 1  | 41.763 | 6.84  |          |          |          | 2.177146 |
| P48759 | Pentraxin-related protein PTX3 OS=Mus musculus GN=Ptx3 PE=1 SV=2                            | 12.07349 | 4  | 7   | 4  | 41.785 | 5.38  | 3400000  | 3000000  | 5100000  | 17.48293 |
| P97441 | Zinc transporter 3 OS=Mus musculus GN=Slc30a3 PE=1 SV=1                                     | 3.865979 | 1  | 1   | 1  | 41.797 | 6.38  | 1900000  |          |          | 2.021428 |
| Q8BWT1 | 3-ketoacyl-CoA thiolase, mitochondrial OS=Mus musculus GN=Acaa2 PE=1 SV=3                   | 11.33501 | 3  | 6   | 3  | 41.803 | 8.09  | 2700000  | 1900000  | 2000000  | 18.65993 |
| Q91VA6 | Polymerase delta-interacting protein 2 OS=Mus musculus GN=Poldip2 PE=1 SV=1                 | 3.26087  | 1  | 2   | 1  | 41.844 | 8.63  | 750000   | 480000   |          | 4.913447 |
| Q5SSK3 | Transcription elongation factor, mitochondrial OS=Mus musculus GN=Tefm PE=1 SV=1            | 2.197802 | 1  | 1   | 1  | 41.847 | 9.51  |          | 550000   |          | 2.482957 |
| Q9QYI4 | Dnaj homolog subfamily B member 12 OS=Mus musculus GN=Dnajb12 PE=1 SV=2                     | 9.042553 | 2  | 4   | 2  | 41.962 | 8.51  | 1200000  | 1300000  |          | 14.22456 |
| P59235 | Nucleoporin Nup43 OS=Mus musculus GN=Nup43 PE=1 SV=2                                        | 4.210526 | 1  | 2   | 1  | 41.963 | 5.39  |          | 530000   | 480000   | 6.994075 |
| Q6NSU3 | Glycosyltransferase 8 domain-containing protein 1 OS=Mus musculus GN=Glt8d1 PE=1 SV=1       | 3.773585 | 1  | 3   | 1  | 41.964 | 9.41  | 520000   | 540000   | 530000   | 7.674221 |
| Q8R2G4 | Ecto-ADP-ribosyltransferase 3 OS=Mus musculus GN=Art3 PE=1 SV=2                             | 3.773585 | 1  | 2   | 1  | 41.988 | 6.02  | 400000   | 270000   |          | 4.231016 |
| P68033 | Actin, alpha cardiac muscle 1 OS=Mus musculus GN=Actc1 PE=1 SV=1                            | 43.23607 | 18 | 198 | 4  | 41.992 | 5.39  | 1.3E+08  | 1.5E+08  | 1.5E+08  | 511.6285 |
| P21278 | Guanine nucleotide-binding protein subunit alpha-11 OS=Mus musculus GN=Gna11 PE=1 SV=1      | 16.71309 | 5  | 9   | 2  | 41.997 | 5.97  | 1000000  | 1200000  | 630000   | 23.45828 |
| Q9JKV1 | Proteasomal ubiquitin receptor ADRM1 OS=Mus musculus GN=Adrm1 PE=1 SV=2                     | 8.599509 | 2  | 7   | 2  | 42.034 | 5.07  | 5800000  | 3100000  | 2600000  | 20.03599 |
| Q61112 | 45 kDa calcium-binding protein OS=Mus musculus GN=Sdf4 PE=1 SV=1                            | 3.601108 | 1  | 2   | 1  | 42.037 | 4.96  | 1700000  |          | 1700000  | 5.838755 |
| Q9DCE5 | p21-activated protein kinase-interacting protein 1 OS=Mus musculus GN=Pak1ip1 PE=1 SV=2     | 6.544503 | 2  | 4   | 2  | 42.089 | 8.47  | 2400000  | 2400000  | 1800000  | 13.40377 |
| P15105 | Glutamine synthetase OS=Mus musculus GN=Glul PE=1 SV=6                                      | 26.27346 | 7  | 19  | 7  | 42.092 | 7.08  | 15000000 | 10000000 | 8800000  | 61.23182 |
| Q61048 | WW domain-binding protein 4 OS=Mus musculus GN=Wb4 PE=1 SV=4                                | 3.191489 | 1  | 2   | 1  | 42.111 | 7.36  | 1000000  | 1800000  |          | 4.530951 |
| P21279 | Guanine nucleotide-binding protein G(q) subunit alpha OS=Mus musculus GN=Gnaq PE=1 SV=4     | 20.05571 | 6  | 14  | 3  | 42.131 | 5.68  | 4200000  | 1900000  | 2200000  | 36.28956 |
| P55302 | Alpha-2-macroglobulin receptor-associated protein OS=Mus musculus GN=Lrpap1 PE=1 SV=1       | 10.55556 | 3  | 8   | 3  | 42.189 | 7.87  | 2300000  | 2000000  | 2300000  | 24.14184 |



|        |                                                                                                                   |          |    |    |    |        |       |          |          |          |          |
|--------|-------------------------------------------------------------------------------------------------------------------|----------|----|----|----|--------|-------|----------|----------|----------|----------|
| Q9QXY9 | Peroxisomal biogenesis factor 3 OS=Mus musculus GN=Pex3 PE=1 SV=1                                                 | 2.688172 | 1  | 2  | 1  | 42.197 | 7.77  |          |          |          | 5.459937 |
| Q8BVQ5 | Protein phosphatase methylesterase 1 OS=Mus musculus GN=Ppme1 PE=1 SV=5                                           | 3.108808 | 1  | 2  | 1  | 42.229 | 5.97  |          | 330000   | 760000   | 4.851942 |
| Q8R5C5 | Beta-centractin OS=Mus musculus GN=Actr1b PE=1 SV=1                                                               | 17.28723 | 5  | 9  | 1  | 42.255 | 6.4   |          | 3000000  | 2200000  | 25.34994 |
| Q9WV02 | RNA-binding motif protein, X chromosome OS=Mus musculus GN=Rbmx PE=1 SV=1                                         | 17.13555 | 6  | 15 | 6  | 42.275 | 10.05 | 21000000 | 25000000 | 16000000 | 37.36424 |
| P39749 | Flap endonuclease 1 OS=Mus musculus GN=Fen1 PE=1 SV=1                                                             | 10.05291 | 3  | 9  | 3  | 42.288 | 8.34  | 4300000  | 7100000  | 7400000  | 30.97718 |
| Q9EPC1 | Alpha-parvin OS=Mus musculus GN=Parva PE=1 SV=1                                                                   | 11.02151 | 3  | 8  | 2  | 42.304 | 5.95  | 3600000  | 3100000  | 2400000  | 27.86357 |
| Q9JJA9 | General receptor for phosphoinositides 1-associated scaffold protein OS=Mus musculus GN=Grasp PE=1 SV=2           | 1.785714 | 1  | 1  | 1  | 42.311 | 9.1   |          | 3900000  |          | 2.450954 |
| P11928 | 2'-5'-oligoadenylate synthase 1A OS=Mus musculus GN=Oas1a PE=1 SV=2                                               | 25.3406  | 7  | 17 | 7  | 42.402 | 8.09  | 7200000  | 6000000  | 6500000  | 48.28705 |
| P49443 | Protein phosphatase 1A OS=Mus musculus GN=Ppm1a PE=1 SV=1                                                         | 4.712042 | 1  | 1  | 1  | 42.406 | 5.36  | 2200000  |          |          | 2.853265 |
| Q9JIF0 | Protein arginine N-methyltransferase 1 OS=Mus musculus GN=Prmt1 PE=1 SV=1                                         | 10.78167 | 4  | 10 | 4  | 42.408 | 5.43  | 10000000 | 9500000  | 8400000  | 27.58548 |
| P18572 | Basigin OS=Mus musculus GN=Bsg PE=1 SV=2                                                                          | 18.76607 | 6  | 21 | 6  | 42.418 | 5.85  | 16000000 | 13000000 | 12000000 | 62.20904 |
| Q9DC69 | NADH dehydrogenase [ubiquinone] 1 alpha subcomplex subunit 9, mitochondrial OS=Mus musculus GN=Ndufa9 PE=1 SV=2   | 5.30504  | 2  | 6  | 2  | 42.498 | 9.74  | 3600000  | 4800000  | 2400000  | 15.17329 |
| Q9DBZ1 | Inhibitor of nuclear factor kappa-B kinase-interacting protein OS=Mus musculus GN=Ikkip PE=1 SV=2                 | 11.52815 | 4  | 7  | 4  | 42.505 | 5.1   | 3800000  | 2400000  | 2200000  | 20.92715 |
| Q91V12 | Cytosolic acyl coenzyme A thioester hydrolase OS=Mus musculus GN=Acot7 PE=1 SV=2                                  | 3.149606 | 1  | 2  | 1  | 42.51  | 8.68  | 1700000  |          | 1200000  | 5.855264 |
| P19426 | Negative elongation factor E OS=Mus musculus GN=Nelfe PE=1 SV=2                                                   | 13.33333 | 3  | 3  | 3  | 42.528 | 9.38  | 1100000  | 1100000  |          | 9.290947 |
| P61164 | Alpha-centractin OS=Mus musculus GN=Actr1a PE=1 SV=1                                                              | 15.69149 | 5  | 9  | 1  | 42.587 | 6.64  | 2400000  | 460000   | 780000   | 23.98668 |
| Q8BHS6 | Armado repeat-containing X-linked protein 3 OS=Mus musculus GN=Armcx3 PE=1 SV=1                                   | 4.485488 | 1  | 3  | 1  | 42.593 | 8.68  | 570000   | 620000   | 680000   | 8.474073 |
| Q35730 | E3 ubiquitin-protein ligase RING1 OS=Mus musculus GN=Ring1 PE=1 SV=2                                              | 12.80788 | 3  | 7  | 3  | 42.604 | 5.74  | 470000   | 750000   | 790000   | 25.21896 |
| Q8VCG3 | WD repeat-containing protein 74 OS=Mus musculus GN=Wdr74 PE=1 SV=1                                                | 9.635417 | 3  | 5  | 3  | 42.61  | 7.78  | 1200000  | 250000   |          | 11.89291 |
| Q78ZA7 | Nucleosome assembly protein 1-like 4 OS=Mus musculus GN=Nap1l4 PE=1 SV=1                                          | 12.26667 | 3  | 8  | 2  | 42.653 | 4.67  | 6500000  | 4500000  | 4100000  | 24.59047 |
| Q04447 | Creatine kinase B-type OS=Mus musculus GN=Ckb PE=1 SV=1                                                           | 37.27034 | 12 | 56 | 12 | 42.686 | 5.67  | 83000000 | 55000000 | 68000000 | 191.0006 |
| Q8VDV3 | Guanine nucleotide exchange factor for Rab-3A OS=Mus musculus GN=Rab3il1 PE=1 SV=1                                | 8.093995 | 1  | 1  | 1  | 42.686 | 6.38  |          |          |          | 2.192412 |
| P70274 | Selenoprotein P OS=Mus musculus GN=Sepp1 PE=1 SV=3                                                                | 2.105263 | 1  | 1  | 1  | 42.689 | 7.09  | 260000   |          |          | 1.818849 |
| Q8R464 | Cell adhesion molecule 4 OS=Mus musculus GN=Cadm4 PE=1 SV=1                                                       | 8.505155 | 2  | 3  | 2  | 42.697 | 6.3   | 1000000  | 3400000  | 3500000  | 11.91591 |
| Q9Z2Q6 | Septin-5 OS=Mus musculus GN=Sept5 PE=1 SV=2                                                                       | 18.15718 | 5  | 14 | 5  | 42.721 | 6.67  | 7800000  | 4300000  | 3900000  | 41.76708 |
| Q99J95 | Cyclin-dependent kinase 9 OS=Mus musculus GN=Cdk9 PE=1 SV=1                                                       | 8.333333 | 3  | 10 | 2  | 42.734 | 8.79  | 760000   | 440000   | 570000   | 25.31774 |
| P70404 | Isocitrate dehydrogenase [NAD] subunit gamma 1, mitochondrial OS=Mus musculus GN=Idh3g PE=1 SV=1                  | 7.888041 | 2  | 5  | 2  | 42.758 | 9.01  | 5100000  | 2300000  | 6000000  | 13.80859 |
| Q9WVJ2 | 26S proteasome non-ATPase regulatory subunit 13 OS=Mus musculus GN=Psm13 PE=1 SV=1                                | 12.5     | 4  | 8  | 4  | 42.782 | 5.71  | 3500000  | 1500000  | 2100000  | 20.19292 |
| Q3TBT3 | Stimulator of interferon genes protein OS=Mus musculus GN=Tmem173 PE=1 SV=2                                       | 12.43386 | 3  | 7  | 3  | 42.802 | 7.42  | 4800000  | 5200000  |          | 22.13957 |
| Q99M51 | Cytoplasmic protein NCK1 OS=Mus musculus GN=Nck1 PE=1 SV=1                                                        | 5.039788 | 2  | 5  | 2  | 42.863 | 6.47  | 1000000  | 1100000  | 1100000  | 11.73416 |
| Q99N28 | Cell adhesion molecule 3 OS=Mus musculus GN=Cadm3 PE=1 SV=1                                                       | 6.565657 | 2  | 5  | 2  | 42.938 | 5.8   | 4100000  | 1900000  | 1500000  | 19.54998 |
| P23242 | Gap junction alpha-1 protein OS=Mus musculus GN=Gja1 PE=1 SV=2                                                    | 14.92147 | 3  | 6  | 3  | 42.977 | 8.76  | 1700000  | 1100000  | 1200000  | 16.75455 |
| Q8QZ51 | 3-hydroxyisobutyryl-CoA hydrolase, mitochondrial OS=Mus musculus GN=Hibch PE=1 SV=1                               | 3.116883 | 1  | 1  | 1  | 43.01  | 8.06  |          |          | 1400000  | 3.126658 |
| Q91V04 | Translocating chain-associated membrane protein 1 OS=Mus musculus GN=Tram1 PE=1 SV=3                              | 5.080214 | 1  | 3  | 1  | 43.012 | 9.69  | 900000   | 1300000  | 1200000  | 11.40466 |
| P07310 | Creatine kinase M-type OS=Mus musculus GN=Ckm PE=1 SV=1                                                           | 20.47244 | 7  | 10 | 7  | 43.018 | 7.06  | 1300000  |          | 6300000  | 24.1171  |
| Q9CXV6 | Interleukin enhancer-binding factor 2 OS=Mus musculus GN=Ilf2 PE=1 SV=1                                           | 18.97436 | 4  | 8  | 4  | 43.035 | 5.26  | 1900000  | 2300000  | 2400000  | 25.90227 |
| Q63844 | Mitogen-activated protein kinase 3 OS=Mus musculus GN=Mapk3 PE=1 SV=5                                             | 14.73684 | 6  | 12 | 4  | 43.039 | 6.61  | 1400000  | 1400000  | 1700000  | 30.42719 |
| Q76KJ5 | DNA-directed RNA polymerase I subunit RPA34 OS=Mus musculus GN=Cd3eap PE=1 SV=2                                   | 4.260652 | 1  | 1  | 1  | 43.055 | 9.61  |          | 220000   |          | 2.336489 |
| Q62465 | Synaptic vesicle membrane protein VAT-1 homolog OS=Mus musculus GN=Vat1 PE=1 SV=3                                 | 9.852217 | 3  | 7  | 3  | 43.069 | 6.37  | 3300000  | 3000000  | 2800000  | 23.26929 |
| Q91W92 | Cdc42 effector protein 1 OS=Mus musculus GN=Cdc42ep1 PE=1 SV=1                                                    | 3.91198  | 1  | 2  | 1  | 43.069 | 7.21  | 970000   | 830000   |          | 5.366867 |
| Q8K0G5 | Protein TSSC1 OS=Mus musculus GN=Eipr1 PE=1 SV=2                                                                  | 4.92228  | 1  | 1  | 1  | 43.1   | 5.14  |          | 480000   |          | 3.449553 |
| Q8K2C9 | Very-long-chain (3R)-3-hydroxyacyl-CoA dehydratase 3 OS=Mus musculus GN=Hacd3 PE=1 SV=2                           | 8.563536 | 3  | 8  | 3  | 43.103 | 9.13  | 5700000  | 1800000  | 5200000  | 22.73722 |
| P02340 | Cellular tumor antigen p53 OS=Mus musculus GN=Tp53 PE=1 SV=3                                                      | 3.359173 | 1  | 3  | 1  | 43.127 | 7.23  | 1600000  | 180000   | 1600000  | 8.514143 |
| Q7TNV0 | Protein DEK OS=Mus musculus GN=Dek PE=1 SV=1                                                                      | 17.63158 | 6  | 21 | 6  | 43.132 | 6.86  | 16000000 | 16000000 | 15000000 | 60.51596 |
| Q924Z5 | Translocating chain-associated membrane protein 2 OS=Mus musculus GN=Tram2 PE=1 SV=1                              | 2.702703 | 1  | 1  | 1  | 43.155 | 9.39  |          |          | 1300000  | 2.126964 |
| Q9DBC7 | cAMP-dependent protein kinase type I-alpha regulatory subunit OS=Mus musculus GN=Prkar1a PE=1 SV=3                | 17.5853  | 5  | 10 | 4  | 43.158 | 5.35  | 6800000  | 6300000  | 3700000  | 27.38286 |
| Q6NTA4 | Ras-related GTP-binding protein B OS=Mus musculus GN=Rragb PE=1 SV=1                                              | 2.673797 | 1  | 2  | 1  | 43.164 | 6.38  | 2200000  | 1900000  |          | 4.435689 |
| Q9CQE7 | Endoplasmic reticulum-Golgi intermediate compartment protein 3 OS=Mus musculus GN=Ergic3 PE=1 SV=1                | 9.921671 | 3  | 3  | 3  | 43.181 | 6.47  | 1000000  | 770000   |          | 7.950351 |
| P00158 | Cytochrome b OS=Mus musculus GN=Mt-Cyb PE=1 SV=1                                                                  | 2.362205 | 1  | 1  | 1  | 43.181 | 7.97  |          | 590000   |          | 1.855096 |
| Q8BP48 | Methionine aminopeptidase 1 OS=Mus musculus GN=Metap1 PE=1 SV=1                                                   | 2.849741 | 1  | 1  | 1  | 43.193 | 7.17  | 1000000  |          |          | 2.321111 |
| P12849 | cAMP-dependent protein kinase type I-beta regulatory subunit OS=Mus musculus GN=Prkar1b PE=1 SV=2                 | 5.511811 | 2  | 4  | 1  | 43.197 | 5.96  | 1000000  |          |          | 9.847291 |
| P35486 | Pyruvate dehydrogenase E1 component subunit alpha, somatic form, mitochondrial OS=Mus musculus GN=Pdha1 PE=1 SV=1 | 18.71795 | 7  | 24 | 7  | 43.204 | 8.19  | 27000000 | 14000000 | 17000000 | 65.30573 |
| Q9JIT9 | Phosphorylated adapter RNA export protein OS=Mus musculus GN=Phax PE=1 SV=1                                       | 2.857143 | 1  | 2  | 1  | 43.221 | 5.34  | 1100000  | 1500000  |          | 5.322866 |



|        |                                                                                                                          |          |    |    |    |        |       |          |          |          |          |
|--------|--------------------------------------------------------------------------------------------------------------------------|----------|----|----|----|--------|-------|----------|----------|----------|----------|
| Q8VDQ8 | NAD-dependent protein deacetylase sirtuin-2 OS=Mus musculus GN=Sirt2 PE=1 SV=2                                           | 9.254499 | 2  | 4  | 2  | 43.228 | 5.35  | 7200000  | 2200000  | 2100000  | 15.04614 |
| Q9WUR2 | Enoyl-CoA delta isomerase 2, mitochondrial OS=Mus musculus GN=Eci2 PE=1 SV=2                                             | 3.069054 | 1  | 1  | 1  | 43.24  | 8.92  |          | 2100000  |          | 2.40204  |
| Q9D517 | 1-acyl-sn-glycerol-3-phosphate acyltransferase gamma OS=Mus musculus GN=Agpat3 PE=1 SV=2                                 | 2.393617 | 1  | 1  | 1  | 43.268 | 8.51  |          |          | 2300000  | 1.976639 |
| Q8OX73 | Protein pelota homolog OS=Mus musculus GN=Pelo PE=1 SV=3                                                                 | 6.493506 | 2  | 4  | 2  | 43.322 | 5.99  | 370000   | 750000   | 570000   | 9.607926 |
| Q91VL8 | Telomeric repeat-binding factor 2-interacting protein 1 OS=Mus musculus GN=Terf2ip PE=1 SV=1                             | 4.071247 | 1  | 2  | 1  | 43.326 | 4.81  |          | 190000   | 690000   | 4.968033 |
| P70318 | Nucleolysin TIAR OS=Mus musculus GN=Tial1 PE=1 SV=1                                                                      | 2.806122 | 1  | 1  | 1  | 43.361 | 7.99  | 1400000  |          |          | 1.964885 |
| Q9JX6  | P2X purinoceptor 4 OS=Mus musculus GN=P2rx4 PE=1 SV=1                                                                    | 3.865979 | 1  | 2  | 1  | 43.41  | 7.99  | 2100000  |          | 950000   | 6.429245 |
| P31938 | Dual specificity mitogen-activated protein kinase kinase 1 OS=Mus musculus GN=Map2k1 PE=1 SV=2                           | 6.615776 | 3  | 6  | 3  | 43.446 | 6.7   | 1300000  | 1200000  | 440000   | 15.71428 |
| Q99N69 | Leupaxin OS=Mus musculus GN=Lpxn PE=1 SV=2                                                                               | 6.735751 | 1  | 1  | 1  | 43.45  | 6.43  |          |          | 470000   | 2.240121 |
| Q9Z2E1 | Methyl-CpG-binding domain protein 2 OS=Mus musculus GN=Mbd2 PE=2 SV=2                                                    | 2.415459 | 1  | 3  | 1  | 43.474 | 10.04 | 1300000  | 1200000  | 1400000  | 6.463597 |
| P54728 | UV excision repair protein RAD23 homolog B OS=Mus musculus GN=Rad23b PE=1 SV=2                                           | 2.163462 | 1  | 1  | 1  | 43.486 | 4.83  |          | 1500000  |          | 2.337149 |
| O35465 | Peptidyl-prolyl cis-trans isomerase FKBP8 OS=Mus musculus GN=Fkbp8 PE=1 SV=2                                             | 15.17413 | 4  | 13 | 4  | 43.501 | 5.16  | 5100000  | 4400000  | 4300000  | 43.42136 |
| Q8BGA5 | KRR1 small subunit processome component homolog OS=Mus musculus GN=Krr1 PE=2 SV=1                                        | 13.68421 | 4  | 9  | 4  | 43.511 | 9.79  | 1400000  | 2000000  | 1500000  | 25.72881 |
| P62881 | Guanine nucleotide-binding protein subunit beta-5 OS=Mus musculus GN=Gnb5 PE=1 SV=1                                      | 9.367089 | 2  | 2  | 2  | 43.537 | 6.46  |          | 1700000  | 1100000  | 6.702231 |
| Q3TH56 | S-adenosylmethionine synthase isoform type-2 OS=Mus musculus GN=Mat2a PE=1 SV=2                                          | 12.91139 | 3  | 5  | 3  | 43.661 | 6.48  | 5800000  | 3300000  | 3200000  | 17.35805 |
| P50580 | Proliferation-associated protein 2G4 OS=Mus musculus GN=Pa2g4 PE=1 SV=3                                                  | 39.08629 | 13 | 48 | 13 | 43.671 | 6.86  | 31000000 | 32000000 | 27000000 | 137.896  |
| Q91XD6 | Vacuolar protein-sorting-associated protein 36 OS=Mus musculus GN=Vps36 PE=1 SV=1                                        | 8.031088 | 3  | 8  | 3  | 43.708 | 7.15  | 1500000  | 1300000  | 1300000  | 20.75456 |
| Q08288 | Cell growth-regulating nucleolar protein OS=Mus musculus GN=Lyar PE=1 SV=2                                               | 21.13402 | 5  | 11 | 5  | 43.709 | 9.5   | 3800000  | 3300000  | 1200000  | 36.3269  |
| Q9ER38 | Torsin-3A OS=Mus musculus GN=Tor3a PE=1 SV=2                                                                             | 11.16883 | 4  | 8  | 4  | 43.785 | 6.28  | 1600000  | 390000   | 1400000  | 21.10971 |
| P11438 | Lysosome-associated membrane glycoprotein 1 OS=Mus musculus GN=Lamp1 PE=1 SV=2                                           | 8.374384 | 3  | 12 | 3  | 43.837 | 8.4   | 25000000 | 23000000 | 15000000 | 39.92233 |
| A2RTL5 | Arginine/serine-rich coiled-coil protein 2 OS=Mus musculus GN=Rsrc2 PE=2 SV=1                                            | 2.659574 | 1  | 1  | 1  | 43.85  | 11.46 |          |          | 760000   | 2.283496 |
| Q9Z1G3 | V-type proton ATPase subunit C 1 OS=Mus musculus GN=Atp6v1c1 PE=1 SV=4                                                   | 18.06283 | 7  | 17 | 7  | 43.86  | 7.46  | 5100000  | 4700000  | 3900000  | 47.12652 |
| Q9CY14 | Putative RNA-binding protein Luc7-like 1 OS=Mus musculus GN=Luc7l PE=1 SV=2                                              | 16.17251 | 5  | 12 | 2  | 43.907 | 9.88  | 2900000  | 1000000  | 1000000  | 37.05273 |
| Q921H8 | 3-ketoacyl-CoA thiolase A, peroxisomal OS=Mus musculus GN=Acaa1a PE=1 SV=1                                               | 8.962264 | 2  | 5  | 2  | 43.926 | 8.44  | 2600000  | 890000   | 1900000  | 16.33055 |
| O54724 | Polymerase I and transcript release factor OS=Mus musculus GN=Ptrf PE=1 SV=1                                             | 20.15306 | 5  | 13 | 5  | 43.927 | 5.52  | 3100000  | 1900000  | 3000000  | 45.3635  |
| Q80YQ8 | Protein RMD5 homolog A OS=Mus musculus GN=Rmnd5a PE=1 SV=2                                                               | 2.813299 | 1  | 1  | 1  | 43.964 | 6.06  |          |          | 500000   | 2.287555 |
| P27601 | Guanine nucleotide-binding protein subunit alpha-13 OS=Mus musculus GN=Gna13 PE=1 SV=1                                   | 17.77188 | 6  | 19 | 5  | 44.027 | 8.21  | 4900000  | 4300000  | 3700000  | 41.68381 |
| P47809 | Dual specificity mitogen-activated protein kinase kinase 4 OS=Mus musculus GN=Map2k4 PE=1 SV=2                           | 3.02267  | 1  | 1  | 1  | 44.085 | 8.07  |          | 670000   |          | 2.085501 |
| Q99KJ8 | Dynactin subunit 2 OS=Mus musculus GN=Dctn2 PE=1 SV=3                                                                    | 22.88557 | 6  | 14 | 6  | 44.09  | 5.26  | 3800000  | 4000000  | 2900000  | 42.7461  |
| Q99K70 | Ras-related GTP-binding protein C OS=Mus musculus GN=Rragc PE=1 SV=1                                                     | 11.80905 | 4  | 9  | 4  | 44.093 | 5.1   | 2600000  | 3000000  | 1900000  | 26.8125  |
| Q61187 | Tumor susceptibility gene 101 protein OS=Mus musculus GN=Tsg101 PE=1 SV=2                                                | 14.32225 | 4  | 6  | 4  | 44.096 | 6.71  | 2100000  | 2200000  | 1800000  | 16.90914 |
| Q9Z0H3 | SWI/SNF-related matrix-associated actin-dependent regulator of chromatin subfamily B member 1 OS=Mus musculus GN=Smarca4 | 11.16883 | 3  | 12 | 3  | 44.113 | 6.23  | 2600000  | 2200000  | 2500000  | 40.645   |
| P62334 | 26S protease regulatory subunit 10B OS=Mus musculus GN=Psmc6 PE=1 SV=1                                                   | 21.33676 | 7  | 18 | 7  | 44.145 | 7.49  | 5900000  | 4900000  | 4100000  | 48.51243 |
| Q61103 | Zinc finger protein ubi-d4 OS=Mus musculus GN=Dpf2 PE=1 SV=1                                                             | 9.71867  | 2  | 3  | 2  | 44.201 | 6.47  |          | 2900000  | 1800000  | 8.810675 |
| P01867 | Ig gamma-2B chain C region OS=Mus musculus GN=Igh-3 PE=1 SV=3                                                            | 8.168317 | 2  | 2  | 2  | 44.231 | 6.52  |          | 3700000  |          | 5.678185 |
| Q91XA2 | Golgi membrane protein 1 OS=Mus musculus GN=Golm1 PE=1 SV=2                                                              | 3.816794 | 1  | 2  | 1  | 44.299 | 5.27  |          | 920000   | 620000   | 6.224717 |
| Q9QY24 | Z-DNA-binding protein 1 OS=Mus musculus GN=Zbp1 PE=1 SV=1                                                                | 19.22141 | 4  | 9  | 4  | 44.304 | 5.8   | 810000   | 900000   | 520000   | 25.29016 |
| P70429 | Ena/VASP-like protein OS=Mus musculus GN=Evl PE=1 SV=2                                                                   | 14.49275 | 5  | 17 | 5  | 44.31  | 8.85  | 2900000  | 3400000  | 2500000  | 61.13819 |
| Q8QZY9 | Splicing factor 3B subunit 4 OS=Mus musculus GN=Sf3b4 PE=1 SV=1                                                          | 3.301887 | 1  | 3  | 1  | 44.327 | 8.56  | 9400000  | 8400000  | 8600000  | 10.99886 |
| P97300 | Neuroplastin OS=Mus musculus GN=Nptn PE=1 SV=3                                                                           | 10.83123 | 4  | 11 | 4  | 44.345 | 7.74  | 15000000 | 8000000  | 8100000  | 29.25286 |
| Q8BIZ6 | Smad nuclear-interacting protein 1 OS=Mus musculus GN=Snip1 PE=1 SV=1                                                    | 3.133159 | 1  | 1  | 1  | 44.389 | 9.89  |          |          |          | 1.973805 |
| Q9CY10 | Protein Njmu-R1 OS=Mus musculus PE=1 SV=2                                                                                | 3.562341 | 1  | 1  | 1  | 44.394 | 5.05  | 320000   |          |          | 2.424721 |
| Q9DBY5 | Chromobox protein homolog 6 OS=Mus musculus GN=Cbx6 PE=1 SV=2                                                            | 4.589372 | 1  | 2  | 1  | 44.432 | 9.96  | 300000   | 190000   |          | 6.070963 |
| Q8R3V5 | Endophilin-B2 OS=Mus musculus GN=Sh3glb2 PE=1 SV=2                                                                       | 5.25     | 2  | 6  | 1  | 44.476 | 5.82  | 3500000  |          | 1500000  | 15.27497 |
| Q921F2 | TAR DNA-binding protein 43 OS=Mus musculus GN=Tardbp PE=1 SV=1                                                           | 23.18841 | 10 | 30 | 10 | 44.519 | 6.7   | 20000000 | 19000000 | 19000000 | 89.52348 |
| P09411 | Phosphoglycerate kinase 1 OS=Mus musculus GN=Pgk1 PE=1 SV=4                                                              | 57.07434 | 17 | 41 | 17 | 44.522 | 7.9   | 17000000 | 14000000 | 12000000 | 134.3919 |
| Q9D646 | Keratin, type I cuticular Ha4 OS=Mus musculus GN=Krt34 PE=2 SV=1                                                         | 38.52041 | 17 | 46 | 1  | 44.531 | 4.79  | 4000000  | 7400000  | 12000000 | 117.4456 |
| A2ADY9 | Protein DDI1 homolog 2 OS=Mus musculus GN=DDi2 PE=1 SV=1                                                                 | 2.255639 | 1  | 1  | 1  | 44.562 | 5.05  | 1200000  |          |          | 2.574224 |
| Q61081 | Hsp90 co-chaperone Cdc37 OS=Mus musculus GN=Cdc37 PE=1 SV=1                                                              | 24.53826 | 7  | 17 | 7  | 44.565 | 5.34  | 13000000 | 13000000 | 11000000 | 52.514   |
| Q09014 | Neutrophil cytosol factor 1 OS=Mus musculus GN=Ncf1 PE=1 SV=3                                                            | 7.179487 | 2  | 6  | 2  | 44.639 | 9.01  |          | 1300000  | 1500000  | 19.10521 |
| Q9WV54 | Acid ceramidase OS=Mus musculus GN=Asah1 PE=1 SV=1                                                                       | 9.390863 | 4  | 6  | 4  | 44.641 | 8.46  | 3000000  | 3000000  | 5200000  | 14.84342 |
| Q9Z0W1 | Tumor necrosis factor receptor superfamily member 16 OS=Mus musculus GN=Ngfr PE=1 SV=1                                   | 16.30695 | 3  | 6  | 3  | 44.657 | 4.64  | 1100000  | 1000000  | 710000   | 15.71994 |
| Q9CY58 | Plasminogen activator inhibitor 1 RNA-binding protein OS=Mus musculus GN=Serbp1 PE=1 SV=2                                | 34.88943 | 11 | 39 | 11 | 44.687 | 8.54  | 9500000  | 14000000 | 8600000  | 119.3594 |

|        |                                                                                                       |           |    |    |    |        |       |          |          |          |          |
|--------|-------------------------------------------------------------------------------------------------------|-----------|----|----|----|--------|-------|----------|----------|----------|----------|
| Q00899 | Transcriptional repressor protein YY1 OS=Mus musculus GN=Yy1 PE=1 SV=1                                | 6.521739  | 2  | 5  | 2  | 44.689 | 6.29  | 2500000  | 2600000  | 2000000  | 18.63159 |
| Q8K339 | DNA/RNA-binding protein KIN17 OS=Mus musculus GN=Kin PE=1 SV=1                                        | 6.393862  | 2  | 3  | 2  | 44.694 | 9.04  | 1400000  |          | 910000   | 9.283685 |
| Q9CZ30 | Obg-like ATPase 1 OS=Mus musculus GN=Ola1 PE=1 SV=1                                                   | 8.838384  | 4  | 7  | 4  | 44.701 | 7.81  | 1700000  | 2200000  | 2200000  | 14.908   |
| P61161 | Actin-related protein 2 OS=Mus musculus GN=Actr2 PE=1 SV=1                                            | 26.14213  | 9  | 30 | 9  | 44.732 | 6.74  | 32000000 | 19000000 | 23000000 | 85.95263 |
| Q9DBS1 | Transmembrane protein 43 OS=Mus musculus GN=Tmem43 PE=1 SV=1                                          | 5.5       | 2  | 5  | 2  | 44.755 | 7.36  | 5600000  | 5900000  | 4900000  | 12.10658 |
| Q8VE47 | Ubiquitin-like modifier-activating enzyme 5 OS=Mus musculus GN=Uba5 PE=1 SV=2                         | 5.953335  | 2  | 3  | 2  | 44.761 | 4.96  | 980000   | 670000   | 400000   | 6.525517 |
| Q8QZT1 | Acetyl-CoA acetyltransferase, mitochondrial OS=Mus musculus GN=Acat1 PE=1 SV=1                        | 21.46226  | 7  | 23 | 7  | 44.787 | 8.51  | 12000000 | 9600000  | 7100000  | 82.33775 |
| P63037 | DnaJ homolog subfamily A member 1 OS=Mus musculus GN=Dnaja1 PE=1 SV=1                                 | 24.93703  | 6  | 18 | 6  | 44.839 | 7.08  | 12000000 | 10000000 | 9200000  | 61.75827 |
| P26151 | High affinity immunoglobulin gamma Fc receptor I OS=Mus musculus GN=Fcgr1 PE=1 SV=1                   | 4.455446  | 1  | 2  | 1  | 44.86  | 6.09  | 840000   |          | 580000   | 5.433373 |
| Q07417 | Short-chain specific acyl-CoA dehydrogenase, mitochondrial OS=Mus musculus GN=Acads PE=1 SV=2         | 11.40777  | 3  | 5  | 3  | 44.861 | 8.47  | 2300000  | 1800000  | 2100000  | 16.09083 |
| Q9CXY9 | GPI-anchor transamidase OS=Mus musculus GN=Pigk PE=1 SV=2                                             | 2.78481   | 1  | 2  | 1  | 44.867 | 6.54  | 810000   | 520000   |          | 4.34373  |
| Q9D7N3 | 28S ribosomal protein S9, mitochondrial OS=Mus musculus GN=Mrps9 PE=1 SV=3                            | 2.820513  | 1  | 1  | 1  | 44.901 | 8.81  | 1700000  |          |          | 3.21515  |
| Q8VE37 | Regulator of chromosome condensation OS=Mus musculus GN=Rcc1 PE=1 SV=1                                | 18.52732  | 6  | 14 | 6  | 44.903 | 8.1   | 4800000  | 5400000  | 4900000  | 36.2954  |
| P18242 | Cathepsin D OS=Mus musculus GN=Ctsd PE=1 SV=1                                                         | 15.609676 | 5  | 15 | 5  | 44.925 | 7.15  | 9300000  | 1500000  | 6100000  | 43.04566 |
| Q3THG9 | Alanyl-tRNA editing protein Aarsd1 OS=Mus musculus GN=Aarsd1 PE=1 SV=2                                | 3.15534   | 1  | 3  | 1  | 44.943 | 6.42  | 2700000  | 1700000  | 1600000  | 8.849759 |
| Q9CY18 | Sorting nexin-7 OS=Mus musculus GN=Snx7 PE=1 SV=1                                                     | 3.100775  | 1  | 3  | 1  | 44.971 | 5.07  | 710000   | 750000   | 520000   | 8.058148 |
| Q924Z4 | Ceramide synthase 2 OS=Mus musculus GN=Cers2 PE=1 SV=1                                                | 2.368421  | 1  | 3  | 1  | 44.995 | 8.75  | 11000000 | 9500000  | 10000000 | 7.96061  |
| Q8K2M0 | 39S ribosomal protein L38, mitochondrial OS=Mus musculus GN=Mrpl38 PE=1 SV=2                          | 9.473684  | 2  | 2  | 2  | 45.002 | 8.1   | 190000   |          |          | 5.484147 |
| Q8BUB4 | WD repeat and FYVE domain-containing protein 2 OS=Mus musculus GN=Wdfy2 PE=1 SV=2                     | 4         | 1  | 1  | 1  | 45.065 | 6.81  |          |          | 620000   | 2.744879 |
| Q3URS9 | Coiled-coil domain-containing protein 51 OS=Mus musculus GN=Ccdc51 PE=1 SV=1                          | 2.70936   | 1  | 1  | 1  | 45.104 | 8.09  | 440000   |          |          | 3.479792 |
| Q60737 | Casein kinase II subunit alpha OS=Mus musculus GN=Csnk2a1 PE=1 SV=2                                   | 18.92583  | 6  | 13 | 6  | 45.105 | 7.74  | 6800000  | 3100000  | 4100000  | 34.96343 |
| Q8CGE8 | Interferon-activable protein 205-A OS=Mus musculus GN=Ifi205a PE=2 SV=1                               | 19.30693  | 6  | 14 | 4  | 45.148 | 8.48  | 4100000  | 2700000  | 3200000  | 38.16839 |
| Q80TL4 | PHD finger protein 24 OS=Mus musculus GN=Phf24 PE=1 SV=2                                              | 13        | 4  | 10 | 4  | 45.194 | 5.77  | 1900000  | 2100000  | 2300000  | 32.65655 |
| Q99LR1 | Monoacylglycerol lipase ABHD12 OS=Mus musculus GN=Abhd12 PE=1 SV=2                                    | 19.34673  | 6  | 12 | 6  | 45.241 | 8.72  | 2400000  | 2100000  | 770000   | 41.16998 |
| Q9EPJ9 | ADP-ribosylation factor GTPase-activating protein 1 OS=Mus musculus GN=Arfgap1 PE=1 SV=2              | 29.4686   | 7  | 18 | 7  | 45.26  | 5.57  | 3800000  | 3300000  | 2600000  | 60.15283 |
| Q8JZX4 | Splicing factor 45 OS=Mus musculus GN=Rbm17 PE=1 SV=1                                                 | 20.74074  | 7  | 17 | 6  | 45.276 | 5.82  | 3700000  | 3700000  | 3200000  | 44.23628 |
| O89112 | LanC-like protein 1 OS=Mus musculus GN=Lanc1 PE=1 SV=1                                                | 5.764411  | 2  | 4  | 2  | 45.312 | 7.77  | 2600000  | 4000000  | 2900000  | 11.09117 |
| P28656 | Nucleosome assembly protein 1-like 1 OS=Mus musculus GN=Nap1l1 PE=1 SV=2                              | 11.50895  | 3  | 8  | 2  | 45.317 | 4.46  | 3800000  | 2000000  | 8000000  | 25.88147 |
| Q9JL35 | High mobility group nucleosome-binding domain-containing protein 5 OS=Mus musculus GN=Hmgn5 PE=1 SV=2 | 7.635468  | 2  | 6  | 2  | 45.317 | 4.37  | 2000000  | 1300000  | 790000   | 18.27349 |
| Q80VD1 | Protein FAM98B OS=Mus musculus GN=Fam98b PE=1 SV=1                                                    | 8.857809  | 3  | 6  | 3  | 45.321 | 8.5   | 2800000  | 3100000  | 1400000  | 18.99146 |
| P12367 | cAMP-dependent protein kinase type II-alpha regulatory subunit OS=Mus musculus GN=Prkar2a PE=1 SV=2   | 4.987531  | 1  | 2  | 1  | 45.361 | 4.89  | 5000000  |          | 4900000  | 8.352031 |
| Q99JH4 | 26S proteasome non-ATPase regulatory subunit 6 OS=Mus musculus GN=Psmc6 PE=1 SV=1                     | 17.99486  | 8  | 19 | 8  | 45.507 | 5.52  | 6000000  | 5900000  | 3900000  | 49.74124 |
| Q8BU14 | Translocation protein SEC62 OS=Mus musculus GN=Sec62 PE=1 SV=1                                        | 11.55779  | 6  | 11 | 6  | 45.552 | 7.31  | 1700000  | 2500000  | 1900000  | 29.6551  |
| P62196 | 26S protease regulatory subunit 8 OS=Mus musculus GN=Psmc5 PE=1 SV=1                                  | 25.61576  | 8  | 20 | 8  | 45.597 | 7.55  | 6000000  | 5600000  | 5700000  | 63.33074 |
| Q8VCF1 | Soluble calcium-activated nucleotidase 1 OS=Mus musculus GN=Cant1 PE=2 SV=1                           | 3.970223  | 1  | 1  | 1  | 45.624 | 6.77  |          |          | 570000   | 2.517747 |
| P17047 | Lysosome-associated membrane glycoprotein 2 OS=Mus musculus GN=Lamp2 PE=1 SV=2                        | 12.04819  | 5  | 14 | 5  | 45.652 | 7.39  | 8000000  | 8800000  | 7700000  | 32.61994 |
| Q8VE62 | Polyadenylate-binding protein-interacting protein 1 OS=Mus musculus GN=Paip1 PE=1 SV=1                | 3         | 1  | 1  | 1  | 45.673 | 4.55  |          | 820000   |          | 3.156974 |
| Q91XD7 | Cysteine-rich with EGF-like domain protein 1 OS=Mus musculus GN=Crelid1 PE=1 SV=1                     | 7.619048  | 2  | 4  | 2  | 45.687 | 5.02  | 1500000  | 1100000  | 1400000  | 14.30878 |
| Q9Z2X1 | Heterogeneous nuclear ribonucleoprotein F OS=Mus musculus GN=Hnrnpf PE=1 SV=3                         | 31.08434  | 10 | 29 | 8  | 45.701 | 5.49  | 21000000 | 20000000 | 29000000 | 93.54511 |
| Q8BLF1 | Neutral cholesterol ester hydrolase 1 OS=Mus musculus GN=Nceh1 PE=1 SV=1                              | 2.941176  | 1  | 3  | 1  | 45.711 | 7.05  | 7900000  | 6900000  | 6800000  | 10.25583 |
| Q9QYJ0 | DnaJ homolog subfamily A member 2 OS=Mus musculus GN=Dnaja2 PE=1 SV=1                                 | 29.36893  | 9  | 20 | 9  | 45.717 | 6.48  | 8600000  | 7300000  | 7300000  | 57.74461 |
| Q8BK62 | Olfactomedin-like protein 3 OS=Mus musculus GN=Olfrml3 PE=2 SV=2                                      | 8.128079  | 2  | 4  | 2  | 45.717 | 6.23  | 570000   | 590000   | 570000   | 12.24008 |
| O35984 | Pre-B-cell leukemia transcription factor 2 OS=Mus musculus GN=Pbx2 PE=1 SV=1                          | 3.488372  | 1  | 1  | 1  | 45.781 | 7.56  | 410000   |          |          | 2.772403 |
| Q00898 | Alpha-1-antitrypsin 1-5 OS=Mus musculus GN=Serpina1e PE=1 SV=1                                        | 6.53753   | 2  | 6  | 1  | 45.862 | 5.73  | 820000   | 570000   | 600000   | 17.99116 |
| Q99KU0 | Vacuole membrane protein 1 OS=Mus musculus GN=Vmp1 PE=1 SV=2                                          | 3.940887  | 1  | 1  | 1  | 45.931 | 6.95  |          | 3700000  |          | 2.904893 |
| Q9JIY0 | Pleckstrin homology domain-containing family O member 1 OS=Mus musculus GN=Plekho1 PE=1 SV=1          | 3.186275  | 1  | 2  | 1  | 45.969 | 8.97  |          | 1500000  | 1200000  | 5.274388 |
| P07758 | Alpha-1-antitrypsin 1-1 OS=Mus musculus GN=Serpina1a PE=1 SV=4                                        | 6.53753   | 2  | 6  | 1  | 45.974 | 5.72  | 5400000  | 3700000  | 3200000  | 20.67957 |
| P27659 | 60S ribosomal protein L3 OS=Mus musculus GN=Rpl3 PE=1 SV=3                                            | 28.53598  | 11 | 38 | 11 | 46.081 | 10.21 | 42000000 | 45000000 | 38000000 | 111.3178 |
| P70295 | Ancient ubiquitous protein 1 OS=Mus musculus GN=Aup1 PE=1 SV=1                                        | 2.926829  | 1  | 2  | 1  | 46.092 | 8.4   | 3100000  | 2500000  |          | 6.847631 |
| Q8K0Y2 | Keratin, type I cuticular Ha3-I OS=Mus musculus GN=Krt33a PE=1 SV=1                                   | 49.75248  | 22 | 54 | 5  | 46.107 | 4.83  | 4100000  | 7900000  | 11000000 | 145.5233 |
| P60843 | Eukaryotic initiation factor 4A-I OS=Mus musculus GN=Eif4a1 PE=1 SV=1                                 | 28.81773  | 12 | 55 | 8  | 46.125 | 5.48  | 26000000 | 24000000 | 21000000 | 156.0924 |
| P31324 | cAMP-dependent protein kinase type II-beta regulatory subunit OS=Mus musculus GN=Prkar2b PE=1 SV=3    | 4.807692  | 1  | 3  | 1  | 46.138 | 4.98  | 6000000  | 2800000  | 3200000  | 15.504   |
| Q9CYD3 | Cartilage-associated protein OS=Mus musculus GN=Crtap PE=1 SV=3                                       | 4         | 1  | 1  | 1  | 46.14  | 5.71  |          |          |          | 2.715906 |

|        |                                                                                                                          |           |    |    |    |        |      |          |          |          |        |          |
|--------|--------------------------------------------------------------------------------------------------------------------------|-----------|----|----|----|--------|------|----------|----------|----------|--------|----------|
| Q9QZB7 | Actin-related protein 10 OS=Mus musculus GN=Actr10 PE=1 SV=2                                                             | 7.913669  | 2  | 3  | 2  | 46.178 | 7.61 |          |          | 400000   | 410000 | 8.61925  |
| Q3USH1 | Protein FAM196A OS=Mus musculus GN=Fam196a PE=1 SV=1                                                                     | 4.50237   | 1  | 1  | 1  | 46.193 | 7.14 |          |          |          |        | 2.591757 |
| Q922H4 | Mannose-1-phosphate guanyltransferase alpha OS=Mus musculus GN=Gmppa PE=1 SV=1                                           | 3.333333  | 1  | 1  | 1  | 46.215 | 7.62 |          |          | 900000   |        | 2.271612 |
| P05201 | Aspartate aminotransferase, cytoplasmic OS=Mus musculus GN=Got1 PE=1 SV=3                                                | 8.232446  | 3  | 8  | 3  | 46.219 | 7.14 | 3900000  | 3400000  | 2900000  |        | 21.17346 |
| O88544 | COP9 signalosome complex subunit 4 OS=Mus musculus GN=Cops4 PE=1 SV=1                                                    | 7.142857  | 2  | 6  | 2  | 46.256 | 5.83 | 1800000  | 1700000  | 1500000  |        | 18.2662  |
| Q3UPH1 | Protein PRRC1 OS=Mus musculus GN=Prrc1 PE=1 SV=1                                                                         | 2.934537  | 1  | 1  | 1  | 46.268 | 5.95 | 1900000  |          |          |        | 3.050979 |
| O35368 | Interferon-activable protein 203 OS=Mus musculus GN=Ifi203 PE=1 SV=1                                                     | 13.72549  | 4  | 10 | 3  | 46.27  | 9.35 | 1500000  | 970000   | 630000   |        | 29.73907 |
| Q91YI4 | Beta-arrestin-2 OS=Mus musculus GN=Arrb2 PE=1 SV=1                                                                       | 2.926829  | 1  | 1  | 1  | 46.285 | 7.66 |          |          |          |        | 2.942062 |
| Q8ROA7 | Uncharacterized protein KIAA0513 OS=Mus musculus GN=Kiaa0513 PE=1 SV=1                                                   | 3.194103  | 1  | 2  | 1  | 46.289 | 5.02 | 2400000  | 1400000  |          |        | 6.31752  |
| Q9JH15 | Isovaleryl-CoA dehydrogenase, mitochondrial OS=Mus musculus GN=Ivd PE=1 SV=1                                             | 8.254717  | 3  | 5  | 3  | 46.296 | 8.29 | 2800000  | 2200000  | 2000000  |        | 15.34229 |
| Q9ER73 | Elongator complex protein 4 OS=Mus musculus GN=Elp4 PE=1 SV=2                                                            | 3.554502  | 1  | 1  | 1  | 46.296 | 8.78 |          |          | 510000   |        | 2.116771 |
| Q9CZC8 | Secernin-1 OS=Mus musculus GN=Scrn1 PE=1 SV=1                                                                            | 4.589372  | 1  | 3  | 1  | 46.297 | 4.79 | 2800000  | 1700000  | 2300000  |        | 9.696533 |
| Q640R3 | Hepatocyte cell adhesion molecule OS=Mus musculus GN=Hepacam PE=1 SV=2                                                   | 4.545455  | 1  | 3  | 1  | 46.338 | 9.42 | 2000000  | 990000   |          |        | 7.300106 |
| P10630 | Eukaryotic initiation factor 4A-II OS=Mus musculus GN=Eif4a2 PE=1 SV=2                                                   | 16.70762  | 6  | 28 | 2  | 46.373 | 5.48 | 3000000  | 3300000  | 2600000  |        | 89.01018 |
| Q91W90 | Thioredoxin domain-containing protein 5 OS=Mus musculus GN=Txdnc5 PE=1 SV=2                                              | 20.38369  | 6  | 11 | 6  | 46.386 | 5.78 | 4300000  | 5400000  | 5400000  |        | 32.87334 |
| Q9D7N9 | Adipocyte plasma membrane-associated protein OS=Mus musculus GN=Apmap PE=1 SV=1                                          | 14.6988   | 5  | 12 | 5  | 46.405 | 6.32 | 8300000  | 5900000  | 7200000  |        | 34.46293 |
| Q0VGB7 | Serine/threonine-protein phosphatase 4 regulatory subunit 2 OS=Mus musculus GN=Ppp4r2 PE=1 SV=1                          | 3.117506  | 1  | 2  | 1  | 46.45  | 4.56 |          |          |          |        | 5.273862 |
| P45952 | Medium-chain specific acyl-CoA dehydrogenase, mitochondrial OS=Mus musculus GN=Acadm PE=1 SV=1                           | 8.07601   | 3  | 6  | 3  | 46.452 | 8.37 | 2600000  | 3100000  | 2900000  |        | 16.02146 |
| Q91WL8 | WW domain-containing oxidoreductase OS=Mus musculus GN=Wwox PE=1 SV=1                                                    | 3.381643  | 1  | 1  | 1  | 46.483 | 7.02 | 400000   |          |          |        | 2.19035  |
| Q8R570 | Synaptosomal-associated protein 47 OS=Mus musculus GN=Snap47 PE=1 SV=1                                                   | 12.83293  | 4  | 8  | 4  | 46.495 | 5.76 | 1700000  | 2200000  | 1100000  |        | 22.65805 |
| P19324 | Serpin H1 OS=Mus musculus GN=Serpinh1 PE=1 SV=3                                                                          | 23.98082  | 8  | 30 | 8  | 46.504 | 8.82 | 22000000 | 17000000 | 22000000 |        | 83.71676 |
| Q3U1F9 | Phosphoprotein associated with glycosphingolipid-enriched microdomains 1 OS=Mus musculus GN=Pag1 PE=1 SV=2               | 6.759907  | 1  | 2  | 1  | 46.52  | 4.81 | 1300000  |          |          |        | 6.805506 |
| Q60766 | Irmunity-related GTPase family M protein 1 OS=Mus musculus GN=Irgm1 PE=1 SV=1                                            | 22.24939  | 10 | 25 | 10 | 46.522 | 8.28 | 47000000 | 49000000 | 40000000 |        | 74.43967 |
| Q9ER15 | Bifunctional arginine demethylase and lysyl-hydroxylase JMJD6 OS=Mus musculus GN=Jmjd6 PE=1 SV=2                         | 2.233251  | 1  | 2  | 1  | 46.538 | 8.9  | 850000   |          | 680000   |        | 4.202381 |
| Q8VCS3 | Glycosaminoglycan xylosylkinase OS=Mus musculus GN=Fam20b PE=1 SV=1                                                      | 7.334963  | 2  | 5  | 2  | 46.551 | 6.95 | 2500000  | 1800000  | 1600000  |        | 15.47602 |
| Q7TNC4 | Putative RNA-binding protein Luc7-like 2 OS=Mus musculus GN=Luc7l2 PE=1 SV=1                                             | 24.23469  | 8  | 20 | 5  | 46.555 | 10.1 | 4900000  | 7100000  | 7500000  |        | 59.48552 |
| P16460 | Argininosuccinate synthase OS=Mus musculus GN=Ass1 PE=1 SV=1                                                             | 17.71845  | 9  | 19 | 9  | 46.555 | 8.22 | 14000000 | 13000000 | 13000000 |        | 46.99968 |
| O54941 | SWI/SNF-related matrix-associated actin-dependent regulator of chromatin subfamily E member 1 OS=Mus musculus GN=Smardc5 | 10.7056   | 4  | 6  | 3  | 46.61  | 4.88 | 940000   | 1800000  | 1300000  |        | 15.16876 |
| Q6P8X1 | Sorting nexin-6 OS=Mus musculus GN=Snx6 PE=1 SV=2                                                                        | 20.68966  | 9  | 18 | 8  | 46.62  | 6.16 | 3500000  | 4400000  | 5400000  |        | 40.98576 |
| P63005 | Platelet-activating factor acetylhydrolase IB subunit alpha OS=Mus musculus GN=Pafah1b1 PE=1 SV=2                        | 24.63415  | 8  | 26 | 7  | 46.64  | 7.37 | 13000000 | 11000000 | 10000000 |        | 76.4938  |
| O88844 | Iso citrate dehydrogenase [NADP] cytoplasmic OS=Mus musculus GN=Idh1 PE=1 SV=2                                           | 8.695652  | 3  | 4  | 3  | 46.644 | 7.17 | 1500000  | 1500000  |          |        | 10.17904 |
| Q9WV60 | Glycogen synthase kinase-3 beta OS=Mus musculus GN=Gsk3b PE=1 SV=2                                                       | 13.333333 | 3  | 5  | 2  | 46.681 | 8.78 | 2200000  | 3200000  | 1300000  |        | 10.48802 |
| Q91WP6 | Serine protease inhibitor A3N OS=Mus musculus GN=Serpina3n PE=1 SV=1                                                     | 10.28708  | 3  | 8  | 2  | 46.688 | 5.82 | 1200000  | 1900000  | 1300000  |        | 24.87414 |
| P59017 | Bcl-2-like protein 13 OS=Mus musculus GN=Bcl2l13 PE=1 SV=2                                                               | 5.990783  | 2  | 3  | 2  | 46.691 | 4.59 | 2800000  | 3000000  |          |        | 8.913993 |
| Q9D8U8 | Sorting nexin-5 OS=Mus musculus GN=Snx5 PE=1 SV=1                                                                        | 20.79208  | 8  | 15 | 7  | 46.768 | 6.62 | 9700000  | 7600000  | 4400000  |        | 42.1659  |
| Q91VC3 | Eukaryotic initiation factor 4A-III OS=Mus musculus GN=Eif4a3 PE=1 SV=3                                                  | 18.24818  | 8  | 26 | 8  | 46.81  | 6.73 | 11000000 | 9400000  | 12000000 |        | 75.48108 |
| Q9Z2I8 | Succinate--CoA ligase [GDP-forming] subunit beta, mitochondrial OS=Mus musculus GN=Suclg2 PE=1 SV=3                      | 9.930716  | 3  | 8  | 3  | 46.811 | 7.02 | 2400000  | 2100000  | 1600000  |        | 27.17051 |
| Q9D1Q6 | Endoplasmic reticulum resident protein 44 OS=Mus musculus GN=Erp44 PE=1 SV=1                                             | 25.61576  | 9  | 31 | 8  | 46.823 | 5.27 | 7000000  | 5800000  | 6300000  |        | 97.36986 |
| P07759 | Serine protease inhibitor A3K OS=Mus musculus GN=Serpina3k PE=1 SV=2                                                     | 11.24402  | 4  | 10 | 3  | 46.85  | 5.16 | 920000   | 2000000  | 2700000  |        | 28.63136 |
| Q8BV49 | Pyrin and HIN domain-containing protein 1 OS=Mus musculus GN=Pyhin1 PE=1 SV=1                                            | 20.2381   | 7  | 19 | 7  | 46.857 | 9.45 | 7200000  | 7000000  | 6000000  |        | 58.12559 |
| Q8BWL5 | RNA-binding motif, single-stranded-interacting protein 3 OS=Mus musculus GN=Rbms3 PE=2 SV=2                              | 3.480278  | 1  | 1  | 1  | 46.897 | 7.99 |          | 2200000  |          |        | 2.98375  |
| Q3TCJ1 | BRISC complex subunit Abro1 OS=Mus musculus GN=Fam175b PE=1 SV=1                                                         | 3.13253   | 1  | 3  | 1  | 46.914 | 6.18 | 1700000  | 2000000  | 270000   |        | 5.853742 |
| Q9ESW4 | Acylglycerol kinase, mitochondrial OS=Mus musculus GN=Agk PE=1 SV=1                                                      | 8.551069  | 3  | 6  | 3  | 46.946 | 8.4  | 1600000  | 1500000  | 1600000  |        | 14.9464  |
| P21183 | Interleukin-5 receptor subunit alpha OS=Mus musculus GN=Il5ra PE=2 SV=1                                                  | 3.13253   | 1  | 2  | 1  | 46.959 | 7.84 |          |          |          |        | 4.86632  |
| P30275 | Creatine kinase U-type, mitochondrial OS=Mus musculus GN=Ckmt1 PE=1 SV=1                                                 | 12.67943  | 4  | 11 | 4  | 46.974 | 8.16 | 5600000  | 3200000  | 3400000  |        | 36.00767 |
| Q9DCL9 | Multifunctional protein ADE2 OS=Mus musculus GN=Paics PE=1 SV=4                                                          | 27.05882  | 10 | 36 | 10 | 46.976 | 7.23 | 16000000 | 18000000 | 12000000 |        | 111.4568 |
| Q8B5E0 | Regulator of microtubule dynamics protein 2 OS=Mus musculus GN=Rmdn2 PE=1 SV=1                                           | 6.585366  | 2  | 5  | 2  | 46.986 | 7.56 | 980000   | 970000   | 840000   |        | 12.1047  |
| Q60634 | Flotillin-2 OS=Mus musculus GN=Flot2 PE=1 SV=2                                                                           | 5.841121  | 2  | 4  | 2  | 47.009 | 5.2  | 1900000  | 2300000  | 1700000  |        | 11.602   |
| Q61765 | Keratin, type I cuticular Ha1 OS=Mus musculus GN=Krt31 PE=1 SV=2                                                         | 43.50962  | 20 | 55 | 2  | 47.087 | 4.89 | 1100000  | 2100000  | 1900000  |        | 144.3936 |
| Q62443 | Neuronal pentraxin-1 OS=Mus musculus GN=Nptx1 PE=1 SV=1                                                                  | 9.490741  | 2  | 5  | 2  | 47.088 | 6.44 | 1900000  | 810000   | 1100000  |        | 13.35677 |
| P16330 | 2',3'-cyclic-nucleotide 3'-phosphodiesterase OS=Mus musculus GN=Cnp PE=1 SV=3                                            | 36.66667  | 17 | 54 | 17 | 47.094 | 8.97 | 60000000 | 37000000 | 35000000 |        | 171.9367 |
| P17182 | Alpha-enolase OS=Mus musculus GN=Eno1 PE=1 SV=3                                                                          | 23.04147  | 9  | 30 | 8  | 47.111 | 6.8  | 15000000 | 12000000 | 11000000 |        | 84.80939 |
| Q9D8E6 | 60S ribosomal protein L4 OS=Mus musculus GN=Rpl4 PE=1 SV=3                                                               | 27.20764  | 13 | 50 | 13 | 47.124 | 11   | 60000000 | 49000000 | 64000000 |        | 144.7724 |

|        |                                                                                                                  |          |          |     |    |        |        |          |          |          |          |
|--------|------------------------------------------------------------------------------------------------------------------|----------|----------|-----|----|--------|--------|----------|----------|----------|----------|
| Q4VBE8 | WD repeat-containing protein 18 OS=Mus musculus GN=Wdr18 PE=1 SV=1                                               | 7.424594 | 3        | 6   | 3  | 47.181 | 6.89   | 1600000  | 1100000  | 990000   | 16.3474  |
| Q64345 | Interferon-induced protein with tetratricopeptide repeats 3 OS=Mus musculus GN=Ifit3 PE=1 SV=1                   | 40.44665 | 14       | 38  | 14 | 47.192 | 5.64   | 15000000 | 14000000 | 9900000  | 124.0909 |
| Q9D0F4 | NF-kappa-B-activating protein OS=Mus musculus GN=Nkap PE=2 SV=1                                                  | 3.373494 | 1        | 1   | 1  | 47.199 | 10.13  |          |          | 2000000  | 2.453612 |
| Q9DBG5 | Perilipin-3 OS=Mus musculus GN=Plin3 PE=1 SV=1                                                                   | 5.034325 | 2        | 2   | 2  | 47.233 | 5.62   | 1400000  | 1800000  |          | 4.95992  |
| P17183 | Gamma-enolase OS=Mus musculus GN=Eno2 PE=1 SV=2                                                                  | 8.525346 | 3        | 9   | 2  | 47.267 | 5.11   | 1900000  | 2200000  | 2000000  | 24.10876 |
| Q80X14 | Phosphatidylinositol 5-phosphate 4-kinase type-2 beta OS=Mus musculus GN=Pip4k2b PE=1 SV=1                       | 7.932692 | 3        | 9   | 3  | 47.289 | 7.33   | 4100000  | 3000000  | 2900000  | 26.93236 |
| P06336 | Ig epsilon chain C region OS=Mus musculus PE=4 SV=2                                                              | 7.125891 | 2        | 5   | 2  | 47.291 | 7.44   | 470000   | 1000000  | 1000000  | 12.67805 |
| Q9JMK2 | Casein kinase I isoform epsilon OS=Mus musculus GN=Csnk1e PE=1 SV=2                                              | 2.644231 | 1        | 1   | 1  | 47.292 | 9.66   |          |          | 1300000  | 0        |
| Q8BP71 | RNA binding protein fox-1 homolog 2 OS=Mus musculus GN=Rbfox2 PE=1 SV=2                                          | 4.899777 | 1        | 2   | 1  | 47.301 | 6.55   | 1100000  |          |          | 6.75958  |
| Q99JY9 | Actin-related protein 3 OS=Mus musculus GN=Actr3 PE=1 SV=3                                                       | 31.81818 | 10       | 37  | 10 | 47.327 | 5.88   | 33000000 | 30000000 | 27000000 | 115.6654 |
| Q06180 | Tyrosine-protein phosphatase non-receptor type 2 OS=Mus musculus GN=Ptpn2 PE=1 SV=2                              | 11.08374 | 3        | 5   | 3  | 47.33  | 8.37   | 2900000  | 1700000  | 2500000  | 15.86023 |
| Q91ZN5 | Adenosine 3'-phospho 5'-phosphosulfate transporter 1 OS=Mus musculus GN=Slc35b2 PE=1 SV=1                        | 2.320186 | 1        | 2   | 1  | 47.339 | 9.29   |          | 2500000  | 3600000  | 5.815048 |
| Q9ERS5 | Pleckstrin homology domain-containing family A member 2 OS=Mus musculus GN=Plekha2 PE=1 SV=1                     | 2.588235 | 1        | 1   | 1  | 47.35  | 8.47   | 490000   |          |          | 2.741481 |
| Q9DBE8 | Alpha-1,3/1,6-mannosyltransferase ALG2 OS=Mus musculus GN=Alg2 PE=1 SV=2                                         | 6.024096 | 2        | 4   | 2  | 47.374 | 7.97   | 510000   | 2000000  | 3100000  | 10.51969 |
| P54775 | 26S protease regulatory subunit 6B OS=Mus musculus GN=Psmc4 PE=1 SV=2                                            | 19.37799 | 8        | 14  | 8  | 47.379 | 5.21   | 4000000  | 2600000  | 3800000  | 36.86314 |
| P05202 | Aspartate aminotransferase, mitochondrial OS=Mus musculus GN=Got2 PE=1 SV=1                                      | 21.62791 | 10       | 30  | 10 | 47.381 | 9      | 29000000 | 23000000 | 27000000 | 87.21028 |
| P46096 | Synaptotagmin-1 OS=Mus musculus GN=Syt1 PE=1 SV=1                                                                | 26.60333 | 10       | 24  | 10 | 47.388 | 8.53   | 20000000 | 9500000  | 6900000  | 64.3194  |
| Q8BG32 | 26S proteasome non-ATPase regulatory subunit 11 OS=Mus musculus GN=Psm11 PE=1 SV=3                               | 21.09005 | 9        | 18  | 9  | 47.407 | 6.48   | 5800000  | 5800000  | 3900000  | 56.96076 |
| Q922N8 | Actin-like protein 6A OS=Mus musculus GN=Actl6a PE=1 SV=2                                                        | 9.324009 | 3        | 5   | 3  | 47.417 | 5.6    | 1200000  |          | 980000   | 15.19721 |
| Q7TQ95 | Protein lunapark OS=Mus musculus GN=Lnp PE=1 SV=1                                                                | 16.94118 | 5        | 11  | 5  | 47.47  | 5.27   | 2400000  | 1900000  | 1600000  | 30.13588 |
| O08917 | Flotillin-1 OS=Mus musculus GN=Flot1 PE=1 SV=1                                                                   | 6.074766 | 2        | 4   | 2  | 47.484 | 7.15   | 1000000  | 1400000  | 1800000  | 11.32304 |
| Q9CPV7 | Palmitoyltransferase ZDHHC6 OS=Mus musculus GN=Zdhhc6 PE=2 SV=1                                                  | 2.905569 | 1        | 1   | 1  | 47.496 | 8.54   | 1100000  |          |          | 2.518075 |
| Q8BLQ9 | Cell adhesion molecule 2 OS=Mus musculus GN=Cadm2 PE=1 SV=2                                                      | 10.34483 | 3        | 10  | 3  | 47.529 | 5.41   | 5300000  | 2800000  | 3000000  | 40.33079 |
| Q9QZ85 | Interferon-inducible GTPase 1 OS=Mus musculus GN=Ilgp1 PE=1 SV=2                                                 | 51.81598 | 17       | 64  | 17 | 47.542 | 6.33   | 37000000 | 37000000 | 29000000 | 218.0612 |
| P97814 | Proline-serine-threonine phosphatase-interacting protein 1 OS=Mus musculus GN=Pstpip1 PE=1 SV=1                  | 2.168675 | 1        | 3   | 1  | 47.561 | 5.53   | 1000000  | 970000   | 670000   | 7.014765 |
| Q60972 | Histone-binding protein RBBP4 OS=Mus musculus GN=Rbbp4 PE=1 SV=5                                                 | 26.82353 | 9        | 28  | 5  | 47.626 | 4.89   | 15000000 | 9400000  | 14000000 | 90.79294 |
| P50247 | Adenosylhomocysteinase OS=Mus musculus GN=Ahcyl PE=1 SV=3                                                        | 14.12037 | 5        | 13  | 4  | 47.657 | 6.54   | 3300000  | 4200000  | 3800000  | 34.5557  |
| O88712 | C-terminal-binding protein 1 OS=Mus musculus GN=Ctbp1 PE=1 SV=2                                                  | 15.19274 | 6        | 11  | 5  | 47.715 | 6.77   | 2900000  | 3000000  | 3000000  | 27.91358 |
| P32067 | Lupus La protein homolog OS=Mus musculus GN=Ssb PE=1 SV=1                                                        | 24.09639 | 10       | 29  | 10 | 47.727 | 9.77   | 21000000 | 20000000 | 19000000 | 93.30378 |
| Q8BK72 | 28S ribosomal protein S27, mitochondrial OS=Mus musculus GN=Mrps27 PE=1 SV=2                                     | 9.156627 | 3        | 6   | 3  | 47.748 | 5.5    | 1500000  | 1700000  | 1100000  | 16.34455 |
| Q60973 | Histone-binding protein RBBP7 OS=Mus musculus GN=Rbbp7 PE=1 SV=1                                                 | 28.23529 | 9        | 26  | 5  | 47.76  | 5.05   | 7100000  | 8300000  | 6900000  | 83.13981 |
| O88543 | COP9 signalosome complex subunit 3 OS=Mus musculus GN=Cops3 PE=1 SV=3                                            | 3.546099 | 1        | 3   | 1  | 47.801 | 6.65   | 1200000  | 1600000  |          | 9.526465 |
| O08736 | Caspase-12 OS=Mus musculus GN=Casp12 PE=1 SV=1                                                                   | 2.625298 | 1        | 1   | 1  | 47.823 | 6.37   |          |          | 850000   | 2.208715 |
| P51174 | Long-chain specific acyl-CoA dehydrogenase, mitochondrial OS=Mus musculus GN=Acadl PE=1 SV=2                     | 22.09302 | 7        | 22  | 7  | 47.877 | 8.31   | 8700000  | 7400000  | 8500000  | 77.94835 |
| Q922H2 | [Pyruvate dehydrogenase (acetyl-transferring)] kinase isozyme 3, mitochondrial OS=Mus musculus GN=Pdk3 PE=1 SV=1 | 5.542169 | 2        | 7   | 2  | 47.893 | 8.82   | 1700000  | 1600000  | 1500000  | 17.85952 |
| O55040 | Neuremodin-U receptor 1 OS=Mus musculus GN=Nmur1 PE=2 SV=2                                                       | 3.738318 | 1        | 1   | 1  | 47.903 | 8.72   |          | 57000000 |          | 1.870761 |
| Q99KH8 | Serine/threonine-protein kinase 24 OS=Mus musculus GN=Stk24 PE=1 SV=1                                            | 12.06497 | 4        | 8   | 4  | 47.924 | 5.43   | 2900000  | 2500000  | 2400000  | 25.59879 |
| O88522 | NF-kappa-B essential modulator OS=Mus musculus GN=Ikkg PE=1 SV=2                                                 | 1.941748 | 1        | 1   | 1  | 47.942 | 5.85   |          |          |          | 2.086301 |
| P47226 | Testin OS=Mus musculus GN=Tes PE=1 SV=1                                                                          | 2.600473 | 1        | 1   | 1  | 47.951 | 8.31   |          | 680000   |          | 3.102876 |
| Q8VD58 | Protein EVI2B OS=Mus musculus GN=Evi2b PE=1 SV=1                                                                 | 3.828829 | 1        | 2   | 1  | 47.964 | 4.61   | 430000   |          | 400000   | 6.005379 |
| P14211 | Calreticulin OS=Mus musculus GN=Calr PE=1 SV=1                                                                   | 56.73077 | 23       | 126 | 23 | 47.965 | 4.49   | 1.1E+08  | 1.1E+08  | 1.1E+08  | 433.725  |
| Q9CQC6 | Basic leucine zipper and W2 domain-containing protein 1 OS=Mus musculus GN=Bzw1 PE=1 SV=1                        | 16.46778 | 9        | 22  | 6  | 48.013 | 5.92   | 14000000 | 8400000  | 13000000 | 53.69767 |
| Q99KK2 | N-acetylneuraminatase cytidyltransferase OS=Mus musculus GN=Cmas PE=1 SV=2                                       | 14.81481 | 5        | 14  | 5  | 48.028 | 8.1    | 3800000  | 5100000  | 5000000  | 42.68156 |
| Q91VK1 | Basic leucine zipper and W2 domain-containing protein 2 OS=Mus musculus GN=Bzw2 PE=1 SV=1                        | 5.966587 | 4        | 11  | 1  | 48.033 | 6.68   | 2700000  | 3400000  | 3200000  | 30.45337 |
| Q922R8 | Protein disulfide-isomerase A6 OS=Mus musculus GN=Pdia6 PE=1 SV=3                                                | 29.31818 | 9        | 31  | 9  | 48.07  | 5.14   | 62000000 | 59000000 | 51000000 | 101.0461 |
| Q04695 | SWISS-PROT:Q04695 Tax_Id=9606 Gene_Symbol=KRT17 Keratin, type I cytoskeletal 17                                  | x        | 45.83333 | 20  | 41 | 3      | 48.076 | 5.02     |          | 8300000  | 110.2948 |
| Q9C075 | SWISS-PROT:Q9C075 Tax_Id=9606 Gene_Symbol=KRT23 Keratin, type I cytoskeletal 23                                  | x        | 6.635071 | 2   | 2  | 1      | 48.101 | 6.54     |          | 1900000  | 4.214563 |
| Q9QWL7 | SWISS-PROT:Q9QWL7 Tax_Id=10090 Gene_Symbol=Krt17 Keratin, type I cytoskeletal 17                                 | x        | 40.8776  | 18  | 42 | 1      | 48.132 | 5.06     |          | 1800000  | 110.8862 |
| Q64337 | Sequestosome-1 OS=Mus musculus GN=Sqstm1 PE=1 SV=1                                                               | 26.24434 | 6        | 13  | 6  | 48.132 | 5.21   | 3700000  | 3000000  | 1700000  | 46.44239 |
| Q9D6K9 | Ceramide synthase 5 OS=Mus musculus GN=Cers5 PE=1 SV=1                                                           | 1.690821 | 1        | 1   | 1  | 48.135 | 8.07   |          |          | 1000000  | 2.225555 |
| Q60780 | Growth arrest-specific protein 7 OS=Mus musculus GN=Gas7 PE=1 SV=1                                               | 7.83848  | 3        | 7   | 3  | 48.143 | 7.83   | 3100000  | 1700000  | 1900000  | 16.36012 |
| Q8BGA9 | Mitochondrial inner membrane protein OXA1L OS=Mus musculus GN=Oxa1l PE=1 SV=1                                    | 2.309469 | 1        | 2   | 1  | 48.189 | 9.61   |          | 1200000  | 1400000  | 5.36963  |
| Q9DB77 | Cytochrome b-c1 complex subunit 2, mitochondrial OS=Mus musculus GN=Uqcrc2 PE=1 SV=1                             | 31.34658 | 11       | 35  | 11 | 48.205 | 9.25   | 16000000 | 15000000 | 12000000 | 113.6243 |



|        |                                                                                                                  |           |    |     |    |        |       |          |          |          |          |
|--------|------------------------------------------------------------------------------------------------------------------|-----------|----|-----|----|--------|-------|----------|----------|----------|----------|
| Q9D964 | Glycine amidinotransferase, mitochondrial OS=Mus musculus GN=Gatm PE=1 SV=1                                      | 8.510638  | 3  | 4   | 3  | 48.266 | 7.88  | 1800000  | 1800000  | 1100000  | 11.92948 |
| Q3TIV5 | Zinc finger CCCH domain-containing protein 15 OS=Mus musculus GN=Zc3h15 PE=1 SV=2                                | 10.32864  | 5  | 10  | 5  | 48.297 | 5.3   | 3000000  | 2200000  | 2200000  | 28.72417 |
| Q921S7 | 39S ribosomal protein L37, mitochondrial OS=Mus musculus GN=Mrpl37 PE=1 SV=1                                     | 4.255319  | 1  | 1   | 1  | 48.31  | 8.84  |          |          | 1100000  | 2.948414 |
| P29758 | Ornithine aminotransferase, mitochondrial OS=Mus musculus GN=Oat PE=1 SV=1                                       | 11.38952  | 3  | 6   | 3  | 48.324 | 6.62  | 5300000  | 2400000  | 2400000  | 19.86758 |
| Q60749 | KH domain-containing, RNA-binding, signal transduction-associated protein 1 OS=Mus musculus GN=Khdrbs1 PE=1 SV=2 | 5.191874  | 3  | 16  | 2  | 48.34  | 8.72  | 13000000 | 13000000 | 10000000 | 48.87837 |
| Q99LC2 | Cleavage stimulation factor subunit 1 OS=Mus musculus GN=Cstf1 PE=1 SV=1                                         | 7.888631  | 2  | 6   | 2  | 48.351 | 6.58  | 1500000  | 1200000  | 16000000 | 22.12265 |
| P35585 | AP-1 complex subunit mu-1 OS=Mus musculus GN=Ap1m1 PE=1 SV=3                                                     | 12.52955  | 4  | 10  | 4  | 48.512 | 7.3   | 3700000  | 3200000  | 3200000  | 27.13226 |
| Q99J88 | Protein kinase C and casein kinase II substrate protein 3 OS=Mus musculus GN=Pacsin3 PE=1 SV=1                   | 3.773585  | 1  | 2   | 1  | 48.555 | 6.1   | 250000   | 670000   |          | 4.143542 |
| Q60759 | Glutaryl-CoA dehydrogenase, mitochondrial OS=Mus musculus GN=Gcdh PE=1 SV=2                                      | 6.392694  | 2  | 3   | 2  | 48.575 | 8.73  |          | 770000   | 1100000  | 8.769929 |
| P46471 | 26S protease regulatory subunit 7 OS=Mus musculus GN=Psmc2 PE=1 SV=5                                             | 25.886605 | 10 | 23  | 10 | 48.617 | 5.95  | 10000000 | 9400000  | 8600000  | 65.0839  |
| Q62418 | Drebrin-like protein OS=Mus musculus GN=Dbrn1 PE=1 SV=2                                                          | 27.75229  | 8  | 28  | 8  | 48.67  | 4.92  | 7500000  | 7400000  | 6000000  | 94.3293  |
| Q8VD31 | Tapasin-related protein OS=Mus musculus GN=Tapbp1 PE=1 SV=2                                                      | 4.21286   | 2  | 4   | 2  | 48.702 | 6.46  | 8400000  | 4800000  | 5600000  | 9.443196 |
| Q9CZ91 | Serum response factor-binding protein 1 OS=Mus musculus GN=Srfbp1 PE=1 SV=1                                      | 4.761905  | 1  | 5   | 1  | 48.716 | 9.54  | 2100000  | 700000   | 1200000  | 17.50549 |
| Q9DBF7 | Pre-mRNA-splicing factor CWC25 homolog OS=Mus musculus GN=Cwc25 PE=2 SV=2                                        | 2.884615  | 1  | 1   | 1  | 48.782 | 10.23 |          |          | 300000   | 1.910066 |
| Q9JHI7 | Exosome complex component RRP45 OS=Mus musculus GN=Exoc9 PE=1 SV=1                                               | 5.479452  | 2  | 5   | 2  | 48.906 | 5.11  | 1100000  | 1500000  | 1100000  | 13.91919 |
| P56546 | C-terminal-binding protein 2 OS=Mus musculus GN=Ctbp2 PE=1 SV=2                                                  | 4.269663  | 2  | 2   | 1  | 48.926 | 6.95  | 1500000  |          |          | 4.659512 |
| P59325 | Eukaryotic translation initiation factor 5 OS=Mus musculus GN=Eif5 PE=1 SV=1                                     | 11.42191  | 4  | 8   | 4  | 48.938 | 5.52  | 4200000  | 3000000  | 3800000  | 21.56996 |
| Q9D2G2 | Dihydropyridylsuccinyltransferase component of 2-oxoglutarate dehydrogenase complex, mitochondrial OS=Mus mu     | 7.048458  | 3  | 7   | 3  | 48.963 | 8.95  | 4100000  | 2300000  | 4100000  | 19.27876 |
| O54734 | Dolichyl-diphosphooligosaccharide--protein glycosyltransferase 48 kDa subunit OS=Mus musculus GN=Ddst PE=1 SV=2  | 12.01814  | 5  | 13  | 5  | 48.997 | 5.83  | 18000000 | 15000000 | 18000000 | 35.10423 |
| Q8BWW3 | Eukaryotic peptide chain release factor subunit 1 OS=Mus musculus GN=Etf1 PE=1 SV=4                              | 12.12815  | 5  | 15  | 5  | 49     | 5.71  | 6500000  | 7300000  | 6700000  | 41.81423 |
| Q9Z1N5 | Spliceosome RNA helicase Ddx39b OS=Mus musculus GN=Ddx39b PE=1 SV=1                                              | 22.8972   | 9  | 31  | 4  | 49.004 | 5.67  | 5900000  | 8000000  | 9500000  | 85.89221 |
| Q8VDW0 | ATP-dependent RNA helicase DDX39A OS=Mus musculus GN=Ddx39a PE=1 SV=1                                            | 17.79859  | 8  | 19  | 3  | 49.036 | 5.68  | 6600000  | 6900000  | 8600000  | 51.13371 |
| P62192 | 26S protease regulatory subunit 4 OS=Mus musculus GN=Psmc1 PE=1 SV=1                                             | 22.04545  | 7  | 21  | 7  | 49.154 | 6.21  | 4200000  | 4100000  | 2800000  | 66.48805 |
| O35737 | Heterogeneous nuclear ribonucleoprotein H OS=Mus musculus GN=HnRNPH1 PE=1 SV=3                                   | 32.07127  | 10 | 38  | 4  | 49.168 | 6.3   | 17000000 | 15000000 | 21000000 | 124.6744 |
| Q810D6 | Glutamate-rich WD repeat-containing protein 1 OS=Mus musculus GN=Grwd1 PE=1 SV=2                                 | 11.88341  | 3  | 4   | 3  | 49.193 | 4.81  | 1300000  | 1100000  |          | 11.96214 |
| Q8BY71 | Histone acetyltransferase type B catalytic subunit OS=Mus musculus GN=Hat1 PE=1 SV=1                             | 3.846154  | 1  | 5   | 1  | 49.247 | 6.33  | 1300000  | 1100000  | 800000   | 16.22449 |
| P70333 | Heterogeneous nuclear ribonucleoprotein H2 OS=Mus musculus GN=HnRNPH2 PE=1 SV=1                                  | 22.049    | 7  | 30  | 2  | 49.248 | 6.3   | 5000000  | 3700000  | 5100000  | 102.3349 |
| Q63912 | Oligodendrocyte-myelin glycoprotein OS=Mus musculus GN=Omg PE=1 SV=1                                             | 4.545455  | 2  | 3   | 2  | 49.252 | 8.41  | 9000000  | 5700000  |          | 8.133835 |
| P20664 | DNA primase small subunit OS=Mus musculus GN=Prim1 PE=1 SV=1                                                     | 2.63789   | 1  | 1   | 1  | 49.264 | 8.6   |          | 630000   |          | 2.39085  |
| Q9JIY5 | Serine protease HTRA2, mitochondrial OS=Mus musculus GN=Htra2 PE=1 SV=2                                          | 2.620087  | 1  | 2   | 1  | 49.318 | 9.6   | 1300000  | 1100000  |          | 5.41678  |
| Q9D2V8 | Major facilitator superfamily domain-containing protein 10 OS=Mus musculus GN=Mfsd10 PE=1 SV=1                   | 5.701754  | 2  | 5   | 2  | 49.337 | 9.95  | 4200000  | 3500000  | 6900000  | 12.85612 |
| O89017 | Legumain OS=Mus musculus GN=Lgmn PE=1 SV=1                                                                       | 6.666667  | 2  | 3   | 2  | 49.341 | 6.39  |          | 800000   | 1400000  | 7.756741 |
| P62484 | Abl interactor 2 OS=Mus musculus GN=Abi2 PE=1 SV=1                                                               | 7.847534  | 3  | 6   | 2  | 49.356 | 6.01  | 1800000  | 820000   | 720000   | 15.96784 |
| Q8VCM7 | Fibrinogen gamma chain OS=Mus musculus GN=Fgg PE=1 SV=1                                                          | 50        | 16 | 37  | 16 | 49.36  | 5.86  | 14000000 | 17000000 | 15000000 | 107.283  |
| P46467 | Vacuolar protein sorting-associated protein 4B OS=Mus musculus GN=Vps4b PE=1 SV=2                                | 1.801802  | 1  | 2   | 1  | 49.389 | 7.11  | 830000   |          | 1100000  | 4.533396 |
| Q9WVJ9 | EGF-containing fibulin-like extracellular matrix protein 2 OS=Mus musculus GN=Efemp2 PE=1 SV=1                   | 12.18962  | 4  | 8   | 4  | 49.392 | 4.89  | 1400000  | 1700000  | 2000000  | 22.66582 |
| Q9JIH2 | Nuclear pore complex protein Nup50 OS=Mus musculus GN=Nup50 PE=1 SV=3                                            | 5.364807  | 1  | 1   | 1  | 49.455 | 6.24  |          |          |          | 2.675808 |
| Q8BFR5 | Elongation factor Tu, mitochondrial OS=Mus musculus GN=Tufm PE=1 SV=1                                            | 13.0531   | 5  | 13  | 5  | 49.477 | 7.56  | 6500000  | 4200000  | 4900000  | 35.16869 |
| O88685 | 26S protease regulatory subunit 6A OS=Mus musculus GN=Psmc3 PE=1 SV=2                                            | 26.92308  | 8  | 26  | 8  | 49.518 | 5.19  | 9400000  | 8300000  | 7000000  | 79.62004 |
| Q9R099 | Transducin beta-like protein 2 OS=Mus musculus GN=Tbl2 PE=1 SV=2                                                 | 9.276018  | 4  | 6   | 4  | 49.552 | 9.04  | 2100000  | 1900000  | 2300000  | 14.55165 |
| Q9D6F9 | Tubulin beta-4A chain OS=Mus musculus GN=Tubb4a PE=1 SV=3                                                        | 41.21622  | 15 | 133 | 2  | 49.554 | 4.88  | 29000000 | 21000000 | 13000000 | 396.9235 |
| P35821 | Tyrosine-protein phosphatase non-receptor type 1 OS=Mus musculus GN=Ptpn1 PE=1 SV=2                              | 23.14815  | 7  | 16  | 7  | 49.561 | 6.16  | 6500000  | 4400000  | 3200000  | 42.49456 |
| Q9D0D5 | General transcription factor IIE subunit 1 OS=Mus musculus GN=Gtf2e1 PE=1 SV=1                                   | 2.727273  | 1  | 3   | 1  | 49.562 | 4.86  | 2200000  | 2200000  | 1900000  | 7.707129 |
| Q9EST1 | Gasdermin-A OS=Mus musculus GN=Gsdma PE=2 SV=1                                                                   | 2.017937  | 1  | 1   | 1  | 49.562 | 5.57  |          |          | 2400000  | 1.80865  |
| Q91ZE0 | Trimethyllysine dioxygenase, mitochondrial OS=Mus musculus GN=Tmlhe PE=1 SV=2                                    | 2.375297  | 1  | 1   | 1  | 49.578 | 8.25  |          | 1700000  |          | 1.984209 |
| Q9R1T4 | Septin-6 OS=Mus musculus GN=Sept6 PE=1 SV=4                                                                      | 23.73272  | 8  | 22  | 3  | 49.588 | 6.43  | 7100000  | 4800000  | 3700000  | 64.61614 |
| P84091 | AP-2 complex subunit mu OS=Mus musculus GN=Ap2m1 PE=1 SV=1                                                       | 16.32184  | 7  | 13  | 7  | 49.623 | 9.54  | 6600000  | 4200000  | 4000000  | 37.98065 |
| P99024 | Tubulin beta-5 chain OS=Mus musculus GN=Tubb5 PE=1 SV=1                                                          | 50        | 19 | 160 | 3  | 49.639 | 4.89  | 75000000 | 32000000 | 32000000 | 494.1948 |
| Q8C1B7 | Septin-11 OS=Mus musculus GN=Sept11 PE=1 SV=4                                                                    | 34.57077  | 13 | 35  | 6  | 49.663 | 6.68  | 20000000 | 15000000 | 14000000 | 98.23488 |
| P36552 | Oxygen-dependent coproporphyrinogen-III oxidase, mitochondrial OS=Mus musculus GN=Cpox PE=1 SV=2                 | 3.386005  | 1  | 2   | 1  | 49.683 | 8.53  | 1100000  | 750000   |          | 6.629893 |
| Q9R233 | Tapasin OS=Mus musculus GN=Tapbp PE=1 SV=2                                                                       | 18.70968  | 8  | 28  | 8  | 49.705 | 8.5   | 31000000 | 25000000 | 25000000 | 81.9357  |
| Q80X41 | Serine/threonine-protein kinase VRK1 OS=Mus musculus GN=Vrk1 PE=1 SV=2                                           | 12.95455  | 3  | 6   | 3  | 49.709 | 8.94  | 3000000  | 3000000  | 780000   | 18.05919 |
| O54825 | Bystin OS=Mus musculus GN=Bysl PE=1 SV=3                                                                         | 3.440367  | 1  | 3   | 1  | 49.752 | 7.78  | 2900000  | 3200000  | 2800000  | 9.778944 |

|          |                                                                                                        |          |    |     |    |        |      |          |          |          |          |
|----------|--------------------------------------------------------------------------------------------------------|----------|----|-----|----|--------|------|----------|----------|----------|----------|
| Q8R5M8   | Cell adhesion molecule 1 OS=Mus musculus GN=Cadm1 PE=1 SV=2                                            | 8.333333 | 2  | 9   | 2  | 49.757 | 5.03 | 7100000  | 4900000  | 5200000  | 37.1313  |
| Q99PL6   | UBX domain-containing protein 6 OS=Mus musculus GN=Ubxn6 PE=1 SV=1                                     | 5.429864 | 1  | 3   | 1  | 49.765 | 8.54 | 1000000  | 220000   | 590000   | 8.326593 |
| Q8K358   | Phosphatidylinositol glycan anchor biosynthesis class U protein OS=Mus musculus GN=Pigu PE=1 SV=4      | 2.304147 | 1  | 1   | 1  | 49.772 | 7.72 | 1300000  |          |          | 2.576029 |
| Q8CHH9   | Septin-8 OS=Mus musculus GN=Sept8 PE=1 SV=4                                                            | 14.91841 | 6  | 14  | 2  | 49.781 | 6    | 8800000  | 2200000  | 4200000  | 36.39564 |
| Q91VI7   | Ribonuclease inhibitor OS=Mus musculus GN=Rnh1 PE=1 SV=1                                               | 5.263158 | 2  | 4   | 2  | 49.784 | 4.78 | 2300000  | 1800000  | 2200000  | 11.94204 |
| P68372   | Tubulin beta-4B chain OS=Mus musculus GN=Tubb4b PE=1 SV=1                                              | 52.80899 | 19 | 153 | 1  | 49.799 | 4.89 | 80000000 | 44000000 | 47000000 | 471.5279 |
| P03995   | Glial fibrillary acidic protein OS=Mus musculus GN=Gfap PE=1 SV=4                                      | 59.30233 | 35 | 133 | 31 | 49.87  | 5.34 | 1.8E+08  | 1.1E+08  | 1.1E+08  | 386.7526 |
| Q7TMM9   | Tubulin beta-2A chain OS=Mus musculus GN=Tubb2a PE=1 SV=1                                              | 53.70787 | 21 | 163 | 1  | 49.875 | 4.89 | 80000000 | 42000000 | 49000000 | 501.6692 |
| P68373   | Tubulin alpha-1C chain OS=Mus musculus GN=Tuba1c PE=1 SV=1                                             | 48.77506 | 17 | 78  | 1  | 49.877 | 5.1  | 16000000 | 15000000 |          | 233.7272 |
| Q62203   | Splicing factor 3A subunit 2 OS=Mus musculus GN=Sf3a2 PE=1 SV=2                                        | 2.315789 | 1  | 2   | 1  | 49.888 | 9.54 | 5400000  |          | 4000000  | 6.23041  |
| P68368   | Tubulin alpha-4A chain OS=Mus musculus GN=Tuba4a PE=1 SV=1                                             | 49.10714 | 16 | 64  | 5  | 49.892 | 5.06 | 37000000 | 18000000 | 21000000 | 198.1749 |
| Q07076   | Annexin A7 OS=Mus musculus GN=Anxa7 PE=1 SV=2                                                          | 10.79914 | 4  | 14  | 4  | 49.893 | 6.18 | 3900000  | 2700000  | 2900000  | 36.08479 |
| P19182   | Interferon-related developmental regulator 1 OS=Mus musculus GN=Ifrd1 PE=1 SV=2                        | 6.904232 | 2  | 2   | 2  | 49.903 | 7.18 |          | 300000   | 970000   | 6.118073 |
| Q04888   | Transcription factor SOX-10 OS=Mus musculus GN=Sox10 PE=2 SV=2                                         | 5.579399 | 1  | 4   | 1  | 49.918 | 6.6  | 5200000  | 5300000  | 4000000  | 20.92147 |
| Q9CWF2   | Tubulin beta-2B chain OS=Mus musculus GN=Tubb2b PE=1 SV=1                                              | 53.70787 | 21 | 164 | 1  | 49.921 | 4.89 | 36000000 | 30000000 | 27000000 | 503.302  |
| P01872   | Ig mu chain C region OS=Mus musculus GN=Ighm PE=1 SV=2                                                 | 15.19824 | 6  | 14  | 6  | 49.94  | 7.01 | 6500000  | 7300000  | 6800000  | 44.28052 |
| Q3UX10   | Tubulin alpha chain-like 3 OS=Mus musculus GN=Tuba13 PE=2 SV=2                                         | 5.381166 | 2  | 7   | 1  | 49.956 | 5.58 | 780000   |          |          | 15.92858 |
| Q4PJX1   | Protein odr-4 homolog OS=Mus musculus GN=Odr4 PE=1 SV=2                                                | 8.277405 | 3  | 4   | 3  | 49.966 | 6.14 | 1100000  | 350000   |          | 10.57119 |
| Q3U5Q7   | UMP-CMP kinase 2, mitochondrial OS=Mus musculus GN=Cmpk2 PE=1 SV=2                                     | 5.816555 | 2  | 4   | 2  | 50.005 | 7.27 |          | 1700000  | 1500000  | 13.17001 |
| Q9D8N0   | Elongation factor 1-gamma OS=Mus musculus GN=Eef1g PE=1 SV=3                                           | 20.59497 | 10 | 46  | 10 | 50.029 | 6.74 | 46000000 | 38000000 | 39000000 | 139.9644 |
| Q922F4   | Tubulin beta-6 chain OS=Mus musculus GN=Tubb6 PE=1 SV=1                                                | 38.47875 | 15 | 68  | 5  | 50.058 | 4.89 | 3800000  | 3500000  | 2300000  | 206.424  |
| P10126   | Elongation factor 1-alpha 1 OS=Mus musculus GN=Eef1a1 PE=1 SV=3                                        | 25.97403 | 11 | 61  | 5  | 50.082 | 9.01 | 1.1E+08  | 59000000 | 65000000 | 169.2116 |
| Q922I9   | Succinate--CoA ligase [ADP-forming] subunit beta, mitochondrial OS=Mus musculus GN=Sucla2 PE=1 SV=2    | 15.55076 | 7  | 27  | 7  | 50.082 | 7.01 | 8400000  | 6300000  | 5600000  | 81.63161 |
| P68369   | Tubulin alpha-1A chain OS=Mus musculus GN=Tuba1a PE=1 SV=1                                             | 54.32373 | 18 | 81  | 1  | 50.104 | 5.06 | 4500000  | 6400000  | 9400000  | 247.524  |
| Q8BVK9   | Sp110 nuclear body protein OS=Mus musculus GN=Sp110 PE=1 SV=1                                          | 25.8427  | 9  | 21  | 9  | 50.109 | 9.86 | 5000000  | 6000000  | 6600000  | 63.74743 |
| Q61398   | Procollagen C-endopeptidase enhancer 1 OS=Mus musculus GN=Pcolce PE=1 SV=2                             | 5.982906 | 2  | 3   | 2  | 50.136 | 8.41 | 1900000  | 1900000  |          | 8.516149 |
| P30204   | Macrophage scavenger receptor types I and II OS=Mus musculus GN=Msr1 PE=1 SV=3                         | 2.401747 | 1  | 4   | 1  | 50.138 | 6.54 | 220000   | 700000   | 720000   | 9.583202 |
| Q9VWH9   | Fibulin-5 OS=Mus musculus GN=Fbln5 PE=1 SV=1                                                           | 6.473214 | 2  | 7   | 2  | 50.16  | 4.7  | 1400000  | 1500000  | 820000   | 13.80721 |
| P60122   | RuvB-like 1 OS=Mus musculus GN=Ruvbl1 PE=1 SV=1                                                        | 25       | 8  | 21  | 8  | 50.182 | 6.42 | 6500000  | 5800000  | 4500000  | 69.30861 |
| Q8BIW1   | Protein prune homolog OS=Mus musculus GN=Prune PE=1 SV=1                                               | 2.422907 | 1  | 1   | 1  | 50.208 | 5.11 |          | 1200000  |          | 2.070529 |
| Q9R112   | Sulfide:quinone oxidoreductase, mitochondrial OS=Mus musculus GN=Sqrld PE=1 SV=3                       | 8.888889 | 3  | 5   | 3  | 50.25  | 9.09 | 800000   | 1700000  | 1200000  | 13.82495 |
| P81117   | Nucleobindin-2 OS=Mus musculus GN=Nucb2 PE=1 SV=2                                                      | 6.190476 | 2  | 4   | 2  | 50.273 | 5.15 |          | 870000   | 580000   | 11.56099 |
| P11680   | Properdin OS=Mus musculus GN=Cfp PE=2 SV=2                                                             | 4.094828 | 1  | 1   | 1  | 50.293 | 7.84 | 260000   |          |          | 3.6918   |
| Q61029   | Lamina-associated polypeptide 2, isoforms beta/delta/epsilon/gamma OS=Mus musculus GN=Tmpo PE=1 SV=4   | 44.46903 | 14 | 39  | 6  | 50.342 | 9.45 | 22000000 | 18000000 | 19000000 | 133.1204 |
| Q5FWK3   | Rho GTPase-activating protein 1 OS=Mus musculus GN=Arhgap1 PE=1 SV=1                                   | 5.23918  | 2  | 5   | 2  | 50.379 | 6.44 | 2100000  | 1500000  | 1500000  | 16.28321 |
| Q9ERD7   | Tubulin beta-3 chain OS=Mus musculus GN=Tubb3 PE=1 SV=1                                                | 43.55556 | 17 | 115 | 4  | 50.386 | 4.93 | 26000000 | 18000000 | 17000000 | 379.6028 |
| Q8BVY0   | Ribosomal L1 domain-containing protein 1 OS=Mus musculus GN=Rsl1d1 PE=1 SV=1                           | 15.48673 | 4  | 18  | 4  | 50.39  | 9.98 | 12000000 | 13000000 | 13000000 | 67.41956 |
| P62631   | Elongation factor 1-alpha 2 OS=Mus musculus GN=Eef1a2 PE=1 SV=1                                        | 19.00648 | 9  | 34  | 3  | 50.422 | 9.03 | 3600000  | 3200000  | 6800000  | 91.42937 |
| P47739   | Aldehyde dehydrogenase, dimeric NADP-preferring OS=Mus musculus GN=Aldh3a1 PE=1 SV=2                   | 1.545254 | 1  | 2   | 1  | 50.449 | 6.95 | 24000000 | 27000000 |          | 4.879407 |
| Q9QZ18   | Serine incorporator 1 OS=Mus musculus GN=Serinc1 PE=1 SV=1                                             | 3.752759 | 1  | 2   | 1  | 50.475 | 6.28 | 540000   | 510000   |          | 6.548812 |
| P50396   | Rab GDP dissociation inhibitor alpha OS=Mus musculus GN=Gdi1 PE=1 SV=3                                 | 26.39821 | 10 | 25  | 6  | 50.489 | 5.08 | 10000000 | 7400000  | 8400000  | 79.28933 |
| Q6KB66-1 | SWISS-PROT:Q6KB66-1 Tax_id=9606 Gene_Symbol=KRT80 Isoform 1 of Keratin, type II cytoskeletal 80        | 4.646018 | 2  | 2   | 2  | 50.494 | 5.67 |          |          | 830000   | 5.185039 |
| Q61598   | Rab GDP dissociation inhibitor beta OS=Mus musculus GN=Gdi2 PE=1 SV=1                                  | 31.46067 | 11 | 29  | 7  | 50.505 | 6.25 | 7800000  | 8000000  | 6700000  | 84.84831 |
| Q8K2F8   | Protein LSM14 homolog A OS=Mus musculus GN=Lsm14a PE=1 SV=1                                            | 9.95671  | 3  | 8   | 3  | 50.515 | 9.52 | 2600000  | 2700000  | 1500000  | 20.92413 |
| O55131   | Septin-7 OS=Mus musculus GN=Sept7 PE=1 SV=1                                                            | 30.04587 | 12 | 43  | 11 | 50.518 | 8.57 | 50000000 | 38000000 | 37000000 | 116.9605 |
| Q9R0X4   | Acyl-coenzyme A thioesterase 9, mitochondrial OS=Mus musculus GN=Acot9 PE=1 SV=1                       | 6.605923 | 3  | 5   | 3  | 50.528 | 8.59 | 1900000  | 1300000  | 1200000  | 10.75134 |
| Q921J3   | Cysteine desulfurase, mitochondrial OS=Mus musculus GN=Nfs1 PE=1 SV=3                                  | 2.614379 | 1  | 2   | 1  | 50.538 | 8.16 | 460000   |          | 450000   | 5.026082 |
| Q61644   | Protein kinase C and casein kinase substrate in neurons protein 1 OS=Mus musculus GN=Pacsin1 PE=1 SV=1 | 17.0068  | 6  | 17  | 6  | 50.544 | 5.24 | 15000000 | 4700000  | 5200000  | 58.5154  |
| Q9CWX9   | Probable ATP-dependent RNA helicase DDX47 OS=Mus musculus GN=Ddx47 PE=2 SV=2                           | 5.054945 | 2  | 4   | 2  | 50.607 | 9.1  | 2500000  | 500000   | 2000000  | 10.31064 |
| Q8BH60   | Golgi-associated PDZ and coiled-coil motif-containing protein OS=Mus musculus GN=Gopc PE=1 SV=1        | 8.423326 | 2  | 6   | 2  | 50.631 | 6.25 | 1500000  | 1700000  | 1700000  | 21.42837 |
| Q924S8   | Sprouty-related, EVH1 domain-containing protein 1 OS=Mus musculus GN=Spred1 PE=1 SV=1                  | 4.279279 | 1  | 1   | 1  | 50.631 | 6.47 |          |          |          | 3.505178 |
| P41241   | Tyrosine-protein kinase CSK OS=Mus musculus GN=Csk PE=1 SV=2                                           | 7.111111 | 2  | 4   | 2  | 50.684 | 7.06 | 1500000  | 1800000  | 2100000  | 12.63773 |
| Q9JJK2   | LanC-like protein 2 OS=Mus musculus GN=Lancl2 PE=1 SV=1                                                | 4.888889 | 2  | 6   | 2  | 50.745 | 7.28 | 1800000  | 2100000  | 1500000  | 16.25569 |

|        |                                                                                                                        |          |    |    |    |        |      |          |          |          |          |
|--------|------------------------------------------------------------------------------------------------------------------------|----------|----|----|----|--------|------|----------|----------|----------|----------|
| Q8K3G5 | Inactive serine/threonine-protein kinase VRK3 OS=Mus musculus GN=Vrk3 PE=1 SV=2                                        | 9.933775 | 2  | 4  | 2  | 50.798 | 8.57 | 1100000  | 1200000  | 1100000  | 16.47592 |
| Q91YT0 | NADH dehydrogenase [ubiquinone] flavoprotein 1, mitochondrial OS=Mus musculus GN=Ndufv1 PE=1 SV=1                      | 20.0431  | 8  | 16 | 8  | 50.802 | 8.21 | 7900000  | 5600000  | 5200000  | 46.56507 |
| P54071 | Isocitrate dehydrogenase [NADP], mitochondrial OS=Mus musculus GN=idh2 PE=1 SV=3                                       | 10.61947 | 4  | 12 | 4  | 50.874 | 8.69 | 5800000  | 4200000  | 3400000  | 33.33736 |
| Q8R071 | Inositol-triphosphate 3-kinase A OS=Mus musculus GN=Itpka PE=1 SV=1                                                    | 2.178649 | 1  | 1  | 1  | 50.903 | 7.72 | 290000   |          |          | 2.197409 |
| P70347 | TRAF family member-associated NF-kappa-B activator OS=Mus musculus GN=Tank PE=1 SV=1                                   | 3.348214 | 1  | 1  | 1  | 50.907 | 5.88 | 740000   |          |          | 2.097717 |
| Q8CI32 | BAG family molecular chaperone regulator 5 OS=Mus musculus GN=Bag5 PE=1 SV=1                                           | 6.935123 | 2  | 5  | 2  | 50.911 | 6.05 | 1200000  | 890000   | 1300000  | 12.9305  |
| Q99J72 | DNA dC->dU-editing enzyme APOBEC-3 OS=Mus musculus GN=Apobec3 PE=1 SV=2                                                | 9.79021  | 4  | 7  | 4  | 50.915 | 8.94 | 2500000  | 1300000  | 1300000  | 19.14211 |
| P61979 | Heterogeneous nuclear ribonucleoprotein K OS=Mus musculus GN=Hnrnpk PE=1 SV=1                                          | 33.26134 | 16 | 69 | 16 | 50.944 | 5.54 | 76000000 | 66000000 | 62000000 | 201.0945 |
| O89053 | Coronin-1A OS=Mus musculus GN=Coro1a PE=1 SV=5                                                                         | 28.85033 | 14 | 50 | 14 | 50.957 | 6.48 | 56000000 | 50000000 | 41000000 | 134.2528 |
| Q9R111 | Guanine deaminase OS=Mus musculus GN=Gda PE=1 SV=1                                                                     | 11.89427 | 5  | 12 | 5  | 50.981 | 5.53 | 3300000  | 2000000  | 3200000  | 29.44256 |
| Q921V5 | Alpha-1,6-mannosyl-glycoprotein 2-beta-N-acetylglucosaminyltransferase OS=Mus musculus GN=Mgat2 PE=1 SV=1              | 3.393665 | 1  | 1  | 1  | 50.997 | 8.59 |          | 1900000  |          | 2.269545 |
| Q9Z0N1 | Eukaryotic translation initiation factor 2 subunit 3, X-linked OS=Mus musculus GN=Eif2s3x PE=1 SV=2                    | 19.70339 | 7  | 17 | 7  | 51.033 | 8.4  | 5900000  | 9900000  | 8800000  | 51.07522 |
| Q8BLY1 | SPARC-related modular calcium-binding protein 1 OS=Mus musculus GN=Smoc1 PE=2 SV=2                                     | 2.37581  | 1  | 1  | 1  | 51.043 | 8.37 |          | 510000   |          | 2.14625  |
| O35857 | Mitochondrial import inner membrane translocase subunit TIM44 OS=Mus musculus GN=Timm44 PE=1 SV=2                      | 3.097345 | 1  | 2  | 1  | 51.059 | 8.13 | 2300000  |          | 830000   | 5.300995 |
| P83887 | Tubulin gamma-1 chain OS=Mus musculus GN=Tubg1 PE=1 SV=1                                                               | 1.995565 | 1  | 3  | 1  | 51.069 | 6.02 | 2300000  | 1600000  | 1900000  | 6.942805 |
| Q9WMT5 | RuvB-like 2 OS=Mus musculus GN=Ruvbl2 PE=1 SV=3                                                                        | 21.38229 | 8  | 17 | 8  | 51.081 | 5.64 | 9700000  | 10000000 | 8900000  | 50.53304 |
| Q76LS9 | Ubiquitin carboxyl-terminal hydrolase MINDY-1 OS=Mus musculus GN=Fam63a PE=1 SV=1                                      | 4.273504 | 1  | 1  | 1  | 51.194 | 4.73 |          | 1400000  |          | 3.545945 |
| P08779 | SWISS-PROT:P08779 Tax_Id=9606 Gene_Symbol=KRT16 Keratin, type I cytoskeletal 16                                        | 54.75687 | 24 | 67 | 11 | 51.236 | 5.05 | 3100000  | 2400000  | 26000000 | 187.3994 |
| P06332 | T-cell surface glycoprotein CD4 OS=Mus musculus GN=Cd4 PE=1 SV=1                                                       | 3.063457 | 1  | 1  | 1  | 51.264 | 9.16 | 510000   |          |          | 3.62666  |
| Q99L43 | Phosphatidate cytidyltransferase 2 OS=Mus musculus GN=Cds2 PE=1 SV=1                                                   | 4.279279 | 1  | 6  | 1  | 51.28  | 7.05 | 12000000 | 7400000  | 9000000  | 21.98853 |
| Q91X72 | Hemopexin OS=Mus musculus GN=Hpx PE=1 SV=2                                                                             | 3.26087  | 1  | 3  | 1  | 51.285 | 7.8  | 630000   | 630000   | 890000   | 10.47535 |
| O55222 | Integrin-linked protein kinase OS=Mus musculus GN=Ilk PE=1 SV=2                                                        | 8.628319 | 4  | 5  | 4  | 51.34  | 8.07 | 2200000  | 2900000  |          | 10.70155 |
| Q99JY0 | Trifunctional enzyme subunit beta, mitochondrial OS=Mus musculus GN=Hadhb PE=1 SV=1                                    | 18.52632 | 8  | 21 | 8  | 51.353 | 9.38 | 9000000  | 5500000  | 7900000  | 54.81621 |
| Q5SUF2 | Luc7-like protein 3 OS=Mus musculus GN=Luc7l3 PE=1 SV=1                                                                | 13.65741 | 4  | 9  | 4  | 51.419 | 9.77 | 3800000  | 4200000  | 2800000  | 30.44261 |
| Q6PAC3 | DDB1- and CUL4-associated factor 13 OS=Mus musculus GN=Dcaf13 PE=2 SV=2                                                | 9.438202 | 3  | 7  | 3  | 51.423 | 9.32 | 980000   | 1800000  | 1200000  | 18.55675 |
| P40124 | Adenylyl cyclase-associated protein 1 OS=Mus musculus GN=Cap1 PE=1 SV=4                                                | 28.05907 | 9  | 32 | 9  | 51.532 | 7.52 | 11000000 | 11000000 | 9500000  | 108.643  |
| P30416 | Peptidyl-prolyl cis-trans isomerase FKBP4 OS=Mus musculus GN=Fkbp4 PE=1 SV=5                                           | 26.63755 | 11 | 29 | 11 | 51.54  | 5.72 | 12000000 | 11000000 | 9600000  | 84.91546 |
| P61202 | COP9 signalosome complex subunit 2 OS=Mus musculus GN=Cops2 PE=1 SV=1                                                  | 5.417607 | 2  | 4  | 2  | 51.564 | 5.53 | 2200000  | 2200000  | 360000   | 11.63576 |
| P58242 | Acid sphingomyelinase-like phosphodiesterase 3b OS=Mus musculus GN=Smpd3b PE=1 SV=1                                    | 1.973684 | 1  | 2  | 1  | 51.567 | 6.43 | 2300000  | 1900000  |          | 4.998693 |
| Q8BTJ4 | Bis(5'-adenosyl)-triphosphatase enpp4 OS=Mus musculus GN=Enpp4 PE=1 SV=1                                               | 2.631579 | 1  | 2  | 1  | 51.578 | 6.73 | 2200000  | 1500000  |          | 5.449318 |
| P02533 | SWISS-PROT:P02533 Tax_Id=9606 Gene_Symbol=KRT14 Keratin, type I cytoskeletal 14                                        | 54.23729 | 25 | 80 | 5  | 51.589 | 5.16 | 16000000 | 7800000  | 70000000 | 228.052  |
| Q06890 | Clusterin OS=Mus musculus GN=Clu PE=1 SV=1                                                                             | 29.6875  | 11 | 35 | 11 | 51.623 | 5.67 | 14000000 | 11000000 | 9700000  | 112.8728 |
| Q8VDD8 | WAS protein family homolog 1 OS=Mus musculus GN=Wash1 PE=1 SV=1                                                        | 12.21053 | 4  | 6  | 4  | 51.627 | 5.44 | 1400000  | 1300000  | 1400000  | 16.21618 |
| Q2NL51 | Glycogen synthase kinase-3 alpha OS=Mus musculus GN=Gsk3a PE=1 SV=2                                                    | 4.897959 | 2  | 2  | 1  | 51.628 | 8.81 |          |          |          | 4.308114 |
| P27808 | Alpha-1,3-mannosyl-glycoprotein 2-beta-N-acetylglucosaminyltransferase OS=Mus musculus GN=Mgat1 PE=1 SV=1              | 3.579418 | 1  | 3  | 1  | 51.658 | 8.9  | 1100000  | 1200000  | 1600000  | 11.24547 |
| Q6P1F6 | Serine/threonine-protein phosphatase 2A 55 kDa regulatory subunit B alpha isoform OS=Mus musculus GN=Ppp2r2a PE=1 SV=1 | 8.277405 | 3  | 7  | 3  | 51.659 | 6.2  | 4800000  | 3500000  | 4600000  | 20.95514 |
| Q8BM72 | Heat shock 70 kDa protein 13 OS=Mus musculus GN=Hspa13 PE=1 SV=1                                                       | 10.4034  | 4  | 10 | 4  | 51.677 | 5.63 | 1500000  | 1000000  | 1000000  | 24.22155 |
| Q9CZU6 | Citrate synthase, mitochondrial OS=Mus musculus GN=Cs PE=1 SV=1                                                        | 20.25862 | 10 | 24 | 10 | 51.703 | 8.57 | 36000000 | 33000000 | 26000000 | 63.44998 |
| Q91YJ2 | Sorting nexin-4 OS=Mus musculus GN=Snx4 PE=1 SV=1                                                                      | 8.666667 | 3  | 5  | 3  | 51.745 | 5.8  | 1900000  | 1800000  | 540000   | 14.67233 |
| Q3UFK8 | FERM domain-containing protein 8 OS=Mus musculus GN=Frmd8 PE=1 SV=2                                                    | 9.871245 | 3  | 7  | 3  | 51.795 | 6.44 | 1100000  | 1400000  | 1500000  | 16.4374  |
| P97855 | Ras GTPase-activating protein-binding protein 1 OS=Mus musculus GN=G3bp1 PE=1 SV=1                                     | 20.43011 | 7  | 17 | 7  | 51.797 | 5.59 | 6000000  | 6200000  | 5000000  | 53.90018 |
| Q9DA19 | Corepressor interacting with RBP1 OS=Mus musculus GN=Cir1 PE=1 SV=2                                                    | 3.111111 | 1  | 1  | 1  | 51.806 | 9.92 |          | 520000   |          | 2.178396 |
| Q8CI78 | Required for meiotic nuclear division protein 1 homolog OS=Mus musculus GN=Rmnd1 PE=1 SV=1                             | 5.555556 | 2  | 2  | 2  | 51.81  | 7.99 | 440000   | 360000   |          | 5.48125  |
| Q8BXZ1 | Protein disulfide-isomerase TMX3 OS=Mus musculus GN=Tmx3 PE=1 SV=2                                                     | 10.52632 | 4  | 11 | 4  | 51.815 | 5.16 | 7700000  | 8200000  | 7900000  | 36.45691 |
| Q8BGH2 | Sorting and assembly machinery component 50 homolog OS=Mus musculus GN=Samm50 PE=1 SV=1                                | 6.609808 | 2  | 5  | 2  | 51.831 | 6.8  | 2300000  | 710000   | 610000   | 9.230119 |
| Q9CQU1 | Microfibrillar-associated protein 1 OS=Mus musculus GN=Mfap1 PE=1 SV=1                                                 | 16.6287  | 4  | 9  | 4  | 51.923 | 4.98 | 1200000  | 2000000  | 2400000  | 22.48174 |
| Q62376 | U1 small nuclear ribonucleoprotein 70 kDa OS=Mus musculus GN=Snrnp70 PE=1 SV=2                                         | 36.38393 | 12 | 36 | 12 | 51.961 | 9.94 | 16000000 | 15000000 | 15000000 | 111.008  |
| Q3UJU9 | Regulator of microtubule dynamics protein 3 OS=Mus musculus GN=Rmdn3 PE=1 SV=2                                         | 15.31915 | 5  | 14 | 5  | 51.997 | 5.21 | 3500000  | 3700000  | 3700000  | 42.28756 |
| P28659 | CUGBP Elav-like family member 1 OS=Mus musculus GN=Celf1 PE=1 SV=2                                                     | 2.674897 | 1  | 1  | 1  | 52.074 | 8.46 |          | 2600000  |          | 2.820326 |
| Q91WM3 | U3 small nucleolar RNA-interacting protein 2 OS=Mus musculus GN=Rrp9 PE=1 SV=1                                         | 11.57895 | 5  | 9  | 5  | 52.075 | 7.88 | 1500000  | 2400000  | 2200000  | 23.21111 |
| Q8BKE6 | Cytochrome P450 20A1 OS=Mus musculus GN=Cyp20a1 PE=1 SV=1                                                              | 19.48052 | 7  | 11 | 7  | 52.116 | 6.95 | 3600000  | 4300000  | 2700000  | 31.77752 |
| Q6P5G6 | UBX domain-containing protein 7 OS=Mus musculus GN=Ubxn7 PE=1 SV=2                                                     | 2.997859 | 1  | 1  | 1  | 52.132 | 5.03 |          |          | 780000   | 2.899275 |
| Q9Z2W0 | Aspartyl aminopeptidase OS=Mus musculus GN=Dnpep PE=1 SV=2                                                             | 10.99366 | 4  | 9  | 4  | 52.174 | 7.25 | 2300000  | 2100000  | 1900000  | 24.47684 |

|        |                                                                                                                            |          |    |    |    |        |       |          |          |          |          |
|--------|----------------------------------------------------------------------------------------------------------------------------|----------|----|----|----|--------|-------|----------|----------|----------|----------|
| P60229 | Eukaryotic translation initiation factor 3 subunit E OS=Mus musculus GN=Eif3e PE=1 SV=1                                    | 27.19101 | 11 | 29 | 11 | 52.187 | 6.04  | 12000000 | 12000000 | 7400000  | 78.68414 |
| P70290 | 55 kDa erythrocyte membrane protein OS=Mus musculus GN=Mpp1 PE=1 SV=1                                                      | 1.93133  | 1  | 1  | 1  | 52.194 | 7.2   | 790000   |          |          | 2.437427 |
| P61620 | Protein transport protein Sec61 subunit alpha isoform 1 OS=Mus musculus GN=Sec61a1 PE=1 SV=2                               | 8.613445 | 4  | 8  | 4  | 52.231 | 8.06  | 5400000  | 860000   | 7200000  | 16.93311 |
| Q8CBW3 | Abl interactor 1 OS=Mus musculus GN=Abi1 PE=1 SV=3                                                                         | 6.860707 | 3  | 6  | 2  | 52.255 | 7.64  | 2900000  | 2400000  | 1700000  | 18.4411  |
| Q9Z2D6 | Methyl-CpG-binding protein 2 OS=Mus musculus GN=Mecp2 PE=1 SV=1                                                            | 19.00826 | 6  | 16 | 6  | 52.275 | 9.96  | 2900000  | 3200000  | 2100000  | 57.07639 |
| Q920L1 | Fatty acid desaturase 1 OS=Mus musculus GN=Fads1 PE=1 SV=1                                                                 | 2.013423 | 1  | 1  | 1  | 52.289 | 9.29  |          | 450000   |          | 2.261339 |
| P46938 | Transcriptional coactivator YAP1 OS=Mus musculus GN=Yap1 PE=1 SV=2                                                         | 3.483607 | 1  | 1  | 1  | 52.351 | 5.11  |          | 120000   |          | 3.094217 |
| Q8C650 | Septin-10 OS=Mus musculus GN=Sept10 PE=1 SV=1                                                                              | 4.646018 | 2  | 7  | 1  | 52.388 | 6.6   | 3800000  | 3400000  | 3100000  | 18.91764 |
| Q9EPK6 | Nucleotide exchange factor SIL1 OS=Mus musculus GN=Sil1 PE=1 SV=2                                                          | 3.655914 | 1  | 1  | 1  | 52.397 | 5.27  | 420000   |          |          | 2.270218 |
| Q99M87 | Dnal homolog subfamily A member 3, mitochondrial OS=Mus musculus GN=Dna3 PE=1 SV=1                                         | 5.833333 | 2  | 5  | 2  | 52.41  | 9.22  | 2100000  | 1400000  | 710000   | 12.96625 |
| Q3TDN2 | FAS-associated factor 2 OS=Mus musculus GN=Faf2 PE=1 SV=2                                                                  | 4.719101 | 2  | 5  | 2  | 52.438 | 5.47  | 1400000  | 1800000  | 1200000  | 14.47376 |
| Q8CFE3 | REST corepressor 1 OS=Mus musculus GN=Rcor1 PE=1 SV=2                                                                      | 6.498952 | 2  | 4  | 2  | 52.461 | 7.03  | 1300000  | 1500000  | 1900000  | 13.60282 |
| Q8R016 | Bleomycin hydrolase OS=Mus musculus GN=Blmh PE=1 SV=1                                                                      | 5.494505 | 2  | 5  | 2  | 52.477 | 6.48  | 2200000  | 1700000  | 5100000  | 14.30822 |
| Q99K23 | Ufm1-specific protease 2 OS=Mus musculus GN=Ufsp2 PE=1 SV=1                                                                | 2.386117 | 1  | 1  | 1  | 52.482 | 6.76  |          | 2100000  |          | 2.118114 |
| D3Z6Q9 | Bridging integrator 2 OS=Mus musculus GN=Bin2 PE=1 SV=1                                                                    | 7.157464 | 3  | 7  | 2  | 52.522 | 5.34  | 3500000  | 1500000  | 290000   | 21.61505 |
| Q9CT10 | Ran-binding protein 3 OS=Mus musculus GN=Ranbp3 PE=1 SV=2                                                                  | 6.924644 | 2  | 4  | 2  | 52.541 | 5.12  | 260000   | 390000   | 220000   | 15.20976 |
| Q9D379 | Epoxide hydrolase 1 OS=Mus musculus GN=Ephx1 PE=1 SV=2                                                                     | 1.978022 | 1  | 3  | 1  | 52.543 | 8.35  | 870000   | 690000   | 550000   | 6.42619  |
| Q91WD5 | NADH dehydrogenase [ubiquinone] iron-sulfur protein 2, mitochondrial OS=Mus musculus GN=Ndufs2 PE=1 SV=1                   | 6.695464 | 3  | 9  | 3  | 52.592 | 6.99  | 5200000  | 4000000  | 4200000  | 25.30415 |
| P08414 | Calcium/calmodulin-dependent protein kinase type IV OS=Mus musculus GN=Camk4 PE=1 SV=2                                     | 3.411514 | 1  | 1  | 1  | 52.594 | 4.93  | 140000   |          |          | 2.360332 |
| P49769 | Presenilin-1 OS=Mus musculus GN=Psen1 PE=1 SV=1                                                                            | 4.068522 | 1  | 1  | 1  | 52.606 | 5.38  |          |          | 430000   | 2.57953  |
| P70402 | Myosin-binding protein H OS=Mus musculus GN=Mybph PE=2 SV=2                                                                | 1.656315 | 1  | 2  | 1  | 52.609 | 6.1   | 290000   | 4900000  |          | 3.933234 |
| Q99JR5 | Tubulointerstitial nephritis antigen-like OS=Mus musculus GN=Tinag1 PE=1 SV=1                                              | 6.866953 | 2  | 6  | 2  | 52.63  | 6.77  | 2700000  | 2500000  | 2100000  | 20.09169 |
| P56959 | RNA-binding protein FUS OS=Mus musculus GN=Fus PE=1 SV=1                                                                   | 14.09266 | 5  | 23 | 5  | 52.642 | 9.36  | 37000000 | 30000000 | 24000000 | 62.71459 |
| Q9WTJ4 | FIt3-interacting zinc finger protein 1 OS=Mus musculus GN=Fiz1 PE=1 SV=1                                                   | 6        | 1  | 1  | 1  | 52.652 | 7.94  |          | 460000   |          | 3.181532 |
| Q08857 | Platelet glycoprotein 4 OS=Mus musculus GN=Cd36 PE=1 SV=2                                                                  | 2.542373 | 1  | 2  | 1  | 52.664 | 8.35  | 1500000  | 1400000  |          | 5.326244 |
| Q91YU8 | Suppressor of SWI4 1 homolog OS=Mus musculus GN=Ppan PE=1 SV=2                                                             | 5.744681 | 2  | 2  | 2  | 52.724 | 10.32 |          |          | 4200000  | 6.160155 |
| Q9D1A2 | Cytosolic non-specific dipeptidase OS=Mus musculus GN=Cndp2 PE=1 SV=1                                                      | 6.105263 | 2  | 6  | 2  | 52.734 | 5.66  | 1700000  | 1100000  | 760000   | 15.73093 |
| Q9JMD0 | BUB3-interacting and GLEBS motif-containing protein ZNF207 OS=Mus musculus GN=Znf207 PE=1 SV=1                             | 2.626263 | 1  | 3  | 1  | 52.758 | 9.1   | 2700000  | 2700000  | 2200000  | 9.445307 |
| Q9C213 | Cytochrome b-c1 complex subunit 1, mitochondrial OS=Mus musculus GN=Uqcrc1 PE=1 SV=2                                       | 28.33333 | 11 | 28 | 11 | 52.819 | 6.21  | 24000000 | 16000000 | 14000000 | 90.45197 |
| Q9CYT6 | Adenylyl cyclase-associated protein 2 OS=Mus musculus GN=Cap2 PE=1 SV=1                                                    | 8.403361 | 3  | 6  | 3  | 52.829 | 6.43  | 2000000  | 1100000  | 1100000  | 18.14563 |
| Q9D8W5 | 26S proteasome non-ATPase regulatory subunit 12 OS=Mus musculus GN=Psm12 PE=1 SV=4                                         | 14.91228 | 5  | 11 | 5  | 52.861 | 7.06  | 1200000  | 1100000  | 1000000  | 36.73282 |
| Q8BMD8 | Calcium-binding mitochondrial carrier protein SCaMC-1 OS=Mus musculus GN=Slc25a24 PE=1 SV=1                                | 1.684211 | 1  | 2  | 1  | 52.868 | 7.43  |          | 6000000  | 5400000  | 4.500354 |
| O08663 | Methionine aminopeptidase 2 OS=Mus musculus GN=Metap2 PE=1 SV=1                                                            | 25.52301 | 10 | 37 | 10 | 52.888 | 5.82  | 12000000 | 12000000 | 10000000 | 115.6377 |
| D3YZP9 | Coiled-coil domain-containing protein 6 OS=Mus musculus GN=Ccdc6 PE=1 SV=1                                                 | 15.13859 | 6  | 9  | 6  | 52.906 | 7.34  | 3100000  | 2200000  | 1300000  | 21.8118  |
| Q9D394 | Protein RUFY3 OS=Mus musculus GN=Rufy3 PE=1 SV=1                                                                           | 10.66098 | 4  | 8  | 4  | 52.973 | 5.49  | 2400000  | 1600000  | 1800000  | 23.37296 |
| Q8CBY8 | Dynactin subunit 4 OS=Mus musculus GN=Dctn4 PE=1 SV=1                                                                      | 5.353319 | 1  | 1  | 1  | 53.023 | 7.72  | 210000   |          |          | 0        |
| Q9WUM4 | Coronin-1C OS=Mus musculus GN=Coro1c PE=1 SV=2                                                                             | 15.82278 | 7  | 18 | 7  | 53.087 | 7.08  | 8400000  | 8400000  | 8200000  | 50.97341 |
| Q9JI44 | DNA methyltransferase 1-associated protein 1 OS=Mus musculus GN=Dmap1 PE=1 SV=1                                            | 7.264957 | 2  | 3  | 2  | 53.097 | 9.5   | 1400000  |          | 1800000  | 9.961209 |
| Q8VEJ4 | Notchless protein homolog 1 OS=Mus musculus GN=Nle1 PE=1 SV=4                                                              | 2.474227 | 1  | 1  | 1  | 53.101 | 7.17  | 550000   |          |          | 1.878667 |
| A2A6T1 | Cerebellar degeneration-related protein 2-like OS=Mus musculus GN=Cdr2l PE=1 SV=1                                          | 2.150538 | 1  | 1  | 1  | 53.18  | 5.76  | 460000   |          |          | 2.533263 |
| Q9D8T2 | Gasdermin-D OS=Mus musculus GN=Gsdmdc1 PE=1 SV=1                                                                           | 4.517454 | 2  | 3  | 2  | 53.204 | 5.1   | 730000   |          | 880000   | 6.071541 |
| Q9DCD0 | 6-phosphogluconate dehydrogenase, decarboxylating OS=Mus musculus GN=Pgd PE=1 SV=3                                         | 24.84472 | 9  | 24 | 9  | 53.213 | 7.23  | 10000000 | 9600000  | 5000000  | 72.05903 |
| P53395 | Lipoamide acyltransferase component of branched-chain alpha-keto acid dehydrogenase complex, mitochondrial OS=Mus musculus | 1.86722  | 1  | 3  | 1  | 53.213 | 8.6   | 1600000  | 1100000  | 960000   | 8.069823 |
| P97861 | Keratin, type II cuticular Hb6 OS=Mus musculus GN=Krt86 PE=2 SV=2                                                          | 52.26337 | 27 | 81 | 8  | 53.217 | 5.76  | 11000000 | 14000000 | 27000000 | 242.6163 |
| Q63850 | Nuclear pore glycoprotein p62 OS=Mus musculus GN=Nup62 PE=1 SV=2                                                           | 4.562738 | 2  | 6  | 2  | 53.222 | 5.31  | 1500000  | 1400000  | 1500000  | 18.06622 |
| Q00493 | Carboxypeptidase E OS=Mus musculus GN=Cpe PE=1 SV=2                                                                        | 3.781513 | 2  | 3  | 2  | 53.222 | 5.19  | 1500000  |          | 1100000  | 7.198116 |
| P53986 | Monocarboxylate transporter 1 OS=Mus musculus GN=Slc16a1 PE=1 SV=1                                                         | 6.693712 | 2  | 6  | 2  | 53.232 | 7.47  | 6600000  | 6400000  | 6200000  | 18.96536 |
| Q9D0L8 | mRNA cap guanine-N7 methyltransferase OS=Mus musculus GN=Rnmt PE=1 SV=1                                                    | 9.247312 | 4  | 9  | 4  | 53.258 | 6.48  | 1900000  | 1900000  | 1600000  | 22.92646 |
| Q9QZL0 | Receptor-interacting serine/threonine-protein kinase 3 OS=Mus musculus GN=Ripk3 PE=1 SV=2                                  | 2.880658 | 1  | 2  | 1  | 53.289 | 7.53  | 880000   | 990000   |          | 6.628897 |
| Q9R0M4 | Podocalyxin OS=Mus musculus GN=Podxl PE=1 SV=2                                                                             | 2.982107 | 1  | 1  | 1  | 53.356 | 4.97  | 1800000  |          |          | 2.752218 |
| P70257 | Nuclear factor 1 X-type OS=Mus musculus GN=Nfix PE=1 SV=2                                                                  | 2.04918  | 1  | 1  | 1  | 53.361 | 8.68  |          |          | 410000   | 2.304252 |
| Q9JI13 | Something about silencing protein 10 OS=Mus musculus GN=Utp3 PE=1 SV=1                                                     | 11.30064 | 3  | 7  | 3  | 53.367 | 5.54  | 1500000  | 1700000  | 1800000  | 24.11856 |
| Q02819 | Nucleobindin-1 OS=Mus musculus GN=Nucb1 PE=1 SV=2                                                                          | 30.50109 | 11 | 29 | 11 | 53.376 | 5.07  | 5500000  | 7300000  | 6200000  | 93.42273 |



|           |                                                                                                                        |          |          |     |    |        |        |          |          |          |          |          |
|-----------|------------------------------------------------------------------------------------------------------------------------|----------|----------|-----|----|--------|--------|----------|----------|----------|----------|----------|
| Q99LD4    | COP9 signalosome complex subunit 1 OS=Mus musculus GN=Gps1 PE=1 SV=1                                                   | 7.643312 | 3        | 7   | 3  | 53.408 | 6.84   | 2600000  | 2500000  | 1800000  | 18.81662 |          |
| P31001    | Desmin OS=Mus musculus GN=Des PE=1 SV=3                                                                                | 11.51386 | 6        | 28  | 2  | 53.465 | 5.27   | 900000   | 1300000  | 990000   | 78.5442  |          |
| Q9JLJ2    | 4-trimethylaminobutyraldehyde dehydrogenase OS=Mus musculus GN=Aldh9a1 PE=1 SV=1                                       | 3.846154 | 1        | 3   | 1  | 53.48  | 6.98   | 1900000  | 2000000  | 2000000  | 9.646425 |          |
| P26369    | Splicing factor U2AF 65 kDa subunit OS=Mus musculus GN=U2af2 PE=1 SV=3                                                 | 12.84211 | 5        | 15  | 5  | 53.483 | 9.09   | 6000000  | 5600000  | 5200000  | 36.70462 |          |
| Q8CD15    | Bifunctional lysine-specific demethylase and histidyl-hydroxylase MINA OS=Mus musculus GN=Mina PE=1 SV=2               | 6.236559 | 2        | 6   | 2  | 53.483 | 6.38   | 2300000  | 1900000  | 2100000  | 15.6424  |          |
| Q3TKY6    | Peptidyl-prolyl cis-trans isomerase CWC27 homolog OS=Mus musculus GN=Cwc27 PE=1 SV=1                                   | 8.955224 | 2        | 3   | 2  | 53.51  | 5.53   | 1100000  |          | 1700000  | 10.4561  |          |
| P21614    | Vitamin D-binding protein OS=Mus musculus GN=Gc PE=1 SV=2                                                              | 6.302521 | 2        | 4   | 2  | 53.565 | 5.5    | 1700000  | 1600000  | 1200000  | 9.728937 |          |
| Q9EPM5    | Syncoilin OS=Mus musculus GN=Sync PE=1 SV=1                                                                            | 2.12766  | 1        | 1   | 1  | 53.597 | 4.53   |          |          |          | 2.461499 |          |
| P20152    | Vimentin OS=Mus musculus GN=Vim PE=1 SV=3                                                                              | 79.82833 | 50       | 338 | 39 | 53.655 | 5.12   | 9.8E+08  | 9.6E+08  | 9E+08    | 1003.603 |          |
| P28658    | Ataxin-10 OS=Mus musculus GN=Atxn10 PE=1 SV=2                                                                          | 9.052632 | 4        | 7   | 4  | 53.673 | 5.25   | 1800000  | 2700000  | 1600000  | 19.80994 |          |
| REFSEQ:XP | Tax_Id=10090 Gene_Symbol=Krt33b keratin complex 1, acidic, gene 3                                                      | x        | 34.66387 | 17  | 45 | 3      | 53.694 | 5.29     | 2100000  | 3000000  | 4700000  | 120.4206 |
| Q64282    | Interferon-induced protein with tetratricopeptide repeats 1 OS=Mus musculus GN=Ifit1 PE=1 SV=2                         | 33.47732 | 14       | 40  | 14 | 53.703 | 7.52   | 29000000 | 27000000 | 26000000 | 130.3405 |          |
| Q64735    | Complement component receptor 1-like protein OS=Mus musculus GN=Cr1l PE=1 SV=1                                         | 2.277433 | 1        | 2   | 1  | 53.728 | 6.65   |          | 4600000  |          | 5.338518 |          |
| P13379    | T-cell surface glycoprotein CD5 OS=Mus musculus GN=Cd5 PE=1 SV=1                                                       | 2.42915  | 1        | 1   | 1  | 53.815 | 8.21   | 180000   |          |          | 1.840122 |          |
| Q8K124    | Pleckstrin homology domain-containing family O member 2 OS=Mus musculus GN=Plekho2 PE=1 SV=1                           | 7.272727 | 2        | 2   | 2  | 53.839 | 5.5    | 310000   |          |          | 4.97532  |          |
| Q8VDL4    | ADP-dependent glucokinase OS=Mus musculus GN=Adpgk PE=1 SV=2                                                           | 10.68548 | 3        | 5   | 3  | 53.869 | 5.62   | 990000   | 1200000  | 1700000  | 17.13618 |          |
| Q9WUM3    | Coronin-1B OS=Mus musculus GN=Coro1b PE=1 SV=1                                                                         | 18.38843 | 8        | 21  | 8  | 53.878 | 5.78   | 10000000 | 10000000 | 10000000 | 67.81333 |          |
| Q61655    | ATP-dependent RNA helicase DDX19A OS=Mus musculus GN=Ddx19a PE=1 SV=2                                                  | 3.138075 | 1        | 2   | 1  | 53.899 | 6.67   |          | 2900000  | 2500000  | 6.736555 |          |
| P47740    | Fatty aldehyde dehydrogenase OS=Mus musculus GN=Aldh3a2 PE=1 SV=2                                                      | 12.19008 | 5        | 11  | 5  | 53.936 | 8.35   | 3800000  | 3100000  | 3000000  | 30.88998 |          |
| P17809    | Solute carrier family 2, facilitated glucose transporter member 1 OS=Mus musculus GN=Slc2a1 PE=1 SV=4                  | 2.03252  | 1        | 3   | 1  | 53.949 | 8.87   | 2800000  | 3000000  | 3200000  | 7.903014 |          |
| Q8BKZ9    | Pyruvate dehydrogenase protein X component, mitochondrial OS=Mus musculus GN=Pdhx PE=1 SV=1                            | 7.58483  | 3        | 6   | 3  | 53.965 | 7.75   | 1400000  | 1600000  | 780000   | 18.18117 |          |
| O88947    | Coagulation factor X OS=Mus musculus GN=F10 PE=1 SV=1                                                                  | 2.286902 | 1        | 2   | 1  | 53.983 | 5.66   | 380000   | 430000   |          | 4.227038 |          |
| Q6NSQ7    | Protein LTV1 homolog OS=Mus musculus GN=Ltv1 PE=1 SV=2                                                                 | 2.553191 | 1        | 1   | 1  | 53.99  | 4.92   | 760000   |          |          | 2.637816 |          |
| O35114    | Lysosome membrane protein 2 OS=Mus musculus GN=Scarb2 PE=1 SV=3                                                        | 8.786611 | 3        | 7   | 3  | 54.009 | 5.1    | 1400000  | 1100000  | 1300000  | 17.12673 |          |
| Q8BH43    | Wiskott-Aldrich syndrome protein family member 2 OS=Mus musculus GN=Wasf2 PE=1 SV=1                                    | 8.450704 | 4        | 10  | 4  | 54.04  | 5.53   | 2700000  | 7500000  | 6700000  | 27.2411  |          |
| Q8R180    | ERO1-like protein alpha OS=Mus musculus GN=Ero1a PE=1 SV=2                                                             | 5.172414 | 2        | 4   | 2  | 54.05  | 6.54   | 2500000  | 3700000  |          | 13.87662 |          |
| P97379    | Ras GTPase-activating protein-binding protein 2 OS=Mus musculus GN=G3bp2 PE=1 SV=2                                     | 17.63485 | 6        | 15  | 6  | 54.055 | 5.62   | 4700000  | 3600000  | 3100000  | 43.25739 |          |
| Q4FZF3    | Probable ATP-dependent RNA helicase DDX49 OS=Mus musculus GN=Ddx49 PE=2 SV=1                                           | 2.708333 | 1        | 1   | 1  | 54.06  | 8.78   |          | 900000   |          | 2.783075 |          |
| P11798    | Calcium/calmodulin-dependent protein kinase type II subunit alpha OS=Mus musculus GN=Camk2a PE=1 SV=2                  | 30.33473 | 12       | 31  | 8  | 54.081 | 7.08   | 30000000 | 18000000 | 12000000 | 96.94721 |          |
| P54823    | Probable ATP-dependent RNA helicase DDX6 OS=Mus musculus GN=Ddx6 PE=1 SV=1                                             | 14.07867 | 5        | 12  | 5  | 54.157 | 8.66   | 1700000  | 3700000  | 3300000  | 32.77655 |          |
| P70315    | Wiskott-Aldrich syndrome protein homolog OS=Mus musculus GN=Was PE=1 SV=1                                              | 2.884615 | 1        | 3   | 1  | 54.158 | 6.7    | 1600000  | 1100000  | 1200000  | 9.463088 |          |
| Q2TPA8    | Hydroxysteroid dehydrogenase-like protein 2 OS=Mus musculus GN=Hsd12 PE=1 SV=1                                         | 2.244898 | 1        | 2   | 1  | 54.174 | 6.74   | 2100000  |          | 1400000  | 5.0633   |          |
| Q6PDL0    | Cytoplasmic dynein 1 light intermediate chain 2 OS=Mus musculus GN=Dync1li2 PE=1 SV=2                                  | 18.08943 | 6        | 15  | 5  | 54.185 | 6.28   | 3500000  | 2800000  | 2000000  | 40.61767 |          |
| P49710    | Hematopoietic lineage cell-specific protein OS=Mus musculus GN=Hcls1 PE=1 SV=2                                         | 16.25514 | 6        | 22  | 6  | 54.207 | 4.84   | 6000000  | 6900000  | 3200000  | 72.26649 |          |
| P15331    | Peripherin OS=Mus musculus GN=Prph PE=1 SV=2                                                                           | 27.57895 | 14       | 47  | 10 | 54.235 | 5.52   | 7900000  | 9000000  | 8600000  | 127.6689 |          |
| Q920H4    | CUGBP Elav-like family member 2 OS=Mus musculus GN=Celf2 PE=1 SV=1                                                     | 3.543307 | 1        | 4   | 1  | 54.236 | 8.76   | 1200000  | 1600000  | 670000   | 12.44571 |          |
| O08749    | Dihydropolypol dehydrogenase, mitochondrial OS=Mus musculus GN=Dld PE=1 SV=2                                           | 15.71709 | 8        | 14  | 8  | 54.238 | 7.9    | 8100000  | 6300000  | 6100000  | 39.1842  |          |
| Q91YD9    | Neural Wiskott-Aldrich syndrome protein OS=Mus musculus GN=Wasl PE=1 SV=1                                              | 5.788423 | 2        | 2   | 2  | 54.24  | 7.93   | 840000   |          |          | 4.893657 |          |
| Q9D2Y4    | Mixed lineage kinase domain-like protein OS=Mus musculus GN=Mkl1 PE=1 SV=1                                             | 14.61864 | 6        | 13  | 6  | 54.283 | 8.25   | 3500000  | 2400000  | 2900000  | 32.61688 |          |
| O55026    | Ectonucleoside triphosphate diphosphohydrolase 2 OS=Mus musculus GN=Entpd2 PE=1 SV=2                                   | 2.626263 | 1        | 1   | 1  | 54.285 | 8.37   | 580000   |          |          | 2.395683 |          |
| O88746    | Target of Myb protein 1 OS=Mus musculus GN=Tom1 PE=1 SV=1                                                              | 2.03252  | 1        | 1   | 1  | 54.291 | 4.94   |          |          |          | 1.800294 |          |
| Q8VCX5    | Calcium uptake protein 1, mitochondrial OS=Mus musculus GN=Micu1 PE=1 SV=1                                             | 2.725367 | 1        | 1   | 1  | 54.318 | 8.59   |          |          | 1200000  | 3.169581 |          |
| P97807    | Fumarate hydratase, mitochondrial OS=Mus musculus GN=Fh PE=1 SV=3                                                      | 5.128205 | 2        | 6   | 2  | 54.322 | 9.04   | 6400000  | 4600000  | 5100000  | 20.76997 |          |
| P32921    | Tryptophan-tRNA ligase, cytoplasmic OS=Mus musculus GN=Wars PE=1 SV=2                                                  | 22.86902 | 8        | 25  | 8  | 54.323 | 6.89   | 16000000 | 18000000 | 10000000 | 80.17342 |          |
| Q8BYU6    | Torsin-1A-interacting protein 2 OS=Mus musculus GN=Tor1aip2 PE=1 SV=1                                                  | 17.13147 | 5        | 9   | 5  | 54.463 | 4.86   | 2300000  | 2300000  | 1600000  | 27.92367 |          |
| Q61553    | Fascin OS=Mus musculus GN=Fscn1 PE=1 SV=4                                                                              | 5.070994 | 2        | 3   | 2  | 54.474 | 6.89   | 1600000  | 1100000  | 3000000  | 7.454178 |          |
| Q922H2    | Regulator of G-protein signaling 6 OS=Mus musculus GN=Rgs6 PE=1 SV=2                                                   | 2.542373 | 1        | 2   | 1  | 54.497 | 7.42   | 1500000  | 810000   |          | 5.904659 |          |
| Q99K48    | Non-POU domain-containing octamer-binding protein OS=Mus musculus GN=Nono PE=1 SV=3                                    | 44.18605 | 17       | 53  | 16 | 54.506 | 8.95   | 19000000 | 18000000 | 20000000 | 152.1404 |          |
| Q6IMF0    | Keratin, type II cuticular Hb3 OS=Mus musculus GN=Krt83 PE=2 SV=2                                                      | 46.06061 | 23       | 66  | 3  | 54.594 | 6.06   | 3500000  | 4900000  | 7500000  | 188.0773 |          |
| Q99M31    | Heat shock 70 kDa protein 14 OS=Mus musculus GN=Hspa14 PE=1 SV=2                                                       | 3.929273 | 2        | 3   | 2  | 54.616 | 5.92   | 1400000  | 1900000  | 2200000  | 7.97002  |          |
| Q61151    | Serine/threonine-protein phosphatase 2A 56 kDa regulatory subunit epsilon isoform OS=Mus musculus GN=Ppp2r5e PE=1 SV=2 | 2.783726 | 1        | 4   | 1  | 54.679 | 6.95   | 440000   | 1900000  | 1500000  | 10.07508 |          |
| O35892    | Nuclear autoantigen Sp-100 OS=Mus musculus GN=Sp100 PE=1 SV=2                                                          | 13.48548 | 5        | 11  | 5  | 54.692 | 8.66   | 5000000  | 6900000  | 6600000  | 33.17615 |          |
| Q80W54    | CAAX prenyl protease 1 homolog OS=Mus musculus GN=Zmpste24 PE=1 SV=2                                                   | 6.736842 | 3        | 7   | 3  | 54.699 | 6.95   | 3200000  | 3900000  | 4900000  | 22.89551 |          |

|          |                                                                                                                      |   |          |    |     |    |        |      |          |          |          |          |
|----------|----------------------------------------------------------------------------------------------------------------------|---|----------|----|-----|----|--------|------|----------|----------|----------|----------|
| Q8K0E8   | Fibrinogen beta chain OS=Mus musculus GN=Fgb PE=1 SV=1                                                               |   | 38.25364 | 16 | 40  | 16 | 54.718 | 7.08 | 17000000 | 18000000 | 15000000 | 118.2919 |
| P56183   | Ribosomal RNA processing protein 1 homolog A OS=Mus musculus GN=Rrp1 PE=1 SV=2                                       |   | 7.692308 | 3  | 6   | 3  | 54.743 | 5.17 | 780000   | 1500000  | 1400000  | 18.76981 |
| Q3UHL1   | CaM kinase-like vesicle-associated protein OS=Mus musculus GN=Camkv PE=1 SV=2                                        |   | 29.10156 | 7  | 17  | 7  | 54.785 | 5.54 | 4600000  | 1500000  | 1500000  | 60.44136 |
| O70475   | UDP-glucose 6-dehydrogenase OS=Mus musculus GN=Ugdh PE=1 SV=1                                                        |   | 25.35497 | 10 | 24  | 10 | 54.797 | 7.56 | 11000000 | 12000000 | 8900000  | 68.55003 |
| P29788   | Vitronectin OS=Mus musculus GN=Vtn PE=1 SV=2                                                                         |   | 3.974895 | 2  | 2   | 2  | 54.814 | 5.88 | 5600000  | 1300000  |          | 4.191104 |
| P54822   | Adenylosuccinate lyase OS=Mus musculus GN=Adsl PE=1 SV=2                                                             |   | 6.404959 | 3  | 6   | 3  | 54.831 | 7.27 | 1500000  | 1400000  | 440000   | 15.41293 |
| Q8VEH8   | Endoplasmic reticulum lectin 1 OS=Mus musculus GN=Erlec1 PE=1 SV=1                                                   |   | 6.832298 | 3  | 6   | 3  | 54.871 | 6.25 | 3700000  | 2100000  | 2000000  | 15.8511  |
| P28661   | Septin-4 OS=Mus musculus GN=Sept4 PE=1 SV=1                                                                          |   | 4.393305 | 1  | 1   | 1  | 54.901 | 5.87 | 150000   |          |          | 2.524114 |
| Q8C0J6   | Ankyrin repeat domain-containing protein SOWAHC OS=Mus musculus GN=Sowahc PE=1 SV=2                                  |   | 3.320313 | 1  | 3   | 1  | 54.905 | 6    | 1800000  | 1300000  | 1200000  | 10.66027 |
| Q9CWN7   | CCR4-NOT transcription complex subunit 11 OS=Mus musculus GN=Cnot11 PE=1 SV=1                                        |   | 3.366337 | 1  | 1   | 1  | 54.924 | 6.55 | 250000   |          |          | 2.359242 |
| Q9Z1X2   | Phosphatidylserine synthase 2 OS=Mus musculus GN=Ptdss2 PE=1 SV=2                                                    |   | 2.748414 | 1  | 1   | 1  | 54.985 | 7.09 |          | 670000   |          | 1.981493 |
| Q64112   | Interferon-induced protein with tetratricopeptide repeats 2 OS=Mus musculus GN=Ifit2 PE=1 SV=1                       |   | 7.415254 | 4  | 12  | 4  | 54.986 | 7.43 | 7000000  | 6400000  | 5300000  | 33.97546 |
| Q8CBE3   | WD repeat-containing protein 37 OS=Mus musculus GN=Wdr37 PE=1 SV=1                                                   |   | 2.016129 | 1  | 1   | 1  | 55.012 | 7.23 | 1700000  |          |          | 1.940831 |
| O09106   | Histone deacetylase 1 OS=Mus musculus GN=Hdac1 PE=1 SV=1                                                             |   | 8.091286 | 3  | 7   | 2  | 55.04  | 5.48 | 2000000  | 750000   |          | 19.03672 |
| Q80YV2   | Nuclear-interacting partner of ALK OS=Mus musculus GN=Zc3hc1 PE=1 SV=1                                               |   | 5.988024 | 2  | 4   | 2  | 55.161 | 5.38 | 310000   | 230000   | 650000   | 10.03336 |
| Q8VHI6   | Wiskott-Aldrich syndrome protein family member 3 OS=Mus musculus GN=Wasf3 PE=1 SV=1                                  |   | 2.39521  | 1  | 2   | 1  | 55.17  | 6.37 | 1100000  | 790000   |          | 4.519866 |
| Q99KP6   | Pre-mRNA-processing factor 19 OS=Mus musculus GN=Prpf19 PE=1 SV=1                                                    |   | 13.09524 | 5  | 19  | 5  | 55.204 | 6.61 | 11000000 | 12000000 | 13000000 | 58.9073  |
| Q99LF4   | tRNA-splicing ligase RtcB homolog OS=Mus musculus GN=Rtcb PE=1 SV=1                                                  |   | 20.79208 | 9  | 27  | 9  | 55.214 | 7.23 | 18000000 | 16000000 | 15000000 | 74.87379 |
| Q8C522   | Endonuclease domain-containing 1 protein OS=Mus musculus GN=Endod1 PE=1 SV=2                                         |   | 2.59481  | 1  | 3   | 1  | 55.227 | 6.16 | 5400000  | 4100000  | 4000000  | 10.02079 |
| Q3TZM9   | GDP-Man:Man(3)GlcNAc(2)-PP-Dol alpha-1,2-mannosyltransferase OS=Mus musculus GN=Alg11 PE=2 SV=1                      |   | 2.845528 | 1  | 1   | 1  | 55.234 | 8.29 |          |          |          | 3.317605 |
| P50096   | Inosine-5'-monophosphate dehydrogenase 1 OS=Mus musculus GN=Impdh1 PE=1 SV=2                                         |   | 3.891051 | 2  | 3   | 1  | 55.243 | 6.8  | 1100000  | 990000   |          | 7.779828 |
| P70288   | Histone deacetylase 2 OS=Mus musculus GN=Hdac2 PE=1 SV=1                                                             |   | 6.352459 | 2  | 4   | 1  | 55.267 | 5.91 | 720000   |          |          | 11.47096 |
| P46660   | Alpha-internexin OS=Mus musculus GN=Ina PE=1 SV=3                                                                    |   | 34.13174 | 17 | 48  | 14 | 55.349 | 5.4  | 19000000 | 7700000  | 8600000  | 140.3899 |
| Q8CCF0   | U4/U6 small nuclear ribonucleoprotein Prp31 OS=Mus musculus GN=Prpf31 PE=1 SV=3                                      |   | 7.214429 | 3  | 6   | 3  | 55.395 | 5.67 | 1500000  | 1700000  | 1800000  | 16.10511 |
| Q99KQ4   | Nicotinamide phosphoribosyltransferase OS=Mus musculus GN=Nampt PE=1 SV=1                                            |   | 14.66395 | 6  | 15  | 6  | 55.413 | 7.15 | 8100000  | 7400000  | 6200000  | 47.23067 |
| Q5SRX1   | TOM1-like protein 2 OS=Mus musculus GN=Tom1l2 PE=1 SV=1                                                              |   | 2.95858  | 1  | 2   | 1  | 55.628 | 4.82 | 5200000  |          | 3500000  | 6.708646 |
| P14576   | Signal recognition particle 54 kDa protein OS=Mus musculus GN=Srp54 PE=1 SV=2                                        |   | 9.722222 | 4  | 9   | 4  | 55.684 | 8.75 | 4100000  | 6100000  | 2600000  | 27.41374 |
| Q8BTS4   | Nuclear pore complex protein Nup54 OS=Mus musculus GN=Nup54 PE=1 SV=1                                                |   | 2.54902  | 1  | 2   | 1  | 55.697 | 7.02 | 1000000  | 780000   |          | 5.798808 |
| Q9Z2T6   | Keratin, type II cuticular Hb5 OS=Mus musculus GN=Krt85 PE=1 SV=2                                                    |   | 30.17751 | 17 | 45  | 2  | 55.723 | 6.42 | 1700000  |          | 1900000  | 115.6729 |
| P24547   | Inosine-5'-monophosphate dehydrogenase 2 OS=Mus musculus GN=Impdh2 PE=1 SV=2                                         |   | 20.03891 | 9  | 14  | 8  | 55.78  | 7.28 | 6400000  | 3600000  | 6000000  | 38.90067 |
| Q9WVE8   | Protein kinase C and casein kinase substrate in neurons protein 2 OS=Mus musculus GN=Pacsin2 PE=1 SV=1               |   | 12.96296 | 6  | 13  | 6  | 55.798 | 5.2  | 12000000 | 9700000  | 13000000 | 35.83673 |
| Q9D8M7   | PHD finger protein 10 OS=Mus musculus GN=Phf10 PE=1 SV=4                                                             |   | 2.012072 | 1  | 2   | 1  | 55.804 | 6.61 |          |          |          | 4.95348  |
| Q9D024   | Coiled-coil domain-containing protein 47 OS=Mus musculus GN=Ccdc47 PE=1 SV=2                                         |   | 15.52795 | 6  | 13  | 6  | 55.808 | 4.84 | 3100000  | 3900000  | 4300000  | 36.79371 |
| Q8BVE3   | V-type proton ATPase subunit H OS=Mus musculus GN=Atp6v1h PE=1 SV=1                                                  |   | 17.80538 | 6  | 14  | 6  | 55.819 | 6.61 | 5400000  | 5700000  | 4900000  | 45.58037 |
| Q9Z127   | Large neutral amino acids transporter small subunit 1 OS=Mus musculus GN=Slc7a5 PE=1 SV=2                            |   | 8.398438 | 3  | 8   | 3  | 55.836 | 7.9  | 4700000  | 5300000  | 4400000  | 29.79941 |
| Q14CN4-1 | SWISS-PROT:Q14CN4-1 Tax_Id=9606 Gene_Symbol=KRT72 Isoform 1 of Keratin, type II cytoskeletal 72                      | x | 7.436399 | 4  | 13  | 1  | 55.842 | 6.89 |          |          | 5500000  | 36.09409 |
| Q99PP6   | Tripartite motif-containing protein 34A OS=Mus musculus GN=Trim34a PE=2 SV=2                                         |   | 2.061856 | 1  | 2   | 1  | 55.872 | 8.09 | 2600000  | 2400000  |          | 4.781641 |
| Q8BWF0   | Succinate-semialdehyde dehydrogenase, mitochondrial OS=Mus musculus GN=Aldh5a1 PE=1 SV=1                             |   | 10.51625 | 4  | 11  | 4  | 55.933 | 8.25 | 4500000  | 2700000  | 3100000  | 35.65258 |
| Q8BJY1   | 26S proteasome non-ATPase regulatory subunit 5 OS=Mus musculus GN=Psm5 PE=1 SV=4                                     |   | 1.388889 | 1  | 1   | 1  | 55.937 | 5.21 | 1200000  |          |          | 2.180315 |
| Q8VE97   | Serine/arginine-rich splicing factor 4 OS=Mus musculus GN=Srsf4 PE=2 SV=1                                            |   | 12.47444 | 6  | 20  | 3  | 55.947 | 11.4 | 2200000  | 6600000  | 5700000  | 54.67149 |
| Q8BK67   | Protein RCC2 OS=Mus musculus GN=Rcc2 PE=1 SV=1                                                                       |   | 20       | 8  | 20  | 8  | 55.948 | 8.72 | 6900000  | 8300000  | 6900000  | 59.10978 |
| Q9D0K2   | Succinyl-CoA:3-ketoacid coenzyme A transferase 1, mitochondrial OS=Mus musculus GN=Oxct1 PE=1 SV=1                   |   | 13.07692 | 6  | 12  | 6  | 55.953 | 8.53 | 7200000  | 5700000  | 5400000  | 28.00671 |
| P24529   | Tyrosine 3-monooxygenase OS=Mus musculus GN=Th PE=1 SV=3                                                             |   | 3.012048 | 1  | 1   | 1  | 55.958 | 6.15 |          | 670000   |          | 2.210867 |
| Q9JMA1   | Ubiquitin carboxyl-terminal hydrolase 14 OS=Mus musculus GN=Usp14 PE=1 SV=3                                          |   | 15.01014 | 5  | 10  | 5  | 55.966 | 5.24 | 3200000  | 4000000  | 2800000  | 28.4965  |
| O35874   | Neutral amino acid transporter A OS=Mus musculus GN=Slc1a4 PE=1 SV=1                                                 |   | 10.71429 | 3  | 9   | 2  | 56.026 | 5.87 | 4200000  | 3000000  | 2900000  | 31.80684 |
| Q9CPY7   | Cytosol aminopeptidase OS=Mus musculus GN=Lap3 PE=1 SV=3                                                             |   | 18.88247 | 8  | 22  | 8  | 56.106 | 7.72 | 6500000  | 7400000  | 4200000  | 64.53678 |
| P56480   | ATP synthase subunit beta, mitochondrial OS=Mus musculus GN=Atp5b PE=1 SV=2                                          |   | 41.96597 | 19 | 109 | 19 | 56.265 | 5.34 | 93000000 | 71000000 | 66000000 | 345.4039 |
| Q6PD03   | Serine/threonine-protein phosphatase 2A 56 kDa regulatory subunit alpha isoform OS=Mus musculus GN=Ppp2r5a PE=1 SV=1 |   | 4.938272 | 2  | 2   | 2  | 56.311 | 7.03 |          | 1000000  |          | 5.396792 |
| Q6PHZ2   | Calcium/calmodulin-dependent protein kinase type II subunit delta OS=Mus musculus GN=Camk2d PE=1 SV=1                |   | 21.84369 | 9  | 21  | 5  | 56.334 | 7.25 | 7500000  |          | 5100000  | 68.00638 |
| Q3UYC0   | Protein phosphatase 1H OS=Mus musculus GN=Ppm1h PE=1 SV=1                                                            |   | 1.754386 | 1  | 1   | 1  | 56.345 | 6.73 | 910000   |          |          | 2.495507 |
| P97360   | Transcription factor ETV6 OS=Mus musculus GN=Etv6 PE=1 SV=1                                                          |   | 1.649485 | 1  | 3   | 1  | 56.37  | 7.33 | 1800000  | 1600000  | 2000000  | 7.048251 |
| P97797   | Tyrosine-protein phosphatase non-receptor type substrate 1 OS=Mus musculus GN=Sirpa PE=1 SV=1                        |   | 3.898635 | 2  | 4   | 2  | 56.39  | 8.15 | 980000   | 830000   | 520000   | 8.874052 |
| P61922   | 4-aminobutyrate aminotransferase, mitochondrial OS=Mus musculus GN=Abat PE=1 SV=1                                    |   | 7.6      | 3  | 10  | 3  | 56.416 | 8.09 | 4500000  | 3300000  | 4400000  | 30.23283 |

|          |                                                                                                 |   |          |    |     |    |        |       |          |          |          |          |
|----------|-------------------------------------------------------------------------------------------------|---|----------|----|-----|----|--------|-------|----------|----------|----------|----------|
| Q8VCH8   | UBX domain-containing protein 4 OS=Mus musculus GN=Ubxn4 PE=1 SV=1                              |   | 1.383399 | 1  | 3   | 1  | 56.437 | 6.61  | 1600000  | 1500000  | 1100000  | 6.867962 |
| Q9QYI3   | Dnal homolog subfamily C member 7 OS=Mus musculus GN=Dnajc7 PE=1 SV=2                           |   | 13.76518 | 6  | 13  | 6  | 56.44  | 6.49  | 4200000  | 4000000  | 4000000  | 37.12646 |
| P17225   | Polypyrimidine tract-binding protein 1 OS=Mus musculus GN=Ptbp1 PE=1 SV=2                       |   | 7.779886 | 3  | 8   | 2  | 56.443 | 8.34  | 7100000  | 5900000  | 5300000  | 24.13691 |
| Q9CQF9   | Prenylcysteine oxidase OS=Mus musculus GN=Pcyox1 PE=1 SV=1                                      |   | 8.514851 | 3  | 9   | 3  | 56.459 | 6.92  | 1900000  | 2000000  | 2100000  | 28.16345 |
| P47738   | Aldehyde dehydrogenase, mitochondrial OS=Mus musculus GN=Aldh2 PE=1 SV=1                        |   | 15.60694 | 6  | 15  | 6  | 56.502 | 7.62  | 4300000  | 2300000  | 4700000  | 44.09972 |
| P62814   | V-type proton ATPase subunit B, brain isoform OS=Mus musculus GN=Atp6v1b2 PE=1 SV=1             |   | 24.46184 | 12 | 32  | 12 | 56.515 | 5.81  | 20000000 | 13000000 | 13000000 | 88.62255 |
| Q61753   | D-3-phosphoglycerate dehydrogenase OS=Mus musculus GN=Phgdh PE=1 SV=3                           |   | 7.129456 | 3  | 9   | 3  | 56.549 | 6.54  | 6000000  | 6300000  | 4600000  | 28.51374 |
| Q99K28   | ADP-ribosylation factor GTPase-activating protein 2 OS=Mus musculus GN=Arfgap2 PE=1 SV=1        |   | 8.653846 | 4  | 8   | 4  | 56.563 | 8.18  | 1800000  | 1800000  | 1100000  | 21.39395 |
| Q5XG73   | Acyl-CoA-binding domain-containing protein 5 OS=Mus musculus GN=Acbd5 PE=1 SV=1                 |   | 2.165354 | 1  | 1   | 1  | 56.578 | 5.41  |          |          |          | 2.383377 |
| Q8R1Q8   | Cytoplasmic dynein 1 light intermediate chain 1 OS=Mus musculus GN=Dync1li1 PE=1 SV=1           |   | 18.73805 | 7  | 15  | 6  | 56.579 | 6.42  | 3400000  | 5100000  | 2900000  | 44.08744 |
| Q8BGQ1   | Spermatogenesis-defective protein 39 homolog OS=Mus musculus GN=Vipas39 PE=1 SV=1               |   | 3.05499  | 1  | 3   | 1  | 56.59  | 7.17  | 1100000  | 900000   | 1100000  | 8.736958 |
| P27773   | Protein disulfide-isomerase A3 OS=Mus musculus GN=Pdia3 PE=1 SV=2                               |   | 60       | 29 | 135 | 29 | 56.643 | 6.21  | 1.5E+08  | 1.4E+08  | 1.5E+08  | 413.6389 |
| Q8BHD7   | Polypyrimidine tract-binding protein 3 OS=Mus musculus GN=Ptbp3 PE=1 SV=1                       |   | 3.632887 | 2  | 4   | 1  | 56.665 | 9.13  |          | 2700000  | 4200000  | 10.45398 |
| Q8BZX4   | Splicing regulatory glutamine/lysine-rich protein 1 OS=Mus musculus GN=Srek1 PE=2 SV=1          |   | 8.704453 | 3  | 6   | 3  | 56.73  | 10.48 | 2500000  | 1300000  | 1300000  | 20.93002 |
| Q8K0C4   | Lanosterol 14-alpha demethylase OS=Mus musculus GN=Cyp51a1 PE=1 SV=1                            |   | 2.385686 | 1  | 1   | 1  | 56.739 | 8.41  |          |          | 810000   | 2.065296 |
| O35841   | Apoptosis inhibitor 5 OS=Mus musculus GN=Api5 PE=1 SV=2                                         |   | 9.722222 | 4  | 9   | 4  | 56.75  | 5.92  | 6700000  | 5600000  | 4200000  | 25.50858 |
| Q9Z2A7   | Diacylglycerol O-acyltransferase 1 OS=Mus musculus GN=Dgat1 PE=1 SV=1                           |   | 5.02008  | 1  | 1   | 1  | 56.753 | 9.39  | 2000000  |          |          | 4.48274  |
| Q9QXE7   | F-box-like/WD repeat-containing protein TBL1X OS=Mus musculus GN=Tbl1x PE=1 SV=2                |   | 10.81594 | 4  | 7   | 4  | 56.767 | 5.72  | 2100000  | 2000000  | 1200000  | 20.48891 |
| Q9J1U0   | Serine/threonine-protein kinase 3 OS=Mus musculus GN=Stk3 PE=1 SV=1                             |   | 2.012072 | 1  | 1   | 1  | 56.819 | 4.98  |          | 630000   |          | 1.799347 |
| Q9JM13   | Rab5 GDP/GTP exchange factor OS=Mus musculus GN=Rabgef1 PE=1 SV=1                               |   | 2.240326 | 1  | 2   | 1  | 56.833 | 6.79  | 520000   | 680000   |          | 4.606768 |
| Q9D2E2   | Target of EGR1 protein 1 OS=Mus musculus GN=Toe1 PE=1 SV=1                                      |   | 2.348337 | 1  | 1   | 1  | 56.835 | 6.64  | 480000   |          |          | 2.708559 |
| Q60676   | Serine/threonine-protein phosphatase 5 OS=Mus musculus GN=Ppp5c PE=1 SV=3                       |   | 5.410822 | 2  | 3   | 2  | 56.84  | 6.2   |          | 1200000  | 1600000  | 7.392565 |
| O70310   | Glycylpeptide N-tetradecanoyltransferase 1 OS=Mus musculus GN=Nmt1 PE=1 SV=1                    |   | 6.854839 | 3  | 10  | 3  | 56.852 | 8     | 3600000  | 3300000  | 2800000  | 30.21638 |
| Q922V4   | Pleiotropic regulator 1 OS=Mus musculus GN=Plrg1 PE=1 SV=1                                      |   | 2.339181 | 1  | 2   | 1  | 56.902 | 9.17  | 1300000  |          | 330000   | 4.931069 |
| Q8N1N4-2 | SWISS-PROT:Q8N1N4-2 Tax_Id=9606 Gene_Symbol=KRT78 Isoform 2 of Keratin, type II cytoskeletal 78 | x | 19.00192 | 10 | 20  | 6  | 56.93  | 6.02  | 1600000  |          | 4900000  | 52.74564 |
| Q8CIM7   | Cytochrome P450 2D26 OS=Mus musculus GN=Cyp2d26 PE=1 SV=1                                       |   | 2.4      | 1  | 1   | 1  | 56.939 | 6.64  | 370000   |          |          | 2.77735  |
| Q61790   | Lymphocyte activation gene 3 protein OS=Mus musculus GN=Lag3 PE=2 SV=1                          |   | 2.111324 | 1  | 1   | 1  | 56.942 | 8.25  | 430000   |          |          | 2.247377 |
| Q91ZJ5   | UTP--glucose-1-phosphate uridylyltransferase OS=Mus musculus GN=Ugp2 PE=1 SV=3                  |   | 4.724409 | 2  | 3   | 2  | 56.944 | 7.61  | 3900000  | 2400000  |          | 6.339203 |
| Q99LM2   | CDK5 regulatory subunit-associated protein 3 OS=Mus musculus GN=Cdk5rap3 PE=1 SV=1              |   | 1.988072 | 1  | 1   | 1  | 56.955 | 4.83  |          | 970000   |          | 2.85131  |
| Q9ERA0   | Alpha-globin transcription factor CP2 OS=Mus musculus GN=Tfcp2 PE=1 SV=1                        |   | 2.390438 | 1  | 3   | 1  | 56.996 | 5.54  | 160000   | 230000   | 400000   | 8.750796 |
| P09103   | Protein disulfide-isomerase OS=Mus musculus GN=P4hb PE=1 SV=2                                   |   | 38.70334 | 17 | 49  | 17 | 57.023 | 4.88  | 36000000 | 35000000 | 31000000 | 158.6982 |
| Q6NVG1   | Lysophospholipid acyltransferase LPCAT4 OS=Mus musculus GN=Lpcat4 PE=1 SV=1                     |   | 3.053435 | 1  | 1   | 1  | 57.107 | 8.75  |          | 360000   |          | 2.816766 |
| Q922B2   | Aspartate--tRNA ligase, cytoplasmic OS=Mus musculus GN=Dars PE=1 SV=2                           |   | 37.72455 | 16 | 41  | 16 | 57.111 | 6.49  | 9100000  | 8100000  | 12000000 | 115.2811 |
| P55772   | Ectonucleoside triphosphate diphosphohydrolase 1 OS=Mus musculus GN=Entpd1 PE=1 SV=1            |   | 6.078431 | 3  | 10  | 3  | 57.169 | 5.86  | 5200000  | 2700000  | 3100000  | 22.07209 |
| Q5XJY5   | Coatamer subunit delta OS=Mus musculus GN=Arcn1 PE=1 SV=2                                       |   | 22.70059 | 11 | 33  | 11 | 57.193 | 6.21  | 5500000  | 9300000  | 6700000  | 87.56384 |
| Q9CXG3   | Peptidyl-prolyl cis-trans isomerase-like 4 OS=Mus musculus GN=Ppil4 PE=1 SV=2                   |   | 2.642276 | 1  | 3   | 1  | 57.195 | 6.11  | 2500000  | 2400000  | 2600000  | 8.498278 |
| Q3THK3   | General transcription factor IIF subunit 1 OS=Mus musculus GN=Gtf2f1 PE=1 SV=2                  |   | 11.61417 | 4  | 10  | 4  | 57.206 | 7.01  | 3200000  | 3300000  | 2700000  | 32.38661 |
| P15533   | Tripartite motif-containing protein 30A OS=Mus musculus GN=Trim30a PE=1 SV=2                    |   | 2.419355 | 1  | 3   | 1  | 57.293 | 6.98  | 1100000  | 990000   | 980000   | 7.195528 |
| Q03267   | DNA-binding protein Ikaros OS=Mus musculus GN=Ikzf1 PE=1 SV=2                                   |   | 6.382979 | 3  | 3   | 2  | 57.299 | 6.52  | 1100000  | 350000   |          | 6.929445 |
| Q35633   | Vesicular inhibitory amino acid transporter OS=Mus musculus GN=Slc32a1 PE=1 SV=3                |   | 4.380952 | 1  | 2   | 1  | 57.344 | 6.64  | 740000   |          | 360000   | 7.592052 |
| Q9ESX5   | H/ACA ribonucleoprotein complex subunit 4 OS=Mus musculus GN=Dkc1 PE=1 SV=4                     |   | 13.35953 | 6  | 17  | 6  | 57.365 | 9.28  | 7400000  | 7800000  | 7100000  | 51.09983 |
| Q61035   | Histidine--tRNA ligase, cytoplasmic OS=Mus musculus GN=Hars PE=1 SV=2                           |   | 10.21611 | 5  | 12  | 5  | 57.396 | 6     | 3100000  | 2700000  | 1800000  | 29.22297 |
| Q91YW3   | Dnal homolog subfamily C member 3 OS=Mus musculus GN=Dnajc3 PE=1 SV=1                           |   | 10.31746 | 3  | 5   | 3  | 57.428 | 5.85  | 1100000  | 590000   | 1800000  | 16.55539 |
| P80314   | T-complex protein 1 subunit beta OS=Mus musculus GN=Cct2 PE=1 SV=4                              |   | 30.46729 | 13 | 35  | 13 | 57.441 | 6.4   | 15000000 | 13000000 | 11000000 | 111.747  |
| Q6DVA0   | LEM domain-containing protein 2 OS=Mus musculus GN=Lemd2 PE=1 SV=1                              |   | 3.32681  | 1  | 3   | 1  | 57.471 | 9.01  | 670000   | 580000   | 620000   | 8.529951 |
| P09242   | Alkaline phosphatase, tissue-nonspecific isozyme OS=Mus musculus GN=Alpl PE=1 SV=2              |   | 1.908397 | 1  | 1   | 1  | 57.478 | 7.01  | 530000   |          |          | 2.062876 |
| Q9WUB0   | RanBP-type and C3HC4-type zinc finger-containing protein 1 OS=Mus musculus GN=Rbck1 PE=1 SV=2   |   | 2.362205 | 1  | 1   | 1  | 57.497 | 6.19  |          | 550000   |          | 2.67461  |
| Q3UKJ7   | WD40 repeat-containing protein SMU1 OS=Mus musculus GN=Smu1 PE=2 SV=2                           |   | 4.483431 | 2  | 2   | 2  | 57.507 | 7.18  | 340000   | 3600000  |          | 5.523892 |
| Q8COC7   | Phenylalanine--tRNA ligase alpha subunit OS=Mus musculus GN=Farsa PE=1 SV=1                     |   | 9.448819 | 4  | 11  | 4  | 57.563 | 8.28  | 4100000  | 4200000  | 3900000  | 34.20204 |
| Q61749   | Translation initiation factor eIF-2B subunit delta OS=Mus musculus GN=Eif2b4 PE=1 SV=2          |   | 3.816794 | 1  | 2   | 1  | 57.588 | 9.25  | 510000   |          | 590000   | 4.958858 |
| P00687   | Alpha-amylase 1 OS=Mus musculus GN=Amy1 PE=1 SV=2                                               | x | 2.348337 | 1  | 1   | 1  | 57.607 | 6.96  |          |          | 3400000  | 2.587677 |
| Q3U7U3   | F-box only protein 7 OS=Mus musculus GN=Fbxo7 PE=1 SV=2                                         |   | 7.456979 | 2  | 4   | 2  | 57.613 | 5.83  | 950000   | 700000   | 600000   | 12.21275 |
| Q9XCX9   | ETS translocation variant 5 OS=Mus musculus GN=Etv5 PE=2 SV=1                                   |   | 5.882353 | 1  | 1   | 1  | 57.675 | 5.63  | 3300000  |          |          | 2.353956 |

|        |                                                                                                                         |   |          |    |    |    |        |      |          |          |          |          |
|--------|-------------------------------------------------------------------------------------------------------------------------|---|----------|----|----|----|--------|------|----------|----------|----------|----------|
| O35344 | Importin subunit alpha-4 OS=Mus musculus GN=Kpna3 PE=1 SV=1                                                             |   | 7.677543 | 3  | 7  | 2  | 57.737 | 4.94 | 2800000  | 2800000  | 1600000  | 20.50366 |
| Q9D0F3 | Protein ERGIC-53 OS=Mus musculus GN=Lman1 PE=1 SV=1                                                                     |   | 20.88975 | 6  | 14 | 6  | 57.753 | 6.34 | 12000000 | 5500000  | 5600000  | 42.20599 |
| Q5XKE5 | SWISS-PROT:Q5XKE5 Tax_Id=9606 Gene_Symbol=KRT79 Keratin, type II cytoskeletal 79                                        | x | 10.46729 | 8  | 25 | 1  | 57.774 | 7.2  |          |          | 1300000  | 60.04013 |
| P52480 | Pyruvate kinase PKM OS=Mus musculus GN=Pkm PE=1 SV=4                                                                    |   | 52.16573 | 22 | 92 | 22 | 57.808 | 7.47 | 1.5E+08  | 1.4E+08  | 1.2E+08  | 330.3075 |
| Q9EQ20 | Methylmalonate-semialdehyde dehydrogenase [acylating], mitochondrial OS=Mus musculus GN=Aldh6a1 PE=1 SV=1               |   | 3.738318 | 1  | 3  | 1  | 57.879 | 8.07 | 1400000  | 960000   | 370000   | 9.521549 |
| O35343 | Importin subunit alpha-3 OS=Mus musculus GN=Kpna4 PE=1 SV=1                                                             |   | 9.40499  | 4  | 9  | 3  | 57.887 | 4.94 | 1400000  | 1500000  | 1300000  | 21.33425 |
| P52293 | Importin subunit alpha-1 OS=Mus musculus GN=Kpna2 PE=1 SV=2                                                             |   | 8.506616 | 3  | 8  | 3  | 57.892 | 5.68 | 2400000  | 2700000  | 1800000  | 25.971   |
| Q8CIN4 | Serine/threonine-protein kinase PAK 2 OS=Mus musculus GN=Pak2 PE=1 SV=1                                                 |   | 8.969466 | 3  | 6  | 1  | 57.894 | 5.77 | 1000000  | 1200000  | 740000   | 15.79273 |
| P06240 | Proto-oncogene tyrosine-protein kinase LCK OS=Mus musculus GN=Lck PE=1 SV=4                                             |   | 5.89391  | 3  | 7  | 1  | 57.906 | 5.25 |          |          | 460000   | 16.81393 |
| O08900 | Zinc finger protein Aiolos OS=Mus musculus GN=Ikzf3 PE=1 SV=2                                                           |   | 4.733728 | 2  | 2  | 1  | 57.93  | 6.33 |          |          |          | 4.254487 |
| Q9JHP7 | KDEL motif-containing protein 1 OS=Mus musculus GN=Kdelc1 PE=1 SV=1                                                     |   | 7.569721 | 3  | 4  | 3  | 57.948 | 7.9  | 1700000  | 660000   | 2900000  | 10.78775 |
| P80317 | T-complex protein 1 subunit zeta OS=Mus musculus GN=Cct6a PE=1 SV=3                                                     |   | 19.96234 | 10 | 31 | 10 | 57.968 | 7.08 | 19000000 | 15000000 | 18000000 | 89.33209 |
| P80315 | T-complex protein 1 subunit delta OS=Mus musculus GN=Cct4 PE=1 SV=3                                                     |   | 23.37662 | 11 | 33 | 11 | 58.03  | 8.02 | 12000000 | 9000000  | 10000000 | 91.10856 |
| Q9DC61 | Mitochondrial-processing peptidase subunit alpha OS=Mus musculus GN=Pmpca PE=1 SV=1                                     |   | 3.625954 | 1  | 2  | 1  | 58.242 | 6.83 | 460000   |          | 410000   | 5.728467 |
| Q03963 | Interferon-induced, double-stranded RNA-activated protein kinase OS=Mus musculus GN=Eif2ak2 PE=1 SV=2                   |   | 8.737864 | 4  | 8  | 4  | 58.243 | 8.57 | 4300000  | 3900000  | 3900000  | 26.08643 |
| P10852 | 4F2 cell-surface antigen heavy chain OS=Mus musculus GN=Slc3a2 PE=1 SV=1                                                |   | 23.95437 | 11 | 34 | 11 | 58.3   | 5.91 | 19000000 | 19000000 | 18000000 | 96.93368 |
| Q9DAW6 | U4/U6 small nuclear ribonucleoprotein Prp4 OS=Mus musculus GN=Prpf4 PE=1 SV=1                                           |   | 5.182342 | 2  | 6  | 2  | 58.333 | 7.28 | 3200000  | 2900000  | 3000000  | 20.61656 |
| P26638 | Serine--tRNA ligase, cytoplasmic OS=Mus musculus GN=Sars PE=1 SV=3                                                      |   | 6.054688 | 2  | 5  | 2  | 58.352 | 6.3  | 4100000  | 4700000  | 3700000  | 16.36642 |
| Q99MN9 | Propionyl-CoA carboxylase beta chain, mitochondrial OS=Mus musculus GN=Pccb PE=1 SV=2                                   |   | 5.360444 | 2  | 6  | 2  | 58.372 | 7.66 | 2200000  | 1900000  | 1700000  | 19.54549 |
| P33610 | DNA primase large subunit OS=Mus musculus GN=Prim2 PE=1 SV=1                                                            |   | 2.376238 | 1  | 2  | 1  | 58.372 | 8.32 | 880000   | 850000   |          | 5.37997  |
| Q9CWX8 | Sorting nexin-2 OS=Mus musculus GN=Snx2 PE=1 SV=2                                                                       |   | 26.39692 | 12 | 21 | 10 | 58.435 | 5.12 | 5500000  | 4100000  | 4300000  | 56.96512 |
| P51912 | Neutral amino acid transporter B(0) OS=Mus musculus GN=Slc1a5 PE=1 SV=2                                                 |   | 4.882459 | 2  | 4  | 2  | 58.445 | 7.84 | 1300000  | 1500000  | 1700000  | 14.70304 |
| Q99J23 | GH3 domain-containing protein OS=Mus musculus GN=Ghdc PE=2 SV=2                                                         |   | 3.383459 | 1  | 1  | 1  | 58.471 | 7.56 |          |          | 350000   | 2.317839 |
| P31266 | Recombining binding protein suppressor of hairless OS=Mus musculus GN=Rbpj PE=1 SV=1                                    |   | 3.041825 | 1  | 2  | 1  | 58.5   | 8.13 |          | 1300000  | 1000000  | 5.883921 |
| Q8BW75 | Amine oxidase [flavin-containing] B OS=Mus musculus GN=Maob PE=1 SV=4                                                   |   | 7.692308 | 3  | 5  | 2  | 58.52  | 8.29 | 1800000  | 2600000  | 580000   | 11.91156 |
| Q8C729 | Protein FAM126B OS=Mus musculus GN=Fam126b PE=1 SV=1                                                                    |   | 3.018868 | 1  | 1  | 1  | 58.55  | 7.72 |          |          | 1500000  | 2.422554 |
| P63328 | Serine/threonine-protein phosphatase 2B catalytic subunit alpha isoform OS=Mus musculus GN=Ppp3ca PE=1 SV=1             |   | 19.19386 | 9  | 25 | 5  | 58.606 | 5.86 | 10000000 | 6200000  | 6800000  | 73.65409 |
| Q61074 | Protein phosphatase 1G OS=Mus musculus GN=Ppm1g PE=1 SV=3                                                               |   | 22.87823 | 7  | 15 | 7  | 58.691 | 4.39 | 2600000  | 3000000  | 2000000  | 41.97311 |
| Q8R326 | Paraspeckle component 1 OS=Mus musculus GN=Pspc1 PE=1 SV=1                                                              |   | 8.030593 | 4  | 9  | 4  | 58.721 | 6.67 | 3800000  | 3500000  | 3600000  | 22.7677  |
| Q922F2 | 2'-5'-oligoadenylate synthase-like protein 2 OS=Mus musculus GN=Oasl2 PE=1 SV=2                                         |   | 10.62992 | 5  | 14 | 5  | 58.73  | 6.4  | 5100000  | 4400000  | 4300000  | 37.11777 |
| O08795 | Glucosidase 2 subunit beta OS=Mus musculus GN=Prkcs PE=1 SV=1                                                           |   | 26.67946 | 10 | 22 | 10 | 58.756 | 4.46 | 16000000 | 15000000 | 16000000 | 68.65864 |
| P25911 | Tyrosine-protein kinase Lyn OS=Mus musculus GN=Lyn PE=1 SV=4                                                            |   | 8.398438 | 4  | 9  | 3  | 58.775 | 7.15 | 1700000  | 1600000  | 1600000  | 22.73113 |
| Q9D554 | Splicing factor 3A subunit 3 OS=Mus musculus GN=Sf3a3 PE=1 SV=2                                                         |   | 16.16766 | 6  | 14 | 6  | 58.805 | 5.34 | 9000000  | 8700000  | 7100000  | 55.07952 |
| P13597 | Intercellular adhesion molecule 1 OS=Mus musculus GN=Icam1 PE=1 SV=1                                                    |   | 2.607076 | 1  | 3  | 1  | 58.807 | 6.13 | 8000000  | 7300000  | 4900000  | 11.23505 |
| Q9DBF1 | Alpha-aminoacidic semialdehyde dehydrogenase OS=Mus musculus GN=Aldh7a1 PE=1 SV=4                                       |   | 3.153989 | 1  | 3  | 1  | 58.824 | 7.47 | 2000000  | 2300000  | 2100000  | 9.432285 |
| P14234 | Tyrosine-protein kinase Fgr OS=Mus musculus GN=Fgr PE=1 SV=2                                                            |   | 4.255319 | 2  | 5  | 1  | 58.829 | 5.38 |          |          | 980000   | 12.56336 |
| Q8C166 | Copine-1 OS=Mus musculus GN=Cpne1 PE=1 SV=1                                                                             |   | 6.716418 | 4  | 7  | 3  | 58.849 | 5.66 | 830000   | 570000   | 1200000  | 16.5123  |
| Q32MB2 | TREMBL:Q32MB2;Q86Y46 Tax_Id=9606 Gene_Symbol=KRT73 Keratin-73                                                           | x | 6.851852 | 4  | 14 | 0  | 58.887 | 7.23 |          |          |          | 37.69719 |
| Q80SW1 | Putative adenosylhomocysteinase 2 OS=Mus musculus GN=Ahcyl1 PE=1 SV=1                                                   |   | 20.37736 | 10 | 23 | 1  | 58.913 | 6.89 | 2500000  | 1800000  | 1100000  | 57.66125 |
| Q9WV80 | Sorting nexin-1 OS=Mus musculus GN=Snx1 PE=1 SV=1                                                                       |   | 22.41379 | 10 | 23 | 8  | 58.916 | 5.22 | 9000000  | 7200000  | 5600000  | 63.69844 |
| Q8K1N4 | Spermatogenesis-associated serine-rich protein 2 OS=Mus musculus GN=Spats2 PE=1 SV=1                                    |   | 7.155963 | 3  | 7  | 3  | 58.92  | 9    | 1400000  | 1300000  | 1200000  | 20.7392  |
| P70459 | ETS domain-containing transcription factor ERF OS=Mus musculus GN=ErF PE=1 SV=1                                         |   | 7.259528 | 2  | 3  | 2  | 59.014 | 7.28 | 600000   | 420000   |          | 8.8813   |
| Q9D787 | Peptidyl-prolyl cis-trans isomerase-like 2 OS=Mus musculus GN=Ppil2 PE=1 SV=2                                           |   | 3.071017 | 1  | 4  | 1  | 59.028 | 8.38 | 940000   | 1100000  | 880000   | 12.70606 |
| Q99JR8 | SWI/SNF-related matrix-associated actin-dependent regulator of chromatin subfamily D member 2 OS=Mus musculus GN=Smarcd |   | 6.403013 | 2  | 2  | 2  | 59.048 | 9.64 |          | 1000000  |          | 6.052085 |
| Q3TLD5 | Unconventional prefoldin RPB5 interactor OS=Mus musculus GN=Uri1 PE=1 SV=2                                              |   | 4.33145  | 1  | 1  | 1  | 59.048 | 5.07 | 310000   |          |          | 2.512231 |
| Q8BX09 | Retinoblastoma-binding protein 5 OS=Mus musculus GN=Rbbp5 PE=1 SV=2                                                     |   | 2.230483 | 1  | 2  | 1  | 59.061 | 5.1  | 870000   |          | 900000   | 5.320784 |
| Q91WQ3 | Tyrosine--tRNA ligase, cytoplasmic OS=Mus musculus GN=Yars PE=1 SV=3                                                    |   | 20.64394 | 10 | 21 | 10 | 59.068 | 7.01 | 3800000  | 3200000  | 3000000  | 52.60448 |
| Q6NVF9 | Cleavage and polyadenylation specificity factor subunit 6 OS=Mus musculus GN=Cpsf6 PE=1 SV=1                            |   | 9.437387 | 4  | 13 | 4  | 59.116 | 7.15 | 4200000  | 3900000  | 3300000  | 42.91523 |
| P48453 | Serine/threonine-protein phosphatase 2B catalytic subunit beta isoform OS=Mus musculus GN=Ppp3cb PE=1 SV=2              |   | 12.19048 | 6  | 16 | 2  | 59.136 | 5.91 | 920000   | 860000   | 1000000  | 42.35341 |
| Q09200 | Beta-1,4 N-acetylgalactosaminyltransferase 1 OS=Mus musculus GN=B4galnt1 PE=1 SV=1                                      |   | 2.06379  | 1  | 2  | 1  | 59.175 | 8.59 |          | 490000   | 310000   | 4.48529  |
| Q8BKX1 | Brain-specific angiogenesis inhibitor 1-associated protein 2 OS=Mus musculus GN=Baiap2 PE=1 SV=2                        |   | 8.971963 | 4  | 9  | 4  | 59.2   | 9.04 | 3400000  | 1700000  | 2400000  | 28.23295 |
| Q00612 | Glucose-6-phosphate 1-dehydrogenase X OS=Mus musculus GN=G6pdx PE=1 SV=3                                                |   | 8.349515 | 4  | 6  | 4  | 59.225 | 6.49 | 780000   | 2400000  | 3100000  | 13.17039 |
| Q921X9 | Protein disulfide-isomerase A5 OS=Mus musculus GN=Pdia5 PE=1 SV=1                                                       |   | 5.415861 | 2  | 5  | 2  | 59.229 | 7.5  | 1400000  | 3500000  | 2000000  | 13.56648 |



|        |                                                                                                       |   |          |    |     |    |        |        |          |          |          |          |
|--------|-------------------------------------------------------------------------------------------------------|---|----------|----|-----|----|--------|--------|----------|----------|----------|----------|
| E9Q1P8 | Interferon regulatory factor 2-binding protein 2 OS=Mus musculus GN=Irf2bp2 PE=1 SV=1                 |   | 12.10526 | 4  | 7   | 4  | 59.255 | 8.69   | 1200000  | 680000   | 510000   | 27.83088 |
| Q8CV73 | U3 small nucleolar RNA-associated protein 15 homolog OS=Mus musculus GN=Utp15 PE=1 SV=1               |   | 5.30303  | 2  | 2   | 2  | 59.338 | 8.79   | 850000   |          | 410000   | 5.934638 |
| Q8VH51 | RNA-binding protein 39 OS=Mus musculus GN=Rbm39 PE=1 SV=2                                             |   | 16.22642 | 7  | 17  | 7  | 59.37  | 10.1   | 11000000 | 12000000 | 13000000 | 49.90477 |
| Q9JKX4 | Protein AATF OS=Mus musculus GN=Aatf PE=1 SV=1                                                        |   | 4.372624 | 2  | 4   | 2  | 59.446 | 4.93   | 2400000  | 1300000  | 2600000  | 8.68712  |
| O70145 | Neutrophil cytosol factor 2 OS=Mus musculus GN=Ncf2 PE=1 SV=1                                         |   |          | 8  | 2   | 3  | 2      | 59.448 | 6.61     | 1600000  | 1200000  | 10.2223  |
| P13645 | SWISS-PROT:P13645 Tax_Id=9606 Gene_Symbol=KRT10 Keratin, type I cytoskeletal 10                       | x | 44.01349 | 26 | 145 | 22 | 59.475 | 5.21   | 3.6E+08  | 1.2E+08  | 1.4E+09  | 451.9607 |
| P42932 | T-complex protein 1 subunit theta OS=Mus musculus GN=Cct8 PE=1 SV=3                                   |   | 36.67883 | 17 | 41  | 17 | 59.518 | 5.62   | 13000000 | 9400000  | 10000000 | 117.1262 |
| Q8COP5 | Coronin-2A OS=Mus musculus GN=Coro2a PE=2 SV=1                                                        |   | 4.580153 | 2  | 2   | 1  | 59.535 | 7.71   |          |          | 1000000  | 5.17326  |
| Q8BT60 | Copine-3 OS=Mus musculus GN=Cpne3 PE=1 SV=2                                                           |   | 7.317073 | 4  | 6   | 2  | 59.547 | 5.78   |          |          | 1400000  | 14.30373 |
| Q64133 | Amine oxidase [flavin-containing] A OS=Mus musculus GN=Maoa PE=1 SV=3                                 |   | 14.8289  | 7  | 11  | 6  | 59.564 | 7.81   | 5200000  | 3700000  | 5800000  | 28.09283 |
| Q923T9 | Calcium/calmodulin-dependent protein kinase type II subunit gamma OS=Mus musculus GN=Camk2g PE=1 SV=1 |   | 10.20794 | 4  | 12  | 1  | 59.569 | 7.58   | 4600000  | 3300000  | 2300000  | 41.26781 |
| P56564 | Excitatory amino acid transporter 1 OS=Mus musculus GN=Slc1a3 PE=1 SV=2                               |   | 12.70718 | 5  | 23  | 4  | 59.584 | 8.4    | 19000000 | 11000000 | 11000000 | 87.43222 |
| P80316 | T-complex protein 1 subunit epsilon OS=Mus musculus GN=Cct5 PE=1 SV=1                                 |   | 29.02033 | 13 | 35  | 13 | 59.586 | 6.02   | 16000000 | 14000000 | 12000000 | 95.88838 |
| P80313 | T-complex protein 1 subunit eta OS=Mus musculus GN=Cct7 PE=1 SV=1                                     |   | 23.52941 | 11 | 27  | 11 | 59.614 | 7.84   | 16000000 | 14000000 | 14000000 | 71.35174 |
| Q99JF8 | PC4 and SFRS1-interacting protein OS=Mus musculus GN=Psp1 PE=1 SV=1                                   |   | 26.13636 | 10 | 41  | 10 | 59.66  | 9.13   | 19000000 | 15000000 | 17000000 | 138.6125 |
| Q8C5L3 | CCR4-NOT transcription complex subunit 2 OS=Mus musculus GN=Cnot2 PE=1 SV=2                           |   | 5.555556 | 2  | 4   | 2  | 59.673 | 7.66   | 2400000  | 1200000  | 1800000  | 11.78683 |
| Q8BGZ7 | Keratin, type II cytoskeletal 75 OS=Mus musculus GN=Krt75 PE=1 SV=1                                   | x | 15.24501 | 11 | 38  | 1  | 59.704 | 8.31   |          |          | 4200000  | 96.98369 |
| Q8BI72 | CDKN2A-interacting protein OS=Mus musculus GN=Cdkn2aip PE=1 SV=1                                      |   | 14.03197 | 5  | 12  | 5  | 59.708 | 9.16   | 1800000  | 2000000  | 1100000  | 42.10822 |
| Q03265 | ATP synthase subunit alpha, mitochondrial OS=Mus musculus GN=Atp5a1 PE=1 SV=1                         |   | 35.44304 | 19 | 68  | 19 | 59.716 | 9.19   | 1.3E+08  | 95000000 | 98000000 | 212.1319 |
| Q6ZQM8 | UDP-glucuronosyltransferase 1-7C OS=Mus musculus GN=Ugt1a7c PE=1 SV=1                                 |   | 5.461394 | 2  | 4   | 2  | 59.719 | 8.35   | 1900000  | 2900000  | 1800000  | 12.18248 |
| P24270 | Catalase OS=Mus musculus GN=Cat PE=1 SV=4                                                             |   | 5.12334  | 2  | 5   | 2  | 59.758 | 7.88   | 860000   | 970000   | 3100000  | 14.80088 |
| Q99N16 | Leukotriene-B(4) omega-hydroxylase 2 OS=Mus musculus GN=Cyp4f3 PE=1 SV=2                              |   | 2.290076 | 1  | 2   | 1  | 59.804 | 8.53   |          | 1700000  | 1300000  | 4.548967 |
| Q9CWP6 | Motile sperm domain-containing protein 2 OS=Mus musculus GN=Mospd2 PE=1 SV=2                          |   | 5.984556 | 2  | 5   | 2  | 59.817 | 5.67   | 3200000  | 2000000  | 2900000  | 17.8547  |
| O35345 | Importin subunit alpha-7 OS=Mus musculus GN=Kpna6 PE=1 SV=2                                           |   | 12.31343 | 4  | 12  | 2  | 59.926 | 4.94   | 820000   | 880000   | 1700000  | 40.10889 |
| P04259 | SWISS-PROT:P04259 Tax_Id=9606 Gene_Symbol=KRT6B Keratin, type II cytoskeletal 6B                      | x | 39.1844  | 25 | 58  | 2  | 59.962 | 8      | 13000000 |          | 12000000 | 149.6746 |
| P02538 | SWISS-PROT:P02538 Tax_Id=9606 Gene_Symbol=KRT6A Keratin, type II cytoskeletal 6A                      | x | 40.95745 | 26 | 60  | 3  | 60.008 | 8      | 3000000  |          | 12000000 | 154.6831 |
| P36895 | Bone morphogenetic protein receptor type-1A OS=Mus musculus GN=Bmpr1a PE=2 SV=1                       |   | 2.819549 | 1  | 1   | 1  | 60.024 | 7.3    | 220000   |          |          | 2.62796  |
| Q8BMP6 | Golgi resident protein GCP60 OS=Mus musculus GN=Acdb3 PE=1 SV=3                                       |   | 15.2381  | 5  | 12  | 5  | 60.144 | 5.11   | 3500000  | 2600000  | 3800000  | 40.84406 |
| Q60960 | Importin subunit alpha-5 OS=Mus musculus GN=Kpna1 PE=1 SV=2                                           |   | 12.26766 | 4  | 10  | 2  | 60.144 | 5.01   | 1000000  | 1000000  |          | 33.40221 |
| Q8CI33 | CWF19-like protein 1 OS=Mus musculus GN=Cwf19l1 PE=1 SV=2                                             |   | 5.400372 | 2  | 4   | 2  | 60.156 | 7.14   | 1100000  | 1100000  | 980000   | 13.17545 |
| Q04207 | Transcription factor p65 OS=Mus musculus GN=Rela PE=1 SV=1                                            |   | 4.735883 | 2  | 3   | 2  | 60.174 | 5.76   | 870000   | 540000   | 440000   | 6.477543 |
| Q80VP1 | Epsin-1 OS=Mus musculus GN=Epn1 PE=1 SV=3                                                             |   | 1.565217 | 1  | 1   | 1  | 60.175 | 4.81   |          |          |          | 2.127821 |
| Q3UEB3 | Poly(U)-binding-splicing factor PUF60 OS=Mus musculus GN=Puf60 PE=1 SV=2                              |   | 19.85816 | 9  | 22  | 9  | 60.211 | 5.29   | 10000000 | 7600000  | 6400000  | 63.08702 |
| Q8BYI6 | Lysophosphatidylcholine acyltransferase 2 OS=Mus musculus GN=Lpcat2 PE=1 SV=1                         |   | 11.02941 | 5  | 11  | 5  | 60.215 | 5.83   | 3300000  | 3300000  | 3100000  | 29.64895 |
| O35144 | Telomeric repeat-binding factor 2 OS=Mus musculus GN=Terf2 PE=1 SV=3                                  |   | 2.5878   | 1  | 1   | 1  | 60.226 | 9.5    |          | 1000000  |          | 2.929505 |
| Q8VBW6 | NEDD8-activating enzyme E1 regulatory subunit OS=Mus musculus GN=Nae1 PE=1 SV=1                       |   | 3.183521 | 1  | 1   | 1  | 60.236 | 5.52   | 1200000  |          |          | 2.261897 |
| O88939 | Zinc finger and BTB domain-containing protein 7A OS=Mus musculus GN=Zbtb7a PE=1 SV=2                  |   | 4.042179 | 1  | 1   | 1  | 60.243 | 5.12   | 420000   |          |          | 3.219591 |
| Q9Z1W9 | STE20/SPS1-related proline-alanine-rich protein kinase OS=Mus musculus GN=Stk39 PE=1 SV=1             |   | 4.496403 | 2  | 7   | 2  | 60.282 | 6.29   | 1900000  | 1600000  | 960000   | 18.36707 |
| Q6DFW4 | Nucleolar protein 58 OS=Mus musculus GN=Nop58 PE=1 SV=1                                               |   | 27.79851 | 12 | 41  | 12 | 60.305 | 8.34   | 11000000 | 15000000 | 14000000 | 141.1388 |
| P36423 | Thromboxane-A synthase OS=Mus musculus GN=Tbxas1 PE=1 SV=2                                            |   | 2.251407 | 1  | 1   | 1  | 60.352 | 7.15   |          | 510000   |          | 3.081873 |
| Q71M36 | Chondroitin sulfate proteoglycan 5 OS=Mus musculus GN=Cspg5 PE=1 SV=2                                 |   | 7.95053  | 3  | 9   | 3  | 60.368 | 4.54   | 3100000  | 2500000  | 1800000  | 27.64145 |
| P11983 | T-complex protein 1 subunit alpha OS=Mus musculus GN=Tcp1 PE=1 SV=3                                   |   | 24.64029 | 12 | 32  | 12 | 60.411 | 6.16   | 15000000 | 15000000 | 14000000 | 93.13641 |
| P28652 | Calcium/calmodulin-dependent protein kinase type II subunit beta OS=Mus musculus GN=Camk2b PE=1 SV=2  |   | 21.40221 | 9  | 21  | 5  | 60.423 | 7.28   | 6300000  | 4200000  | 3700000  | 69.55936 |
| Q8K2T8 | RNA polymerase II-associated factor 1 homolog OS=Mus musculus GN=Paf1 PE=1 SV=1                       |   | 15.88785 | 6  | 12  | 6  | 60.481 | 4.65   | 2200000  | 2600000  | 2000000  | 36.71439 |
| D0QMC3 | Myeloid cell nuclear differentiation antigen-like protein OS=Mus musculus GN=Mndal PE=1 SV=1          |   | 24.53532 | 8  | 23  | 6  | 60.488 | 9.28   | 5800000  | 5300000  | 6800000  | 64.25607 |
| Q64429 | Cytochrome P450 1B1 OS=Mus musculus GN=Cyp1b1 PE=1 SV=3                                               |   | 2.209945 | 1  | 1   | 1  | 60.499 | 8.43   |          | 760000   |          | 2.527119 |
| Q62523 | Zyxin OS=Mus musculus GN=Zyx PE=1 SV=2                                                                |   | 12.94326 | 5  | 10  | 5  | 60.507 | 6.4    | 3000000  | 3500000  | 1900000  | 32.3255  |
| Q91YH5 | Atlantin-3 OS=Mus musculus GN=Atl3 PE=1 SV=1                                                          |   | 7.763401 | 3  | 7   | 3  | 60.537 | 6.1    | 1500000  | 4500000  | 5000000  | 24.5314  |
| Q9WVK4 | EH domain-containing protein 1 OS=Mus musculus GN=Ehd1 PE=1 SV=1                                      |   | 11.23596 | 5  | 13  | 4  | 60.565 | 6.83   | 5400000  | 5300000  | 3800000  | 38.35788 |
| Q99LI2 | Chloride channel CLIC-like protein 1 OS=Mus musculus GN=Clcc1 PE=1 SV=1                               |   | 7.606679 | 3  | 4   | 3  | 60.582 | 5.68   | 970000   | 1300000  |          | 11.53957 |
| P80318 | T-complex protein 1 subunit gamma OS=Mus musculus GN=Cct3 PE=1 SV=1                                   |   | 35.22936 | 19 | 57  | 19 | 60.591 | 6.7    | 13000000 | 12000000 | 11000000 | 164.2267 |
| P05480 | Neuronal proto-oncogene tyrosine-protein kinase Src OS=Mus musculus GN=Src PE=1 SV=4                  |   | 6.284658 | 3  | 6   | 2  | 60.606 | 7.84   | 2100000  | 1200000  | 2200000  | 15.81721 |
| Q9EP89 | Serine beta-lactamase-like protein LACTB, mitochondrial OS=Mus musculus GN=Lactb PE=1 SV=1            |   | 2.722323 | 1  | 2   | 1  | 60.667 | 8.9    |          |          | 600000   | 6.296052 |

|        |                                                                                                                      |   |          |    |     |    |        |      |          |          |          |          |
|--------|----------------------------------------------------------------------------------------------------------------------|---|----------|----|-----|----|--------|------|----------|----------|----------|----------|
| P14685 | 26S proteasome non-ATPase regulatory subunit 3 OS=Mus musculus GN=Psm3 PE=1 SV=3                                     |   | 23.20755 | 11 | 38  | 11 | 60.68  | 8.44 | 11000000 | 9500000  | 9400000  | 111.3258 |
| O88643 | Serine/threonine-protein kinase PAK 1 OS=Mus musculus GN=Pak1 PE=1 SV=1                                              |   | 13.94495 | 5  | 10  | 3  | 60.699 | 5.74 | 1800000  | 2800000  | 1800000  | 29.84752 |
| Q8CI11 | Guanine nucleotide-binding protein-like 3 OS=Mus musculus GN=Gnl3 PE=1 SV=2                                          |   | 13.3829  | 6  | 11  | 6  | 60.749 | 9.11 | 3900000  | 3700000  | 3800000  | 29.75474 |
| Q9QXY6 | EH domain-containing protein 3 OS=Mus musculus GN=Ehd3 PE=1 SV=2                                                     |   | 13.08411 | 6  | 10  | 4  | 60.783 | 6.46 | 2500000  | 1900000  |          | 30.01419 |
| Q60996 | Serine/threonine-protein phosphatase 2A 56 kDa regulatory subunit gamma isoform OS=Mus musculus GN=Ppp2r5c PE=1 SV=2 |   | 2.480916 | 1  | 1   | 1  | 60.785 | 6.64 |          | 1100000  |          | 2.151478 |
| Q3TEA8 | Heterochromatin protein 1-binding protein 3 OS=Mus musculus GN=Hp1bp3 PE=1 SV=1                                      |   | 28.51986 | 13 | 34  | 13 | 60.829 | 9.7  | 13000000 | 15000000 | 15000000 | 90.60674 |
| Q60715 | Prolyl 4-hydroxylase subunit alpha-1 OS=Mus musculus GN=P4ha1 PE=1 SV=2                                              |   | 18.91386 | 8  | 24  | 8  | 60.872 | 5.9  | 6500000  | 5700000  | 5000000  | 74.62272 |
| P63038 | 60 kDa heat shock protein, mitochondrial OS=Mus musculus GN=Hspd1 PE=1 SV=1                                          |   | 40.48866 | 22 | 69  | 22 | 60.917 | 6.18 | 42000000 | 51000000 | 29000000 | 228.2064 |
| Q3UHD6 | Sorting nexin-27 OS=Mus musculus GN=Snx27 PE=1 SV=2                                                                  |   | 8.90538  | 5  | 7   | 5  | 60.95  | 6.4  | 1600000  | 1600000  | 1200000  | 18.22071 |
| Q60716 | Prolyl 4-hydroxylase subunit alpha-2 OS=Mus musculus GN=P4ha2 PE=1 SV=1                                              |   | 2.607076 | 1  | 3   | 1  | 60.964 | 5.8  | 1200000  | 1300000  | 970000   | 8.147555 |
| Q9D281 | Protein Noxp20 OS=Mus musculus GN=Fam114a1 PE=1 SV=1                                                                 |   | 2.636204 | 1  | 2   | 1  | 60.975 | 4.56 | 740000   |          | 590000   | 4.900565 |
| P59108 | Copine-2 OS=Mus musculus GN=Cpne2 PE=1 SV=1                                                                          |   | 3.10219  | 2  | 2   | 1  | 60.997 | 5.96 |          | 460000   |          | 3.993275 |
| Q99J27 | Acetyl-coenzyme A transporter 1 OS=Mus musculus GN=Slc33a1 PE=1 SV=1                                                 |   | 4.545455 | 2  | 2   | 2  | 61.036 | 8.16 |          | 130000   |          | 4.020675 |
| P20060 | Beta-hexosaminidase subunit beta OS=Mus musculus GN=Hexb PE=1 SV=2                                                   |   | 15.67164 | 7  | 14  | 7  | 61.077 | 8.12 | 3600000  | 5700000  | 2600000  | 33.55567 |
| Q8BH64 | EH domain-containing protein 2 OS=Mus musculus GN=Ehd2 PE=1 SV=1                                                     |   | 2.025783 | 1  | 1   | 1  | 61.136 | 6.51 |          | 470000   |          | 1.961124 |
| Q8BFR4 | N-acetylglucosamine-6-sulfatase OS=Mus musculus GN=Gns PE=1 SV=1                                                     |   | 1.286765 | 1  | 1   | 1  | 61.136 | 8.24 |          |          |          | 1.934239 |
| Q3UV70 | [Pyruvate dehydrogenase [acetyl-transferring]]-phosphatase 1, mitochondrial OS=Mus musculus GN=Pdp1 PE=1 SV=1        |   | 2.973978 | 1  | 2   | 1  | 61.142 | 6.67 | 1600000  |          | 1000000  | 6.489214 |
| Q9DOR4 | Probable ATP-dependent RNA helicase DDX56 OS=Mus musculus GN=Ddx56 PE=2 SV=1                                         |   | 2.564103 | 1  | 4   | 1  | 61.174 | 9.17 |          |          |          | 13.09639 |
| Q5S516 | U3 small nucleolar RNA-associated protein 18 homolog OS=Mus musculus GN=Utp18 PE=1 SV=1                              |   | 4.710145 | 2  | 4   | 2  | 61.18  | 8.78 | 2100000  | 2000000  | 3000000  | 15.53541 |
| Q64516 | Glycerol kinase OS=Mus musculus GN=Gk PE=1 SV=2                                                                      |   | 1.431127 | 1  | 1   | 1  | 61.188 | 5.87 |          |          | 960000   | 2.521912 |
| Q60598 | Src substrate cortactin OS=Mus musculus GN=Ctn PE=1 SV=2                                                             |   | 23.80952 | 9  | 17  | 9  | 61.212 | 5.4  | 5400000  | 6800000  | 5000000  | 44.31494 |
| E9QAG8 | Zinc finger protein 431 OS=Mus musculus GN=Znf431 PE=1 SV=1                                                          |   | 1.520913 | 1  | 1   | 1  | 61.241 | 9.03 |          |          | 600000   | 2.217375 |
| P26443 | Glutamate dehydrogenase 1, mitochondrial OS=Mus musculus GN=Glud1 PE=1 SV=1                                          |   | 40.14337 | 18 | 69  | 18 | 61.298 | 8    | 49000000 | 44000000 | 42000000 | 206.5587 |
| Q8BIQ5 | Cleavage stimulation factor subunit 2 OS=Mus musculus GN=Cstf2 PE=1 SV=2                                             |   | 16.2069  | 6  | 10  | 6  | 61.302 | 6.83 | 1600000  | 1700000  | 2700000  | 28.79877 |
| Q3ULD5 | Methylcrotonoyl-CoA carboxylase beta chain, mitochondrial OS=Mus musculus GN=Mccc2 PE=1 SV=1                         |   | 3.552398 | 1  | 1   | 1  | 61.34  | 8    |          |          | 590000   | 3.517359 |
| Q9D0F9 | Phosphoglucomutase-1 OS=Mus musculus GN=Pgm1 PE=1 SV=4                                                               |   | 4.270463 | 2  | 4   | 2  | 61.38  | 6.57 | 1600000  | 750000   | 1400000  | 11.92134 |
| Q61207 | Prosapopin OS=Mus musculus GN=Pspap PE=1 SV=2                                                                        |   | 12.56732 | 7  | 17  | 7  | 61.381 | 5.19 | 9700000  | 9500000  | 7400000  | 42.14961 |
| Q8VC31 | Coiled-coil domain-containing protein 9 OS=Mus musculus GN=Ccdc9 PE=2 SV=1                                           |   | 2.578269 | 1  | 2   | 1  | 61.408 | 5    | 570000   |          | 100000   | 4.689723 |
| O88447 | Kinesin light chain 1 OS=Mus musculus GN=Klc1 PE=1 SV=3                                                              |   | 11.27542 | 5  | 9   | 5  | 61.412 | 5.68 | 2600000  | 1800000  | 1900000  | 26.42505 |
| Q9CSN1 | SNW domain-containing protein 1 OS=Mus musculus GN=Snw1 PE=1 SV=3                                                    |   | 15.48507 | 6  | 14  | 6  | 61.438 | 9.48 | 4400000  | 4400000  | 3600000  | 39.38284 |
| Q9EQP2 | EH domain-containing protein 4 OS=Mus musculus GN=Ehd4 PE=1 SV=1                                                     |   | 16.63586 | 7  | 14  | 6  | 61.441 | 6.76 | 4600000  | 5000000  | 3800000  | 43.95088 |
| P08551 | Neurofilament light polypeptide OS=Mus musculus GN=Nefl PE=1 SV=5                                                    |   | 35.17495 | 18 | 49  | 17 | 61.471 | 4.64 | 16000000 | 7100000  | 8400000  | 136.7804 |
| Q8R5H6 | Wiskott-Aldrich syndrome protein family member 1 OS=Mus musculus GN=Wasf1 PE=1 SV=2                                  |   | 2.146691 | 1  | 2   | 1  | 61.471 | 6.37 | 2800000  | 1400000  |          | 6.71451  |
| Q9EQF6 | Dihydropyrimidinase-related protein 5 OS=Mus musculus GN=Dpysl5 PE=1 SV=1                                            |   | 4.964539 | 2  | 3   | 2  | 61.477 | 7.09 | 1600000  |          |          | 6.476785 |
| Q6A0D4 | Raftlin OS=Mus musculus GN=Rftn1 PE=1 SV=4                                                                           |   | 2.707581 | 1  | 1   | 1  | 61.499 | 7.68 |          |          | 950000   | 2.646146 |
| Q9WV34 | MAGUK p55 subfamily member 2 OS=Mus musculus GN=Mpp2 PE=1 SV=1                                                       |   | 1.811594 | 1  | 1   | 1  | 61.517 | 6.44 | 730000   |          |          | 2.750991 |
| Q3TX4  | Vesicular glutamate transporter 1 OS=Mus musculus GN=Slc17a7 PE=1 SV=2                                               |   | 8.035714 | 4  | 7   | 4  | 61.597 | 7.34 | 6600000  | 3200000  | 4900000  | 17.0481  |
| Q91WJ7 | SPATS2-like protein OS=Mus musculus GN=Spats2l PE=2 SV=2                                                             |   | 1.792115 | 1  | 3   | 1  | 61.631 | 9.69 | 840000   | 970000   | 1000000  | 8.683054 |
| Q8R3Y8 | Interferon regulatory factor 2-binding protein 1 OS=Mus musculus GN=Irf2bp1 PE=1 SV=2                                |   | 2.568493 | 1  | 1   | 1  | 61.712 | 8.18 |          | 170000   |          | 2.042948 |
| Q8BMC3 | SHC-transforming protein 2 OS=Mus musculus GN=Shc2 PE=1 SV=3                                                         |   | 2.966841 | 1  | 1   | 1  | 61.732 | 6.7  |          | 380000   |          | 2.130631 |
| Q7Z794 | SWISS-PROT:Q7Z794 Tax_Id=9606 Gene_Symbol=KRT77 Keratin 77                                                           | x | 24.56747 | 14 | 30  | 10 | 61.764 | 5.85 |          |          | 13000000 | 85.63704 |
| Q5U4E2 | Replication initiator 1 OS=Mus musculus GN=Repin1 PE=1 SV=1                                                          |   | 2.018349 | 1  | 1   | 1  | 61.79  | 9.91 |          | 260000   |          | 2.150865 |
| Q9DBA9 | General transcription factor IIH subunit 1 OS=Mus musculus GN=Gtf2h1 PE=1 SV=2                                       |   | 3.107861 | 1  | 1   | 1  | 61.812 | 8.76 |          | 250000   |          | 3.389296 |
| Q9JLV1 | BAG family molecular chaperone regulator 3 OS=Mus musculus GN=Bag3 PE=1 SV=2                                         |   | 6.759099 | 3  | 4   | 3  | 61.822 | 7.27 | 1000000  | 1300000  |          | 11.45447 |
| Q5SU73 | Coilin OS=Mus musculus GN=Coil PE=1 SV=1                                                                             |   | 5.263158 | 2  | 7   | 2  | 61.879 | 9    | 850000   | 510000   | 550000   | 17.88537 |
| Q62188 | Dihydropyrimidinase-related protein 3 OS=Mus musculus GN=Dpysl3 PE=1 SV=1                                            |   | 18.24561 | 8  | 23  | 5  | 61.897 | 6.49 | 2600000  | 1900000  | 2100000  | 75.30193 |
| Q35098 | Dihydropyrimidinase-related protein 4 OS=Mus musculus GN=Dpysl4 PE=1 SV=1                                            |   | 7.867133 | 3  | 6   | 2  | 61.922 | 6.98 | 1600000  | 1100000  |          | 19.56303 |
| Q8R317 | Ubiquilin-1 OS=Mus musculus GN=Ubqln1 PE=1 SV=1                                                                      |   | 2.57732  | 1  | 3   | 1  | 61.937 | 4.94 | 1600000  | 1600000  | 1600000  | 7.616127 |
| Q91VU6 | DDB1- and CUL4-associated factor 11 OS=Mus musculus GN=Dcaf11 PE=1 SV=1                                              |   | 3.278689 | 1  | 3   | 1  | 61.953 | 6.44 | 300000   | 310000   |          | 8.605833 |
| P06683 | Complement component C9 OS=Mus musculus GN=C9 PE=1 SV=2                                                              |   | 2.189781 | 1  | 2   | 1  | 61.962 | 5.78 | 700000   |          | 400000   | 4.782071 |
| P43006 | Excitatory amino acid transporter 2 OS=Mus musculus GN=Slc1a2 PE=1 SV=1                                              |   | 14.68531 | 8  | 26  | 8  | 61.99  | 6.68 | 38000000 | 19000000 | 16000000 | 75.73976 |
| Q8BUV8 | Protein GPR107 OS=Mus musculus GN=Gpr107 PE=1 SV=2                                                                   |   | 1.633394 | 1  | 1   | 1  | 62.016 | 7.59 |          | 730000   |          | 1.849473 |
| P35527 | SWISS-PROT:P35527 Tax_Id=9606 Gene_Symbol=KRT9 Keratin, type I cytoskeletal 9                                        | x | 49.91974 | 23 | 152 | 22 | 62.092 | 5.3  | 3.3E+08  | 44000000 | 7.5E+08  | 511.7361 |

|        |                                                                                               |   |          |    |    |    |        |       |          |          |          |          |
|--------|-----------------------------------------------------------------------------------------------|---|----------|----|----|----|--------|-------|----------|----------|----------|----------|
| Q80VL1 | Tudor and KH domain-containing protein OS=Mus musculus GN=Tdrkh PE=1 SV=1                     |   | 7.857143 | 3  | 7  | 3  | 62.095 | 4.94  | 1000000  | 750000   | 1000000  | 19.72142 |
| P97427 | Dihydropyrimidinase-related protein 1 OS=Mus musculus GN=Crm1 PE=1 SV=1                       |   | 16.78322 | 7  | 25 | 3  | 62.129 | 7.12  | 6000000  | 3300000  | 3000000  | 86.4008  |
| Q8BXA5 | Cleft lip and palate transmembrane protein 1-like protein OS=Mus musculus GN=Clptm1 PE=1 SV=1 |   | 4.823748 | 2  | 4  | 2  | 62.143 | 8.84  | 2000000  | 2500000  | 2900000  | 11.82993 |
| Q6DID7 | Protein wntless homolog OS=Mus musculus GN=Wls PE=1 SV=1                                      |   | 3.512015 | 2  | 4  | 2  | 62.147 | 7.65  | 1800000  | 1500000  | 2000000  | 9.73711  |
| O08553 | Dihydropyrimidinase-related protein 2 OS=Mus musculus GN=Dpysl2 PE=1 SV=2                     |   | 49.12587 | 19 | 90 | 15 | 62.239 | 6.38  | 72000000 | 48000000 | 52000000 | 300.3316 |
| Q91YT7 | YTH domain-containing family protein 2 OS=Mus musculus GN=Ythdf2 PE=1 SV=1                    |   | 3.972366 | 2  | 6  | 1  | 62.242 | 8.79  | 4400000  |          | 3000000  | 17.52973 |
| Q9CQG2 | Methyltransferase-like protein 16 OS=Mus musculus GN=Mettl16 PE=1 SV=1                        |   | 2.169982 | 1  | 2  | 1  | 62.301 | 7.36  | 740000   |          | 820000   | 5.142928 |
| Q6PAM1 | Alpha-taxilin OS=Mus musculus GN=Txlna PE=1 SV=1                                              |   | 23.10469 | 8  | 17 | 8  | 62.33  | 6.74  | 2600000  | 2900000  | 2500000  | 52.55897 |
| P13647 | SWISS-PROT:P13647 Tax_Id=9606 Gene_Symbol=KRT5 Keratin, type II cytoskeletal 5                | x | 41.01695 | 27 | 82 | 14 | 62.34  | 7.74  | 26000000 | 6800000  | 1.3E+08  | 220.912  |
| Q9CZX0 | Elongator complex protein 3 OS=Mus musculus GN=Elp3 PE=1 SV=1                                 |   | 2.559415 | 1  | 3  | 1  | 62.345 | 8.9   | 11000000 |          | 3000000  | 8.632321 |
| P34914 | Bifunctional epoxide hydrolase 2 OS=Mus musculus GN=Ephx2 PE=1 SV=2                           |   | 3.429603 | 1  | 2  | 1  | 62.475 | 6.19  | 300000   |          | 170000   | 4.54978  |
| Q60864 | Stress-induced-phosphoprotein 1 OS=Mus musculus GN=Stip1 PE=1 SV=1                            |   | 24.49355 | 11 | 34 | 11 | 62.542 | 6.8   | 12000000 | 13000000 | 10000000 | 100.4123 |
| Q3U0K8 | Prolyl 3-hydroxylase OGFOD1 OS=Mus musculus GN=Ogfod1 PE=1 SV=1                               |   | 3.302752 | 1  | 3  | 1  | 62.695 | 4.91  | 590000   | 610000   | 410000   | 10.36647 |
| P03975 | IgE-binding protein OS=Mus musculus GN=lap PE=2 SV=1                                          |   | 10.23339 | 4  | 16 | 4  | 62.708 | 9.31  | 27000000 | 31000000 | 30000000 | 52.73227 |
| P06745 | Glucose-6-phosphate isomerase OS=Mus musculus GN=Gpi PE=1 SV=4                                |   | 16.84588 | 8  | 25 | 8  | 62.727 | 8.13  | 11000000 | 9900000  | 7600000  | 73.0092  |
| Q99PN3 | Tripartite motif-containing protein 26 OS=Mus musculus GN=Trim26 PE=2 SV=3                    |   | 2.018349 | 1  | 1  | 1  | 62.769 | 5.05  | 430000   |          |          | 2.456306 |
| Q61211 | Eukaryotic translation initiation factor 2D OS=Mus musculus GN=Eif2d PE=1 SV=3                |   | 8.421053 | 3  | 7  | 3  | 62.79  | 8.24  | 2500000  | 2100000  | 2100000  | 23.10499 |
| Q61508 | Extracellular matrix protein 1 OS=Mus musculus GN=Ecm1 PE=1 SV=2                              |   | 7.692308 | 3  | 8  | 3  | 62.792 | 6.8   | 2000000  | 1500000  | 970000   | 22.92065 |
| Q3UV17 | Keratin, type II cytoskeletal 2 oral OS=Mus musculus GN=Krt76 PE=1 SV=1                       |   | 8.754209 | 7  | 22 | 1  | 62.806 | 8.43  | 5.1E+08  | 97000000 | 1.6E+09  | 52.21707 |
| Q8VCM8 | Nicalin OS=Mus musculus GN=Ncln PE=1 SV=2                                                     |   | 6.039076 | 3  | 5  | 3  | 62.868 | 6.49  | 2200000  | 2000000  |          | 12.49263 |
| Q91WG5 | 5'-AMP-activated protein kinase subunit gamma-2 OS=Mus musculus GN=Prkag2 PE=1 SV=2           |   | 1.766784 | 1  | 1  | 1  | 62.91  | 9.36  |          | 1100000  |          | 2.259486 |
| P97363 | Serine palmitoyltransferase 2 OS=Mus musculus GN=Sptlc2 PE=1 SV=2                             |   | 2.142857 | 1  | 1  | 1  | 62.941 | 8.18  | 1500000  |          |          | 2.789302 |
| Q8BRG8 | Transmembrane protein 209 OS=Mus musculus GN=Tmem209 PE=2 SV=1                                |   | 1.782531 | 1  | 2  | 1  | 62.942 | 8.73  |          | 480000   | 270000   | 4.218041 |
| Q9VWM3 | Anaphase-promoting complex subunit 7 OS=Mus musculus GN=Anapc7 PE=1 SV=3                      |   | 2.123894 | 1  | 1  | 1  | 62.981 | 5.72  |          |          | 630000   | 2.145911 |
| Q8VEG6 | CCR4-NOT transcription complex subunit 6-like OS=Mus musculus GN=Cnot6l PE=1 SV=2             |   | 2.522523 | 1  | 1  | 1  | 62.983 | 6.57  |          |          |          | 2.049494 |
| Q9Z1Q2 | Protein ABHD16A OS=Mus musculus GN=Abhd16a PE=1 SV=3                                          |   | 7.706093 | 4  | 7  | 4  | 63.046 | 8.25  | 1500000  | 2000000  | 2100000  | 16.81097 |
| Q3UHB1 | 5'-nucleotidase domain-containing protein 3 OS=Mus musculus GN=Nt5dc3 PE=1 SV=1               |   | 2.197802 | 1  | 2  | 1  | 63.13  | 8.56  | 1300000  |          | 970000   | 5.473676 |
| O08914 | Fatty-acid amide hydrolase 1 OS=Mus musculus GN=Faah PE=1 SV=1                                |   | 1.554404 | 1  | 1  | 1  | 63.18  | 7.87  | 350000   |          |          | 2.276165 |
| Q5U458 | Dnaj homolog subfamily C member 11 OS=Mus musculus GN=Dnajc11 PE=1 SV=2                       |   | 2.146691 | 1  | 1  | 1  | 63.194 | 8.32  |          |          | 910000   | 2.568801 |
| Q3UUU6 | TBC1 domain family member 24 OS=Mus musculus GN=Tbc1d24 PE=1 SV=2                             |   | 4.634581 | 2  | 3  | 2  | 63.195 | 7.24  | 1100000  | 670000   |          | 7.841077 |
| Q8C854 | Myelin expression factor 2 OS=Mus musculus GN=Myef2 PE=1 SV=1                                 |   | 13.36717 | 8  | 18 | 8  | 63.254 | 8.87  | 8000000  | 7100000  | 6400000  | 57.83409 |
| Q8CI51 | PDZ and LIM domain protein 5 OS=Mus musculus GN=Pdlim5 PE=1 SV=4                              |   | 15.56684 | 6  | 18 | 6  | 63.259 | 8.25  | 5100000  | 4300000  | 2400000  | 58.461   |
| Q64332 | Synapsin-2 OS=Mus musculus GN=Syn2 PE=1 SV=2                                                  |   | 17.23549 | 7  | 18 | 6  | 63.333 | 8.43  | 6900000  | 3200000  | 3000000  | 60.95357 |
| Q8BH66 | Atlantin-1 OS=Mus musculus GN=Atl1 PE=1 SV=1                                                  |   | 2.508961 | 1  | 2  | 1  | 63.337 | 6.49  | 2700000  | 1400000  |          | 7.287272 |
| Q8BXN9 | Transmembrane protein 87A OS=Mus musculus GN=Tmem87a PE=1 SV=1                                |   | 7.027027 | 3  | 6  | 3  | 63.339 | 6.67  | 4400000  | 3100000  | 2100000  | 17.869   |
| P28798 | Granulins OS=Mus musculus GN=Grn PE=1 SV=2                                                    |   | 9.50764  | 4  | 8  | 4  | 63.413 | 6.8   | 1200000  | 2200000  | 990000   | 20.31039 |
| Q8CHU3 | Epsin-2 OS=Mus musculus GN=Epn2 PE=1 SV=1                                                     |   | 4.369748 | 2  | 3  | 2  | 63.433 | 8.16  | 1400000  |          | 640000   | 8.475637 |
| P46061 | Ran GTPase-activating protein 1 OS=Mus musculus GN=Rangap1 PE=1 SV=2                          |   | 18.16638 | 10 | 18 | 10 | 63.491 | 4.68  | 4700000  | 6400000  | 6800000  | 54.33163 |
| Q9JHW4 | Selenocysteine-specific elongation factor OS=Mus musculus GN=Eefsec PE=1 SV=2                 |   | 2.744425 | 1  | 2  | 1  | 63.498 | 8.29  | 850000   |          | 830000   | 6.061346 |
| Q9CPN8 | Insulin-like growth factor 2 mRNA-binding protein 3 OS=Mus musculus GN=Igf2bp3 PE=1 SV=1      |   | 13.29879 | 5  | 11 | 4  | 63.535 | 8.87  | 1800000  | 1200000  | 1900000  | 30.74994 |
| Q505F5 | Leucine-rich repeat-containing protein 47 OS=Mus musculus GN=Lrrc47 PE=1 SV=1                 |   | 8.261618 | 4  | 8  | 4  | 63.551 | 8.1   | 3600000  | 3100000  | 2300000  | 22.54792 |
| Q9JIA1 | Leucine-rich glioma-inactivated protein 1 OS=Mus musculus GN=Lgi1 PE=1 SV=1                   |   | 3.949731 | 2  | 4  | 2  | 63.603 | 8.02  | 1100000  | 600000   |          | 9.485981 |
| Q99P91 | Transmembrane glycoprotein NMB OS=Mus musculus GN=Gpnm3 PE=1 SV=2                             |   | 3.484321 | 2  | 4  | 2  | 63.635 | 7.61  | 2400000  | 2400000  | 3600000  | 11.00407 |
| Q8ROX7 | Sphingosine-1-phosphate lyase 1 OS=Mus musculus GN=Sgpl1 PE=1 SV=1                            |   | 14.78873 | 7  | 19 | 7  | 63.636 | 9.1   | 12000000 | 9800000  | 9800000  | 58.81057 |
| Q8BMK4 | Cytoskeleton-associated protein 4 OS=Mus musculus GN=Ckap4 PE=1 SV=2                          |   | 43.65217 | 23 | 75 | 23 | 63.654 | 5.64  | 23000000 | 23000000 | 21000000 | 238.5036 |
| Q80SY5 | Pre-mRNA-splicing factor 38B OS=Mus musculus GN=Prpf38b PE=1 SV=1                             |   | 2.214022 | 1  | 3  | 1  | 63.715 | 10.54 | 3000000  | 2800000  | 2700000  | 8.82166  |
| Q61263 | Sterol O-acyltransferase 1 OS=Mus musculus GN=Soat1 PE=1 SV=2                                 |   | 2.962963 | 1  | 1  | 1  | 63.757 | 9.01  |          |          | 800000   | 3.188209 |
| Q5NCR9 | Nuclear speckle splicing regulatory protein 1 OS=Mus musculus GN=Nsrp1 PE=1 SV=1              |   | 2.398524 | 1  | 3  | 1  | 63.761 | 8.76  | 1300000  | 1100000  | 1300000  | 7.115392 |
| Q80WJ7 | Protein LYRIC OS=Mus musculus GN=Mtdh PE=1 SV=1                                               |   | 32.8152  | 17 | 52 | 17 | 63.808 | 9.33  | 13000000 | 14000000 | 13000000 | 149.6445 |
| Q61712 | Dnaj homolog subfamily C member 1 OS=Mus musculus GN=Dnajc1 PE=1 SV=1                         |   | 4.166667 | 2  | 4  | 2  | 63.83  | 8.97  | 750000   | 1100000  | 1100000  | 11.26485 |
| Q4VBD2 | Transmembrane anterior posterior transformation protein 1 OS=Mus musculus GN=Tapt1 PE=1 SV=2  |   | 1.77305  | 1  | 1  | 1  | 63.853 | 8.22  |          | 1500000  |          | 2.59529  |
| Q69Z99 | Zinc finger protein 512 OS=Mus musculus GN=Znf512 PE=2 SV=2                                   |   | 14.59075 | 5  | 8  | 5  | 63.867 | 9.51  | 640000   | 2600000  | 1800000  | 24.00371 |
| Q5EG47 | 5'-AMP-activated protein kinase catalytic subunit alpha-1 OS=Mus musculus GN=Prkaa1 PE=1 SV=2 |   | 3.041145 | 1  | 3  | 1  | 63.889 | 8.12  | 1400000  | 1300000  | 830000   | 7.771606 |

|        |                                                                                                                        |          |    |     |    |        |      |          |          |          |          |
|--------|------------------------------------------------------------------------------------------------------------------------|----------|----|-----|----|--------|------|----------|----------|----------|----------|
| P06801 | NADP-dependent malic enzyme OS=Mus musculus GN=Me1 PE=1 SV=2                                                           | 8.041958 | 5  | 11  | 5  | 63.913 | 7.44 | 3700000  | 2400000  | 2600000  | 27.11506 |
| Q8BYK6 | YTH domain-containing family protein 3 OS=Mus musculus GN=Ythdf3 PE=1 SV=2                                             | 4.273504 | 2  | 6   | 1  | 63.922 | 9.04 | 1700000  | 1600000  | 1800000  | 15.25472 |
| Q8R081 | Heterogeneous nuclear ribonucleoprotein L OS=Mus musculus GN=HnrrnpL PE=1 SV=2                                         | 40.78498 | 16 | 63  | 16 | 63.923 | 8.1  | 65000000 | 56000000 | 56000000 | 215.8132 |
| O70194 | Eukaryotic translation initiation factor 3 subunit D OS=Mus musculus GN=Eif3d PE=1 SV=2                                | 25.36496 | 11 | 32  | 11 | 63.948 | 6.05 | 13000000 | 12000000 | 12000000 | 99.52233 |
| Q9Z1K5 | E3 ubiquitin-protein ligase ARIH1 OS=Mus musculus GN=Arih1 PE=1 SV=3                                                   | 2.522523 | 1  | 3   | 1  | 63.975 | 5.08 |          | 2600000  | 1700000  | 9.350566 |
| Q921F4 | Heterogeneous nuclear ribonucleoprotein L-like OS=Mus musculus GN=Hnrrnpl PE=1 SV=3                                    | 21.15059 | 8  | 22  | 8  | 64.084 | 5.85 | 6400000  | 6000000  | 6000000  | 75.30607 |
| Q9CWJ9 | Bifunctional purine biosynthesis protein PURH OS=Mus musculus GN=Atic PE=1 SV=2                                        | 12.33108 | 4  | 6   | 4  | 64.177 | 6.76 | 3200000  | 1100000  |          | 19.1753  |
| O08912 | Polypeptide N-acetylgalactosaminyltransferase 1 OS=Mus musculus GN=Galnt1 PE=1 SV=1                                    | 2.504472 | 1  | 1   | 1  | 64.213 | 7.71 | 1000000  |          |          | 2.228726 |
| Q8BP47 | Asparagine--tRNA ligase, cytoplasmic OS=Mus musculus GN=Nars PE=1 SV=2                                                 | 14.84794 | 6  | 16  | 6  | 64.238 | 5.86 | 6900000  | 7300000  | 6500000  | 48.33369 |
| Q61024 | Asparagine synthetase [glutamine-hydrolyzing] OS=Mus musculus GN=Asns PE=1 SV=3                                        | 3.743316 | 2  | 2   | 2  | 64.241 | 6.58 |          | 2000000  |          | 4.443497 |
| Q3UDK1 | TRAF-type zinc finger domain-containing protein 1 OS=Mus musculus GN=Trafd1 PE=1 SV=1                                  | 3.62069  | 1  | 3   | 1  | 64.242 | 5.48 | 1900000  | 2000000  | 1700000  | 10.48855 |
| Q9EP97 | Sentrin-specific protease 3 OS=Mus musculus GN=Senp3 PE=1 SV=1                                                         | 5.633803 | 2  | 5   | 2  | 64.362 | 8.75 | 1300000  | 1700000  | 1500000  | 16.33182 |
| Q8BJW6 | Eukaryotic translation initiation factor 2A OS=Mus musculus GN=Eif2a PE=1 SV=2                                         | 9.466437 | 4  | 7   | 4  | 64.363 | 8.91 | 2000000  | 4700000  | 1700000  | 19.46792 |
| Q9D6Z1 | Nucleolar protein 56 OS=Mus musculus GN=Nop56 PE=1 SV=2                                                                | 33.62069 | 17 | 34  | 17 | 64.424 | 9.14 | 21000000 | 23000000 | 22000000 | 100.9763 |
| O08539 | Myc box-dependent-interacting protein 1 OS=Mus musculus GN=Bin1 PE=1 SV=1                                              | 16.83673 | 7  | 14  | 6  | 64.43  | 5.03 | 7700000  | 5600000  | 5200000  | 44.5956  |
| Q8VI36 | Paxillin OS=Mus musculus GN=Pxn PE=1 SV=1                                                                              | 4.399323 | 2  | 3   | 2  | 64.435 | 6.02 | 650000   | 710000   |          | 7.573042 |
| Q07797 | Galectin-3-binding protein OS=Mus musculus GN=Lgals3bp PE=1 SV=1                                                       | 18.37088 | 7  | 17  | 7  | 64.45  | 5.14 | 7500000  | 6100000  | 6100000  | 58.51624 |
| Q6PB93 | Polypeptide N-acetylgalactosaminyltransferase 2 OS=Mus musculus GN=Galnt2 PE=1 SV=1                                    | 11.92982 | 6  | 11  | 6  | 64.473 | 8.53 | 1800000  | 2800000  | 3200000  | 31.25411 |
| Q61481 | Calcium/calmodulin-dependent 3',5'-cyclic nucleotide phosphodiesterase 1A OS=Mus musculus GN=Pde1a PE=1 SV=2           | 1.946903 | 1  | 3   | 1  | 64.487 | 5.97 | 790000   | 510000   | 610000   | 7.484131 |
| Q61576 | Peptidyl-prolyl cis-trans isomerase FKBP10 OS=Mus musculus GN=Fkbp10 PE=1 SV=2                                         | 7.57315  | 3  | 5   | 3  | 64.656 | 5.64 | 2500000  | 1900000  | 1900000  | 13.62472 |
| Q05CL8 | La-related protein 7 OS=Mus musculus GN=Larp7 PE=1 SV=2                                                                | 10.87719 | 5  | 10  | 5  | 64.762 | 9.54 | 480000   | 490000   | 1100000  | 26.30124 |
| Q921I2 | Kelch domain-containing protein 4 OS=Mus musculus GN=Klhdc4 PE=2 SV=2                                                  | 6.678082 | 2  | 2   | 2  | 64.82  | 5.73 | 690000   | 160000   |          | 5.485547 |
| Q9D824 | Pre-mRNA 3'-end-processing factor FIP1 OS=Mus musculus GN=Fip111 PE=1 SV=1                                             | 7.745267 | 3  | 5   | 3  | 64.92  | 5.77 |          | 2100000  | 2200000  | 12.04343 |
| Q9CWL8 | Beta-catenin-like protein 1 OS=Mus musculus GN=Ctnnb1 PE=1 SV=1                                                        | 9.236234 | 4  | 13  | 4  | 64.939 | 5.07 | 2900000  | 2900000  | 2100000  | 47.43748 |
| Q9JHK4 | Geranylgeranyl transferase type-2 subunit alpha OS=Mus musculus GN=Rabggt2 PE=1 SV=1                                   | 1.763668 | 1  | 1   | 1  | 64.948 | 5.8  | 1000000  |          |          | 2.088521 |
| Q8R366 | Immunoglobulin superfamily member 8 OS=Mus musculus GN=Igsf8 PE=1 SV=2                                                 | 7.855974 | 3  | 6   | 3  | 64.97  | 7.99 | 1200000  | 570000   | 650000   | 17.19337 |
| P97390 | Vacuolar protein sorting-associated protein 45 OS=Mus musculus GN=Vps45 PE=1 SV=1                                      | 4.736842 | 3  | 6   | 3  | 65.012 | 8.25 | 1500000  | 1500000  | 1.3E+08  | 14.25879 |
| Q61490 | CD166 antigen OS=Mus musculus GN=Alcam PE=1 SV=3                                                                       | 4.631218 | 2  | 2   | 2  | 65.051 | 6.15 | 860000   |          |          | 5.333592 |
| Q3TIX9 | U4/U6.U5 tri-snRNP-associated protein 2 OS=Mus musculus GN=Usp39 PE=1 SV=2                                             | 4.964539 | 3  | 5   | 3  | 65.106 | 8.9  | 2600000  | 2300000  | 3300000  | 11.29081 |
| Q8BLH7 | HIRA-interacting protein 3 OS=Mus musculus GN=Hirip3 PE=1 SV=1                                                         | 6.821963 | 4  | 7   | 4  | 65.176 | 7.84 | 410000   | 980000   | 590000   | 23.86645 |
| O88291 | DBIRD complex subunit ZNF326 OS=Mus musculus GN=Znf326 PE=1 SV=1                                                       | 12.06897 | 5  | 11  | 5  | 65.185 | 5.19 | 6600000  | 5000000  | 6700000  | 31.62796 |
| Q8BX57 | PX domain-containing protein kinase-like protein OS=Mus musculus GN=Pxx PE=1 SV=2                                      | 2.061856 | 1  | 3   | 1  | 65.19  | 9.38 | 1000000  | 1200000  | 1200000  | 8.893564 |
| P55194 | SH3 domain-binding protein 1 OS=Mus musculus GN=Sh3bp1 PE=1 SV=2                                                       | 9.650582 | 4  | 13  | 4  | 65.244 | 5.68 | 1500000  | 1600000  | 1800000  | 38.11757 |
| Q61093 | Cytochrome b-245 heavy chain OS=Mus musculus GN=Cybb PE=1 SV=1                                                         | 9.649123 | 4  | 13  | 4  | 65.262 | 7.72 | 6700000  | 7100000  | 4400000  | 40.83404 |
| Q91W39 | Nuclear receptor coactivator 5 OS=Mus musculus GN=Ncoa5 PE=1 SV=1                                                      | 10.18998 | 3  | 5   | 3  | 65.28  | 9.82 | 1400000  | 1900000  | 1400000  | 13.42912 |
| Q76MZ3 | Serine/threonine-protein phosphatase 2A 65 kDa regulatory subunit A alpha isoform OS=Mus musculus GN=Ppp2r1a PE=1 SV=3 | 13.24278 | 6  | 17  | 6  | 65.281 | 5.11 | 11000000 | 13000000 | 9100000  | 50.65027 |
| Q07643 | Collagen alpha-2(IX) chain OS=Mus musculus GN=Col9a2 PE=2 SV=1                                                         | 3.924419 | 2  | 9   | 2  | 65.281 | 9.36 | 5400000  | 4600000  | 4300000  | 27.65471 |
| Q9DC48 | Pre-mRNA-processing factor 17 OS=Mus musculus GN=Cdc40 PE=2 SV=1                                                       | 6.908463 | 3  | 5   | 3  | 65.42  | 7.06 | 810000   | 1400000  | 500000   | 13.15711 |
| Q80UG5 | Septin-9 OS=Mus musculus GN=Sept9 PE=1 SV=1                                                                            | 27.61578 | 13 | 37  | 13 | 65.534 | 8.9  | 12000000 | 14000000 | 9600000  | 114.9744 |
| Q55F07 | Insulin-like growth factor 2 mRNA-binding protein 2 OS=Mus musculus GN=Igf2bp2 PE=1 SV=1                               | 10.13514 | 4  | 8   | 3  | 65.543 | 8.03 | 2200000  | 1200000  | 3900000  | 21.65128 |
| Q9Z1M8 | Protein Red OS=Mus musculus GN=Ik PE=1 SV=2                                                                            | 10.41293 | 5  | 11  | 5  | 65.576 | 6.64 | 2100000  | 2700000  | 2600000  | 27.38992 |
| Q8BQ30 | Phostensin OS=Mus musculus GN=Ppp1r18 PE=1 SV=1                                                                        | 9.59596  | 4  | 8   | 4  | 65.59  | 5.39 | 1900000  | 2500000  | 1700000  | 24.63408 |
| Q8C4Y3 | Negative elongation factor B OS=Mus musculus GN=Nelfb PE=1 SV=2                                                        | 4.137931 | 2  | 2   | 2  | 65.594 | 6.02 |          | 1100000  | 1200000  | 5.308868 |
| Q9WUA2 | Phenylalanine--tRNA ligase beta subunit OS=Mus musculus GN=Farsb PE=1 SV=2                                             | 11.03565 | 6  | 16  | 6  | 65.655 | 7.12 | 3800000  | 2600000  | 2800000  | 43.04067 |
| Q8BXQ2 | GPI transamidase component PIG-T OS=Mus musculus GN=Pigt PE=1 SV=2                                                     | 2.061856 | 1  | 1   | 1  | 65.663 | 8.4  |          |          | 6500000  | 3.502191 |
| Q61730 | Interleukin-1 receptor accessory protein OS=Mus musculus GN=Il1rap PE=1 SV=1                                           | 3.333333 | 2  | 3   | 2  | 65.699 | 7.77 | 1700000  |          | 1300000  | 6.124537 |
| Q99KE1 | NAD-dependent malic enzyme, mitochondrial OS=Mus musculus GN=Me2 PE=1 SV=1                                             | 2.546689 | 1  | 2   | 1  | 65.757 | 7.61 | 1500000  | 1200000  |          | 6.572536 |
| P35908 | SWISS-PROT:P35908 Tax_Id=9606 Gene_Symbol=KRT2 Keratin, type II cytoskeletal 2 epidermal                               | 56.27907 | 36 | 161 | 26 | 65.825 | 8    | 1.9E+08  | 32000000 | 6.3E+08  | 499.0657 |
| Q8BFW7 | Lipoma-preferred partner homolog OS=Mus musculus GN=Lpp PE=1 SV=1                                                      | 10.27732 | 4  | 7   | 4  | 65.848 | 7.37 | 2400000  | 2400000  | 790000   | 18.71028 |
| Q60862 | Origin recognition complex subunit 2 OS=Mus musculus GN=Orc2 PE=1 SV=1                                                 | 2.256944 | 1  | 1   | 1  | 65.853 | 6.81 |          | 770000   |          | 3.061909 |
| Q8BU11 | TOX high mobility group box family member 4 OS=Mus musculus GN=Tox4 PE=1 SV=3                                          | 3.877221 | 2  | 3   | 2  | 65.92  | 5.01 | 1200000  |          | 1200000  | 8.015034 |
| O70293 | G protein-coupled receptor kinase 6 OS=Mus musculus GN=Grk6 PE=1 SV=1                                                  | 2.430556 | 1  | 2   | 1  | 65.936 | 8.1  | 1700000  | 1200000  |          | 5.263599 |
| P04264 | SWISS-PROT:P04264 Tax_Id=9606 Gene_Symbol=KRT1 Keratin, type II cytoskeletal 1                                         | 54.50311 | 39 | 217 | 31 | 65.978 | 8.12 | 6.6E+08  | 1.1E+08  | 2.2E+09  | 634.3299 |



|        |                                                                                                                             |          |    |     |    |        |      |          |          |          |          |
|--------|-----------------------------------------------------------------------------------------------------------------------------|----------|----|-----|----|--------|------|----------|----------|----------|----------|
| Q8N7N5 | DDB1- and CUL4-associated factor 8 OS=Mus musculus GN=Dcaf8 PE=1 SV=1                                                       | 7.445008 | 3  | 8   | 3  | 65.991 | 5.87 | 520000   | 800000   | 440000   | 21.12116 |
| Q9QXN3 | Activating signal cointegrator 1 OS=Mus musculus GN=Trip4 PE=1 SV=2                                                         | 1.72117  | 1  | 1   | 1  | 66.156 | 7.55 |          | 730000   |          | 2.389147 |
| Q60775 | ETS-related transcription factor Elf-1 OS=Mus musculus GN=Elf1 PE=1 SV=1                                                    | 2.124183 | 1  | 3   | 1  | 66.18  | 4.97 | 1200000  | 1100000  | 750000   | 8.989172 |
| Q64324 | Syntaxin-binding protein 2 OS=Mus musculus GN=Stxbp2 PE=1 SV=1                                                              | 8.094435 | 3  | 6   | 3  | 66.315 | 6.74 | 1800000  | 790000   | 760000   | 16.81947 |
| O88342 | WD repeat-containing protein 1 OS=Mus musculus GN=Wdr1 PE=1 SV=3                                                            | 24.25743 | 10 | 25  | 10 | 66.365 | 6.6  | 10000000 | 9800000  | 8400000  | 71.61643 |
| Q91VH2 | Sorting nexin-9 OS=Mus musculus GN=Snx9 PE=1 SV=1                                                                           | 3.865546 | 2  | 2   | 2  | 66.504 | 5.52 | 430000   |          | 1400000  | 4.670436 |
| O08832 | Polypeptide N-acetylgalactosaminyltransferase 4 OS=Mus musculus GN=Galnt4 PE=2 SV=1                                         | 1.903114 | 1  | 1   | 1  | 66.513 | 7.37 | 930000   |          |          | 2.285153 |
| Q8QZY1 | Eukaryotic translation initiation factor 3 subunit L OS=Mus musculus GN=Eif3l PE=1 SV=1                                     | 22.69504 | 10 | 25  | 10 | 66.57  | 6.44 | 19000000 | 21000000 | 9500000  | 79.44798 |
| P48318 | Glutamate decarboxylase 1 OS=Mus musculus GN=Gad1 PE=1 SV=2                                                                 | 4.047218 | 2  | 2   | 2  | 66.605 | 7.17 | 960000   |          |          | 4.313135 |
| O88448 | Kinesin light chain 2 OS=Mus musculus GN=Klc2 PE=1 SV=1                                                                     | 5.008347 | 2  | 2   | 2  | 66.621 | 7.21 |          |          | 550000   | 4.903059 |
| P70698 | CTP synthase 1 OS=Mus musculus GN=Ctps1 PE=1 SV=2                                                                           | 10.99831 | 5  | 10  | 5  | 66.64  | 6.58 | 2700000  | 3400000  | 2600000  | 28.27939 |
| Q6PIP5 | NudC domain-containing protein 1 OS=Mus musculus GN=Nudcd1 PE=1 SV=2                                                        | 1.890034 | 1  | 1   | 1  | 66.662 | 5.3  |          | 1400000  |          | 3.00513  |
| Q920E6 | Guanylate-binding protein 1 OS=Mus musculus GN=Gbp2 PE=1 SV=1                                                               | 21.73175 | 11 | 46  | 11 | 66.697 | 5.71 | 78000000 | 81000000 | 64000000 | 158.593  |
| Q92511 | ATPase family AAA domain-containing protein 3 OS=Mus musculus GN=Atad3 PE=1 SV=1                                            | 8.798646 | 4  | 7   | 4  | 66.701 | 9.29 | 3400000  | 1900000  | 1200000  | 16.14456 |
| Q920X1 | Apoptosis-inducing factor 1, mitochondrial OS=Mus musculus GN=Aifm1 PE=1 SV=1                                               | 14.05229 | 6  | 14  | 6  | 66.724 | 9.17 | 4000000  | 3400000  | 4200000  | 42.81475 |
| Q9JLZ6 | Hypermethylated in cancer 2 protein OS=Mus musculus GN=Hic2 PE=2 SV=4                                                       | 1.615509 | 1  | 3   | 1  | 66.724 | 6.35 | 5000000  | 3100000  | 3600000  | 8.689398 |
| Q921T2 | Torsin-1A-interacting protein 1 OS=Mus musculus GN=Tor1aip1 PE=1 SV=3                                                       | 24.53782 | 9  | 24  | 9  | 66.74  | 7.05 | 9700000  | 7800000  | 9400000  | 76.95042 |
| P14733 | Lamin-B1 OS=Mus musculus GN=Lmnb1 PE=1 SV=3                                                                                 | 58.67347 | 36 | 151 | 32 | 66.745 | 5.16 | 48000000 | 46000000 | 49000000 | 446.4928 |
| Q68FL4 | Putative adenosylhomocysteinase 3 OS=Mus musculus GN=Ahcyl2 PE=1 SV=1                                                       | 18.43393 | 10 | 22  | 1  | 66.857 | 7.36 | 2900000  | 2200000  |          | 56.99337 |
| Q8CFB4 | Guanylate-binding protein 5 OS=Mus musculus GN=Gbp5 PE=1 SV=2                                                               | 17.79661 | 10 | 27  | 10 | 66.888 | 6.09 | 20000000 | 15000000 | 15000000 | 76.49922 |
| Q9EP69 | Phosphatidylinositol phosphatase SAC1 OS=Mus musculus GN=Sacm1l PE=1 SV=1                                                   | 4.258944 | 3  | 5   | 3  | 66.901 | 7.3  | 1600000  | 3300000  | 2600000  | 10.64768 |
| Q8VCW4 | Protein unc-93 homolog B1 OS=Mus musculus GN=Unc93b1 PE=1 SV=2                                                              | 2.842809 | 1  | 3   | 1  | 66.937 | 6.42 | 3400000  | 2800000  | 2100000  | 11.26072 |
| P31648 | Sodium- and chloride-dependent GABA transporter 1 OS=Mus musculus GN=Slc6a1 PE=1 SV=2                                       | 1.669449 | 1  | 3   | 1  | 66.957 | 7.96 | 3000000  | 1400000  | 1500000  | 7.898378 |
| Q924K8 | Metastasis-associated protein MTA3 OS=Mus musculus GN=Mta3 PE=1 SV=1                                                        | 2.876481 | 1  | 3   | 1  | 67.035 | 8.88 | 3300000  | 3300000  | 2400000  | 11.85294 |
| Q9JMH6 | Thioredoxin reductase 1, cytoplasmic OS=Mus musculus GN=Txnrd1 PE=1 SV=3                                                    | 1.794454 | 1  | 3   | 1  | 67.042 | 7.44 | 2900000  | 2600000  | 1800000  | 9.096159 |
| Q6VN19 | Ran-binding protein 10 OS=Mus musculus GN=Ranbp10 PE=1 SV=2                                                                 | 2.741935 | 1  | 1   | 1  | 67.146 | 6.58 |          | 470000   |          | 2.320061 |
| P35564 | Calnexin OS=Mus musculus GN=Canx PE=1 SV=1                                                                                  | 37.39425 | 21 | 85  | 21 | 67.236 | 4.64 | 1.5E+08  | 1.2E+08  | 1.2E+08  | 265.4151 |
| P61222 | ATP-binding cassette sub-family E member 1 OS=Mus musculus GN=Abce1 PE=1 SV=1                                               | 9.18197  | 5  | 14  | 5  | 67.271 | 8.34 | 5700000  | 6100000  | 7100000  | 39.67107 |
| P21619 | Lamin-B2 OS=Mus musculus GN=Lmnb2 PE=1 SV=2                                                                                 | 30.36913 | 18 | 47  | 14 | 67.277 | 5.5  | 12000000 | 11000000 | 11000000 | 137.0585 |
| Q8CHY6 | Transcriptional repressor p66 alpha OS=Mus musculus GN=Gatad2a PE=1 SV=2                                                    | 7.154213 | 3  | 10  | 3  | 67.292 | 9.89 | 1800000  | 1800000  | 1700000  | 28.76851 |
| Q8CE64 | Zinc finger protein 276 OS=Mus musculus GN=Znf276 PE=2 SV=3                                                                 | 2.442997 | 1  | 1   | 1  | 67.296 | 8.29 | 190000   |          |          | 2.801921 |
| Q9QZM0 | Ubiquitin-2 OS=Mus musculus GN=Ubln2 PE=1 SV=2                                                                              | 2.351097 | 1  | 2   | 1  | 67.308 | 5.22 | 1500000  |          | 880000   | 5.303054 |
| Q80YN3 | Breast carcinoma-amplified sequence 1 homolog OS=Mus musculus GN=Bcas1 PE=1 SV=3                                            | 14.84992 | 6  | 19  | 6  | 67.336 | 6.21 | 3600000  | 5200000  | 4400000  | 59.23462 |
| Q9ET30 | Transmembrane 9 superfamily member 3 OS=Mus musculus GN=Tm9sf3 PE=1 SV=1                                                    | 5.621806 | 4  | 13  | 4  | 67.5   | 7.21 | 6400000  | 6600000  | 4800000  | 34.02401 |
| Q9D2N9 | Vacuolar protein sorting-associated protein 33A OS=Mus musculus GN=Vps33a PE=1 SV=2                                         | 1.839465 | 1  | 1   | 1  | 67.512 | 7.08 |          | 1500000  |          | 2.491272 |
| P29351 | Tyrosine-protein phosphatase non-receptor type 6 OS=Mus musculus GN=Ptpn6 PE=1 SV=2                                         | 29.2437  | 14 | 42  | 14 | 67.517 | 7.81 | 16000000 | 15000000 | 13000000 | 121.8303 |
| O08599 | Syntaxin-binding protein 1 OS=Mus musculus GN=Stxbp1 PE=1 SV=2                                                              | 30.47138 | 18 | 63  | 18 | 67.526 | 6.96 | 42000000 | 26000000 | 25000000 | 184.8836 |
| Q9CZW5 | Mitochondrial import receptor subunit TOM70 OS=Mus musculus GN=Tomm70 PE=1 SV=2                                             | 12.43863 | 8  | 19  | 8  | 67.547 | 7.53 | 10000000 | 8700000  | 8100000  | 50.98514 |
| P40142 | Transketolase OS=Mus musculus GN=Tkt PE=1 SV=1                                                                              | 23.11396 | 11 | 37  | 11 | 67.588 | 7.5  | 14000000 | 13000000 | 10000000 | 114.1914 |
| P26041 | Moesin OS=Mus musculus GN=Msn PE=1 SV=3                                                                                     | 42.28769 | 23 | 77  | 15 | 67.725 | 6.6  | 21000000 | 28000000 | 19000000 | 226.7853 |
| Q9EQ61 | Pescadillo homolog OS=Mus musculus GN=Pes1 PE=1 SV=1                                                                        | 9.246575 | 3  | 6   | 3  | 67.753 | 6.84 | 1200000  | 910000   | 500000   | 18.64789 |
| Q99MN1 | Lysine-tRNA ligase OS=Mus musculus GN=Kars PE=1 SV=1                                                                        | 26.55462 | 13 | 35  | 13 | 67.796 | 5.94 | 7900000  | 6900000  | 6400000  | 97.68621 |
| Q91ZR2 | Sorting nexin-18 OS=Mus musculus GN=Snx18 PE=1 SV=1                                                                         | 4.397394 | 2  | 4   | 2  | 67.862 | 6.67 | 1100000  | 1700000  | 300000   | 11.19563 |
| Q8BMF4 | Dihydropyridyllysine-residue acetyltransferase component of pyruvate dehydrogenase complex, mitochondrial OS=Mus musculus G | 11.05919 | 5  | 8   | 5  | 67.899 | 8.57 | 7700000  | 2200000  | 5900000  | 23.27503 |
| Q60770 | Syntaxin-binding protein 3 OS=Mus musculus GN=Stxbp3 PE=1 SV=1                                                              | 6.081081 | 3  | 7   | 3  | 67.899 | 8.02 | 1500000  | 1400000  | 1900000  | 22.61352 |
| Q8BIA4 | F-box/WD repeat-containing protein 8 OS=Mus musculus GN=Fbxw8 PE=1 SV=2                                                     | 1.839465 | 1  | 1   | 1  | 67.913 | 6.16 | 390000   |          |          | 2.143739 |
| P60670 | Nuclear protein localization protein 4 homolog OS=Mus musculus GN=Nploc4 PE=1 SV=3                                          | 5.098684 | 3  | 4   | 3  | 67.974 | 6.46 | 2500000  | 1900000  |          | 11.00097 |
| Q9WU79 | Proline dehydrogenase 1, mitochondrial OS=Mus musculus GN=Prodh PE=1 SV=2                                                   | 1.669449 | 1  | 1   | 1  | 67.993 | 8.24 | 500000   |          |          | 2.247401 |
| Q8BHJ9 | Pre-mRNA-splicing factor SLU7 OS=Mus musculus GN=Slu7 PE=1 SV=1                                                             | 7.179487 | 3  | 3   | 3  | 68.038 | 7.08 | 770000   | 3500000  | 670000   | 9.99529  |
| Q921G7 | Electron transfer flavoprotein-ubiquinone oxidoreductase, mitochondrial OS=Mus musculus GN=Etfdh PE=1 SV=1                  | 9.090909 | 5  | 11  | 5  | 68.048 | 7.58 | 4300000  | 3800000  | 4700000  | 30.13492 |
| Q61010 | E3 ubiquitin-protein ligase DTX1 OS=Mus musculus GN=Dtx1 PE=1 SV=2                                                          | 4.14673  | 1  | 1   | 1  | 68.076 | 9.55 |          |          | 1100000  | 2.556886 |
| P15636 | SWISS-PROT:P15636 Protease I precursor Lysyl endopeptidase Achromobacter lyticus.                                           | 24.65544 | 11 | 209 | 11 | 68.083 | 7.24 | 3.9E+09  | 3.9E+09  | 2.7E+09  | 854.1845 |
| Q91X20 | Set1/Ash2 histone methyltransferase complex subunit ASH2 OS=Mus musculus GN=Ash2l PE=1 SV=1                                 | 1.284109 | 1  | 1   | 1  | 68.207 | 5.69 |          |          | 1100000  | 1.877327 |

|          |                                                                                                            |   |          |    |     |    |        |      |          |          |          |           |
|----------|------------------------------------------------------------------------------------------------------------|---|----------|----|-----|----|--------|------|----------|----------|----------|-----------|
| P50516   | V-type proton ATPase catalytic subunit A OS=Mus musculus GN=Atp6v1a PE=1 SV=2                              |   | 20.25932 | 12 | 39  | 12 | 68.283 | 5.58 | 16000000 | 10000000 | 10000000 | 105.7069  |
| Q921M0   | P2X purinoceptor 7 OS=Mus musculus GN=P2rx7 PE=1 SV=2                                                      |   | 4.705882 | 2  | 8   | 2  | 68.344 | 8.22 | 1400000  | 2600000  | 1700000  | 22.86084  |
| O88487   | Cytoplasmic dynein 1 intermediate chain 2 OS=Mus musculus GN=Dync1i2 PE=1 SV=1                             |   | 12.5817  | 5  | 17  | 5  | 68.352 | 5.29 | 16000000 | 13000000 | 10000000 | 61.41895  |
| P35235   | Tyrosine-protein phosphatase non-receptor type 11 OS=Mus musculus GN=Ptpn11 PE=1 SV=2                      |   | 4.522613 | 2  | 3   | 2  | 68.417 | 7.3  | 1400000  | 2200000  |          | 9.163301  |
| Q61545   | RNA-binding protein EWS OS=Mus musculus GN=Ewsr1 PE=1 SV=2                                                 |   | 7.175573 | 3  | 12  | 3  | 68.42  | 9.33 | 6500000  | 6600000  | 5700000  | 39.97691  |
| Q6ZPL9   | ATP-dependent RNA helicase DDX55 OS=Mus musculus GN=Ddx55 PE=1 SV=2                                        |   | 1.5      | 1  | 2   | 1  | 68.421 | 9.38 | 500000   | 410000   |          | 4.07005   |
| Q8CJ53   | Cdc42-interacting protein 4 OS=Mus musculus GN=Trip10 PE=1 SV=2                                            |   | 2.155887 | 1  | 1   | 1  | 68.447 | 5.9  | 430000   |          |          | 2.156428  |
| Q99KN9   | Clathrin interactor 1 OS=Mus musculus GN=Clint1 PE=1 SV=2                                                  |   | 10.14263 | 5  | 8   | 5  | 68.469 | 6.25 | 4800000  | 3000000  | 3700000  | 24.08694  |
| Q91YQ5   | Dolichyl-diphosphooligosaccharide--protein glycosyltransferase subunit 1 OS=Mus musculus GN=Rpn1 PE=1 SV=1 |   | 22.20395 | 12 | 37  | 12 | 68.486 | 6.46 | 31000000 | 28000000 | 30000000 | 107.2003  |
| Q91WJ8   | Far upstream element-binding protein 1 OS=Mus musculus GN=Fubp1 PE=1 SV=1                                  |   | 8.448541 | 4  | 11  | 3  | 68.497 | 7.93 | 2200000  | 1600000  | 1400000  | 31.25564  |
| P26043   | Radixin OS=Mus musculus GN=Rdx PE=1 SV=3                                                                   |   | 22.81304 | 13 | 34  | 4  | 68.5   | 6.2  | 2400000  | 4700000  | 3200000  | 95.41341  |
| Q8BGZ4   | Cell division cycle protein 23 homolog OS=Mus musculus GN=Cdc23 PE=1 SV=2                                  |   | 2.177554 | 1  | 3   | 1  | 68.518 | 7.18 | 2600000  | 2000000  | 1700000  | 8.113169  |
| Q8R050   | Eukaryotic peptide chain release factor GTP-binding subunit ERF3A OS=Mus musculus GN=Gsp1 PE=1 SV=2        |   | 7.54717  | 3  | 3   | 3  | 68.582 | 5.21 |          | 3500000  |          | 9.395604  |
| P07724   | Serum albumin OS=Mus musculus GN=Alb PE=1 SV=3                                                             |   | 63.98026 | 33 | 132 | 31 | 68.648 | 6.07 | 98000000 | 94000000 | 97000000 | 398.6003  |
| Q8JZ55   | Acyl-CoA dehydrogenase family member 9, mitochondrial OS=Mus musculus GN=Acad9 PE=1 SV=2                   |   | 3.36     | 2  | 4   | 2  | 68.679 | 7.46 | 2600000  | 2500000  | 2000000  | 10.21772  |
| P36916   | Guanine nucleotide-binding protein-like 1 OS=Mus musculus GN=Gnl1 PE=1 SV=4                                |   | 5.601318 | 3  | 4   | 3  | 68.729 | 5.68 | 1200000  | 1300000  | 1100000  | 9.596326  |
| Q8BGD9   | Eukaryotic translation initiation factor 4B OS=Mus musculus GN=Eif4b PE=1 SV=1                             |   | 21.76759 | 11 | 24  | 11 | 68.799 | 5.67 | 7900000  | 10000000 | 6000000  | 76.76806  |
| Q3ULAA   | F-box/WD repeat-containing protein 1A OS=Mus musculus GN=Btrc PE=1 SV=2                                    |   | 1.983471 | 1  | 1   | 1  | 68.878 | 7.88 |          |          | 580000   | 2.513061  |
| Q9DBU0   | Transmembrane 9 superfamily member 1 OS=Mus musculus GN=Tm9sf1 PE=2 SV=2                                   |   | 1.980198 | 1  | 2   | 1  | 68.883 | 7.09 |          | 2100000  | 2800000  | 5.137907  |
| Q60596   | DNA repair protein XRCC1 OS=Mus musculus GN=Xrcc1 PE=1 SV=2                                                |   | 3.328051 | 2  | 4   | 2  | 68.929 | 6.33 | 1900000  | 1600000  | 1300000  | 11.75496  |
| P35922   | Synaptic functional regulator FMR1 OS=Mus musculus GN=Fmr1 PE=1 SV=1                                       |   | 7.81759  | 4  | 8   | 3  | 68.947 | 7.62 | 2200000  | 2300000  | 2400000  | 24.86885  |
| Q6A028   | Switch-associated protein 70 OS=Mus musculus GN=Swap70 PE=1 SV=2                                           |   | 2.051282 | 1  | 1   | 1  | 68.953 | 6.05 |          |          | 1900000  | 3.221696  |
| Q8VEE4   | Replication protein A 70 kDa DNA-binding subunit OS=Mus musculus GN=Rpa1 PE=1 SV=1                         |   | 2.086677 | 1  | 1   | 1  | 68.994 | 7.91 |          | 3900000  |          | 5.1370572 |
| Q9Z0H1   | WD repeat-containing protein 46 OS=Mus musculus GN=Wdr46 PE=2 SV=1                                         |   | 3.376206 | 1  | 1   | 1  | 69.005 | 9.77 |          |          | 440000   | 2.237817  |
| P24527   | Leukotriene A-4 hydrolase OS=Mus musculus GN=Lta4h PE=1 SV=4                                               |   | 8.674304 | 4  | 8   | 4  | 69.007 | 6.42 | 2000000  | 2400000  | 2500000  | 24.43334  |
| Q9DBG6   | Dolichyl-diphosphooligosaccharide--protein glycosyltransferase subunit 2 OS=Mus musculus GN=Rpn2 PE=1 SV=1 |   | 15.21395 | 7  | 19  | 7  | 69.02  | 5.81 | 13000000 | 13000000 | 10000000 | 58.82475  |
| Q8JZN7   | Mitochondrial Rho GTPase 2 OS=Mus musculus GN=Rhot2 PE=1 SV=1                                              |   | 2.258065 | 1  | 1   | 1  | 69.027 | 6    |          | 990000   |          | 3.160822  |
| Q9JHS4   | ATP-dependent Clp protease ATP-binding subunit clpX-like, mitochondrial OS=Mus musculus GN=Clpx PE=1 SV=2  |   | 8.675079 | 4  | 13  | 4  | 69.186 | 7.71 | 1100000  | 960000   | 1000000  | 39.18907  |
| P20917   | Myelin-associated glycoprotein OS=Mus musculus GN=Mag PE=1 SV=2                                            |   | 2.236422 | 1  | 1   | 1  | 69.216 | 5.1  | 4600000  |          |          | 3.178081  |
| Q61656   | Probable ATP-dependent RNA helicase DDX5 OS=Mus musculus GN=Ddx5 PE=1 SV=2                                 |   | 35.66775 | 24 | 75  | 17 | 69.247 | 8.92 | 31000000 | 30000000 | 31000000 | 197.709   |
| O89103   | Complement component C1q receptor OS=Mus musculus GN=Cd93 PE=1 SV=1                                        |   | 1.863354 | 1  | 2   | 1  | 69.309 | 5.07 | 1100000  |          | 1000000  | 5.792049  |
| P02768-1 | SWISS-PROT:P02768-1 Tax_Id=9606 Gene_Symbol=ALB Isoform 1 of Serum albumin precursor                       | x | 14.28571 | 8  | 14  | 6  | 69.321 | 6.28 | 1400000  | 1200000  | 4000000  | 35.44424  |
| P26040   | Ezrin OS=Mus musculus GN=Ezr PE=1 SV=3                                                                     |   | 26.96246 | 17 | 49  | 9  | 69.364 | 6.1  | 11000000 | 8800000  | 8600000  | 143.653   |
| Q8C2Q3   | RNA-binding protein 14 OS=Mus musculus GN=Rbm14 PE=1 SV=1                                                  |   | 18.23617 | 10 | 20  | 10 | 69.406 | 9.67 | 3400000  | 3500000  | 3300000  | 51.42654  |
| P23475   | X-ray repair cross-complementing protein 6 OS=Mus musculus GN=Xrcc6 PE=1 SV=5                              |   | 16.28289 | 8  | 17  | 8  | 69.441 | 6.79 | 3100000  | 3300000  | 3200000  | 54.20989  |
| Q9Z2X8   | Kelch-like ECH-associated protein 1 OS=Mus musculus GN=Keap1 PE=1 SV=1                                     |   | 4.00641  | 2  | 2   | 2  | 69.508 | 6.44 | 1700000  | 590000   |          | 4.732821  |
| Q8R361   | Rab11 family-interacting protein 5 OS=Mus musculus GN=Rab11fip5 PE=1 SV=2                                  |   | 2.790698 | 1  | 4   | 1  | 69.51  | 9.07 | 260000   | 310000   | 73000    | 8.580914  |
| Q6P1B1   | Xaa-Pro aminopeptidase 1 OS=Mus musculus GN=Xpnpep1 PE=1 SV=1                                              |   | 2.889246 | 1  | 2   | 1  | 69.547 | 5.54 | 4600000  | 390000   |          | 5.321411  |
| P10404   | MLV-related proviral Env polyprotein OS=Mus musculus PE=1 SV=3                                             |   | 16.22465 | 9  | 24  | 7  | 69.569 | 7.96 | 32000000 | 24000000 | 27000000 | 77.36435  |
| Q9DBG7   | Signal recognition particle receptor subunit alpha OS=Mus musculus GN=Srpra PE=1 SV=1                      |   | 8.490566 | 5  | 11  | 5  | 69.579 | 8.95 | 1900000  | 3000000  | 3600000  | 25.71014  |
| Q7TMK9   | Heterogeneous nuclear ribonucleoprotein Q OS=Mus musculus GN=Syncrip PE=1 SV=2                             |   | 31.13965 | 15 | 46  | 15 | 69.59  | 8.59 | 22000000 | 18000000 | 18000000 | 130.376   |
| P17156   | Heat shock-related 70 kDa protein 2 OS=Mus musculus GN=Hspa2 PE=1 SV=2                                     |   | 24.32859 | 14 | 60  | 4  | 69.599 | 5.67 | 3400000  | 1800000  | 1700000  | 191.4953  |
| Q9CXI3   | DBH-like monooxygenase protein 1 OS=Mus musculus GN=Moxd1 PE=1 SV=1                                        |   | 10.27732 | 6  | 18  | 6  | 69.633 | 6.67 | 9000000  | 9200000  | 9100000  | 48.74402  |
| Q68ED3   | Non-canonical poly(A) RNA polymerase PAPD5 OS=Mus musculus GN=Papd5 PE=1 SV=2                              |   | 2.369668 | 1  | 1   | 1  | 69.661 | 8.78 |          | 130000   |          | 2.053637  |
| Q99LJ0   | CTTNBP2 N-terminal-like protein OS=Mus musculus GN=Cttnbp2l PE=1 SV=1                                      |   | 8.46395  | 5  | 12  | 5  | 69.798 | 7.71 | 1500000  | 1500000  | 1200000  | 33.41071  |
| Q923D5   | WW domain-binding protein 11 OS=Mus musculus GN=Wbp11 PE=1 SV=2                                            |   | 7.4883   | 4  | 10  | 4  | 69.831 | 8.4  | 2900000  | 2600000  | 2800000  | 27.24802  |
| Q8COE3   | Tripartite motif-containing protein 47 OS=Mus musculus GN=Trim47 PE=1 SV=2                                 |   | 2.340094 | 1  | 1   | 1  | 69.868 | 6.4  |          |          |          | 3.27973   |
| P31650   | Sodium- and chloride-dependent GABA transporter 3 OS=Mus musculus GN=Slc6a11 PE=1 SV=2                     |   | 5.741627 | 3  | 5   | 3  | 69.914 | 6.98 | 3600000  |          | 2600000  | 12.66533  |
| Q8BZR9   | Nuclear cap-binding protein subunit 3 OS=Mus musculus GN=Ncbp3 PE=1 SV=1                                   |   | 5.691057 | 2  | 4   | 2  | 70     | 5.8  | 1000000  | 1700000  | 1200000  | 12.02081  |
| Q8R4C2   | RUN and FYVE domain-containing protein 2 OS=Mus musculus GN=Rufy2 PE=1 SV=2                                |   | 1.815182 | 1  | 1   | 1  | 70.049 | 5.83 |          |          | 3500000  | 2.771088  |
| P43404   | Tyrosine-protein kinase ZAP-70 OS=Mus musculus GN=Zap70 PE=1 SV=3                                          |   | 2.427184 | 1  | 1   | 1  | 70.066 | 7.83 |          | 780000   |          | 3.086769  |
| Q61233   | Plastin-2 OS=Mus musculus GN=Lcp1 PE=1 SV=4                                                                |   | 28.70813 | 13 | 34  | 11 | 70.105 | 5.33 | 6400000  | 5700000  | 4900000  | 101.9366  |
| P17879   | Heat shock 70 kDa protein 1B OS=Mus musculus GN=Hspa1b PE=1 SV=3                                           |   | 11.99377 | 6  | 23  | 1  | 70.133 | 5.72 | 1800000  | 850000   | 470000   | 70.7727   |

|        |                                                                                                    |          |    |     |    |        |      |          |          |          |          |
|--------|----------------------------------------------------------------------------------------------------|----------|----|-----|----|--------|------|----------|----------|----------|----------|
| Q99JP7 | Gamma-glutamyltransferase 7 OS=Mus musculus GN=Ggt7 PE=1 SV=2                                      | 2.719033 | 1  | 3   | 1  | 70.208 | 5.06 | 1100000  | 820000   | 820000   | 7.308992 |
| Q9DC50 | Peroxisomal carnitine O-octanoyltransferase OS=Mus musculus GN=Crot PE=1 SV=1                      | 2.941176 | 1  | 1   | 1  | 70.219 | 6.73 |          | 490000   |          | 2.568528 |
| P19221 | Prothrombin OS=Mus musculus GN=F2 PE=1 SV=1                                                        | 9.87055  | 5  | 11  | 5  | 70.224 | 6.43 | 2400000  | 2900000  | 2600000  | 29.38406 |
| Q99K43 | Protein regulator of cytokinesis 1 OS=Mus musculus GN=Prc1 PE=1 SV=2                               | 6.633499 | 4  | 8   | 3  | 70.246 | 7.58 | 1100000  | 1300000  | 1000000  | 16.72253 |
| Q8BYY4 | Tetratricopeptide repeat protein 39B OS=Mus musculus GN=Ttc39b PE=1 SV=1                           | 1.296596 | 1  | 1   | 1  | 70.248 | 6.64 |          | 560000   |          | 2.116921 |
| Q99X7  | Nuclear RNA export factor 1 OS=Mus musculus GN=Nxf1 PE=1 SV=3                                      | 1.618123 | 1  | 1   | 1  | 70.256 | 8.73 |          | 1800000  |          | 2.738546 |
| P54729 | NEDD8 ultimate buster 1 OS=Mus musculus GN=Nub1 PE=1 SV=2                                          | 6.351792 | 3  | 6   | 3  | 70.263 | 5.88 | 2000000  | 2400000  | 920000   | 16.46148 |
| Q88428 | Bifunctional 3'-phosphoadenosine 5'-phosphosulfate synthase 2 OS=Mus musculus GN=Papss2 PE=1 SV=2  | 4.991948 | 3  | 5   | 3  | 70.306 | 7.58 | 1800000  | 1400000  | 1400000  | 11.96484 |
| Q6P9R1 | ATP-dependent RNA helicase DDX51 OS=Mus musculus GN=Ddx51 PE=1 SV=1                                | 13.14554 | 4  | 9   | 4  | 70.324 | 9.47 | 630000   | 650000   | 780000   | 26.23428 |
| Q64213 | Splicing factor 1 OS=Mus musculus GN=Sf1 PE=1 SV=6                                                 | 4.134763 | 3  | 9   | 3  | 70.358 | 8.98 | 4100000  | 3700000  | 1300000  | 28.80887 |
| Q8VCY6 | U3 small nucleolar RNA-associated protein 6 homolog OS=Mus musculus GN=Utp6 PE=2 SV=1              | 2.345059 | 1  | 3   | 1  | 70.384 | 7.71 | 880000   | 1000000  | 1200000  | 9.256124 |
| Q9JLQ0 | CD2-associated protein OS=Mus musculus GN=Cd2ap PE=1 SV=3                                          | 9.733124 | 4  | 6   | 4  | 70.407 | 6.38 | 1000000  | 1100000  | 1200000  | 17.59394 |
| P59016 | Vacuolar protein sorting-associated protein 33B OS=Mus musculus GN=Vps33b PE=1 SV=1                | 4.376013 | 2  | 4   | 2  | 70.481 | 6.86 | 1500000  | 890000   | 1300000  | 11.55695 |
| Q8BH04 | Phosphoenolpyruvate carboxykinase [GTP], mitochondrial OS=Mus musculus GN=Pck2 PE=1 SV=1           | 5.78125  | 3  | 5   | 3  | 70.482 | 7.28 | 1500000  | 890000   | 1300000  | 13.36866 |
| Q9Z1F9 | SUMO-activating enzyme subunit 2 OS=Mus musculus GN=Uba2 PE=1 SV=1                                 | 14.10658 | 6  | 10  | 6  | 70.525 | 5.24 | 3300000  | 4700000  | 1300000  | 32.664   |
| Q8BMA6 | Signal recognition particle subunit SRP68 OS=Mus musculus GN=Srp68 PE=1 SV=2                       | 30.56    | 15 | 32  | 15 | 70.53  | 8.57 | 6200000  | 4700000  | 5800000  | 90.84052 |
| Q5SVQ0 | Histone acetyltransferase KAT7 OS=Mus musculus GN=Kat7 PE=1 SV=1                                   | 4.893964 | 2  | 5   | 2  | 70.597 | 8.72 |          | 1400000  | 1400000  | 13.48823 |
| P29341 | Polyadenylate-binding protein 1 OS=Mus musculus GN=Pabpc1 PE=1 SV=2                                | 22.01258 | 13 | 39  | 13 | 70.626 | 9.5  | 17000000 | 14000000 | 14000000 | 109.3265 |
| Q99PG2 | Opioid growth factor receptor OS=Mus musculus GN=Ogfr PE=1 SV=1                                    | 23.5387  | 6  | 17  | 6  | 70.636 | 4.77 | 1600000  | 2400000  | 980000   | 56.50102 |
| Q924H7 | WW domain-containing adapter protein with coiled-coil OS=Mus musculus GN=Wac PE=1 SV=2             | 2.631579 | 1  | 1   | 1  | 70.637 | 9.45 |          | 1500000  |          | 3.443511 |
| Q88485 | Cytoplasmic dynein 1 intermediate chain 1 OS=Mus musculus GN=Dync1i1 PE=1 SV=2                     | 7.324841 | 3  | 6   | 3  | 70.681 | 5.12 | 610000   |          | 270000   | 18.70071 |
| Q7TNG5 | Echinoderm microtubule-associated protein-like 2 OS=Mus musculus GN=Emi2 PE=1 SV=1                 | 3.081664 | 2  | 3   | 2  | 70.689 | 6.28 | 1800000  | 710000   | 1500000  | 6.485986 |
| Q99K51 | Plastin-3 OS=Mus musculus GN=Pls3 PE=1 SV=3                                                        | 13.33333 | 6  | 13  | 4  | 70.697 | 5.62 | 1000000  | 1500000  | 1100000  | 38.07757 |
| Q60967 | Bifunctional 3'-phosphoadenosine 5'-phosphosulfate synthase 1 OS=Mus musculus GN=Papss1 PE=1 SV=1  | 3.205128 | 2  | 2   | 2  | 70.749 | 6.77 | 4000000  | 2100000  |          | 4.198499 |
| Q61107 | Guanylate-binding protein 4 OS=Mus musculus GN=Gbp4 PE=1 SV=1                                      | 16.12903 | 8  | 31  | 8  | 70.757 | 6.64 | 9500000  | 5900000  | 7600000  | 100.235  |
| P47934 | Carnitine O-acetyltransferase OS=Mus musculus GN=Crat PE=1 SV=3                                    | 1.916933 | 1  | 2   | 1  | 70.794 | 8.44 | 880000   |          | 540000   | 4.014158 |
| Q9JIG7 | Coiled-coil domain-containing protein 22 OS=Mus musculus GN=Ccdc22 PE=1 SV=1                       | 9.250399 | 4  | 6   | 4  | 70.8   | 6.01 | 560000   | 1100000  | 910000   | 16.96333 |
| P63017 | Heat shock cognate 71 kDa protein OS=Mus musculus GN=Hspa8 PE=1 SV=1                               | 60.21672 | 36 | 199 | 25 | 70.827 | 5.52 | 2.2E+08  | 1.7E+08  | 1.6E+08  | 635.9082 |
| P50544 | Very long-chain specific acyl-CoA dehydrogenase, mitochondrial OS=Mus musculus GN=Acadvl PE=1 SV=3 | 9.756098 | 5  | 9   | 5  | 70.831 | 8.75 | 3500000  | 1900000  | 2800000  | 27.27788 |
| Q6ZPU9 | KIF1-binding protein OS=Mus musculus GN=Kif1bp PE=1 SV=2                                           | 7.941653 | 2  | 4   | 2  | 71.007 | 5.48 | 1200000  | 380000   |          | 13.22271 |
| Q8K297 | Procollagen galactosyltransferase 1 OS=Mus musculus GN=Colgalt1 PE=1 SV=2                          | 10.69692 | 7  | 13  | 7  | 71.015 | 7.28 | 3000000  | 3200000  | 3300000  | 38.08342 |
| Q60714 | Long-chain fatty acid transport protein 1 OS=Mus musculus GN=Slc27a1 PE=1 SV=1                     | 5.727554 | 3  | 3   | 3  | 71.231 | 8.38 | 740000   | 670000   |          | 8.695629 |
| Q80TY0 | Formin-binding protein 1 OS=Mus musculus GN=Fbnp1 PE=1 SV=2                                        | 16.55844 | 7  | 11  | 7  | 71.299 | 5.67 | 1800000  | 2500000  | 1400000  | 24.93632 |
| Q8K2Q9 | Shootin-1 OS=Mus musculus GN=Shtn1 PE=1 SV=1                                                       | 3.169572 | 1  | 2   | 1  | 71.299 | 5.44 |          | 360000   | 490000   | 5.039536 |
| P48025 | Tyrosine-protein kinase SYK OS=Mus musculus GN=Syk PE=1 SV=2                                       | 1.90779  | 1  | 2   | 1  | 71.331 | 7.88 | 990000   | 870000   |          | 4.392788 |
| Q3U9G9 | Lamin-B receptor OS=Mus musculus GN=Lbr PE=1 SV=2                                                  | 15.17572 | 9  | 22  | 9  | 71.395 | 9.36 | 13000000 | 16000000 | 16000000 | 59.4906  |
| Q9R0L7 | A-kinase anchor protein 8-like OS=Mus musculus GN=Akap8l PE=1 SV=1                                 | 4.049844 | 2  | 4   | 2  | 71.408 | 5.05 | 2400000  | 1500000  | 1100000  | 12.71561 |
| Q8R349 | Cell division cycle protein 16 homolog OS=Mus musculus GN=Cdc16 PE=1 SV=1                          | 5.483871 | 3  | 7   | 3  | 71.414 | 5.76 | 1600000  | 1300000  | 1700000  | 20.3828  |
| Q7M6Y3 | Phosphatidylinositol-binding clathrin assembly protein OS=Mus musculus GN=Picalm PE=1 SV=1         | 3.333333 | 2  | 2   | 1  | 71.498 | 7.91 |          |          |          | 4.742513 |
| Q8R2Y2 | Cell surface glycoprotein MUC18 OS=Mus musculus GN=Mcam PE=1 SV=1                                  | 23.61111 | 12 | 35  | 12 | 71.501 | 5.83 | 21000000 | 20000000 | 9500000  | 115.9355 |
| Q8VDG3 | Poly(A)-specific ribonuclease PARN OS=Mus musculus GN=Parn PE=1 SV=1                               | 4.166667 | 2  | 6   | 2  | 71.514 | 5.97 | 2300000  | 2200000  | 2100000  | 19.16841 |
| P15092 | Interferon-activable protein 204 OS=Mus musculus GN=Ifi204 PE=1 SV=2                               | 19.21875 | 9  | 27  | 8  | 71.605 | 8.69 | 6000000  | 5400000  | 6000000  | 89.29941 |
| Q8C0I1 | Alkylidihydroxyacetonephosphate synthase, peroxisomal OS=Mus musculus GN=Agps PE=1 SV=1            | 7.44186  | 3  | 6   | 3  | 71.638 | 7.5  |          | 880000   | 1000000  | 16.87559 |
| P54103 | Dnal homolog subfamily C member 2 OS=Mus musculus GN=Dnajc2 PE=1 SV=2                              | 16.58615 | 8  | 15  | 8  | 71.677 | 8.7  | 2800000  | 3700000  | 3000000  | 41.72254 |
| Q61510 | E3 ubiquitin/ISG15 ligase TRIM25 OS=Mus musculus GN=Trim25 PE=1 SV=2                               | 6.309148 | 3  | 9   | 3  | 71.68  | 8.28 | 1400000  | 1400000  | 1400000  | 24.99367 |
| Q99LE6 | ATP-binding cassette sub-family F member 2 OS=Mus musculus GN=Abcf2 PE=1 SV=1                      | 9.713376 | 5  | 14  | 5  | 71.736 | 7.05 | 4900000  | 4800000  | 4800000  | 40.36081 |
| Q91XU0 | ATPase WRNIP1 OS=Mus musculus GN=Wrnip1 PE=1 SV=2                                                  | 1.969697 | 1  | 1   | 1  | 71.749 | 6.18 |          |          |          | 2.90282  |
| P08003 | Protein disulfide-isomerase A4 OS=Mus musculus GN=Pdia4 PE=1 SV=3                                  | 46.55172 | 24 | 87  | 24 | 71.938 | 5.31 | 35000000 | 37000000 | 32000000 | 274.6146 |
| Q8K3A9 | 7SK snRNA methylphosphate capping enzyme OS=Mus musculus GN=Mepce PE=1 SV=2                        | 8.858859 | 3  | 4   | 3  | 72.006 | 9.25 | 570000   | 1600000  |          | 14.74752 |
| Q8CH72 | E3 ubiquitin-protein ligase TRIM32 OS=Mus musculus GN=Trim32 PE=1 SV=2                             | 2.900763 | 2  | 4   | 2  | 72.011 | 6.9  | 2500000  | 4000000  | 750000   | 9.236437 |
| Q61550 | Double-strand-break repair protein rad21 homolog OS=Mus musculus GN=Rad21 PE=1 SV=3                | 17.00787 | 9  | 19  | 9  | 72.038 | 4.64 | 6500000  | 4400000  | 5100000  | 55.23701 |
| Q8BG51 | Mitochondrial Rho GTPase 1 OS=Mus musculus GN=Rhot1 PE=1 SV=1                                      | 5.388273 | 2  | 4   | 2  | 72.196 | 6.49 | 2700000  | 2200000  | 1600000  | 11.68743 |
| Q8CB44 | GRAM domain-containing protein 4 OS=Mus musculus GN=Gramd4 PE=1 SV=1                               | 4.739336 | 2  | 3   | 2  | 72.218 | 9.07 | 460000   | 300000   |          | 7.827994 |

|        |                                                                                                                      |          |    |     |    |        |      |          |          |          |          |
|--------|----------------------------------------------------------------------------------------------------------------------|----------|----|-----|----|--------|------|----------|----------|----------|----------|
| P70663 | SPARC-like protein 1 OS=Mus musculus GN=Sparcl1 PE=1 SV=3                                                            | 12.30769 | 5  | 17  | 5  | 72.243 | 4.6  | 2300000  | 4000000  | 890000   | 49.41711 |
| O08582 | GTP-binding protein 1 OS=Mus musculus GN=Gtpbp1 PE=1 SV=2                                                            | 3.592814 | 2  | 2   | 2  | 72.255 | 8.29 | 1300000  | 2100000  |          | 6.04075  |
| Q91VE0 | Long-chain fatty acid transport protein 4 OS=Mus musculus GN=Slc27a4 PE=1 SV=1                                       | 5.909798 | 3  | 4   | 3  | 72.272 | 8.59 | 1400000  | 2500000  | 1900000  | 10.94907 |
| Q8BRF7 | Sec1 family domain-containing protein 1 OS=Mus musculus GN=Scfd1 PE=1 SV=1                                           | 9.076682 | 4  | 10  | 4  | 72.277 | 6.38 | 4300000  | 4100000  | 3900000  | 33.29501 |
| Q501J6 | Probable ATP-dependent RNA helicase DDX17 OS=Mus musculus GN=Ddx17 PE=1 SV=1                                         | 36.92308 | 24 | 61  | 17 | 72.354 | 8.59 | 11000000 | 13000000 | 12000000 | 170.1901 |
| O70161 | Phosphatidylinositol 4-phosphate 5-kinase type-1 gamma OS=Mus musculus GN=Pip5k1c PE=1 SV=2                          | 4.236006 | 2  | 2   | 2  | 72.363 | 5.59 |          |          | 560000   | 5.80612  |
| Q8VCT3 | Aminopeptidase B OS=Mus musculus GN=Rnpep PE=1 SV=2                                                                  | 2.769231 | 1  | 2   | 1  | 72.37  | 5.35 | 1600000  | 950000   |          | 5.062127 |
| P20029 | 78 kDa glucose-regulated protein OS=Mus musculus GN=Hspa5 PE=1 SV=3                                                  | 49.46565 | 35 | 168 | 33 | 72.377 | 5.16 | 1.7E+08  | 1.7E+08  | 1.4E+08  | 553.8892 |
| Q9Z129 | ATP-dependent DNA helicase Q1 OS=Mus musculus GN=Recql PE=1 SV=2                                                     | 1.234568 | 1  | 3   | 1  | 72.438 | 8.34 | 750000   | 640000   | 590000   | 7.42008  |
| Q3UDW8 | Heparan-alpha-glucosaminide N-acetyltransferase OS=Mus musculus GN=Hgsnat PE=1 SV=2                                  | 3.658537 | 2  | 6   | 2  | 72.458 | 8.27 | 3700000  | 2600000  | 3200000  | 17.78651 |
| P97494 | Glutamate-cysteine ligase catalytic subunit OS=Mus musculus GN=Gclc PE=1 SV=4                                        | 2.825746 | 1  | 3   | 1  | 72.525 | 5.9  | 250000   |          | 540000   | 9.588662 |
| Q8K2B3 | Succinate dehydrogenase [ubiquinone] flavoprotein subunit, mitochondrial OS=Mus musculus GN=Sdha PE=1 SV=1           | 17.31928 | 9  | 20  | 9  | 72.539 | 7.37 | 14000000 | 9600000  | 10000000 | 60.20595 |
| Q7TQK5 | Coiled-coil domain-containing protein 93 OS=Mus musculus GN=Ccdc93 PE=1 SV=1                                         | 5.246423 | 3  | 4   | 3  | 72.558 | 8.29 | 1500000  |          | 1500000  | 8.415634 |
| Q60710 | Deoxynucleoside triphosphate triphosphohydrolase SAMHD1 OS=Mus musculus GN=Samhd1 PE=1 SV=2                          | 37.32057 | 20 | 57  | 20 | 72.604 | 7.96 | 27000000 | 27000000 | 22000000 | 155.5017 |
| Q8CH02 | SURP and G-patch domain-containing protein 1 OS=Mus musculus GN=Supg1 PE=1 SV=1                                      | 5.132193 | 2  | 4   | 2  | 72.604 | 7.64 |          | 740000   | 730000   | 11.44961 |
| Q8CIG8 | Protein arginine N-methyltransferase 5 OS=Mus musculus GN=Prmt5 PE=1 SV=3                                            | 6.122449 | 3  | 5   | 3  | 72.634 | 6.42 | 670000   | 1600000  | 1300000  | 11.43522 |
| Q8BKS9 | Pumilio homolog 3 OS=Mus musculus GN=Pum3 PE=1 SV=2                                                                  | 5.718702 | 4  | 10  | 4  | 72.754 | 9.66 | 2000000  | 1900000  | 1700000  | 20.60344 |
| O08688 | Calpain-5 OS=Mus musculus GN=Capn5 PE=1 SV=1                                                                         | 1.71875  | 1  | 1   | 1  | 72.909 | 7.36 | 1300000  |          |          | 2.021188 |
| O70551 | SRSF protein kinase 1 OS=Mus musculus GN=Srpk1 PE=1 SV=2                                                             | 8.641975 | 4  | 5   | 3  | 73.043 | 6.19 |          | 2400000  | 1900000  | 14.12841 |
| Q62167 | ATP-dependent RNA helicase DDX3X OS=Mus musculus GN=Ddx3x PE=1 SV=3                                                  | 19.78852 | 12 | 34  | 1  | 73.056 | 7.18 | 1900000  | 800000   | 910000   | 97.68412 |
| O08677 | Kininogen-1 OS=Mus musculus GN=Kng1 PE=1 SV=1                                                                        | 7.564297 | 4  | 8   | 4  | 73.056 | 6.54 | 1800000  | 1600000  | 1400000  | 25.52272 |
| Q9R049 | E3 ubiquitin-protein ligase AMFR OS=Mus musculus GN=Amfr PE=1 SV=2                                                   | 2.332815 | 1  | 3   | 1  | 73.058 | 6.46 | 970000   | 1100000  | 1300000  | 6.910671 |
| Q3TWF6 | WD repeat-containing protein 70 OS=Mus musculus GN=Wdr70 PE=1 SV=1                                                   | 2.283105 | 1  | 2   | 1  | 73.073 | 5.97 | 1100000  | 1300000  |          | 6.361663 |
| Q3UM18 | Large subunit GTPase 1 homolog OS=Mus musculus GN=Lsg1 PE=1 SV=2                                                     | 3.726708 | 2  | 3   | 2  | 73.111 | 6.51 |          | 920000   | 890000   | 7.846689 |
| Q8BYW1 | Rho GTPase-activating protein 25 OS=Mus musculus GN=Arhgap25 PE=1 SV=2                                               | 4.783951 | 1  | 1   | 1  | 73.337 | 6.38 |          | 990000   |          | 3.985105 |
| Q8CEC6 | Peptidylprolyl isomerase domain and WD repeat-containing protein 1 OS=Mus musculus GN=Ppwd1 PE=1 SV=2                | 5.882353 | 2  | 4   | 2  | 73.338 | 7.15 | 3200000  | 3000000  | 1500000  | 14.24641 |
| Q62095 | ATP-dependent RNA helicase DDX3Y OS=Mus musculus GN=Ddx3y PE=1 SV=2                                                  | 19.75684 | 12 | 32  | 1  | 73.382 | 7.53 | 470000   |          |          | 92.12945 |
| A2ALS5 | Rap1 GTPase-activating protein 1 OS=Mus musculus GN=Rap1gap PE=1 SV=2                                                | 4.223228 | 2  | 4   | 2  | 73.387 | 5.87 | 1400000  | 1400000  | 690000   | 11.1983  |
| P38647 | Stress-70 protein, mitochondrial OS=Mus musculus GN=Hspa9 PE=1 SV=3                                                  | 39.17526 | 23 | 75  | 23 | 73.416 | 6.07 | 26000000 | 23000000 | 20000000 | 241.1181 |
| Q00780 | Collagen alpha-1(VIII) chain OS=Mus musculus GN=Col8a1 PE=1 SV=3                                                     | 1.747312 | 1  | 2   | 1  | 73.559 | 9.55 |          | 1500000  | 620000   | 4.096906 |
| O88845 | A-kinase anchor protein 10, mitochondrial OS=Mus musculus GN=Akap10 PE=1 SV=3                                        | 2.416918 | 1  | 1   | 1  | 73.586 | 6.79 | 780000   |          |          | 2.865756 |
| Q9WVR4 | Fragile X mental retardation syndrome-related protein 2 OS=Mus musculus GN=Fxr2 PE=1 SV=1                            | 8.618128 | 5  | 12  | 4  | 73.698 | 6.23 | 2800000  | 2800000  | 2100000  | 37.45636 |
| Q35492 | Dual specificity protein kinase CLK3 OS=Mus musculus GN=Clk3 PE=1 SV=2                                               | 2.037618 | 1  | 2   | 1  | 73.751 | 9.94 | 520000   | 550000   |          | 4.289148 |
| Q8K3G9 | DCC-interacting protein 13-beta OS=Mus musculus GN=App12 PE=1 SV=1                                                   | 2.114804 | 1  | 1   | 1  | 73.807 | 5.03 | 560000   |          |          | 2.886931 |
| Q91WC9 | Sn1-specific diacylglycerol lipase beta OS=Mus musculus GN=Daglb PE=1 SV=2                                           | 2.541106 | 1  | 2   | 1  | 73.857 | 6.73 |          | 670000   | 590000   | 4.869922 |
| D3Z7P3 | Glutaminase kidney isoform, mitochondrial OS=Mus musculus GN=Gls PE=1 SV=1                                           | 8.902077 | 4  | 9   | 4  | 73.916 | 7.99 | 2800000  | 5000000  | 3500000  | 29.12795 |
| P52825 | Carnitine O-palmitoyltransferase 2, mitochondrial OS=Mus musculus GN=Cpt2 PE=1 SV=2                                  | 3.951368 | 2  | 2   | 2  | 73.934 | 8.37 | 600000   |          |          | 4.807206 |
| Q88665 | Bromodomain-containing protein 7 OS=Mus musculus GN=Brd7 PE=1 SV=1                                                   | 1.843318 | 1  | 2   | 1  | 73.954 | 6.38 | 390000   |          | 620000   | 5.414691 |
| Q9D706 | RNA polymerase II-associated protein 3 OS=Mus musculus GN=Rpap3 PE=1 SV=1                                            | 7.424242 | 4  | 8   | 4  | 74.05  | 7.99 | 1600000  | 1400000  | 1100000  | 26.8281  |
| O88935 | Synapsin-1 OS=Mus musculus GN=Syn1 PE=1 SV=2                                                                         | 25.21246 | 12 | 37  | 11 | 74.052 | 9.8  | 15000000 | 6700000  | 5100000  | 113.9565 |
| Q99ME9 | Nucleolar GTP-binding protein 1 OS=Mus musculus GN=Gtpbp4 PE=1 SV=3                                                  | 11.19874 | 7  | 15  | 7  | 74.066 | 9.52 | 2900000  | 4100000  | 2600000  | 36.53604 |
| Q9QWT9 | Kinesin-like protein KIFC1 OS=Mus musculus GN=Kifc1 PE=1 SV=2                                                        | 2.077151 | 1  | 3   | 1  | 74.107 | 8.72 | 1000000  | 1100000  | 950000   | 9.540281 |
| Q8K363 | ATP-dependent RNA helicase DDX18 OS=Mus musculus GN=Ddx18 PE=1 SV=1                                                  | 19.69697 | 8  | 23  | 8  | 74.134 | 9.52 | 4700000  | 5300000  | 4900000  | 80.89988 |
| P48678 | Prelamin-A/C OS=Mus musculus GN=Lmna PE=1 SV=2                                                                       | 53.23308 | 35 | 119 | 34 | 74.193 | 6.98 | 32000000 | 36000000 | 31000000 | 335.8477 |
| Q3UMU9 | Hepatoma-derived growth factor-related protein 2 OS=Mus musculus GN=Hdgrp2 PE=1 SV=1                                 | 3.28849  | 2  | 6   | 2  | 74.246 | 8.66 | 7600000  | 7600000  | 6800000  | 17.25995 |
| Q62192 | CD180 antigen OS=Mus musculus GN=Cd180 PE=1 SV=2                                                                     | 2.420575 | 1  | 3   | 1  | 74.255 | 5.88 | 7500000  | 7500000  | 4900000  | 11.99613 |
| Q8R5A3 | Amyloid beta A4 precursor protein-binding family B member 1-interacting protein OS=Mus musculus GN=Apbb1ip PE=1 SV=2 | 2.835821 | 2  | 5   | 2  | 74.272 | 5.35 | 1500000  | 1800000  | 1000000  | 10.02568 |
| P11370 | Retrovirus-related Env polyprotein from Fv-4 locus OS=Mus musculus GN=Fv4 PE=1 SV=2                                  | 8.247423 | 4  | 14  | 2  | 74.406 | 7.81 | 1600000  | 1900000  | 990000   | 42.77931 |
| Q9QXX4 | Calcium-binding mitochondrial carrier protein Aralar2 OS=Mus musculus GN=Slc25a13 PE=1 SV=1                          | 3.402367 | 3  | 5   | 1  | 74.42  | 8.6  | 800000   |          | 1000000  | 11.58008 |
| Q8BH59 | Calcium-binding mitochondrial carrier protein Aralar1 OS=Mus musculus GN=Slc25a12 PE=1 SV=1                          | 15.06647 | 10 | 19  | 8  | 74.523 | 8.25 | 8200000  | 5600000  | 5200000  | 51.68012 |
| P82198 | Transforming growth factor-beta-induced protein ig-h3 OS=Mus musculus GN=Tgfb1 PE=1 SV=1                             | 25.18302 | 15 | 43  | 15 | 74.55  | 7.06 | 22000000 | 22000000 | 22000000 | 130.5283 |
| Q9R0H0 | Peroxisomal acyl-coenzyme A oxidase 1 OS=Mus musculus GN=Acox1 PE=1 SV=5                                             | 2.269289 | 1  | 2   | 1  | 74.601 | 8.48 | 1400000  |          | 530000   | 5.687672 |
| Q8BH24 | Transmembrane 9 superfamily member 4 OS=Mus musculus GN=Tm9sf4 PE=1 SV=1                                             | 5.287714 | 2  | 6   | 2  | 74.644 | 7.23 | 3500000  | 3400000  | 3600000  | 20.02067 |



|        |                                                                                                     |          |    |    |    |        |      |          |          |          |          |
|--------|-----------------------------------------------------------------------------------------------------|----------|----|----|----|--------|------|----------|----------|----------|----------|
| Q8R480 | Nuclear pore complex protein Nup85 OS=Mus musculus GN=Nup85 PE=1 SV=1                               | 5.182927 | 3  | 7  | 3  | 74.728 | 5.57 | 2000000  | 1500000  | 1600000  | 18.15418 |
| Q0VEE6 | Zinc finger protein 800 OS=Mus musculus GN=Znf800 PE=1 SV=1                                         | 3.47432  | 1  | 1  | 1  | 74.767 | 9.42 |          | 1000000  |          | 3.563832 |
| Q8K0U4 | Heat shock 70 kDa protein 12A OS=Mus musculus GN=Hspa12a PE=1 SV=1                                  | 11.25926 | 6  | 14 | 6  | 74.825 | 6.77 | 3700000  | 1700000  | 1900000  | 42.97478 |
| Q77QF7 | Amphiphysin OS=Mus musculus GN=Amph PE=1 SV=1                                                       | 15.01458 | 8  | 20 | 7  | 74.967 | 4.63 | 6000000  | 3100000  | 3100000  | 63.67389 |
| Q9R190 | Metastasis-associated protein MTA2 OS=Mus musculus GN=Mta2 PE=1 SV=1                                | 11.82635 | 7  | 16 | 7  | 74.983 | 9.67 | 6100000  | 6300000  | 6000000  | 45.88993 |
| Q62172 | RalA-binding protein 1 OS=Mus musculus GN=Ralbp1 PE=1 SV=4                                          | 5.092593 | 3  | 3  | 3  | 74.997 | 5.92 | 450000   |          | 1800000  | 7.314363 |
| Q61033 | Lamina-associated polypeptide 2, isoforms alpha/zeta OS=Mus musculus GN=Tmpe PE=1 SV=4              | 26.40693 | 14 | 37 | 6  | 75.122 | 8.05 | 6800000  | 6700000  | 6800000  | 123.5567 |
| Q8VBZ3 | Cleft lip and palate transmembrane protein 1 homolog OS=Mus musculus GN=Clptm1 PE=1 SV=1            | 14.60843 | 5  | 17 | 5  | 75.243 | 6.3  | 3500000  | 4200000  | 3800000  | 61.53916 |
| P58021 | Transmembrane 9 superfamily member 2 OS=Mus musculus GN=Tm9sf2 PE=1 SV=1                            | 6.797583 | 3  | 9  | 3  | 75.28  | 7.43 | 4300000  | 3700000  | 5000000  | 25.83344 |
| Q6ZQL4 | WD repeat-containing protein 43 OS=Mus musculus GN=Wdr43 PE=2 SV=2                                  | 6.351551 | 3  | 5  | 3  | 75.334 | 5.38 | 4400000  | 1100000  | 2900000  | 15.66799 |
| Q8VIJ6 | Splicing factor, proline- and glutamine-rich OS=Mus musculus GN=Sfpq PE=1 SV=1                      | 26.32332 | 18 | 68 | 17 | 75.394 | 9.44 | 21000000 | 18000000 | 18000000 | 193.5578 |
| P55096 | ATP-binding cassette sub-family D member 3 OS=Mus musculus GN=Abcd3 PE=1 SV=2                       | 4.400607 | 2  | 3  | 2  | 75.426 | 9.26 | 2500000  |          | 4100000  | 8.564005 |
| P47708 | Rabphilin-3A OS=Mus musculus GN=Rph3a PE=1 SV=2                                                     | 4.845815 | 2  | 4  | 2  | 75.442 | 8.27 | 1700000  | 140000   | 660000   | 14.04901 |
| Q5XJE5 | RNA polymerase-associated protein LEO1 OS=Mus musculus GN=Leo1 PE=1 SV=2                            | 1.949025 | 1  | 3  | 1  | 75.552 | 4.46 | 2800000  | 2600000  | 2300000  | 7.28491  |
| Q8K1B8 | Fermitin family homolog 3 OS=Mus musculus GN=Fermt3 PE=1 SV=1                                       | 14.73684 | 8  | 19 | 8  | 75.587 | 7.05 | 8800000  | 8200000  | 7900000  | 57.16056 |
| Q5F2E7 | Nuclear fragile X mental retardation-interacting protein 2 OS=Mus musculus GN=Nufip2 PE=1 SV=1      | 11.41618 | 5  | 8  | 5  | 75.611 | 8.7  | 1000000  | 1100000  | 1000000  | 20.87893 |
| Q9D0I9 | Arginine--tRNA ligase, cytoplasmic OS=Mus musculus GN=Rars PE=1 SV=2                                | 18.48485 | 11 | 28 | 11 | 75.625 | 7.55 | 4400000  | 6900000  | 6100000  | 73.52556 |
| P14824 | Annexin A6 OS=Mus musculus GN=Anxa6 PE=1 SV=3                                                       | 48.88559 | 28 | 87 | 27 | 75.837 | 5.5  | 28000000 | 22000000 | 23000000 | 281.1846 |
| Q60649 | Caseinolytic peptidase B protein homolog OS=Mus musculus GN=Clpb PE=1 SV=1                          | 1.624815 | 1  | 1  | 1  | 75.956 | 8.51 |          |          |          | 2.731215 |
| Q8K2C7 | Protein OS-9 OS=Mus musculus GN=Os9 PE=1 SV=2                                                       | 7.291667 | 4  | 6  | 4  | 76.061 | 4.84 | 2000000  | 710000   | 1000000  | 15.79398 |
| Q8JZR0 | Long-chain-fatty-acid--CoA ligase 5 OS=Mus musculus GN=Acsl5 PE=1 SV=1                              | 10.2489  | 6  | 14 | 5  | 76.157 | 7.09 | 2000000  | 2200000  | 1200000  | 37.75358 |
| Q61584 | Fragile X mental retardation syndrome-related protein 1 OS=Mus musculus GN=Fx1 PE=1 SV=2            | 23.33826 | 11 | 26 | 10 | 76.175 | 6.98 | 6700000  | 6000000  | 9100000  | 84.9186  |
| P10637 | Microtubule-associated protein tau OS=Mus musculus GN=Mapt PE=1 SV=3                                | 11.05048 | 5  | 9  | 5  | 76.197 | 6.79 | 3000000  | 2300000  | 9700000  | 21.85454 |
| Q9DBR0 | A-kinase anchor protein 8 OS=Mus musculus GN=Akap8 PE=1 SV=1                                        | 3.930131 | 2  | 5  | 2  | 76.247 | 5.14 | 2500000  | 3000000  | 3200000  | 15.00105 |
| Q9CXF4 | TBC1 domain family member 15 OS=Mus musculus GN=Tbc1d15 PE=1 SV=1                                   | 7.451565 | 4  | 8  | 4  | 76.478 | 5.3  | 1500000  | 1600000  | 1800000  | 20.30746 |
| P28571 | Sodium- and chloride-dependent glycine transporter 1 OS=Mus musculus GN=Slc6a9 PE=1 SV=3            | 3.179191 | 1  | 3  | 1  | 76.494 | 7.81 | 3500000  | 2400000  | 2300000  | 9.234369 |
| Q501J7 | Phosphatase and actin regulator 4 OS=Mus musculus GN=Phactr4 PE=1 SV=2                              | 1.873199 | 1  | 1  | 1  | 76.585 | 6.48 | 600000   |          |          | 2.772363 |
| Q8R3L2 | Transcription factor 25 OS=Mus musculus GN=Tcf25 PE=1 SV=2                                          | 4.43787  | 2  | 2  | 2  | 76.637 | 6.51 | 700000   | 310000   |          | 4.289427 |
| Q99J87 | Probable ATP-dependent RNA helicase DHX58 OS=Mus musculus GN=Dhx58 PE=1 SV=2                        | 4.719764 | 3  | 5  | 3  | 76.66  | 8.19 | 1900000  | 940000   | 1300000  | 13.43102 |
| Q921I1 | Serotransferrin OS=Mus musculus GN=Tf PE=1 SV=1                                                     | 27.83357 | 16 | 43 | 16 | 76.674 | 7.18 | 14000000 | 5000000  | 11000000 | 126.2833 |
| Q3THK7 | GMP synthase [glutamine-hydrolyzing] OS=Mus musculus GN=Gmps PE=1 SV=2                              | 6.926407 | 4  | 7  | 4  | 76.675 | 6.73 | 2300000  | 1800000  | 2000000  | 17.91591 |
| P09405 | Nucleolin OS=Mus musculus GN=Ncl PE=1 SV=2                                                          | 30.55163 | 20 | 76 | 20 | 76.677 | 4.75 | 1.1E+08  | 1.2E+08  | 1.1E+08  | 218.3934 |
| P68404 | Protein kinase C beta type OS=Mus musculus GN=Prkcb PE=1 SV=4                                       | 14.00894 | 7  | 17 | 6  | 76.701 | 7.01 | 6400000  | 2800000  | 1400000  | 47.00786 |
| O54781 | SRSF protein kinase 2 OS=Mus musculus GN=Srp2 PE=1 SV=2                                             | 7.929515 | 5  | 11 | 4  | 76.709 | 4.91 | 2400000  | 2400000  | 2600000  | 31.11818 |
| Q3U0V1 | Far upstream element-binding protein 2 OS=Mus musculus GN=Khsrp PE=1 SV=2                           | 16.84492 | 8  | 15 | 7  | 76.728 | 7.33 | 2700000  | 2400000  | 2500000  | 41.24192 |
| Q8BXA1 | Golgi integral membrane protein 4 OS=Mus musculus GN=Golim4 PE=1 SV=1                               | 16.18321 | 6  | 12 | 6  | 76.739 | 4.83 | 150000   | 2800000  | 1300000  | 37.47701 |
| Q9QYY0 | GRB2-associated-binding protein 1 OS=Mus musculus GN=Gab1 PE=1 SV=2                                 | 1.870504 | 1  | 1  | 1  | 76.764 | 5.67 | 340000   |          |          | 2.896545 |
| Q6P9S0 | MTSS1-like protein OS=Mus musculus GN=Mtss1 PE=1 SV=1                                               | 1.958042 | 1  | 1  | 1  | 76.797 | 6.99 |          | 650000   |          | 2.189593 |
| P20444 | Protein kinase C alpha type OS=Mus musculus GN=Prkca PE=1 SV=3                                      | 6.25     | 3  | 5  | 1  | 76.802 | 7.14 | 370000   |          |          | 16.03667 |
| Q8R2N2 | U3 small nucleolar RNA-associated protein 4 homolog OS=Mus musculus GN=Utp4 PE=2 SV=3               | 2.332362 | 2  | 3  | 2  | 76.861 | 8.87 |          |          | 1500000  | 6.120466 |
| Q6NZQ2 | Probable ATP-dependent RNA helicase DDX31 OS=Mus musculus GN=Ddx31 PE=2 SV=2                        | 1.310044 | 1  | 2  | 1  | 76.865 | 9.74 |          | 430000   | 410000   | 4.034906 |
| Q9Z2Z9 | Glutamine--fructose-6-phosphate aminotransferase [isomerizing] 2 OS=Mus musculus GN=Gfpt2 PE=1 SV=3 | 3.372434 | 2  | 5  | 1  | 76.96  | 7.15 | 2000000  | 1800000  | 1400000  | 14.5336  |
| P37040 | NADPH--cytochrome P450 reductase OS=Mus musculus GN=Por PE=1 SV=2                                   | 10.76696 | 6  | 11 | 6  | 76.995 | 5.53 | 2700000  | 2900000  | 3600000  | 27.84718 |
| P21981 | Protein-glutamine gamma-glutamyltransferase 2 OS=Mus musculus GN=Tgm2 PE=1 SV=4                     | 42.5656  | 23 | 79 | 23 | 77.012 | 5.1  | 86000000 | 92000000 | 84000000 | 231.8561 |
| Q9QXS6 | Drebrin OS=Mus musculus GN=Dbrn1 PE=1 SV=4                                                          | 19.97167 | 8  | 21 | 8  | 77.239 | 4.49 | 8600000  | 6700000  | 5000000  | 69.31745 |
| Q08189 | Protein-glutamine gamma-glutamyltransferase E OS=Mus musculus GN=Tgm3 PE=1 SV=2                     | 1.875902 | 1  | 1  | 1  | 77.261 | 6.81 |          |          | 3900000  | 2.667471 |
| P36371 | Antigen peptide transporter 2 OS=Mus musculus GN=Tap2 PE=1 SV=1                                     | 19.80057 | 13 | 41 | 13 | 77.396 | 7.24 | 23000000 | 33000000 | 28000000 | 128.8006 |
| Q8BG39 | Synaptic vesicle glycoprotein 2B OS=Mus musculus GN=Syv2b PE=1 SV=1                                 | 6.881406 | 4  | 7  | 4  | 77.406 | 5.57 | 7300000  | 4400000  | 3800000  | 21.1649  |
| Q922U1 | U4/U6 small nuclear ribonucleoprotein Prp3 OS=Mus musculus GN=Prpf3 PE=1 SV=1                       | 2.928258 | 2  | 3  | 2  | 77.407 | 9.5  | 3300000  | 3200000  | 3200000  | 5.921993 |
| Q9QXK7 | Cleavage and polyadenylation specificity factor subunit 3 OS=Mus musculus GN=Cpsf3 PE=1 SV=2        | 2.923977 | 2  | 4  | 2  | 77.455 | 5.6  | 1600000  | 1200000  | 1900000  | 9.745456 |
| Q9D906 | Ubiquitin-like modifier-activating enzyme ATG7 OS=Mus musculus GN=Atg7 PE=1 SV=1                    | 1.719198 | 1  | 2  | 1  | 77.47  | 6.4  | 570000   |          | 350000   | 4.925999 |
| P70302 | Stromal interaction molecule 1 OS=Mus musculus GN=Stim1 PE=1 SV=2                                   | 5.839416 | 2  | 3  | 2  | 77.518 | 6.54 | 1500000  | 1900000  |          | 11.29958 |
| Q9D0E1 | Heterogeneous nuclear ribonucleoprotein M OS=Mus musculus GN=Hnrpm PE=1 SV=3                        | 32.92181 | 20 | 85 | 20 | 77.597 | 8.63 | 26000000 | 27000000 | 27000000 | 249.4814 |

|        |                                                                                                        |          |    |    |    |        |      |          |          |          |          |
|--------|--------------------------------------------------------------------------------------------------------|----------|----|----|----|--------|------|----------|----------|----------|----------|
| Q8BY02 | NF-kappa-B-repressing factor OS=Mus musculus GN=Nkrf PE=2 SV=3                                         | 1.15942  | 1  | 1  | 1  | 77.69  | 8.97 |          |          | 440000   | 2.357163 |
| Q14C51 | Pentatricopeptide repeat domain-containing protein 3, mitochondrial OS=Mus musculus GN=Ptcd3 PE=1 SV=2 | 2.335766 | 1  | 1  | 1  | 77.747 | 5.88 | 790000   |          |          | 3.380072 |
| Q8CIB5 | Fermitin family homolog 2 OS=Mus musculus GN=Fermt2 PE=1 SV=1                                          | 8.235294 | 5  | 11 | 5  | 77.751 | 6.7  | 4200000  | 3700000  | 4300000  | 30.68808 |
| P53351 | Serine/threonine-protein kinase PLK2 OS=Mus musculus GN=Plk2 PE=1 SV=1                                 | 3.812317 | 1  | 1  | 1  | 77.762 | 8.24 |          | 230000   |          | 2.366941 |
| P41216 | Long-chain-fatty-acid--CoA ligase 1 OS=Mus musculus GN=Acs1 PE=1 SV=2                                  | 5.722461 | 4  | 10 | 3  | 77.901 | 7.15 | 1200000  | 1200000  | 1300000  | 25.33738 |
| Q80U04 | E3 ubiquitin-protein ligase Praja-2 OS=Mus musculus GN=Pja2 PE=1 SV=2                                  | 3.253182 | 1  | 1  | 1  | 77.91  | 4.44 |          |          |          | 2.915702 |
| Q91WC3 | Long-chain-fatty-acid--CoA ligase 6 OS=Mus musculus GN=Acs6 PE=1 SV=1                                  | 1.578192 | 1  | 1  | 1  | 77.967 | 7.34 | 630000   |          |          | 2.511362 |
| Q8C1A5 | Thimet oligopeptidase OS=Mus musculus GN=Thop1 PE=1 SV=1                                               | 2.765648 | 1  | 3  | 1  | 77.976 | 6.06 | 210000   | 1800000  | 1600000  | 11.89054 |
| Q08879 | Fibulin-1 OS=Mus musculus GN=Fbln1 PE=1 SV=2                                                           | 12.34043 | 6  | 13 | 6  | 77.981 | 5.16 | 2100000  | 2000000  | 1300000  | 40.78193 |
| Q60865 | Caprin-1 OS=Mus musculus GN=Caprin1 PE=1 SV=2                                                          | 16.5488  | 8  | 23 | 8  | 78.121 | 5.25 | 16000000 | 15000000 | 12000000 | 80.76087 |
| Q8R550 | SH3 domain-containing kinase-binding protein 1 OS=Mus musculus GN=Sh3kbp1 PE=1 SV=1                    | 21.01551 | 10 | 18 | 10 | 78.122 | 7.55 | 3300000  | 2800000  | 1900000  | 56.84227 |
| Q80VY9 | Putative ATP-dependent RNA helicase DHX33 OS=Mus musculus GN=Dhx33 PE=1 SV=1                           | 2.005731 | 1  | 2  | 1  | 78.297 | 8.94 |          | 410000   | 460000   | 4.872038 |
| P63318 | Protein kinase C gamma type OS=Mus musculus GN=Prkcg PE=1 SV=1                                         | 13.62984 | 6  | 9  | 5  | 78.307 | 7.46 | 3500000  | 1300000  | 2100000  | 31.27484 |
| A11314 | Macrophage-expressed gene 1 protein OS=Mus musculus GN=Mpeg1 PE=1 SV=1                                 | 2.664797 | 1  | 1  | 1  | 78.34  | 5.92 |          |          | 900000   | 2.915333 |
| P57716 | Nicastrin OS=Mus musculus GN=Ncstn PE=1 SV=3                                                           | 3.248588 | 2  | 4  | 2  | 78.443 | 6.09 | 1900000  |          | 1300000  | 9.550573 |
| P47856 | Glutamine--fructose-6-phosphate aminotransferase [isomerizing] 1 OS=Mus musculus GN=Gfpt1 PE=1 SV=3    | 10.47346 | 6  | 13 | 5  | 78.489 | 6.84 | 4900000  | 4900000  | 4000000  | 36.78134 |
| Q9ESJ4 | NCK-interacting protein with SH3 domain OS=Mus musculus GN=Nckipsd PE=1 SV=2                           | 2.10084  | 1  | 1  | 1  | 78.523 | 6.05 | 250000   |          |          | 2.70954  |
| Q8BKT7 | THO complex subunit 5 homolog OS=Mus musculus GN=Thoc5 PE=1 SV=2                                       | 2.196193 | 1  | 3  | 1  | 78.636 | 7.12 | 1100000  | 890000   | 1200000  | 8.87803  |
| Q810V0 | E3 small nucleolar ribonucleoprotein protein MPP10 OS=Mus musculus GN=Mphosph10 PE=1 SV=2              | 6.314244 | 3  | 6  | 3  | 78.687 | 4.87 | 1400000  | 900000   | 1700000  | 16.85274 |
| Q91YR5 | Methyltransferase-like protein 13 OS=Mus musculus GN=Mettl13 PE=1 SV=1                                 | 1.432665 | 1  | 3  | 1  | 78.707 | 6.83 | 1400000  | 1100000  | 780000   | 6.7117   |
| Q9JLQ2 | ARF GTPase-activating protein GIT2 OS=Mus musculus GN=Git2 PE=1 SV=2                                   | 7.768362 | 4  | 8  | 4  | 78.717 | 7.72 | 900000   | 1300000  | 1100000  | 22.91591 |
| Q9QYB5 | Gamma-adducin OS=Mus musculus GN=Add3 PE=1 SV=2                                                        | 12.03966 | 7  | 15 | 7  | 78.728 | 5.95 | 2600000  | 1700000  | 1500000  | 43.86063 |
| P21958 | Antigen peptide transporter 1 OS=Mus musculus GN=Tap1 PE=1 SV=3                                        | 22.51381 | 15 | 47 | 15 | 78.814 | 8.79 | 25000000 | 29000000 | 30000000 | 135.732  |
| Q9Z0E0 | Neurochondrin OS=Mus musculus GN=Ncdn PE=1 SV=1                                                        | 7.407407 | 5  | 7  | 5  | 78.845 | 5.54 | 2800000  | 1700000  | 2000000  | 19.44297 |
| Q9QUJ7 | Long-chain-fatty-acid--CoA ligase 4 OS=Mus musculus GN=Acs4 PE=1 SV=2                                  | 6.751055 | 4  | 7  | 3  | 79.026 | 8.28 | 1400000  |          | 1000000  | 18.59417 |
| Q3UZ39 | Leucine-rich repeat flightless-interacting protein 1 OS=Mus musculus GN=Lrrfip1 PE=1 SV=2              | 12.34568 | 5  | 9  | 5  | 79.201 | 4.82 | 1100000  | 1200000  | 1400000  | 30.05757 |
| Q8K3H0 | DCC-interacting protein 13-alpha OS=Mus musculus GN=Appl1 PE=1 SV=1                                    | 1.55587  | 1  | 1  | 1  | 79.278 | 5.41 | 1400000  |          |          | 2.385106 |
| Q99MR8 | Methylcrotonoyl-CoA carboxylase subunit alpha, mitochondrial OS=Mus musculus GN=Mccc1 PE=1 SV=2        | 2.09205  | 1  | 1  | 1  | 79.293 | 7.83 | 500000   |          |          | 1.988329 |
| Q9CW46 | Ribonucleoprotein PTB-binding 1 OS=Mus musculus GN=Raver1 PE=1 SV=2                                    | 12.70053 | 5  | 9  | 5  | 79.333 | 8.72 | 1700000  | 1600000  | 1400000  | 26.87974 |
| D3YVFO | A-kinase anchor protein 5 OS=Mus musculus GN=Akap5 PE=1 SV=2                                           | 17.31544 | 2  | 3  | 2  | 79.35  | 4.75 |          | 2000000  | 1100000  | 13.24835 |
| P51660 | Peroxisomal multifunctional enzyme type 2 OS=Mus musculus GN=Hsd17b4 PE=1 SV=3                         | 10.34014 | 6  | 14 | 6  | 79.432 | 8.57 | 4100000  | 5500000  | 5700000  | 41.73706 |
| Q80V11 | E3 ubiquitin-protein ligase TRIM56 OS=Mus musculus GN=Trim56 PE=1 SV=1                                 | 8.446866 | 4  | 7  | 4  | 79.463 | 7.96 | 1000000  | 1900000  | 760000   | 20.20135 |
| Q80U22 | Protein SDA1 homolog OS=Mus musculus GN=Sdad1 PE=1 SV=1                                                | 4.657933 | 3  | 7  | 3  | 79.508 | 9.2  | 1700000  | 1600000  | 1900000  | 15.98673 |
| Q99MK8 | Beta-adrenergic receptor kinase 1 OS=Mus musculus GN=Adrbk1 PE=1 SV=2                                  | 4.354136 | 2  | 4  | 2  | 79.588 | 7.28 | 810000   | 890000   | 1600000  | 10.05059 |
| Q91VX9 | Transmembrane protein 168 OS=Mus musculus GN=Tmem168 PE=1 SV=1                                         | 2.439024 | 1  | 3  | 1  | 79.621 | 7.96 | 1000000  | 1100000  |          | 8.917758 |
| P28740 | Kinesin-like protein KIF2A OS=Mus musculus GN=Kif2a PE=1 SV=2                                          | 8.368794 | 5  | 12 | 5  | 79.707 | 6.73 | 3200000  | 2400000  | 2200000  | 30.79898 |
| Q8K2F0 | Bromodomain-containing protein 3 OS=Mus musculus GN=Brd3 PE=1 SV=2                                     | 1.790634 | 1  | 1  | 1  | 79.712 | 9.36 |          | 940000   |          | 3.057413 |
| Q8BWW4 | La-related protein 4 OS=Mus musculus GN=Larp4 PE=1 SV=2                                                | 10.57024 | 6  | 12 | 6  | 79.713 | 6.39 | 720000   | 2500000  | 2200000  | 31.19327 |
| Q91VD9 | NADH-ubiquinone oxidoreductase 75 kDa subunit, mitochondrial OS=Mus musculus GN=Ndufs1 PE=1 SV=2       | 20.22008 | 14 | 40 | 14 | 79.726 | 5.72 | 12000000 | 8100000  | 7000000  | 115.1429 |
| Q5U3K5 | Rab-like protein 6 OS=Mus musculus GN=Rab16 PE=1 SV=2                                                  | 6.068966 | 3  | 9  | 3  | 79.782 | 5.53 | 1800000  | 1500000  | 1100000  | 29.2067  |
| O08529 | Calpain-2 catalytic subunit OS=Mus musculus GN=Capn2 PE=1 SV=4                                         | 24.42857 | 14 | 39 | 14 | 79.822 | 4.96 | 8900000  | 6200000  | 5400000  | 102.0847 |
| Q8B220 | Poly [ADP-ribose] polymerase 12 OS=Mus musculus GN=Parp12 PE=1 SV=3                                    | 8.438819 | 4  | 6  | 4  | 79.866 | 8.54 |          | 1900000  | 2300000  | 17.57676 |
| Q91ZA3 | Propionyl-CoA carboxylase alpha chain, mitochondrial OS=Mus musculus GN=Pcca PE=1 SV=2                 | 5.38674  | 3  | 8  | 3  | 79.871 | 7.25 | 2300000  | 1800000  | 1800000  | 23.14994 |
| O35250 | Exocyst complex component 7 OS=Mus musculus GN=Exoc7 PE=1 SV=2                                         | 3.873745 | 2  | 3  | 2  | 79.911 | 6.98 |          | 1900000  | 1600000  | 8.512765 |
| O88967 | ATP-dependent zinc metalloprotease YME1L1 OS=Mus musculus GN=Yme1l1 PE=1 SV=1                          | 2.097902 | 1  | 1  | 1  | 79.978 | 8.97 |          |          | 620000   | 2.126961 |
| Q5RJG1 | Nucleolar protein 10 OS=Mus musculus GN=No10 PE=2 SV=1                                                 | 1.455604 | 1  | 1  | 1  | 80.027 | 8.19 |          | 630000   |          | 1.916075 |
| Q8BY89 | Choline transporter-like protein 2 OS=Mus musculus GN=Slc44a2 PE=1 SV=2                                | 2.691218 | 2  | 2  | 2  | 80.057 | 8.79 | 2300000  | 1500000  |          | 4.606938 |
| P28741 | Kinesin-like protein KIF3A OS=Mus musculus GN=Kif3a PE=1 SV=2                                          | 4.707561 | 3  | 5  | 3  | 80.12  | 6.54 | 530000   | 760000   | 590000   | 11.66743 |
| Q9CQJ1 | Heat shock protein 75 kDa, mitochondrial OS=Mus musculus GN=Trap1 PE=1 SV=1                            | 8.215297 | 5  | 17 | 4  | 80.159 | 6.68 | 1E+08    | 82000000 | 77000000 | 52.12011 |
| Q61216 | Double-strand break repair protein MRE11A OS=Mus musculus GN=Mre11a PE=1 SV=1                          | 4.249292 | 3  | 7  | 3  | 80.173 | 6.01 | 1200000  | 1200000  | 1300000  | 16.96195 |
| Q8BIJ7 | RUN and FYVE domain-containing protein 1 OS=Mus musculus GN=Rufy1 PE=1 SV=1                            | 1.825843 | 1  | 1  | 1  | 80.326 | 5.68 |          | 560000   |          | 2.06123  |
| Q99PU5 | Long-chain-fatty-acid--CoA ligase ACSBG1 OS=Mus musculus GN=Acsbg1 PE=1 SV=1                           | 15.67268 | 8  | 17 | 8  | 80.374 | 5.94 | 3600000  | 2600000  | 1900000  | 49.88495 |
| Q06335 | Amyloid-like protein 2 OS=Mus musculus GN=Aplp2 PE=1 SV=4                                              | 2.545969 | 1  | 1  | 1  | 80.416 | 4.7  |          |          | 490000   | 2.526754 |

|        |                                                                                                                 |          |    |    |    |        |      |          |          |          |          |
|--------|-----------------------------------------------------------------------------------------------------------------|----------|----|----|----|--------|------|----------|----------|----------|----------|
| Q62108 | Disks large homolog 4 OS=Mus musculus GN=Dlg4 PE=1 SV=1                                                         | 5.110497 | 3  | 7  | 3  | 80.423 | 5.87 | 2900000  | 1000000  | 1000000  | 18.88441 |
| Q9CZW4 | Long-chain-fatty-acid--CoA ligase 3 OS=Mus musculus GN=Acs3 PE=1 SV=2                                           | 5        | 3  | 8  | 2  | 80.441 | 8.54 | 3400000  | 3300000  | 2500000  | 23.09235 |
| P59114 | Phosphorylated CTD-interacting factor 1 OS=Mus musculus GN=Pcif1 PE=1 SV=1                                      | 2.266289 | 1  | 1  | 1  | 80.453 | 7.64 |          |          | 800000   | 2.056464 |
| O70582 | Arachidonate 12-lipoxygenase, 12R-type OS=Mus musculus GN=Alox12b PE=1 SV=1                                     | 1.283888 | 1  | 1  | 1  | 80.525 | 6.71 |          |          |          | 2.480427 |
| Q91YK2 | Ribosomal RNA processing protein 1 homolog B OS=Mus musculus GN=Rrp1b PE=1 SV=2                                 | 8.839779 | 4  | 8  | 4  | 80.532 | 9.72 | 1500000  | 1700000  | 1400000  | 22.81821 |
| P46978 | Dolichyl-diphosphooligosaccharide--protein glycosyltransferase subunit STT3A OS=Mus musculus GN=Stt3a PE=1 SV=1 | 9.64539  | 7  | 15 | 7  | 80.545 | 8.1  | 8600000  | 11000000 | 14000000 | 38.00268 |
| Q8C267 | Histone-lysine N-methyltransferase SETDB2 OS=Mus musculus GN=Setdb2 PE=2 SV=2                                   | 2.103787 | 1  | 1  | 1  | 80.585 | 8.02 |          | 260000   |          | 2.277014 |
| Q9QYB8 | Beta-adducin OS=Mus musculus GN=Add2 PE=1 SV=4                                                                  | 5.37931  | 3  | 6  | 3  | 80.591 | 6.21 | 4400000  | 3000000  | 1800000  | 16.07266 |
| Q9QYC0 | Alpha-adducin OS=Mus musculus GN=Add1 PE=1 SV=2                                                                 | 16.32653 | 9  | 18 | 9  | 80.596 | 5.9  | 8100000  | 3300000  | 5500000  | 52.54677 |
| O89090 | Transcription factor Sp1 OS=Mus musculus GN=Sp1 PE=1 SV=2                                                       | 6.25     | 2  | 3  | 2  | 80.683 | 7.34 |          | 500000   | 360000   | 11.8671  |
| Q9QUR6 | Prolyl endopeptidase OS=Mus musculus GN=Prep PE=1 SV=1                                                          | 1.830986 | 1  | 2  | 1  | 80.7   | 5.73 | 1600000  | 1300000  |          | 4.91121  |
| Q9R1R2 | Tripartite motif-containing protein 3 OS=Mus musculus GN=Trim3 PE=1 SV=1                                        | 1.478495 | 1  | 2  | 1  | 80.724 | 7.81 | 2100000  | 1600000  |          | 5.018698 |
| Q8K4B0 | Metastasis-associated protein MTA1 OS=Mus musculus GN=Mta1 PE=1 SV=1                                            | 7.692308 | 4  | 5  | 4  | 80.747 | 9.29 |          | 1300000  | 1300000  | 13.58732 |
| A2AQ19 | RNA polymerase-associated protein RTF1 homolog OS=Mus musculus GN=Rtf1 PE=1 SV=1                                | 4.755245 | 3  | 6  | 3  | 80.748 | 8.16 | 2300000  | 2600000  | 1800000  | 17.74891 |
| Q8BJW5 | Nucleolar protein 11 OS=Mus musculus GN=Nol11 PE=2 SV=1                                                         | 5.255878 | 3  | 4  | 3  | 80.766 | 5.92 | 540000   | 390000   | 1700000  | 9.19161  |
| Q08943 | FACT complex subunit SSRP1 OS=Mus musculus GN=Ssrp1 PE=1 SV=2                                                   | 15.39548 | 10 | 21 | 10 | 80.81  | 6.76 | 7700000  | 8100000  | 8200000  | 58.09517 |
| A2RSY6 | TRMT1-like protein OS=Mus musculus GN=Trmt1 PE=1 SV=1                                                           | 8.241758 | 3  | 5  | 3  | 80.81  | 7.5  | 1300000  | 1100000  | 2000000  | 20.78084 |
| P97350 | Plakophilin-1 OS=Mus musculus GN=Pkp1 PE=1 SV=1                                                                 | 3.021978 | 2  | 2  | 2  | 80.844 | 8.91 |          |          | 1200000  | 5.169135 |
| Q64521 | Glycerol-3-phosphate dehydrogenase, mitochondrial OS=Mus musculus GN=Gpd2 PE=1 SV=2                             | 23.65887 | 15 | 33 | 15 | 80.902 | 6.61 | 9300000  | 5500000  | 6400000  | 94.32233 |
| Q6PGF7 | Exocyst complex component 8 OS=Mus musculus GN=Exoc8 PE=1 SV=1                                                  | 6.284916 | 3  | 9  | 3  | 80.984 | 5.4  | 1100000  | 970000   | 1000000  | 27.73355 |
| Q8BJ1  | Sodium-dependent neutral amino acid transporter SLC6A17 OS=Mus musculus GN=Slc6a17 PE=1 SV=1                    | 1.788171 | 1  | 1  | 1  | 81.018 | 6.23 | 1900000  |          |          | 3.595463 |
| Q8C561 | LMBR1 domain-containing protein 2 OS=Mus musculus GN=Lmbrd2 PE=1 SV=1                                           | 5.907781 | 3  | 5  | 3  | 81.049 | 7.34 | 3000000  | 1500000  | 1600000  | 14.13743 |
| Q3TVI8 | Pre-B-cell leukemia transcription factor-interacting protein 1 OS=Mus musculus GN=Pbxip1 PE=1 SV=2              | 9.903714 | 5  | 12 | 5  | 81.115 | 5.36 | 2100000  | 2000000  | 1600000  | 34.60725 |
| Q61881 | DNA replication licensing factor MCM7 OS=Mus musculus GN=Mcm7 PE=1 SV=1                                         | 15.02086 | 9  | 14 | 9  | 81.16  | 6.37 | 7300000  | 5300000  | 5400000  | 40.06036 |
| Q91YJ5 | Translation initiation factor IF-2, mitochondrial OS=Mus musculus GN=Mtif2 PE=1 SV=2                            | 1.650619 | 1  | 1  | 1  | 81.238 | 7.24 |          |          | 720000   | 1.863673 |
| P29533 | Vascular cell adhesion protein 1 OS=Mus musculus GN=Vcam1 PE=1 SV=1                                             | 18.67388 | 10 | 20 | 10 | 81.265 | 5.3  | 4900000  | 2600000  | 2400000  | 57.30618 |
| Q9ESN6 | Tripartite motif-containing protein 2 OS=Mus musculus GN=Trim2 PE=1 SV=1                                        | 1.478495 | 1  | 3  | 1  | 81.394 | 6.96 | 2400000  | 1200000  | 1600000  | 7.837379 |
| O35613 | Death domain-associated protein 6 OS=Mus musculus GN=Daxx PE=1 SV=1                                             | 2.571042 | 1  | 3  | 1  | 81.439 | 4.7  | 1300000  | 1500000  | 1300000  | 8.457568 |
| Q8R146 | Acylamino-acid-releasing enzyme OS=Mus musculus GN=Apeh PE=1 SV=3                                               | 1.639344 | 1  | 1  | 1  | 81.529 | 5.59 | 700000   |          |          | 2.495932 |
| Q8BJS4 | SUN domain-containing protein 2 OS=Mus musculus GN=Sun2 PE=1 SV=3                                               | 9.98632  | 5  | 12 | 5  | 81.555 | 7.02 | 2400000  | 1200000  | 2100000  | 34.04624 |
| P58404 | Striatin-4 OS=Mus musculus GN=Strn4 PE=1 SV=2                                                                   | 5.263158 | 3  | 7  | 3  | 81.595 | 5.38 | 1600000  | 1500000  | 1300000  | 19.74063 |
| Q69298 | Serine/threonine-protein kinase BRSK2 OS=Mus musculus GN=Brsk2 PE=1 SV=2                                        | 1.904762 | 1  | 1  | 1  | 81.682 | 8.79 | 670000   |          |          | 2.92852  |
| Q02257 | Junction plakoglobin OS=Mus musculus GN=Jup PE=1 SV=3                                                           | 11.81208 | 7  | 13 | 6  | 81.749 | 6.14 | 1900000  |          | 8000000  | 36.93432 |
| Q8BH15 | CCR4-NOT transcription complex subunit 10 OS=Mus musculus GN=Cnot10 PE=1 SV=1                                   | 6.182796 | 3  | 7  | 3  | 81.766 | 7.68 | 940000   | 920000   | 900000   | 22.35857 |
| P48410 | ATP-binding cassette sub-family D member 1 OS=Mus musculus GN=Abcd1 PE=1 SV=1                                   | 2.717391 | 1  | 4  | 1  | 81.807 | 8.7  | 100000   | 1500000  | 1000000  | 13.06758 |
| Q9CZD3 | Glycine--tRNA ligase OS=Mus musculus GN=Gars PE=1 SV=1                                                          | 10.42524 | 7  | 14 | 7  | 81.826 | 6.65 | 3900000  | 5100000  | 2000000  | 35.81318 |
| Q8K0V4 | CCR4-NOT transcription complex subunit 3 OS=Mus musculus GN=Cnot3 PE=1 SV=1                                     | 2.52996  | 1  | 1  | 1  | 81.896 | 6.2  |          |          |          | 3.18332  |
| Q921L5 | Conserved oligomeric Golgi complex subunit 2 OS=Mus musculus GN=Cog2 PE=1 SV=2                                  | 2.599179 | 1  | 3  | 1  | 81.988 | 6.21 | 410000   | 550000   | 450000   | 9.240847 |
| Q8C754 | Vacuolar protein sorting-associated protein 52 homolog OS=Mus musculus GN=Vps52 PE=1 SV=1                       | 1.936376 | 1  | 1  | 1  | 81.993 | 5.9  |          |          | 280000   | 1.805988 |
| Q8VDQ9 | Protein KRI1 homolog OS=Mus musculus GN=Kri1 PE=1 SV=3                                                          | 1.704545 | 1  | 3  | 1  | 82.007 | 5.12 | 1200000  | 1100000  | 880000   | 9.184277 |
| O35350 | Calpain-1 catalytic subunit OS=Mus musculus GN=Capn1 PE=1 SV=1                                                  | 17.25105 | 11 | 24 | 11 | 82.054 | 5.87 | 7800000  | 5900000  | 5400000  | 68.78632 |
| Q99MJ9 | ATP-dependent RNA helicase DDX50 OS=Mus musculus GN=Ddx50 PE=2 SV=1                                             | 2.043597 | 1  | 1  | 1  | 82.125 | 9.25 |          |          | 1200000  | 2.331188 |
| Q8CHT1 | Ephexin-1 OS=Mus musculus GN=Ngef PE=1 SV=1                                                                     | 1.549296 | 1  | 1  | 1  | 82.148 | 5.99 | 670000   |          |          | 2.714154 |
| O55047 | Serine/threonine-protein kinase tousled-like 2 OS=Mus musculus GN=Tlk2 PE=1 SV=2                                | 1.392758 | 1  | 2  | 1  | 82.21  | 8.27 | 1100000  | 1500000  |          | 4.897829 |
| Q8C156 | Condensin complex subunit 2 OS=Mus musculus GN=Ncaph PE=1 SV=1                                                  | 5.608755 | 2  | 2  | 2  | 82.251 | 4.96 |          | 1300000  | 2600000  | 7.451934 |
| P49718 | DNA replication licensing factor MCM5 OS=Mus musculus GN=Mcm5 PE=1 SV=1                                         | 15.68895 | 9  | 17 | 9  | 82.29  | 8.43 | 1600000  | 5800000  | 4200000  | 47.8766  |
| O70494 | Transcription factor Sp3 OS=Mus musculus GN=Sp3 PE=1 SV=2                                                       | 3.57599  | 2  | 2  | 2  | 82.312 | 5.26 | 250000   | 1900000  |          | 6.424081 |
| Q9QYE6 | Golgin subfamily A member 5 OS=Mus musculus GN=Golga5 PE=1 SV=2                                                 | 3.566529 | 1  | 3  | 1  | 82.318 | 6.23 | 2300000  | 2000000  | 2000000  | 12.9102  |
| Q8BJ05 | Zinc finger CCH domain-containing protein 14 OS=Mus musculus GN=Zc3h14 PE=1 SV=1                                | 2.857143 | 2  | 4  | 2  | 82.357 | 7.37 | 1400000  | 1700000  | 1500000  | 9.73915  |
| O35691 | Pinin OS=Mus musculus GN=Pnn PE=1 SV=4                                                                          | 19.86207 | 10 | 24 | 10 | 82.386 | 7.01 | 5900000  | 8900000  | 8300000  | 84.45313 |
| Q91VR5 | ATP-dependent RNA helicase DDX1 OS=Mus musculus GN=Ddx1 PE=1 SV=1                                               | 22.56757 | 13 | 30 | 13 | 82.448 | 7.21 | 12000000 | 10000000 | 11000000 | 77.85273 |
| P97452 | Ribosome biogenesis protein BOP1 OS=Mus musculus GN=Bop1 PE=1 SV=1                                              | 7.377049 | 4  | 6  | 4  | 82.494 | 6.28 | 270000   | 2200000  | 1300000  | 14.80319 |
| Q61102 | ATP-binding cassette sub-family B member 7, mitochondrial OS=Mus musculus GN=Abcb7 PE=1 SV=3                    | 1.595745 | 1  | 3  | 1  | 82.529 | 9.32 | 4600000  | 4400000  | 3800000  | 7.874932 |

|        |                                                                                                    |          |    |     |    |        |      |          |          |          |          |
|--------|----------------------------------------------------------------------------------------------------|----------|----|-----|----|--------|------|----------|----------|----------|----------|
| P46460 | Vesicle-fusing ATPase OS=Mus musculus GN=Nsf PE=1 SV=2                                             | 27.95699 | 19 | 54  | 18 | 82.561 | 6.95 | 27000000 | 16000000 | 15000000 | 157.8413 |
| Q9JIS5 | Synaptic vesicle glycoprotein 2A OS=Mus musculus GN=Sv2a PE=1 SV=1                                 | 7.681941 | 4  | 12  | 4  | 82.594 | 5.57 | 6100000  | 3400000  | 3300000  | 37.03918 |
| Q8K1M6 | Dynamin-1-like protein OS=Mus musculus GN=Dnm1 PE=1 SV=2                                           | 12.26415 | 6  | 10  | 6  | 82.606 | 7.05 | 2300000  | 3100000  | 570000   | 30.47317 |
| Q8BMS1 | Trifunctional enzyme subunit alpha, mitochondrial OS=Mus musculus GN=Hadha PE=1 SV=1               | 15.85845 | 10 | 25  | 10 | 82.617 | 9.14 | 16000000 | 12000000 | 12000000 | 76.35916 |
| P16332 | Methylmalonyl-CoA mutase, mitochondrial OS=Mus musculus GN=Mut PE=1 SV=2                           | 1.737968 | 1  | 3   | 1  | 82.792 | 6.89 | 2000000  | 1500000  | 1200000  | 8.760977 |
| Q99L17 | Cleavage stimulation factor subunit 3 OS=Mus musculus GN=Cstf3 PE=1 SV=1                           | 5.718271 | 4  | 7   | 4  | 82.824 | 8.12 | 2500000  | 2000000  | 2100000  | 17.29736 |
| Q9Z2I0 | LETM1 and EF-hand domain-containing protein 1, mitochondrial OS=Mus musculus GN=Letm1 PE=1 SV=1    | 13.14363 | 8  | 16  | 8  | 82.937 | 6.52 | 3600000  | 5400000  | 5600000  | 47.11817 |
| Q8OU70 | Polycomb protein Suz12 OS=Mus musculus GN=Suz12 PE=1 SV=2                                          | 11.06613 | 5  | 8   | 5  | 82.974 | 8.81 | 1400000  | 850000   | 840000   | 24.22896 |
| Q3UIR3 | E3 ubiquitin-protein ligase DTX3L OS=Mus musculus GN=Dtx3l PE=1 SV=1                               | 23.12834 | 11 | 36  | 11 | 82.991 | 8.09 | 4400000  | 3500000  | 3800000  | 100.9275 |
| Q8BSY0 | Aspartyl/asparaginyl beta-hydroxylase OS=Mus musculus GN=Asph PE=1 SV=1                            | 22.80702 | 9  | 22  | 9  | 82.991 | 5.08 | 7300000  | 6900000  | 7900000  | 79.67094 |
| P27641 | X-ray repair cross-complementing protein 5 OS=Mus musculus GN=Xrcc5 PE=1 SV=4                      | 9.289617 | 5  | 9   | 5  | 83.004 | 5.16 | 2500000  | 2400000  | 6500000  | 26.11947 |
| A2A8Z1 | Oxysterol-binding protein-related protein 9 OS=Mus musculus GN=Osbp19 PE=1 SV=1                    | 1.766304 | 1  | 1   | 1  | 83.057 | 6.07 |          | 940000   |          | 3.426275 |
| Q8BLN5 | Lanosterol synthase OS=Mus musculus GN=Lss PE=1 SV=2                                               | 1.773533 | 1  | 1   | 1  | 83.088 | 6.4  |          |          |          | 2.440705 |
| Q8C167 | Prolyl endopeptidase-like OS=Mus musculus GN=Prepl PE=1 SV=1                                       | 1.931034 | 1  | 1   | 1  | 83.141 | 6.65 | 500000   |          |          | 3.059724 |
| Q8BH61 | Coagulation factor XIII A chain OS=Mus musculus GN=F13a1 PE=1 SV=3                                 | 5.601093 | 3  | 7   | 3  | 83.155 | 5.92 | 11000000 | 9800000  | 6900000  | 24.99021 |
| Q8BUK6 | Protein Hook homolog 3 OS=Mus musculus GN=Hook3 PE=1 SV=2                                          | 10.02786 | 5  | 9   | 5  | 83.166 | 5.19 | 1600000  | 1300000  | 960000   | 26.9441  |
| P11499 | Heat shock protein HSP 90-beta OS=Mus musculus GN=Hsp90ab1 PE=1 SV=3                               | 52.62431 | 38 | 186 | 24 | 83.229 | 5.03 | 2.3E+08  | 2.1E+08  | 2E+08    | 575.0457 |
| Q8BUV3 | Gephyrin OS=Mus musculus GN=Gphn PE=1 SV=2                                                         | 6.371912 | 3  | 7   | 3  | 83.223 | 5.6  | 1800000  | 1300000  | 880000   | 21.59353 |
| Q99LH1 | Nucleolar GTP-binding protein 2 OS=Mus musculus GN=Gnl2 PE=1 SV=2                                  | 2.884615 | 2  | 3   | 2  | 83.294 | 9.2  | 620000   | 1200000  | 430000   | 7.297606 |
| Q9D0R2 | Threonine--tRNA ligase, cytoplasmic OS=Mus musculus GN=Tars PE=1 SV=2                              | 19.9446  | 12 | 31  | 12 | 83.303 | 7.36 | 6400000  | 6100000  | 4000000  | 87.21594 |
| P63154 | Crooked neck-like protein 1 OS=Mus musculus GN=Crnk1 PE=1 SV=1                                     | 5.072464 | 3  | 6   | 3  | 83.363 | 6.93 | 2100000  | 2500000  | 2000000  | 15.30808 |
| Q9WUN2 | Serine/threonine-protein kinase TBK1 OS=Mus musculus GN=Tbk1 PE=1 SV=1                             | 8.641975 | 4  | 5   | 4  | 83.372 | 6.87 | 840000   | 410000   |          | 13.8437  |
| P26450 | Phosphatidylinositol 3-kinase regulatory subunit alpha OS=Mus musculus GN=Pik3r1 PE=1 SV=2         | 2.762431 | 2  | 2   | 2  | 83.465 | 6.28 |          | 540000   | 310000   | 4.298019 |
| Q9WTX8 | Mitotic spindle assembly checkpoint protein MAD1 OS=Mus musculus GN=Mad111 PE=1 SV=1               | 4.04463  | 2  | 2   | 2  | 83.49  | 5.66 |          | 350000   | 880000   | 4.409986 |
| Q8K0D5 | Elongation factor G, mitochondrial OS=Mus musculus GN=Gfm1 PE=1 SV=1                               | 1.198402 | 1  | 3   | 1  | 83.496 | 6.92 | 1100000  | 860000   | 750000   | 6.793861 |
| P16054 | Protein kinase C epsilon type OS=Mus musculus GN=Prkce PE=1 SV=1                                   | 6.377205 | 3  | 4   | 3  | 83.507 | 7.03 | 1400000  | 470000   | 590000   | 9.660074 |
| Q8K0T0 | Reticulon-1 OS=Mus musculus GN=Rtn1 PE=1 SV=1                                                      | 3.717949 | 3  | 8   | 2  | 83.521 | 4.58 | 6100000  | 8200000  | 4100000  | 20.03206 |
| Q9R0E2 | Procollagen-lysine,2-oxoglutarate 5-dioxygenase 1 OS=Mus musculus GN=Plod1 PE=1 SV=1               | 3.021978 | 2  | 3   | 2  | 83.542 | 6.54 | 3100000  | 3200000  |          | 6.869874 |
| Q3V1T4 | Prolyl 3-hydroxylase 1 OS=Mus musculus GN=P3h1 PE=1 SV=2                                           | 5.683356 | 3  | 5   | 3  | 83.598 | 5.14 | 2600000  | 2400000  | 1900000  | 14.48046 |
| Q811U4 | Mitofusin-1 OS=Mus musculus GN=Mfn1 PE=1 SV=3                                                      | 2.024291 | 1  | 1   | 1  | 83.673 | 6.51 |          |          | 740000   | 2.705495 |
| Q9Z175 | Lysyl oxidase homolog 3 OS=Mus musculus GN=Loxl3 PE=2 SV=2                                         | 3.97878  | 2  | 3   | 2  | 83.686 | 7.01 | 680000   | 1500000  |          | 9.271298 |
| Q61164 | Transcriptional repressor CTCF OS=Mus musculus GN=Ctcf PE=1 SV=2                                   | 7.336957 | 3  | 7   | 3  | 83.692 | 6.9  | 1700000  | 1900000  | 1500000  | 23.52486 |
| Q3V0M2 | Leucine-rich repeat-containing protein 36 OS=Mus musculus GN=Lrrc36 PE=1 SV=2                      | 1.059603 | 1  | 1   | 1  | 83.711 | 7.31 |          |          | 1200000  | 1.838497 |
| Q8BHL5 | Engulfment and cell motility protein 2 OS=Mus musculus GN=Elmo2 PE=1 SV=1                          | 7.103825 | 3  | 8   | 2  | 83.833 | 5.95 | 2200000  | 2500000  | 1600000  | 24.10374 |
| Q8CAQ8 | MICOS complex subunit Mic60 OS=Mus musculus GN=Immt PE=1 SV=1                                      | 26.02378 | 17 | 46  | 17 | 83.848 | 6.61 | 26000000 | 20000000 | 21000000 | 138.7222 |
| P83093 | Stromal interaction molecule 2 OS=Mus musculus GN=Stim2 PE=1 SV=2                                  | 7.104558 | 3  | 5   | 3  | 83.872 | 6.79 | 360000   | 460000   | 1200000  | 16.6898  |
| Q8BPU7 | Engulfment and cell motility protein 1 OS=Mus musculus GN=Elmo1 PE=1 SV=2                          | 10.59147 | 5  | 10  | 4  | 83.882 | 6.28 | 3000000  | 2000000  | 1200000  | 23.16076 |
| Q6Y685 | Transforming acidic coiled-coil-containing protein 1 OS=Mus musculus GN=Tacc1 PE=1 SV=1            | 5.684755 | 3  | 3   | 3  | 83.9   | 5.03 | 1400000  | 1300000  |          | 7.20843  |
| Q99MD9 | Nuclear autoantigenic sperm protein OS=Mus musculus GN=Nasp PE=1 SV=2                              | 5.562743 | 4  | 4   | 4  | 83.903 | 4.37 | 1900000  | 1900000  |          | 10.16502 |
| Q35598 | Disintegrin and metalloproteinase domain-containing protein 10 OS=Mus musculus GN=Adam10 PE=1 SV=2 | 3.604806 | 2  | 3   | 2  | 83.914 | 7.94 | 1200000  | 1200000  | 820000   | 8.584552 |
| Q9ERG0 | LIM domain and actin-binding protein 1 OS=Mus musculus GN=Lima1 PE=1 SV=3                          | 12.6162  | 6  | 13  | 6  | 84.008 | 6.6  | 9200000  | 8800000  | 2700000  | 40.07147 |
| Q9D2N4 | Dystrobrevin alpha OS=Mus musculus GN=Dtna PE=1 SV=2                                               | 3.08311  | 2  | 2   | 2  | 84.014 | 6.76 | 990000   | 1600000  |          | 7.128868 |
| Q9JLM8 | Serine/threonine-protein kinase DCLK1 OS=Mus musculus GN=Dclk1 PE=1 SV=1                           | 1.719577 | 1  | 3   | 1  | 84.101 | 8.87 | 2600000  | 2200000  |          | 9.723764 |
| Q8CGC6 | RNA-binding protein 28 OS=Mus musculus GN=Rbm28 PE=1 SV=4                                          | 5.066667 | 3  | 3   | 3  | 84.162 | 9.54 |          |          | 1100000  | 6.820519 |
| Q8R2M2 | Deoxynucleotidyltransferase terminal-interacting protein 2 OS=Mus musculus GN=Dnttip2 PE=1 SV=1    | 11.6095  | 4  | 11  | 4  | 84.226 | 6.44 | 920000   | 1400000  | 1500000  | 40.9229  |
| Q03141 | MAP/microtubule affinity-regulating kinase 3 OS=Mus musculus GN=Mark3 PE=1 SV=2                    | 4.249668 | 2  | 5   | 1  | 84.337 | 9.51 | 1000000  | 660000   |          | 16.65119 |
| Q9R0B9 | Procollagen-lysine,2-oxoglutarate 5-dioxygenase 2 OS=Mus musculus GN=Plod2 PE=1 SV=2               | 3.527815 | 2  | 5   | 2  | 84.435 | 6.89 | 720000   | 1200000  | 1100000  | 14.29247 |
| Q57119 | Aldehyde dehydrogenase family 16 member A1 OS=Mus musculus GN=Aldh16a1 PE=1 SV=2                   | 3.117207 | 2  | 5   | 2  | 84.703 | 6.32 | 1300000  | 1200000  | 1000000  | 14.40554 |
| Q924C6 | Lysyl oxidase homolog 4 OS=Mus musculus GN=Loxl4 PE=2 SV=2                                         | 1.585205 | 1  | 1   | 1  | 84.724 | 7.99 |          |          |          | 3.05384  |
| P07901 | Heat shock protein HSP 90-alpha OS=Mus musculus GN=Hsp90aa1 PE=1 SV=4                              | 43.92906 | 32 | 122 | 20 | 84.735 | 5.01 | 72000000 | 57000000 | 53000000 | 366.3012 |
| Q8R1F1 | Niban-like protein 1 OS=Mus musculus GN=Fam129b PE=1 SV=2                                          | 2.803738 | 2  | 2   | 2  | 84.765 | 5.94 |          | 2100000  |          | 4.264666 |
| Q9R0E1 | Procollagen-lysine,2-oxoglutarate 5-dioxygenase 3 OS=Mus musculus GN=Plod3 PE=1 SV=1               | 5.398111 | 3  | 7   | 3  | 84.869 | 6.23 | 1300000  | 3600000  | 3700000  | 21.37901 |
| P51125 | Calpastatin OS=Mus musculus GN=Cast PE=1 SV=2                                                      | 1.649746 | 1  | 2   | 1  | 84.871 | 5.52 |          | 930000   |          | 6.947218 |



|        |                                                                                                          |          |    |    |    |        |      |          |          |          |          |
|--------|----------------------------------------------------------------------------------------------------------|----------|----|----|----|--------|------|----------|----------|----------|----------|
| Q8CECO | Nuclear pore complex protein Nup88 OS=Mus musculus GN=Nup88 PE=1 SV=1                                    | 3.718459 | 2  | 3  | 2  | 84.884 | 6.27 | 1100000  | 1100000  | 8.256951 |          |
| Q00P19 | Heterogeneous nuclear ribonucleoprotein U-like protein 2 OS=Mus musculus GN=Hnrnpul2 PE=1 SV=2           | 24.83221 | 14 | 53 | 14 | 84.888 | 4.89 | 16000000 | 15000000 | 13000000 | 156.4319 |
| P04186 | Complement factor B OS=Mus musculus GN=Cfb PE=1 SV=2                                                     | 1.576873 | 1  | 1  | 1  | 84.951 | 7.37 |          |          | 1200000  | 2.580644 |
| P11835 | Integrin beta-2 OS=Mus musculus GN=Itgb2 PE=1 SV=2                                                       | 28.40467 | 17 | 40 | 16 | 84.97  | 7.12 | 12000000 | 13000000 | 9300000  | 124.3487 |
| P47713 | Cytosolic phospholipase A2 OS=Mus musculus GN=Pla2g4a PE=1 SV=1                                          | 5.347594 | 4  | 8  | 4  | 85.168 | 5.43 | 1600000  | 1900000  | 1700000  | 19.84805 |
| Q8C1D8 | Protein IWS1 homolog OS=Mus musculus GN=lws1 PE=1 SV=1                                                   | 4.699739 | 3  | 9  | 3  | 85.197 | 4.67 | 1500000  | 1500000  | 1200000  | 22.68905 |
| P47857 | ATP-dependent 6-phosphofructokinase, muscle type OS=Mus musculus GN=Pfkm PE=1 SV=3                       | 7.948718 | 5  | 11 | 4  | 85.215 | 8    | 1800000  | 820000   | 2600000  | 31.04393 |
| Q61771 | Kinesin-like protein KIF3B OS=Mus musculus GN=Kif3b PE=1 SV=1                                            | 3.212851 | 2  | 2  | 2  | 85.236 | 7.69 | 950000   |          |          | 4.710132 |
| Q68FF6 | ARF GTPase-activating protein GIT1 OS=Mus musculus GN=Git1 PE=1 SV=1                                     | 7.662338 | 4  | 10 | 4  | 85.247 | 6.93 | 2200000  | 1800000  | 2300000  | 26.9008  |
| P12382 | ATP-dependent 6-phosphofructokinase, liver type OS=Mus musculus GN=Pfkl PE=1 SV=4                        | 5.641026 | 4  | 11 | 2  | 85.305 | 7.17 |          | 1400000  | 1800000  | 34.64369 |
| Q9WV70 | Nucleolar complex protein 2 homolog OS=Mus musculus GN=Noc2l PE=1 SV=2                                   | 4.685408 | 3  | 5  | 3  | 85.371 | 5.97 | 1300000  | 1100000  | 1700000  | 16.54119 |
| Q1HFZ0 | tRNA (cytosine(34)-C(5))-methyltransferase OS=Mus musculus GN=Nsun2 PE=1 SV=2                            | 8.190225 | 3  | 3  | 3  | 85.397 | 6.58 |          | 1400000  |          | 8.628748 |
| Q9WUA3 | ATP-dependent 6-phosphofructokinase, platelet type OS=Mus musculus GN=Pfkl PE=1 SV=1                     | 10.71429 | 7  | 21 | 5  | 85.4   | 7.11 | 5500000  | 4700000  | 4200000  | 63.32037 |
| Q99K10 | Aconitate hydratase, mitochondrial OS=Mus musculus GN=Aco2 PE=1 SV=1                                     | 32.4359  | 21 | 68 | 21 | 85.41  | 7.93 | 41000000 | 35000000 | 41000000 | 197.597  |
| Q02248 | Catenin beta-1 OS=Mus musculus GN=Ctnnb1 PE=1 SV=1                                                       | 7.554417 | 4  | 10 | 3  | 85.416 | 5.86 | 5000000  | 6900000  | 5400000  | 31.99909 |
| P15379 | CD44 antigen OS=Mus musculus GN=Cd44 PE=1 SV=3                                                           | 6.55527  | 4  | 16 | 4  | 85.565 | 4.96 | 6100000  | 5500000  | 2100000  | 49.80819 |
| E9Q5K9 | YTH domain-containing protein 1 OS=Mus musculus GN=Ythdc1 PE=1 SV=2                                      | 1.494565 | 1  | 2  | 1  | 85.598 | 6.16 | 2600000  | 880000   |          | 4.286761 |
| Q9Z2B9 | Ribosomal protein S6 kinase alpha-4 OS=Mus musculus GN=Rps6ka4 PE=1 SV=2                                 | 1.681759 | 1  | 1  | 1  | 85.598 | 8.27 |          |          |          | 2.835564 |
| Q91WR3 | Activating signal cointegrator 1 complex subunit 2 OS=Mus musculus GN=Ascc2 PE=1 SV=1                    | 1.735648 | 1  | 1  | 1  | 85.599 | 5.03 |          |          |          | 1.9091   |
| Q9QYH6 | Melanoma-associated antigen D1 OS=Mus musculus GN=Maged1 PE=1 SV=1                                       | 1.935484 | 1  | 2  | 1  | 85.617 | 7.5  |          | 290000   | 170000   | 5.081599 |
| Q8K1R3 | Polyribonucleotide nucleotidyltransferase 1, mitochondrial OS=Mus musculus GN=Pnpt1 PE=1 SV=1            | 2.554278 | 2  | 3  | 2  | 85.628 | 8.03 | 850000   |          | 630000   | 6.735148 |
| Q62351 | Transferrin receptor protein 1 OS=Mus musculus GN=Tfrc PE=1 SV=1                                         | 6.159895 | 4  | 11 | 4  | 85.677 | 6.57 | 1500000  | 1800000  | 1300000  | 30.36131 |
| Q8R3B1 | 1-phosphatidylinositol 4,5-bisphosphate phosphodiesterase delta-1 OS=Mus musculus GN=Plcd1 PE=1 SV=2     | 3.571429 | 2  | 2  | 2  | 85.819 | 6.21 |          |          | 630000   | 5.205724 |
| Q921N6 | Probable ATP-dependent RNA helicase DDX27 OS=Mus musculus GN=Ddx27 PE=1 SV=3                             | 11.71053 | 7  | 17 | 7  | 85.885 | 9.25 | 2100000  | 2900000  | 3100000  | 45.02644 |
| P13020 | Gelsolin OS=Mus musculus GN=Gsn PE=1 SV=3                                                                | 17.05128 | 9  | 24 | 9  | 85.888 | 6.18 | 16000000 | 13000000 | 9200000  | 77.33207 |
| Q9WTR1 | Transient receptor potential cation channel subfamily V member 2 OS=Mus musculus GN=Trpv2 PE=1 SV=2      | 5.952381 | 3  | 4  | 3  | 85.91  | 6.99 | 1400000  |          | 790000   | 13.7977  |
| O55106 | Striatin OS=Mus musculus GN=Strn PE=1 SV=2                                                               | 9.358974 | 5  | 9  | 5  | 85.913 | 5.27 | 2100000  | 1600000  | 1400000  | 26.9081  |
| Q99L18 | Hepatocyte growth factor-regulated tyrosine kinase substrate OS=Mus musculus GN=Hgs PE=1 SV=2            | 5.677419 | 4  | 7  | 4  | 85.961 | 6.16 | 1200000  | 1200000  | 1100000  | 18.45296 |
| P06537 | Glucocorticoid receptor OS=Mus musculus GN=Nr3c1 PE=1 SV=1                                               | 4.214559 | 2  | 2  | 2  | 85.998 | 6.35 | 180000   |          |          | 5.287182 |
| Q01405 | Protein transport protein Sec23A OS=Mus musculus GN=Sec23a PE=1 SV=2                                     | 7.45098  | 4  | 10 | 4  | 86.106 | 7.08 |          | 1800000  | 1800000  | 24.05905 |
| Q80U63 | Mitofusin-2 OS=Mus musculus GN=Mfn2 PE=1 SV=3                                                            | 3.830911 | 2  | 4  | 2  | 86.133 | 6.77 | 1500000  | 690000   | 1100000  | 12.95248 |
| Q3UVL4 | Vacuolar protein sorting-associated protein 51 homolog OS=Mus musculus GN=Vps51 PE=1 SV=2                | 2.046036 | 1  | 1  | 1  | 86.133 | 6.24 | 510000   |          |          | 3.215105 |
| Q8BGC0 | HIV Tat-specific factor 1 homolog OS=Mus musculus GN=Htatsf1 PE=1 SV=1                                   | 14.53104 | 6  | 10 | 6  | 86.188 | 4.4  | 1100000  | 1200000  | 780000   | 25.61431 |
| Q05512 | Serine/threonine-protein kinase MARK2 OS=Mus musculus GN=Mark2 PE=1 SV=3                                 | 3.865979 | 2  | 5  | 1  | 86.252 | 9.67 | 750000   | 770000   | 370000   | 12.3915  |
| Q8BVU0 | Leucine-rich repeat and calponin homology domain-containing protein 3 OS=Mus musculus GN=Lrch3 PE=1 SV=3 | 7.197943 | 4  | 8  | 4  | 86.287 | 7.03 | 760000   | 830000   | 920000   | 20.60649 |
| Q9D662 | Protein transport protein Sec23B OS=Mus musculus GN=Sec23b PE=1 SV=1                                     | 5.47588  | 3  | 5  | 3  | 86.382 | 6.96 | 4200000  | 3400000  | 3200000  | 13.59238 |
| Q6KAR6 | Exocyst complex component 3 OS=Mus musculus GN=Exoc3 PE=1 SV=2                                           | 2.251656 | 1  | 1  | 1  | 86.4   | 6.2  |          | 350000   |          | 2.543067 |
| Q6NZF1 | Zinc finger CCCH domain-containing protein 11A OS=Mus musculus GN=Zc3h11a PE=1 SV=1                      | 14.89899 | 9  | 22 | 9  | 86.438 | 8.13 | 2500000  | 4600000  | 5400000  | 67.92367 |
| P35831 | Tyrosine-protein phosphatase non-receptor type 12 OS=Mus musculus GN=Ptpn12 PE=1 SV=3                    | 4.387097 | 2  | 7  | 2  | 86.473 | 5.99 | 1100000  | 1000000  | 450000   | 23.53666 |
| Q3UA37 | Glutamine-rich protein 1 OS=Mus musculus GN=Qrich1 PE=1 SV=1                                             | 2.316602 | 1  | 1  | 1  | 86.502 | 5.96 |          |          |          | 3.03476  |
| Q8C0V0 | Serine/threonine-protein kinase tousled-like 1 OS=Mus musculus GN=TIK1 PE=1 SV=2                         | 2.480418 | 1  | 1  | 1  | 86.57  | 8.79 | 56000    |          |          | 2.815978 |
| Q8BZ10 | Actin filament-associated protein 1-like 1 OS=Mus musculus GN=Afap11l PE=1 SV=1                          | 2.473958 | 1  | 1  | 1  | 86.584 | 6.77 |          |          |          | 2.311008 |
| O88351 | Inhibitor of nuclear factor kappa-B kinase subunit beta OS=Mus musculus GN=Ikbbk PE=1 SV=1               | 4.887715 | 3  | 4  | 3  | 86.635 | 6.4  | 610000   |          | 560000   | 12.08256 |
| P12023 | Amyloid beta A4 protein OS=Mus musculus GN=App PE=1 SV=3                                                 | 20.77922 | 11 | 25 | 11 | 86.667 | 4.79 | 4900000  | 4100000  | 3900000  | 74.0617  |
| Q922K7 | Probable 28S rRNA (cytosine-C(5))-methyltransferase OS=Mus musculus GN=Nop2 PE=1 SV=1                    | 20.42875 | 11 | 24 | 11 | 86.699 | 9.22 | 5900000  | 5800000  | 6600000  | 74.4862  |
| Q8CBY3 | Leukocyte receptor cluster member 8 homolog OS=Mus musculus GN=Leng8 PE=1 SV=1                           | 1.783439 | 1  | 1  | 1  | 86.712 | 9.32 |          |          |          | 2.788587 |
| Q9D4H8 | Cullin-2 OS=Mus musculus GN=Cul2 PE=1 SV=2                                                               | 1.342282 | 1  | 1  | 1  | 86.821 | 7.01 |          | 2100000  |          | 2.006403 |
| Q810J8 | Zinc finger FYVE domain-containing protein 1 OS=Mus musculus GN=Zfyve1 PE=1 SV=2                         | 1.930502 | 1  | 1  | 1  | 86.884 | 7.34 |          | 360000   |          | 2.293997 |
| Q80YD1 | ATP-dependent RNA helicase SUPV3L1, mitochondrial OS=Mus musculus GN=Supv3l1 PE=1 SV=1                   | 2.053915 | 1  | 1  | 1  | 86.95  | 7.84 | 670000   |          |          | 2.78863  |
| P52479 | Ubiquitin carboxyl-terminal hydrolase 10 OS=Mus musculus GN=Usp10 PE=1 SV=3                              | 3.156566 | 1  | 1  | 1  | 86.968 | 5.17 |          | 660000   |          | 3.591327 |
| Q8K4I3 | Rho guanine nucleotide exchange factor 6 OS=Mus musculus GN=Arhgef6 PE=1 SV=1                            | 9.338521 | 5  | 10 | 3  | 86.996 | 5.87 | 970000   |          | 790000   | 28.66385 |
| Q61410 | cGMP-dependent protein kinase 2 OS=Mus musculus GN=Prkg2 PE=1 SV=1                                       | 1.83727  | 1  | 1  | 1  | 87.03  | 8.22 |          | 3300000  |          | 1.913679 |
| Q99KC8 | von Willebrand factor A domain-containing protein 5A OS=Mus musculus GN=Vwa5a PE=1 SV=2                  | 19.04161 | 11 | 28 | 11 | 87.087 | 6.58 | 7900000  | 7600000  | 6400000  | 81.51134 |

|        |                                                                                                            |          |    |    |    |        |       |          |          |          |          |
|--------|------------------------------------------------------------------------------------------------------------|----------|----|----|----|--------|-------|----------|----------|----------|----------|
| Q9ERG2 | Striatin-3 OS=Mus musculus GN=Strn3 PE=1 SV=1                                                              | 11.55779 | 6  | 12 | 6  | 87.096 | 5.29  | 2900000  | 2700000  | 1900000  | 39.75012 |
| Q8CB77 | Transcription elongation factor B polypeptide 3 OS=Mus musculus GN=Tceb3 PE=1 SV=3                         | 3.492885 | 2  | 4  | 2  | 87.108 | 9.61  | 730000   | 940000   |          | 10.06897 |
| Q80W68 | Kin of IRE-like protein 1 OS=Mus musculus GN=Kirrel PE=1 SV=1                                              | 1.39417  | 1  | 3  | 1  | 87.122 | 5.92  | 820000   | 370000   |          | 7.350197 |
| P42225 | Signal transducer and activator of transcription 1 OS=Mus musculus GN=Stat1 PE=1 SV=1                      | 33.37784 | 21 | 83 | 21 | 87.142 | 5.58  | 46000000 | 43000000 | 34000000 | 271.2705 |
| Q6ZQK5 | Arf-GAP with coiled-coil, ANK repeat and PH domain-containing protein 2 OS=Mus musculus GN=Acap2 PE=1 SV=2 | 1.818182 | 1  | 1  | 1  | 87.156 | 6.68  | 200000   |          |          | 3.087508 |
| P27612 | Phospholipase A-2-activating protein OS=Mus musculus GN=Plaa PE=1 SV=4                                     | 16.62469 | 9  | 18 | 9  | 87.166 | 6.14  | 2900000  | 2200000  | 2400000  | 57.65014 |
| Q640M1 | U3 small nucleolar RNA-associated protein 14 homolog A OS=Mus musculus GN=Utp14a PE=1 SV=1                 | 10.95176 | 6  | 10 | 6  | 87.212 | 9.2   | 1600000  | 1700000  | 1600000  | 27.41562 |
| Q9Z110 | Delta-1-pyrroline-5-carboxylate synthase OS=Mus musculus GN=Aldh18a1 PE=1 SV=2                             | 6.540881 | 4  | 9  | 4  | 87.212 | 7.55  | 3600000  | 3100000  | 4300000  | 26.24345 |
| Q99K01 | Pyridoxal-dependent decarboxylase domain-containing protein 1 OS=Mus musculus GN=Pdxdc1 PE=1 SV=2          | 2.92249  | 2  | 5  | 2  | 87.281 | 5.48  | 2200000  | 1300000  | 840000   | 12.88169 |
| E9PV24 | Fibrinogen alpha chain OS=Mus musculus GN=Fga PE=1 SV=1                                                    | 19.01141 | 14 | 46 | 14 | 87.375 | 6.11  | 16000000 | 18000000 | 17000000 | 134.0857 |
| Q8K327 | Chromosome alignment-maintaining phosphoprotein 1 OS=Mus musculus GN=Champ1 PE=1 SV=1                      | 2.119701 | 1  | 1  | 1  | 87.506 | 7.85  |          |          | 790000   | 3.716861 |
| Q3TCH7 | Cullin-4A OS=Mus musculus GN=Cul4a PE=1 SV=1                                                               | 4.084321 | 3  | 8  | 1  | 87.697 | 8.35  | 290000   |          | 630000   | 22.34386 |
| Q8VHE0 | Translocation protein SEC63 homolog OS=Mus musculus GN=Sec63 PE=1 SV=4                                     | 11.71053 | 7  | 16 | 7  | 87.815 | 5.38  | 1800000  | 3000000  | 2600000  | 46.89792 |
| O70309 | Integrin beta-5 OS=Mus musculus GN=Itgb5 PE=1 SV=2                                                         | 4.636591 | 3  | 6  | 2  | 87.851 | 6.16  | 4000000  | 570000   | 1900000  | 13.96627 |
| Q8VEK3 | Heterogeneous nuclear ribonucleoprotein U OS=Mus musculus GN=Hnrnpu PE=1 SV=1                              | 25.25    | 17 | 60 | 17 | 87.863 | 6.24  | 71000000 | 72000000 | 67000000 | 198.2605 |
| P42227 | Signal transducer and activator of transcription 3 OS=Mus musculus GN=Stat3 PE=1 SV=2                      | 19.87013 | 11 | 28 | 11 | 87.997 | 6.3   | 5400000  | 5400000  | 4200000  | 89.05754 |
| O54692 | Centromere/kinetochore protein zw10 homolog OS=Mus musculus GN=Zw10 PE=1 SV=3                              | 2.310655 | 1  | 3  | 1  | 88.006 | 5.92  |          | 640000   | 280000   | 9.19981  |
| Q7JJ13 | Bromodomain-containing protein 2 OS=Mus musculus GN=Brd2 PE=1 SV=1                                         | 4.135338 | 2  | 4  | 2  | 88.012 | 9.13  | 670000   | 520000   | 760000   | 13.82061 |
| P55288 | Cadherin-11 OS=Mus musculus GN=Cdh11 PE=1 SV=1                                                             | 1.758794 | 1  | 1  | 1  | 88.058 | 4.89  |          |          | 3200000  | 2.49717  |
| P09055 | Integrin beta-1 OS=Mus musculus GN=Itgb1 PE=1 SV=1                                                         | 20.80201 | 16 | 45 | 16 | 88.173 | 5.94  | 13000000 | 15000000 | 11000000 | 134.3998 |
| P97742 | Carnitine O-palmitoyltransferase 1, liver isoform OS=Mus musculus GN=Cpt1a PE=1 SV=4                       | 5.174644 | 2  | 3  | 2  | 88.195 | 8.62  | 1100000  |          | 1400000  | 8.7673   |
| Q8C4J7 | Transducin beta-like protein 3 OS=Mus musculus GN=Tbl3 PE=2 SV=1                                           | 8.2397   | 5  | 9  | 5  | 88.21  | 6.81  | 2300000  | 1600000  | 2200000  | 28.32661 |
| Q8VDF2 | E3 ubiquitin-protein ligase UHRF1 OS=Mus musculus GN=Uhrf1 PE=1 SV=2                                       | 6.393862 | 4  | 8  | 4  | 88.248 | 8.31  | 890000   | 1600000  | 1500000  | 20.11899 |
| A2AR02 | Peptidyl-prolyl cis-trans isomerase G OS=Mus musculus GN=Ppig PE=1 SV=1                                    | 5.053191 | 3  | 7  | 3  | 88.272 | 10.27 | 2300000  | 1900000  | 2500000  | 16.35692 |
| Q3TDD9 | Protein phosphatase 1 regulatory subunit 21 OS=Mus musculus GN=Ppp1r21 PE=1 SV=2                           | 3.076923 | 2  | 3  | 2  | 88.282 | 6.9   |          | 480000   | 1400000  | 7.707717 |
| Q9Z2G6 | Protein sel-1 homolog 1 OS=Mus musculus GN=Sel1l PE=1 SV=2                                                 | 3.670886 | 2  | 6  | 2  | 88.285 | 5.57  | 4900000  | 4000000  | 3800000  | 21.05046 |
| O35218 | Cleavage and polyadenylation specificity factor subunit 2 OS=Mus musculus GN=Cpsf2 PE=1 SV=1               | 4.475703 | 2  | 4  | 2  | 88.327 | 5.11  | 3900000  | 3500000  | 2000000  | 14.31586 |
| Q80Y56 | Rabenosyn-5 OS=Mus musculus GN=Rbsn PE=1 SV=1                                                              | 1.660281 | 1  | 2  | 1  | 88.436 | 5.3   | 740000   |          | 650000   | 5.784811 |
| Q8K4Z5 | Splicing factor 3A subunit 1 OS=Mus musculus GN=Sf3a1 PE=1 SV=1                                            | 16.81416 | 13 | 34 | 13 | 88.489 | 5.22  | 6100000  | 4100000  | 5900000  | 96.36809 |
| O08739 | AMP deaminase 3 OS=Mus musculus GN=Ampd3 PE=1 SV=2                                                         | 5.221932 | 3  | 5  | 3  | 88.596 | 7.33  | 2200000  | 1300000  | 1300000  | 13.37779 |
| Q8R1U1 | Conserved oligomeric Golgi complex subunit 4 OS=Mus musculus GN=Cog4 PE=1 SV=1                             | 1.019108 | 1  | 1  | 1  | 88.604 | 5.15  |          | 380000   |          | 2.21098  |
| O70496 | H(+)/Cl(-) exchange transporter 7 OS=Mus musculus GN=Clcn7 PE=1 SV=1                                       | 2.366127 | 1  | 3  | 1  | 88.656 | 7.27  | 1000000  | 930000   | 820000   | 11.34441 |
| Q91W50 | Cold shock domain-containing protein E1 OS=Mus musculus GN=Csde1 PE=1 SV=1                                 | 15.91479 | 10 | 24 | 10 | 88.735 | 6.37  | 3200000  | 4000000  | 3100000  | 67.66236 |
| Q3B7Z2 | Oxysterol-binding protein 1 OS=Mus musculus GN=Osbp PE=1 SV=3                                              | 3.602484 | 1  | 1  | 1  | 88.741 | 7.2   |          |          | 740000   | 3.509276 |
| Q8BTT6 | Digestive organ expansion factor homolog OS=Mus musculus GN=Diexf PE=2 SV=2                                | 4.274611 | 2  | 3  | 2  | 88.762 | 5.74  |          | 640000   | 650000   | 9.669814 |
| Q62318 | Transcription intermediary factor 1-beta OS=Mus musculus GN=Trim28 PE=1 SV=3                               | 25.77938 | 12 | 50 | 12 | 88.791 | 5.77  | 21000000 | 18000000 | 24000000 | 177.7398 |
| Q9JLV5 | Cullin-3 OS=Mus musculus GN=Cul3 PE=1 SV=1                                                                 | 7.8125   | 5  | 6  | 5  | 88.891 | 8.46  | 3600000  | 2600000  | 2000000  | 16.38105 |
| Q14DK4 | Glycerol-3-phosphate acyltransferase 2, mitochondrial OS=Mus musculus GN=Gpat2 PE=1 SV=3                   | 1.872659 | 1  | 1  | 1  | 89.092 | 6.99  | 2000000  |          |          | 2.010871 |
| Q9EQC5 | N-terminal kinase-like protein OS=Mus musculus GN=Scyl1 PE=1 SV=1                                          | 3.846154 | 2  | 5  | 2  | 89.104 | 6.44  | 4200000  | 1500000  | 4200000  | 15.87103 |
| Q01853 | Transitional endoplasmic reticulum ATPase OS=Mus musculus GN=Vcp PE=1 SV=4                                 | 43.17618 | 28 | 98 | 27 | 89.266 | 5.26  | 44000000 | 35000000 | 37000000 | 321.7463 |
| A2BE28 | Ribosomal biogenesis protein LAS1L OS=Mus musculus GN=Las1l PE=1 SV=1                                      | 5.541237 | 2  | 2  | 2  | 89.359 | 4.44  | 580000   |          | 190000   | 5.468674 |
| Q9QUN7 | Toll-like receptor 2 OS=Mus musculus GN=Tlr2 PE=1 SV=1                                                     | 1.147959 | 1  | 1  | 1  | 89.392 | 6.64  | 210000   |          |          | 2.147707 |
| P25976 | Nucleolar transcription factor 1 OS=Mus musculus GN=Ubtf PE=1 SV=1                                         | 11.37255 | 7  | 12 | 7  | 89.453 | 5.76  | 7600000  | 6400000  | 5700000  | 34.54602 |
| Q8JZQ2 | AFG3-like protein 2 OS=Mus musculus GN=Afg3l2 PE=1 SV=1                                                    | 11.84539 | 9  | 17 | 9  | 89.463 | 8.6   | 1700000  | 3500000  | 2100000  | 50.3158  |
| Q8CCJ3 | E3 UFM1-protein ligase 1 OS=Mus musculus GN=Ufl1 PE=1 SV=2                                                 | 7.440101 | 5  | 9  | 5  | 89.464 | 6.67  | 2400000  | 890000   | 1500000  | 22.34    |
| Q6R891 | Neurabin-2 OS=Mus musculus GN=Ppp1r9b PE=1 SV=1                                                            | 6.119951 | 4  | 12 | 4  | 89.466 | 4.92  | 4500000  | 3200000  | 3000000  | 37.18115 |
| Q9WXT6 | Cullin-1 OS=Mus musculus GN=Cul1 PE=1 SV=1                                                                 | 3.221649 | 2  | 5  | 2  | 89.635 | 8     | 1500000  | 1800000  | 2000000  | 15.53294 |
| Q9JLF6 | Protein-glutamine gamma-glutamyltransferase K OS=Mus musculus GN=Tgm1 PE=1 SV=2                            | 9.815951 | 6  | 14 | 6  | 89.769 | 6.51  | 5300000  | 2700000  | 2700000  | 40.99842 |
| O35601 | FYN-binding protein OS=Mus musculus GN=Fyb PE=1 SV=2                                                       | 7.692308 | 4  | 9  | 4  | 90.001 | 6.98  | 1900000  | 2000000  | 1600000  | 28.86977 |
| Q6PFQ7 | Ras GTPase-activating protein 4 OS=Mus musculus GN=Rasa4 PE=1 SV=1                                         | 1.745636 | 1  | 1  | 1  | 90.004 | 8     |          | 360000   |          | 2.319217 |
| P07742 | Ribonucleoside-diphosphate reductase large subunit OS=Mus musculus GN=Rrm1 PE=1 SV=2                       | 3.409091 | 2  | 2  | 2  | 90.153 | 6.7   | 1900000  |          | 1400000  | 5.75182  |
| Q8BX02 | KN motif and ankyrin repeat domain-containing protein 2 OS=Mus musculus GN=Kank2 PE=1 SV=1                 | 3.795967 | 2  | 3  | 2  | 90.19  | 5.55  |          | 300000   | 710000   | 9.566786 |
| Q9Z0M6 | CD97 antigen OS=Mus musculus GN=Cd97 PE=1 SV=2                                                             | 2.07824  | 1  | 3  | 1  | 90.354 | 7.39  | 240000   | 390000   | 120000   | 8.552752 |

|        |                                                                                                                 |          |    |     |    |        |       |          |          |          |          |   |
|--------|-----------------------------------------------------------------------------------------------------------------|----------|----|-----|----|--------|-------|----------|----------|----------|----------|---|
| Q8C9X6 | Enhancer of polycomb homolog 1 OS=Mus musculus GN=Epc1 PE=1 SV=1                                                | 2.214022 | 1  | 1   | 1  | 90.355 | 8.34  |          | 95000    |          |          | 0 |
| Q9DC23 | Dnal1 homolog subfamily C member 10 OS=Mus musculus GN=Dnajc10 PE=1 SV=2                                        | 4.287516 | 3  | 6   | 3  | 90.525 | 6.96  | 1900000  | 1200000  | 1200000  | 13.86304 |   |
| Q9CS00 | Cactin OS=Mus musculus GN=Cactin PE=1 SV=2                                                                      | 1.943005 | 1  | 3   | 1  | 90.606 | 9.79  | 1200000  | 1400000  | 1200000  | 8.010291 |   |
| P20918 | Plasminogen OS=Mus musculus GN=Plg PE=1 SV=3                                                                    | 16.25616 | 9  | 20  | 9  | 90.749 | 6.6   | 2500000  | 2000000  | 2100000  | 57.09129 |   |
| Q8VCC9 | Spondin-1 OS=Mus musculus GN=Spon1 PE=1 SV=1                                                                    | 2.106568 | 1  | 2   | 1  | 90.761 | 6.02  | 710000   |          | 690000   | 6.324765 |   |
| Q04750 | DNA topoisomerase 1 OS=Mus musculus GN=Top1 PE=1 SV=2                                                           | 15.25424 | 10 | 27  | 10 | 90.819 | 9.33  | 8600000  | 9800000  | 8800000  | 79.96385 |   |
| Q9Z315 | U4/U6.U5 tri-snRNP-associated protein 1 OS=Mus musculus GN=Sart1 PE=1 SV=1                                      | 22.95285 | 14 | 26  | 14 | 90.83  | 5.82  | 3400000  | 3300000  | 3300000  | 82.63136 |   |
| Q9EQ32 | Phosphoinositide 3-kinase adapter protein 1 OS=Mus musculus GN=Pik3ap1 PE=1 SV=1                                | 3.575832 | 2  | 5   | 2  | 90.871 | 5.17  | 960000   | 770000   | 1000000  | 13.35825 |   |
| O35286 | Pre-mRNA-splicing factor ATP-dependent RNA helicase DHX15 OS=Mus musculus GN=Dhx15 PE=1 SV=2                    | 15.59748 | 11 | 22  | 11 | 90.949 | 7.46  | 11000000 | 11000000 | 13000000 | 63.46767 |   |
| Q9Z218 | Dipeptidyl aminopeptidase-like protein 6 OS=Mus musculus GN=Dpp6 PE=1 SV=1                                      | 3.9801   | 3  | 4   | 3  | 91.203 | 6.68  | 1200000  |          |          | 10.41616 |   |
| P70188 | Kinesin-associated protein 3 OS=Mus musculus GN=Kifap3 PE=1 SV=1                                                | 1.513241 | 1  | 2   | 1  | 91.233 | 5.11  | 900000   |          | 720000   | 5.063601 |   |
| P22892 | AP-1 complex subunit gamma-1 OS=Mus musculus GN=Ap1g1 PE=1 SV=3                                                 | 5.596107 | 3  | 8   | 3  | 91.292 | 6.8   | 2000000  | 1600000  | 2000000  | 20.41978 |   |
| Q8JZQ9 | Eukaryotic translation initiation factor 3 subunit B OS=Mus musculus GN=Eif3b PE=1 SV=1                         | 33.12578 | 18 | 46  | 18 | 91.313 | 5.02  | 17000000 | 16000000 | 14000000 | 144.647  |   |
| Q61165 | Sodium/hydrogen exchanger 1 OS=Mus musculus GN=Slc9a1 PE=1 SV=1                                                 | 1.585366 | 1  | 1   | 1  | 91.41  | 7.12  | 1100000  |          |          | 3.071238 |   |
| P24788 | Cyclin-dependent kinase 11B OS=Mus musculus GN=Cdk11b PE=1 SV=2                                                 | 2.295918 | 2  | 4   | 2  | 91.458 | 5.39  | 1500000  | 1400000  | 1100000  | 8.686164 |   |
| P70218 | Mitogen-activated protein kinase kinase kinase 1 OS=Mus musculus GN=Map4k1 PE=1 SV=1                            | 2.297461 | 1  | 1   | 1  | 91.476 | 7.85  |          | 280000   |          | 3.571058 |   |
| P25206 | DNA replication licensing factor MCM3 OS=Mus musculus GN=Mcm3 PE=1 SV=2                                         | 24.38424 | 13 | 30  | 13 | 91.489 | 5.55  | 6900000  | 6600000  | 4800000  | 100.1183 |   |
| Q8BMQ2 | General transcription factor 3C polypeptide 4 OS=Mus musculus GN=Gtf3c4 PE=1 SV=2                               | 2.815177 | 2  | 3   | 2  | 91.554 | 6.73  | 420000   | 630000   | 510000   | 8.666628 |   |
| Q91W96 | Anaphase-promoting complex subunit 4 OS=Mus musculus GN=Anapc4 PE=1 SV=1                                        | 1.486989 | 1  | 3   | 1  | 91.649 | 5.4   | 1100000  | 980000   | 1200000  | 6.959923 |   |
| Q9EQH3 | Vacuolar protein sorting-associated protein 35 OS=Mus musculus GN=Vps35 PE=1 SV=1                               | 10.80402 | 8  | 24  | 8  | 91.655 | 5.44  | 19000000 | 18000000 | 18000000 | 84.74142 |   |
| Q08509 | Epidermal growth factor receptor kinase substrate 8 OS=Mus musculus GN=Eps8 PE=1 SV=2                           | 11.93666 | 8  | 20  | 8  | 91.68  | 7.65  | 1900000  | 1800000  | 2000000  | 61.31636 |   |
| P40645 | Transcription factor SOX-6 OS=Mus musculus GN=Sox6 PE=1 SV=2                                                    | 1.330109 | 1  | 1   | 1  | 91.746 | 7.78  |          |          | 440000   | 1.917879 |   |
| Q80UM7 | Mannosyl-oligosaccharide glucosidase OS=Mus musculus GN=Mogs PE=1 SV=1                                          | 1.438849 | 1  | 2   | 1  | 91.774 | 9     | 1100000  |          | 740000   | 4.467278 |   |
| A2A6Q5 | Cell division cycle protein 27 homolog OS=Mus musculus GN=Cdc27 PE=1 SV=1                                       | 2.181818 | 1  | 1   | 1  | 91.784 | 7.02  | 120000   |          |          | 2.910261 |   |
| Q61548 | Clathrin coat assembly protein AP180 OS=Mus musculus GN=Snap1 PE=1 SV=1                                         | 4.106548 | 4  | 7   | 3  | 91.794 | 4.88  | 5600000  | 3900000  | 2800000  | 16.08554 |   |
| Q3UYV9 | Nuclear cap-binding protein subunit 1 OS=Mus musculus GN=Ncbp1 PE=1 SV=2                                        | 6.075949 | 3  | 8   | 3  | 91.868 | 6.64  | 4200000  | 3300000  | 3500000  | 23.3226  |   |
| Q9DBT5 | AMP deaminase 2 OS=Mus musculus GN=Ampd2 PE=1 SV=1                                                              | 2.506266 | 2  | 2   | 2  | 91.965 | 6.23  | 1900000  |          | 720000   | 4.815529 |   |
| Q61072 | Disintegrin and metalloproteinase domain-containing protein 9 OS=Mus musculus GN=Adam9 PE=1 SV=2                | 5.088757 | 3  | 5   | 3  | 92.02  | 7.47  | 530000   | 1100000  | 890000   | 14.23863 |   |
| Q05722 | Collagen alpha-1(I) chain OS=Mus musculus GN=Col9a1 PE=2 SV=2                                                   | 1.411509 | 1  | 3   | 1  | 92.035 | 8.95  | 1500000  | 1800000  | 1300000  | 8.004802 |   |
| Q5SWD9 | Pre-rRNA-processing protein TSR1 homolog OS=Mus musculus GN=Tsr1 PE=1 SV=1                                      | 3.237858 | 2  | 3   | 2  | 92.047 | 6.99  | 880000   | 780000   |          | 8.979152 |   |
| P15209 | BDNF/NT-3 growth factors receptor OS=Mus musculus GN=Ntrk2 PE=1 SV=1                                            | 1.948843 | 1  | 2   | 1  | 92.074 | 6.55  | 1000000  | 500000   |          | 6.067244 |   |
| Q6ZQF7 | Protein Jade-2 OS=Mus musculus GN=Jade2 PE=1 SV=2                                                               | 2.050663 | 1  | 1   | 1  | 92.116 | 5.77  |          |          |          | 2.289115 |   |
| Q5DTU0 | Actin filament-associated protein 1-like 2 OS=Mus musculus GN=Afap1l2 PE=1 SV=2                                 | 5.575758 | 3  | 4   | 3  | 92.118 | 5.44  | 1400000  | 1500000  | 620000   | 10.58325 |   |
| Q6A068 | Cell division cycle 5-like protein OS=Mus musculus GN=Cdc5l PE=1 SV=2                                           | 10.84788 | 6  | 17  | 6  | 92.133 | 8.02  | 7100000  | 6400000  | 5800000  | 56.31    |   |
| Q3UIA2 | Rho GTPase-activating protein 17 OS=Mus musculus GN=Arhgap17 PE=1 SV=1                                          | 5.555556 | 4  | 8   | 4  | 92.145 | 7.56  | 1700000  | 2300000  | 1700000  | 22.74597 |   |
| Q91YE7 | RNA-binding protein 5 OS=Mus musculus GN=Rbm5 PE=1 SV=1                                                         | 6.01227  | 4  | 7   | 4  | 92.254 | 6.21  | 940000   | 820000   | 620000   | 18.83301 |   |
| Q8R502 | Volume-regulated anion channel subunit LRRC8C OS=Mus musculus GN=Lrrc8c PE=1 SV=1                               | 7.596513 | 5  | 9   | 5  | 92.312 | 7.81  | 1500000  | 3400000  | 3000000  | 23.67236 |   |
| P08113 | Endoplasmic reticulum chaperone protein OS=Mus musculus GN=Hsp90b1 PE=1 SV=2                                    | 41.02244 | 32 | 113 | 30 | 92.418 | 4.82  | 1.1E+08  | 98000000 | 92000000 | 355.4729 |   |
| Q8VD04 | GRIP1-associated protein 1 OS=Mus musculus GN=Gripap1 PE=1 SV=1                                                 | 2.233251 | 1  | 1   | 1  | 92.658 | 5.25  | 480000   |          |          | 3.656302 |   |
| Q80Y81 | Zinc phosphodiesterase ELAC protein 2 OS=Mus musculus GN=Elac2 PE=1 SV=1                                        | 3.008424 | 1  | 1   | 1  | 92.66  | 7.34  | 310000   |          |          | 2.931156 |   |
| Q8BUY8 | G-protein coupled receptor-associated sorting protein 2 OS=Mus musculus GN=Grasp2 PE=1 SV=2                     | 2.058111 | 1  | 1   | 1  | 92.744 | 5.11  |          |          | 390000   | 2.709587 |   |
| Q6ZQ88 | Lysine-specific histone demethylase 1A OS=Mus musculus GN=Kdm1a PE=1 SV=2                                       | 1.289566 | 1  | 2   | 1  | 92.793 | 6.52  | 1700000  | 2000000  |          | 3.869003 |   |
| P97311 | DNA replication licensing factor MCM6 OS=Mus musculus GN=Mcm6 PE=1 SV=1                                         | 12.42387 | 9  | 22  | 9  | 92.809 | 5.45  | 6300000  | 5800000  | 6200000  | 69.20172 |   |
| P97484 | Leukocyte immunoglobulin-like receptor subfamily B member 3 OS=Mus musculus GN=Lilrb3 PE=1 SV=1                 | 1.545779 | 1  | 1   | 1  | 92.995 | 6.87  |          | 550000   |          | 2.444864 |   |
| Q8R313 | Exocyst complex component 6 OS=Mus musculus GN=Exoc6 PE=1 SV=2                                                  | 1.371571 | 1  | 1   | 1  | 93.017 | 6.15  |          |          | 330000   | 2.292065 |   |
| Q8BRN9 | Coiled-coil and C2 domain-containing protein 1B OS=Mus musculus GN=Cc2d1b PE=1 SV=1                             | 5.542453 | 3  | 4   | 3  | 93.034 | 5.41  | 510000   |          | 660000   | 13.21634 |   |
| Q91WG4 | Elongator complex protein 2 OS=Mus musculus GN=Elp2 PE=1 SV=1                                                   | 3.008424 | 1  | 2   | 1  | 93.034 | 5.82  |          | 490000   |          | 7.201355 |   |
| Q62009 | Periostin OS=Mus musculus GN=Postn PE=1 SV=2                                                                    | 5.011933 | 3  | 6   | 3  | 93.085 | 7.53  | 2900000  | 2800000  | 2500000  | 16.32282 |   |
| O35136 | Neural cell adhesion molecule 2 OS=Mus musculus GN=Ncam2 PE=1 SV=1                                              | 7.168459 | 5  | 9   | 5  | 93.145 | 6.07  | 2780000  | 900000   | 700000   | 28.05899 |   |
| Q8VI84 | Nucleolar complex protein 3 homolog OS=Mus musculus GN=Noc3l PE=2 SV=2                                          | 3.593556 | 1  | 1   | 1  | 93.153 | 9.09  |          | 1100000  |          | 4.760808 |   |
| Q3TDQ1 | Dolichyl-diphosphooligosaccharide--protein glycosyltransferase subunit STT3B OS=Mus musculus GN=Stt3b PE=1 SV=2 | 5.467801 | 4  | 10  | 4  | 93.185 | 8.95  | 6400000  | 6900000  | 6300000  | 27.01461 |   |
| A2AJI0 | MAP7 domain-containing protein 1 OS=Mus musculus GN=Map7d1 PE=1 SV=1                                            | 1.77305  | 1  | 2   | 1  | 93.22  | 10.15 | 830000   | 1400000  |          | 5.4966   |   |
| Q8BJ71 | Nuclear pore complex protein Nup93 OS=Mus musculus GN=Nup93 PE=1 SV=1                                           | 11.35531 | 7  | 16  | 7  | 93.222 | 5.72  | 2600000  | 3800000  | 2800000  | 46.56623 |   |

|        |                                                                                                   |          |    |     |    |        |      |          |          |          |          |
|--------|---------------------------------------------------------------------------------------------------|----------|----|-----|----|--------|------|----------|----------|----------|----------|
| Q921C5 | Protein bicaudal D homolog 2 OS=Mus musculus GN=Bicd2 PE=1 SV=1                                   | 1.463415 | 1  | 2   | 1  | 93.334 | 5.44 | 620000   |          | 690000   | 5.027482 |
| Q99LG0 | Ubiquitin carboxyl-terminal hydrolase 16 OS=Mus musculus GN=Usp16 PE=1 SV=2                       | 3.636364 | 2  | 5   | 2  | 93.376 | 6.18 | 470000   | 760000   | 540000   | 14.4128  |
| P70175 | Disks large homolog 3 OS=Mus musculus GN=Dlg3 PE=1 SV=1                                           | 3.180212 | 2  | 2   | 2  | 93.424 | 6.79 | 420000   | 370000   |          | 5.369985 |
| Q9JIK5 | Nucleolar RNA helicase 2 OS=Mus musculus GN=Ddx21 PE=1 SV=3                                       | 26.90952 | 21 | 64  | 21 | 93.493 | 9.11 | 28000000 | 30000000 | 30000000 | 199.4406 |
| Q3UKC1 | Tax1-binding protein 1 homolog OS=Mus musculus GN=Tax1bp1 PE=1 SV=2                               | 1.351351 | 1  | 1   | 1  | 93.572 | 5.33 |          | 640000   |          | 2.203323 |
| P18052 | Receptor-type tyrosine-protein phosphatase alpha OS=Mus musculus GN=Ptptra PE=1 SV=3              | 3.136309 | 2  | 3   | 2  | 93.638 | 7.05 | 1200000  | 580000   |          | 6.559162 |
| P16879 | Tyrosine-protein kinase Fes/Fps OS=Mus musculus GN=Fes PE=1 SV=2                                  | 1.459854 | 1  | 1   | 1  | 93.72  | 6.8  |          |          | 410000   | 2.764599 |
| Q6P2K6 | Serine/threonine-protein phosphatase 4 regulatory subunit 3A OS=Mus musculus GN=Ppp4r3a PE=1 SV=1 | 5.487805 | 3  | 5   | 3  | 93.783 | 4.89 | 1100000  | 1800000  | 700000   | 13.51751 |
| Q3U821 | WD repeat-containing protein 75 OS=Mus musculus GN=Wdr75 PE=1 SV=1                                | 4.216867 | 3  | 7   | 3  | 93.977 | 6.18 | 1000000  | 1300000  | 810000   | 17.7807  |
| Q61316 | Heat shock 70 kDa protein 4 OS=Mus musculus GN=Hspa4 PE=1 SV=1                                    | 34.48276 | 21 | 72  | 21 | 94.073 | 5.24 | 15000000 | 12000000 | 12000000 | 230.5434 |
| Q3TZZ7 | Extended synaptotagmin-2 OS=Mus musculus GN=Esyt2 PE=1 SV=1                                       | 4.615385 | 3  | 5   | 3  | 94.081 | 7.75 | 850000   | 3000000  | 2900000  | 13.59788 |
| Q99K10 | Neuroigin-1 OS=Mus musculus GN=Nlgn1 PE=1 SV=2                                                    | 2.846975 | 2  | 4   | 2  | 94.09  | 5.99 | 1500000  | 770000   | 660000   | 8.680275 |
| Q80W00 | Serine/threonine-protein phosphatase 1 regulatory subunit 10 OS=Mus musculus GN=Ppp1r10 PE=1 SV=1 | 5.18018  | 3  | 4   | 3  | 94.313 | 9.16 | 380000   | 480000   | 600000   | 11.10538 |
| P48722 | Heat shock 70 kDa protein 4L OS=Mus musculus GN=Hspa4l PE=1 SV=2                                  | 9.904535 | 5  | 15  | 5  | 94.322 | 5.74 | 3200000  | 2300000  | 2200000  | 51.51759 |
| Q9DBY8 | Nuclear valosin-containing protein-like OS=Mus musculus GN=Nvl PE=1 SV=1                          | 7.836257 | 5  | 12  | 5  | 94.417 | 6.35 | 1900000  | 1700000  | 2200000  | 34.18116 |
| Q77S13 | Serine/threonine-protein phosphatase 6 regulatory subunit 1 OS=Mus musculus GN=Ppp6r1 PE=1 SV=1   | 3.38785  | 2  | 5   | 2  | 94.468 | 4.64 | 1000000  | 2000000  | 2600000  | 16.84539 |
| Q8K310 | Matrin-3 OS=Mus musculus GN=Matr3 PE=1 SV=1                                                       | 17.8487  | 13 | 37  | 13 | 94.572 | 6.25 | 24000000 | 20000000 | 23000000 | 117.8966 |
| Q922D4 | Serine/threonine-protein phosphatase 6 regulatory subunit 3 OS=Mus musculus GN=Ppp6r3 PE=1 SV=1   | 8.412322 | 5  | 12  | 5  | 94.593 | 4.58 | 1400000  | 1700000  | 1200000  | 34.47278 |
| Q9ER72 | Cysteine--tRNA ligase, cytoplasmic OS=Mus musculus GN=Cars PE=1 SV=2                              | 5.174489 | 3  | 4   | 3  | 94.8   | 6.76 | 1500000  | 1700000  | 1200000  | 10.32994 |
| Q91XM9 | Disks large homolog 2 OS=Mus musculus GN=Dlg2 PE=1 SV=2                                           | 2.934272 | 2  | 2   | 2  | 94.821 | 6.24 | 1300000  | 780000   |          | 5.762625 |
| P35951 | Low-density lipoprotein receptor OS=Mus musculus GN=Ldlr PE=1 SV=2                                | 1.160093 | 1  | 1   | 1  | 94.885 | 5.02 | 310000   |          |          | 2.11833  |
| Q6P542 | ATP-binding cassette sub-family F member 1 OS=Mus musculus GN=Abcf1 PE=1 SV=1                     | 15.05376 | 9  | 26  | 9  | 94.887 | 6.51 | 5100000  | 7200000  | 6100000  | 83.42025 |
| Q8BPM2 | Mitogen-activated protein kinase kinase kinase 5 OS=Mus musculus GN=Map4k5 PE=1 SV=2              | 5.66706  | 3  | 6   | 3  | 94.985 | 7.83 | 1500000  | 920000   | 1600000  | 17.78116 |
| Q60848 | Lymphocyte-specific helicase OS=Mus musculus GN=Hells PE=1 SV=2                                   | 3.532278 | 2  | 3   | 2  | 95.065 | 8    | 760000   | 860000   | 410000   | 9.209435 |
| Q8BZQ7 | Anaphase-promoting complex subunit 2 OS=Mus musculus GN=Anapc2 PE=1 SV=2                          | 1.911589 | 1  | 3   | 1  | 95.247 | 5.31 | 510000   | 800000   | 590000   | 7.28094  |
| P58252 | Elongation factor 2 OS=Mus musculus GN=Eef2 PE=1 SV=2                                             | 34.73193 | 31 | 128 | 30 | 95.253 | 6.83 | 96000000 | 97000000 | 86000000 | 396.6051 |
| Q3UNH4 | G protein-regulated inducer of neurite outgrowth 1 OS=Mus musculus GN=Gprin1 PE=1 SV=2            | 6.437768 | 4  | 6   | 4  | 95.437 | 7.93 | 1000000  | 630000   |          | 17.75328 |
| Q9DBE9 | pre-rRNA processing protein FTSJ3 OS=Mus musculus GN=Ftsj3 PE=1 SV=1                              | 21.47971 | 13 | 29  | 13 | 95.474 | 8.38 | 5200000  | 5700000  | 6100000  | 87.29037 |
| Q8C079 | Striatin-interacting protein 1 OS=Mus musculus GN=Strip1 PE=1 SV=2                                | 3.106332 | 1  | 1   | 1  | 95.524 | 6.25 |          |          | 990000   | 2.87466  |
| Q9DBC3 | Cap-specific mRNA (nucleoside-2'-O-)-methyltransferase 1 OS=Mus musculus GN=Cmtr1 PE=1 SV=1       | 7.407407 | 5  | 11  | 5  | 95.615 | 7.27 | 1400000  | 1900000  | 1600000  | 27.58194 |
| Q8VC03 | Echinoderm microtubule-associated protein-like 3 OS=Mus musculus GN=Emi3 PE=1 SV=1                | 3.67893  | 2  | 2   | 2  | 95.636 | 7.05 | 230000   | 190000   |          | 4.858675 |
| Q61361 | Brevican core protein OS=Mus musculus GN=Bcan PE=1 SV=2                                           | 20.9513  | 14 | 31  | 14 | 95.755 | 4.93 | 11000000 | 6900000  | 5800000  | 90.90433 |
| P56399 | Ubiquitin carboxyl-terminal hydrolase 5 OS=Mus musculus GN=Usp5 PE=1 SV=1                         | 10.60606 | 6  | 13  | 6  | 95.772 | 5.01 | 3700000  | 2600000  | 2500000  | 39.46553 |
| Q4KMM3 | Oxidation resistance protein 1 OS=Mus musculus GN=Oxr1 PE=1 SV=3                                  | 8.083141 | 4  | 10  | 4  | 95.852 | 5.33 | 1800000  | 930000   | 520000   | 32.63655 |
| P48193 | Protein 4.1 OS=Mus musculus GN=Epb41 PE=1 SV=2                                                    | 3.729604 | 2  | 2   | 2  | 95.853 | 5.6  |          | 1200000  |          | 6.094768 |
| P08553 | Neurofilament medium polypeptide OS=Mus musculus GN=Nefm PE=1 SV=4                                | 26.06132 | 19 | 51  | 16 | 95.859 | 4.77 | 17000000 | 6700000  | 6700000  | 150.4688 |
| Q9EQK5 | Major vault protein OS=Mus musculus GN=Mvp PE=1 SV=4                                              | 24.15796 | 17 | 41  | 17 | 95.865 | 5.59 | 12000000 | 11000000 | 12000000 | 113.4151 |
| Q3UFM5 | Nucleolar MIF4G domain-containing protein 1 OS=Mus musculus GN=Nom1 PE=1 SV=2                     | 2.576112 | 1  | 2   | 1  | 95.9   | 8.87 | 360000   |          | 230000   | 5.416507 |
| Q8VDM6 | Heterogeneous nuclear ribonucleoprotein U-like protein 1 OS=Mus musculus GN=Hnrnpul1 PE=1 SV=1    | 7.217695 | 5  | 14  | 5  | 95.942 | 6.58 | 3100000  | 5300000  | 5300000  | 42.22131 |
| Q9Z1X4 | Interleukin enhancer-binding factor 3 OS=Mus musculus GN=Ilf3 PE=1 SV=2                           | 22.16036 | 14 | 38  | 14 | 95.961 | 8.76 | 8600000  | 8300000  | 8900000  | 110.9854 |
| Q9WU78 | Programmed cell death 6-interacting protein OS=Mus musculus GN=Pcdc6ip PE=1 SV=3                  | 15.88032 | 10 | 20  | 10 | 95.964 | 6.52 | 2400000  | 2000000  | 3200000  | 49.97485 |
| P58069 | Ras GTPase-activating protein 2 OS=Mus musculus GN=Rasa2 PE=1 SV=2                                | 2.243211 | 2  | 3   | 2  | 96.34  | 7.59 |          | 2400000  | 1100000  | 7.321538 |
| Q61699 | Heat shock protein 105 kDa OS=Mus musculus GN=Hsp11 PE=1 SV=2                                     | 25.75758 | 14 | 31  | 14 | 96.346 | 5.53 | 5100000  | 4000000  | 4000000  | 88.98017 |
| Q9ESV0 | ATP-dependent RNA helicase DDX24 OS=Mus musculus GN=Ddx24 PE=1 SV=2                               | 7.234539 | 4  | 11  | 4  | 96.369 | 9.36 | 4000000  | 4000000  | 3600000  | 33.11039 |
| Q7TSJ2 | Microtubule-associated protein 6 OS=Mus musculus GN=Map6 PE=1 SV=2                                | 19.31567 | 11 | 29  | 11 | 96.391 | 9.5  | 4300000  | 3100000  | 2400000  | 102.1025 |
| Q9Z1G4 | V-type proton ATPase 116 kDa subunit a isoform 1 OS=Mus musculus GN=Atp6v0a1 PE=1 SV=3            | 14.18355 | 10 | 29  | 10 | 96.404 | 6.76 | 16000000 | 6300000  | 6400000  | 89.55339 |
| Q8BZ03 | Serine/threonine-protein kinase D2 OS=Mus musculus GN=Prkd2 PE=1 SV=1                             | 1.828571 | 1  | 1   | 1  | 96.481 | 6.89 | 480000   |          |          | 2.351743 |
| Q80YR9 | RNA-binding protein 12B-A OS=Mus musculus GN=Rbm12b1 PE=1 SV=2                                    | 1.674641 | 1  | 1   | 1  | 96.535 | 8.07 |          | 420000   |          | 2.549384 |
| Q8CAS9 | Poly [ADP-ribose] polymerase 9 OS=Mus musculus GN=Parp9 PE=1 SV=2                                 | 17.78291 | 13 | 28  | 13 | 96.597 | 7.09 | 4800000  | 5200000  | 6200000  | 78.26091 |
| Q99LI5 | Zinc finger protein 281 OS=Mus musculus GN=Znf281 PE=1 SV=1                                       | 1.791713 | 1  | 1   | 1  | 96.625 | 8.56 |          |          |          | 3.403276 |
| Q8CI94 | Glycogen phosphorylase, brain form OS=Mus musculus GN=Pygb PE=1 SV=3                              | 19.57295 | 13 | 29  | 10 | 96.668 | 6.73 | 8600000  | 6400000  | 6000000  | 78.01214 |
| P49717 | DNA replication licensing factor MCM4 OS=Mus musculus GN=Mcm4 PE=1 SV=1                           | 9.860789 | 8  | 19  | 8  | 96.676 | 7.2  | 5400000  | 4000000  | 4600000  | 58.27928 |
| P70261 | Paladin OS=Mus musculus GN=Pald1 PE=1 SV=1                                                        | 1.280559 | 1  | 1   | 1  | 96.679 | 6.58 |          | 700000   |          | 2.258142 |



|        |                                                                                                       |          |    |    |    |         |       |          |          |          |          |
|--------|-------------------------------------------------------------------------------------------------------|----------|----|----|----|---------|-------|----------|----------|----------|----------|
| Q9WTK5 | Nuclear factor NF-kappa-B p100 subunit OS=Mus musculus GN=Nfkb2 PE=1 SV=1                             | 6.340378 | 4  | 8  | 4  | 96.772  | 6.37  | 2300000  | 2200000  | 1500000  | 28.53224 |
| Q62165 | Dystroglycan OS=Mus musculus GN=Dag1 PE=1 SV=4                                                        | 3.023516 | 2  | 8  | 2  | 96.844  | 8.44  | 2800000  | 2600000  | 3000000  | 21.94866 |
| Q3URD3 | Sarcolemmal membrane-associated protein OS=Mus musculus GN=Slmap PE=1 SV=2                            | 3.786982 | 2  | 3  | 2  | 96.873  | 5.33  | 510000   | 600000   | 690000   | 9.22897  |
| Q60625 | Intercellular adhesion molecule 5 OS=Mus musculus GN=Icam5 PE=1 SV=2                                  | 1.417666 | 1  | 1  | 1  | 96.885  | 6.32  | 1100000  |          |          | 2.769943 |
| Q9DBS9 | Oxysterol-binding protein-related protein 3 OS=Mus musculus GN=Osbp13 PE=1 SV=2                       | 1.637427 | 1  | 1  | 1  | 96.905  | 6.51  | 350000   |          |          | 3.291616 |
| Q9ES28 | Rho guanine nucleotide exchange factor 7 OS=Mus musculus GN=Arhgef7 PE=1 SV=2                         | 6.728538 | 5  | 12 | 3  | 96.995  | 6.8   | 2800000  | 2100000  | 3900000  | 32.73768 |
| P70168 | Importin subunit beta-1 OS=Mus musculus GN=Kpnb1 PE=1 SV=2                                            | 13.69863 | 10 | 24 | 10 | 97.122  | 4.78  | 12000000 | 9600000  | 10000000 | 68.93052 |
| Q3UMC0 | Spermatogenesis-associated protein 5 OS=Mus musculus GN=Spata5 PE=1 SV=2                              | 4.591265 | 3  | 5  | 2  | 97.195  | 8.24  | 1200000  | 380000   |          | 14.95769 |
| Q9WUB3 | Glycogen phosphorylase, muscle form OS=Mus musculus GN=Pygm PE=1 SV=3                                 | 6.769596 | 5  | 9  | 2  | 97.225  | 7.11  | 1500000  |          | 700000   | 20.89617 |
| Q6PIX5 | Inactive rhomboid protein 1 OS=Mus musculus GN=Rhbdf1 PE=1 SV=2                                       | 1.635514 | 1  | 2  | 1  | 97.229  | 8.59  |          |          |          | 4.950971 |
| Q8CJG0 | Protein argonaute-2 OS=Mus musculus GN=Ago2 PE=1 SV=3                                                 | 2.790698 | 2  | 4  | 2  | 97.242  | 9.19  |          | 1800000  | 1400000  | 9.2297   |
| B1AZA5 | Transmembrane protein 245 OS=Mus musculus GN=Tmem245 PE=1 SV=1                                        | 0.913242 | 1  | 2  | 1  | 97.295  | 8.75  |          |          |          | 4.349407 |
| Q9QZE5 | Coatamer subunit gamma-1 OS=Mus musculus GN=Copp1 PE=1 SV=1                                           | 15.44622 | 10 | 16 | 9  | 97.45   | 5.35  | 4900000  | 6300000  | 5400000  | 49.65672 |
| Q5SSL4 | Active breakpoint cluster region-related protein OS=Mus musculus GN=Abr PE=1 SV=1                     | 4.307334 | 2  | 3  | 2  | 97.605  | 6.58  | 2000000  | 2300000  |          | 8.927358 |
| Q9QXK3 | Coatamer subunit gamma-2 OS=Mus musculus GN=Copp2 PE=1 SV=1                                           | 6.08496  | 4  | 10 | 3  | 97.617  | 5.8   | 1600000  | 2200000  | 1800000  | 29.39487 |
| Q8K4L0 | ATP-dependent RNA helicase DDX54 OS=Mus musculus GN=Ddx54 PE=1 SV=1                                   | 1.258581 | 1  | 1  | 1  | 97.687  | 10.01 |          |          | 1300000  | 2.476184 |
| P39053 | Dynamin-1 OS=Mus musculus GN=Dnm1 PE=1 SV=2                                                           | 26.18224 | 20 | 44 | 14 | 97.741  | 7.74  | 23000000 | 12000000 | 11000000 | 137.6536 |
| Q8VHH5 | Arf-GAP with GTPase, ANK repeat and PH domain-containing protein 3 OS=Mus musculus GN=Agap3 PE=1 SV=1 | 1.758242 | 1  | 1  | 1  | 97.905  | 7.75  | 2300000  |          |          | 3.86217  |
| Q8BVG4 | Dipeptidyl peptidase 9 OS=Mus musculus GN=Dpp9 PE=1 SV=2                                              | 1.276102 | 1  | 1  | 1  | 97.939  | 6.65  | 540000   |          |          | 2.300429 |
| Q3V1V3 | ESF1 homolog OS=Mus musculus GN=Esf1 PE=1 SV=1                                                        | 4.970414 | 3  | 4  | 3  | 97.988  | 5.05  | 660000   |          | 1600000  | 10.95707 |
| Q8BGR2 | Volume-regulated anion channel subunit LRRC8D OS=Mus musculus GN=Lrrc8d PE=1 SV=1                     | 2.328289 | 1  | 1  | 1  | 98.05   | 7.44  |          | 560000   |          | 2.220653 |
| P28271 | Cytoplasmic aconitate hydratase OS=Mus musculus GN=Aco1 PE=1 SV=3                                     | 2.474691 | 1  | 1  | 1  | 98.063  | 7.5   |          | 670000   |          | 3.863647 |
| P27870 | Proto-oncogene vav OS=Mus musculus GN=Vav1 PE=1 SV=1                                                  | 2.366864 | 2  | 3  | 2  | 98.074  | 6.51  | 3400000  |          | 1200000  | 9.053568 |
| P15920 | V-type proton ATPase 116 kDa subunit a isoform 2 OS=Mus musculus GN=Atp6v0a2 PE=1 SV=2                | 2.102804 | 1  | 2  | 1  | 98.081  | 6.64  | 880000   |          | 1200000  | 5.601257 |
| P39054 | Dynamin-2 OS=Mus musculus GN=Dnm2 PE=1 SV=2                                                           | 18.62069 | 14 | 36 | 8  | 98.084  | 7.43  | 11000000 | 7400000  | 6200000  | 112.1032 |
| Q00993 | Tyrosine-protein kinase receptor UFO OS=Mus musculus GN=Axl PE=1 SV=2                                 | 3.828829 | 3  | 8  | 3  | 98.128  | 5.74  | 2900000  | 2900000  | 2500000  | 22.46316 |
| Q60953 | Protein PML OS=Mus musculus GN=Pml PE=1 SV=3                                                          | 12.65537 | 7  | 15 | 7  | 98.18   | 5.63  | 4100000  | 3400000  | 4200000  | 48.07614 |
| Q9Z2H5 | Band 4.1-like protein 1 OS=Mus musculus GN=Epb4111 PE=1 SV=2                                          | 5.23322  | 3  | 5  | 3  | 98.254  | 5.62  | 1400000  | 1000000  |          | 15.66906 |
| P42567 | Epidermal growth factor receptor substrate 15 OS=Mus musculus GN=Eps15 PE=1 SV=1                      | 11.14827 | 7  | 10 | 7  | 98.41   | 4.6   | 1700000  | 1400000  | 1500000  | 27.96553 |
| O54931 | A-kinase anchor protein 2 OS=Mus musculus GN=Akap2 PE=1 SV=3                                          | 1.119821 | 1  | 3  | 1  | 98.519  | 5.21  | 1300000  | 1100000  | 760000   | 7.031648 |
| P23819 | Glutamate receptor 2 OS=Mus musculus GN=Gria2 PE=1 SV=3                                               | 2.718007 | 2  | 5  | 2  | 98.599  | 7.39  | 2600000  | 860000   | 890000   | 14.77883 |
| Q8R0Y6 | Cytosolic 10-formyltetrahydrofolate dehydrogenase OS=Mus musculus GN=Aldh111 PE=1 SV=1                | 23.50333 | 16 | 41 | 16 | 98.647  | 5.91  | 9000000  | 6500000  | 5700000  | 127.4996 |
| Q8R3N1 | Nucleolar protein 14 OS=Mus musculus GN=Nop14 PE=1 SV=2                                               | 5.697674 | 4  | 10 | 4  | 98.708  | 7.59  | 1900000  | 1700000  | 2300000  | 31.41555 |
| Q9R1E6 | Ectonucleotide pyrophosphatase/phosphodiesterase family member 2 OS=Mus musculus GN=Enpp2 PE=1 SV=3   | 1.392111 | 1  | 1  | 1  | 98.821  | 7.27  |          |          | 480000   | 2.025453 |
| Q80YR4 | Zinc finger protein 598 OS=Mus musculus GN=Znf598 PE=1 SV=1                                           | 3.854626 | 2  | 3  | 2  | 99.13   | 8.34  | 450000   |          | 470000   | 7.980035 |
| Q60902 | Epidermal growth factor receptor substrate 15-like 1 OS=Mus musculus GN=Eps15l1 PE=1 SV=3             | 14.22271 | 9  | 18 | 9  | 99.248  | 5.02  | 3200000  | 2700000  | 1700000  | 57.42564 |
| Q61704 | Inter-alpha-trypsin inhibitor heavy chain H3 OS=Mus musculus GN=Itih3 PE=1 SV=3                       | 11.81102 | 7  | 20 | 7  | 99.296  | 6.05  | 14000000 | 14000000 | 13000000 | 61.94093 |
| O35551 | Rab GTPase-binding effector protein 1 OS=Mus musculus GN=Rabep1 PE=1 SV=2                             | 2.784223 | 2  | 4  | 2  | 99.462  | 5.01  | 1300000  | 750000   | 910000   | 10.32512 |
| Q8CC35 | Synaptotagmin OS=Mus musculus GN=Synpo PE=1 SV=2                                                      | 1.829925 | 1  | 3  | 1  | 99.49   | 9.42  | 2200000  | 1900000  | 1400000  | 9.826266 |
| B2RY56 | RNA-binding protein 25 OS=Mus musculus GN=Rbm25 PE=1 SV=2                                             | 18.73508 | 12 | 26 | 12 | 99.491  | 6.32  | 6200000  | 6400000  | 9700000  | 91.60327 |
| Q6PCM2 | Integrator complex subunit 6 OS=Mus musculus GN=Ints6 PE=1 SV=1                                       | 1.698754 | 1  | 1  | 1  | 99.598  | 8.78  |          |          | 480000   | 2.427056 |
| Q9R1V6 | Disintegrin and metalloproteinase domain-containing protein 22 OS=Mus musculus GN=Adam22 PE=1 SV=2    | 3.539823 | 2  | 3  | 2  | 99.651  | 7.83  | 470000   | 540000   |          | 8.587853 |
| P15116 | Cadherin-2 OS=Mus musculus GN=Cdh2 PE=1 SV=2                                                          | 3.752759 | 3  | 6  | 3  | 99.734  | 4.78  | 2700000  | 1800000  | 1200000  | 23.97148 |
| O08759 | Ubiquitin-protein ligase E3A OS=Mus musculus GN=Ube3a PE=1 SV=2                                       | 3.103448 | 2  | 6  | 2  | 99.756  | 5.08  | 1100000  | 980000   | 950000   | 15.09674 |
| P97329 | Kinesin-like protein KIF20A OS=Mus musculus GN=Kif20a PE=2 SV=1                                       | 4.735062 | 3  | 4  | 3  | 99.814  | 6.99  | 420000   | 1000000  | 650000   | 10.56443 |
| Q60992 | Guanine nucleotide exchange factor VAV2 OS=Mus musculus GN=Vav2 PE=1 SV=1                             | 1.958525 | 1  | 1  | 1  | 99.851  | 6.84  | 350000   |          |          | 2.480351 |
| Q9DCD2 | Pre-mRNA-splicing factor SYF1 OS=Mus musculus GN=Xab2 PE=1 SV=1                                       | 3.74269  | 3  | 7  | 3  | 99.924  | 6.23  | 840000   | 1500000  | 1000000  | 18.56709 |
| Q60591 | Nuclear factor of activated T-cells, cytoplasmic 2 OS=Mus musculus GN=Nfatc2 PE=1 SV=3                | 1.510248 | 1  | 1  | 1  | 99.957  | 6.76  |          |          | 440000   | 2.166946 |
| Q3TRM8 | Hexokinase-3 OS=Mus musculus GN=Hk3 PE=1 SV=2                                                         | 3.470716 | 2  | 4  | 2  | 100.037 | 5.94  | 1100000  | 780000   |          | 10.19273 |
| P26231 | Catenin alpha-1 OS=Mus musculus GN=Ctnna1 PE=1 SV=1                                                   | 15.23179 | 12 | 25 | 8  | 100.044 | 6.23  | 4600000  | 4400000  | 4300000  | 77.33126 |
| Q811D0 | Disks large homolog 1 OS=Mus musculus GN=Dlg1 PE=1 SV=1                                               | 1.878453 | 1  | 3  | 1  | 100.058 | 5.8   | 5100000  | 2900000  | 2900000  | 9.409895 |
| Q3UVK0 | Endoplasmic reticulum metalloproteinase 1 OS=Mus musculus GN=Ermp1 PE=1 SV=2                          | 1.113586 | 1  | 2  | 1  | 100.084 | 7.49  |          | 820000   | 1100000  | 5.701212 |
| Q8VDM4 | 26S proteasome non-ATPase regulatory subunit 2 OS=Mus musculus GN=Psm2 PE=1 SV=1                      | 11.67401 | 9  | 24 | 9  | 100.139 | 5.17  | 7500000  | 7100000  | 5500000  | 73.9603  |

|        |                                                                                                                             |          |    |     |    |         |      |          |          |          |          |
|--------|-----------------------------------------------------------------------------------------------------------------------------|----------|----|-----|----|---------|------|----------|----------|----------|----------|
| Q9WU40 | Inner nuclear membrane protein Man1 OS=Mus musculus GN=Lemd3 PE=1 SV=2                                                      | 8.686211 | 5  | 10  | 5  | 100.244 | 7.55 | 1000000  | 810000   | 810000   | 36.0643  |
| Q91XY4 | Protocadherin gamma-A4 OS=Mus musculus GN=Pcdhga4 PE=2 SV=1                                                                 | 1.935484 | 1  | 1   | 1  | 100.297 | 4.87 |          |          |          | 2.578254 |
| Q99MR6 | Serrate RNA effector molecule homolog OS=Mus musculus GN=Srrt PE=1 SV=1                                                     | 9.828571 | 8  | 18  | 8  | 100.39  | 5.97 | 4700000  | 5900000  | 7100000  | 51.21757 |
| P56695 | Wolfram1 OS=Mus musculus GN=Wfs1 PE=1 SV=1                                                                                  | 1.235955 | 1  | 3   | 1  | 100.514 | 7.97 | 1200000  | 1100000  | 730000   | 7.39094  |
| Q8K596 | Sodium/calcium exchanger 2 OS=Mus musculus GN=Slc8a2 PE=1 SV=1                                                              | 5.537459 | 4  | 7   | 4  | 100.647 | 5.12 | 3700000  | 2300000  | 1900000  | 19.83476 |
| Q80Y44 | Probable ATP-dependent RNA helicase DDX10 OS=Mus musculus GN=Ddx10 PE=1 SV=2                                                | 8        | 5  | 10  | 5  | 100.676 | 7.75 | 1600000  | 2500000  | 2000000  | 34.50772 |
| Q9D2V7 | Coronin-7 OS=Mus musculus GN=Coro7 PE=1 SV=2                                                                                | 6.724512 | 4  | 8   | 4  | 100.749 | 5.77 | 4800000  | 2300000  | 3000000  | 19.54633 |
| Q8BJL0 | SWI/SNF-related matrix-associated actin-dependent regulator of chromatin subfamily A-like protein 1 OS=Mus musculus GN=Sma1 | 2.307692 | 1  | 2   | 1  | 100.777 | 8.9  | 240000   |          |          | 5.64379  |
| P56960 | Exosome component 10 OS=Mus musculus GN=Exosc10 PE=1 SV=2                                                                   | 1.352875 | 1  | 2   | 1  | 100.879 | 8.29 | 620000   | 620000   |          | 4.490657 |
| Q80UM3 | N-alpha-acetyltransferase 15, NatA auxiliary subunit OS=Mus musculus GN=Naa15 PE=1 SV=1                                     | 9.017341 | 8  | 15  | 8  | 100.897 | 7.62 | 4500000  | 4300000  | 3900000  | 33.7762  |
| Q61702 | Inter-alpha-trypsin inhibitor heavy chain H1 OS=Mus musculus GN=Itih1 PE=1 SV=2                                             | 15.4355  | 10 | 26  | 9  | 101.004 | 6.96 | 11000000 | 9800000  | 9200000  | 77.08621 |
| Q99JP0 | Mitogen-activated protein kinase kinase kinase 3 OS=Mus musculus GN=Map4k3 PE=1 SV=4                                        | 1.901566 | 1  | 1   | 1  | 101.054 | 7.64 | 300000   |          |          | 3.119617 |
| Q80WT5 | Aftiphilin OS=Mus musculus GN=Aftph PE=1 SV=2                                                                               | 1.718582 | 1  | 3   | 1  | 101.068 | 4.5  |          | 480000   | 280000   | 8.131066 |
| Q922D8 | C-1-tetrahydrofolate synthase, cytoplasmic OS=Mus musculus GN=Mthfd1 PE=1 SV=4                                              | 11.01604 | 9  | 22  | 9  | 101.136 | 7.14 | 6100000  | 5800000  | 5000000  | 63.12632 |
| Q0VCM5 | TREMBL:Q0VCM5 (Bos taurus) Similar to Inter-alpha-trypsin inhibitor heavy chain H1                                          | 1.87638  | 2  | 3   | 1  | 101.173 | 7.4  |          |          |          | 6.318283 |
| B9EJ86 | Oxysterol-binding protein-related protein 8 OS=Mus musculus GN=Osbp18 PE=1 SV=1                                             | 2.137233 | 1  | 1   | 1  | 101.205 | 6.96 | 2700000  |          |          | 2.889274 |
| Q68FL6 | Methionine--tRNA ligase, cytoplasmic OS=Mus musculus GN=Mars PE=1 SV=1                                                      | 4.988914 | 4  | 7   | 4  | 101.366 | 7.14 | 1200000  | 4600000  | 780000   | 16.96848 |
| Q6PF93 | Phosphatidylinositol 3-kinase catalytic subunit type 3 OS=Mus musculus GN=Pik3c3 PE=1 SV=1                                  | 1.803833 | 1  | 3   | 1  | 101.423 | 6.73 | 1200000  | 910000   | 780000   | 9.626356 |
| Q6NVE8 | WD repeat-containing protein 44 OS=Mus musculus GN=Wdr44 PE=1 SV=1                                                          | 1.748634 | 1  | 3   | 1  | 101.493 | 5.24 |          | 500000   | 1000000  | 9.714502 |
| P23818 | Glutamate receptor 1 OS=Mus musculus GN=Gria1 PE=1 SV=1                                                                     | 1.653804 | 1  | 1   | 1  | 101.504 | 7.69 | 430000   |          |          | 2.792026 |
| Q8K009 | Mitochondrial 10-formyltetrahydrofolate dehydrogenase OS=Mus musculus GN=Aldh1l2 PE=1 SV=2                                  | 17.98483 | 13 | 24  | 13 | 101.526 | 6.29 | 4600000  | 4200000  | 4000000  | 68.1121  |
| O88508 | DNA (cytosine-5)-methyltransferase 3A OS=Mus musculus GN=Dnmt3a PE=1 SV=2                                                   | 1.982379 | 1  | 3   | 1  | 101.607 | 6.65 | 620000   | 1000000  | 850000   | 10.64777 |
| Q8R5L3 | Vam6/Vps39-like protein OS=Mus musculus GN=Vps39 PE=1 SV=1                                                                  | 3.273138 | 2  | 4   | 2  | 101.628 | 6.99 | 1600000  | 1200000  | 1000000  | 12.53741 |
| Q8R3S6 | Exocyst complex component 1 OS=Mus musculus GN=Exoc1 PE=1 SV=4                                                              | 3.467562 | 3  | 5   | 3  | 101.825 | 6.52 | 880000   | 1200000  | 820000   | 11.5992  |
| Q810A7 | ATP-dependent RNA helicase DDX42 OS=Mus musculus GN=Ddx42 PE=1 SV=3                                                         | 9.472551 | 7  | 21  | 7  | 101.902 | 6.98 | 4100000  | 3800000  | 3900000  | 57.51208 |
| Q9D666 | SUN domain-containing protein 1 OS=Mus musculus GN=Sun1 PE=1 SV=2                                                           | 1.533406 | 1  | 2   | 1  | 101.912 | 6.81 | 280000   |          |          | 3.059823 |
| P97310 | DNA replication licensing factor MCM2 OS=Mus musculus GN=Mcm2 PE=1 SV=3                                                     | 12.27876 | 9  | 20  | 9  | 102.013 | 5.72 | 8100000  | 7900000  | 4300000  | 59.18849 |
| Q78PY7 | Staphylococcal nuclease domain-containing protein 1 OS=Mus musculus GN=Snd1 PE=1 SV=1                                       | 25.05495 | 18 | 54  | 18 | 102.025 | 7.43 | 25000000 | 25000000 | 25000000 | 167.7046 |
| Q62448 | Eukaryotic translation initiation factor 4 gamma 2 OS=Mus musculus GN=Elf4g2 PE=1 SV=2                                      | 10.2649  | 7  | 14  | 7  | 102.041 | 7.14 | 5400000  | 7500000  | 4000000  | 40.55884 |
| P37913 | DNA ligase 1 OS=Mus musculus GN=Lig1 PE=1 SV=2                                                                              | 6.659389 | 4  | 5   | 4  | 102.226 | 6.81 | 410000   | 1800000  | 950000   | 10.24458 |
| Q6KAQ7 | ZZ-type zinc finger-containing protein 3 OS=Mus musculus GN=Zzz3 PE=1 SV=2                                                  | 1.868132 | 1  | 1   | 1  | 102.243 | 5.86 |          | 3200000  |          | 2.588492 |
| Q8BFY9 | Transportin-1 OS=Mus musculus GN=Tnpo1 PE=1 SV=2                                                                            | 13.14031 | 7  | 13  | 7  | 102.291 | 4.98 | 4200000  | 4900000  | 4000000  | 37.05684 |
| O55029 | Coatamer subunit beta' OS=Mus musculus GN=Copb2 PE=1 SV=2                                                                   | 18.34254 | 13 | 25  | 13 | 102.384 | 5.3  | 7200000  | 6400000  | 8000000  | 71.98208 |
| O08528 | Hexokinase-2 OS=Mus musculus GN=Hk2 PE=1 SV=1                                                                               | 12.759   | 9  | 17  | 8  | 102.469 | 6.11 | 3300000  | 3000000  | 2900000  | 51.22593 |
| Q8R3B7 | Bromodomain-containing protein 8 OS=Mus musculus GN=Brd8 PE=1 SV=2                                                          | 1.68244  | 1  | 3   | 1  | 102.546 | 4.72 | 590000   | 520000   | 630000   | 9.184064 |
| Q3UW53 | Protein Niban OS=Mus musculus GN=Fam129a PE=1 SV=2                                                                          | 2.699784 | 2  | 4   | 2  | 102.585 | 4.78 | 3300000  | 2400000  | 2100000  | 13.70858 |
| P46935 | E3 ubiquitin-protein ligase NEDD4 OS=Mus musculus GN=Nedd4 PE=1 SV=3                                                        | 14.99436 | 10 | 28  | 10 | 102.642 | 5.26 | 4300000  | 3300000  | 3400000  | 87.33286 |
| Q8VBT6 | Apolipoprotein B receptor OS=Mus musculus GN=Apobr PE=1 SV=1                                                                | 2.972399 | 2  | 2   | 2  | 102.643 | 4.36 | 890000   |          |          | 5.283274 |
| Q61210 | Rho guanine nucleotide exchange factor 1 OS=Mus musculus GN=Arhgef1 PE=1 SV=2                                               | 14.56522 | 8  | 12  | 8  | 102.741 | 5.6  | 1300000  | 2500000  | 2000000  | 37.56872 |
| Q8BU03 | Periodic tryptophan protein 2 homolog OS=Mus musculus GN=Pwp2 PE=1 SV=1                                                     | 2.829162 | 2  | 7   | 2  | 102.845 | 6.23 | 1100000  | 760000   | 1100000  | 17.85979 |
| Q8C052 | Microtubule-associated protein 1S OS=Mus musculus GN=Map1s PE=1 SV=2                                                        | 1.027749 | 1  | 1   | 1  | 102.875 | 7.02 |          | 490000   |          | 2.027651 |
| P97333 | Neuropilin-1 OS=Mus musculus GN=Nrp1 PE=1 SV=2                                                                              | 5.633803 | 3  | 7   | 3  | 102.935 | 5.9  | 1100000  | 1100000  | 1100000  | 18.65611 |
| Q8VDP4 | Cell cycle and apoptosis regulator protein 2 OS=Mus musculus GN=Ccar2 PE=1 SV=2                                             | 8.56833  | 4  | 8   | 4  | 102.938 | 5.25 | 3100000  | 2300000  | 3100000  | 26.30083 |
| Q7TPR4 | Alpha-actinin-1 OS=Mus musculus GN=Actn1 PE=1 SV=1                                                                          | 37.89238 | 28 | 101 | 15 | 103.004 | 5.38 | 15000000 | 12000000 | 11000000 | 320.1853 |
| Q9EQQ9 | Protein O-GlcNAcase OS=Mus musculus GN=Mgea5 PE=1 SV=2                                                                      | 3.49345  | 3  | 6   | 3  | 103.096 | 4.92 | 2000000  | 3200000  | 1900000  | 14.32758 |
| Q8BG79 | CWF19-like protein 2 OS=Mus musculus GN=Cwf19l2 PE=1 SV=1                                                                   | 1.578354 | 1  | 1   | 1  | 103.108 | 8.5  |          | 71000    |          | 1.896783 |
| P06802 | Ectonucleotide pyrophosphatase/phosphodiesterase family member 1 OS=Mus musculus GN=Enpp1 PE=1 SV=4                         | 3.532009 | 3  | 5   | 3  | 103.109 | 6.6  | 1800000  | 1500000  |          | 12.67027 |
| Q921G8 | Gamma-tubulin complex component 2 OS=Mus musculus GN=Tubgcp2 PE=1 SV=2                                                      | 1.878453 | 1  | 3   | 1  | 103.157 | 6.77 | 930000   | 590000   | 570000   | 9.455177 |
| Q92254 | cGMP-dependent 3',5'-cyclic phosphodiesterase OS=Mus musculus GN=Pde2a PE=1 SV=3                                            | 1.637555 | 1  | 2   | 1  | 103.183 | 5.38 | 1600000  | 680000   |          | 5.765125 |
| Q8CFE4 | SCY1-like protein 2 OS=Mus musculus GN=Scyl2 PE=1 SV=1                                                                      | 3.11828  | 2  | 2   | 2  | 103.251 | 8.02 | 670000   |          | 920000   | 6.500274 |
| Q11011 | Puromycin-sensitive aminopeptidase OS=Mus musculus GN=Npepps PE=1 SV=2                                                      | 2.5      | 2  | 5   | 2  | 103.26  | 5.9  | 2900000  | 2300000  | 3100000  | 15.0087  |
| Q9WV92 | Band 4.1-like protein 3 OS=Mus musculus GN=Epb41l3 PE=1 SV=1                                                                | 22.60495 | 14 | 31  | 12 | 103.274 | 5.31 | 6600000  | 3000000  | 3700000  | 99.48203 |
| Q3UHJ0 | AP2-associated protein kinase 1 OS=Mus musculus GN=Aak1 PE=1 SV=2                                                           | 15.22419 | 9  | 17  | 9  | 103.282 | 6.7  | 3800000  | 3000000  | 2700000  | 53.03912 |

|        |                                                                                                 |           |    |     |    |         |      |          |          |          |          |
|--------|-------------------------------------------------------------------------------------------------|-----------|----|-----|----|---------|------|----------|----------|----------|----------|
| Q6NZL0 | Protein SOGA3 OS=Mus musculus GN=Soga3 PE=1 SV=2                                                | 4.973545  | 4  | 5   | 4  | 103.416 | 6.14 | 1600000  | 320000   | 1300000  | 13.79862 |
| Q99KG3 | RNA-binding protein 10 OS=Mus musculus GN=Rbm10 PE=1 SV=1                                       | 3.978495  | 3  | 7   | 3  | 103.43  | 5.92 | 2400000  | 2000000  | 1700000  | 19.98202 |
| Q3U0S6 | Ras-interacting protein 1 OS=Mus musculus GN=Rasip1 PE=1 SV=3                                   | 3.01769   | 2  | 3   | 2  | 103.494 | 7.83 |          | 340000   | 480000   | 8.10523  |
| Q99MB1 | Toll-like receptor 3 OS=Mus musculus GN=Tlr3 PE=1 SV=2                                          | 1.325967  | 1  | 2   | 1  | 103.606 | 7.93 | 1300000  |          | 1200000  | 5.535624 |
| Q80T85 | DDb1- and CUL4-associated factor 5 OS=Mus musculus GN=Dcaf5 PE=1 SV=2                           | 1.585624  | 1  | 1   | 1  | 103.612 | 5.8  | 150000   |          |          | 2.420544 |
| Q9QZD4 | DNA repair endonuclease XPF OS=Mus musculus GN=Ercc4 PE=1 SV=3                                  | 1.308615  | 1  | 1   | 1  | 103.625 | 7.71 | 590000   |          |          | 2.449982 |
| Q8K1A6 | Coiled-coil and C2 domain-containing protein 1A OS=Mus musculus GN=Cc2d1a PE=1 SV=2             | 0.954401  | 1  | 2   | 1  | 103.634 | 7.84 | 700000   |          | 570000   | 4.321098 |
| Q9ES97 | Reticulon-3 OS=Mus musculus GN=Rtn3 PE=1 SV=2                                                   | 4.253112  | 3  | 8   | 2  | 103.814 | 4.92 | 11000000 | 8000000  | 5900000  | 24.15471 |
| Q35643 | AP-1 complex subunit beta-1 OS=Mus musculus GN=Ap1b1 PE=1 SV=2                                  | 11.45281  | 11 | 27  | 4  | 103.869 | 5.17 | 2000000  | 3400000  | 5700000  | 70.53575 |
| Q9D4H1 | Exocyst complex component 2 OS=Mus musculus GN=Exoc2 PE=1 SV=1                                  | 2.922078  | 2  | 4   | 2  | 103.894 | 7.18 | 660000   | 1300000  | 620000   | 11.23807 |
| P17427 | AP-2 complex subunit alpha-2 OS=Mus musculus GN=Ap2a2 PE=1 SV=2                                 | 11.9403   | 10 | 26  | 8  | 103.951 | 6.93 | 6600000  | 6700000  | 6200000  | 69.20802 |
| Q80UP3 | Diacylglycerol kinase zeta OS=Mus musculus GN=Dgkz PE=1 SV=2                                    | 3.444564  | 2  | 4   | 2  | 103.965 | 8.09 | 740000   | 1200000  |          | 9.934878 |
| Q05895 | Thrombospondin-3 OS=Mus musculus GN=Thbs3 PE=1 SV=2                                             | 2.719665  | 1  | 1   | 1  | 104.053 | 4.64 |          | 870000   |          | 2.491683 |
| P43247 | DNA mismatch repair protein Msh2 OS=Mus musculus GN=Msh2 PE=1 SV=1                              | 3.850267  | 3  | 5   | 3  | 104.085 | 5.96 | 1700000  | 1400000  | 700000   | 13.11218 |
| Q8BRH0 | Transmembrane and TPR repeat-containing protein 3 OS=Mus musculus GN=Tmtc3 PE=1 SV=2            | 2.826087  | 2  | 3   | 2  | 104.131 | 8.53 |          | 1200000  | 1900000  | 6.268331 |
| P70268 | Serine/threonine-protein kinase N1 OS=Mus musculus GN=Pkn1 PE=1 SV=3                            | 1.374207  | 1  | 1   | 1  | 104.346 | 6.27 |          |          |          | 1.926614 |
| Q7TSG2 | RNA polymerase II subunit A C-terminal domain phosphatase OS=Mus musculus GN=Ctdp1 PE=1 SV=1    | 3.229167  | 2  | 3   | 2  | 104.49  | 5.39 | 270000   | 240000   |          | 8.771295 |
| Q3UUQ7 | GPI inositol-deacylase OS=Mus musculus GN=Pgap1 PE=1 SV=3                                       | 1.193059  | 1  | 1   | 1  | 104.511 | 8.91 |          | 550000   |          | 2.153604 |
| Q9DBG3 | AP-2 complex subunit beta OS=Mus musculus GN=Ap2b1 PE=1 SV=1                                    | 12.70011  | 12 | 34  | 5  | 104.516 | 5.38 | 10000000 | 7700000  | 8600000  | 90.28792 |
| A6X935 | Inter alpha-trypsin inhibitor, heavy chain 4 OS=Mus musculus GN=Itih4 PE=1 SV=2                 | 3.078556  | 2  | 4   | 2  | 104.594 | 6.4  | 1300000  | 1100000  | 830000   | 11.55678 |
| Q8C5N3 | Pre-mRNA-splicing factor CWC22 homolog OS=Mus musculus GN=Cwc22 PE=1 SV=1                       | 1.211454  | 1  | 1   | 1  | 104.709 | 8.09 |          |          | 1900000  | 2.434024 |
| Q8K212 | Phosphofurin acidic cluster sorting protein 1 OS=Mus musculus GN=Pacs1 PE=1 SV=2                | 2.601457  | 2  | 5   | 2  | 104.764 | 7.74 | 2100000  | 970000   | 1400000  | 12.83167 |
| P58501 | PAX3- and PAX7-binding protein 1 OS=Mus musculus GN=Paxbp1 PE=1 SV=3                            | 3.155604  | 2  | 3   | 2  | 104.771 | 5.67 |          | 1800000  | 1200000  | 8.924626 |
| P30999 | Catenin delta-1 OS=Mus musculus GN=Ctnnd1 PE=1 SV=2                                             | 10.76759  | 8  | 20  | 8  | 104.86  | 6.87 | 4200000  | 5700000  | 4700000  | 57.82165 |
| P57780 | Alpha-actinin-4 OS=Mus musculus GN=Actn4 PE=1 SV=1                                              | 51.53509  | 40 | 147 | 27 | 104.911 | 5.41 | 29000000 | 25000000 | 26000000 | 494.4208 |
| Q9R1S3 | GPI ethanolamine phosphate transferase 1 OS=Mus musculus GN=Pign PE=2 SV=2                      | 1.503759  | 1  | 2   | 1  | 104.977 | 7.58 | 670000   | 740000   |          | 4.94649  |
| D3YXK2 | Scaffold attachment factor B1 OS=Mus musculus GN=Safb1 PE=1 SV=2                                | 22.518668 | 16 | 49  | 10 | 105.04  | 5.35 | 9400000  | 9400000  | 7400000  | 157.2987 |
| O70589 | Peripheral plasma membrane protein CASK OS=Mus musculus GN=Cask PE=1 SV=2                       | 1.727862  | 1  | 2   | 1  | 105.042 | 6.43 | 730000   | 380000   |          | 5.253078 |
| Q3URQ0 | Testis-expressed sequence 10 protein OS=Mus musculus GN=Tex10 PE=1 SV=1                         | 1.077586  | 1  | 1   | 1  | 105.143 | 9.16 |          | 1200000  |          | 2.432589 |
| Q61301 | Catenin alpha-2 OS=Mus musculus GN=Ctnna2 PE=1 SV=3                                             | 8.814271  | 7  | 14  | 3  | 105.22  | 5.71 | 760000   |          |          | 42.26773 |
| Q8BYC6 | Serine/threonine-protein kinase TAO3 OS=Mus musculus GN=Taok3 PE=1 SV=2                         | 8.017817  | 6  | 8   | 5  | 105.27  | 7.36 | 1600000  | 1200000  | 1200000  | 22.20392 |
| Q8CHP6 | Polyhomeotic-like protein 3 OS=Mus musculus GN=Pbc3 PE=1 SV=2                                   | 1.325178  | 1  | 3   | 1  | 105.287 | 6.6  |          | 1100000  | 1500000  | 8.58216  |
| Q9WVL2 | Signal transducer and activator of transcription 2 OS=Mus musculus GN=Stat2 PE=1 SV=1           | 7.150596  | 6  | 15  | 6  | 105.351 | 5.27 | 6100000  | 6200000  | 5100000  | 40.63093 |
| Q8R1B4 | Eukaryotic translation initiation factor 3 subunit C OS=Mus musculus GN=Eif3c PE=1 SV=1         | 18.22173  | 15 | 49  | 15 | 105.465 | 5.78 | 16000000 | 17000000 | 15000000 | 155.6834 |
| Q0P678 | Zinc finger CCCH domain-containing protein 18 OS=Mus musculus GN=Zc3h18 PE=1 SV=1               | 14.9789   | 7  | 14  | 7  | 105.631 | 7.8  | 4400000  | 4400000  | 5000000  | 56.27529 |
| Q3V3R1 | Monofunctional C1-tetrahydrofolate synthase, mitochondrial OS=Mus musculus GN=Mthfd1l PE=1 SV=2 | 13.81781  | 12 | 23  | 12 | 105.662 | 7.02 | 5400000  | 3300000  | 4000000  | 62.6163  |
| Q3TXS7 | 26S proteasome non-ATPase regulatory subunit 1 OS=Mus musculus GN=Psm1 PE=1 SV=1                | 20.25184  | 13 | 33  | 13 | 105.663 | 5.39 | 8300000  | 6400000  | 6500000  | 109.1407 |
| Q8BHB4 | WD repeat-containing protein 3 OS=Mus musculus GN=Wdr3 PE=1 SV=1                                | 7.430998  | 4  | 9   | 4  | 105.708 | 6.64 | 2200000  | 1900000  | 1400000  | 28.49126 |
| Q8CGK3 | Lon protease homolog, mitochondrial OS=Mus musculus GN=Lonp1 PE=1 SV=2                          | 10.85353  | 8  | 13  | 8  | 105.776 | 6.57 | 3600000  | 4700000  | 4000000  | 40.23609 |
| Q61703 | Inter-alpha-trypsin inhibitor heavy chain H2 OS=Mus musculus GN=Itih2 PE=1 SV=1                 | 11.20507  | 7  | 15  | 7  | 105.861 | 7.27 | 6400000  | 4800000  | 5300000  | 45.31596 |
| Q6Q899 | Probable ATP-dependent RNA helicase DDX58 OS=Mus musculus GN=Ddx58 PE=1 SV=2                    | 6.37149   | 6  | 12  | 6  | 105.908 | 6.65 | 4500000  | 3600000  | 2900000  | 28.91644 |
| Q8K019 | Bcl-2-associated transcription factor 1 OS=Mus musculus GN=Bclaf1 PE=1 SV=2                     | 16.64853  | 11 | 36  | 10 | 105.939 | 9.99 | 14000000 | 16000000 | 16000000 | 110.2447 |
| Q8R3C6 | Probable RNA-binding protein 19 OS=Mus musculus GN=Rbm19 PE=1 SV=1                              | 4.516807  | 3  | 3   | 3  | 106.018 | 6.57 | 170000   |          | 510000   | 7.105948 |
| Q8CGZ0 | Calcium homeostasis endoplasmic reticulum protein OS=Mus musculus GN=Cherp PE=1 SV=1            | 3.418803  | 3  | 7   | 3  | 106.102 | 9.14 | 3300000  | 3300000  | 3300000  | 18.48351 |
| Q6P1H6 | Ankyrin repeat and LEM domain-containing protein 2 OS=Mus musculus GN=Ankle2 PE=1 SV=2          | 4.875519  | 3  | 5   | 3  | 106.132 | 7.37 | 850000   | 970000   |          | 15.77775 |
| Q6P9J9 | Anoctamin-6 OS=Mus musculus GN=Ano6 PE=1 SV=1                                                   | 2.854007  | 2  | 6   | 2  | 106.186 | 6.76 | 2400000  | 2500000  | 2600000  | 17.97032 |
| Q14B71 | Cell division cycle-associated protein 2 OS=Mus musculus GN=Cdca2 PE=1 SV=2                     | 3.156823  | 2  | 2   | 2  | 106.3   | 8.65 |          | 310000   |          | 5.777756 |
| F7BJB9 | MORC family CW-type zinc finger protein 3 OS=Mus musculus GN=Morc3 PE=1 SV=1                    | 1.061571  | 1  | 1   | 1  | 106.455 | 5.68 | 810000   |          |          | 2.102331 |
| Q80TQ2 | Ubiquitin carboxyl-terminal hydrolase CYLD OS=Mus musculus GN=Cyld PE=1 SV=2                    | 2.731092  | 2  | 2   | 2  | 106.517 | 5.63 |          | 1100000  |          | 4.489256 |
| Q9EQH2 | Endoplasmic reticulum aminopeptidase 1 OS=Mus musculus GN=Erap1 PE=1 SV=2                       | 2.150538  | 2  | 3   | 2  | 106.531 | 6.2  | 1000000  | 1900000  | 1900000  | 7.432761 |
| Q3UPF5 | Zinc finger CCCH-type antiviral protein 1 OS=Mus musculus GN=Zc3hav1 PE=1 SV=1                  | 12.15645  | 7  | 15  | 7  | 106.619 | 8.27 | 3600000  | 3700000  | 4100000  | 50.46609 |
| Q8BH74 | Nuclear pore complex protein Nup107 OS=Mus musculus GN=Nup107 PE=1 SV=1                         | 10.90713  | 7  | 17  | 7  | 106.65  | 5.43 | 1800000  | 1800000  | 2800000  | 52.97211 |
| Q91YR7 | Pre-mRNA-processing factor 6 OS=Mus musculus GN=Prpf6 PE=1 SV=1                                 | 13.60255  | 11 | 27  | 11 | 106.655 | 8.09 | 3600000  | 3900000  | 4000000  | 85.63538 |

|        |                                                                                                                 |          |    |    |    |         |       |          |          |          |          |
|--------|-----------------------------------------------------------------------------------------------------------------|----------|----|----|----|---------|-------|----------|----------|----------|----------|
| O08746 | Matrilin-2 OS=Mus musculus GN=Matn2 PE=2 SV=2                                                                   | 21.0251  | 16 | 38 | 16 | 106.678 | 6.58  | 8300000  | 10000000 | 8900000  | 124.3715 |
| Q8BJD1 | Inter-alpha-trypsin inhibitor heavy chain H5 OS=Mus musculus GN=Itih5 PE=1 SV=1                                 | 1.365546 | 1  | 1  | 1  | 106.683 | 8.16  |          |          |          | 2.173194 |
| Q7SIG6 | Arf-GAP with SH3 domain, ANK repeat and PH domain-containing protein 2 OS=Mus musculus GN=Asap2 PE=1 SV=3       | 4.175365 | 3  | 5  | 3  | 106.738 | 6.65  | 730000   | 730000   | 750000   | 14.66166 |
| Q99N50 | Synaptotagmin-like protein 2 OS=Mus musculus GN=Syt12 PE=1 SV=2                                                 | 1.789474 | 1  | 1  | 1  | 106.74  | 6.57  |          | 350000   |          | 3.175174 |
| Q7TQK1 | Integrator complex subunit 7 OS=Mus musculus GN=Ints7 PE=1 SV=1                                                 | 1.345756 | 1  | 2  | 1  | 106.793 | 8.22  | 820000   |          | 970000   | 4.552812 |
| Q52K18 | Serine/arginine repetitive matrix protein 1 OS=Mus musculus GN=Srrm1 PE=1 SV=2                                  | 4.968288 | 4  | 11 | 4  | 106.798 | 11.87 | 9200000  | 11000000 | 9900000  | 32.55108 |
| Q8BGQ7 | Alanine--tRNA ligase, cytoplasmic OS=Mus musculus GN=Aars PE=1 SV=1                                             | 6.714876 | 5  | 8  | 5  | 106.841 | 5.67  | 1400000  | 1900000  | 1800000  | 17.67218 |
| Q8BHN3 | Neutral alpha-D-glucosidase AB OS=Mus musculus GN=Ganab PE=1 SV=1                                               | 10.80508 | 8  | 20 | 8  | 106.844 | 6.06  | 8800000  | 11000000 | 8600000  | 59.84887 |
| Q9Z1Z0 | General vesicular transport factor p115 OS=Mus musculus GN=Uso1 PE=1 SV=2                                       | 22.73201 | 15 | 38 | 15 | 106.917 | 4.93  | 6400000  | 6800000  | 5800000  | 127.6698 |
| Q9JIF7 | Coatmer subunit beta OS=Mus musculus GN=Copb1 PE=1 SV=1                                                         | 13.01154 | 11 | 32 | 11 | 106.998 | 6     | 15000000 | 14000000 | 15000000 | 98.78698 |
| Q8K1R7 | Serine/threonine-protein kinase Nek9 OS=Mus musculus GN=Nek9 PE=1 SV=2                                          | 4.471545 | 2  | 3  | 2  | 107.075 | 5.63  | 1200000  | 940000   |          | 9.60533  |
| Q91Y44 | Bromodomain testis-specific protein OS=Mus musculus GN=Brdt PE=1 SV=3                                           | 1.569038 | 1  | 1  | 1  | 107.188 | 8.97  |          |          |          | 2.063365 |
| B2RXR6 | Serine/threonine-protein phosphatase 6 regulatory ankyrin repeat subunit B OS=Mus musculus GN=Ankrd44 PE=1 SV=1 | 3.222558 | 2  | 4  | 2  | 107.317 | 6.42  | 1800000  | 910000   | 1700000  | 14.89276 |
| Q64737 | Trifunctional purine biosynthetic protein adenosine-3 OS=Mus musculus GN=Gart PE=1 SV=3                         | 3.366337 | 3  | 3  | 3  | 107.436 | 6.68  | 1800000  |          | 1400000  | 6.989492 |
| Q6PGG2 | GEM-interacting protein OS=Mus musculus GN=Gmp PE=1 SV=1                                                        | 3.707518 | 2  | 3  | 2  | 107.478 | 5.77  | 520000   |          | 260000   | 8.720665 |
| Q99K41 | EMILIN-1 OS=Mus musculus GN=Emilin1 PE=1 SV=1                                                                   | 23.69715 | 18 | 52 | 18 | 107.518 | 5.3   | 21000000 | 17000000 | 17000000 | 160.8721 |
| P17426 | AP-2 complex subunit alpha-1 OS=Mus musculus GN=Ap2a1 PE=1 SV=1                                                 | 18.21904 | 14 | 30 | 12 | 107.596 | 7.03  | 6300000  | 4600000  | 3100000  | 75.73462 |
| Q91W86 | Vacuolar protein sorting-associated protein 11 homolog OS=Mus musculus GN=Vps11 PE=1 SV=3                       | 1.594049 | 1  | 3  | 1  | 107.65  | 7.01  | 2000000  | 1400000  | 1300000  | 9.724142 |
| Q8R0S2 | IQ motif and SEC7 domain-containing protein 1 OS=Mus musculus GN=Iqsec1 PE=1 SV=2                               | 8.42872  | 7  | 7  | 5  | 107.948 | 7.14  | 1100000  | 920000   | 770000   | 17.03548 |
| Q569Z6 | Thyroid hormone receptor-associated protein 3 OS=Mus musculus GN=Thrap3 PE=1 SV=1                               | 18.08623 | 14 | 42 | 13 | 108.114 | 10.17 | 8600000  | 14000000 | 9800000  | 124.4565 |
| Q8CIM8 | Integrator complex subunit 4 OS=Mus musculus GN=Ints4 PE=1 SV=1                                                 | 2.489627 | 2  | 5  | 2  | 108.124 | 6.42  | 8900000  | 740000   | 750000   | 13.63656 |
| P17710 | Hexokinase-1 OS=Mus musculus GN=Hk1 PE=1 SV=3                                                                   | 26.07803 | 23 | 60 | 22 | 108.234 | 6.8   | 30000000 | 21000000 | 19000000 | 173.8267 |
| P35123 | Ubiquitin carboxyl-terminal hydrolase 4 OS=Mus musculus GN=Usp4 PE=1 SV=3                                       | 9.87526  | 6  | 10 | 6  | 108.274 | 5.64  | 860000   | 1000000  | 640000   | 30.96517 |
| Q9R1C7 | Pre-mRNA-processing factor 40 homolog A OS=Mus musculus GN=Prpf40a PE=1 SV=1                                    | 7.974816 | 7  | 13 | 7  | 108.412 | 7.69  | 6100000  | 7100000  | 3900000  | 34.54805 |
| Q04857 | Collagen alpha-1(VI) chain OS=Mus musculus GN=Col6a1 PE=1 SV=1                                                  | 18.43902 | 14 | 35 | 14 | 108.422 | 5.36  | 17000000 | 14000000 | 16000000 | 118.7392 |
| Q8C8U0 | Liprin-beta-1 OS=Mus musculus GN=Ppfbp1 PE=1 SV=3                                                               | 11.24871 | 8  | 18 | 8  | 108.472 | 5.49  | 2400000  | 3100000  | 2000000  | 51.46279 |
| Q9DBR1 | 5'-3' exoribonuclease 2 OS=Mus musculus GN=Xrn2 PE=1 SV=1                                                       | 7.255521 | 5  | 15 | 5  | 108.618 | 7.59  | 3500000  | 3200000  | 3300000  | 42.59222 |
| Q9CSH3 | Exosome complex exonuclease RRP44 OS=Mus musculus GN=Dis3 PE=1 SV=4                                             | 6.471816 | 4  | 5  | 4  | 108.769 | 7.53  | 540000   | 650000   | 700000   | 14.74165 |
| Q9EP71 | Ankycorbin OS=Mus musculus GN=Rai14 PE=1 SV=1                                                                   | 7.048008 | 5  | 8  | 5  | 108.785 | 6.27  | 1200000  | 710000   | 1100000  | 21.01977 |
| Q8BG95 | Protein phosphatase 1 regulatory subunit 12B OS=Mus musculus GN=Ppp1r12b PE=1 SV=2                              | 3.278689 | 2  | 5  | 1  | 108.984 | 5.74  | 580000   | 230000   |          | 17.19184 |
| Q8BWO6 | UPF0505 protein C16orf62 homolog OS=Mus musculus PE=1 SV=2                                                      | 1.142264 | 1  | 3  | 1  | 109.007 | 7.31  | 920000   | 790000   |          | 7.221817 |
| P28738 | Kinesin heavy chain isoform 5C OS=Mus musculus GN=Kif5c PE=1 SV=3                                               | 12.02929 | 9  | 19 | 4  | 109.207 | 6.19  | 1400000  | 630000   | 1100000  | 62.91438 |
| O08810 | 116 kDa U5 small nuclear ribonucleoprotein component OS=Mus musculus GN=Eftud2 PE=1 SV=1                        | 22.24511 | 16 | 41 | 15 | 109.291 | 5     | 8800000  | 7900000  | 7800000  | 106.1    |
| Q61768 | Kinesin-1 heavy chain OS=Mus musculus GN=Kif5b PE=1 SV=3                                                        | 28.14123 | 21 | 54 | 16 | 109.484 | 6.44  | 6100000  | 6500000  | 4500000  | 161.6674 |
| Q9JL18 | Squamous cell carcinoma antigen recognized by T-cells 3 OS=Mus musculus GN=Sart3 PE=1 SV=1                      | 7.796258 | 5  | 13 | 5  | 109.55  | 5.24  | 3300000  | 3400000  | 1800000  | 43.26588 |
| P97449 | Aminopeptidase N OS=Mus musculus GN=Anpep PE=1 SV=4                                                             | 13.25052 | 10 | 21 | 10 | 109.582 | 5.9   | 13000000 | 4600000  | 6800000  | 64.167   |
| Q8VE18 | Protein SMG8 OS=Mus musculus GN=Smg8 PE=1 SV=1                                                                  | 2.21998  | 1  | 1  | 1  | 109.597 | 7.77  |          |          |          | 3.484906 |
| O70318 | Band 4.1-like protein 2 OS=Mus musculus GN=Epb41l2 PE=1 SV=2                                                    | 33.19838 | 26 | 71 | 24 | 109.873 | 5.43  | 13000000 | 11000000 | 8900000  | 227.9462 |
| Q3UMY5 | Echinoderm microtubule-associated protein-like 4 OS=Mus musculus GN=Eml4 PE=1 SV=1                              | 5.668016 | 4  | 10 | 4  | 109.958 | 6.54  | 2300000  | 2300000  | 2000000  | 23.89396 |
| Q9EQY0 | Serine/threonine-protein kinase/endoribonuclease IRE1 OS=Mus musculus GN=Ern1 PE=1 SV=1                         | 2.865916 | 2  | 4  | 2  | 110.115 | 6.51  | 770000   | 1500000  | 1700000  | 11.51205 |
| Q80UJ7 | Rab3 GTPase-activating protein catalytic subunit OS=Mus musculus GN=Rab3gap1 PE=1 SV=4                          | 6.116208 | 5  | 11 | 5  | 110.128 | 5.73  | 2300000  | 1500000  | 1700000  | 27.39014 |
| Q8R307 | Vacuolar protein sorting-associated protein 18 homolog OS=Mus musculus GN=Vps18 PE=1 SV=2                       | 0.719424 | 1  | 2  | 1  | 110.149 | 6.09  | 460000   |          | 290000   | 4.141219 |
| Q02788 | Collagen alpha-2(VI) chain OS=Mus musculus GN=Col6a2 PE=1 SV=3                                                  | 12.47582 | 13 | 35 | 13 | 110.266 | 6.42  | 13000000 | 13000000 | 12000000 | 98.04969 |
| Q9ERK4 | Exportin-2 OS=Mus musculus GN=Cse1l PE=1 SV=1                                                                   | 8.444902 | 7  | 10 | 7  | 110.384 | 5.77  | 2500000  | 2600000  | 1500000  | 30.61438 |
| O35382 | Exocyst complex component 4 OS=Mus musculus GN=Exoc4 PE=1 SV=2                                                  | 5.74359  | 4  | 10 | 4  | 110.475 | 6.49  | 1900000  | 1300000  | 1600000  | 32.41617 |
| Q6PH08 | ERC protein 2 OS=Mus musculus GN=Erc2 PE=1 SV=2                                                                 | 0.835946 | 1  | 1  | 1  | 110.571 | 7.03  | 750000   |          |          | 1.874302 |
| Q7TQH0 | Ataxin-2-like protein OS=Mus musculus GN=Atxn2l PE=1 SV=1                                                       | 12.39276 | 10 | 23 | 10 | 110.58  | 8.85  | 1900000  | 3100000  | 2200000  | 63.47925 |
| A2A432 | Cullin-4B OS=Mus musculus GN=Cul4b PE=1 SV=1                                                                    | 13.40206 | 8  | 24 | 6  | 110.63  | 8.37  | 2600000  | 2400000  | 3400000  | 76.17444 |
| Q6NZC7 | SEC23-interacting protein OS=Mus musculus GN=Sec23ip PE=1 SV=2                                                  | 4.90982  | 3  | 7  | 3  | 110.711 | 5.94  | 2000000  | 1800000  | 1800000  | 17.76119 |
| Q8CI71 | Syndetin OS=Mus musculus GN=Vps50 PE=1 SV=2                                                                     | 2.593361 | 2  | 3  | 2  | 111.104 | 6.07  | 640000   | 540000   |          | 4.975998 |
| Q9JKR6 | Hypoxia up-regulated protein 1 OS=Mus musculus GN=Hyou1 PE=1 SV=1                                               | 22.62262 | 17 | 45 | 17 | 111.112 | 5.19  | 8100000  | 7800000  | 7100000  | 131.1697 |
| Q6ZQ03 | Formin-binding protein 4 OS=Mus musculus GN=Fbnp4 PE=1 SV=2                                                     | 1.454898 | 1  | 1  | 1  | 111.177 | 4.73  |          | 200000   |          | 2.711693 |
| P58281 | Dynamin-like 120 kDa protein, mitochondrial OS=Mus musculus GN=Opa1 PE=1 SV=1                                   | 18.125   | 15 | 37 | 15 | 111.27  | 7.55  | 6900000  | 4700000  | 3900000  | 108.6895 |



|        |                                                                                                                   |          |    |     |    |         |       |          |          |          |          |
|--------|-------------------------------------------------------------------------------------------------------------------|----------|----|-----|----|---------|-------|----------|----------|----------|----------|
| Q8C7X2 | ER membrane protein complex subunit 1 OS=Mus musculus GN=Emc1 PE=1 SV=1                                           | 2.306921 | 2  | 3   | 2  | 111.535 | 7.43  | 2400000  | 2200000  | 570000   | 8.610621 |
| Q8BWW9 | Serine/threonine-protein kinase N2 OS=Mus musculus GN=Pkn2 PE=1 SV=3                                              | 2.746694 | 2  | 3   | 2  | 111.537 | 6.32  |          | 930000   | 740000   | 7.46866  |
| Q6PIC6 | Sodium/potassium-transporting ATPase subunit alpha-3 OS=Mus musculus GN=Atp1a3 PE=1 SV=1                          | 39.88154 | 32 | 125 | 18 | 111.62  | 5.41  | 68000000 | 29000000 | 26000000 | 430.8851 |
| Q8OYR5 | Scaffold attachment factor B2 OS=Mus musculus GN=Saftb2 PE=1 SV=2                                                 | 20.48436 | 16 | 39  | 10 | 111.77  | 6.38  | 2500000  | 1900000  | 2900000  | 132.6918 |
| O55098 | Serine/threonine-protein kinase 10 OS=Mus musculus GN=Stk10 PE=1 SV=2                                             | 7.556936 | 6  | 8   | 5  | 111.836 | 7.15  | 320000   | 850000   | 1600000  | 20.15646 |
| Q60875 | Rho guanine nucleotide exchange factor 2 OS=Mus musculus GN=Arhgef2 PE=1 SV=4                                     | 17.86802 | 14 | 25  | 14 | 111.905 | 7.25  | 3900000  | 3800000  | 3700000  | 73.87925 |
| Q6PIE5 | Sodium/potassium-transporting ATPase subunit alpha-2 OS=Mus musculus GN=Atp1a2 PE=1 SV=1                          | 37.54902 | 31 | 123 | 15 | 112.145 | 5.55  | 36000000 | 18000000 | 22000000 | 405.3734 |
| Q9ESZ8 | General transcription factor II-I OS=Mus musculus GN=Gtf2i PE=1 SV=3                                              | 9.418838 | 8  | 14  | 8  | 112.195 | 6.55  | 3500000  | 3000000  | 2200000  | 38.13838 |
| Q8R5H1 | Ubiquitin carboxyl-terminal hydrolase 15 OS=Mus musculus GN=Usp15 PE=1 SV=1                                       | 3.465851 | 3  | 3   | 3  | 112.254 | 5.17  | 1700000  |          | 2100000  | 7.545375 |
| Q8K337 | Type II inositol 1,4,5-trisphosphate 5-phosphatase OS=Mus musculus GN=Inpp5b PE=1 SV=1                            | 1.309164 | 1  | 1   | 1  | 112.69  | 5.64  | 410000   |          |          | 1.868943 |
| Q8BIJ6 | Isoleucine--tRNA ligase, mitochondrial OS=Mus musculus GN=lars2 PE=1 SV=1                                         | 2.865613 | 2  | 3   | 2  | 112.732 | 6.81  | 2600000  | 1900000  | 610000   | 9.146911 |
| Q505D1 | Serine/threonine-protein phosphatase 6 regulatory ankyrin repeat subunit A OS=Mus musculus GN=Ankrd28 PE=1 SV=1   | 1.519468 | 1  | 2   | 1  | 112.826 | 6.27  |          | 990000   | 1200000  | 6.783145 |
| F2Z461 | E3 ISG15--protein ligase Herc6 OS=Mus musculus GN=Herc6 PE=2 SV=1                                                 | 10.06979 | 9  | 19  | 9  | 112.856 | 7.52  | 4200000  | 3200000  | 3100000  | 49.95145 |
| Q8VDN2 | Sodium/potassium-transporting ATPase subunit alpha-1 OS=Mus musculus GN=Atp1a1 PE=1 SV=1                          | 36.26588 | 30 | 122 | 17 | 112.91  | 5.45  | 43000000 | 25000000 | 27000000 | 406.4519 |
| P97386 | DNA ligase 3 OS=Mus musculus GN=Lig3 PE=1 SV=2                                                                    | 3.152709 | 3  | 6   | 3  | 113     | 8.98  | 1000000  | 900000   | 870000   | 16.24038 |
| Q9D071 | MMS19 nucleotide excision repair protein homolog OS=Mus musculus GN=Mms19 PE=1 SV=1                               | 0.775946 | 1  | 2   | 1  | 113.017 | 6.21  | 360000   | 370000   |          | 4.587611 |
| P11103 | Poly [ADP-ribose] polymerase 1 OS=Mus musculus GN=Parp1 PE=1 SV=3                                                 | 11.94472 | 10 | 19  | 10 | 113.028 | 8.95  | 5800000  | 6300000  | 5700000  | 50.86067 |
| Q921M4 | Golgin subfamily A member 2 OS=Mus musculus GN=Golga2 PE=1 SV=3                                                   | 6.406406 | 5  | 11  | 5  | 113.209 | 5     | 1100000  | 1800000  | 1400000  | 30.73696 |
| P12960 | Contactin-1 OS=Mus musculus GN=Cntn1 PE=1 SV=1                                                                    | 17.05882 | 12 | 24  | 12 | 113.317 | 6.16  | 9600000  | 2700000  | 2300000  | 71.82528 |
| Q5DTM8 | E3 ubiquitin-protein ligase BRE1A OS=Mus musculus GN=Rnf20 PE=1 SV=2                                              | 5.344296 | 4  | 8   | 4  | 113.45  | 5.96  | 1800000  | 1500000  | 1700000  | 22.88204 |
| P23249 | Putative helicase MOV-10 OS=Mus musculus GN=Mov10 PE=1 SV=2                                                       | 14.24303 | 11 | 25  | 11 | 113.512 | 9.01  | 4500000  | 4800000  | 5300000  | 70.75963 |
| Q61941 | NAD(P) transhydrogenase, mitochondrial OS=Mus musculus GN=Nnt PE=1 SV=2                                           | 8.287293 | 7  | 14  | 7  | 113.765 | 7.64  | 3600000  | 3500000  | 5900000  | 44.02197 |
| Q8BI66 | FERM domain-containing protein 4A OS=Mus musculus GN=Frdm4a PE=1 SV=2                                             | 1.666667 | 1  | 1   | 1  | 113.809 | 8.92  |          | 850000   |          | 2.881995 |
| Q3U319 | E3 ubiquitin-protein ligase BRE1B OS=Mus musculus GN=Rnf40 PE=1 SV=2                                              | 2.397602 | 2  | 4   | 2  | 113.897 | 6.48  | 1100000  | 980000   | 1000000  | 11.84828 |
| Q64436 | Potassium-transporting ATPase alpha chain 1 OS=Mus musculus GN=Atp4a PE=1 SV=3                                    | 4.259439 | 4  | 16  | 1  | 113.942 | 5.88  |          | 3700000  |          | 51.14547 |
| Q6NZN0 | RNA-binding protein 26 OS=Mus musculus GN=Rbm26 PE=1 SV=2                                                         | 10.96838 | 8  | 14  | 7  | 114.073 | 9.16  | 1600000  | 1700000  | 1600000  | 38.81586 |
| Q80U58 | Pumilio homolog 2 OS=Mus musculus GN=Pum2 PE=1 SV=2                                                               | 2.908068 | 3  | 7   | 3  | 114.243 | 7.08  | 2700000  | 1600000  | 2000000  | 15.53877 |
| Q7TSF1 | Desmoglein-1-beta OS=Mus musculus GN=Dsg1b PE=1 SV=1                                                              | 2.735849 | 3  | 5   | 3  | 114.382 | 4.84  | 740000   |          | 2400000  | 13.38263 |
| O09159 | Lysosomal alpha-mannosidase OS=Mus musculus GN=Man2b1 PE=1 SV=4                                                   | 1.283317 | 1  | 1   | 1  | 114.576 | 8.13  | 830000   |          |          | 3.081783 |
| Q2PFD7 | PH and SEC7 domain-containing protein 3 OS=Mus musculus GN=Psd3 PE=1 SV=2                                         | 5.593057 | 6  | 9   | 6  | 114.651 | 6.24  | 4500000  | 3100000  | 1800000  | 22.46996 |
| Q8C2K5 | RAS protein activator like-3 OS=Mus musculus GN=Rasa3 PE=1 SV=1                                                   | 1.056676 | 1  | 1   | 1  | 114.71  | 8.98  | 490000   |          |          | 2.282007 |
| O5143  | Sarcoplasmic/endoplasmic reticulum calcium ATPase 2 OS=Mus musculus GN=Atp2a2 PE=1 SV=2                           | 22.79693 | 21 | 61  | 21 | 114.784 | 5.34  | 31000000 | 25000000 | 25000000 | 176.2951 |
| Q9DBR7 | Protein phosphatase 1 regulatory subunit 12A OS=Mus musculus GN=Ppp1r12a PE=1 SV=2                                | 17.0068  | 14 | 38  | 13 | 114.927 | 5.49  | 5900000  | 5000000  | 5200000  | 111.8808 |
| P11688 | Integrin alpha-5 OS=Mus musculus GN=Itga5 PE=1 SV=3                                                               | 2.754036 | 2  | 2   | 2  | 114.971 | 5.95  | 3600000  | 320000   |          | 5.602353 |
| Q8VD75 | Huntingtin-interacting protein 1 OS=Mus musculus GN=Hip1 PE=1 SV=2                                                | 5.63654  | 4  | 6   | 3  | 115.13  | 5.43  | 1800000  | 4800000  | 2800000  | 15.64684 |
| Q8K135 | Dyslexia-associated protein KIAA0319-like protein OS=Mus musculus GN=Kiaa0319l PE=1 SV=1                          | 1.431298 | 1  | 1   | 1  | 115.24  | 6.16  | 870000   |          |          | 2.348583 |
| P43406 | Integrin alpha-V OS=Mus musculus GN=Itgav PE=1 SV=2                                                               | 10.24904 | 8  | 13  | 8  | 115.287 | 5.63  | 3100000  | 3600000  | 2100000  | 39.85493 |
| Q8K224 | RNA cytidine acetyltransferase OS=Mus musculus GN=Nat10 PE=1 SV=1                                                 | 5.859375 | 5  | 9   | 5  | 115.346 | 8.32  | 1000000  | 1600000  | 1900000  | 27.34438 |
| Q9Z0H8 | CAP-Gly domain-containing linker protein 2 OS=Mus musculus GN=Clip2 PE=1 SV=2                                     | 8.6915   | 8  | 16  | 6  | 115.84  | 6.48  | 1300000  | 900000   | 1800000  | 42.56106 |
| Q8RF57 | Interferon-induced helicase C domain-containing protein 1 OS=Mus musculus GN=Ifih1 PE=1 SV=1                      | 11.21951 | 8  | 21  | 8  | 115.898 | 6.25  | 2700000  | 3100000  | 2800000  | 65.64256 |
| Q5F2E8 | Serine/threonine-protein kinase TAO1 OS=Mus musculus GN=Taok1 PE=1 SV=1                                           | 4.595405 | 4  | 7   | 3  | 115.977 | 7.55  | 940000   | 440000   | 590000   | 19.71736 |
| Q91YE6 | Importin-9 OS=Mus musculus GN=Ipo9 PE=1 SV=3                                                                      | 2.785783 | 2  | 3   | 2  | 115.978 | 4.81  |          | 1700000  | 1200000  | 8.165702 |
| Q5SYD0 | Unconventional myosin-Id OS=Mus musculus GN=Myo1d PE=1 SV=1                                                       | 2.683897 | 2  | 2   | 2  | 116.007 | 9.41  |          | 560000   | 920000   | 6.555291 |
| Q8BUH8 | Sentrin-specific protease 7 OS=Mus musculus GN=Senp7 PE=1 SV=1                                                    | 2.989392 | 2  | 6   | 2  | 116.273 | 6.52  | 730000   | 640000   | 890000   | 16.05751 |
| P97434 | Myosin phosphatase Rho-interacting protein OS=Mus musculus GN=Mrip PE=1 SV=2                                      | 12.30469 | 8  | 15  | 8  | 116.337 | 6.21  | 1600000  | 1200000  | 1100000  | 43.71472 |
| Q60597 | 2-oxoglutarate dehydrogenase, mitochondrial OS=Mus musculus GN=Ogdh PE=1 SV=3                                     | 20.0391  | 16 | 34  | 16 | 116.375 | 6.83  | 7700000  | 5700000  | 4900000  | 91.82229 |
| Q64727 | Vinculin OS=Mus musculus GN=Vcl PE=1 SV=4                                                                         | 14.1651  | 12 | 26  | 12 | 116.644 | 6     | 4500000  | 4200000  | 4300000  | 77.52469 |
| Q8VDP3 | Protein-methionine sulfoxide oxidase MICAL1 OS=Mus musculus GN=Mical1 PE=1 SV=1                                   | 6.20229  | 5  | 11  | 5  | 116.711 | 6.05  | 1500000  | 2400000  | 2400000  | 35.36162 |
| Q8OX50 | Ubiquitin-associated protein 2-like OS=Mus musculus GN=Ubp2l PE=1 SV=1                                            | 13.00813 | 8  | 15  | 8  | 116.728 | 7.11  | 3800000  | 3700000  | 2600000  | 45.49382 |
| O88532 | Zinc finger RNA-binding protein OS=Mus musculus GN=Zfr PE=1 SV=2                                                  | 9.962756 | 8  | 20  | 8  | 116.786 | 9.04  | 2400000  | 2200000  | 2600000  | 63.57395 |
| Q8CH25 | SAFB-like transcription modulator OS=Mus musculus GN=Sltm PE=1 SV=1                                               | 9.990301 | 6  | 16  | 6  | 116.85  | 7.72  | 3900000  | 5000000  | 4600000  | 50.201   |
| Q8CGY8 | UDP-N-acetylglucosamine--peptide N-acetylglucosaminyltransferase 110 kDa subunit OS=Mus musculus GN=Ogt PE=1 SV=2 | 2.294455 | 2  | 3   | 2  | 116.877 | 6.7   | 1200000  | 1000000  | 580000   | 6.988626 |
| Q61136 | Serine/threonine-protein kinase PRP4 homolog OS=Mus musculus GN=Prpf4b PE=1 SV=3                                  | 7.050645 | 6  | 12  | 6  | 116.904 | 10.23 | 2800000  | 3300000  | 3200000  | 32.71113 |

|        |                                                                                                                          |          |    |     |    |         |      |          |          |          |          |
|--------|--------------------------------------------------------------------------------------------------------------------------|----------|----|-----|----|---------|------|----------|----------|----------|----------|
| P19246 | Neurofilament heavy polypeptide OS=Mus musculus GN=Nefh PE=1 SV=3                                                        | 9.082569 | 9  | 24  | 7  | 116.924 | 5.81 | 4500000  | 1000000  | 1700000  | 66.12466 |
| Q7TMY7 | Importin-8 OS=Mus musculus GN=Ipo8 PE=1 SV=3                                                                             | 1.287129 | 1  | 1   | 1  | 117.003 | 5.16 | 230000   |          |          | 2.853015 |
| Q5I012 | Putative sodium-coupled neutral amino acid transporter 10 OS=Mus musculus GN=Slc38a10 PE=1 SV=2                          | 2.93578  | 2  | 6   | 2  | 117.12  | 5.96 | 1100000  | 980000   | 1300000  | 19.87758 |
| Q5SUA5 | Unconventional myosin-Ig OS=Mus musculus GN=Myo1g PE=1 SV=1                                                              | 10.83984 | 7  | 14  | 7  | 117.153 | 8.59 | 2300000  | 2600000  | 1800000  | 38.05479 |
| Q8C129 | Leucyl-cystinyl aminopeptidase OS=Mus musculus GN=Lnpep PE=1 SV=1                                                        | 16.09756 | 11 | 26  | 11 | 117.229 | 5.96 | 3100000  | 4700000  | 4600000  | 75.46812 |
| Q8K411 | Presequence protease, mitochondrial OS=Mus musculus GN=Pitrm1 PE=1 SV=1                                                  | 2.220077 | 2  | 4   | 2  | 117.297 | 7.2  | 1600000  | 1300000  | 1000000  | 12.66521 |
| P27546 | Microtubule-associated protein 4 OS=Mus musculus GN=Map4 PE=1 SV=3                                                       | 33.77778 | 26 | 110 | 26 | 117.357 | 4.98 | 22000000 | 19000000 | 18000000 | 342.2572 |
| Q569Z5 | Probable ATP-dependent RNA helicase DDX46 OS=Mus musculus GN=Ddx46 PE=1 SV=2                                             | 17.63566 | 12 | 32  | 12 | 117.376 | 9.26 | 6300000  | 6300000  | 6100000  | 109.6434 |
| Q8BKG3 | Inactive tyrosine-protein kinase 7 OS=Mus musculus GN=Ptk7 PE=1 SV=1                                                     | 1.224105 | 1  | 1   | 1  | 117.457 | 6.84 |          | 310000   |          | 2.459316 |
| Q9CZU3 | Superkiller viralicidic activity 2-like 2 OS=Mus musculus GN=Skiv2l2 PE=1 SV=1                                           | 4.326923 | 4  | 6   | 4  | 117.561 | 6.4  |          | 3100000  | 2800000  | 16.01803 |
| Q9JHR7 | Insulin-degrading enzyme OS=Mus musculus GN=Ide PE=1 SV=1                                                                | 2.257115 | 2  | 2   | 2  | 117.697 | 6.54 |          | 920000   |          | 5.62986  |
| Q02053 | Ubiquitin-like modifier-activating enzyme 1 OS=Mus musculus GN=Uba1 PE=1 SV=1                                            | 14.08318 | 12 | 37  | 12 | 117.734 | 5.66 | 10000000 | 9600000  | 8300000  | 123.4122 |
| Q7TPD0 | Integrator complex subunit 3 OS=Mus musculus GN=Ints3 PE=1 SV=2                                                          | 2.59366  | 1  | 3   | 1  | 117.862 | 5.8  | 450000   | 410000   | 320000   | 11.6277  |
| Q8CDM1 | ATPase family AAA domain-containing protein 2 OS=Mus musculus GN=Atad2 PE=1 SV=1                                         | 4.134615 | 3  | 7   | 3  | 117.869 | 6.89 | 1900000  | 1700000  | 1600000  | 25.29371 |
| Q8C7R4 | Ubiquitin-like modifier-activating enzyme 6 OS=Mus musculus GN=Uba6 PE=1 SV=1                                            | 3.703704 | 3  | 7   | 3  | 117.891 | 6.11 | 1000000  | 890000   | 370000   | 20.44052 |
| Q5SXY1 | Cytospin-B OS=Mus musculus GN=Specc1 PE=1 SV=2                                                                           | 3.280225 | 2  | 4   | 2  | 118.029 | 6.64 |          | 770000   | 1100000  | 11.73187 |
| E9Q735 | Ubiquitin conjugation factor E4 A OS=Mus musculus GN=Ube4a PE=1 SV=1                                                     | 1.361868 | 1  | 2   | 1  | 118.123 | 5.33 | 480000   | 1000000  |          | 6.259836 |
| Q6NV83 | U2 snRNP-associated SURP motif-containing protein OS=Mus musculus GN=U2surp PE=1 SV=3                                    | 6.122449 | 3  | 9   | 3  | 118.188 | 8.47 | 4500000  | 5000000  | 4800000  | 38.93649 |
| Q55FM8 | RNA-binding protein 27 OS=Mus musculus GN=Rbm27 PE=1 SV=3                                                                | 4.90566  | 4  | 8   | 3  | 118.479 | 9.19 | 860000   | 1200000  | 820000   | 21.45328 |
| Q3U2P1 | Protein transport protein Sec24A OS=Mus musculus GN=Sec24a PE=1 SV=1                                                     | 1.743119 | 2  | 4   | 2  | 118.707 | 7.83 | 910000   | 960000   | 1200000  | 9.424447 |
| F8VPU2 | FERM, RhoGEF and pleckstrin domain-containing protein 1 OS=Mus musculus GN=Farp1 PE=1 SV=1                               | 10.68702 | 7  | 17  | 7  | 118.801 | 7.88 | 2900000  | 2300000  | 1800000  | 51.57301 |
| Q9JME5 | AP-3 complex subunit beta-2 OS=Mus musculus GN=Ap3b2 PE=1 SV=2                                                           | 5.268022 | 4  | 7   | 4  | 119.118 | 5.63 | 1500000  | 710000   | 450000   | 18.67387 |
| Q8VI75 | Importin-4 OS=Mus musculus GN=Ipo4 PE=1 SV=1                                                                             | 1.571165 | 1  | 3   | 1  | 119.198 | 5.03 | 1600000  | 1700000  | 1400000  | 9.945671 |
| Q924T7 | E3 ubiquitin-protein ligase RNF31 OS=Mus musculus GN=Rnf31 PE=1 SV=2                                                     | 1.688555 | 1  | 1   | 1  | 119.238 | 6.52 |          | 360000   |          | 1.90325  |
| Q8RAU7 | Leucine zipper protein 1 OS=Mus musculus GN=Luzp1 PE=1 SV=2                                                              | 1.310861 | 1  | 1   | 1  | 119.239 | 7.99 |          |          | 270000   | 2.984565 |
| Q69ZS0 | E3 ubiquitin-protein ligase PDZRN3 OS=Mus musculus GN=Pdzrn3 PE=1 SV=3                                                   | 1.034807 | 1  | 2   | 1  | 119.326 | 6.05 |          | 750000   | 560000   | 4.973473 |
| P13595 | Neural cell adhesion molecule 1 OS=Mus musculus GN=Ncam1 PE=1 SV=3                                                       | 14.97758 | 14 | 38  | 14 | 119.353 | 4.83 | 15000000 | 8100000  | 7000000  | 112.4875 |
| Q9JKY5 | Huntingtin-interacting protein 1-related protein OS=Mus musculus GN=Hip1r PE=1 SV=2                                      | 4.775281 | 4  | 7   | 4  | 119.353 | 6.52 | 940000   | 900000   | 1200000  | 18.65722 |
| Q9EPL8 | Importin-7 OS=Mus musculus GN=Ipo7 PE=1 SV=2                                                                             | 3.853565 | 3  | 10  | 3  | 119.41  | 4.82 | 1300000  | 1500000  | 1200000  | 29.09492 |
| Q91V92 | ATP-citrate synthase OS=Mus musculus GN=Acly PE=1 SV=1                                                                   | 11.09074 | 10 | 21  | 10 | 119.651 | 7.44 | 4400000  | 3900000  | 3800000  | 52.37289 |
| Q920B9 | FACT complex subunit SPT16 OS=Mus musculus GN=Supt16h PE=1 SV=2                                                          | 17.57402 | 17 | 39  | 17 | 119.749 | 5.66 | 8100000  | 11000000 | 11000000 | 111.3034 |
| B1AQJ2 | Ubiquitin carboxyl-terminal hydrolase 36 OS=Mus musculus GN=Usp36 PE=1 SV=1                                              | 1.730419 | 1  | 1   | 1  | 119.839 | 9.82 |          | 120000   |          | 2.331981 |
| Q640N3 | Rho GTPase-activating protein 30 OS=Mus musculus GN=Arhgap30 PE=1 SV=3                                                   | 3.269755 | 2  | 2   | 2  | 120.04  | 4.84 | 570000   | 270000   |          | 5.68298  |
| P53569 | CCAAT/enhancer-binding protein zeta OS=Mus musculus GN=Cebpz PE=1 SV=2                                                   | 6.749049 | 5  | 11  | 5  | 120.187 | 5.74 | 1200000  | 980000   | 1200000  | 32.04517 |
| Q62036 | Centrosomal protein of 131 kDa OS=Mus musculus GN=Cep131 PE=1 SV=2                                                       | 1.132075 | 1  | 1   | 1  | 120.24  | 8.72 |          | 260000   |          | 2.281698 |
| Q9JIS8 | Solute carrier family 12 member 4 OS=Mus musculus GN=Slc12a4 PE=1 SV=2                                                   | 0.737327 | 1  | 3   | 1  | 120.546 | 6.67 | 1800000  | 3500000  | 3700000  | 7.103465 |
| Q3V0C5 | Ubiquitin carboxyl-terminal hydrolase 48 OS=Mus musculus GN=Usp48 PE=1 SV=2                                              | 1.61597  | 1  | 3   | 1  | 120.554 | 6.25 | 1100000  | 1300000  | 1000000  | 12.22654 |
| O55201 | Transcription elongation factor SPT5 OS=Mus musculus GN=Supt5h PE=1 SV=1                                                 | 17.28281 | 11 | 26  | 11 | 120.589 | 5.05 | 2500000  | 2500000  | 2500000  | 88.41743 |
| A2AWA9 | Rab GTPase-activating protein 1 OS=Mus musculus GN=Rabgap1 PE=1 SV=1                                                     | 1.12782  | 1  | 3   | 1  | 120.722 | 5.25 | 830000   |          | 770000   | 8.894099 |
| Q91Z67 | SLIT-ROBO Rho GTPase-activating protein 2 OS=Mus musculus GN=Srgap2 PE=1 SV=2                                            | 2.054155 | 2  | 2   | 2  | 120.723 | 6.64 |          | 640000   |          | 4.841993 |
| Q9Z1R2 | Large proline-rich protein BAG6 OS=Mus musculus GN=Bag6 PE=1 SV=1                                                        | 0.693241 | 1  | 1   | 1  | 120.962 | 5.71 |          |          | 790000   | 1.994192 |
| Q6ZQ58 | La-related protein 1 OS=Mus musculus GN=Larp1 PE=1 SV=3                                                                  | 2.238806 | 2  | 4   | 2  | 121.05  | 8.79 | 6300000  | 3500000  | 4800000  | 11.618   |
| Q61147 | Ceruloplasmin OS=Mus musculus GN=Cp PE=1 SV=2                                                                            | 6.409048 | 6  | 13  | 6  | 121.074 | 5.85 | 2000000  | 2300000  | 2700000  | 33.38637 |
| Q8CCP0 | Nuclear export mediator factor Nurf OS=Mus musculus GN=Nurf PE=1 SV=2                                                    | 3.383459 | 3  | 3   | 3  | 121.112 | 6.8  | 2300000  | 950000   |          | 8.792335 |
| O88343 | Electrogenic sodium bicarbonate cotransporter 1 OS=Mus musculus GN=Slc4a4 PE=1 SV=2                                      | 1.204819 | 1  | 1   | 1  | 121.406 | 6.84 | 1000000  |          |          | 2.614978 |
| Q6R0H7 | Guanine nucleotide-binding protein G(s) subunit alpha isoforms XLas OS=Mus musculus GN=Gnas PE=1 SV=1                    | 7.855252 | 7  | 19  | 6  | 121.429 | 4.81 | 12000000 | 7100000  | 9100000  | 51.09094 |
| Q3U7R1 | Extended synaptotagmin-1 OS=Mus musculus GN=Esyt1 PE=1 SV=2                                                              | 14.74359 | 14 | 34  | 14 | 121.478 | 5.95 | 6800000  | 6900000  | 7000000  | 91.1161  |
| Q91ZW3 | SWI/SNF-related matrix-associated actin-dependent regulator of chromatin subfamily A member 5 OS=Mus musculus GN=Smarca5 | 11.79829 | 11 | 29  | 11 | 121.55  | 8.15 | 18000000 | 17000000 | 19000000 | 93.24235 |
| Q6A0A9 | Constitutive coactivator of PPAR-gamma-like protein 1 OS=Mus musculus GN=FAM120A PE=1 SV=2                               | 11.69065 | 9  | 19  | 9  | 121.569 | 8.92 | 7600000  | 5000000  | 6800000  | 62.73837 |
| Q8BTI9 | Phosphatidylinositol 4,5-bisphosphate 3-kinase catalytic subunit beta isoform OS=Mus musculus GN=Pik3cb PE=1 SV=2        | 1.409774 | 1  | 1   | 1  | 121.633 | 7.09 |          |          | 400000   | 3.182452 |
| Q99ME2 | WD repeat-containing protein 6 OS=Mus musculus GN=Wdr6 PE=1 SV=1                                                         | 1.244444 | 1  | 1   | 1  | 121.82  | 6.98 |          | 330000   |          | 3.161793 |
| Q9WTI7 | Unconventional myosin-Ic OS=Mus musculus GN=Myo1c PE=1 SV=2                                                              | 6.020696 | 4  | 4   | 4  | 121.868 | 9.35 | 1200000  | 1100000  |          | 10.42216 |
| Q9JL26 | Formin-like protein 1 OS=Mus musculus GN=Fmnl1 PE=1 SV=1                                                                 | 3.199269 | 3  | 6   | 3  | 121.983 | 5.82 | 1500000  | 1000000  | 1100000  | 16.43171 |

|        |                                                                                                           |          |    |    |    |         |      |          |          |          |          |
|--------|-----------------------------------------------------------------------------------------------------------|----------|----|----|----|---------|------|----------|----------|----------|----------|
| Q61739 | Integrin alpha-6 OS=Mus musculus GN=Itga6 PE=1 SV=3                                                       | 6.782768 | 5  | 14 | 5  | 122.082 | 7.03 | 2400000  | 2400000  | 2000000  | 40.04307 |
| Q80U87 | Ubiquitin carboxyl-terminal hydrolase 8 OS=Mus musculus GN=Usp8 PE=1 SV=2                                 | 1.388889 | 1  | 2  | 1  | 122.534 | 8.47 | 590000   | 900000   |          | 7.864779 |
| P51829 | Adenylate cyclase type 7 OS=Mus musculus GN=Adcy7 PE=2 SV=2                                               | 1.637853 | 1  | 1  | 1  | 122.628 | 7.87 |          |          | 260000   | 2.251718 |
| Q9Z1T1 | AP-3 complex subunit beta-1 OS=Mus musculus GN=Ap3b1 PE=1 SV=2                                            | 5.61086  | 6  | 15 | 6  | 122.664 | 5.66 | 3300000  | 3600000  | 3100000  | 38.54547 |
| Q8K298 | Actin-binding protein anillin OS=Mus musculus GN=Anln PE=1 SV=2                                           | 7.93934  | 7  | 12 | 7  | 122.718 | 6.98 | 1400000  | 1800000  | 1700000  | 36.57955 |
| P97496 | SWI/SNF complex subunit SMARCC1 OS=Mus musculus GN=Smarrc1 PE=1 SV=2                                      | 12.40942 | 10 | 26 | 7  | 122.813 | 5.73 | 3300000  | 3000000  | 1700000  | 78.70669 |
| Q3TBD2 | Minor histocompatibility protein HA-1 OS=Mus musculus GN=Hmha1 PE=1 SV=2                                  | 4.032258 | 4  | 10 | 4  | 122.825 | 5.94 | 890000   | 860000   | 1200000  | 35.08237 |
| Q6P5F9 | Exportin-1 OS=Mus musculus GN=Xpo1 PE=1 SV=1                                                              | 8.496732 | 8  | 14 | 8  | 123.013 | 6.07 | 3300000  | 5200000  | 4900000  | 42.52028 |
| A2APV2 | Formin-like protein 2 OS=Mus musculus GN=Fmnl2 PE=1 SV=2                                                  | 1.289134 | 1  | 1  | 1  | 123.024 | 7.53 | 950000   |          |          | 2.286639 |
| P34152 | Focal adhesion kinase 1 OS=Mus musculus GN=Ptk2 PE=1 SV=3                                                 | 3.761468 | 4  | 6  | 4  | 123.458 | 6.68 | 8900000  | 1000000  |          | 14.25843 |
| Q8BK5  | Importin-5 OS=Mus musculus GN=Ipo5 PE=1 SV=3                                                              | 7.383774 | 5  | 14 | 5  | 123.511 | 4.93 | 3500000  | 4000000  | 3400000  | 48.16071 |
| Q8CGF7 | Transcription elongation regulator 1 OS=Mus musculus GN=Tcerg1 PE=1 SV=2                                  | 8.727273 | 10 | 22 | 10 | 123.71  | 8.65 | 2800000  | 3100000  | 3000000  | 60.42112 |
| P52431 | DNA polymerase delta catalytic subunit OS=Mus musculus GN=Pold1 PE=1 SV=2                                 | 1.538462 | 1  | 2  | 1  | 123.712 | 7.61 | 2700000  | 2200000  |          | 7.223793 |
| Q9EPK7 | Exportin-7 OS=Mus musculus GN=Xpo7 PE=1 SV=3                                                              | 1.287948 | 1  | 1  | 1  | 123.731 | 6.38 |          |          | 530000   | 3.008579 |
| Q9EPU0 | Regulator of nonsense transcripts 1 OS=Mus musculus GN=Upf1 PE=1 SV=2                                     | 10.67616 | 9  | 20 | 9  | 123.889 | 6.61 | 3600000  | 3500000  | 3600000  | 54.60206 |
| Q80U95 | Ubiquitin-protein ligase E3C OS=Mus musculus GN=Ube3c PE=1 SV=2                                           | 0.923361 | 1  | 1  | 1  | 123.896 | 6.39 |          |          |          | 1.806488 |
| P59328 | WD repeat and HMG-box DNA-binding protein 1 OS=Mus musculus GN=Wdhd1 PE=1 SV=2                            | 1.253357 | 1  | 1  | 1  | 124.176 | 5.63 |          | 690000   |          | 2.399252 |
| Q9Z103 | Activity-dependent neuroprotector homeobox protein OS=Mus musculus GN=Adnp PE=1 SV=2                      | 5.505415 | 5  | 11 | 5  | 124.229 | 6.86 | 2200000  | 2500000  | 2200000  | 27.80571 |
| O08532 | Voltage-dependent calcium channel subunit alpha-2/delta-1 OS=Mus musculus GN=Cacna2d1 PE=1 SV=1           | 2.629193 | 2  | 2  | 2  | 124.551 | 5.3  | 1800000  |          |          | 5.450298 |
| O70566 | Protein diaphanous homolog 2 OS=Mus musculus GN=Diaph2 PE=1 SV=2                                          | 2.003643 | 2  | 2  | 2  | 124.792 | 6.92 | 7000000  |          | 850000   | 5.242061 |
| Q9Z3Q2 | StAR-related lipid transfer protein 13 OS=Mus musculus GN=Stard13 PE=1 SV=5                               | 2.246181 | 2  | 3  | 2  | 124.982 | 7.53 | 400000   | 350000   | 560000   | 6.704082 |
| Q5NC05 | Transcription termination factor 2 OS=Mus musculus GN=Ttf2 PE=1 SV=2                                      | 1.142355 | 1  | 3  | 1  | 125.452 | 8.9  | 320000   | 380000   | 400000   | 6.827679 |
| Q8K394 | Inactive phospholipase C-like protein 2 OS=Mus musculus GN=Picl2 PE=1 SV=2                                | 1.241135 | 1  | 1  | 1  | 125.692 | 6.92 | 630000   |          |          | 1.8608   |
| Q8COD5 | Elongation factor-like GTPase 1 OS=Mus musculus GN=Efl1 PE=1 SV=1                                         | 5.767524 | 4  | 4  | 4  | 125.697 | 6.16 | 2700000  | 340000   | 580000   | 10.62759 |
| Q9Z2V5 | Histone deacetylase 6 OS=Mus musculus GN=Hdac6 PE=1 SV=3                                                  | 1.218451 | 1  | 3  | 1  | 125.706 | 5.78 | 1200000  | 1000000  | 1000000  | 10.32543 |
| P70248 | Unconventional myosin-I f OS=Mus musculus GN=Myo1f PE=1 SV=1                                              | 5.186533 | 5  | 12 | 3  | 125.868 | 8.92 | 2300000  | 1900000  | 1200000  | 32.6337  |
| P35601 | Replication factor C subunit 1 OS=Mus musculus GN=Rfc1 PE=1 SV=2                                          | 6.189213 | 5  | 12 | 5  | 125.907 | 9.33 | 1600000  | 1600000  | 1500000  | 39.83547 |
| Q91V14 | Solute carrier family 12 member 5 OS=Mus musculus GN=Slc12a5 PE=1 SV=2                                    | 3.866432 | 4  | 7  | 4  | 126.189 | 6.74 | 4800000  | 2300000  | 1300000  | 16.84027 |
| Q8VI93 | 2'-5'-oligoadenylate synthase 3 OS=Mus musculus GN=Oas3 PE=1 SV=1                                         | 2.811951 | 2  | 5  | 2  | 126.253 | 8.72 | 2000000  | 1500000  | 1600000  | 13.94967 |
| Q99P72 | Reticulon-4 OS=Mus musculus GN=Rtn4 PE=1 SV=2                                                             | 14.80207 | 10 | 27 | 10 | 126.535 | 4.54 | 19000000 | 14000000 | 12000000 | 93.06523 |
| Q9ESC8 | AF4/FMR2 family member 4 OS=Mus musculus GN=Aff4 PE=1 SV=1                                                | 1.12069  | 1  | 1  | 1  | 126.562 | 9.36 |          |          | 370000   | 2.163867 |
| Q8CHC8 | ADNP homeobox protein 2 OS=Mus musculus GN=Adnp2 PE=2 SV=2                                                | 1.716738 | 1  | 2  | 1  | 126.687 | 9    |          | 690000   |          | 5.607748 |
| E9Q634 | Unconventional myosin-I e OS=Mus musculus GN=Myo1e PE=1 SV=1                                              | 3.161698 | 3  | 10 | 1  | 126.738 | 9.07 | 350000   | 460000   | 430000   | 32.82359 |
| Q3U1J4 | DNA damage-binding protein 1 OS=Mus musculus GN=Ddb1 PE=1 SV=2                                            | 2.45614  | 2  | 5  | 2  | 126.772 | 5.26 | 720000   | 2300000  | 490000   | 15.4431  |
| Q9Z4W5 | Structural maintenance of chromosomes protein 6 OS=Mus musculus GN=Smc6 PE=1 SV=1                         | 1.002735 | 1  | 1  | 1  | 127.118 | 7.17 | 720000   |          |          | 1.85557  |
| Q9QWY8 | Arf-GAP with SH3 domain, ANK repeat and PH domain-containing protein 1 OS=Mus musculus GN=Asap1 PE=1 SV=2 | 1.307759 | 1  | 2  | 1  | 127.342 | 7.64 | 1300000  | 1500000  |          | 6.777847 |
| P05555 | Integrin alpha-M OS=Mus musculus GN=Itgam PE=1 SV=2                                                       | 2.515178 | 3  | 7  | 3  | 127.4   | 7.27 | 3200000  | 2600000  | 2900000  | 16.3056  |
| P24063 | Integrin alpha-L OS=Mus musculus GN=Itgal PE=1 SV=2                                                       | 9.88822  | 9  | 22 | 9  | 128.247 | 6.11 | 3700000  | 3000000  | 3400000  | 64.85117 |
| Q99MI1 | ELKS/Rab6-interacting/CAST family member 1 OS=Mus musculus GN=Erc1 PE=1 SV=1                              | 4.464286 | 4  | 9  | 4  | 128.252 | 5.87 | 1200000  | 880000   | 690000   | 24.27982 |
| Q640N1 | Adipocyte enhancer-binding protein 1 OS=Mus musculus GN=Aebp1 PE=1 SV=1                                   | 11.79078 | 9  | 19 | 9  | 128.284 | 5.08 | 3800000  | 3400000  | 3200000  | 58.43533 |
| Q6A4J8 | Ubiquitin carboxyl-terminal hydrolase 7 OS=Mus musculus GN=Usp7 PE=1 SV=1                                 | 7.887579 | 8  | 16 | 8  | 128.393 | 5.5  | 2900000  | 2700000  | 3200000  | 41.22472 |
| Q9DBV3 | Probable ATP-dependent RNA helicase DHX34 OS=Mus musculus GN=Dhx34 PE=1 SV=2                              | 2.358079 | 1  | 1  | 1  | 128.427 | 8.16 |          |          |          | 2.658601 |
| P46735 | Unconventional myosin-I b OS=Mus musculus GN=Myo1b PE=1 SV=3                                              | 2.168022 | 2  | 3  | 2  | 128.483 | 9.26 |          | 1600000  | 1600000  | 6.840855 |
| Q8R0G9 | Nuclear pore complex protein Nup133 OS=Mus musculus GN=Nup133 PE=1 SV=2                                   | 8.311688 | 7  | 15 | 7  | 128.539 | 5.2  | 2000000  | 1700000  | 1500000  | 42.75343 |
| Q810B6 | Rabankyrin-5 OS=Mus musculus GN=Ankfy1 PE=1 SV=2                                                          | 1.283148 | 1  | 3  | 1  | 128.571 | 5.91 | 1100000  | 1200000  | 1200000  | 10.54433 |
| P28660 | Nck-associated protein 1 OS=Mus musculus GN=Nckap1 PE=1 SV=2                                              | 6.826241 | 7  | 12 | 7  | 128.7   | 6.62 | 4200000  | 3300000  | 2900000  | 36.987   |
| Q9EPR5 | VPS10 domain-containing receptor SorCS2 OS=Mus musculus GN=Sorcs2 PE=1 SV=2                               | 0.69025  | 1  | 1  | 1  | 128.822 | 7.34 | 440000   |          |          | 2.325137 |
| P98195 | Probable phospholipid-transporting ATPase IIB OS=Mus musculus GN=Atp9b PE=1 SV=4                          | 2.792321 | 2  | 3  | 2  | 128.934 | 7.64 |          |          | 550000   | 8.780249 |
| Q9QXH4 | Integrin alpha-X OS=Mus musculus GN=Itgax PE=1 SV=1                                                       | 4.277716 | 4  | 8  | 4  | 129.069 | 6.64 | 2500000  | 2700000  | 1900000  | 23.47733 |
| Q8R5K4 | Nucleolar protein 6 OS=Mus musculus GN=Nol6 PE=2 SV=2                                                     | 3.559028 | 3  | 6  | 3  | 129.146 | 6.79 | 1500000  | 1100000  | 1400000  | 12.4478  |
| Q01149 | Collagen alpha-2(I) chain OS=Mus musculus GN=Col1a2 PE=1 SV=2                                             | 10.86006 | 11 | 39 | 11 | 129.478 | 9.19 | 94000000 | 1.6E+08  | 91000000 | 111.0358 |
| P35441 | Thrombospondin-1 OS=Mus musculus GN=Thbs1 PE=1 SV=1                                                       | 7.264957 | 6  | 9  | 6  | 129.564 | 4.96 | 990000   | 1500000  | 970000   | 26.26412 |
| Q05920 | Pyruvate carboxylase, mitochondrial OS=Mus musculus GN=Pc PE=1 SV=1                                       | 1.697793 | 2  | 4  | 2  | 129.602 | 6.71 | 2100000  | 2300000  | 2500000  | 9.633676 |

|        |                                                                                                  |          |    |    |    |         |      |          |         |          |          |
|--------|--------------------------------------------------------------------------------------------------|----------|----|----|----|---------|------|----------|---------|----------|----------|
| Q6P6L0 | Filamin A-interacting protein 1-like OS=Mus musculus GN=Filip1 PE=1 SV=2                         | 1.768347 | 2  | 2  | 2  | 129.692 | 6.37 | 690000   |         | 630000   | 5.196905 |
| Q03350 | Thrombospondin-2 OS=Mus musculus GN=Thbs2 PE=1 SV=2                                              | 1.706485 | 1  | 2  | 1  | 129.798 | 4.82 | 300000   | 490000  |          | 4.746555 |
| Q80VP0 | Tectonin beta-propeller repeat-containing protein 1 OS=Mus musculus GN=Tecpr1 PE=1 SV=1          | 3.430532 | 2  | 4  | 2  | 130.184 | 6.48 | 810000   | 460000  |          | 13.02361 |
| Q9D2D7 | Zinc finger protein 687 OS=Mus musculus GN=Znf687 PE=1 SV=1                                      | 1.212611 | 1  | 2  | 1  | 130.268 | 8.12 | 220000   | 440000  |          | 5.215075 |
| Q99MU3 | Double-stranded RNA-specific adenosine deaminase OS=Mus musculus GN=Adar PE=1 SV=2               | 3.480475 | 2  | 4  | 2  | 130.365 | 8.7  | 1500000  | 1300000 | 1600000  | 11.4729  |
| Q3V3R4 | Integrin alpha-1 OS=Mus musculus GN=Itga1 PE=1 SV=2                                              | 2.8838   | 3  | 5  | 3  | 130.727 | 6.2  | 2800000  | 2000000 | 1000000  | 12.99503 |
| Q6DFV1 | Condensin-2 complex subunit G2 OS=Mus musculus GN=Ncapg2 PE=1 SV=2                               | 1.230228 | 1  | 1  | 1  | 130.809 | 6.93 |          | 210000  |          | 2.357386 |
| P55012 | Solute carrier family 12 member 2 OS=Mus musculus GN=Slc12a2 PE=1 SV=2                           | 4.39834  | 4  | 8  | 4  | 130.95  | 7.33 | 1400000  | 990000  | 1100000  | 21.42509 |
| Q9Z0U1 | Tight junction protein ZO-2 OS=Mus musculus GN=Tjp2 PE=1 SV=2                                    | 11.13967 | 10 | 17 | 10 | 131.2   | 6.79 | 1800000  | 1700000 | 1000000  | 48.2029  |
| P70704 | Phospholipid-transporting ATPase IA OS=Mus musculus GN=Atp8a1 PE=1 SV=2                          | 3.092784 | 3  | 7  | 3  | 131.33  | 6.84 | 4400000  | 2700000 | 2500000  | 21.1564  |
| P27046 | Alpha-mannosidase 2 OS=Mus musculus GN=Man2a1 PE=1 SV=2                                          | 1.130435 | 1  | 3  | 1  | 131.548 | 8.03 | 800000   | 790000  | 1000000  | 9.241861 |
| P37889 | Fibulin-2 OS=Mus musculus GN=Fbln2 PE=1 SV=2                                                     | 3.603604 | 3  | 4  | 3  | 131.746 | 4.68 | 810000   | 590000  | 460000   | 11.27339 |
| Q8BX90 | Fibronectin type-III domain-containing protein 3A OS=Mus musculus GN=Fndc3a PE=1 SV=3            | 2.003339 | 2  | 2  | 2  | 131.874 | 6.64 |          |         | 1400000  | 4.482981 |
| Q8CH18 | Cell division cycle and apoptosis regulator protein 1 OS=Mus musculus GN=Ccar1 PE=1 SV=1         | 13.08901 | 9  | 18 | 9  | 131.979 | 5.76 | 4400000  | 4900000 | 4600000  | 51.01702 |
| Q9EPE9 | Manganese-transporting ATPase 13A1 OS=Mus musculus GN=Atp13a1 PE=1 SV=2                          | 10.58333 | 11 | 26 | 11 | 132.303 | 8.03 | 4800000  | 5500000 | 5500000  | 67.20984 |
| Q9R0K7 | Plasma membrane calcium-transporting ATPase 2 OS=Mus musculus GN=Atp2b2 PE=1 SV=2                | 18.36394 | 16 | 38 | 11 | 132.503 | 5.96 | 8900000  | 4400000 | 3200000  | 126.0956 |
| Q6PDG5 | SWI/SNF complex subunit SMARCC2 OS=Mus musculus GN=Smarcc2 PE=1 SV=2                             | 15.41632 | 16 | 36 | 13 | 132.522 | 5.59 | 3600000  | 4600000 | 3400000  | 101.6093 |
| P59997 | Lysine-specific demethylase 2A OS=Mus musculus GN=Kdm2a PE=1 SV=2                                | 2.239449 | 2  | 3  | 2  | 132.594 | 7.44 | 300000   | 420000  |          | 7.073794 |
| Q6NWW9 | Fibronectin type III domain-containing protein 3B OS=Mus musculus GN=Fndc3b PE=1 SV=1            | 2.402651 | 2  | 3  | 2  | 132.679 | 6.29 | 1500000  | 1500000 | 730000   | 7.257413 |
| Q8BHG1 | Nardilysin OS=Mus musculus GN=Nrdc PE=1 SV=1                                                     | 1.464255 | 1  | 2  | 1  | 132.808 | 4.87 |          | 660000  | 660000   | 6.046897 |
| Q6P9Q6 | FK506-binding protein 15 OS=Mus musculus GN=Fkbp15 PE=1 SV=2                                     | 9.621711 | 8  | 13 | 8  | 132.878 | 5.07 | 2100000  | 1200000 | 970000   | 40.75704 |
| Q6Q477 | Plasma membrane calcium-transporting ATPase 4 OS=Mus musculus GN=Atp2b4 PE=1 SV=1                | 15.93361 | 13 | 35 | 6  | 132.984 | 6.13 | 5800000  | 2700000 | 1800000  | 122.6448 |
| Q8BYA0 | Tubulin-specific chaperone D OS=Mus musculus GN=Tbcd PE=1 SV=1                                   | 1.923077 | 2  | 4  | 2  | 133.236 | 6.51 | 880000   | 1100000 | 1000000  | 12.94579 |
| P52332 | Tyrosine-protein kinase JAK1 OS=Mus musculus GN=Jak1 PE=1 SV=1                                   | 1.040763 | 1  | 1  | 1  | 133.282 | 7.59 |          |         | 1700000  | 2.855462 |
| Q62018 | RNA polymerase-associated protein CTR9 homolog OS=Mus musculus GN=Ctr9 PE=1 SV=2                 | 3.239557 | 3  | 6  | 3  | 133.326 | 6.49 | 1700000  | 2000000 | 1600000  | 16.63023 |
| Q6GQT9 | Nodal modulator 1 OS=Mus musculus GN=Nomo1 PE=1 SV=1                                             | 8.896211 | 8  | 17 | 8  | 133.336 | 6.09 | 6100000  | 5100000 | 6000000  | 53.03015 |
| P60469 | Liprin-alpha-3 OS=Mus musculus GN=Ppfia3 PE=1 SV=2                                               | 1.005025 | 1  | 1  | 1  | 133.344 | 5.64 | 470000   |         |          | 2.897202 |
| Q80UK8 | Integrator complex subunit 2 OS=Mus musculus GN=Ints2 PE=1 SV=2                                  | 2.253756 | 1  | 1  | 1  | 133.429 | 6.11 |          |         | 470000   | 3.579299 |
| Q9E552 | Phosphatidylinositol 3,4,5-trisphosphate 5-phosphatase 1 OS=Mus musculus GN=Inpp5d PE=1 SV=2     | 6.968934 | 7  | 13 | 7  | 133.458 | 7.8  | 2000000  | 1900000 | 1700000  | 42.17499 |
| Q3UPL0 | Protein transport protein Sec31A OS=Mus musculus GN=Sec31a PE=1 SV=2                             | 5.121951 | 4  | 9  | 4  | 133.486 | 6.76 | 2000000  | 2400000 | 2600000  | 26.90719 |
| Q61543 | Golgi apparatus protein 1 OS=Mus musculus GN=Glg1 PE=1 SV=1                                      |          | 16 | 15 | 33 | 133.646 | 6.84 | 5000000  | 4000000 | 3100000  | 92.49106 |
| Q5U4C3 | Splicing factor, arginine/serine-rich 19 OS=Mus musculus GN=Scaf1 PE=1 SV=1                      | 2.229299 | 2  | 4  | 2  | 133.761 | 9.45 | 460000   | 2200000 | 3800000  | 9.405379 |
| Q8CFI7 | DNA-directed RNA polymerase II subunit RPB2 OS=Mus musculus GN=Polr2b PE=1 SV=2                  | 7.666099 | 6  | 15 | 6  | 133.825 | 6.87 | 2500000  | 3600000 | 3500000  | 50.10248 |
| Q8BMM0 | F-box only protein 38 OS=Mus musculus GN=Fbxo38 PE=1 SV=1                                        | 1.59129  | 1  | 3  | 1  | 133.842 | 6.09 | 1100000  | 1000000 | 950000   | 12.0921  |
| Q8BND3 | WD repeat-containing protein 35 OS=Mus musculus GN=Wdr35 PE=1 SV=3                               | 1.27011  | 1  | 1  | 1  | 133.905 | 6.34 | 210000   |         |          | 2.215543 |
| Q65Z40 | Wings apart-like protein homolog OS=Mus musculus GN=Wapl PE=1 SV=2                               | 5.5      | 4  | 6  | 4  | 133.986 | 5.41 | 1100000  | 1000000 | 1000000  | 13.71204 |
| Q8C2E7 | WASH complex subunit strumpellin OS=Mus musculus GN=Kiaa0196 PE=1 SV=2                           | 2.157032 | 2  | 2  | 2  | 134.025 | 7.12 |          | 680000  |          | 5.534799 |
| Q8BMJ2 | Leucine--tRNA ligase, cytoplasmic OS=Mus musculus GN=Lars PE=1 SV=2                              | 6.791171 | 7  | 17 | 7  | 134.106 | 7.05 | 4700000  | 4000000 | 3900000  | 52.00894 |
| Q8CG48 | Structural maintenance of chromosomes protein 2 OS=Mus musculus GN=Smc2 PE=1 SV=2                | 10.83123 | 11 | 23 | 11 | 134.156 | 8.41 | 3800000  | 4100000 | 3800000  | 64.43835 |
| Q8C419 | Probable G-protein coupled receptor 158 OS=Mus musculus GN=Gpr158 PE=1 SV=2                      | 1.333333 | 1  | 1  | 1  | 134.341 | 8.09 |          |         |          | 2.467273 |
| Q8CDG3 | Deubiquitinating protein VCIP135 OS=Mus musculus GN=Vcpi1 PE=1 SV=1                              | 2.377049 | 2  | 4  | 2  | 134.418 | 7.17 | 1400000  | 1000000 | 1700000  | 10.90785 |
| G5E829 | Plasma membrane calcium-transporting ATPase 1 OS=Mus musculus GN=Atp2b1 PE=1 SV=1                | 20.08197 | 19 | 54 | 12 | 134.662 | 5.91 | 15000000 | 8100000 | 7800000  | 185.0052 |
| Q6NWW3 | Intraflagellar transport protein 122 homolog OS=Mus musculus GN=ift122 PE=1 SV=1                 | 1.43824  | 1  | 1  | 1  | 134.712 | 6.98 |          |         |          | 2.490688 |
| Q9QW16 | SRC kinase signaling inhibitor 1 OS=Mus musculus GN=Srcin1 PE=1 SV=2                             | 4.56     | 4  | 7  | 4  | 134.776 | 9.32 | 1800000  | 780000  | 1000000  | 17.52816 |
| O35954 | Membrane-associated phosphatidylinositol transfer protein 1 OS=Mus musculus GN=Pitpnm1 PE=1 SV=1 | 2.735318 | 1  | 1  | 1  | 134.855 | 6.06 | 570000   |         |          | 4.088769 |
| O35927 | Catenin delta-2 OS=Mus musculus GN=Ctnnd2 PE=1 SV=1                                              | 2.405774 | 2  | 2  | 2  | 134.916 | 7.65 | 600000   |         |          | 4.879312 |
| O08784 | Treacle protein OS=Mus musculus GN=Tcof1 PE=1 SV=1                                               | 7.878788 | 8  | 16 | 8  | 134.921 | 9.35 | 5600000  | 6100000 | 5900000  | 47.13845 |
| P70232 | Neural cell adhesion molecule L1-like protein OS=Mus musculus GN=Chl1 PE=1 SV=2                  | 11.91067 | 8  | 16 | 8  | 134.99  | 5.57 | 3700000  | 2700000 | 2300000  | 44.81159 |
| O54774 | AP-3 complex subunit delta-1 OS=Mus musculus GN=Ap3d1 PE=1 SV=1                                  | 7.923269 | 8  | 23 | 8  | 134.996 | 7.37 | 6200000  | 5700000 | 7000000  | 69.64563 |
| Q921M3 | Splicing factor 3B subunit 3 OS=Mus musculus GN=Sf3b3 PE=1 SV=1                                  | 13.72227 | 14 | 36 | 14 | 135.465 | 5.26 | 8300000  | 7500000 | 12000000 | 99.35413 |
| Q8K1X1 | WD repeat-containing protein 11 OS=Mus musculus GN=Wdr11 PE=1 SV=1                               | 2.861815 | 3  | 4  | 3  | 135.851 | 7.11 | 980000   | 1000000 | 1000000  | 8.628666 |
| Q6ZQ38 | Cullin-associated NEDD8-dissociated protein 1 OS=Mus musculus GN=Cand1 PE=1 SV=2                 | 10.0813  | 11 | 23 | 11 | 136.245 | 5.78 | 9600000  | 8600000 | 6900000  | 67.39534 |
| Q3UMB9 | WASH complex subunit 7 OS=Mus musculus GN=Kiaa1033 PE=1 SV=2                                     | 5.11509  | 5  | 8  | 5  | 136.283 | 7.37 | 1000000  | 1500000 | 1800000  | 22.80892 |



|        |                                                                                                     |   |          |    |    |    |         |      |          |          |          |          |
|--------|-----------------------------------------------------------------------------------------------------|---|----------|----|----|----|---------|------|----------|----------|----------|----------|
| Q70305 | Ataxin-2 OS=Mus musculus GN=Atxn2 PE=1 SV=1                                                         |   | 2.101167 | 2  | 2  | 2  | 136.4   | 9.55 |          | 700000   |          | 5.493347 |
| P10493 | Nidogen-1 OS=Mus musculus GN=Nid1 PE=1 SV=2                                                         |   | 6.746988 | 7  | 20 | 6  | 136.45  | 5.44 | 4800000  | 5500000  | 4400000  | 58.09206 |
| Q9R0G7 | Zinc finger E-box-binding homeobox 2 OS=Mus musculus GN=Zeb2 PE=1 SV=2                              |   | 3.374486 | 3  | 6  | 3  | 136.529 | 6.34 | 1900000  | 580000   | 480000   | 14.27188 |
| Q99PU8 | Putative ATP-dependent RNA helicase DHX30 OS=Mus musculus GN=Dhx30 PE=1 SV=1                        |   | 0.657354 | 1  | 1  | 1  | 136.583 | 8.75 |          |          | 220000   | 1.958907 |
| Q64455 | Receptor-type tyrosine-protein phosphatase eta OS=Mus musculus GN=Ptptrj PE=1 SV=2                  |   | 1.373183 | 1  | 2  | 1  | 136.683 | 5.57 | 480000   | 450000   |          | 6.701038 |
| Q922B9 | Sperm-specific antigen 2 homolog OS=Mus musculus GN=Ssfa2 PE=1 SV=3                                 |   | 1.996805 | 2  | 3  | 2  | 136.862 | 5.26 | 67000000 | 420000   | 650000   | 7.746915 |
| P55066 | Neurocan core protein OS=Mus musculus GN=Ncan PE=1 SV=1                                             |   | 5.283912 | 5  | 12 | 5  | 137.114 | 5.72 | 3400000  | 2300000  | 1000000  | 24.33828 |
| Q3UMF0 | Cordon-bleu protein-like 1 OS=Mus musculus GN=Cobl1 PE=1 SV=2                                       |   | 0.942655 | 1  | 1  | 1  | 137.296 | 8.16 |          | 770000   |          | 2.621943 |
| Q9R1X4 | Protein timeless homolog OS=Mus musculus GN=Timeless PE=1 SV=3                                      |   | 0.835422 | 1  | 1  | 1  | 137.417 | 5.49 |          | 180000   |          | 2.461619 |
| Q05D44 | Eukaryotic translation initiation factor 5B OS=Mus musculus GN=Eif5b PE=1 SV=2                      |   | 18.17434 | 18 | 38 | 18 | 137.532 | 5.59 | 4900000  | 4800000  | 4800000  | 118.3473 |
| Q810U3 | Neurofascin OS=Mus musculus GN=Nfasc PE=1 SV=1                                                      |   | 11.37097 | 10 | 23 | 10 | 137.889 | 6.19 | 10000000 | 5500000  | 5100000  | 61.51613 |
| P11087 | Collagen alpha-1(I) chain OS=Mus musculus GN=Col1a1 PE=1 SV=4                                       |   | 9.015829 | 9  | 50 | 9  | 137.948 | 5.85 | 1.8E+08  | 2.4E+08  | 2.1E+08  | 177.5384 |
| Q9Z1B3 | 1-phosphatidylinositol 4,5-bisphosphate phosphodiesterase beta-1 OS=Mus musculus GN=Plcb1 PE=1 SV=2 |   | 12.58224 | 12 | 25 | 12 | 138.309 | 6.13 | 4000000  | 2500000  | 2500000  | 74.72405 |
| Q8CIE6 | Coatmer subunit alpha OS=Mus musculus GN=Copa PE=1 SV=2                                             |   | 16.66667 | 17 | 44 | 17 | 138.344 | 7.65 | 19000000 | 17000000 | 16000000 | 127.1603 |
| P04258 | SWISS-PROT:P04258 (Bos taurus) Similar to Collagen alpha 1(III) chain                               | x | 3.61528  | 4  | 33 | 3  | 138.354 | 6.43 | 1.9E+08  | 2.2E+08  | 1.8E+08  | 123.1763 |
| Q810U4 | Neuronal cell adhesion molecule OS=Mus musculus GN=Nrcam PE=1 SV=2                                  |   | 5.015924 | 5  | 8  | 5  | 138.435 | 5.91 | 2300000  | 1400000  | 1200000  | 21.64701 |
| Q0GNC1 | Inverted formin-2 OS=Mus musculus GN=Inf2 PE=1 SV=1                                                 |   | 4.79183  | 4  | 8  | 4  | 138.474 | 5.21 | 1700000  | 1300000  | 1500000  | 26.51213 |
| Q7TT18 | Activating transcription factor 7-interacting protein 1 OS=Mus musculus GN=Atf7ip PE=1 SV=1         |   | 4.211332 | 4  | 7  | 4  | 138.508 | 4.77 | 1200000  | 1600000  | 910000   | 17.9568  |
| P08121 | Collagen alpha-1(III) chain OS=Mus musculus GN=Col3a1 PE=1 SV=4                                     |   | 6.898907 | 7  | 17 | 6  | 138.858 | 6.52 | 18000000 | 24000000 | 15000000 | 57.72959 |
| Q69ZW3 | EH domain-binding protein 1 OS=Mus musculus GN=Ehbp1 PE=1 SV=3                                      |   | 1.299756 | 1  | 1  | 1  | 139.019 | 5.38 |          | 440000   |          | 3.125922 |
| P06909 | Complement factor H OS=Mus musculus GN=Cfh PE=1 SV=2                                                |   | 1.539708 | 1  | 2  | 1  | 139.047 | 6.99 |          | 550000   |          | 4.53601  |
| O08808 | Protein diaphanous homolog 1 OS=Mus musculus GN=Diaph1 PE=1 SV=1                                    |   | 1.752988 | 2  | 5  | 2  | 139.255 | 5.57 | 1200000  | 1200000  | 900000   | 13.8248  |
| P51432 | 1-phosphatidylinositol 4,5-bisphosphate phosphodiesterase beta-3 OS=Mus musculus GN=Plcb3 PE=1 SV=2 |   | 1.458671 | 1  | 2  | 1  | 139.4   | 5.94 | 180000   | 410000   |          | 6.268155 |
| Q5SV85 | Synergin gamma OS=Mus musculus GN=Synrg PE=1 SV=1                                                   |   | 3.522205 | 3  | 8  | 3  | 139.528 | 5.03 | 760000   | 680000   | 730000   | 23.31451 |
| Q64514 | Tripeptidyl-peptidase 2 OS=Mus musculus GN=Tpp2 PE=1 SV=3                                           |   | 12.67829 | 12 | 29 | 12 | 139.791 | 6.58 | 3600000  | 3100000  | 2300000  | 87.70089 |
| Q9Z1Q9 | Valine--tRNA ligase OS=Mus musculus GN=Vars PE=1 SV=1                                               |   | 20.34838 | 23 | 63 | 23 | 140.127 | 7.77 | 22000000 | 22000000 | 21000000 | 188.3117 |
| O35206 | Collagen alpha-1(XV) chain OS=Mus musculus GN=Col15a1 PE=1 SV=2                                     |   | 1.02414  | 1  | 1  | 1  | 140.385 | 4.89 | 160000   |          |          | 2.753558 |
| P97820 | Mitogen-activated protein kinase kinase kinase 4 OS=Mus musculus GN=Map4k4 PE=1 SV=1                |   | 3.163017 | 3  | 10 | 1  | 140.515 | 7.47 | 660000   | 230000   |          | 30.14993 |
| Q8BRT1 | CLIP-associating protein 2 OS=Mus musculus GN=Clasp2 PE=1 SV=1                                      |   | 4.587869 | 4  | 5  | 4  | 140.652 | 8.63 | 2500000  | 1600000  | 4100000  | 17.40478 |
| Q6ZPZ3 | Zinc finger CCCH domain-containing protein 4 OS=Mus musculus GN=Zc3h4 PE=1 SV=2                     |   | 5.521472 | 4  | 15 | 4  | 140.88  | 6.27 | 2000000  | 2100000  | 1900000  | 51.59539 |
| P11627 | Neural cell adhesion molecule L1 OS=Mus musculus GN=L1cam PE=1 SV=1                                 |   | 0.952381 | 1  | 1  | 1  | 140.881 | 5.97 |          |          |          | 2.61327  |
| O88879 | Apoptotic protease-activating factor 1 OS=Mus musculus GN=Apaf1 PE=1 SV=3                           |   | 1.441153 | 2  | 2  | 2  | 140.913 | 6.43 |          | 890000   |          | 4.405502 |
| Q925H1 | Zinc finger transcription factor Trps1 OS=Mus musculus GN=Trps1 PE=1 SV=1                           |   | 1.483216 | 1  | 3  | 1  | 140.946 | 7.59 | 290000   | 270000   | 280000   | 9.40628  |
| O35638 | Cohesin subunit SA-2 OS=Mus musculus GN=Stag2 PE=1 SV=3                                             |   | 2.680747 | 3  | 3  | 3  | 141.19  | 5.43 | 1300000  |          |          | 3.925761 |
| O54824 | Pro-interleukin-16 OS=Mus musculus GN=Il16 PE=1 SV=3                                                |   | 1.134644 | 1  | 1  | 1  | 141.347 | 7.78 |          | 440000   |          | 3.046257 |
| O54988 | STE20-like serine/threonine-protein kinase OS=Mus musculus GN=Slk PE=1 SV=2                         |   | 6.163828 | 5  | 11 | 4  | 141.37  | 5.14 | 1900000  | 1800000  | 1400000  | 34.39672 |
| Q9CW03 | Structural maintenance of chromosomes protein 3 OS=Mus musculus GN=Smc3 PE=1 SV=2                   |   | 20.46015 | 21 | 50 | 21 | 141.468 | 7.18 | 4400000  | 4700000  | 4800000  | 156.8755 |
| O08788 | Dynactin subunit 1 OS=Mus musculus GN=Dctn1 PE=1 SV=3                                               |   | 16.15925 | 17 | 42 | 17 | 141.588 | 5.9  | 6900000  | 5100000  | 5100000  | 118.9258 |
| Q8VDJ3 | Vigilin OS=Mus musculus GN=Hdlbp PE=1 SV=1                                                          |   | 15.9306  | 16 | 32 | 16 | 141.655 | 6.87 | 9300000  | 8300000  | 8800000  | 98.32987 |
| Q5SVR0 | TBC1 domain family member 9B OS=Mus musculus GN=Tbc1d9b PE=1 SV=1                                   |   | 2.29612  | 2  | 3  | 2  | 141.69  | 5.29 |          | 750000   |          | 8.746991 |
| P28481 | Collagen alpha-1(II) chain OS=Mus musculus GN=Col2a1 PE=1 SV=2                                      |   | 5.245461 | 7  | 35 | 6  | 141.886 | 6.92 | 95000000 | 81000000 | 50000000 | 132.526  |
| Q80X82 | Sympleskin OS=Mus musculus GN=Sympk PE=1 SV=1                                                       |   | 2.725857 | 3  | 4  | 3  | 142.194 | 6.05 |          | 1300000  | 1100000  | 10.2934  |
| O35604 | Niemann-Pick C1 protein OS=Mus musculus GN=Npc1 PE=1 SV=2                                           |   | 0.783085 | 1  | 2  | 1  | 142.791 | 5.71 | 930000   |          | 1000000  | 4.080373 |
| Q3UYK3 | TBC1 domain family member 9 OS=Mus musculus GN=Tbc1d9 PE=2 SV=2                                     |   | 0.870253 | 1  | 1  | 1  | 142.933 | 5.34 |          |          |          | 0        |
| Q62417 | Sorbin and SH3 domain-containing protein 1 OS=Mus musculus GN=Sorbs1 PE=1 SV=2                      |   | 3.643411 | 4  | 10 | 4  | 142.982 | 8.25 | 1900000  | 820000   | 1100000  | 27.52734 |
| Q6P5B0 | RRP12-like protein OS=Mus musculus GN=Rrp12 PE=1 SV=1                                               |   | 5.791506 | 5  | 9  | 5  | 143.041 | 8.91 | 2300000  | 1000000  | 2600000  | 25.97486 |
| Q9CU62 | Structural maintenance of chromosomes protein 1A OS=Mus musculus GN=Smc1a PE=1 SV=4                 |   | 16.3017  | 17 | 34 | 17 | 143.146 | 7.64 | 4100000  | 5400000  | 4300000  | 94.85619 |
| Q8BSS9 | Liprin-alpha-2 OS=Mus musculus GN=Ppfia2 PE=1 SV=2                                                  |   | 1.670644 | 1  | 1  | 1  | 143.146 | 6.11 |          |          |          | 2.6743   |
| Q99KY4 | Cyclin-G-associated kinase OS=Mus musculus GN=Gak PE=1 SV=2                                         |   | 0.91954  | 1  | 1  | 1  | 143.55  | 5.73 |          |          | 1500000  | 1.848079 |
| Q8BU30 | Isoleucine--tRNA ligase, cytoplasmic OS=Mus musculus GN=lars PE=1 SV=2                              |   | 5.071315 | 5  | 10 | 5  | 144.179 | 6.55 | 2800000  | 2300000  | 3000000  | 30.37848 |
| P06800 | Receptor-type tyrosine-protein phosphatase C OS=Mus musculus GN=Ptpcr PE=1 SV=3                     |   | 16.96359 | 19 | 55 | 19 | 144.514 | 5.94 | 10000000 | 14000000 | 12000000 | 181.1228 |
| Q9JJ28 | Protein flightless-1 homolog OS=Mus musculus GN=Flh1 PE=1 SV=1                                      |   | 4.720692 | 5  | 9  | 5  | 144.712 | 6.06 | 2500000  | 2700000  | 1600000  | 25.79505 |
| Q61137 | Astroactin-1 OS=Mus musculus GN=Astn1 PE=1 SV=4                                                     |   | 1.382488 | 1  | 1  | 1  | 144.791 | 5.21 | 520000   |          |          | 1.994277 |

|        |                                                                                                      |          |    |    |    |         |      |          |          |          |          |
|--------|------------------------------------------------------------------------------------------------------|----------|----|----|----|---------|------|----------|----------|----------|----------|
| Q3U962 | Collagen alpha-2(V) chain OS=Mus musculus GN=Col5a2 PE=1 SV=1                                        | 3.072812 | 2  | 6  | 1  | 144.929 | 6.7  | 2800000  | 3400000  | 1600000  | 20.51311 |
| Q60520 | Paired amphipathic helix protein Sin3a OS=Mus musculus GN=Sin3a PE=1 SV=3                            | 4.945055 | 5  | 6  | 5  | 144.998 | 7.25 | 1800000  | 1000000  | 1100000  | 16.92209 |
| Q7TMB8 | Cytoplasmic FMR1-interacting protein 1 OS=Mus musculus GN=Cyfp1 PE=1 SV=1                            | 11.49242 | 13 | 33 | 7  | 145.148 | 6.9  | 5900000  | 6400000  | 5700000  | 82.27118 |
| Q8K4P0 | pre-mRNA 3' end processing protein WDR33 OS=Mus musculus GN=Wdr33 PE=1 SV=1                          | 2.556391 | 3  | 5  | 3  | 145.176 | 9.13 | 780000   | 1100000  | 1600000  | 12.34229 |
| Q6PGL7 | WASH complex subunit FAM21 OS=Mus musculus GN=Fam21 PE=1 SV=1                                        | 9.595202 | 8  | 15 | 8  | 145.224 | 4.77 | 2000000  | 1900000  | 1300000  | 38.89133 |
| Q5SQX6 | Cytoplasmic FMR1-interacting protein 2 OS=Mus musculus GN=Cyfp2 PE=1 SV=2                            | 10.45491 | 12 | 22 | 6  | 145.565 | 7.05 | 3000000  | 2300000  | 1400000  | 58.94764 |
| Q99NB9 | Splicing factor 3B subunit 1 OS=Mus musculus GN=Sf3b1 PE=1 SV=1                                      | 21.39571 | 20 | 48 | 20 | 145.724 | 7.09 | 9100000  | 9200000  | 9300000  | 152.6658 |
| Q58A65 | C-Jun-amino-terminal kinase-interacting protein 4 OS=Mus musculus GN=Spag9 PE=1 SV=2                 | 4.163512 | 4  | 9  | 4  | 146.129 | 5.15 | 1800000  | 1800000  | 1200000  | 24.19418 |
| Q64331 | Unconventional myosin-VI OS=Mus musculus GN=Myo6 PE=1 SV=1                                           | 6.166008 | 5  | 6  | 5  | 146.317 | 8.85 | 1000000  | 1700000  | 710000   | 19.31795 |
| Q00519 | Xanthine dehydrogenase/oxidase OS=Mus musculus GN=Xdh PE=1 SV=5                                      | 2.022472 | 2  | 4  | 2  | 146.468 | 7.56 | 1700000  | 2300000  |          | 13.75304 |
| Q9QY30 | Bile salt export pump OS=Mus musculus GN=Abcb11 PE=1 SV=2                                            | 1.286904 | 1  | 1  | 1  | 146.655 | 7.66 |          | 480000   |          | 2.938556 |
| Q8CG47 | Structural maintenance of chromosomes protein 4 OS=Mus musculus GN=Smc4 PE=1 SV=1                    | 5.909798 | 6  | 11 | 6  | 146.803 | 7.3  | 1300000  | 2800000  | 1200000  | 31.07413 |
| Q9JM52 | Missshapen-like kinase 1 OS=Mus musculus GN=Mink1 PE=1 SV=3                                          | 2.752294 | 3  | 7  | 1  | 147.203 | 7.44 |          |          | 2100000  | 18.29843 |
| Q8CIH5 | 1-phosphatidylinositol 4,5-bisphosphate phosphodiesterase gamma-2 OS=Mus musculus GN=Plcg2 PE=1 SV=1 | 2.687747 | 2  | 3  | 2  | 147.498 | 6.77 | 1500000  |          | 1100000  | 7.85052  |
| Q61526 | Receptor tyrosine-protein kinase erbB-3 OS=Mus musculus GN=Erbb3 PE=1 SV=2                           | 0.746826 | 1  | 3  | 1  | 147.517 | 6.55 | 1300000  | 1300000  | 1100000  | 7.470978 |
| Q6PCM1 | Lysine-specific demethylase 3A OS=Mus musculus GN=Kdm3a PE=1 SV=1                                    | 1.284958 | 1  | 1  | 1  | 147.754 | 7.74 |          |          |          | 2.777489 |
| Q5SW19 | Clustered mitochondria protein homolog OS=Mus musculus GN=Cluh PE=1 SV=2                             | 2.965779 | 2  | 3  | 2  | 147.975 | 6.02 | 940000   | 600000   |          | 10.46708 |
| F65EU4 | Ras/Rap GTPase-activating protein SynGAP OS=Mus musculus GN=Syngap1 PE=1 SV=2                        | 2.089552 | 2  | 3  | 2  | 148.145 | 8.98 | 1700000  |          | 700000   | 7.912853 |
| Q6Y7W8 | PERQ amino acid-rich with GYF domain-containing protein 2 OS=Mus musculus GN=Gigyf2 PE=1 SV=2        | 3.408211 | 3  | 3  | 3  | 149.102 | 5.57 | 980000   | 420000   |          | 7.451162 |
| Q8K4Q0 | Regulatory-associated protein of mTOR OS=Mus musculus GN=Rptor PE=1 SV=1                             | 1.198502 | 1  | 1  | 1  | 149.375 | 6.87 | 870000   |          |          | 2.912625 |
| O70133 | ATP-dependent RNA helicase A OS=Mus musculus GN=Dhx9 PE=1 SV=2                                       | 17.68116 | 19 | 60 | 19 | 149.381 | 6.83 | 21000000 | 23000000 | 23000000 | 201.6523 |
| Q7TT37 | Elongator complex protein 1 OS=Mus musculus GN=Ikbkap PE=1 SV=2                                      | 5.326332 | 6  | 11 | 6  | 149.489 | 6    | 2200000  | 2200000  | 2200000  | 32.07987 |
| Q8BYI9 | Tenascin-R OS=Mus musculus GN=Tnr PE=1 SV=2                                                          | 7.142857 | 8  | 12 | 8  | 149.495 | 4.94 | 4800000  | 3300000  | 2800000  | 34.4969  |
| Q6PDH0 | Pleckstrin homology-like domain family B member 1 OS=Mus musculus GN=Phldb1 PE=1 SV=1                | 2.552881 | 3  | 6  | 3  | 149.978 | 8.87 | 2800000  | 3500000  | 3000000  | 18.3882  |
| Q6A026 | Sister chromatid cohesion protein PDS5 homolog A OS=Mus musculus GN=Pds5a PE=1 SV=3                  | 8.333333 | 10 | 20 | 9  | 150.232 | 7.85 | 3200000  | 3300000  | 3000000  | 66.14987 |
| P83510 | Traf2 and NCK-interacting protein kinase OS=Mus musculus GN=Tnik PE=1 SV=2                           | 2.87226  | 3  | 7  | 1  | 150.274 | 7.27 |          | 210000   |          | 18.08763 |
| Q6P9K8 | Caskin-1 OS=Mus musculus GN=Caskin1 PE=1 SV=2                                                        | 1.18798  | 1  | 1  | 1  | 150.403 | 9.17 | 480000   |          |          | 3.474536 |
| Q3UJD6 | Ubiquitin carboxyl-terminal hydrolase 19 OS=Mus musculus GN=Usp19 PE=1 SV=1                          | 3.970588 | 4  | 6  | 4  | 150.454 | 6.38 | 780000   | 640000   | 400000   | 16.63781 |
| Q9JIX8 | Apoptotic chromatin condensation inducer in the nucleus OS=Mus musculus GN=Acin1 PE=1 SV=3           | 16.44245 | 15 | 44 | 15 | 150.629 | 5.91 | 9600000  | 9500000  | 9000000  | 144.677  |
| P54276 | DNA mismatch repair protein Msh6 OS=Mus musculus GN=Msh6 PE=1 SV=3                                   | 5.228277 | 5  | 10 | 5  | 150.989 | 6.73 | 1500000  | 2500000  | 1500000  | 33.62239 |
| Q6EDY6 | F-actin-uncapping protein LRRC16A OS=Mus musculus GN=Lrrc16a PE=1 SV=2                               | 0.800582 | 1  | 1  | 1  | 151.765 | 7.8  | 1000000  |          |          | 2.288437 |
| Q77PV4 | Myb-binding protein 1A OS=Mus musculus GN=Mybbp1a PE=1 SV=2                                          | 19.41964 | 20 | 69 | 20 | 151.942 | 8.95 | 14000000 | 21000000 | 16000000 | 231.2749 |
| Q3UJB9 | Enhancer of mRNA-decapping protein 4 OS=Mus musculus GN=Edc4 PE=1 SV=2                               | 2.418208 | 3  | 3  | 3  | 152.389 | 5.78 |          |          | 1400000  | 7.244508 |
| Q8BMG7 | Rab3 GTPase-activating protein non-catalytic subunit OS=Mus musculus GN=Rab3gap2 PE=1 SV=2           | 2.781845 | 4  | 6  | 4  | 152.438 | 6.23 | 2000000  | 990000   | 1800000  | 10.89688 |
| Q61595 | Kinectin OS=Mus musculus GN=Ktn1 PE=1 SV=1                                                           | 14.92087 | 18 | 36 | 17 | 152.498 | 5.86 | 4500000  | 4700000  | 5000000  | 105.8367 |
| Q8VD65 | Phosphoinositide 3-kinase regulatory subunit 4 OS=Mus musculus GN=Plk3r4 PE=1 SV=3                   | 2.061856 | 2  | 4  | 2  | 152.502 | 7.12 | 370000   | 1100000  | 750000   | 11.7176  |
| Q9JLM4 | Zinc finger MYM-type protein 3 OS=Mus musculus GN=Zmym3 PE=1 SV=1                                    | 1.094891 | 1  | 1  | 1  | 152.78  | 6.39 |          |          | 1000000  | 3.193702 |
| Q80TJ1 | Calcium-dependent secretion activator 1 OS=Mus musculus GN=Cadps PE=1 SV=3                           | 4.280443 | 5  | 8  | 5  | 153.016 | 5.74 | 3500000  | 1700000  | 1300000  | 22.95076 |
| P70388 | DNA repair protein RAD50 OS=Mus musculus GN=Rad50 PE=1 SV=1                                          | 3.810976 | 5  | 11 | 5  | 153.392 | 6.95 | 1600000  | 2200000  | 1900000  | 26.47304 |
| Q689Z5 | Protein strawberry notch homolog 1 OS=Mus musculus GN=Sbno1 PE=1 SV=2                                | 0.935252 | 1  | 3  | 1  | 153.642 | 8.07 |          | 870000   |          | 7.495418 |
| Q5FWI3 | Transmembrane protein 2 OS=Mus musculus GN=Tmem2 PE=1 SV=1                                           | 1.156905 | 1  | 1  | 1  | 153.704 | 7.78 |          |          | 320000   | 2.680209 |
| O88322 | Nidogen-2 OS=Mus musculus GN=Nid2 PE=1 SV=2                                                          | 5.274412 | 5  | 11 | 4  | 153.816 | 5.38 | 2300000  | 2100000  | 2800000  | 31.92629 |
| Q6PGC1 | ATP-dependent RNA helicase Dhx29 OS=Mus musculus GN=Dhx29 PE=1 SV=1                                  | 4.175824 | 4  | 5  | 4  | 153.879 | 7.94 | 910000   | 1100000  | 920000   | 13.98927 |
| O35099 | Mitogen-activated protein kinase kinase 5 OS=Mus musculus GN=Map3k5 PE=1 SV=3                        | 0.507246 | 1  | 4  | 1  | 154.414 | 5.78 | 18000000 | 17000000 | 2400000  | 8.44165  |
| Q9CU65 | Zinc finger MYM-type protein 2 OS=Mus musculus GN=Zmym2 PE=1 SV=3                                    | 2.107558 | 2  | 6  | 2  | 154.541 | 6.37 | 760000   | 740000   | 510000   | 18.08458 |
| Q8BZH4 | Pogo transposable element with ZNF domain OS=Mus musculus GN=Pogz PE=1 SV=2                          | 5.110007 | 5  | 11 | 5  | 154.812 | 7.52 | 790000   | 1100000  | 1000000  | 36.14917 |
| Q99P88 | Nuclear pore complex protein Nup155 OS=Mus musculus GN=Nup155 PE=1 SV=1                              | 5.176132 | 6  | 15 | 6  | 155.019 | 6.15 | 4000000  | 4000000  | 4000000  | 39.54627 |
| Q9R0I7 | YLP motif-containing protein 1 OS=Mus musculus GN=Ylpm1 PE=2 SV=2                                    | 1.731602 | 2  | 3  | 2  | 155.032 | 6.65 | 2500000  | 1500000  |          | 6.734203 |
| Q55SZ5 | Tensin-3 OS=Mus musculus GN=Tns3 PE=1 SV=1                                                           | 2.222222 | 2  | 4  | 2  | 155.491 | 6.65 | 1900000  | 1300000  | 1500000  | 13.30232 |
| P15208 | Insulin receptor OS=Mus musculus GN=Insr PE=1 SV=2                                                   | 2.113703 | 2  | 3  | 2  | 155.51  | 5.95 | 690000   | 650000   | 320000   | 7.947726 |
| Q8KZ24 | Condensin complex subunit 1 OS=Mus musculus GN=Ncapd2 PE=1 SV=2                                      | 5.316092 | 4  | 8  | 4  | 155.567 | 6.38 | 1800000  | 3000000  | 2000000  | 25.19335 |
| Q8BLX7 | Collagen alpha-1(XVI) chain OS=Mus musculus GN=Col16a1 PE=1 SV=2                                     | 2.911392 | 3  | 8  | 3  | 155.707 | 7.91 | 2200000  | 1500000  | 610000   | 19.51003 |
| Q922J3 | CAP-Gly domain-containing linker protein 1 OS=Mus musculus GN=Clip1 PE=1 SV=1                        | 7.620417 | 8  | 15 | 6  | 155.718 | 5.24 | 1700000  | 1600000  | 1300000  | 44.47577 |

|        |                                                                                                                 |          |    |     |    |         |      |          |          |          |          |
|--------|-----------------------------------------------------------------------------------------------------------------|----------|----|-----|----|---------|------|----------|----------|----------|----------|
| Q9ESU6 | Bromodomain-containing protein 4 OS=Mus musculus GN=Brd4 PE=1 SV=2                                              | 2.571429 | 2  | 4   | 2  | 155.798 | 9.19 | 2400000  | 1700000  | 2400000  | 10.38856 |
| Q91ZV0 | Melanoma inhibitory activity protein 2 OS=Mus musculus GN=Mia2 PE=1 SV=3                                        | 5.659026 | 6  | 10  | 6  | 156.365 | 4.55 | 1100000  | 2000000  | 820000   | 29.48897 |
| Q6PB66 | Leucine-rich PPR motif-containing protein, mitochondrial OS=Mus musculus GN=Lrpprc PE=1 SV=2                    | 7.255747 | 9  | 17  | 9  | 156.516 | 6.83 | 1400000  | 2200000  | 1100000  | 47.70379 |
| Q8BY87 | Ubiquitin carboxyl-terminal hydrolase 47 OS=Mus musculus GN=Usp47 PE=1 SV=2                                     | 5.813953 | 5  | 6   | 5  | 157.356 | 5.11 | 510000   | 490000   | 370000   | 17.93519 |
| P70335 | Rho-associated protein kinase 1 OS=Mus musculus GN=Rock1 PE=1 SV=1                                              | 5.982275 | 7  | 12  | 5  | 158.072 | 5.86 | 1600000  | 1800000  | 1500000  | 30.06621 |
| Q920W3 | Nuclear pore complex protein Nup160 OS=Mus musculus GN=Nup160 PE=1 SV=2                                         | 2.282454 | 3  | 6   | 3  | 158.13  | 5.52 | 1100000  | 1600000  | 2000000  | 13.61713 |
| Q6P9L6 | Kinesin-like protein KIF15 OS=Mus musculus GN=Kif15 PE=1 SV=1                                                   | 2.451334 | 2  | 3   | 2  | 160.021 | 6.05 | 280000   | 310000   |          | 8.429106 |
| P61406 | Telomerase-binding protein EST1A OS=Mus musculus GN=Smg6 PE=1 SV=1                                              | 0.634697 | 1  | 1   | 1  | 160.396 | 6.77 |          |          |          | 2.324064 |
| P70336 | Rho-associated protein kinase 2 OS=Mus musculus GN=Rock2 PE=1 SV=1                                              | 12.89625 | 16 | 36  | 14 | 160.485 | 5.99 | 7400000  | 5700000  | 5000000  | 93.1948  |
| P02463 | Collagen alpha-1(IV) chain OS=Mus musculus GN=Col4a1 PE=1 SV=4                                                  | 2.995806 | 4  | 18  | 4  | 160.579 | 8.24 | 5500000  | 5600000  | 4900000  | 54.05297 |
| Q8CGB3 | Uveal autoantigen with coiled-coil domains and ankyrin repeats OS=Mus musculus GN=Uaca PE=1 SV=2                | 4.394047 | 5  | 8   | 5  | 160.714 | 7.2  | 1400000  | 590000   | 1000000  | 24.07602 |
| Q9EPU4 | Cleavage and polyadenylation specificity factor subunit 1 OS=Mus musculus GN=Cpsf1 PE=1 SV=1                    | 2.012491 | 2  | 7   | 2  | 160.716 | 6.39 | 1500000  | 1700000  | 1600000  | 21.6396  |
| Q7TPM1 | Protein PRRC2B OS=Mus musculus GN=Prcc2b PE=1 SV=1                                                              | 2.557201 | 2  | 5   | 2  | 160.814 | 8.16 | 480000   | 450000   | 390000   | 17.15943 |
| Q8BL66 | Early endosome antigen 1 OS=Mus musculus GN=Eea1 PE=1 SV=2                                                      | 8.433735 | 10 | 19  | 10 | 160.817 | 5.77 | 2200000  | 2100000  | 1500000  | 49.40381 |
| Q8R422 | CD109 antigen OS=Mus musculus GN=Cd109 PE=1 SV=1                                                                | 4.230236 | 5  | 10  | 5  | 161.557 | 5.57 | 3300000  | 1900000  | 2800000  | 27.27477 |
| Q5DU25 | IQ motif and SEC7 domain-containing protein 2 OS=Mus musculus GN=Iqsec2 PE=1 SV=3                               | 2.232747 | 3  | 3   | 1  | 161.687 | 8.56 | 440000   |          |          | 6.455737 |
| P23116 | Eukaryotic translation initiation factor 3 subunit A OS=Mus musculus GN=Eif3a PE=1 SV=5                         | 17.63393 | 26 | 71  | 26 | 161.838 | 6.77 | 13000000 | 12000000 | 13000000 | 192.9029 |
| Q6RHR9 | Membrane-associated guanylate kinase, WW and PDZ domain-containing protein 1 OS=Mus musculus GN=Magi1 PE=1 SV=1 | 0.951734 | 1  | 2   | 1  | 161.876 | 7.36 |          | 550000   | 550000   | 4.793185 |
| Q6PAR5 | GTPase-activating protein and VPS9 domain-containing protein 1 OS=Mus musculus GN=Gapvd1 PE=1 SV=2              | 0.754458 | 1  | 1   | 1  | 162.3   | 5.19 |          | 920000   |          | 2.423391 |
| Q1W617 | Protein Shroom4 OS=Mus musculus GN=Shroom4 PE=1 SV=1                                                            | 1.288136 | 1  | 1   | 1  | 163.137 | 6.73 |          | 150000   |          | 2.575413 |
| Q8C1B1 | Calmodulin-regulated spectrin-associated protein 2 OS=Mus musculus GN=Camsap2 PE=1 SV=3                         | 1.779603 | 2  | 2   | 2  | 164.23  | 6.86 |          | 900000   |          | 4.651211 |
| Q4VA53 | Sister chromatid cohesion protein PDS5 homolog B OS=Mus musculus GN=Pds5b PE=1 SV=1                             | 12.30982 | 14 | 27  | 13 | 164.315 | 8.5  | 4000000  | 3200000  | 4300000  | 71.83356 |
| Q69ZA1 | Cyclin-dependent kinase 13 OS=Mus musculus GN=Cdk13 PE=1 SV=3                                                   | 2.845797 | 4  | 8   | 3  | 164.452 | 9.69 | 630000   | 510000   |          | 20.0365  |
| A2A6A1 | G patch domain-containing protein 8 OS=Mus musculus GN=Gpatch8 PE=1 SV=1                                        | 1.993355 | 2  | 2   | 2  | 164.888 | 7.64 |          | 1100000  | 810000   | 5.951295 |
| Q3UQ28 | Peroxidasin homolog OS=Mus musculus GN=Pxdn PE=1 SV=2                                                           | 0.881356 | 1  | 1   | 1  | 164.998 | 7.14 | 270000   |          |          | 2.257228 |
| P28665 | Murinoglobulin-1 OS=Mus musculus GN=Mug1 PE=1 SV=3                                                              | 4.810298 | 6  | 14  | 6  | 165.193 | 6.42 | 2000000  | 2000000  | 1500000  | 35.33922 |
| Q61838 | Pregnancy zone protein OS=Mus musculus GN=Pzp PE=1 SV=3                                                         | 5.618729 | 8  | 17  | 8  | 165.748 | 6.68 | 5600000  | 7000000  | 5400000  | 43.24908 |
| Q01097 | Glutamate receptor ionotropic, NMDA 2B OS=Mus musculus GN=Grin2b PE=1 SV=3                                      | 0.674764 | 1  | 1   | 1  | 165.853 | 6.87 | 410000   |          |          | 1.957385 |
| Q8BX17 | Gem-associated protein 5 OS=Mus musculus GN=Gemin5 PE=1 SV=2                                                    | 5.05992  | 5  | 12  | 5  | 166.487 | 6.71 | 1800000  | 1800000  | 1800000  | 37.42174 |
| Q64449 | C-type mannose receptor 2 OS=Mus musculus GN=Mrc2 PE=1 SV=3                                                     | 0.878972 | 1  | 2   | 1  | 166.968 | 5.99 |          |          |          | 5.544687 |
| Q925J9 | Mediator of RNA polymerase II transcription subunit 1 OS=Mus musculus GN=Med1 PE=1 SV=2                         | 1.84127  | 2  | 3   | 2  | 167.036 | 8.73 |          | 740000   | 960000   | 7.552844 |
| P55937 | Golgin subfamily A member 3 OS=Mus musculus GN=Golga3 PE=1 SV=3                                                 | 8.944183 | 10 | 24  | 10 | 167.118 | 5.4  | 2300000  | 2200000  | 2100000  | 75.42687 |
| P08122 | Collagen alpha-2(IV) chain OS=Mus musculus GN=Col4a2 PE=1 SV=4                                                  | 3.04628  | 4  | 10  | 4  | 167.22  | 8.48 | 4800000  | 12000000 | 5600000  | 25.19925 |
| P33609 | DNA polymerase alpha catalytic subunit OS=Mus musculus GN=Pola1 PE=1 SV=2                                       | 3.208191 | 3  | 4   | 3  | 167.233 | 5.74 |          | 830000   | 710000   | 12.16018 |
| Q5BLK4 | Terminal uridylyltransferase 7 OS=Mus musculus GN=Zcchc6 PE=1 SV=3                                              | 4.091214 | 3  | 5   | 3  | 168.996 | 6.65 | 350000   | 1000000  | 680000   | 13.65187 |
| Q80TV8 | CLIP-associating protein 1 OS=Mus musculus GN=Clasp1 PE=1 SV=2                                                  | 3.843648 | 4  | 7   | 4  | 169.123 | 9.03 | 860000   | 1100000  | 2100000  | 21.14189 |
| Q8CAF4 | NHS-like protein 1 OS=Mus musculus GN=Nhsl1 PE=1 SV=3                                                           | 2.457467 | 2  | 2   | 2  | 169.315 | 7.49 |          |          | 230000   | 6.786838 |
| Q8CGC7 | Bifunctional glutamate/proline--tRNA ligase OS=Mus musculus GN=Eprs PE=1 SV=4                                   | 23.01587 | 27 | 65  | 27 | 169.972 | 7.66 | 13000000 | 13000000 | 11000000 | 192.3106 |
| Q8CFQ3 | Intron-binding protein aquarius OS=Mus musculus GN=Aqr PE=1 SV=2                                                | 2.228224 | 3  | 4   | 3  | 170.185 | 6.27 |          | 830000   | 1100000  | 9.491365 |
| Q91YM2 | Rho GTPase-activating protein 35 OS=Mus musculus GN=Arhgap35 PE=1 SV=3                                          | 1.334223 | 2  | 4   | 2  | 170.285 | 6.61 | 1100000  | 780000   | 1300000  | 10.43315 |
| Q9Z277 | Tyrosine-protein kinase BAZ1B OS=Mus musculus GN=Baz1b PE=1 SV=2                                                | 9.398242 | 11 | 28  | 11 | 170.544 | 8.6  | 5100000  | 3500000  | 3900000  | 81.09051 |
| Q3UH60 | Disco-interacting protein 2 homolog B OS=Mus musculus GN=Dip2b PE=1 SV=1                                        | 2.92249  | 3  | 9   | 3  | 171.017 | 8.09 | 2100000  | 1600000  | 1400000  | 24.56342 |
| O35379 | Multidrug resistance-associated protein 1 OS=Mus musculus GN=Abcc1 PE=1 SV=1                                    | 1.374346 | 1  | 2   | 1  | 171.075 | 7.36 |          |          | 310000   | 6.547547 |
| Q64739 | Collagen alpha-2(XI) chain OS=Mus musculus GN=Col11a2 PE=2 SV=3                                                 | 1.382488 | 2  | 6   | 2  | 171.431 | 6.48 | 2600000  | 2600000  | 2100000  | 16.54259 |
| Q8R4H2 | Rho guanine nucleotide exchange factor 12 OS=Mus musculus GN=Arhgef12 PE=1 SV=2                                 | 0.842515 | 1  | 3   | 1  | 172.242 | 5.74 |          | 1000000  | 120000   | 6.526386 |
| Q8CHC4 | Synaptojanin-1 OS=Mus musculus GN=Synj1 PE=1 SV=3                                                               | 4.510801 | 5  | 10  | 5  | 172.509 | 6.89 | 3900000  | 2700000  | 1500000  | 33.39039 |
| Q01320 | DNA topoisomerase 2-alpha OS=Mus musculus GN=Top2a PE=1 SV=2                                                    | 23.29843 | 31 | 76  | 21 | 172.682 | 8.6  | 11000000 | 15000000 | 15000000 | 222.5312 |
| Q99PL5 | Ribosome-binding protein 1 OS=Mus musculus GN=Rrbp1 PE=1 SV=2                                                   | 25.42056 | 35 | 115 | 35 | 172.776 | 9.33 | 27000000 | 32000000 | 31000000 | 374.5463 |
| Q80U72 | Protein scribble homolog OS=Mus musculus GN=Scrib PE=1 SV=2                                                     | 1.861042 | 2  | 3   | 2  | 173.952 | 5.12 | 720000   |          | 750000   | 7.605809 |
| Q80XI3 | Eukaryotic translation initiation factor 4 gamma 3 OS=Mus musculus GN=Eif4g3 PE=1 SV=2                          | 9.183027 | 11 | 25  | 10 | 174.781 | 5.53 | 1400000  | 1700000  | 1400000  | 68.28318 |
| Q80TM9 | Nischarin OS=Mus musculus GN=Nisch PE=1 SV=2                                                                    | 1.506591 | 1  | 1   | 1  | 174.903 | 5.16 |          |          | 300000   | 2.367632 |
| Q6A065 | Centrosomal protein of 170 kDa OS=Mus musculus GN=Cep170 PE=1 SV=2                                              | 3.085642 | 4  | 9   | 4  | 174.943 | 7.17 | 1600000  | 1400000  | 600000   | 24.62544 |
| Q3UHC0 | Trinucleotide repeat-containing gene 6C protein OS=Mus musculus GN=Trnc6c PE=1 SV=2                             | 1.538462 | 1  | 1   | 1  | 175.667 | 6.86 |          | 50000    |          | 3.489697 |

|        |                                                                                                                   |          |    |     |    |         |      |          |          |          |          |
|--------|-------------------------------------------------------------------------------------------------------------------|----------|----|-----|----|---------|------|----------|----------|----------|----------|
| Q6NZJ6 | Eukaryotic translation initiation factor 4 gamma 1 OS=Mus musculus GN=Eif4g1 PE=1 SV=1                            | 15.9375  | 20 | 50  | 19 | 175.967 | 5.4  | 9600000  | 10000000 | 9800000  | 146.5586 |
| Q6P5E4 | UDP-glucose:glycoprotein glucosyltransferase 1 OS=Mus musculus GN=Uggt1 PE=1 SV=4                                 | 17.60155 | 21 | 49  | 21 | 176.323 | 5.62 | 13000000 | 11000000 | 9700000  | 140.8715 |
| P02468 | Laminin subunit gamma-1 OS=Mus musculus GN=Lamc1 PE=1 SV=2                                                        | 19.47729 | 25 | 63  | 25 | 177.185 | 5.21 | 7500000  | 9000000  | 8700000  | 190.0672 |
| Q88379 | Bromodomain adjacent to zinc finger domain protein 1A OS=Mus musculus GN=Baz1a PE=1 SV=3                          | 1.093248 | 2  | 3   | 2  | 178.349 | 6.54 | 8800000  | 3600000  | 9300000  | 6.142228 |
| Q8K4G1 | Latent-transforming growth factor beta-binding protein 4 OS=Mus musculus GN=Ltbp4 PE=1 SV=2                       | 3.961585 | 4  | 5   | 4  | 178.523 | 5.47 | 1100000  | 7200000  | 4600000  | 15.20464 |
| Q3URU2 | Paternally-expressed gene 3 protein OS=Mus musculus GN=Peg3 PE=1 SV=1                                             | 0.954806 | 1  | 2   | 1  | 178.822 | 5.45 | 4600000  | 7000000  |          | 5.134691 |
| Q69237 | Sterile alpha motif domain-containing protein 9-like OS=Mus musculus GN=Samd9l PE=1 SV=2                          | 2.626521 | 3  | 7   | 3  | 180.089 | 6.99 | 1500000  | 1200000  | 1300000  | 21.62676 |
| Q3UQ44 | Ras GTPase-activating-like protein IQGAP2 OS=Mus musculus GN=Iqgap2 PE=1 SV=2                                     | 6.222222 | 8  | 16  | 6  | 180.416 | 5.64 | 8700000  | 8200000  | 11000000 | 40.63136 |
| Q9WQT5 | A-kinase anchor protein 12 OS=Mus musculus GN=Akap12 PE=1 SV=1                                                    | 18.17102 | 19 | 45  | 19 | 180.586 | 4.44 | 4100000  | 3000000  | 2700000  | 143.5999 |
| Q61245 | Collagen alpha-1(XI) chain OS=Mus musculus GN=Col11a1 PE=1 SV=2                                                   | 4.711752 | 6  | 13  | 6  | 180.921 | 5.21 | 6900000  | 11000000 | 8600000  | 30.95573 |
| Q3TKT4 | Transcription activator BRG1 OS=Mus musculus GN=Smarca4 PE=1 SV=1                                                 | 8.431494 | 11 | 28  | 11 | 181.313 | 8    | 4200000  | 4300000  | 4800000  | 74.26286 |
| P58871 | 182 kDa tankyrase-1-binding protein OS=Mus musculus GN=Tnks1bp1 PE=1 SV=2                                         | 5.465116 | 6  | 12  | 6  | 181.714 | 4.88 | 1300000  | 5900000  | 9800000  | 32.57068 |
| Q64511 | DNA topoisomerase 2-beta OS=Mus musculus GN=Top2b PE=1 SV=2                                                       | 17.12159 | 24 | 69  | 14 | 181.795 | 8.29 | 4200000  | 4600000  | 4400000  | 196.7001 |
| P39061 | Collagen alpha-1(XVIII) chain OS=Mus musculus GN=Col18a1 PE=1 SV=4                                                | 8.455468 | 11 | 26  | 11 | 182.059 | 5.62 | 14000000 | 10000000 | 14000000 | 77.9938  |
| B1AZI6 | THO complex subunit 2 OS=Mus musculus GN=Thoc2 PE=1 SV=1                                                          | 3.199498 | 5  | 8   | 5  | 182.658 | 8.44 | 1000000  | 4700000  | 1400000  | 14.23803 |
| Q62230 | Sialoadhesin OS=Mus musculus GN=Siglec1 PE=1 SV=2                                                                 | 0.766962 | 1  | 1   | 1  | 182.865 | 6.67 |          |          |          | 1.94105  |
| P13864 | DNA (cytosine-5)-methyltransferase 1 OS=Mus musculus GN=Dnmt1 PE=1 SV=5                                           | 16.23457 | 19 | 43  | 19 | 183.074 | 7.74 | 4600000  | 5200000  | 5200000  | 134.4936 |
| Q88207 | Collagen alpha-1(V) chain OS=Mus musculus GN=Col5a1 PE=1 SV=2                                                     | 0.707291 | 1  | 3   | 1  | 183.564 | 4.98 | 7300000  | 7700000  | 7100000  | 11.57436 |
| A6H619 | PHD and RING finger domain-containing protein 1 OS=Mus musculus GN=Phrf1 PE=1 SV=2                                | 1.36742  | 1  | 1   | 1  | 183.968 | 8.59 |          |          |          | 2.323309 |
| B2RX14 | Terminal uridylyltransferase 4 OS=Mus musculus GN=Zcchc11 PE=1 SV=2                                               | 0.547445 | 1  | 1   | 1  | 184.532 | 8.19 |          |          | 550000   | 2.168504 |
| Q5PSV9 | Mediator of DNA damage checkpoint protein 1 OS=Mus musculus GN=Mdc1 PE=1 SV=1                                     | 10.77914 | 11 | 19  | 11 | 184.558 | 5.19 | 2400000  | 2100000  | 1900000  | 58.25554 |
| Q69ZK0 | Phosphatidylinositol 3,4,5-trisphosphate-dependent Rac exchanger 1 protein OS=Mus musculus GN=Prex1 PE=1 SV=2     | 2.909091 | 2  | 4   | 2  | 184.818 | 6.29 | 710000   | 1000000  |          | 10.80074 |
| Q6PB44 | Tyrosine-protein phosphatase non-receptor type 23 OS=Mus musculus GN=Ptpn23 PE=1 SV=2                             | 1.06383  | 1  | 2   | 1  | 185.1   | 6.8  | 6900000  | 4800000  |          | 5.678161 |
| Q99MV7 | RING finger protein 17 OS=Mus musculus GN=Rnf17 PE=1 SV=2                                                         | 0.487805 | 1  | 1   | 1  | 185.48  | 5.48 | 980000   |          |          | 2.609912 |
| Q8C0T9 | Adenylate cyclase type 10 OS=Mus musculus GN=Adcy10 PE=2 SV=2                                                     | 1.115242 | 1  | 1   | 1  | 186.29  | 6.9  | 4100000  |          |          | 2.268139 |
| P01027 | Complement C3 OS=Mus musculus GN=C3 PE=1 SV=3                                                                     | 9.260373 | 11 | 28  | 11 | 186.366 | 6.73 | 3500000  | 4200000  | 3000000  | 83.06149 |
| Q9QXL2 | Kinesin-like protein KIF21A OS=Mus musculus GN=Kif21a PE=1 SV=2                                                   | 4.784689 | 5  | 11  | 5  | 186.42  | 6.27 | 1800000  | 1300000  | 7500000  | 33.91546 |
| Q8BSQ9 | Protein polybromo-1 OS=Mus musculus GN=Pbrm1 PE=1 SV=4                                                            | 1.529988 | 2  | 3   | 2  | 187.069 | 6.9  | 1500000  | 1800000  | 2000000  | 7.442332 |
| Q9JKF1 | Ras GTPase-activating-like protein IQGAP1 OS=Mus musculus GN=Iqgap1 PE=1 SV=2                                     | 31.80447 | 43 | 126 | 41 | 188.624 | 6.48 | 21000000 | 19000000 | 16000000 | 399.4422 |
| P06684 | Complement C5 OS=Mus musculus GN=C5 PE=1 SV=2                                                                     | 2.440476 | 3  | 4   | 3  | 188.759 | 6.81 | 4600000  |          | 800000   | 10.0602  |
| Q9Z0R6 | Intersectin-2 OS=Mus musculus GN=Itsn2 PE=1 SV=2                                                                  | 1.3261   | 2  | 4   | 2  | 188.789 | 8.13 | 1200000  | 7900000  | 7700000  | 10.3986  |
| Q61194 | Phosphatidylinositol 4-phosphate 3-kinase C2 domain-containing subunit alpha OS=Mus musculus GN=Pik3c2a PE=1 SV=2 | 1.542112 | 2  | 2   | 2  | 190.637 | 8.02 |          | 840000   |          | 4.708306 |
| Q68FD5 | Clathrin heavy chain 1 OS=Mus musculus GN=Cltc PE=1 SV=3                                                          | 32.29851 | 44 | 140 | 44 | 191.435 | 5.69 | 75000000 | 64000000 | 59000000 | 433.9667 |
| Q8BK12 | Trinucleotide repeat-containing gene 6B protein OS=Mus musculus GN=Trnc6b PE=1 SV=2                               | 0.939227 | 1  | 1   | 1  | 191.845 | 6.3  |          |          |          | 2.303348 |
| Q8BJ34 | Meiosis arrest female protein 1 OS=Mus musculus GN=Marf1 PE=1 SV=3                                                | 0.404624 | 1  | 3   | 1  | 191.942 | 8.22 | 1100000  |          | 930000   | 6.133669 |
| Q3UXZ9 | Lysine-specific demethylase 5A OS=Mus musculus GN=Kdm5a PE=1 SV=2                                                 | 0.946746 | 1  | 1   | 1  | 192.093 | 6.39 |          |          | 2500000  | 2.293927 |
| P01029 | Complement C4-B OS=Mus musculus GN=C4b PE=1 SV=3                                                                  | 9.95397  | 14 | 35  | 14 | 192.794 | 7.53 | 6300000  | 6800000  | 6600000  | 97.00583 |
| Q35134 | DNA-directed RNA polymerase I subunit RPA1 OS=Mus musculus GN=Polr1a PE=1 SV=2                                    | 3.610949 | 3  | 5   | 3  | 193.987 | 6.93 | 2700000  | 1100000  |          | 16.5927  |
| Q9Z0R4 | Intersectin-1 OS=Mus musculus GN=Itsn1 PE=1 SV=2                                                                  | 1.575263 | 2  | 5   | 2  | 194.176 | 7.91 | 1600000  | 9900000  | 7600000  | 14.94564 |
| P97789 | 5'-3' exoribonuclease 1 OS=Mus musculus GN=Xrn1 PE=1 SV=1                                                         | 2.094241 | 2  | 2   | 2  | 194.185 | 7.5  | 2400000  |          | 11000000 | 5.5123   |
| Q8CHG3 | GRIP and coiled-coil domain-containing protein 2 OS=Mus musculus GN=Gcc2 PE=1 SV=2                                | 2.561048 | 3  | 6   | 3  | 194.325 | 5.12 | 610000   | 860000   | 350000   | 16.40942 |
| P39447 | Tight junction protein ZO-1 OS=Mus musculus GN=Tjp1 PE=1 SV=2                                                     | 13.46705 | 18 | 39  | 18 | 194.622 | 6.64 | 8400000  | 6700000  | 7600000  | 121.2865 |
| Q7TT50 | Serine/threonine-protein kinase MRCK beta OS=Mus musculus GN=Cdc42bpb PE=1 SV=2                                   | 3.03561  | 4  | 8   | 4  | 194.63  | 6.46 | 1500000  | 1700000  | 1400000  | 25.65304 |
| P40201 | Chromodomain-helicase-DNA-binding protein 1 OS=Mus musculus GN=Chd1 PE=1 SV=3                                     | 5.084746 | 5  | 9   | 5  | 196.264 | 7.37 | 970000   | 600000   | 1100000  | 25.52011 |
| Q61292 | Laminin subunit beta-2 OS=Mus musculus GN=Lamb2 PE=1 SV=2                                                         | 10.28349 | 14 | 27  | 13 | 196.451 | 6.67 | 2600000  | 3600000  | 3700000  | 68.68743 |
| Q8C0T5 | Signal-induced proliferation-associated 1-like protein 1 OS=Mus musculus GN=Sipa1l1 PE=1 SV=2                     | 1.851852 | 2  | 3   | 2  | 196.909 | 8.13 | 500000   | 280000   |          | 9.399401 |
| P02469 | Laminin subunit beta-1 OS=Mus musculus GN=Lamb1 PE=1 SV=3                                                         | 11.42217 | 14 | 31  | 13 | 196.961 | 4.94 | 5300000  | 7000000  | 6300000  | 90.95953 |
| Q6PFD9 | Nuclear pore complex protein Nup98-Nup96 OS=Mus musculus GN=Nup98 PE=1 SV=2                                       | 3.634361 | 5  | 9   | 5  | 197.118 | 6.18 | 1600000  | 2600000  | 1800000  | 25.93634 |
| Q60767 | Lymphocyte antigen 75 OS=Mus musculus GN=Ly75 PE=1 SV=2                                                           | 0.870575 | 1  | 1   | 1  | 197.225 | 6.39 | 7100000  |          |          | 2.618113 |
| Q6A009 | E3 ubiquitin-protein ligase listerin OS=Mus musculus GN=Ltn1 PE=1 SV=3                                            | 1.6412   | 2  | 4   | 2  | 198.793 | 6.55 | 1800000  | 1400000  | 510000   | 14.06261 |
| Q62383 | Transcription elongation factor SPT6 OS=Mus musculus GN=Supt6h PE=1 SV=2                                          | 5.735805 | 6  | 13  | 6  | 198.962 | 4.93 | 830000   | 830000   | 1100000  | 36.09366 |
| P20357 | Microtubule-associated protein 2 OS=Mus musculus GN=Map2 PE=1 SV=2                                                | 13.45733 | 18 | 34  | 18 | 199.01  | 4.91 | 7900000  | 4500000  | 2700000  | 99.24174 |
| P97868 | E3 ubiquitin-protein ligase RBBP6 OS=Mus musculus GN=Rbbp6 PE=1 SV=5                                              | 3.072626 | 4  | 9   | 4  | 199.466 | 9.63 | 1000000  | 1100000  | 1100000  | 25.40926 |



|        |                                                                                                                      |          |     |     |    |         |      |          |          |          |          |
|--------|----------------------------------------------------------------------------------------------------------------------|----------|-----|-----|----|---------|------|----------|----------|----------|----------|
| Q0VGY8 | Protein TANC1 OS=Mus musculus GN=Tanc1 PE=1 SV=2                                                                     | 0.700431 | 1   | 1   | 1  | 200.679 | 8.35 |          | 590000   |          | 2.629297 |
| A2AIV2 | Protein virilizer homolog OS=Mus musculus GN=Kiaa1429 PE=1 SV=1                                                      | 0.717835 | 1   | 2   | 1  | 201.313 | 4.96 |          | 880000   | 800000   | 5.867517 |
| P97927 | Laminin subunit alpha-4 OS=Mus musculus GN=Lama4 PE=1 SV=2                                                           | 9.251101 | 11  | 19  | 11 | 201.692 | 6.21 | 2300000  | 3700000  | 3300000  | 50.65098 |
| A2A5R2 | Brefeldin A-inhibited guanine nucleotide-exchange protein 2 OS=Mus musculus GN=Arfgef2 PE=1 SV=1                     | 2.287946 | 3   | 3   | 3  | 202.11  | 6.55 | 560000   | 550000   | 720000   | 8.597274 |
| Q6PDI5 | Proteasome-associated protein ECM29 homolog OS=Mus musculus GN=Ecm29 PE=1 SV=3                                       | 3.913043 | 5   | 8   | 5  | 203.573 | 7.06 | 950000   | 1000000  | 750000   | 23.97787 |
| E9Q784 | Zinc finger CCH domain-containing protein 13 OS=Mus musculus GN=Zc3h13 PE=1 SV=1                                     | 0.75188  | 1   | 2   | 1  | 203.635 | 9.38 |          | 1200000  | 1000000  | 4.850768 |
| Q2EMV9 | Poly [ADP-ribose] polymerase 14 OS=Mus musculus GN=Parp14 PE=1 SV=3                                                  | 5.72372  | 7   | 14  | 7  | 203.674 | 6.79 | 1500000  | 1700000  | 1800000  | 36.27764 |
| Q9QY81 | Nuclear pore membrane glycoprotein 210 OS=Mus musculus GN=Nup210 PE=1 SV=2                                           | 2.704136 | 3   | 6   | 3  | 203.973 | 6.65 | 2400000  | 1400000  | 1300000  | 16.50189 |
| B2RXS4 | Plexin-B2 OS=Mus musculus GN=Plxb2 PE=1 SV=1                                                                         | 3.474484 | 5   | 7   | 5  | 206.099 | 5.87 | 710000   | 670000   | 1200000  | 18.83012 |
| Q9QZQ1 | Afadin OS=Mus musculus GN=Mllt4 PE=1 SV=3                                                                            | 3.791209 | 5   | 11  | 5  | 206.371 | 6.32 | 1700000  | 1200000  | 750000   | 32.47821 |
| Q8VDD9 | PH-interacting protein OS=Mus musculus GN=Phip PE=1 SV=2                                                             | 1.812191 | 2   | 6   | 2  | 206.596 | 8.82 | 1600000  | 1400000  | 1900000  | 21.22524 |
| Q6P5H2 | Nestin OS=Mus musculus GN=Nes PE=1 SV=1                                                                              | 35.78326 | 43  | 121 | 43 | 207     | 4.34 | 15000000 | 15000000 | 18000000 | 392.583  |
| A2ASQ1 | Agrin OS=Mus musculus GN=Agrn PE=1 SV=1                                                                              | 4.153846 | 6   | 13  | 6  | 207.403 | 6.32 | 1300000  | 1700000  | 1500000  | 40.48429 |
| Q6NS46 | Protein RRP5 homolog OS=Mus musculus GN=Pdcd11 PE=1 SV=2                                                             | 4.296455 | 5   | 8   | 5  | 207.649 | 8.75 | 2300000  | 820000   | 2500000  | 23.97645 |
| G3X9K3 | Brefeldin A-inhibited guanine nucleotide-exchange protein 1 OS=Mus musculus GN=Arfgef1 PE=1 SV=1                     | 3.141928 | 4   | 5   | 4  | 208.368 | 5.86 | 290000   | 460000   | 520000   | 13.21744 |
| Q6ZPE2 | Myotubularin-related protein 5 OS=Mus musculus GN=Sbf1 PE=1 SV=2                                                     | 2.731655 | 4   | 5   | 4  | 208.561 | 7.12 | 730000   | 510000   | 390000   | 10.49334 |
| Q91YE5 | Bromodomain adjacent to zinc finger domain protein 2A OS=Mus musculus GN=Baz2a PE=1 SV=2                             | 0.847009 | 1   | 1   | 1  | 209.487 | 6.51 |          |          |          | 2.984473 |
| Q61191 | Host cell factor 1 OS=Mus musculus GN=Hcfc1 PE=1 SV=2                                                                | 2.738386 | 5   | 9   | 5  | 210.306 | 7.18 | 3100000  | 2700000  | 2200000  | 22.48282 |
| P21271 | Unconventional myosin-Vb OS=Mus musculus GN=Myo5b PE=1 SV=2                                                          | 19.14191 | 28  | 59  | 23 | 210.438 | 7.11 | 4700000  | 5300000  | 4900000  | 172.0973 |
| P70399 | Tumor suppressor p53-binding protein 1 OS=Mus musculus GN=Tp53bp1 PE=1 SV=2                                          | 7.307103 | 9   | 19  | 9  | 211.209 | 4.63 | 1800000  | 2300000  | 2000000  | 61.87191 |
| Q8C3J5 | Dedicator of cytokinesis protein 2 OS=Mus musculus GN=Dock2 PE=1 SV=3                                                | 4.266958 | 7   | 15  | 7  | 211.568 | 6.99 | 2900000  | 3300000  | 2800000  | 41.07513 |
| Q6PDN3 | Myosin light chain kinase, smooth muscle OS=Mus musculus GN=Mylk PE=1 SV=3                                           | 0.515198 | 1   | 1   | 1  | 212.792 | 6.25 |          | 840000   |          | 2.710953 |
| Q80U93 | Nuclear pore complex protein Nup214 OS=Mus musculus GN=Nup214 PE=1 SV=2                                              | 0.719424 | 1   | 3   | 1  | 212.847 | 7.08 | 1400000  | 1700000  | 1600000  | 8.506969 |
| Q8CC88 | von Willebrand factor A domain-containing protein 8 OS=Mus musculus GN=Vwa8 PE=1 SV=2                                | 0.682415 | 1   | 1   | 1  | 213.287 | 6.6  | 920000   |          |          | 2.691186 |
| Q8BI84 | Melanoma inhibitory activity protein 3 OS=Mus musculus GN=Mia3 PE=1 SV=2                                             | 11.86528 | 15  | 31  | 15 | 213.544 | 4.75 | 3100000  | 2800000  | 2900000  | 90.09088 |
| Q64487 | Receptor-type tyrosine-protein phosphatase delta OS=Mus musculus GN=Ptpd PE=1 SV=3                                   | 2.144351 | 3   | 3   | 3  | 214.274 | 6.55 | 530000   | 420000   |          | 6.44431  |
| Q8CFT2 | Histone-lysine N-methyltransferase SETD1B OS=Mus musculus GN=Setd1b PE=1 SV=2                                        | 0.403023 | 1   | 2   | 1  | 215.217 | 4.96 | 3000000  | 4200000  |          | 3.97045  |
| Q99104 | Unconventional myosin-Va OS=Mus musculus GN=Myo5a PE=1 SV=2                                                          | 10.41554 | 18  | 36  | 13 | 215.402 | 8.63 | 5500000  | 4400000  | 3000000  | 96.57145 |
| Q5SNZ0 | Girdin OS=Mus musculus GN=Ccdc88a PE=1 SV=2                                                                          | 2.829685 | 4   | 8   | 4  | 215.786 | 6.24 | 1300000  | 730000   | 450000   | 21.62734 |
| P53995 | Anaphase-promoting complex subunit 1 OS=Mus musculus GN=Anapc1 PE=1 SV=2                                             | 1.028807 | 1   | 1   | 1  | 215.855 | 6.35 | 590000   |          |          | 2.491033 |
| P08775 | DNA-directed RNA polymerase II subunit RPB1 OS=Mus musculus GN=Polr2a PE=1 SV=3                                      | 7.15736  | 10  | 19  | 10 | 217.039 | 7.37 | 2500000  | 1900000  | 1800000  | 51.50875 |
| A8C756 | Thyroid adenoma-associated protein homolog OS=Mus musculus GN=Thada PE=1 SV=1                                        | 0.567595 | 1   | 1   | 1  | 217.15  | 6.25 |          | 210000   |          | 1.850821 |
| Q6PDQ2 | Chromodomain-helicase-DNA-binding protein 4 OS=Mus musculus GN=Chd4 PE=1 SV=1                                        | 19.06005 | 27  | 79  | 27 | 217.614 | 5.81 | 12000000 | 13000000 | 13000000 | 230.3806 |
| Q61464 | Zinc finger protein 638 OS=Mus musculus GN=Znf638 PE=1 SV=2                                                          | 6.020408 | 8   | 18  | 8  | 217.999 | 6.89 | 2500000  | 2700000  | 2400000  | 57.288   |
| Q8R151 | NFX1-type zinc finger-containing protein 1 OS=Mus musculus GN=Znfx1 PE=1 SV=3                                        | 2.985856 | 4   | 7   | 4  | 218.687 | 7.47 | 1200000  | 1400000  | 990000   | 21.46255 |
| P70670 | Nascent polypeptide-associated complex subunit alpha, muscle-specific form OS=Mus musculus GN=Naca PE=1 SV=2         | 1.920439 | 3   | 16  | 3  | 220.364 | 9.35 | 19000000 | 17000000 | 17000000 | 58.02378 |
| Q61282 | Aggrecan core protein OS=Mus musculus GN=Acan PE=1 SV=2                                                              | 2.06379  | 4   | 9   | 4  | 221.805 | 4.3  | 2600000  | 1300000  | 2100000  | 23.52817 |
| Q99KW3 | TRIO and F-actin-binding protein OS=Mus musculus GN=Triobp PE=1 SV=3                                                 | 1.390268 | 2   | 2   | 2  | 223.232 | 8.06 | 500000   |          | 750000   | 6.198935 |
| Q8CJ19 | Protein-methionine sulfoxide oxidase MICAL3 OS=Mus musculus GN=Mical3 PE=1 SV=2                                      | 0.652283 | 1   | 1   | 1  | 223.583 | 5.47 |          |          |          | 2.690964 |
| G5E870 | E3 ubiquitin-protein ligase TRIP12 OS=Mus musculus GN=Trip12 PE=1 SV=1                                               | 8.740741 | 13  | 23  | 13 | 223.988 | 8.35 | 4300000  | 3500000  | 3800000  | 73.96777 |
| A2AGT5 | Cytoskeleton-associated protein 5 OS=Mus musculus GN=Ckap5 PE=1 SV=1                                                 | 7.431102 | 12  | 30  | 12 | 225.492 | 7.96 | 4200000  | 3000000  | 3100000  | 87.12973 |
| Q6P5D8 | Structural maintenance of chromosomes flexible hinge domain-containing protein 1 OS=Mus musculus GN=Smchd1 PE=1 SV=2 | 9.018435 | 15  | 30  | 15 | 225.506 | 7.24 | 4300000  | 3900000  | 3500000  | 78.60147 |
| Q8VDD5 | Myosin-9 OS=Mus musculus GN=Myh9 PE=1 SV=4                                                                           | 49.84694 | 102 | 455 | 81 | 226.232 | 5.66 | 96000000 | 1E+08    | 91000000 | 1613.106 |
| O08638 | Myosin-11 OS=Mus musculus GN=Myh11 PE=1 SV=1                                                                         | 9.584178 | 19  | 53  | 4  | 226.888 | 5.45 | 8000000  | 34000000 | 1200000  | 175.6679 |
| Q6URW6 | Myosin-14 OS=Mus musculus GN=Myh14 PE=1 SV=1                                                                         | 10.7     | 16  | 37  | 10 | 228.446 | 5.55 | 13000000 | 14000000 | 20000000 | 129.5095 |
| A2APX8 | Sodium channel protein type 1 subunit alpha OS=Mus musculus GN=Scn1a PE=1 SV=1                                       | 0.647088 | 1   | 2   | 1  | 228.651 | 5.87 | 2400000  |          | 540000   | 5.993083 |
| Q9ROL6 | Pericentriolar material 1 protein OS=Mus musculus GN=Pcm1 PE=1 SV=2                                                  | 3.703704 | 5   | 8   | 5  | 228.706 | 5.01 | 680000   | 620000   | 870000   | 27.10129 |
| Q61879 | Myosin-10 OS=Mus musculus GN=Myh10 PE=1 SV=2                                                                         | 19.23077 | 32  | 75  | 17 | 228.855 | 5.54 | 7200000  | 3400000  | 4000000  | 241.8192 |
| Q7TSC1 | Protein PRRC2A OS=Mus musculus GN=Prrc2a PE=1 SV=1                                                                   | 6.904541 | 9   | 13  | 9  | 229.063 | 9.39 | 1000000  | 1100000  | 1600000  | 37.64143 |
| Q80YX1 | Tenascin OS=Mus musculus GN=Tnc PE=1 SV=1                                                                            | 33.83886 | 46  | 161 | 46 | 231.659 | 4.89 | 27000000 | 23000000 | 20000000 | 529.0777 |
| Q9JMH9 | Unconventional myosin-XVIIIa OS=Mus musculus GN=Myo18a PE=1 SV=2                                                     | 13.21951 | 21  | 39  | 21 | 232.611 | 6.28 | 5600000  | 4300000  | 4400000  | 114.8166 |
| Q69ZN7 | Myoferlin OS=Mus musculus GN=Myof PE=1 SV=2                                                                          | 8.59375  | 13  | 22  | 13 | 233.177 | 6.16 | 2900000  | 3100000  | 2200000  | 63.88479 |
| Q8BIK4 | Dedicator of cytokinesis protein 9 OS=Mus musculus GN=Dock9 PE=1 SV=2                                                | 3.552311 | 5   | 7   | 5  | 235.162 | 7.25 | 980000   | 760000   | 710000   | 18.66825 |

|        |                                                                                                      |          |    |     |    |         |       |          |          |          |          |
|--------|------------------------------------------------------------------------------------------------------|----------|----|-----|----|---------|-------|----------|----------|----------|----------|
| P49025 | Citron Rho-interacting kinase OS=Mus musculus GN=Cit PE=1 SV=3                                       | 0.778589 | 1  | 1   | 1  | 235.242 | 6.54  |          |          |          | 3.20767  |
| Q9Z1T6 | 1-phosphatidylinositol 3-phosphate 5-kinase OS=Mus musculus GN=Pikfyve PE=1 SV=3                     | 0.858369 | 1  | 1   | 1  | 236.727 | 6.68  |          | 820000   |          | 3.092295 |
| E9Q3L2 | Phosphatidylinositol 4-kinase alpha OS=Mus musculus GN=Pi4ka PE=1 SV=2                               | 2.327791 | 4  | 6   | 4  | 236.889 | 7.06  | 1500000  | 350000   | 800000   | 15.0947  |
| Q8K284 | General transcription factor 3C polypeptide 1 OS=Mus musculus GN=Gtf3c1 PE=1 SV=2                    | 0.951928 | 1  | 3   | 1  | 237.326 | 7.25  | 520000   | 880000   | 450000   | 11.09026 |
| Q9QY06 | Unconventional myosin-IXb OS=Mus musculus GN=Myo9b PE=1 SV=2                                         | 3.784295 | 5  | 12  | 5  | 238.685 | 8.63  | 1900000  | 1900000  | 1500000  | 43.41526 |
| Q8C147 | Dedicator of cytokinesis protein 8 OS=Mus musculus GN=Dock8 PE=1 SV=4                                | 2        | 4  | 8   | 3  | 238.826 | 6.96  | 1500000  | 890000   | 750000   | 25.85213 |
| Q8R1A4 | Dedicator of cytokinesis protein 7 OS=Mus musculus GN=Dock7 PE=1 SV=3                                | 7.464789 | 13 | 25  | 12 | 241.286 | 6.71  | 1700000  | 1900000  | 2300000  | 69.51891 |
| A2BH40 | AT-rich interactive domain-containing protein 1A OS=Mus musculus GN=Arid1a PE=1 SV=1                 | 2.890933 | 4  | 8   | 4  | 241.939 | 6.68  | 360000   | 1100000  | 1100000  | 27.45467 |
| Q8K4L3 | Supervillin OS=Mus musculus GN=Svil PE=1 SV=1                                                        | 2.02765  | 3  | 5   | 3  | 243.011 | 6.87  | 680000   | 580000   | 440000   | 12.81672 |
| B2RQC6 | CAD protein OS=Mus musculus GN=Cad PE=1 SV=1                                                         | 5.52809  | 8  | 16  | 8  | 243.084 | 6.43  | 3200000  | 3100000  | 2000000  | 52.45703 |
| Q6P4T2 | U5 small nuclear ribonucleoprotein 200 kDa helicase OS=Mus musculus GN=Snrnp200 PE=1 SV=1            | 16.94757 | 31 | 78  | 31 | 244.392 | 6.06  | 9300000  | 9600000  | 9400000  | 237.5527 |
| A2AGH6 | Mediator of RNA polymerase II transcription subunit 12 OS=Mus musculus GN=Med12 PE=1 SV=1            | 0.547945 | 1  | 1   | 1  | 244.407 | 7.17  |          |          |          | 2.691059 |
| Q8BZN6 | Dedicator of cytokinesis protein 10 OS=Mus musculus GN=Dock10 PE=1 SV=3                              | 1.953488 | 3  | 5   | 3  | 245.602 | 7.05  |          | 1100000  | 1100000  | 11.41499 |
| Q8C9B9 | Death-inducer obliterator 1 OS=Mus musculus GN=Dido1 PE=1 SV=4                                       | 5.141844 | 6  | 9   | 6  | 247.024 | 7.91  | 740000   | 690000   | 900000   | 27.97818 |
| Q8CJF7 | Protein ELYS OS=Mus musculus GN=Ahctf1 PE=1 SV=1                                                     | 5.260811 | 7  | 12  | 7  | 247.493 | 6.55  | 1000000  | 1400000  | 1500000  | 45.76684 |
| Q5D862 | SWISS-PROT:Q5D862 Tax_Id=9606 Gene_Symbol=FLG2 Filaggrin-2 x                                         | 8.657465 | 10 | 20  | 10 | 247.928 | 8.31  | 2800000  | 210000   | 15000000 | 69.15583 |
| E9PZJ8 | Activating signal cointegrator 1 complex subunit 3 OS=Mus musculus GN=Ascc3 PE=1 SV=1                | 2.320291 | 4  | 9   | 4  | 250.398 | 7.02  | 2500000  | 1900000  | 1800000  | 27.06479 |
| P83741 | Serine/threonine-protein kinase WNK1 OS=Mus musculus GN=Wnk1 PE=1 SV=2                               | 0.546908 | 1  | 3   | 1  | 250.779 | 6.43  | 2800000  | 1800000  | 440000   | 11.0951  |
| Q8VHY0 | Chondroitin sulfate proteoglycan 4 OS=Mus musculus GN=Cspg4 PE=1 SV=3                                | 13.70864 | 24 | 63  | 24 | 252.153 | 5.44  | 9500000  | 8300000  | 8500000  | 199.358  |
| Q71LX4 | Talin-2 OS=Mus musculus GN=Tln2 PE=1 SV=3                                                            | 2.021053 | 4  | 8   | 1  | 253.462 | 5.8   | 260000   |          |          | 26.49091 |
| B9EKR1 | Receptor-type tyrosine-protein phosphatase zeta OS=Mus musculus GN=Ptpz1 PE=1 SV=1                   | 4.108997 | 7  | 16  | 7  | 254.247 | 4.88  | 8700000  | 4400000  | 6500000  | 51.17191 |
| Q91VW5 | Golgin subfamily A member 4 OS=Mus musculus GN=Golga4 PE=1 SV=2                                      | 0.670241 | 1  | 1   | 1  | 257.406 | 5.36  | 410000   |          |          | 2.509235 |
| Q924A2 | Protein capicua homolog OS=Mus musculus GN=Cic PE=1 SV=2                                             | 0.63745  | 1  | 3   | 1  | 257.972 | 8.02  | 810000   | 860000   | 850000   | 7.934527 |
| Q69ZK6 | Probable JmjC domain-containing histone demethylation protein 2C OS=Mus musculus GN=Jmjd1c PE=1 SV=3 | 1.446809 | 3  | 4   | 3  | 260.479 | 8.07  | 750000   | 710000   | 1200000  | 9.02519  |
| B2RWS6 | Histone acetyltransferase p300 OS=Mus musculus GN=Ep300 PE=1 SV=2                                    | 1.741294 | 2  | 4   | 2  | 263.136 | 8.54  | 580000   | 430000   | 740000   | 13.62265 |
| Q5SWU9 | Acetyl-CoA carboxylase 1 OS=Mus musculus GN=Acaca PE=1 SV=1                                          | 1.705757 | 4  | 6   | 4  | 265.088 | 6.39  | 1100000  | 1300000  | 860000   | 15.79    |
| Q9QX47 | Protein SON OS=Mus musculus GN=Son PE=1 SV=2                                                         | 8.592471 | 14 | 32  | 14 | 265.483 | 5.6   | 4700000  | 4700000  | 4700000  | 97.40676 |
| Q6PR54 | Telomere-associated protein RIF1 OS=Mus musculus GN=Rif1 PE=1 SV=2                                   | 4.754031 | 8  | 13  | 8  | 266.063 | 5.57  | 1100000  | 1400000  | 1200000  | 35.68764 |
| Q6ZQ08 | CCR4-NOT transcription complex subunit 1 OS=Mus musculus GN=Cnot1 PE=1 SV=2                          | 4        | 8  | 15  | 8  | 266.637 | 7.11  | 2500000  | 2800000  | 2400000  | 39.30966 |
| Q9WU42 | Nuclear receptor corepressor 2 OS=Mus musculus GN=Ncor2 PE=1 SV=3                                    | 0.687702 | 1  | 3   | 1  | 269.642 | 7.44  | 2000000  | 2900000  | 1700000  | 7.439073 |
| P26039 | Talin-1 OS=Mus musculus GN=Tln1 PE=1 SV=2                                                            | 20.58245 | 40 | 110 | 37 | 269.653 | 6.18  | 11000000 | 12000000 | 9900000  | 352.9644 |
| P14873 | Microtubule-associated protein 1B OS=Mus musculus GN=Map1b PE=1 SV=2                                 | 21.30682 | 34 | 84  | 33 | 270.089 | 4.83  | 9400000  | 17000000 | 5900000  | 266.6753 |
| Q64512 | Tyrosine-protein phosphatase non-receptor type 13 OS=Mus musculus GN=Ptpn13 PE=1 SV=2                | 1.222992 | 2  | 3   | 2  | 270.167 | 6.37  | 650000   |          | 590000   | 6.475545 |
| Q60974 | Nuclear receptor corepressor 1 OS=Mus musculus GN=Ncor1 PE=1 SV=1                                    | 2.03832  | 3  | 3   | 3  | 270.477 | 6.93  |          | 630000   | 220000   | 7.596198 |
| P19096 | Fatty acid synthase OS=Mus musculus GN=Fasn PE=1 SV=2                                                | 12.85942 | 26 | 50  | 26 | 272.257 | 6.58  | 6900000  | 6700000  | 6200000  | 145.2928 |
| P11276 | Fibronectin OS=Mus musculus GN=Fn1 PE=1 SV=4                                                         | 27.93702 | 51 | 190 | 51 | 272.368 | 5.59  | 70000000 | 74000000 | 64000000 | 616.8636 |
| Q99PV0 | Pre-mRNA-processing-splicing factor 8 OS=Mus musculus GN=Prpf8 PE=1 SV=2                             | 13.40471 | 27 | 59  | 27 | 273.443 | 8.84  | 8100000  | 9500000  | 9900000  | 164.7492 |
| F6ZDS4 | Nucleoprotein TPR OS=Mus musculus GN=Tpr PE=1 SV=1                                                   | 15.05553 | 30 | 68  | 30 | 273.824 | 5.03  | 6700000  | 5600000  | 6300000  | 215.6776 |
| Q99NH0 | Ankyrin repeat domain-containing protein 17 OS=Mus musculus GN=Ankrd17 PE=1 SV=2                     | 3.419132 | 7  | 14  | 7  | 274.043 | 6.52  | 4000000  | 3300000  | 3500000  | 35.69546 |
| Q62261 | Spectrin beta chain, non-erythrocytic 1 OS=Mus musculus GN=Sptbn1 PE=1 SV=2                          | 39.6953  | 77 | 229 | 77 | 274.052 | 5.58  | 25000000 | 21000000 | 21000000 | 696.7681 |
| Q80X90 | Filamin-B OS=Mus musculus GN=Flnb PE=1 SV=3                                                          | 29.01614 | 57 | 166 | 50 | 277.651 | 5.71  | 16000000 | 16000000 | 14000000 | 515.4468 |
| Q61687 | Transcriptional regulator ATRX OS=Mus musculus GN=Atrx PE=1 SV=3                                     | 11.14701 | 22 | 48  | 22 | 278.414 | 6.68  | 6300000  | 6700000  | 6500000  | 144.2938 |
| Q80SU7 | Interferon-induced very large GTPase 1 OS=Mus musculus GN=Gvin1 PE=1 SV=1                            | 10.87763 | 24 | 53  | 24 | 280.637 | 6.57  | 6200000  | 8600000  | 7900000  | 139.2073 |
| Q8BTM8 | Filamin-A OS=Mus musculus GN=Flna PE=1 SV=5                                                          | 40.4609  | 75 | 235 | 69 | 281.046 | 6.04  | 41000000 | 42000000 | 39000000 | 761.6833 |
| Q86YZ3 | SWISS-PROT:Q86YZ3 Tax_Id=9606 Gene_Symbol=HRNR Hornerin x                                            | 16.17544 | 13 | 34  | 13 | 282.228 | 10.04 | 2900000  | 360000   | 13000000 | 105.0293 |
| P16546 | Spectrin alpha chain, non-erythrocytic 1 OS=Mus musculus GN=Sptan1 PE=1 SV=4                         | 42.27346 | 92 | 257 | 92 | 284.422 | 5.33  | 32000000 | 24000000 | 23000000 | 844.848  |
| E9Q5F9 | Histone-lysine N-methyltransferase SETD2 OS=Mus musculus GN=Setd2 PE=1 SV=1                          | 1.340166 | 2  | 2   | 2  | 285.486 | 6.3   |          | 370000   |          | 6.324831 |
| Q9JLN9 | Serine/threonine-protein kinase mTOR OS=Mus musculus GN=Mtor PE=1 SV=2                               | 0.706159 | 1  | 3   | 1  | 288.605 | 7.17  | 1200000  | 1000000  | 720000   | 9.624419 |
| Q69ZR2 | E3 ubiquitin-protein ligase HECTD1 OS=Mus musculus GN=Hectd1 PE=1 SV=2                               | 1.680672 | 3  | 5   | 3  | 289.905 | 5.41  | 960000   | 460000   | 280000   | 12.88612 |
| P70398 | Probable ubiquitin carboxyl-terminal hydrolase FAF-X OS=Mus musculus GN=Usp9x PE=1 SV=2              | 7.033998 | 13 | 27  | 13 | 290.526 | 5.87  | 2800000  | 2400000  | 2500000  | 80.49914 |
| Q8VHX6 | Filamin-C OS=Mus musculus GN=Flnc PE=1 SV=3                                                          | 12.76596 | 27 | 66  | 19 | 290.937 | 5.95  | 15000000 | 13000000 | 8900000  | 196.5513 |
| Q80YV3 | Transformation/transcription domain-associated protein OS=Mus musculus GN=Trrap PE=1 SV=2            | 0.545809 | 1  | 2   | 1  | 291.37  | 8.48  |          | 660000   | 840000   | 4.885284 |
| E9PVA8 | eIF-2-alpha kinase activator GCN1 OS=Mus musculus GN=Gcn1 PE=1 SV=1                                  | 4.941969 | 11 | 24  | 11 | 292.834 | 7.36  | 2300000  | 2600000  | 2700000  | 65.53488 |

|        |                                                                                                         |          |     |     |     |         |       |          |          |          |          |
|--------|---------------------------------------------------------------------------------------------------------|----------|-----|-----|-----|---------|-------|----------|----------|----------|----------|
| Q8BTI8 | Serine/arginine repetitive matrix protein 2 OS=Mus musculus GN=Srrm2 PE=1 SV=3                          | 9.100999 | 16  | 47  | 16  | 294.666 | 12.03 | 11000000 | 10000000 | 7800000  | 129.8407 |
| Q9QYR6 | Microtubule-associated protein 1A OS=Mus musculus GN=Map1a PE=1 SV=2                                    | 10.1585  | 20  | 42  | 19  | 299.957 | 5     | 7200000  | 4000000  | 3900000  | 119.431  |
| E9Q394 | A-kinase anchor protein 13 OS=Mus musculus GN=Akap13 PE=1 SV=1                                          | 0.396254 | 1   | 3   | 1   | 303.786 | 5.38  | 570000   | 670000   | 640000   | 7.837524 |
| Q9Z329 | Inositol 1,4,5-trisphosphate receptor type 2 OS=Mus musculus GN=Itpr2 PE=1 SV=4                         | 4.035542 | 6   | 12  | 6   | 307.278 | 6.44  | 1900000  | 1300000  | 1600000  | 40.92409 |
| Q3TLH4 | Protein PRRC2C OS=Mus musculus GN=Prcc2c PE=1 SV=3                                                      | 6.711174 | 11  | 26  | 11  | 310.703 | 9.1   | 3200000  | 3500000  | 3200000  | 79.02741 |
| Q61554 | Fibrillin-1 OS=Mus musculus GN=Fbn1 PE=1 SV=2                                                           | 30.38636 | 60  | 220 | 59  | 312.083 | 4.92  | 25000000 | 26000000 | 26000000 | 627.581  |
| P11881 | Inositol 1,4,5-trisphosphate receptor type 1 OS=Mus musculus GN=Itpr1 PE=1 SV=2                         | 3.965078 | 7   | 13  | 7   | 312.968 | 6.04  | 2000000  | 1800000  | 2000000  | 43.51667 |
| Q61555 | Fibrillin-2 OS=Mus musculus GN=Fbn2 PE=1 SV=2                                                           | 4.712762 | 10  | 21  | 9   | 313.601 | 4.84  | 3800000  | 2000000  | 1800000  | 57.40481 |
| Q6KCD5 | Nipped-B-like protein OS=Mus musculus GN=Nipbl PE=1 SV=1                                                | 2.037169 | 4   | 10  | 4   | 315.253 | 7.91  | 940000   | 760000   | 910000   | 31.27625 |
| Q9ESE1 | Lipopolysaccharide-responsive and beige-like anchor protein OS=Mus musculus GN=Lrba PE=1 SV=1           | 1.995798 | 3   | 3   | 2   | 316.863 | 5.69  |          |          | 490000   | 7.055546 |
| Q5XG71 | Small subunit processome component 20 homolog OS=Mus musculus GN=Utp20 PE=1 SV=2                        | 2.51076  | 6   | 9   | 6   | 317.542 | 8.09  | 1500000  | 850000   | 780000   | 25.02249 |
| Q04690 | Neurofibromin OS=Mus musculus GN=Nf1 PE=1 SV=1                                                          | 0.457585 | 1   | 1   | 1   | 319.391 | 7.39  | 340000   |          |          | 2.547549 |
| Q9EPN1 | Neurobeachin OS=Mus musculus GN=Nbea PE=1 SV=1                                                          | 0.919619 | 2   | 2   | 1   | 326.536 | 6.2   | 480000   |          |          | 4.799632 |
| E9Q6J5 | Biorientation of chromosomes in cell division protein 1-like 1 OS=Mus musculus GN=Bod1l PE=1 SV=1       | 7.124011 | 13  | 24  | 13  | 327.254 | 5.33  | 1300000  | 1200000  | 1300000  | 64.83739 |
| Q5SSH7 | Zinc finger ZZ-type and EF-hand domain-containing protein 1 OS=Mus musculus GN=Zzef1 PE=1 SV=2          | 0.512996 | 1   | 1   | 1   | 328.102 | 6.11  | 400000   |          |          | 2.41324  |
| E9QAM5 | Helicase with zinc finger domain 2 OS=Mus musculus GN=Helz2 PE=1 SV=1                                   | 0.305395 | 1   | 1   | 1   | 331.352 | 8.07  |          | 19000000 |          | 2.312547 |
| E9Q557 | Desmoplakin OS=Mus musculus GN=Dsp PE=1 SV=1                                                            | 5.861949 | 16  | 21  | 16  | 332.706 | 6.8   | 3500000  |          | 13000000 | 56.0923  |
| A2AJK6 | Chromodomain-helicase-DNA-binding protein 7 OS=Mus musculus GN=Chd7 PE=1 SV=1                           | 0.334896 | 1   | 1   | 1   | 333.851 | 6.47  |          |          | 230000   | 2.259637 |
| Q6PNC0 | DmX-like protein 1 OS=Mus musculus GN=Dmx1 PE=1 SV=1                                                    | 0.564222 | 1   | 1   | 1   | 335.796 | 6.42  | 560000   |          |          | 2.838331 |
| Q8CHI8 | E1A-binding protein p400 OS=Mus musculus GN=Ep400 PE=1 SV=3                                             | 0.520833 | 1   | 3   | 1   | 336.97  | 9.14  | 340000   | 370000   | 76000    | 8.366226 |
| P19137 | Laminin subunit alpha-1 OS=Mus musculus GN=Lama1 PE=1 SV=1                                              | 1.297017 | 2   | 3   | 2   | 337.954 | 6.7   |          | 350000   | 150000   | 8.674555 |
| Q8BPN8 | DmX-like protein 2 OS=Mus musculus GN=Dmx2 PE=1 SV=3                                                    | 0.824538 | 2   | 2   | 2   | 337.995 | 6.42  | 2000000  |          |          | 5.608686 |
| E9Q8I9 | Protein furry homolog OS=Mus musculus GN=Fry PE=1 SV=1                                                  | 0.529801 | 1   | 2   | 1   | 338.877 | 6.01  |          | 690000   | 760000   | 5.354158 |
| Q60847 | Collagen alpha-1(XII) chain OS=Mus musculus GN=Col12a1 PE=2 SV=3                                        | 20.89744 | 52  | 144 | 52  | 340.004 | 5.64  | 18000000 | 21000000 | 17000000 | 414.4459 |
| Q9ERU9 | E3 SUMO-protein ligase RanBP2 OS=Mus musculus GN=Ranbp2 PE=1 SV=2                                       | 15.03439 | 31  | 67  | 31  | 340.907 | 6.18  | 4400000  | 5600000  | 5000000  | 215.2698 |
| Q60675 | Laminin subunit alpha-2 OS=Mus musculus GN=Lama2 PE=1 SV=2                                              | 4.00898  | 10  | 20  | 10  | 343.593 | 6.09  | 1300000  | 1800000  | 1900000  | 55.15971 |
| P42859 | Huntingtin OS=Mus musculus GN=Htt PE=1 SV=2                                                             | 1.923693 | 4   | 7   | 4   | 344.471 | 6.29  | 380000   | 930000   | 710000   | 18.64428 |
| Q0KL02 | Triple functional domain protein OS=Mus musculus GN=Trio PE=1 SV=3                                      | 4.190845 | 7   | 13  | 7   | 347.643 | 6.35  | 1900000  | 1500000  | 1500000  | 36.37343 |
| Q62388 | Serine-protein kinase ATM OS=Mus musculus GN=Atm PE=1 SV=2                                              | 0.782779 | 2   | 2   | 2   | 349.195 | 6.86  |          | 270000   |          | 4.934385 |
| E9PVX6 | Proliferation marker protein Ki-67 OS=Mus musculus GN=Mki67 PE=1 SV=1                                   | 16.36764 | 33  | 72  | 33  | 350.65  | 9.72  | 3500000  | 4400000  | 4300000  | 218.2965 |
| Q912I0 | Cadherin EGF LAG seven-pass G-type receptor 3 OS=Mus musculus GN=Celsr3 PE=2 SV=2                       | 0.242351 | 1   | 1   | 1   | 358.253 | 6.6   |          | 190000   |          | 1.848692 |
| Q5H8C4 | Vacuolar protein sorting-associated protein 13A OS=Mus musculus GN=Vps13a PE=1 SV=1                     | 0.442198 | 1   | 1   | 1   | 359.173 | 6.19  |          |          | 550000   | 1.949951 |
| Q62059 | Versican core protein OS=Mus musculus GN=Vcan PE=1 SV=2                                                 | 6.374739 | 16  | 54  | 16  | 366.56  | 4.64  | 19000000 | 19000000 | 19000000 | 175.3965 |
| Q05793 | Basement membrane-specific heparan sulfate proteoglycan core protein OS=Mus musculus GN=Hspg2 PE=1 SV=1 | 20.23199 | 54  | 142 | 54  | 398.039 | 6.32  | 20000000 | 21000000 | 17000000 | 418.1166 |
| Q61001 | Laminin subunit alpha-5 OS=Mus musculus GN=Lama5 PE=1 SV=4                                              | 1.667563 | 4   | 9   | 4   | 403.792 | 6.73  | 550000   | 760000   | 620000   | 24.21896 |
| Q8BKX6 | Serine/threonine-protein kinase SMG1 OS=Mus musculus GN=Smg1 PE=1 SV=3                                  | 0.820212 | 2   | 4   | 2   | 409.511 | 6.4   | 1100000  | 760000   | 640000   | 10.42797 |
| O88737 | Protein bassoon OS=Mus musculus GN=Bsn PE=1 SV=4                                                        | 2.714358 | 8   | 10  | 8   | 418.587 | 7.71  | 1300000  | 410000   |          | 28.03769 |
| Q8BX70 | Vacuolar protein sorting-associated protein 13C OS=Mus musculus GN=Vps13c PE=1 SV=2                     | 0.800427 | 2   | 3   | 2   | 419.824 | 6.81  | 1200000  | 790000   |          | 8.15837  |
| P11531 | Dystrophin OS=Mus musculus GN=Dmd PE=1 SV=3                                                             | 0.788472 | 2   | 3   | 2   | 425.566 | 5.94  | 650000   | 490000   |          | 9.037947 |
| Q8C8R3 | Ankyrin-2 OS=Mus musculus GN=Ank2 PE=1 SV=2                                                             | 8.337609 | 22  | 48  | 22  | 425.999 | 5.17  | 6700000  | 3800000  | 2400000  | 147.4763 |
| P20930 | SWISS-PROT:P20930 Tax_Id=9606 Gene_Symbol=FLG Filaggrin                                                 | 3.398178 | 7   | 8   | 7   | 434.922 | 9.25  |          |          | 4200000  | 26.14606 |
| Q70FJ1 | A-kinase anchor protein 9 OS=Mus musculus GN=Akap9 PE=1 SV=2                                            | 1.053463 | 3   | 4   | 3   | 435.943 | 5.03  | 680000   | 920000   | 370000   | 8.707236 |
| Q7TMY8 | E3 ubiquitin-protein ligase HUWE1 OS=Mus musculus GN=Huwe1 PE=1 SV=5                                    | 0.731094 | 2   | 2   | 2   | 482.332 | 5.22  |          | 800000   | 45000    | 6.08107  |
| Q91ZX7 | Prolow-density lipoprotein receptor-related protein 1 OS=Mus musculus GN=Lrp1 PE=1 SV=1                 | 8.250825 | 24  | 48  | 24  | 504.411 | 5.36  | 2700000  | 2600000  | 2200000  | 147.6453 |
| Q7TPH6 | E3 ubiquitin-protein ligase MYCBP2 OS=Mus musculus GN=Mycbp2 PE=1 SV=2                                  | 1.231161 | 4   | 7   | 4   | 517.408 | 7.12  | 650000   | 960000   | 1100000  | 17.177   |
| Q9JHU4 | Cytoplasmic dynein 1 heavy chain 1 OS=Mus musculus GN=Dync1h1 PE=1 SV=2                                 | 18.64772 | 77  | 206 | 77  | 531.71  | 6.42  | 19000000 | 16000000 | 15000000 | 585.4603 |
| O88738 | Baculoviral IAP repeat-containing protein 6 OS=Mus musculus GN=Birc6 PE=1 SV=2                          | 0.327735 | 1   | 3   | 1   | 531.833 | 6.07  | 790000   | 1000000  | 520000   | 10.78244 |
| Q9QXS1 | Plectin OS=Mus musculus GN=Plec PE=1 SV=3                                                               | 33.06331 | 136 | 361 | 135 | 533.861 | 5.96  | 23000000 | 24000000 | 22000000 | 1083.489 |
| Q9QYX7 | Protein piccolo OS=Mus musculus GN=Pclo PE=1 SV=4                                                       | 0.611681 | 2   | 2   | 2   | 550.496 | 6.51  | 660000   |          |          | 4.512348 |
| A2AN08 | E3 ubiquitin-protein ligase UBR4 OS=Mus musculus GN=Ubr4 PE=1 SV=1                                      | 2.799228 | 11  | 15  | 11  | 571.927 | 6.06  | 1900000  | 1600000  | 1400000  | 42.88091 |
| Q80W93 | Hydrocephalus-inducing protein OS=Mus musculus GN=Hydin PE=1 SV=2                                       | 0.213426 | 1   | 1   | 1   | 581.154 | 6.38  | 4200000  |          |          | 1.877604 |
| E9Q555 | E3 ubiquitin-protein ligase RNF213 OS=Mus musculus GN=Rnf213 PE=1 SV=2                                  | 13.02407 | 55  | 124 | 55  | 584.411 | 6.8   | 9500000  | 9700000  | 8900000  | 364.8502 |
| Q6ZWQ0 | Nesprin-2 OS=Mus musculus GN=Syne2 PE=1 SV=2                                                            | 1.338376 | 6   | 8   | 6   | 782.238 | 5.33  | 580000   | 440000   | 690000   | 25.02634 |

|        |                                                                             |          |    |    |    |         |      |         |         |         |          |
|--------|-----------------------------------------------------------------------------|----------|----|----|----|---------|------|---------|---------|---------|----------|
| Q9QXZ0 | Microtubule-actin cross-linking factor 1 OS=Mus musculus GN=Macf1 PE=1 SV=2 | 4.623334 | 26 | 56 | 25 | 831.362 | 5.43 | 2700000 | 9600000 | 1900000 | 160.3922 |
| Q91ZU6 | Dystonin OS=Mus musculus GN=Dst PE=1 SV=2                                   | 4.382524 | 24 | 48 | 24 | 833.701 | 5.31 | 2200000 | 1900000 | 2100000 | 143.9185 |
